# Supplementary material
Source: PubMed Central journal article supplement (PMC3740750)
Supplement: NIHMS491545-supplement-1_si_002.pdf [file NIHMS491545-supplement-1_si_002.pdf]

## **Supplemental Information**

### **Supplemental Table 2** MS/MS spectral data of proteins with single peptide identification

This table included MS/MS spectral data for protein identified with single significant peptide in TCDD treated and control zebrafish heart samples.

# Mascot Search Results

## Peptide View

MS/MS Fragmentation of **AEDKIPLLLVGNK**

Found in [gi|57528846|ref|NP\\_001003649.1](#), hypothetical protein LOC445255 [Danio rerio]

Match to Query 24320: 1538.262724 from(770.138638,2+) index(44561)

Data file TCDD\_0530.dta

Click mouse within plot area to zoom in by factor of two about that point

Or, Plot from  to  Da

Label all possible matches  Label matches used for scoring

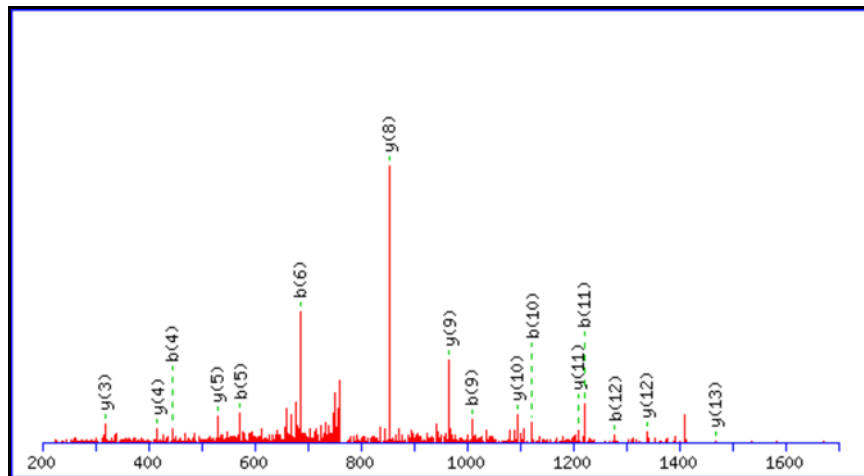

Monoisotopic mass of neutral peptide Mr(calc): 1537.8715

Ions Score: 65 Expect: 7.5e-005

Matches : 16/126 fragment ions using 26 most intense peaks ([help](#))

| #  | b         | b <sup>++</sup> | b*        | b <sup>+++</sup> | b <sup>0</sup> | b <sup>0++</sup> | Seq. | y         | y <sup>++</sup> | y*        | y <sup>+++</sup> | y <sup>0</sup> | y <sup>0++</sup> | #  |
|----|-----------|-----------------|-----------|------------------|----------------|------------------|------|-----------|-----------------|-----------|------------------|----------------|------------------|----|
| 1  | 72.0444   | 36.5258         |           |                  |                |                  | A    |           |                 |           |                  |                |                  | 14 |
| 2  | 201.0870  | 101.0471        |           |                  | 183.0764       | 92.0418          | E    | 1467.8417 | 734.4245        | 1450.8152 | 725.9112         | 1449.8312      | 725.4192         | 13 |
| 3  | 330.1296  | 165.5684        |           |                  | 312.1190       | 156.5631         | E    | 1338.7991 | 669.9032        | 1321.7726 | 661.3899         | 1320.7886      | 660.8979         | 12 |
| 4  | 445.1565  | 223.0819        |           |                  | 427.1460       | 214.0766         | D    | 1209.7565 | 605.3819        | 1192.7300 | 596.8686         | 1191.7460      | 596.3766         | 11 |
| 5  | 573.2515  | 287.1294        | 556.2249  | 278.6161         | 555.2409       | 278.1241         | K    | 1094.7296 | 547.8684        | 1077.7030 | 539.3552         |                |                  | 10 |
| 6  | 686.3355  | 343.6714        | 669.3090  | 335.1581         | 668.3250       | 334.6661         | I    | 966.6346  | 483.8210        | 949.6081  | 475.3077         |                |                  | 9  |
| 7  | 783.3883  | 392.1978        | 766.3618  | 383.6845         | 765.3777       | 383.1925         | P    | 853.5506  | 427.2789        | 836.5240  | 418.7656         |                |                  | 8  |
| 8  | 896.4724  | 448.7398        | 879.4458  | 440.2266         | 878.4618       | 439.7345         | L    | 756.4978  | 378.7525        | 739.4713  | 370.2393         |                |                  | 7  |
| 9  | 1009.5564 | 505.2819        | 992.5299  | 496.7686         | 991.5459       | 496.2766         | L    | 643.4137  | 322.2105        | 626.3872  | 313.6972         |                |                  | 6  |
| 10 | 1122.6405 | 561.8239        | 1105.6140 | 553.3106         | 1104.6299      | 552.8186         | L    | 530.3297  | 265.6685        | 513.3031  | 257.1552         |                |                  | 5  |
| 11 | 1221.7089 | 611.3581        | 1204.6824 | 602.8448         | 1203.6984      | 602.3528         | V    | 417.2456  | 209.1264        | 400.2191  | 200.6132         |                |                  | 4  |
| 12 | 1278.7304 | 639.8688        | 1261.7038 | 631.3556         | 1260.7198      | 630.8635         | G    | 318.1772  | 159.5922        | 301.1506  | 151.0790         |                |                  | 3  |
| 13 | 1392.7733 | 696.8903        | 1375.7468 | 688.3770         | 1374.7627      | 687.8850         | N    | 261.1557  | 131.0815        | 244.1292  | 122.5682         |                |                  | 2  |
| 14 |           |                 |           |                  |                |                  | K    | 147.1128  | 74.0600         | 130.0863  | 65.5468          |                |                  | 1  |

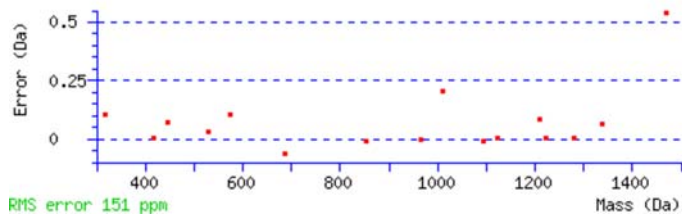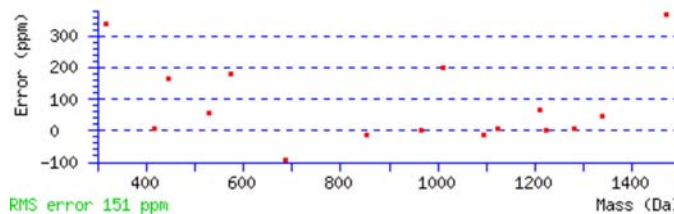

NCBI **BLAST** search of [AEEDKIPLLLVGNK](#)  
 (Parameters: blastp, nr protein database, expect=20000, no filter, PAM30)  
 Other BLAST [web gateways](#)

**All matches to this query**

| Score | Mr(calc): | Delta   | Sequence                         |
|-------|-----------|---------|----------------------------------|
| 65.4  | 1537.8715 | 0.3912  | <a href="#">AEEDKIPLLLVGNK</a>   |
| 15.7  | 1536.9351 | 1.3276  | <a href="#">AKESLRPNGVIIIK</a>   |
| 13.6  | 1537.7776 | 0.4851  | <a href="#">KVYYDPSSPGALGGK</a>  |
| 8.9   | 1537.6791 | 0.5836  | <a href="#">MQGSQGDQKSSSGGGK</a> |
| 7.0   | 1538.6770 | -0.4143 | <a href="#">ETVSESDQVCLSK</a>    |
| 4.6   | 1537.7736 | 0.4891  | <a href="#">RISGESSEYLVNGK</a>   |
| 4.0   | 1537.7485 | 0.5142  | <a href="#">GNQGEPGGEPGLKGNK</a> |
| 3.8   | 1538.7001 | -0.4374 | <a href="#">QFSSFEAGAQNPK</a>    |
| 3.7   | 1537.7386 | 0.5241  | <a href="#">QGGSLHNQGNVWGGK</a>  |
| 3.6   | 1538.7221 | -0.4594 | <a href="#">AETPPLNMEHLCK</a>    |

Mascot: <http://www.matrixscience.com/>

**MASCOT** SCIENCE **Mascot Search Results**

**Peptide View**

MS/MS Fragmentation of **AHIVDFDHQAVDGVQEQR**

Found in [gi|62955581|ref|NP\\_001017804.1](#), hypothetical protein LOC550502 [Danio rerio]

Match to Query 67963: 2224.762724 from(1113.388638,2+) index(45652)

Data file TCDD\_0530.dta

Click mouse within plot area to zoom in by factor of two about that point

Or, Plot from  to  Da

Label all possible matches  Label matches used for scoring

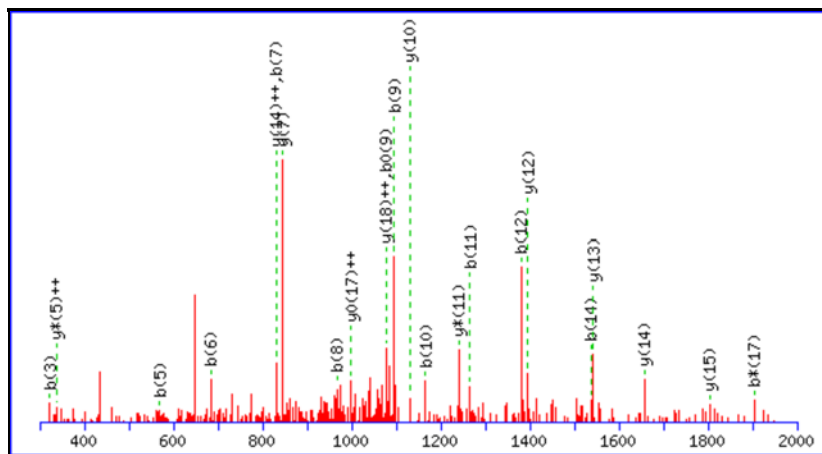

Monoisotopic mass of neutral peptide Mr(calc): 2224.0661

Ions Score: 41 Expect: 0.016

Matches : 23/188 fragment ions using 51 most intense peaks ([help](#))

| #  | b         | b <sup>++</sup> | b*        | b <sup>*++</sup> | b <sup>0</sup> | b <sup>0++</sup> | Seq. | y         | y <sup>++</sup> | y*        | y <sup>*++</sup> | y <sup>0</sup> | y <sup>0++</sup> | #  |
|----|-----------|-----------------|-----------|------------------|----------------|------------------|------|-----------|-----------------|-----------|------------------|----------------|------------------|----|
| 1  | 72.0444   | 36.5258         |           |                  |                |                  | A    |           |                 |           |                  |                |                  | 19 |
| 2  | 209.1033  | 105.0553        |           |                  |                |                  | H    | 2154.0363 | 1077.5218       | 2137.0097 | 1069.0085        | 2136.0257      | 1068.5165        | 18 |
| 3  | 322.1874  | 161.5973        |           |                  |                |                  | I    | 2016.9774 | 1008.9923       | 1999.9508 | 1000.4791        | 1998.9668      | 999.9870         | 17 |
| 4  | 421.2558  | 211.1315        |           |                  |                |                  | V    | 1903.8933 | 952.4503        | 1886.8668 | 943.9370         | 1885.8828      | 943.4450         | 16 |
| 5  | 568.3242  | 284.6657        |           |                  |                |                  | F    | 1804.8249 | 902.9161        | 1787.7984 | 894.4028         | 1786.8143      | 893.9108         | 15 |
| 6  | 683.3511  | 342.1792        |           |                  | 665.3406       | 333.1739         | D    | 1657.7565 | 829.3819        | 1640.7299 | 820.8686         | 1639.7459      | 820.3766         | 14 |
| 7  | 830.4196  | 415.7134        |           |                  | 812.4090       | 406.7081         | F    | 1542.7295 | 771.8684        | 1525.7030 | 763.3551         | 1524.7190      | 762.8631         | 13 |
| 8  | 967.4785  | 484.2429        |           |                  | 949.4679       | 475.2376         | H    | 1395.6611 | 698.3342        | 1378.6346 | 689.8209         | 1377.6506      | 689.3289         | 12 |
| 9  | 1095.5370 | 548.2722        | 1078.5105 | 539.7589         | 1077.5265      | 539.2669         | Q    | 1258.6022 | 629.8047        | 1241.5757 | 621.2915         | 1240.5917      | 620.7995         | 11 |
| 10 | 1166.5742 | 583.7907        | 1149.5476 | 575.2774         | 1148.5636      | 574.7854         | A    | 1130.5436 | 565.7755        | 1113.5171 | 557.2622         | 1112.5331      | 556.7702         | 10 |
| 11 | 1265.6426 | 633.3249        | 1248.6160 | 624.8116         | 1247.6320      | 624.3196         | V    | 1059.5065 | 530.2569        | 1042.4800 | 521.7436         | 1041.4960      | 521.2516         | 9  |
| 12 | 1380.6695 | 690.8384        | 1363.6430 | 682.3251         | 1362.6589      | 681.8331         | D    | 960.4381  | 480.7227        | 943.4116  | 472.2094         | 942.4276       | 471.7174         | 8  |
| 13 | 1437.6910 | 719.3491        | 1420.6644 | 710.8359         | 1419.6804      | 710.3438         | G    | 845.4112  | 423.2092        | 828.3846  | 414.6959         | 827.4006       | 414.2039         | 7  |
| 14 | 1536.7594 | 768.8833        | 1519.7328 | 760.3701         | 1518.7488      | 759.8781         | V    | 788.3897  | 394.6985        | 771.3632  | 386.1852         | 770.3791       | 385.6932         | 6  |
| 15 | 1664.8180 | 832.9126        | 1647.7914 | 824.3993         | 1646.8074      | 823.9073         | Q    | 689.3213  | 345.1643        | 672.2947  | 336.6510         | 671.3107       | 336.1590         | 5  |
| 16 | 1793.8606 | 897.4339        | 1776.8340 | 888.9206         | 1775.8500      | 888.4286         | E    | 561.2627  | 281.1350        | 544.2362  | 272.6217         | 543.2522       | 272.1297         | 4  |
| 17 | 1921.9191 | 961.4632        | 1904.8926 | 952.9499         | 1903.9086      | 952.4579         | Q    | 432.2201  | 216.6137        | 415.1936  | 208.1004         | 414.2096       | 207.6084         | 3  |
| 18 | 2050.9617 | 1025.9845       | 2033.9352 | 1017.4712        | 2032.9512      | 1016.9792        | E    | 304.1615  | 152.5844        | 287.1350  | 144.0711         | 286.1510       | 143.5791         | 2  |
| 19 |           |                 |           |                  |                |                  | R    | 175.1190  | 88.0631         | 158.0924  | 79.5498          |                |                  | 1  |



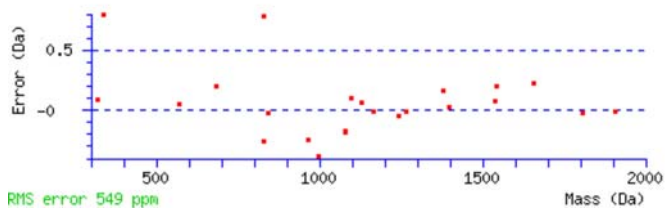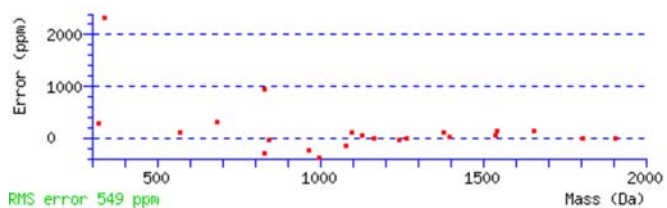

NCBI BLAST search of [AHIVDFHQAVDGVQEQR](#)

(Parameters: blastp, nr protein database, expect=20000, no filter, PAM30)

Other BLAST [web gateways](#)

**All matches to this query**

| Score | Mr(calc): | Delta   | Sequence                             |
|-------|-----------|---------|--------------------------------------|
| 41.0  | 2224.0661 | 0.6966  | <a href="#">AHIVDFHQAVDGVQEQR</a>    |
| 4.5   | 2223.1214 | 1.6414  | <a href="#">HNPLVMENEACKPVILSAMK</a> |
| 2.4   | 2224.9994 | -0.2367 | <a href="#">HCSVFASNDVFSDPVCGTRK</a> |
| 0.1   | 2223.0421 | 1.7206  | <a href="#">ADVCKCGALCLCSILAHYAR</a> |

Mascot: <http://www.matrixscience.com/>

# MASCOT SCIENCE Mascot Search Results

## Peptide View

MS/MS Fragmentation of **ALESAYGSEKPSL TSAAIR**

Found in [gi|50539806|ref|NP\\_001002369.1](#), hypothetical protein LOC436642 [Danio rerio]

Match to Query 44301: 1950.692724 from(976.353638,2+) index(36523)

Data file TCDD\_0530.dta

Click mouse within plot area to zoom in by factor of two about that point

Or, Plot from  to  Da

Label all possible matches  Label matches used for scoring

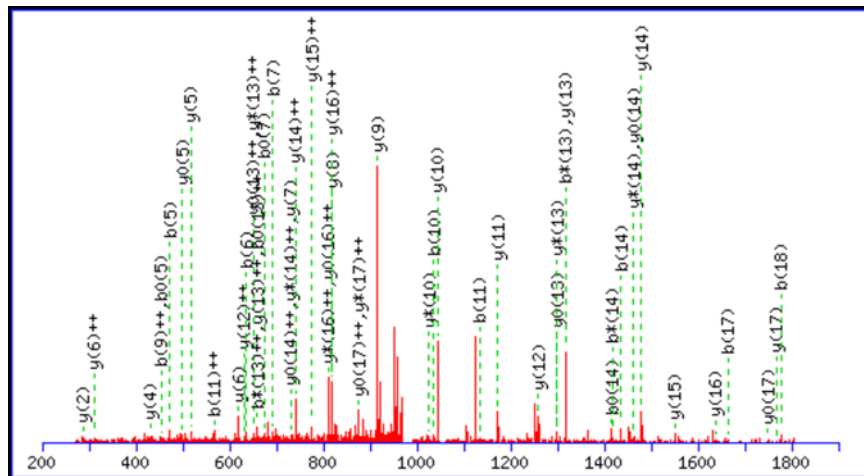

Monoisotopic mass of neutral peptide Mr(calc): 1950.0058

Ions Score: 49 Expect: 0.0027

Matches : 53/186 fragment ions using 160 most intense peaks [\(help\)](#)

| #  | b                | b <sup>++</sup> | b <sup>*</sup>   | b <sup>*++</sup> | b <sup>0</sup>   | b <sup>0++</sup> | Seq. | y                | y <sup>++</sup> | y <sup>*</sup>   | y <sup>*++</sup> | y <sup>0</sup>   | y <sup>0++</sup> | #  |
|----|------------------|-----------------|------------------|------------------|------------------|------------------|------|------------------|-----------------|------------------|------------------|------------------|------------------|----|
| 1  | 72.0444          | 36.5258         |                  |                  |                  |                  | A    |                  |                 |                  |                  |                  |                  | 19 |
| 2  | 185.1285         | 93.0679         |                  |                  |                  |                  | L    | 1879.9760        | 940.4916        | 1862.9494        | 931.9784         | 1861.9654        | 931.4863         | 18 |
| 3  | 314.1710         | 157.5892        |                  |                  | 296.1605         | 148.5839         | E    | <b>1766.8919</b> | 883.9496        | 1749.8654        | <b>875.4363</b>  | <b>1748.8814</b> | <b>874.9443</b>  | 17 |
| 4  | 401.2031         | 201.1052        |                  |                  | 383.1925         | 192.0999         | S    | <b>1637.8493</b> | <b>819.4283</b> | 1620.8228        | <b>810.9150</b>  | 1619.8388        | <b>810.4230</b>  | 16 |
| 5  | <b>472.2402</b>  | 236.6237        |                  |                  | <b>454.2296</b>  | 227.6184         | A    | <b>1550.8173</b> | <b>775.9123</b> | 1533.7907        | 767.3990         | 1532.8067        | 766.9070         | 15 |
| 6  | <b>635.3035</b>  | 318.1554        |                  |                  | 617.2930         | 309.1501         | Y    | <b>1479.7802</b> | <b>740.3937</b> | <b>1462.7536</b> | <b>731.8805</b>  | <b>1461.7696</b> | <b>731.3884</b>  | 14 |
| 7  | <b>692.3250</b>  | 346.6661        |                  |                  | <b>674.3144</b>  | 337.6608         | G    | <b>1316.7169</b> | <b>658.8621</b> | <b>1299.6903</b> | <b>650.3488</b>  | <b>1298.7063</b> | <b>649.8568</b>  | 13 |
| 8  | 779.3570         | 390.1821        |                  |                  | 761.3464         | 381.1769         | S    | <b>1259.6954</b> | <b>630.3513</b> | 1242.6688        | 621.8381         | 1241.6848        | 621.3461         | 12 |
| 9  | 908.3996         | <b>454.7034</b> |                  |                  | 890.3890         | 445.6982         | E    | <b>1172.6634</b> | 586.8353        | 1155.6368        | 578.3220         | 1154.6528        | 577.8300         | 11 |
| 10 | <b>1036.4946</b> | 518.7509        | 1019.4680        | 510.2376         | 1018.4840        | 509.7456         | K    | <b>1043.6208</b> | 522.3140        | <b>1026.5942</b> | 513.8007         | 1025.6102        | 513.3087         | 10 |
| 11 | <b>1133.5473</b> | <b>567.2773</b> | 1116.5208        | 558.7640         | 1115.5368        | 558.2720         | P    | <b>915.5258</b>  | 458.2665        | 898.4993         | 449.7533         | 897.5152         | 449.2613         | 9  |
| 12 | 1220.5794        | 610.7933        | 1203.5528        | 602.2800         | 1202.5688        | 601.7880         | S    | <b>818.4730</b>  | 409.7402        | 801.4465         | 401.2269         | 800.4625         | 400.7349         | 8  |
| 13 | 1333.6634        | 667.3353        | <b>1316.6369</b> | <b>658.8221</b>  | 1315.6529        | <b>658.3301</b>  | L    | <b>731.4410</b>  | 366.2241        | 714.4145         | 357.7109         | 713.4304         | 357.2189         | 7  |
| 14 | <b>1434.7111</b> | 717.8592        | <b>1417.6846</b> | 709.3459         | <b>1416.7005</b> | 708.8539         | T    | <b>618.3570</b>  | <b>309.6821</b> | 601.3304         | 301.1688         | 600.3464         | 300.6768         | 6  |
| 15 | 1521.7431        | 761.3752        | 1504.7166        | 752.8619         | 1503.7326        | 752.3699         | S    | <b>517.3093</b>  | 259.1583        | 500.2827         | 250.6450         | <b>499.2987</b>  | 250.1530         | 5  |
| 16 | 1592.7802        | 796.8938        | 1575.7537        | 788.3805         | 1574.7697        | 787.8885         | A    | <b>430.2772</b>  | 215.6423        | 413.2507         | 207.1290         |                  |                  | 4  |
| 17 | <b>1663.8174</b> | 832.4123        | 1646.7908        | 823.8990         | 1645.8068        | 823.4070         | A    | 359.2401         | 180.1237        | 342.2136         | 171.6104         |                  |                  | 3  |
| 18 | <b>1776.9014</b> | 888.9543        | 1759.8749        | 880.4411         | 1758.8909        | 879.9491         | I    | <b>288.2030</b>  | 144.6051        | 271.1765         | 136.0919         |                  |                  | 2  |
| 19 |                  |                 |                  |                  |                  |                  | R    | 175.1190         | 88.0631         | 158.0924         | 79.5498          |                  |                  | 1  |

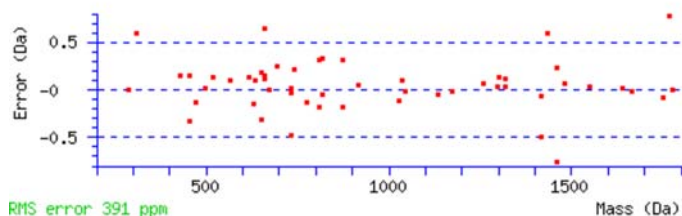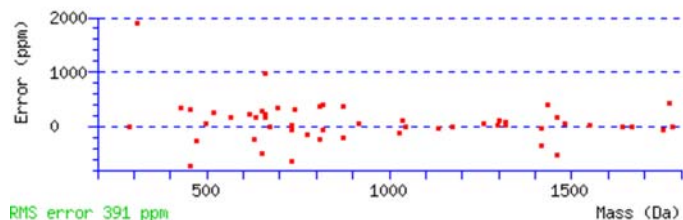

NCBI **BLAST** search of [ALESAYGSEKPSLTSAAIR](#)  
 (Parameters: blastp, nr protein database, expect=20000, no filter, PAM30)  
 Other BLAST [web gateways](#)

**All matches to this query**

| Score | Mr(calc): | Delta   | Sequence                            |
|-------|-----------|---------|-------------------------------------|
| 48.8  | 1950.0058 | 0.6870  | <a href="#">ALESAYGSEKPSLTSAAIR</a> |
| 1.6   | 1950.0244 | 0.6683  | <a href="#">SLLNAAADAVERIMVSYK</a>  |
| 1.1   | 1952.9592 | -2.2664 | <a href="#">YYEREGIQLDPSQISR</a>    |

**Mascot:** <http://www.matrixscience.com/>

# MASCOT SCIENCE Mascot Search Results

## Peptide View

MS/MS Fragmentation of **ALPFWNDEIVPQIK**

Found in [gi|38488700|ref|NP\\_942099.1](#), phosphoglycerate mutase 1 [Danio rerio]

Match to Query 28552: 1669.222724 from(835.618638,2+) index(107246)

Data file TCDD\_0530.dta

Click mouse within plot area to zoom in by factor of two about that point

Or, Plot from  to  Da

Label all possible matches  Label matches used for scoring

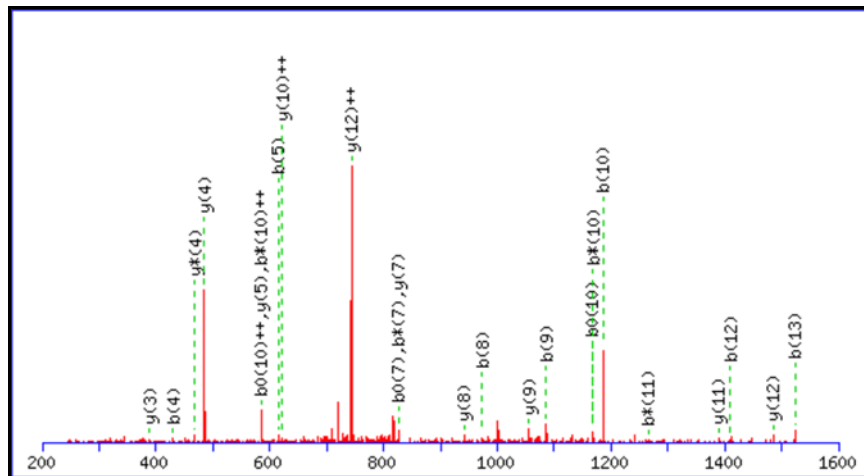

Monoisotopic mass of neutral peptide Mr(calc): 1668.8875

Ions Score: 47 Expect: 0.0056

Matches : 25/122 fragment ions using 52 most intense peaks ([help](#))

| #  | b                | b <sup>++</sup> | b <sup>*</sup>   | b <sup>*++</sup> | b <sup>0</sup>   | b <sup>0++</sup> | Seq. | y                | y <sup>++</sup> | y <sup>*</sup>  | y <sup>*++</sup> | y <sup>0</sup> | y <sup>0++</sup> | #  |
|----|------------------|-----------------|------------------|------------------|------------------|------------------|------|------------------|-----------------|-----------------|------------------|----------------|------------------|----|
| 1  | 72.0444          | 36.5258         |                  |                  |                  |                  | A    |                  |                 |                 |                  |                |                  | 14 |
| 2  | 185.1285         | 93.0679         |                  |                  |                  |                  | L    | 1598.8577        | 799.9325        | 1581.8312       | 791.4192         | 1580.8471      | 790.9272         | 13 |
| 3  | 282.1812         | 141.5942        |                  |                  |                  |                  | P    | <b>1485.7736</b> | <b>743.3905</b> | 1468.7471       | 734.8772         | 1467.7631      | 734.3852         | 12 |
| 4  | <b>429.2496</b>  | 215.1285        |                  |                  |                  |                  | F    | <b>1388.7209</b> | 694.8641        | 1371.6943       | 686.3508         | 1370.7103      | 685.8588         | 11 |
| 5  | <b>615.3289</b>  | 308.1681        |                  |                  |                  |                  | W    | 1241.6525        | <b>621.3299</b> | 1224.6259       | 612.8166         | 1223.6419      | 612.3246         | 10 |
| 6  | 729.3719         | 365.1896        | 712.3453         | 356.6763         |                  |                  | N    | <b>1055.5732</b> | 528.2902        | 1038.5466       | 519.7769         | 1037.5626      | 519.2849         | 9  |
| 7  | 844.3988         | 422.7030        | <b>827.3723</b>  | 414.1898         | <b>826.3882</b>  | 413.6978         | D    | <b>941.5302</b>  | 471.2688        | 924.5037        | 462.7555         | 923.5197       | 462.2635         | 8  |
| 8  | <b>973.4414</b>  | 487.2243        | 956.4149         | 478.7111         | 955.4308         | 478.2191         | E    | <b>826.5033</b>  | 413.7553        | 809.4767        | 405.2420         | 808.4927       | 404.7500         | 7  |
| 9  | <b>1086.5255</b> | 543.7664        | 1069.4989        | 535.2531         | 1068.5149        | 534.7611         | I    | 697.4607         | 349.2340        | 680.4341        | 340.7207         |                |                  | 6  |
| 10 | <b>1185.5939</b> | 593.3006        | <b>1168.5673</b> | <b>584.7873</b>  | <b>1167.5833</b> | <b>584.2953</b>  | V    | <b>584.3766</b>  | 292.6920        | 567.3501        | 284.1787         |                |                  | 5  |
| 11 | 1282.6466        | 641.8270        | <b>1265.6201</b> | 633.3137         | 1264.6361        | 632.8217         | P    | <b>485.3082</b>  | 243.1577        | <b>468.2817</b> | 234.6445         |                |                  | 4  |
| 12 | <b>1410.7052</b> | 705.8563        | 1393.6787        | 697.3430         | 1392.6947        | 696.8510         | Q    | <b>388.2554</b>  | 194.6314        | 371.2289        | 186.1181         |                |                  | 3  |
| 13 | <b>1523.7893</b> | 762.3983        | 1506.7627        | 753.8850         | 1505.7787        | 753.3930         | I    | 260.1969         | 130.6021        | 243.1703        | 122.0888         |                |                  | 2  |
| 14 |                  |                 |                  |                  |                  |                  | K    | 147.1128         | 74.0600         | 130.0863        | 65.5468          |                |                  | 1  |

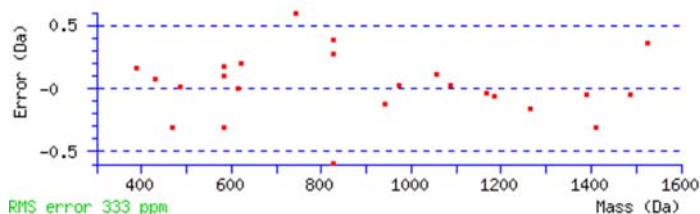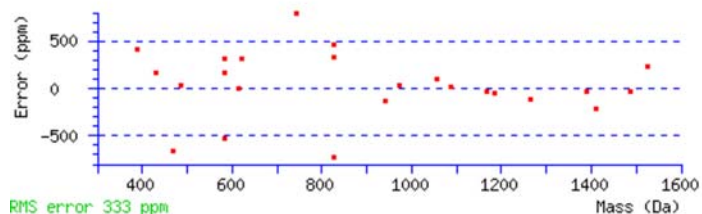

NCBI **BLAST** search of [ALPFWNDEIVPQIK](#)

(Parameters: blastp, nr protein database, expect=20000, no filter, PAM30)

Other BLAST [web gateways](#)

**All matches to this query**

| Score | Mr(calc): | Delta   | Sequence                         |
|-------|-----------|---------|----------------------------------|
| 46.5  | 1668.8875 | 0.3352  | <a href="#">ALPFWNDEIVPQIK</a>   |
| 14.6  | 1669.8538 | -0.6311 | <a href="#">FYGYPDGKPCILIK</a>   |
| 14.3  | 1669.9515 | -0.7288 | <a href="#">KIPFIGASIQNQLNK</a>  |
| 11.1  | 1670.9025 | -1.6798 | <a href="#">LAAETVSRGGIMPEK</a>  |
| 9.8   | 1669.8159 | -0.5931 | <a href="#">EVKEDQLVPEDQNK</a>   |
| 9.3   | 1668.0338 | 1.1889  | <a href="#">ISIIGLKSFAPGKPLK</a> |
| 7.9   | 1669.8709 | -0.6482 | <a href="#">EGKTSLPMPGVAENLK</a> |
| 7.8   | 1668.9464 | 0.2763  | <a href="#">TGRNFLHFVILQPK</a>   |
| 7.7   | 1669.9403 | -0.7176 | <a href="#">DLLSFHEKSQLLK</a>    |
| 6.8   | 1669.8675 | -0.6448 | <a href="#">SEAVVEYVFSGSRLK</a>  |

Mascot: <http://www.matrixscience.com/>

# MASCOT SCIENCE Mascot Search Results

## Peptide View

MS/MS Fragmentation of **ALPFWNEVIVPEIK**

Found in [gi|41056123|ref|NP\\_957318.1](#), phosphoglycerate mutase 2 (muscle) [Danio rerio]

Match to Query 27868: 1653.582724 from(827.798638,2+) index(22790)

Data file TCDD\_0530.dta

Click mouse within plot area to zoom in by factor of two about that point

Or, Plot from  to  Da

Label all possible matches  Label matches used for scoring

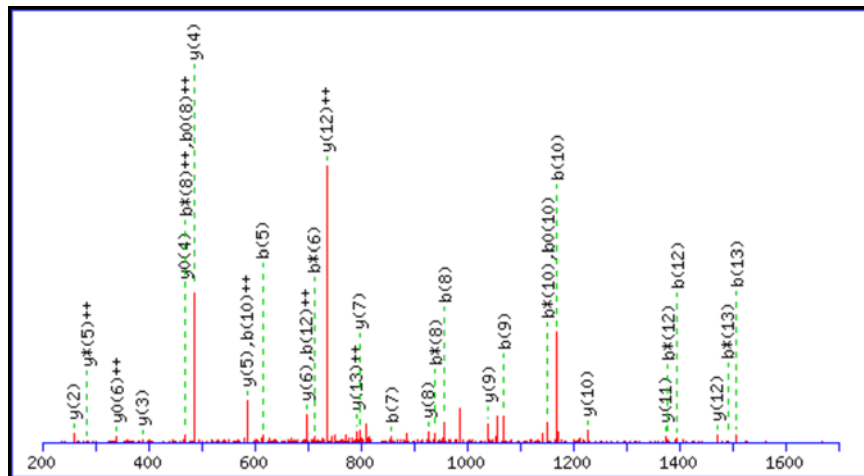

Monoisotopic mass of neutral peptide Mr(calc): 1653.9130

Ions Score: 70 Expect: 2.2e-005

Matches : 33/130 fragment ions using 53 most intense peaks ([help](#))

| #  | b         | b <sup>++</sup> | b <sup>*</sup> | b <sup>*++</sup> | b <sup>0</sup> | b <sup>0++</sup> | Seq. | y         | y <sup>++</sup> | y <sup>*</sup> | y <sup>*++</sup> | y <sup>0</sup> | y <sup>0++</sup> | #  |
|----|-----------|-----------------|----------------|------------------|----------------|------------------|------|-----------|-----------------|----------------|------------------|----------------|------------------|----|
| 1  | 72.0444   | 36.5258         |                |                  |                |                  | A    |           |                 |                |                  |                |                  | 14 |
| 2  | 185.1285  | 93.0679         |                |                  |                |                  | L    | 1583.8832 | 792.4452        | 1566.8566      | 783.9320         | 1565.8726      | 783.4400         | 13 |
| 3  | 282.1812  | 141.5942        |                |                  |                |                  | P    | 1470.7991 | 735.9032        | 1453.7726      | 727.3899         | 1452.7886      | 726.8979         | 12 |
| 4  | 429.2496  | 215.1285        |                |                  |                |                  | F    | 1373.7464 | 687.3768        | 1356.7198      | 678.8635         | 1355.7358      | 678.3715         | 11 |
| 5  | 615.3289  | 308.1681        |                |                  |                |                  | W    | 1226.6780 | 613.8426        | 1209.6514      | 605.3293         | 1208.6674      | 604.8373         | 10 |
| 6  | 729.3719  | 365.1896        | 712.3453       | 356.6763         |                |                  | N    | 1040.5986 | 520.8030        | 1023.5721      | 512.2897         | 1022.5881      | 511.7977         | 9  |
| 7  | 858.4145  | 429.7109        | 841.3879       | 421.1976         | 840.4039       | 420.7056         | E    | 926.5557  | 463.7815        | 909.5292       | 455.2682         | 908.5451       | 454.7762         | 8  |
| 8  | 957.4829  | 479.2451        | 940.4563       | 470.7318         | 939.4723       | 470.2398         | V    | 797.5131  | 399.2602        | 780.4866       | 390.7469         | 779.5026       | 390.2549         | 7  |
| 9  | 1070.5669 | 535.7871        | 1053.5404      | 527.2738         | 1052.5564      | 526.7818         | I    | 698.4447  | 349.7260        | 681.4182       | 341.2127         | 680.4341       | 340.7207         | 6  |
| 10 | 1169.6354 | 585.3213        | 1152.6088      | 576.8080         | 1151.6248      | 576.3160         | V    | 585.3606  | 293.1840        | 568.3341       | 284.6707         | 567.3501       | 284.1787         | 5  |
| 11 | 1266.6881 | 633.8477        | 1249.6616      | 625.3344         | 1248.6776      | 624.8424         | P    | 486.2922  | 243.6498        | 469.2657       | 235.1365         | 468.2817       | 234.6445         | 4  |
| 12 | 1395.7307 | 698.3690        | 1378.7042      | 689.8557         | 1377.7201      | 689.3637         | E    | 389.2395  | 195.1234        | 372.2129       | 186.6101         | 371.2289       | 186.1181         | 3  |
| 13 | 1508.8148 | 754.9110        | 1491.7882      | 746.3978         | 1490.8042      | 745.9057         | I    | 260.1969  | 130.6021        | 243.1703       | 122.0888         |                |                  | 2  |
| 14 |           |                 |                |                  |                |                  | K    | 147.1128  | 74.0600         | 130.0863       | 65.5468          |                |                  | 1  |

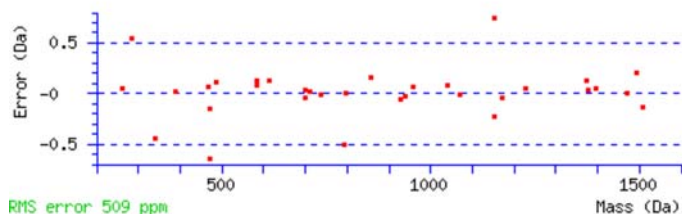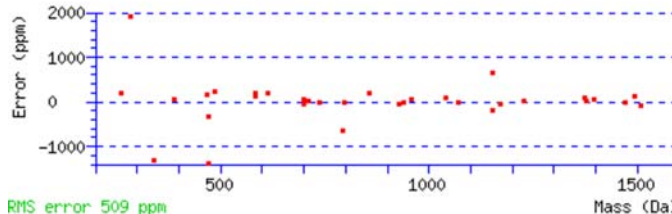

NCBI **BLAST** search of [ALPFWNEVIVPEIK](#)  
 (Parameters: blastp, nr protein database, expect=20000, no filter, PAM30)  
 Other BLAST [web gateways](#)

**All matches to this query**

| Score | Mr(calc): | Delta   | Sequence                         |
|-------|-----------|---------|----------------------------------|
| 70.4  | 1653.9130 | -0.3303 | <a href="#">ALPFWNEVIVPEIK</a>   |
| 13.3  | 1655.8591 | -2.2763 | <a href="#">GGKENVSLAEALNQAR</a> |
| 10.4  | 1653.9049 | -0.3222 | <a href="#">NLNQELQAQVKELK</a>   |
| 7.7   | 1654.7733 | -1.1906 | <a href="#">EKVEGGVECLDGAHR</a>  |
| 6.7   | 1655.8115 | -2.2287 | <a href="#">LISSLGSDDGEHASR</a>  |
| 6.2   | 1655.8016 | -2.2189 | <a href="#">GEQPSADSGAGIRHFK</a> |
| 5.9   | 1652.8192 | 0.7635  | <a href="#">LKGDALHQSPDCEIK</a>  |
| 5.7   | 1655.8096 | -2.2269 | <a href="#">SVAPQFSAFYAGFHK</a>  |
| 5.7   | 1653.8573 | -0.2746 | <a href="#">RSLEPESSDTPVLPK</a>  |
| 5.6   | 1653.8180 | -0.2353 | <a href="#">YMCEVMVLSLPELK</a>   |

Mascot: <http://www.matrixscience.com/>

# MASCOT SCIENCE Mascot Search Results

## Peptide View

MS/MS Fragmentation of **AMGIMNSFVNDIFER**

Found in **gi|41152402|ref|NP\_956411.1**, histone 2, H2, like [Danio rerio]

Match to Query 32288: 1742.392724 from(872.203638,2+) index(15278)

Data file TCDD\_0530.dta

Click mouse within plot area to zoom in by factor of two about that point

Or, Plot from  to  Da

Label all possible matches  Label matches used for scoring

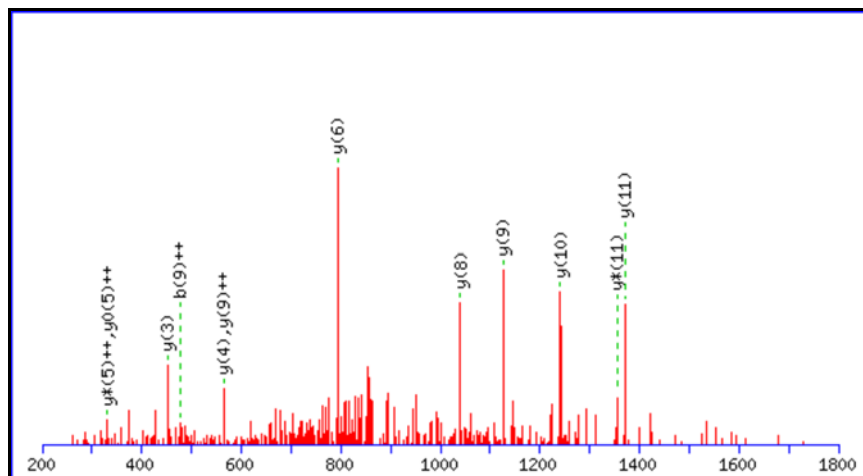

Monoisotopic mass of neutral peptide Mr(calc): 1742.8120

Ions Score: 43 Expect: 0.014

Matches : 12/144 fragment ions using 15 most intense peaks ([help](#))

| #  | b         | b <sup>++</sup> | b <sup>*</sup> | b <sup>+++</sup> | b <sup>0</sup> | b <sup>0++</sup> | Seq. | y                | y <sup>++</sup> | y <sup>*</sup>   | y <sup>+++</sup> | y <sup>0</sup> | y <sup>0++</sup> | #  |
|----|-----------|-----------------|----------------|------------------|----------------|------------------|------|------------------|-----------------|------------------|------------------|----------------|------------------|----|
| 1  | 72.0444   | 36.5258         |                |                  |                |                  | A    |                  |                 |                  |                  |                |                  | 15 |
| 2  | 203.0849  | 102.0461        |                |                  |                |                  | M    | 1672.7822        | 836.8947        | 1655.7556        | 828.3815         | 1654.7716      | 827.8894         | 14 |
| 3  | 260.1063  | 130.5568        |                |                  |                |                  | G    | 1541.7417        | 771.3745        | 1524.7151        | 762.8612         | 1523.7311      | 762.3692         | 13 |
| 4  | 373.1904  | 187.0988        |                |                  |                |                  | I    | 1484.7202        | 742.8638        | 1467.6937        | 734.3505         | 1466.7097      | 733.8585         | 12 |
| 5  | 504.2309  | 252.6191        |                |                  |                |                  | M    | <b>1371.6362</b> | 686.3217        | <b>1354.6096</b> | 677.8084         | 1353.6256      | 677.3164         | 11 |
| 6  | 618.2738  | 309.6405        | 601.2473       | 301.1273         |                |                  | N    | <b>1240.5957</b> | 620.8015        | 1223.5691        | 612.2882         | 1222.5851      | 611.7962         | 10 |
| 7  | 705.3058  | 353.1566        | 688.2793       | 344.6433         | 687.2953       | 344.1513         | S    | <b>1126.5527</b> | <b>563.7800</b> | 1109.5262        | 555.2667         | 1108.5422      | 554.7747         | 9  |
| 8  | 852.3743  | 426.6908        | 835.3477       | 418.1775         | 834.3637       | 417.6855         | F    | <b>1039.5207</b> | 520.2640        | 1022.4942        | 511.7507         | 1021.5102      | 511.2587         | 8  |
| 9  | 951.4427  | <b>476.2250</b> | 934.4161       | 467.7117         | 933.4321       | 467.2197         | V    | 892.4523         | 446.7298        | 875.4258         | 438.2165         | 874.4417       | 437.7245         | 7  |
| 10 | 1065.4856 | 533.2464        | 1048.4590      | 524.7332         | 1047.4750      | 524.2412         | N    | <b>793.3839</b>  | 397.1956        | 776.3573         | 388.6823         | 775.3733       | 388.1903         | 6  |
| 11 | 1180.5125 | 590.7599        | 1163.4860      | 582.2466         | 1162.5020      | 581.7546         | D    | 679.3410         | 340.1741        | 662.3144         | <b>331.6608</b>  | 661.3304       | <b>331.1688</b>  | 5  |
| 12 | 1293.5966 | 647.3019        | 1276.5701      | 638.7887         | 1275.5860      | 638.2967         | I    | <b>564.3140</b>  | 282.6606        | 547.2875         | 274.1474         | 546.3035       | 273.6554         | 4  |
| 13 | 1440.6650 | 720.8361        | 1423.6385      | 712.3229         | 1422.6545      | 711.8309         | F    | <b>451.2300</b>  | 226.1186        | 434.2034         | 217.6053         | 433.2194       | 217.1133         | 3  |
| 14 | 1569.7076 | 785.3574        | 1552.6811      | 776.8442         | 1551.6970      | 776.3522         | E    | 304.1615         | 152.5844        | 287.1350         | 144.0711         | 286.1510       | 143.5791         | 2  |
| 15 |           |                 |                |                  |                |                  | R    | 175.1190         | 88.0631         | 158.0924         | 79.5498          |                |                  | 1  |



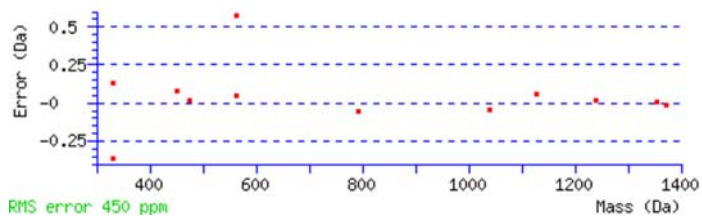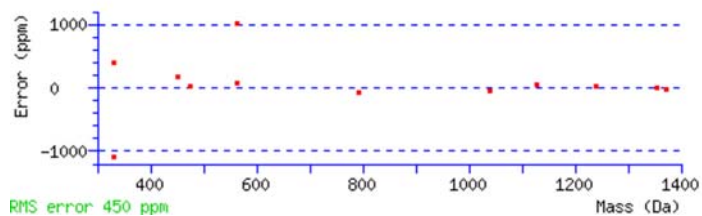

NCBI BLAST search of [AMGIMNSFVNDIFER](#)

(Parameters: blastp, nr protein database, expect=20000, no filter, PAM30)

Other BLAST [web gateways](#)

**All matches to this query**

| Score | Mr(calc): | Delta   | Sequence                           |
|-------|-----------|---------|------------------------------------|
| 42.6  | 1742.8120 | -0.4193 | <a href="#">AMGIMNSFVNDIFER</a>    |
| 4.6   | 1741.9574 | 0.4354  | <a href="#">GNLSLLEKAI ALESER</a>  |
| 4.5   | 1741.9032 | 0.4895  | <a href="#">SEASTSPDVPRIMKPK</a>   |
| 3.4   | 1740.8505 | 1.5422  | <a href="#">DNQTVFASYTLMVPR</a>    |
| 2.8   | 1743.8250 | -1.4323 | <a href="#">SSRCAIATYIDEPYR</a>    |
| 2.2   | 1739.9491 | 2.4436  | <a href="#">VTSTSLLMPSGAAPPLAK</a> |

Mascot: <http://www.matrixscience.com/>

**MASCOT SCIENCE** Mascot Search Results

**Peptide View**

MS/MS Fragmentation of **AQFGQPEILLGTIPGAGGTQR**

Found in **gi|52218912|ref|NP\_001004529.1|**, enoyl Coenzyme A hydratase, short chain, 1, mitochondrial [Danio rerio]

Match to Query 53789: 2111.362724 from(1056.688638,2+) index(253)

Data file TCDD\_0530.dta

Click mouse within plot area to zoom in by factor of two about that point

Or, Plot from  to  Da

Label all possible matches  Label matches used for scoring

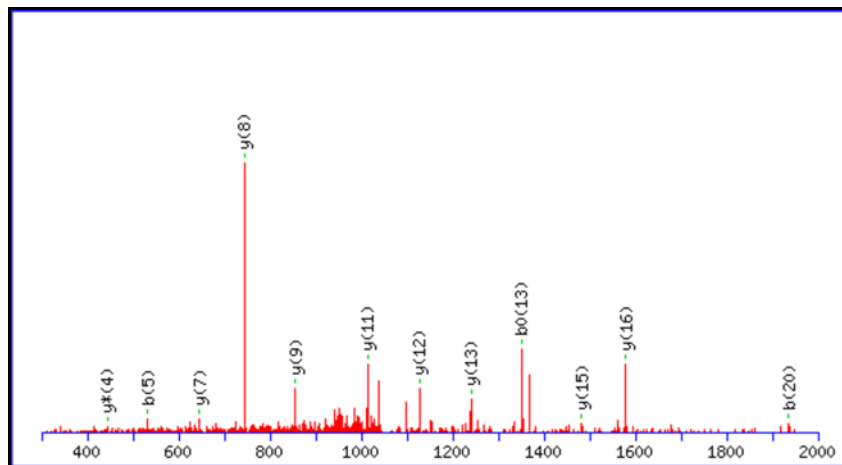

Monoisotopic mass of neutral peptide  $M_r(\text{calc})$ : 2110.1171

Ions Score: 53 Expect: 0.001

Matches : 12/222 fragment ions using 17 most intense peaks ([help](#))

| #  | b                | b <sup>++</sup> | b*        | b* <sup>++</sup> | b <sup>0</sup>   | b <sup>0++</sup> | Seq. | y                | y <sup>++</sup> | y*              | y* <sup>++</sup> | y <sup>0</sup> | y <sup>0++</sup> | #  |
|----|------------------|-----------------|-----------|------------------|------------------|------------------|------|------------------|-----------------|-----------------|------------------|----------------|------------------|----|
| 1  | 72.0444          | 36.5258         |           |                  |                  |                  | A    |                  |                 |                 |                  |                |                  | 21 |
| 2  | 200.1030         | 100.5551        | 183.0764  | 92.0418          |                  |                  | Q    | 2040.0873        | 1020.5473       | 2023.0607       | 1012.0340        | 2022.0767      | 1011.5420        | 20 |
| 3  | 347.1714         | 174.0893        | 330.1448  | 165.5761         |                  |                  | F    | 1912.0287        | 956.5180        | 1895.0021       | 948.0047         | 1894.0181      | 947.5127         | 19 |
| 4  | 404.1928         | 202.6001        | 387.1663  | 194.0868         |                  |                  | G    | 1764.9603        | 882.9838        | 1747.9337       | 874.4705         | 1746.9497      | 873.9785         | 18 |
| 5  | <b>532.2514</b>  | 266.6294        | 515.2249  | 258.1161         |                  |                  | Q    | 1707.9388        | 854.4730        | 1690.9123       | 845.9598         | 1689.9282      | 845.4678         | 17 |
| 6  | 629.3042         | 315.1557        | 612.2776  | 306.6425         |                  |                  | P    | <b>1579.8802</b> | 790.4438        | 1562.8537       | 781.9305         | 1561.8697      | 781.4385         | 16 |
| 7  | 758.3468         | 379.6770        | 741.3202  | 371.1638         | 740.3362         | 370.6717         | E    | <b>1482.8275</b> | 741.9174        | 1465.8009       | 733.4041         | 1464.8169      | 732.9121         | 15 |
| 8  | 871.4308         | 436.2191        | 854.4043  | 427.7058         | 853.4203         | 427.2138         | I    | 1353.7849        | 677.3961        | 1336.7583       | 668.8828         | 1335.7743      | 668.3908         | 14 |
| 9  | 984.5149         | 492.7611        | 967.4884  | 484.2478         | 966.5043         | 483.7558         | L    | <b>1240.7008</b> | 620.8540        | 1223.6743       | 612.3408         | 1222.6902      | 611.8488         | 13 |
| 10 | 1097.5990        | 549.3031        | 1080.5724 | 540.7899         | 1079.5884        | 540.2978         | L    | <b>1127.6167</b> | 564.3120        | 1110.5902       | 555.7987         | 1109.6062      | 555.3067         | 12 |
| 11 | 1154.6204        | 577.8139        | 1137.5939 | 569.3006         | 1136.6099        | 568.8086         | G    | <b>1014.5327</b> | 507.7700        | 997.5061        | 499.2567         | 996.5221       | 498.7647         | 11 |
| 12 | 1255.6681        | 628.3377        | 1238.6416 | 619.8244         | 1237.6576        | 619.3324         | T    | 957.5112         | 479.2592        | 940.4847        | 470.7460         | 939.5007       | 470.2540         | 10 |
| 13 | 1368.7522        | 684.8797        | 1351.7256 | 676.3665         | <b>1350.7416</b> | 675.8744         | I    | <b>856.4635</b>  | 428.7354        | 839.4370        | 420.2221         | 838.4530       | 419.7301         | 9  |
| 14 | 1465.8049        | 733.4061        | 1448.7784 | 724.8928         | 1447.7944        | 724.4008         | P    | <b>743.3795</b>  | 372.1934        | 726.3529        | 363.6801         | 725.3689       | 363.1881         | 8  |
| 15 | 1522.8264        | 761.9168        | 1505.7999 | 753.4036         | 1504.8158        | 752.9116         | G    | <b>646.3267</b>  | 323.6670        | 629.3002        | 315.1537         | 628.3161       | 314.6617         | 7  |
| 16 | 1593.8635        | 797.4354        | 1576.8370 | 788.9221         | 1575.8530        | 788.4301         | A    | 589.3053         | 295.1563        | 572.2787        | 286.6430         | 571.2947       | 286.1510         | 6  |
| 17 | 1650.8850        | 825.9461        | 1633.8584 | 817.4329         | 1632.8744        | 816.9408         | G    | 518.2681         | 259.6377        | 501.2416        | 251.1244         | 500.2576       | 250.6324         | 5  |
| 18 | 1707.9064        | 854.4569        | 1690.8799 | 845.9436         | 1689.8959        | 845.4516         | G    | 461.2467         | 231.1270        | <b>444.2201</b> | 222.6137         | 443.2361       | 222.1217         | 4  |
| 19 | 1808.9541        | 904.9807        | 1791.9276 | 896.4674         | 1790.9436        | 895.9754         | T    | 404.2252         | 202.6162        | 387.1987        | 194.1030         | 386.2146       | 193.6110         | 3  |
| 20 | <b>1937.0127</b> | 969.0100        | 1919.9862 | 960.4967         | 1919.0021        | 960.0047         | Q    | 303.1775         | 152.0924        | 286.1510        | 143.5791         |                |                  | 2  |
| 21 |                  |                 |           |                  |                  |                  | R    | 175.1190         | 88.0631         | 158.0924        | 79.5498          |                |                  | 1  |

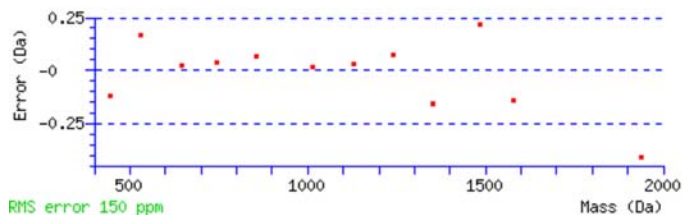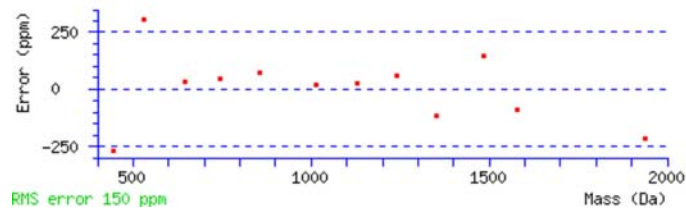

NCBI BLAST search of [AQFGQPEILLGTIPGAGGTQR](#)  
 (Parameters: blastp, nr protein database, expect=20000, no filter, PAM30)  
 Other BLAST [web gateways](#)

**All matches to this query**

| Score | Mr(calc): | Delta  | Sequence                              |
|-------|-----------|--------|---------------------------------------|
| 53.0  | 2110.1171 | 1.2456 | <a href="#">AQFGQPEILLGTIPGAGGTQR</a> |
| 13.5  | 2110.1211 | 1.2416 | <a href="#">GVSSWILRDLEFIYSGR</a>     |
| 10.1  | 2109.0087 | 2.3540 | <a href="#">SGTDTALPTSTHTPPQONTR</a>  |
| 7.0   | 2110.0957 | 1.2670 | <a href="#">MSRVLILCLLLSMSCCR</a>     |
| 6.7   | 2110.0957 | 1.2670 | <a href="#">MSRVLILCLLLSMSCCR</a>     |
| 6.4   | 2110.1245 | 1.2382 | <a href="#">ACFSATFKPTNSIRLIDVK</a>   |
| 5.8   | 2109.0967 | 2.2660 | <a href="#">YGNPTDAHTLLAIQQALR</a>    |
| 5.7   | 2109.0062 | 2.3566 | <a href="#">SGSVPCPGNGRYEFISLNR</a>   |
| 4.5   | 2109.8956 | 1.4671 | <a href="#">IDSCGHENDAGVICHDNVR</a>   |
| 3.8   | 2109.9288 | 1.4339 | <a href="#">ELCEFLSYWNGSSFICR</a>     |

Mascot: <http://www.matrixscience.com/>

# Mascot Search Results

## Peptide View

MS/MS Fragmentation of **DILLKDELEEIQAR**

Found in [gi|41055688|ref|NP\\_956483.1](#), diaphorase (NADH) (cytochrome b-5 reductase) [Danio rerio]

Match to Query 30979: 1683.882724 from(842.948638,2+) index(103312)

Data file TCDD\_0531.dta

Click mouse within plot area to zoom in by factor of two about that point

Or, Plot from  to  Da

Label all possible matches  Label matches used for scoring

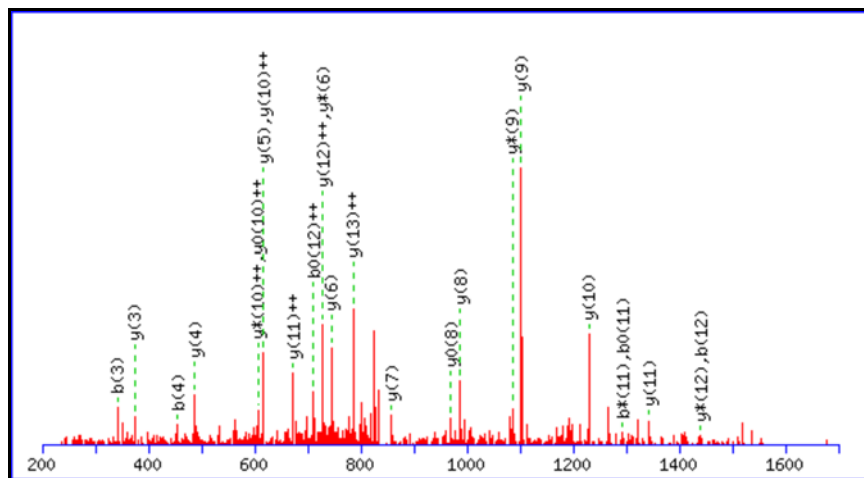

Monoisotopic mass of neutral peptide Mr(calc): 1683.9043

Ions Score: 48 Expect: 0.0037

Matches : 25/140 fragment ions using 43 most intense peaks ([help](#))

| #  | b                | b <sup>++</sup> | b <sup>*</sup>   | b <sup>***</sup> | b <sup>0</sup>   | b <sup>0++</sup> | Seq. | y                | y <sup>++</sup> | y <sup>*</sup> | y <sup>***</sup> | y <sup>0</sup> | y <sup>0++</sup> | #  |
|----|------------------|-----------------|------------------|------------------|------------------|------------------|------|------------------|-----------------|----------------|------------------|----------------|------------------|----|
| 1  | 116.0342         | 58.5207         |                  |                  | 98.0237          | 49.5155          | D    |                  |                 |                |                  |                |                  | 14 |
| 2  | 229.1183         | 115.0628        |                  |                  | 211.1077         | 106.0575         | I    | 1569.8846        | 785.4460        | 1552.8581      | 776.9327         | 1551.8741      | 776.4407         | 13 |
| 3  | <b>342.2023</b>  | 171.6048        |                  |                  | 324.1918         | 162.5995         | L    | 1456.8006        | 728.9039        | 1439.7740      | 720.3907         | 1438.7900      | 719.8986         | 12 |
| 4  | <b>455.2864</b>  | 228.1468        |                  |                  | 437.2758         | 219.1416         | L    | <b>1343.7165</b> | 672.3619        | 1326.6900      | 663.8486         | 1325.7060      | 663.3566         | 11 |
| 5  | 583.3814         | 292.1943        | 566.3548         | 283.6811         | 565.3708         | 283.1890         | K    | <b>1230.6325</b> | 615.8199        | 1213.6059      | 607.3066         | 1212.6219      | 606.8146         | 10 |
| 6  | 698.4083         | 349.7078        | 681.3818         | 341.1945         | 680.3978         | 340.7025         | D    | <b>1102.5375</b> | 551.7724        | 1085.5109      | 543.2591         | 1084.5269      | 542.7671         | 9  |
| 7  | 827.4509         | 414.2291        | 810.4244         | 405.7158         | 809.4403         | 405.2238         | E    | <b>987.5106</b>  | 494.2589        | 970.4840       | 485.7456         | 969.5000       | 485.2536         | 8  |
| 8  | 940.5350         | 470.7711        | 923.5084         | 462.2579         | 922.5244         | 461.7658         | L    | <b>858.4680</b>  | 429.7376        | 841.4414       | 421.2243         | 840.4574       | 420.7323         | 7  |
| 9  | 1069.5776        | 535.2924        | 1052.5510        | 526.7791         | 1051.5670        | 526.2871         | E    | <b>745.3839</b>  | 373.1956        | 728.3573       | 364.6823         | 727.3733       | 364.1903         | 6  |
| 10 | 1198.6202        | 599.8137        | 1181.5936        | 591.3004         | 1180.6096        | 590.8084         | E    | <b>616.3413</b>  | 308.6743        | 599.3148       | 300.1610         | 598.3307       | 299.6690         | 5  |
| 11 | 1311.7042        | 656.3558        | <b>1294.6777</b> | 647.8425         | <b>1293.6937</b> | 647.3505         | I    | <b>487.2987</b>  | 244.1530        | 470.2722       | 235.6397         |                |                  | 4  |
| 12 | <b>1439.7628</b> | 720.3850        | 1422.7363        | 711.8718         | 1421.7522        | 711.3798         | Q    | <b>374.2146</b>  | 187.6110        | 357.1881       | 179.0977         |                |                  | 3  |
| 13 | 1510.7999        | 755.9036        | 1493.7734        | 747.3903         | 1492.7894        | 746.8983         | A    | 246.1561         | 123.5817        | 229.1295       | 115.0684         |                |                  | 2  |
| 14 |                  |                 |                  |                  |                  |                  | R    | 175.1190         | 88.0631         | 158.0924       | 79.5498          |                |                  | 1  |

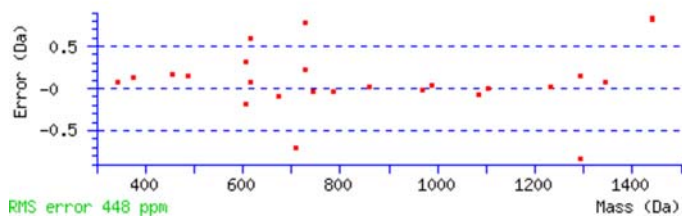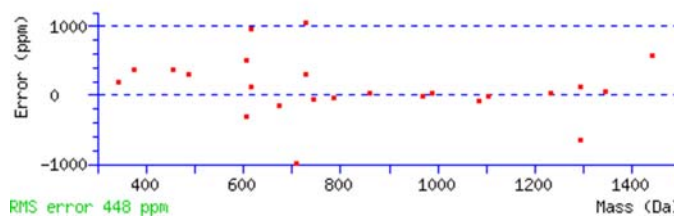

NCBI **BLAST** search of [DILLKDELEEEIQAR](#)

(Parameters: blastp, nr protein database, expect=20000, no filter, PAM30)

Other BLAST [web gateways](#)

**All matches to this query**

| Score | Mr(calc): | Delta   | Sequence                         |
|-------|-----------|---------|----------------------------------|
| 48.3  | 1683.9043 | -0.0215 | <a href="#">DILLKDELEEEIQAR</a>  |
| 14.5  | 1681.8531 | 2.0296  | <a href="#">KIMPETSAVYAMVSR</a>  |
| 12.1  | 1683.7174 | 0.1653  | <a href="#">GHFWAEDKMFCEK</a>    |
| 11.9  | 1685.8811 | -1.9983 | <a href="#">EDPLCPFKDALLLR</a>   |
| 11.6  | 1683.8791 | 0.0036  | <a href="#">NILNKPTVNEDSNVK</a>  |
| 10.5  | 1681.8563 | 2.0264  | <a href="#">FLTKALSPFDDSVDK</a>  |
| 10.2  | 1682.8740 | 1.0087  | <a href="#">NLNINVNLTSGYHPK</a>  |
| 9.1   | 1683.8315 | 0.0512  | <a href="#">DNAVSEAPSSSIVPPK</a> |
| 7.3   | 1681.8563 | 2.0264  | <a href="#">EDFGTFKELIEQVK</a>   |
| 6.8   | 1682.9032 | 0.9796  | <a href="#">ALPFWNEEIVPQIK</a>   |

Mascot: <http://www.matrixscience.com/>

# Mascot Search Results

## Peptide View

MS/MS Fragmentation of **DKPHLNIGTIGHVDHGK**

Found in **gi|61806580|ref|NP\_001013523.1|**, hypothetical protein LOC541378 [Danio rerio]

Match to Query 37212: 1838.502724 from(920.258638,2+) index(153564)

Data file TCDD\_0530.dta

Click mouse within plot area to zoom in by factor of two about that point

Or, Plot from  to  Da

Label all possible matches  Label matches used for scoring

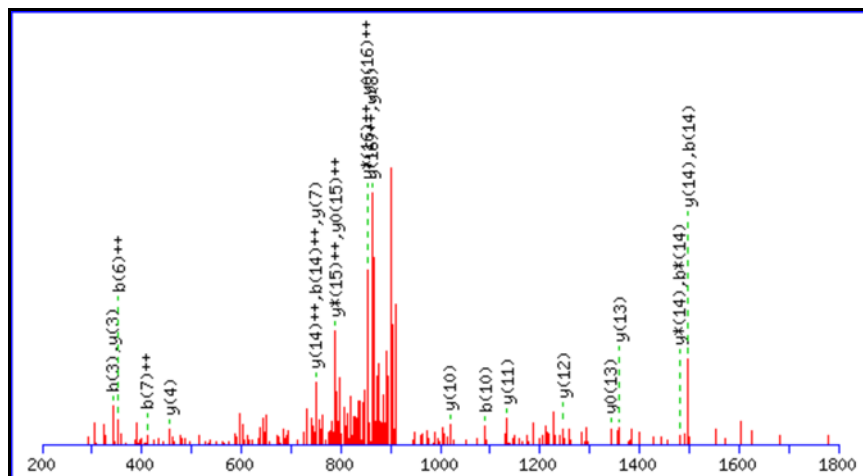

Monoisotopic mass of neutral peptide Mr(calc): 1836.9595

Ions Score: 44 Expect: 0.0095

Matches : 24/184 fragment ions using 43 most intense peaks ([help](#))

| #  | b                | b <sup>++</sup> | b <sup>*</sup>   | b <sup>*++</sup> | b <sup>0</sup> | b <sup>0++</sup> | Seq. | y                | y <sup>++</sup> | y <sup>*</sup>   | y <sup>*++</sup> | y <sup>0</sup>   | y <sup>0++</sup> | #  |
|----|------------------|-----------------|------------------|------------------|----------------|------------------|------|------------------|-----------------|------------------|------------------|------------------|------------------|----|
| 1  | 116.0342         | 58.5207         |                  |                  | 98.0237        | 49.5155          | D    |                  |                 |                  |                  |                  |                  | 17 |
| 2  | 244.1292         | 122.5682        | 227.1026         | 114.0550         | 226.1186       | 113.5629         | K    | 1722.9398        | 861.9735        | 1705.9133        | 853.4603         | 1704.9292        | 852.9683         | 16 |
| 3  | <b>341.1819</b>  | 171.0946        | 324.1554         | 162.5813         | 323.1714       | 162.0893         | P    | 1594.8449        | 797.9261        | 1577.8183        | 789.4128         | 1576.8343        | 788.9208         | 15 |
| 4  | 478.2409         | 239.6241        | 461.2143         | 231.1108         | 460.2303       | 230.6188         | H    | <b>1497.7921</b> | <b>749.3997</b> | <b>1480.7655</b> | 740.8864         | 1479.7815        | 740.3944         | 14 |
| 5  | 591.3249         | 296.1661        | 574.2984         | 287.6528         | 573.3144       | 287.1608         | L    | <b>1360.7332</b> | 680.8702        | 1343.7066        | 672.3570         | <b>1342.7226</b> | 671.8649         | 13 |
| 6  | 705.3678         | <b>353.1876</b> | 688.3413         | 344.6743         | 687.3573       | 344.1823         | N    | <b>1247.6491</b> | 624.3282        | 1230.6226        | 615.8149         | 1229.6385        | 615.3229         | 12 |
| 7  | 818.4519         | <b>409.7296</b> | 801.4254         | 401.2163         | 800.4413       | 400.7243         | I    | <b>1133.6062</b> | 567.3067        | 1116.5796        | 558.7935         | 1115.5956        | 558.3014         | 11 |
| 8  | 875.4734         | 438.2403        | 858.4468         | 429.7271         | 857.4628       | 429.2350         | G    | <b>1020.5221</b> | 510.7647        | 1003.4956        | 502.2514         | 1002.5116        | 501.7594         | 10 |
| 9  | 976.5211         | 488.7642        | 959.4945         | 480.2509         | 958.5105       | 479.7589         | T    | 963.5007         | 482.2540        | 946.4741         | 473.7407         | 945.4901         | 473.2487         | 9  |
| 10 | <b>1089.6051</b> | 545.3062        | 1072.5786        | 536.7929         | 1071.5946      | 536.3009         | I    | <b>862.4530</b>  | 431.7301        | 845.4264         | 423.2169         | 844.4424         | 422.7248         | 8  |
| 11 | 1146.6266        | 573.8169        | 1129.6000        | 565.3037         | 1128.6160      | 564.8116         | G    | <b>749.3689</b>  | 375.1881        | 732.3424         | 366.6748         | 731.3583         | 366.1828         | 7  |
| 12 | 1283.6855        | 642.3464        | 1266.6589        | 633.8331         | 1265.6749      | 633.3411         | H    | 692.3474         | 346.6774        | 675.3209         | 338.1641         | 674.3369         | 337.6721         | 6  |
| 13 | 1382.7539        | 691.8806        | 1365.7274        | 683.3673         | 1364.7433      | 682.8753         | V    | 555.2885         | 278.1479        | 538.2620         | 269.6346         | 537.2780         | 269.1426         | 5  |
| 14 | <b>1497.7809</b> | <b>749.3941</b> | <b>1480.7543</b> | 740.8808         | 1479.7703      | 740.3888         | D    | <b>456.2201</b>  | 228.6137        | 439.1936         | 220.1004         | 438.2096         | 219.6084         | 4  |
| 15 | 1634.8398        | 817.9235        | 1617.8132        | 809.4102         | 1616.8292      | 808.9182         | H    | <b>341.1932</b>  | 171.1002        | 324.1666         | 162.5870         |                  |                  | 3  |
| 16 | 1691.8612        | 846.4343        | 1674.8347        | 837.9210         | 1673.8507      | 837.4290         | G    | 204.1343         | 102.5708        | 187.1077         | 94.0575          |                  |                  | 2  |
| 17 |                  |                 |                  |                  |                |                  | K    | 147.1128         | 74.0600         | 130.0863         | 65.5468          |                  |                  | 1  |

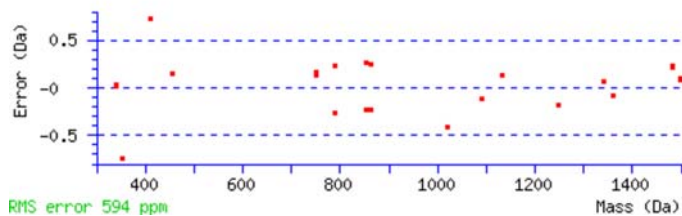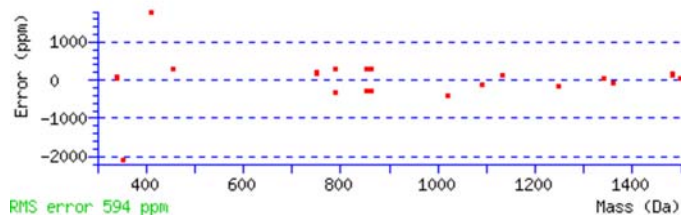

NCBI **BLAST** search of [DKPHLNIGTIGHVDHGK](#)  
 (Parameters: blastp, nr protein database, expect=20000, no filter, PAM30)  
 Other BLAST [web gateways](#)

**All matches to this query**

| Score | Mr(calc): | Delta  | Sequence                          |
|-------|-----------|--------|-----------------------------------|
| 43.9  | 1836.9595 | 1.5432 | <a href="#">DKPHLNIGTIGHVDHGK</a> |
| 7.3   | 1836.8685 | 1.6342 | <a href="#">IQVADWMKGQTCGLCGK</a> |
| 1.9   | 1836.9707 | 1.5320 | <a href="#">LNLEHGGHTRITAGPHK</a> |
| 0.0   | 1836.8069 | 1.6958 | <a href="#">IHSGEKPFTCSQCGMR</a>  |

Mascot: <http://www.matrixscience.com/>

# MASCOT SCIENCE Mascot Search Results

## Peptide View

MS/MS Fragmentation of **DLQSNVEHLTEK**

Found in [gi|189516256|ref|XP\\_689914.3](#), PREDICTED: similar to phosphofructokinase, platelet [Danio rerio]

Match to Query 20617: 1412.482724 from(707.248638,2+) index(21463)

Data file TCDD\_0530.dta

Click mouse within plot area to zoom in by factor of two about that point

Or, Plot from  to  Da

Label all possible matches  Label matches used for scoring

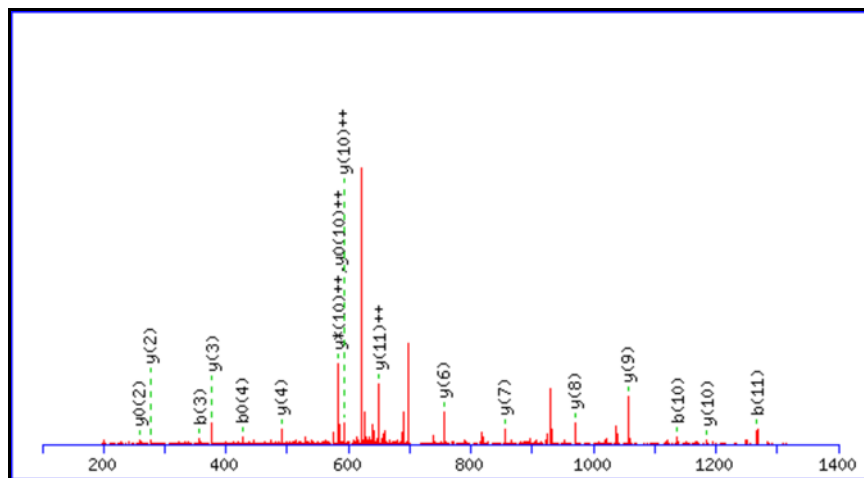

Monoisotopic mass of neutral peptide  $M_r(\text{calc})$ : 1411.6943

Ions Score: 59 Expect: 0.00035

Matches : 17/126 fragment ions using 24 most intense peaks ([help](#))

| #  | b         | b <sup>++</sup> | b <sup>*</sup> | b <sup>*++</sup> | b <sup>0</sup> | b <sup>0++</sup> | Seq. | y         | y <sup>++</sup> | y <sup>*</sup> | y <sup>*++</sup> | y <sup>0</sup> | y <sup>0++</sup> | #  |
|----|-----------|-----------------|----------------|------------------|----------------|------------------|------|-----------|-----------------|----------------|------------------|----------------|------------------|----|
| 1  | 116.0342  | 58.5207         |                |                  | 98.0237        | 49.5155          | D    |           |                 |                |                  |                |                  | 12 |
| 2  | 229.1183  | 115.0628        |                |                  | 211.1077       | 106.0575         | L    | 1297.6747 | 649.3410        | 1280.6481      | 640.8277         | 1279.6641      | 640.3357         | 11 |
| 3  | 357.1769  | 179.0921        | 340.1503       | 170.5788         | 339.1663       | 170.0868         | Q    | 1184.5906 | 592.7989        | 1167.5640      | 584.2857         | 1166.5800      | 583.7937         | 10 |
| 4  | 444.2089  | 222.6081        | 427.1823       | 214.0948         | 426.1983       | 213.6028         | S    | 1056.5320 | 528.7696        | 1039.5055      | 520.2564         | 1038.5214      | 519.7644         | 9  |
| 5  | 558.2518  | 279.6295        | 541.2253       | 271.1163         | 540.2413       | 270.6243         | N    | 969.5000  | 485.2536        | 952.4734       | 476.7404         | 951.4894       | 476.2483         | 8  |
| 6  | 657.3202  | 329.1638        | 640.2937       | 320.6505         | 639.3097       | 320.1585         | V    | 855.4571  | 428.2322        | 838.4305       | 419.7189         | 837.4465       | 419.2269         | 7  |
| 7  | 786.3628  | 393.6850        | 769.3363       | 385.1718         | 768.3523       | 384.6798         | E    | 756.3886  | 378.6980        | 739.3621       | 370.1847         | 738.3781       | 369.6927         | 6  |
| 8  | 923.4217  | 462.2145        | 906.3952       | 453.7012         | 905.4112       | 453.2092         | H    | 627.3461  | 314.1767        | 610.3195       | 305.6634         | 609.3355       | 305.1714         | 5  |
| 9  | 1036.5058 | 518.7565        | 1019.4792      | 510.2433         | 1018.4952      | 509.7513         | L    | 490.2871  | 245.6472        | 473.2606       | 237.1339         | 472.2766       | 236.6419         | 4  |
| 10 | 1137.5535 | 569.2804        | 1120.5269      | 560.7671         | 1119.5429      | 560.2751         | T    | 377.2031  | 189.1052        | 360.1765       | 180.5919         | 359.1925       | 180.0999         | 3  |
| 11 | 1266.5961 | 633.8017        | 1249.5695      | 625.2884         | 1248.5855      | 624.7964         | E    | 276.1554  | 138.5813        | 259.1288       | 130.0681         | 258.1448       | 129.5761         | 2  |
| 12 |           |                 |                |                  |                |                  | K    | 147.1128  | 74.0600         | 130.0863       | 65.5468          |                |                  | 1  |

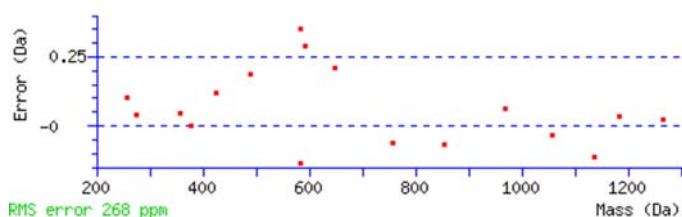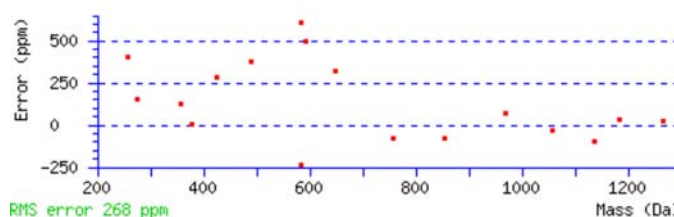

NCBI BLAST search of [DLQSNVEHLTEK](#)

(Parameters: blastp, nr protein database, expect=20000, no filter, PAM30)



Other BLAST [web gateways](#)

**All matches to this query**

| Score | Mr(calc): | Delta   | Sequence                       |
|-------|-----------|---------|--------------------------------|
| 59.1  | 1411.6943 | 0.7884  | <a href="#">DLQSNVEHLTEK</a>   |
| 21.8  | 1411.7558 | 0.7269  | <a href="#">DIKPENILLDDK</a>   |
| 17.2  | 1411.7823 | 0.7004  | <a href="#">QESHSEFIPLKVK</a>  |
| 16.9  | 1412.6671 | -0.1844 | <a href="#">KEVDYSDSLTEK</a>   |
| 14.4  | 1411.7671 | 0.7157  | <a href="#">DERIAAIGLPTEK</a>  |
| 13.5  | 1414.7779 | -2.2952 | <a href="#">ALSEALLSAKAAGR</a> |
| 12.3  | 1412.6792 | -0.1965 | <a href="#">MMNLTQNTSFK</a>    |
| 10.6  | 1411.8286 | 0.6541  | <a href="#">DLEDLQVLKVK</a>    |
| 9.6   | 1411.7055 | 0.7772  | <a href="#">LDQAKPTPANSR</a>   |
| 9.6   | 1412.7010 | -0.2183 | <a href="#">EFLKQFDEMVK</a>    |

**Mascot:** <http://www.matrixscience.com/>

**MASCOT SCIENCE** Mascot Search Results

**Peptide View**

MS/MS Fragmentation of **DVVVQHVNI E LGR**

Found in [gi|55925219|ref|NP\\_001007344.1](#), sorting and assembly machinery component 50 homolog, like [Danio rerio]

Match to Query 24230: 1535.242724 from(768.628638,2+) index(25671)

Data file TCDD\_0530.dta

Click mouse within plot area to zoom in by factor of two about that point

Or, Plot from  to  Da

Label all possible matches  Label matches used for scoring

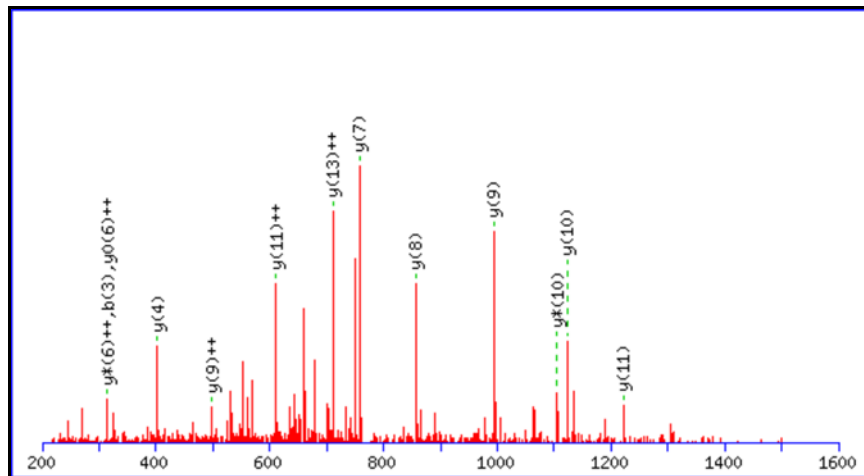

Monoisotopic mass of neutral peptide  $M_r(\text{calc})$ : 1533.8264

Ions Score: 47 Expect: 0.0056

Matches : 13/140 fragment ions using 13 most intense peaks ([help](#))

| #  | b         | b <sup>++</sup> | b*        | b <sup>+++</sup> | b <sup>0</sup> | b <sup>0++</sup> | Seq. | y         | y <sup>++</sup> | y*        | y <sup>+++</sup> | y <sup>0</sup> | y <sup>0++</sup> | #  |
|----|-----------|-----------------|-----------|------------------|----------------|------------------|------|-----------|-----------------|-----------|------------------|----------------|------------------|----|
| 1  | 116.0342  | 58.5207         |           |                  | 98.0237        | 49.5155          | D    |           |                 |           |                  |                |                  | 14 |
| 2  | 215.1026  | 108.0550        |           |                  | 197.0921       | 99.0497          | V    | 1419.8067 | 710.4070        | 1402.7801 | 701.8937         | 1401.7961      | 701.4017         | 13 |
| 3  | 314.1710  | 157.5892        |           |                  | 296.1605       | 148.5839         | V    | 1320.7383 | 660.8728        | 1303.7117 | 652.3595         | 1302.7277      | 651.8675         | 12 |
| 4  | 413.2395  | 207.1234        |           |                  | 395.2289       | 198.1181         | V    | 1221.6698 | 611.3386        | 1204.6433 | 602.8253         | 1203.6593      | 602.3333         | 11 |
| 5  | 541.2980  | 271.1527        | 524.2715  | 262.6394         | 523.2875       | 262.1474         | Q    | 1122.6014 | 561.8044        | 1105.5749 | 553.2911         | 1104.5909      | 552.7991         | 10 |
| 6  | 678.3570  | 339.6821        | 661.3304  | 331.1688         | 660.3464       | 330.6768         | H    | 994.5429  | 497.7751        | 977.5163  | 489.2618         | 976.5323       | 488.7698         | 9  |
| 7  | 777.4254  | 389.2163        | 760.3988  | 380.7030         | 759.4148       | 380.2110         | V    | 857.4839  | 429.2456        | 840.4574  | 420.7323         | 839.4734       | 420.2403         | 8  |
| 8  | 891.4683  | 446.2378        | 874.4417  | 437.7245         | 873.4577       | 437.2325         | N    | 758.4155  | 379.7114        | 741.3890  | 371.1981         | 740.4050       | 370.7061         | 7  |
| 9  | 1004.5524 | 502.7798        | 987.5258  | 494.2665         | 986.5418       | 493.7745         | I    | 644.3726  | 322.6899        | 627.3461  | 314.1767         | 626.3620       | 313.6847         | 6  |
| 10 | 1133.5949 | 567.3011        | 1116.5684 | 558.7878         | 1115.5844      | 558.2958         | E    | 531.2885  | 266.1479        | 514.2620  | 257.6346         | 513.2780       | 257.1426         | 5  |
| 11 | 1190.6164 | 595.8118        | 1173.5899 | 587.2986         | 1172.6058      | 586.8066         | G    | 402.2459  | 201.6266        | 385.2194  | 193.1133         |                |                  | 4  |
| 12 | 1303.7005 | 652.3539        | 1286.6739 | 643.8406         | 1285.6899      | 643.3486         | L    | 345.2245  | 173.1159        | 328.1979  | 164.6026         |                |                  | 3  |
| 13 | 1360.7219 | 680.8646        | 1343.6954 | 672.3513         | 1342.7114      | 671.8593         | G    | 232.1404  | 116.5738        | 215.1139  | 108.0606         |                |                  | 2  |
| 14 |           |                 |           |                  |                |                  | R    | 175.1190  | 88.0631         | 158.0924  | 79.5498          |                |                  | 1  |

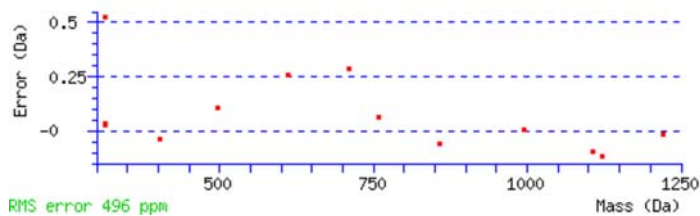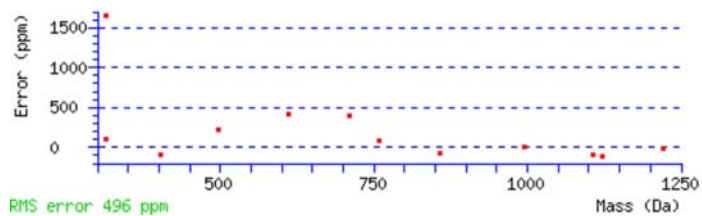

NCBI **BLAST** search of [DVVVQHVNIEGLGR](#)  
 (Parameters: blastp, nr protein database, expect=20000, no filter, PAM30)  
 Other BLAST [web gateways](#)

**All matches to this query**

| Score | Mr(calc): | Delta   | Sequence                         |
|-------|-----------|---------|----------------------------------|
| 46.8  | 1533.8264 | 1.4164  | <a href="#">DVVVQHVNIEGLGR</a>   |
| 14.4  | 1532.8021 | 2.4406  | <a href="#">IEAPQMSVEFVRK</a>    |
| 12.6  | 1533.8124 | 1.4303  | <a href="#">SRPALHTEPSGRAR</a>   |
| 12.6  | 1534.7337 | 0.5090  | <a href="#">CKGIEFDAIAPDEK</a>   |
| 11.4  | 1536.8009 | -1.5581 | <a href="#">GQKGEVGPGLAGSPGR</a> |
| 8.8   | 1536.8512 | -1.6084 | <a href="#">GKSEPQELGVPVVAK</a>  |
| 6.9   | 1533.6994 | 1.5433  | <a href="#">THSSGASPTPCHQK</a>   |
| 6.0   | 1533.7344 | 1.5083  | <a href="#">LVEAETTEEMINR</a>    |
| 4.7   | 1534.7562 | 0.4865  | <a href="#">MSSKPFTPEEARR</a>    |
| 4.4   | 1535.7579 | -0.5152 | <a href="#">KEQGGEEVIAYASR</a>   |

Mascot: <http://www.matrixscience.com/>

# MASCOT SCIENCE Mascot Search Results

## Peptide View

MS/MS Fragmentation of **EAFSLFDKDGDTITTK**

Found in [gi|189532998|ref|XP\\_001919221.1](#), PREDICTED: similar to calmodulin 2 [Danio rerio]

Match to Query 37670: 1845.342724 from(923.678638,2+) index(30592)

Data file TCDD\_0530.dta

Click mouse within plot area to zoom in by factor of two about that point

Or, Plot from  to  Da

Label all possible matches  Label matches used for scoring

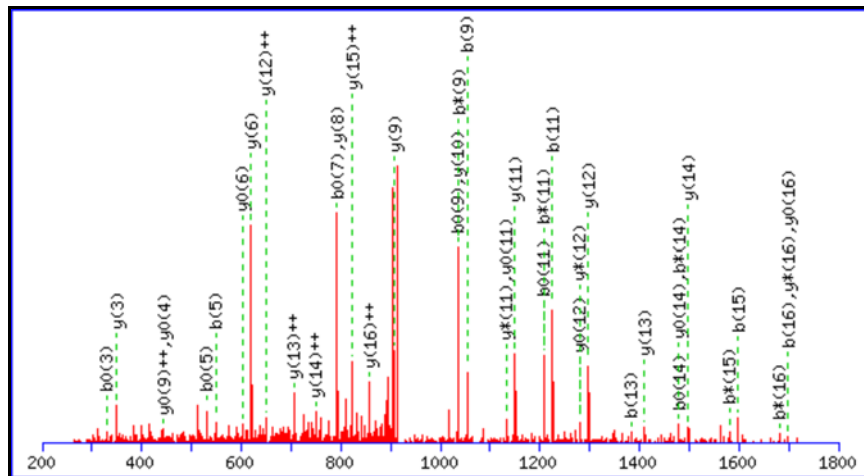

Monoisotopic mass of neutral peptide  $M_r(\text{calc})$ : 1843.8840

Ions Score: 54 Expect: 0.00095

Matches : 41/176 fragment ions using 60 most intense peaks ([help](#))

| #  | b         | b <sup>++</sup> | b <sup>*</sup> | b <sup>*++</sup> | b <sup>0</sup> | b <sup>0++</sup> | Seq. | y         | y <sup>++</sup> | y <sup>*</sup> | y <sup>*++</sup> | y <sup>0</sup> | y <sup>0++</sup> | #  |
|----|-----------|-----------------|----------------|------------------|----------------|------------------|------|-----------|-----------------|----------------|------------------|----------------|------------------|----|
| 1  | 130.0499  | 65.5286         |                |                  | 112.0393       | 56.5233          | E    |           |                 |                |                  |                |                  | 17 |
| 2  | 201.0870  | 101.0471        |                |                  | 183.0764       | 92.0418          | A    | 1715.8487 | 858.4280        | 1698.8221      | 849.9147         | 1697.8381      | 849.4227         | 16 |
| 3  | 348.1554  | 174.5813        |                |                  | 330.1448       | 165.5761         | F    | 1644.8115 | 822.9094        | 1627.7850      | 814.3961         | 1626.8010      | 813.9041         | 15 |
| 4  | 435.1874  | 218.0974        |                |                  | 417.1769       | 209.0921         | S    | 1497.7431 | 749.3752        | 1480.7166      | 740.8619         | 1479.7326      | 740.3699         | 14 |
| 5  | 548.2715  | 274.6394        |                |                  | 530.2609       | 265.6341         | L    | 1410.7111 | 705.8592        | 1393.6846      | 697.3459         | 1392.7005      | 696.8539         | 13 |
| 6  | 695.3399  | 348.1736        |                |                  | 677.3293       | 339.1683         | F    | 1297.6270 | 649.3172        | 1280.6005      | 640.8039         | 1279.6165      | 640.3119         | 12 |
| 7  | 810.3668  | 405.6871        |                |                  | 792.3563       | 396.6818         | D    | 1150.5586 | 575.7830        | 1133.5321      | 567.2697         | 1132.5481      | 566.7777         | 11 |
| 8  | 938.4618  | 469.7345        | 921.4353       | 461.2213         | 920.4512       | 460.7293         | K    | 1035.5317 | 518.2695        | 1018.5051      | 509.7562         | 1017.5211      | 509.2642         | 10 |
| 9  | 1053.4888 | 527.2480        | 1036.4622      | 518.7347         | 1035.4782      | 518.2427         | D    | 907.4367  | 454.2220        | 890.4102       | 445.7087         | 889.4262       | 445.2167         | 9  |
| 10 | 1110.5102 | 555.7587        | 1093.4837      | 547.2455         | 1092.4997      | 546.7535         | G    | 792.4098  | 396.7085        | 775.3832       | 388.1953         | 774.3992       | 387.7032         | 8  |
| 11 | 1225.5372 | 613.2722        | 1208.5106      | 604.7589         | 1207.5266      | 604.2669         | D    | 735.3883  | 368.1978        | 718.3618       | 359.6845         | 717.3777       | 359.1925         | 7  |
| 12 | 1282.5586 | 641.7829        | 1265.5321      | 633.2697         | 1264.5481      | 632.7777         | G    | 620.3614  | 310.6843        | 603.3348       | 302.1710         | 602.3508       | 301.6790         | 6  |
| 13 | 1383.6063 | 692.3068        | 1366.5798      | 683.7935         | 1365.5957      | 683.3015         | T    | 563.3399  | 282.1736        | 546.3134       | 273.6603         | 545.3293       | 273.1683         | 5  |
| 14 | 1496.6904 | 748.8488        | 1479.6638      | 740.3355         | 1478.6798      | 739.8435         | I    | 462.2922  | 231.6498        | 445.2657       | 223.1365         | 444.2817       | 222.6445         | 4  |
| 15 | 1597.7380 | 799.3727        | 1580.7115      | 790.8594         | 1579.7275      | 790.3674         | T    | 349.2082  | 175.1077        | 332.1816       | 166.5944         | 331.1976       | 166.1024         | 3  |
| 16 | 1698.7857 | 849.8965        | 1681.7592      | 841.3832         | 1680.7752      | 840.8912         | T    | 248.1605  | 124.5839        | 231.1339       | 116.0706         | 230.1499       | 115.5786         | 2  |
| 17 |           |                 |                |                  |                |                  | K    | 147.1128  | 74.0600         | 130.0863       | 65.5468          |                |                  | 1  |

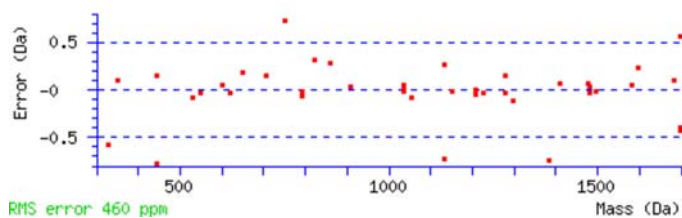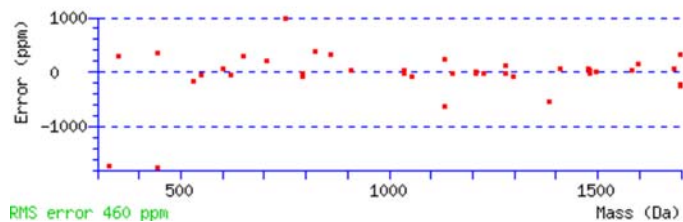

NCBI BLAST search of [EAFSLFDKDGDTITTK](#)  
 (Parameters: blastp, nr protein database, expect=20000, no filter, PAM30)  
 Other BLAST [web gateways](#)

**All matches to this query**

| Score | Mr(calc): | Delta   | Sequence                          |
|-------|-----------|---------|-----------------------------------|
| 53.9  | 1843.8840 | 1.4587  | <a href="#">EAFSLFDKDGDTITTK</a>  |
| 13.9  | 1843.9176 | 1.4251  | <a href="#">QAIQSNALNNDKWSAGK</a> |
| 7.9   | 1842.9087 | 2.4341  | <a href="#">HNFICKYEPESHLVK</a>   |
| 7.3   | 1844.0601 | 1.2827  | <a href="#">KFIFTGVFVGGVYLLGK</a> |
| 7.0   | 1844.8462 | 0.4965  | <a href="#">SLQLSDSGVYQCTSTEK</a> |
| 6.4   | 1844.8792 | 0.4635  | <a href="#">QFQSTIPSSSYPTSTK</a>  |
| 5.4   | 1843.7869 | 1.5558  | <a href="#">YWAQKDMESGQVCDK</a>   |
| 4.6   | 1845.8390 | -0.4962 | <a href="#">FSTECQDLISQCFIR</a>   |
| 3.5   | 1844.7896 | 0.5532  | <a href="#">CSTKFPDCNCPFADIK</a>  |
| 3.4   | 1843.8887 | 1.4541  | <a href="#">TYGPECDIVLDAHRK</a>   |

**Mascot:** <http://www.matrixscience.com/>

# MASCOT SCIENCE Mascot Search Results

## Peptide View

MS/MS Fragmentation of **EFLLGFLQPVIEIGDVPFRPR**

Found in [gi|41055708|ref|NP\\_956866.1](#), proteasome (prosome, macropain) 26S subunit, non-ATPase, 3 [Danio rerio]

Match to Query 103669: 2587.792724 from(1294.903638,2+) index(28699)

Data file TCDD\_0531.dta

Click mouse within plot area to zoom in by factor of two about that point

Or, Plot from  to  Da

Label all possible matches  Label matches used for scoring

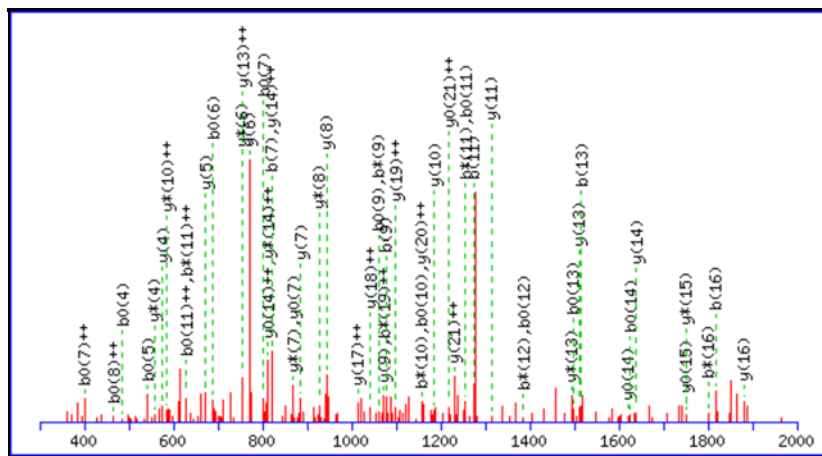

Monoisotopic mass of neutral peptide Mr(calc): 2586.3482

Ions Score: 41 Expect: 0.011

Matches : 56/224 fragment ions using 117 most intense peaks ([help](#))

| #  | b         | b <sup>++</sup> | b*        | b <sup>*++</sup> | b <sup>0</sup> | b <sup>0++</sup> | Seq. | y         | y <sup>++</sup> | y*        | y <sup>*++</sup> | y <sup>0</sup> | y <sup>0++</sup> | #  |
|----|-----------|-----------------|-----------|------------------|----------------|------------------|------|-----------|-----------------|-----------|------------------|----------------|------------------|----|
| 1  | 130.0499  | 65.5286         |           |                  | 112.0393       | 56.5233          | E    |           |                 |           |                  |                |                  | 22 |
| 2  | 277.1183  | 139.0628        |           |                  | 259.1077       | 130.0575         | F    | 2458.3129 | 1229.6601       | 2441.2864 | 1221.1468        | 2440.3023      | 1220.6548        | 21 |
| 3  | 390.2023  | 195.6048        |           |                  | 372.1918       | 186.5995         | L    | 2311.2445 | 1156.1259       | 2294.2179 | 1147.6126        | 2293.2339      | 1147.1206        | 20 |
| 4  | 503.2864  | 252.1468        |           |                  | 485.2758       | 243.1416         | L    | 2198.1604 | 1099.5839       | 2181.1339 | 1091.0706        | 2180.1499      | 1090.5786        | 19 |
| 5  | 560.3079  | 280.6576        |           |                  | 542.2973       | 271.6523         | G    | 2085.0764 | 1043.0418       | 2068.0498 | 1034.5285        | 2067.0658      | 1034.0365        | 18 |
| 6  | 707.3763  | 354.1918        |           |                  | 689.3657       | 345.1865         | F    | 2028.0549 | 1014.5311       | 2011.0284 | 1006.0178        | 2010.0443      | 1005.5258        | 17 |
| 7  | 820.4604  | 410.7338        |           |                  | 802.4498       | 401.7285         | L    | 1880.9865 | 940.9969        | 1863.9599 | 932.4836         | 1862.9759      | 931.9916         | 16 |
| 8  | 949.5029  | 475.2551        |           |                  | 931.4924       | 466.2498         | E    | 1767.9024 | 884.4549        | 1750.8759 | 875.9416         | 1749.8919      | 875.4496         | 15 |
| 9  | 1077.5615 | 539.2844        | 1060.5350 | 530.7711         | 1059.5510      | 530.2791         | Q    | 1638.8598 | 819.9336        | 1621.8333 | 811.4203         | 1620.8493      | 810.9283         | 14 |
| 10 | 1174.6143 | 587.8108        | 1157.5877 | 579.2975         | 1156.6037      | 578.8055         | P    | 1510.8013 | 755.9043        | 1493.7747 | 747.3910         | 1492.7907      | 746.8990         | 13 |
| 11 | 1273.6827 | 637.3450        | 1256.6562 | 628.8317         | 1255.6721      | 628.3397         | V    | 1413.7485 | 707.3779        | 1396.7219 | 698.8646         | 1395.7379      | 698.3726         | 12 |
| 12 | 1402.7253 | 701.8663        | 1385.6987 | 693.3530         | 1384.7147      | 692.8610         | E    | 1314.6801 | 657.8437        | 1297.6535 | 649.3304         | 1296.6695      | 648.8384         | 11 |
| 13 | 1515.8094 | 758.4083        | 1498.7828 | 749.8950         | 1497.7988      | 749.4030         | I    | 1185.6375 | 593.3224        | 1168.6109 | 584.8091         | 1167.6269      | 584.3171         | 10 |
| 14 | 1644.8520 | 822.9296        | 1627.8254 | 814.4163         | 1626.8414      | 813.9243         | E    | 1072.5534 | 536.7803        | 1055.5269 | 528.2671         | 1054.5429      | 527.7751         | 9  |
| 15 | 1701.8734 | 851.4403        | 1684.8469 | 842.9271         | 1683.8629      | 842.4351         | G    | 943.5108  | 472.2591        | 926.4843  | 463.7458         | 925.5003       | 463.2538         | 8  |
| 16 | 1816.9004 | 908.9538        | 1799.8738 | 900.4405         | 1798.8898      | 899.9485         | D    | 886.4894  | 443.7483        | 869.4628  | 435.2350         | 868.4788       | 434.7430         | 7  |
| 17 | 1915.9688 | 958.4880        | 1898.9422 | 949.9747         | 1897.9582      | 949.4827         | V    | 771.4624  | 386.2348        | 754.4359  | 377.7216         |                |                  | 6  |
| 18 | 2013.0215 | 1007.0144       | 1995.9950 | 998.5011         | 1995.0110      | 998.0091         | P    | 672.3940  | 336.7006        | 655.3675  | 328.1874         |                |                  | 5  |
| 19 | 2160.0900 | 1080.5486       | 2143.0634 | 1072.0353        | 2142.0794      | 1071.5433        | F    | 575.3412  | 288.1743        | 558.3147  | 279.6610         |                |                  | 4  |
| 20 | 2316.1911 | 1158.5992       | 2299.1645 | 1150.0859        | 2298.1805      | 1149.5939        | R    | 428.2728  | 214.6401        | 411.2463  | 206.1268         |                |                  | 3  |
| 21 | 2413.2438 | 1207.1256       | 2396.2173 | 1198.6123        | 2395.2333      | 1198.1203        | P    | 272.1717  | 136.5895        | 255.1452  | 128.0762         |                |                  | 2  |
| 22 |           |                 |           |                  |                |                  | R    | 175.1190  | 88.0631         | 158.0924  | 79.5498          |                |                  | 1  |

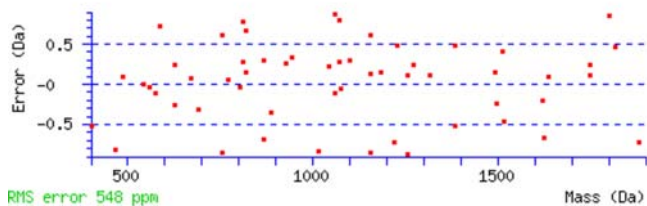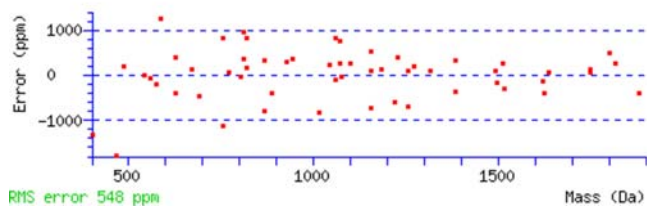

NCBI BLAST search of [EFLGFLQVPVEIEGDVPRPR](#)  
 (Parameters: blastp, nr protein database, expect=20000, no filter, PAM30)  
 Other BLAST [web gateways](#)

**All matches to this query**

| Score | Mr(calc): | Delta   | Sequence                                  |
|-------|-----------|---------|-------------------------------------------|
| 41.3  | 2586.3482 | 1.4445  | <a href="#">EFLGFLQVPVEIEGDVPRPR</a>      |
| 7.3   | 2586.2171 | 1.5757  | <a href="#">DGNNDNRNQLQAANEASTLGWGTR</a>  |
| 6.2   | 2586.3047 | 1.4881  | <a href="#">VPADCVLGEVGGGFKVAMNILNNGR</a> |
| 5.4   | 2589.1368 | -1.3440 | <a href="#">GYSHNIGTNQAVNSDYKNSDYDK</a>   |
| 4.9   | 2586.2723 | 1.5205  | <a href="#">LSALLMAAGADPHKENCEPLFFR</a>   |
| 4.3   | 2588.2826 | -0.4899 | <a href="#">LQKLASLDVDCAVLDCEDGVALNK</a>  |
| 3.8   | 2587.2588 | 0.5339  | <a href="#">NIFLTDSGTVKVGDFGSACSLNSAK</a> |
| 3.3   | 2588.3003 | -0.5076 | <a href="#">EDGELKELEVNGDITTMVLTNLR</a>   |
| 3.0   | 2587.2642 | 0.5286  | <a href="#">TVHYCLTNNKHFSFANALPEK</a>     |
| 2.4   | 2585.4078 | 2.3849  | <a href="#">KQIATQTNLTLLQVNNWFINAR</a>    |

Mascot: <http://www.matrixscience.com/>

# MASCOT SCIENCE Mascot Search Results

## Peptide View

MS/MS Fragmentation of **EKGDPWFQIPTDK**

Found in [gi157743314|ref|NP\\_001099066.1](#), NADH dehydrogenase (ubiquinone) 1 beta subcomplex 5 [Danio rerio]

Match to Query 31312: 1730.332724 from(866.173638,2+) index(34002)

Data file TCDD\_0530.dta

Click mouse within plot area to zoom in by factor of two about that point

Or, Plot from  to  Da

Label all possible matches  Label matches used for scoring

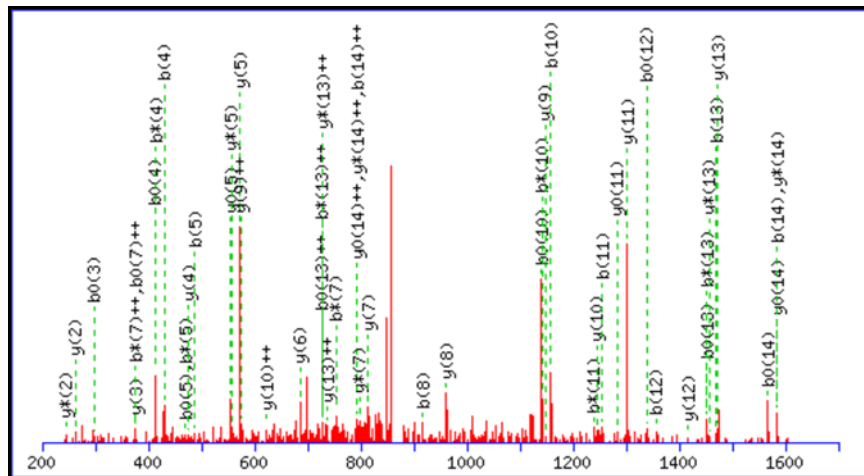

Monoisotopic mass of neutral peptide Mr(calc): 1729.8675

Ions Score: 46 Expect: 0.006

Matches : 52/164 fragment ions using 140 most intense peaks [\(help\)](#)

| #  | b         | b <sup>++</sup> | b <sup>*</sup> | b <sup>*++</sup> | b <sup>0</sup> | b <sup>0++</sup> | Seq. | y         | y <sup>++</sup> | y <sup>*</sup> | y <sup>*++</sup> | y <sup>0</sup> | y <sup>0++</sup> | #  |
|----|-----------|-----------------|----------------|------------------|----------------|------------------|------|-----------|-----------------|----------------|------------------|----------------|------------------|----|
| 1  | 130.0499  | 65.5286         |                |                  | 112.0393       | 56.5233          | E    |           |                 |                |                  |                |                  | 15 |
| 2  | 258.1448  | 129.5761        | 241.1183       | 121.0628         | 240.1343       | 120.5708         | K    | 1601.8322 | 801.4197        | 1584.8057      | 792.9065         | 1583.8217      | 792.4145         | 14 |
| 3  | 315.1663  | 158.0868        | 298.1397       | 149.5735         | 297.1557       | 149.0815         | G    | 1473.7373 | 737.3723        | 1456.7107      | 728.8590         | 1455.7267      | 728.3670         | 13 |
| 4  | 430.1932  | 215.6003        | 413.1667       | 207.0870         | 412.1827       | 206.5950         | D    | 1416.7158 | 708.8615        | 1399.6892      | 700.3483         | 1398.7052      | 699.8563         | 12 |
| 5  | 487.2147  | 244.1110        | 470.1882       | 235.5977         | 469.2041       | 235.1057         | G    | 1301.6889 | 651.3481        | 1284.6623      | 642.8348         | 1283.6783      | 642.3428         | 11 |
| 6  | 584.2675  | 292.6374        | 567.2409       | 284.1241         | 566.2569       | 283.6321         | P    | 1244.6674 | 622.8373        | 1227.6408      | 614.3241         | 1226.6568      | 613.8320         | 10 |
| 7  | 770.3468  | 385.6770        | 753.3202       | 377.1638         | 752.3362       | 376.6717         | W    | 1147.6146 | 574.3109        | 1130.5881      | 565.7977         | 1129.6041      | 565.3057         | 9  |
| 8  | 917.4152  | 459.2112        | 900.3886       | 450.6980         | 899.4046       | 450.2060         | F    | 961.5353  | 481.2713        | 944.5088       | 472.7580         | 943.5247       | 472.2660         | 8  |
| 9  | 1045.4738 | 523.2405        | 1028.4472      | 514.7272         | 1027.4632      | 514.2352         | Q    | 814.4669  | 407.7371        | 797.4403       | 399.2238         | 796.4563       | 398.7318         | 7  |
| 10 | 1158.5578 | 579.7826        | 1141.5313      | 571.2693         | 1140.5473      | 570.7773         | I    | 686.4083  | 343.7078        | 669.3818       | 335.1945         | 668.3978       | 334.7025         | 6  |
| 11 | 1255.6106 | 628.3089        | 1238.5841      | 619.7957         | 1237.6000      | 619.3037         | P    | 573.3243  | 287.1658        | 556.2977       | 278.6525         | 555.3137       | 278.1605         | 5  |
| 12 | 1356.6583 | 678.8328        | 1339.6317      | 670.3195         | 1338.6477      | 669.8275         | T    | 476.2715  | 238.6394        | 459.2449       | 230.1261         | 458.2609       | 229.6341         | 4  |
| 13 | 1469.7423 | 735.3748        | 1452.7158      | 726.8615         | 1451.7318      | 726.3695         | I    | 375.2238  | 188.1155        | 358.1973       | 179.6023         | 357.2132       | 179.1103         | 3  |
| 14 | 1584.7693 | 792.8883        | 1567.7427      | 784.3750         | 1566.7587      | 783.8830         | D    | 262.1397  | 131.5735        | 245.1132       | 123.0602         | 244.1292       | 122.5682         | 2  |
| 15 |           |                 |                |                  |                |                  | K    | 147.1128  | 74.0600         | 130.0863       | 65.5468          |                |                  | 1  |



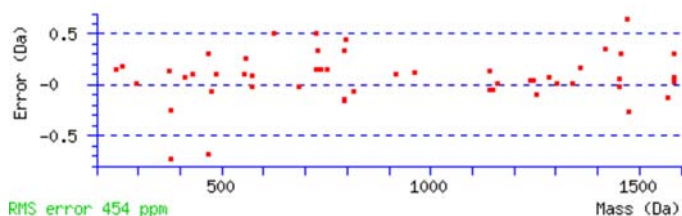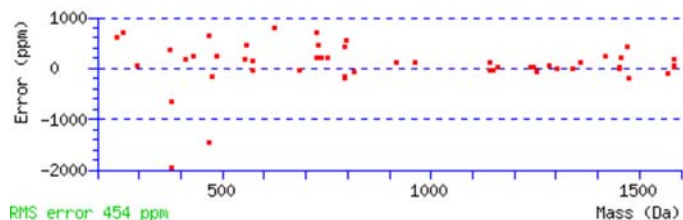

NCBI BLAST search of [EKGDGPWFQIPTIDK](#)

(Parameters: blastp, nr protein database, expect=20000, no filter, PAM30)

Other BLAST [web gateways](#)

**All matches to this query**

| Score | Mr(calc): | Delta  | Sequence                            |
|-------|-----------|--------|-------------------------------------|
| 46.2  | 1729.8675 | 0.4652 | <a href="#">EKGDGPWFQIPTIDK</a>     |
| 8.8   | 1729.8846 | 0.4481 | <a href="#">SGKSEEAVLLQGVNGDK</a>   |
| 7.7   | 1728.9046 | 1.4281 | <a href="#">VYSQLEHAETVVNIK</a>     |
| 7.2   | 1729.8482 | 0.4845 | <a href="#">DAENLINTAREELDK</a>     |
| 6.1   | 1728.9087 | 1.4240 | <a href="#">TYPPLPDIFLDSVPR</a>     |
| 5.7   | 1728.9622 | 1.3706 | <a href="#">LDEKTVIITGANTGIGK</a>   |
| 5.4   | 1729.8271 | 0.5056 | <a href="#">GDQGSIGYPGSPGKPGKEK</a> |
| 5.3   | 1729.9396 | 0.3931 | <a href="#">TSPQTLNLCLKINAK</a>     |
| 5.2   | 1728.7737 | 1.5590 | <a href="#">EPPAAACPETVGAQNSR</a>   |
| 4.5   | 1727.9669 | 2.3659 | <a href="#">DESKIIQLSETKPLK</a>     |

Mascot: <http://www.matrixscience.com/>

# MASCOT SCIENCE Mascot Search Results

## Peptide View

MS/MS Fragmentation of **ELESIEVDSIEVENASK**

Found in [gi|47086623|ref|NP\\_997873.1](#), monocarboxylate transporter 4 [Danio rerio]

Match to Query 40788: 1891.422724 from(946.718638,2+) index(9247)

Data file TCDD\_0530.dta

Click mouse within plot area to zoom in by factor of two about that point

Or, Plot from  to  Da

Label all possible matches  Label matches used for scoring

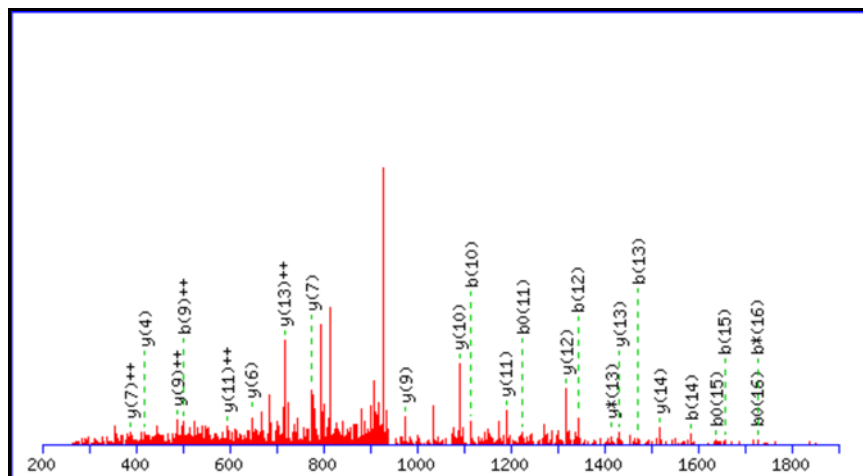

Monoisotopic mass of neutral peptide Mr(calc): 1889.9105

Ions Score: 46 Expect: 0.0051

Matches : 24/164 fragment ions using 47 most intense peaks ([help](#))

| #  | b                | b <sup>++</sup> | b <sup>*</sup>   | b <sup>*++</sup> | b <sup>0</sup>   | b <sup>0++</sup> | Seq. | y                | y <sup>++</sup> | y <sup>*</sup>   | y <sup>*++</sup> | y <sup>0</sup> | y <sup>0++</sup> | #  |
|----|------------------|-----------------|------------------|------------------|------------------|------------------|------|------------------|-----------------|------------------|------------------|----------------|------------------|----|
| 1  | 130.0499         | 65.5286         |                  |                  | 112.0393         | 56.5233          | E    |                  |                 |                  |                  |                |                  | 17 |
| 2  | 243.1339         | 122.0706        |                  |                  | 225.1234         | 113.0653         | L    | 1761.8753        | 881.4413        | 1744.8487        | 872.9280         | 1743.8647      | 872.4360         | 16 |
| 3  | 372.1765         | 186.5919        |                  |                  | 354.1660         | 177.5866         | E    | 1648.7912        | 824.8992        | 1631.7647        | 816.3860         | 1630.7806      | 815.8940         | 15 |
| 4  | 459.2086         | 230.1079        |                  |                  | 441.1980         | 221.1026         | S    | <b>1519.7486</b> | 760.3779        | 1502.7221        | 751.8647         | 1501.7380      | 751.3727         | 14 |
| 5  | 572.2926         | 286.6499        |                  |                  | 554.2821         | 277.6447         | I    | <b>1432.7166</b> | <b>716.8619</b> | <b>1415.6900</b> | 708.3487         | 1414.7060      | 707.8566         | 13 |
| 6  | 701.3352         | 351.1712        |                  |                  | 683.3246         | 342.1660         | E    | <b>1319.6325</b> | 660.3199        | 1302.6060        | 651.8066         | 1301.6220      | 651.3146         | 12 |
| 7  | 800.4036         | 400.7055        |                  |                  | 782.3931         | 391.7002         | V    | <b>1190.5899</b> | <b>595.7986</b> | 1173.5634        | 587.2853         | 1172.5794      | 586.7933         | 11 |
| 8  | 915.4306         | 458.2189        |                  |                  | 897.4200         | 449.2136         | D    | <b>1091.5215</b> | 546.2644        | 1074.4950        | 537.7511         | 1073.5109      | 537.2591         | 10 |
| 9  | 1002.4626        | <b>501.7349</b> |                  |                  | 984.4520         | 492.7297         | S    | <b>976.4946</b>  | <b>488.7509</b> | 959.4680         | 480.2376         | 958.4840       | 479.7456         | 9  |
| 10 | <b>1115.5467</b> | 558.2770        |                  |                  | 1097.5361        | 549.2717         | I    | 889.4625         | 445.2349        | 872.4360         | 436.7216         | 871.4520       | 436.2296         | 8  |
| 11 | 1244.5893        | 622.7983        |                  |                  | <b>1226.5787</b> | 613.7930         | E    | <b>776.3785</b>  | <b>388.6929</b> | 759.3519         | 380.1796         | 758.3679       | 379.6876         | 7  |
| 12 | <b>1343.6577</b> | 672.3325        |                  |                  | 1325.6471        | 663.3272         | V    | <b>647.3359</b>  | 324.1716        | 630.3093         | 315.6583         | 629.3253       | 315.1663         | 6  |
| 13 | <b>1472.7003</b> | 736.8538        |                  |                  | 1454.6897        | 727.8485         | E    | 548.2675         | 274.6374        | 531.2409         | 266.1241         | 530.2569       | 265.6321         | 5  |
| 14 | <b>1586.7432</b> | 793.8752        | 1569.7166        | 785.3620         | 1568.7326        | 784.8699         | N    | <b>419.2249</b>  | 210.1161        | 402.1983         | 201.6028         | 401.2143       | 201.1108         | 4  |
| 15 | <b>1657.7803</b> | 829.3938        | 1640.7538        | 820.8805         | <b>1639.7697</b> | 820.3885         | A    | 305.1819         | 153.0946        | 288.1554         | 144.5813         | 287.1714       | 144.0893         | 3  |
| 16 | 1744.8123        | 872.9098        | <b>1727.7858</b> | 864.3965         | <b>1726.8018</b> | 863.9045         | S    | 234.1448         | 117.5761        | 217.1183         | 109.0628         | 216.1343       | 108.5708         | 2  |
| 17 |                  |                 |                  |                  |                  |                  | K    | 147.1128         | 74.0600         | 130.0863         | 65.5468          |                |                  | 1  |

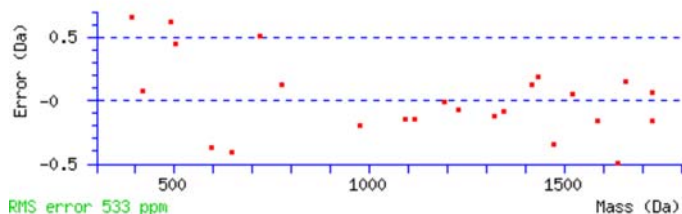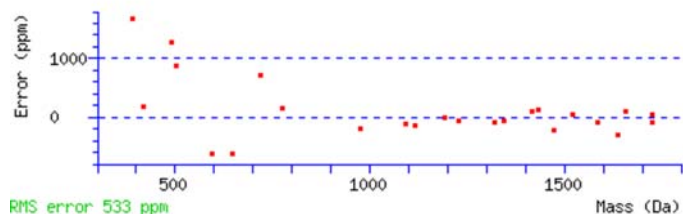

NCBI **BLAST** search of [ELESIEVDSIEVENASK](#)  
 (Parameters: blastp, nr protein database, expect=20000, no filter, PAM30)  
 Other BLAST [web gateways](#)

**All matches to this query**

| Score | Mr(calc): | Delta   | Sequence                          |
|-------|-----------|---------|-----------------------------------|
| 46.5  | 1889.9105 | 1.5122  | <a href="#">ELESIEVDSIEVENASK</a> |
| 5.7   | 1888.9676 | 2.4551  | <a href="#">LQESNARLCVDVSQLK</a>  |
| 2.5   | 1890.8993 | 0.5234  | <a href="#">SKLDGSNLLGMLDEDER</a> |
| 2.1   | 1890.9938 | 0.4289  | <a href="#">ETEBILADTLKVEVFR</a>  |
| 0.5   | 1888.9894 | 2.4333  | <a href="#">QIFEEEEIRELQSIK</a>   |
| 0.4   | 1891.8006 | -0.3779 | <a href="#">EYERSEDGMNSYASVR</a>  |

**Mascot:** <http://www.matrixscience.com/>

**MASCOT** SCIENCE **Mascot Search Results**

**Peptide View**

MS/MS Fragmentation of **FDRPGQLHVGFGALHAFEK**

Found in [gi|47085781|ref|NP\\_998227.1](#), ubiquitin-like modifier activating enzyme 1 [Danio rerio]

Match to Query 64511: 2196.052725 from(733.024851,3+) index(67910)

Data file TCDD\_0530.dta

Click mouse within plot area to zoom in by factor of two about that point

Or, Plot from  to  Da

Label all possible matches  Label matches used for scoring

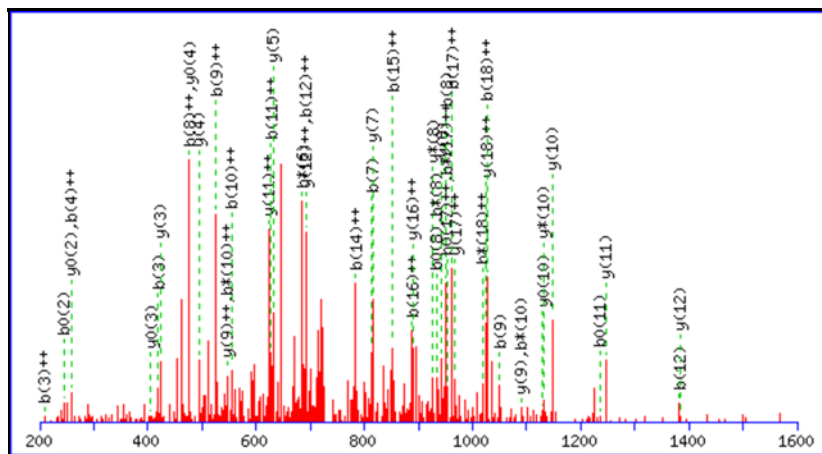

Monoisotopic mass of neutral peptide  $M_r(\text{calc})$ : 2196.1229

Ions Score: 41 Expect: 0.015

Matches : 48/208 fragment ions using 110 most intense peaks ([help](#))

| #  | b         | b <sup>++</sup> | b*        | b <sup>*++</sup> | b <sup>0</sup> | b <sup>0++</sup> | Seq. | y         | y <sup>++</sup> | y*        | y <sup>*++</sup> | y <sup>0</sup> | y <sup>0++</sup> | #  |
|----|-----------|-----------------|-----------|------------------|----------------|------------------|------|-----------|-----------------|-----------|------------------|----------------|------------------|----|
| 1  | 148.0757  | 74.5415         |           |                  |                |                  | F    |           |                 |           |                  |                |                  | 19 |
| 2  | 263.1026  | 132.0550        |           |                  | 245.0921       | 123.0497         | D    | 2050.0617 | 1025.5345       | 2033.0352 | 1017.0212        | 2032.0512      | 1016.5292        | 18 |
| 3  | 419.2037  | 210.1055        | 402.1772  | 201.5922         | 401.1932       | 201.1002         | R    | 1935.0348 | 968.0210        | 1918.0082 | 959.5078         | 1917.0242      | 959.0157         | 17 |
| 4  | 516.2565  | 258.6319        | 499.2300  | 250.1186         | 498.2459       | 249.6266         | P    | 1778.9337 | 889.9705        | 1761.9071 | 881.4572         | 1760.9231      | 880.9652         | 16 |
| 5  | 573.2780  | 287.1426        | 556.2514  | 278.6293         | 555.2674       | 278.1373         | G    | 1681.8809 | 841.4441        | 1664.8544 | 832.9308         | 1663.8703      | 832.4388         | 15 |
| 6  | 701.3366  | 351.1719        | 684.3100  | 342.6586         | 683.3260       | 342.1666         | Q    | 1624.8594 | 812.9334        | 1607.8329 | 804.4201         | 1606.8489      | 803.9281         | 14 |
| 7  | 814.4206  | 407.7139        | 797.3941  | 399.2007         | 796.4100       | 398.7087         | L    | 1496.8009 | 748.9041        | 1479.7743 | 740.3908         | 1478.7903      | 739.8988         | 13 |
| 8  | 951.4795  | 476.2434        | 934.4530  | 467.7301         | 933.4690       | 467.2381         | H    | 1383.7168 | 692.3620        | 1366.6902 | 683.8488         | 1365.7062      | 683.3568         | 12 |
| 9  | 1050.5479 | 525.7776        | 1033.5214 | 517.2643         | 1032.5374      | 516.7723         | V    | 1246.6579 | 623.8326        | 1229.6313 | 615.3193         | 1228.6473      | 614.8273         | 11 |
| 10 | 1107.5694 | 554.2883        | 1090.5429 | 545.7751         | 1089.5588      | 545.2831         | G    | 1147.5895 | 574.2984        | 1130.5629 | 565.7851         | 1129.5789      | 565.2931         | 10 |
| 11 | 1254.6378 | 627.8225        | 1237.6113 | 619.3093         | 1236.6273      | 618.8173         | F    | 1090.5680 | 545.7876        | 1073.5415 | 537.2744         | 1072.5574      | 536.7824         | 9  |
| 12 | 1382.6964 | 691.8518        | 1365.6698 | 683.3386         | 1364.6858      | 682.8466         | Q    | 943.4996  | 472.2534        | 926.4730  | 463.7402         | 925.4890       | 463.2482         | 8  |
| 13 | 1453.7335 | 727.3704        | 1436.7070 | 718.8571         | 1435.7229      | 718.3651         | A    | 815.4410  | 408.2241        | 798.4145  | 399.7109         | 797.4305       | 399.2189         | 7  |
| 14 | 1566.8176 | 783.9124        | 1549.7910 | 775.3992         | 1548.8070      | 774.9071         | L    | 744.4039  | 372.7056        | 727.3774  | 364.1923         | 726.3933       | 363.7003         | 6  |
| 15 | 1703.8765 | 852.4419        | 1686.8499 | 843.9286         | 1685.8659      | 843.4366         | H    | 631.3198  | 316.1636        | 614.2933  | 307.6503         | 613.3093       | 307.1583         | 5  |
| 16 | 1774.9136 | 887.9604        | 1757.8871 | 879.4472         | 1756.9030      | 878.9552         | A    | 494.2609  | 247.6341        | 477.2344  | 239.1208         | 476.2504       | 238.6288         | 4  |
| 17 | 1921.9820 | 961.4946        | 1904.9555 | 952.9814         | 1903.9714      | 952.4894         | F    | 423.2238  | 212.1155        | 406.1973  | 203.6023         | 405.2132       | 203.1103         | 3  |
| 18 | 2051.0246 | 1026.0159       | 2033.9981 | 1017.5027        | 2033.0140      | 1017.0107        | E    | 276.1554  | 138.5813        | 259.1288  | 130.0681         | 258.1448       | 129.5761         | 2  |
| 19 |           |                 |           |                  |                |                  | K    | 147.1128  | 74.0600         | 130.0863  | 65.5468          |                |                  | 1  |

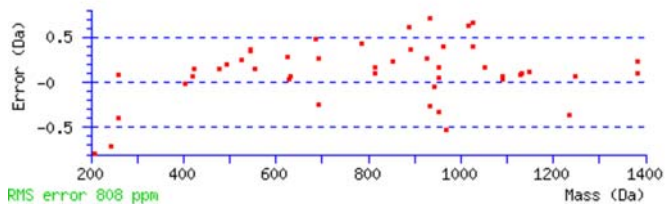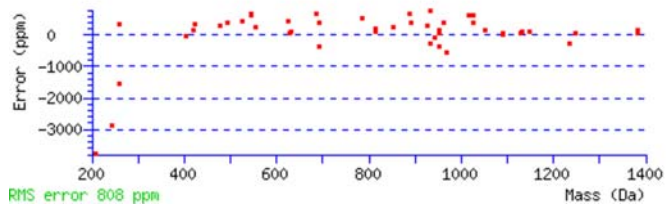

NCBI BLAST search of [FDRPGQLHVG FQALHAFEK](#)  
 (Parameters: blastp, nr protein database, expect=20000, no filter, PAM30)  
 Other BLAST [web gateways](#)

**All matches to this query**

| Score | Mr(calc): | Delta   | Sequence                                |
|-------|-----------|---------|-----------------------------------------|
| 41.4  | 2196.1229 | -0.0701 | <a href="#">FDRPGQLHVG FQALHAFEK</a>    |
| 11.5  | 2197.1275 | -1.0748 | <a href="#">NFQLQMCEYLLKIQELK</a>       |
| 11.4  | 2197.2141 | -1.1613 | <a href="#">VGGKPSMVPVATVDTGASLGVKK</a> |
| 11.0  | 2198.2158 | -2.1630 | <a href="#">IANLVLSIQTEEEILTREK</a>     |
| 7.5   | 2197.0004 | -0.9477 | <a href="#">INESRSHNLPDCTVHSCTK</a>     |
| 5.5   | 2198.0313 | -1.9786 | <a href="#">NKPNENSYCYQLLQELDK</a>      |
| 5.1   | 2198.2099 | -2.1572 | <a href="#">QIPLVSSVLNWFSPVQASVK</a>    |
| 5.0   | 2195.0027 | 1.0500  | <a href="#">TATMLCAASGNPDPEISWFK</a>    |
| 3.1   | 2195.9609 | 0.0918  | <a href="#">TGGALNRLCSDEL CQCAEEK</a>   |
| 3.0   | 2198.1113 | -2.0586 | <a href="#">QELSLQTAVCTSPGPRENIR</a>    |

**Mascot:** <http://www.matrixscience.com/>

# MASCOT SCIENCE Mascot Search Results

## Peptide View

MS/MS Fragmentation of **FLLCCLK**

Found in [gi|38564419|ref|NP\\_942572.1](#), choline transporter-like protein 2 [Danio rerio]

Match to Query 7353: 952.952724 from(477.483638,2+) index(103907)

Data file TCDD\_0530.dta

Click mouse within plot area to zoom in by factor of two about that point

Or, Plot from  to  Da

Label all possible matches  Label matches used for scoring

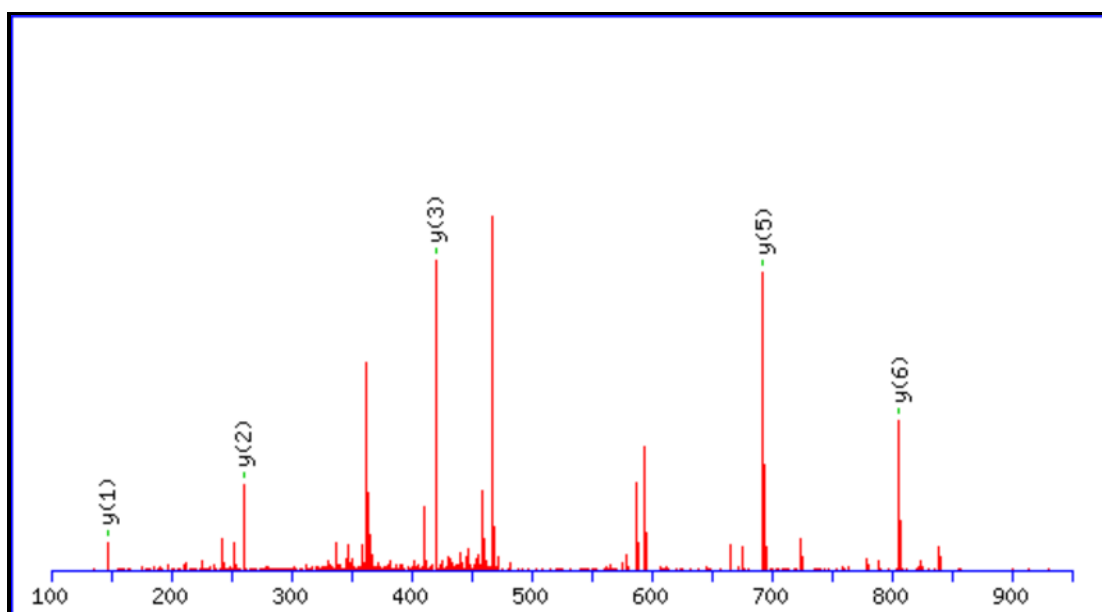

Monoisotopic mass of neutral peptide  $M_r(\text{calc})$ : 952.4874

Variable modifications:

C4 : Carbamidomethyl (C)

C5 : Carbamidomethyl (C)

Ions Score: 41 Expect: 0.024

Matches : 5/36 fragment ions using 8 most intense peaks ([help](#))

| # | b        | b <sup>++</sup> | Seq. | y        | y <sup>++</sup> | y*       | y <sup>*++</sup> | # |
|---|----------|-----------------|------|----------|-----------------|----------|------------------|---|
| 1 | 148.0757 | 74.5415         | F    |          |                 |          |                  | 7 |
| 2 | 261.1598 | 131.0835        | L    | 806.4263 | 403.7168        | 789.3997 | 395.2035         | 6 |
| 3 | 374.2438 | 187.6255        | L    | 693.3422 | 347.1748        | 676.3157 | 338.6615         | 5 |
| 4 | 534.2745 | 267.6409        | C    | 580.2582 | 290.6327        | 563.2316 | 282.1194         | 4 |
| 5 | 694.3051 | 347.6562        | C    | 420.2275 | 210.6174        | 403.2010 | 202.1041         | 3 |
| 6 | 807.3892 | 404.1982        | L    | 260.1969 | 130.6021        | 243.1703 | 122.0888         | 2 |
| 7 |          |                 | K    | 147.1128 | 74.0600         | 130.0863 | 65.5468          | 1 |

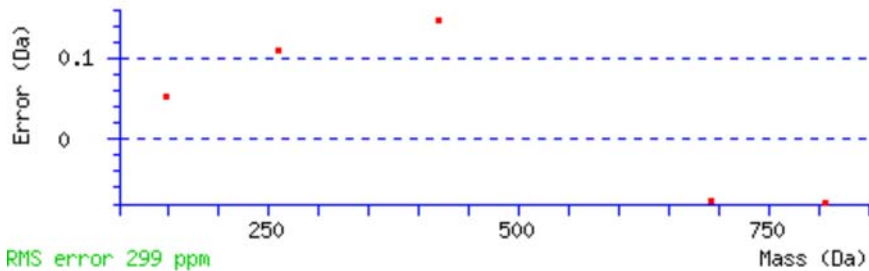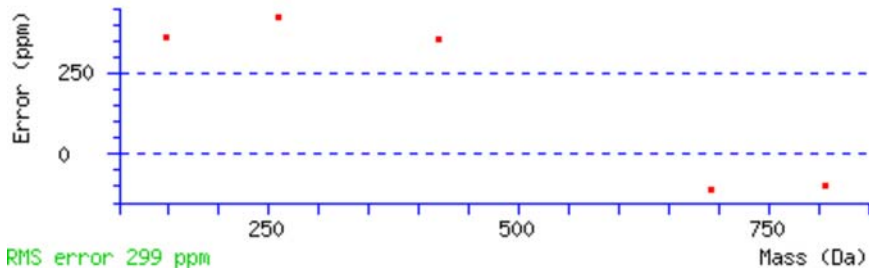

NCBI **BLAST** search of [FLLCCLK](#)

(Parameters: blastp, nr protein database, expect=20000, no filter, PAM30)

Other BLAST [web gateways](#)

**All matches to this query**

| Score | Mr(calc): | Delta  | Sequence                  |
|-------|-----------|--------|---------------------------|
| 41.2  | 952.4874  | 0.4653 | <a href="#">FLLCCLK</a>   |
| 28.5  | 951.5753  | 1.3774 | <a href="#">IHELTVLK</a>  |
| 25.5  | 952.4688  | 0.4839 | <a href="#">FICSENLK</a>  |
| 23.3  | 952.4688  | 0.4839 | <a href="#">LADFGSCLK</a> |
| 22.4  | 951.5905  | 1.3622 | <a href="#">IYRFLK</a>    |
| 21.5  | 951.4154  | 1.5373 | <a href="#">DSCGLCLK</a>  |
| 21.2  | 951.5753  | 1.3774 | <a href="#">GPSLIPQIK</a> |
| 20.8  | 951.3968  | 1.5560 | <a href="#">VCTDGGSEK</a> |
| 19.7  | 951.5575  | 1.3952 | <a href="#">IHTLMPLK</a>  |
| 19.7  | 951.5753  | 1.3774 | <a href="#">IPPGLNTLK</a> |

**Mascot:** <http://www.matrixscience.com/>

**MASCOT** SCIENCE **Mascot Search Results**

**Peptide View**

MS/MS Fragmentation of **FNNEHIPDSPFIVPVATLSDDAR**

Found in [gi|189540123|ref|XP\\_692436.3|](#), PREDICTED: similar to Filamin-C (Gamma-filamin) (Filamin-2) (FLN-C) (Actin-binding-like protein) (ABP-L) (ABP-280-like protein) [Danio rerio]

Match to Query 94640: 2553.772724 from(1277.893638,2+) index(106562)

Data file TCDD\_0530.dta

Click mouse within plot area to zoom in by factor of two about that point

Or, Plot from  to  Da

Label all possible matches  Label matches used for scoring

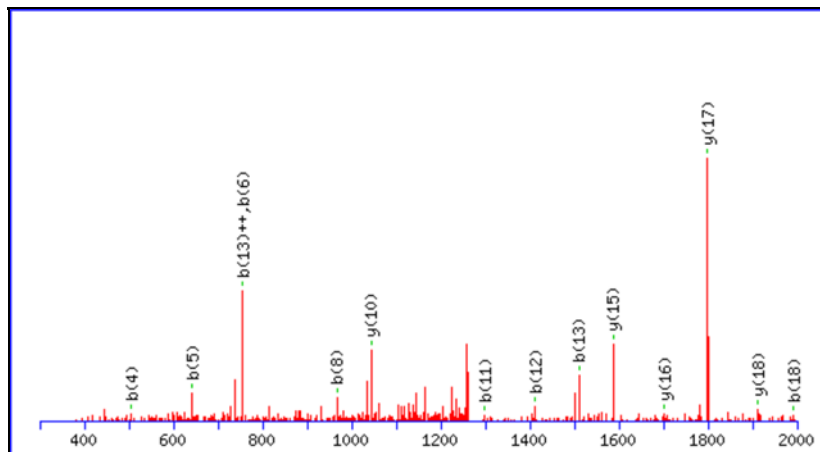

Monoisotopic mass of neutral peptide Mr(calc): 2553.2500

Ions Score: 57 Expect: 0.0003

Matches : 14/252 fragment ions using 17 most intense peaks ([help](#))

| #  | b                | b <sup>++</sup> | b*        | b <sup>*++</sup> | b <sup>0</sup> | b <sup>0++</sup> | Seq. | y                | y <sup>++</sup> | y*        | y <sup>*++</sup> | y <sup>0</sup> | y <sup>0++</sup> | #  |
|----|------------------|-----------------|-----------|------------------|----------------|------------------|------|------------------|-----------------|-----------|------------------|----------------|------------------|----|
| 1  | 148.0757         | 74.5415         |           |                  |                |                  | F    |                  |                 |           |                  |                |                  | 23 |
| 2  | 262.1186         | 131.5629        | 245.0921  | 123.0497         |                |                  | N    | 2407.1888        | 1204.0981       | 2390.1623 | 1195.5848        | 2389.1783      | 1195.0928        | 22 |
| 3  | 376.1615         | 188.5844        | 359.1350  | 180.0711         |                |                  | N    | 2293.1459        | 1147.0766       | 2276.1194 | 1138.5633        | 2275.1353      | 1138.0713        | 21 |
| 4  | <b>505.2041</b>  | 253.1057        | 488.1776  | 244.5924         | 487.1936       | 244.1004         | E    | 2179.1030        | 1090.0551       | 2162.0764 | 1081.5419        | 2161.0924      | 1081.0498        | 20 |
| 5  | <b>642.2630</b>  | 321.6352        | 625.2365  | 313.1219         | 624.2525       | 312.6299         | H    | 2050.0604        | 1025.5338       | 2033.0338 | 1017.0206        | 2032.0498      | 1016.5285        | 19 |
| 6  | <b>755.3471</b>  | 378.1772        | 738.3206  | 369.6639         | 737.3365       | 369.1719         | I    | <b>1913.0015</b> | 957.0044        | 1895.9749 | 948.4911         | 1894.9909      | 947.9991         | 18 |
| 7  | 852.3999         | 426.7036        | 835.3733  | 418.1903         | 834.3893       | 417.6983         | P    | <b>1799.9174</b> | 900.4623        | 1782.8909 | 891.9491         | 1781.9068      | 891.4571         | 17 |
| 8  | <b>967.4268</b>  | 484.2170        | 950.4003  | 475.7038         | 949.4163       | 475.2118         | D    | <b>1702.8646</b> | 851.9360        | 1685.8381 | 843.4227         | 1684.8541      | 842.9307         | 16 |
| 9  | 1054.4588        | 527.7331        | 1037.4323 | 519.2198         | 1036.4483      | 518.7278         | S    | <b>1587.8377</b> | 794.4225        | 1570.8112 | 785.9092         | 1569.8271      | 785.4172         | 15 |
| 10 | 1151.5116        | 576.2594        | 1134.4851 | 567.7462         | 1133.5010      | 567.2542         | P    | 1500.8057        | 750.9065        | 1483.7791 | 742.3932         | 1482.7951      | 741.9012         | 14 |
| 11 | <b>1298.5800</b> | 649.7937        | 1281.5535 | 641.2804         | 1280.5695      | 640.7884         | F    | 1403.7529        | 702.3801        | 1386.7264 | 693.8668         | 1385.7423      | 693.3748         | 13 |
| 12 | <b>1411.6641</b> | 706.3357        | 1394.6375 | 697.8224         | 1393.6535      | 697.3304         | I    | 1256.6845        | 628.8459        | 1239.6579 | 620.3326         | 1238.6739      | 619.8406         | 12 |
| 13 | <b>1510.7325</b> | <b>755.8699</b> | 1493.7060 | 747.3566         | 1492.7219      | 746.8646         | V    | 1143.6004        | 572.3039        | 1126.5739 | 563.7906         | 1125.5899      | 563.2986         | 11 |
| 14 | 1607.7853        | 804.3963        | 1590.7587 | 795.8830         | 1589.7747      | 795.3910         | P    | <b>1044.5320</b> | 522.7696        | 1027.5055 | 514.2564         | 1026.5214      | 513.7644         | 10 |
| 15 | 1706.8537        | 853.9305        | 1689.8271 | 845.4172         | 1688.8431      | 844.9252         | V    | 947.4793         | 474.2433        | 930.4527  | 465.7300         | 929.4687       | 465.2380         | 9  |
| 16 | 1777.8908        | 889.4490        | 1760.8642 | 880.9358         | 1759.8802      | 880.4438         | A    | 848.4108         | 424.7091        | 831.3843  | 416.1958         | 830.4003       | 415.7038         | 8  |
| 17 | 1878.9385        | 939.9729        | 1861.9119 | 931.4596         | 1860.9279      | 930.9676         | T    | 777.3737         | 389.1905        | 760.3472  | 380.6772         | 759.3632       | 380.1852         | 7  |
| 18 | <b>1992.0225</b> | 996.5149        | 1974.9960 | 988.0016         | 1974.0120      | 987.5096         | L    | 676.3260         | 338.6667        | 659.2995  | 330.1534         | 658.3155       | 329.6614         | 6  |
| 19 | 2079.0546        | 1040.0309       | 2062.0280 | 1031.5176        | 2061.0440      | 1031.0256        | S    | 563.2420         | 282.1246        | 546.2154  | 273.6114         | 545.2314       | 273.1193         | 5  |
| 20 | 2194.0815        | 1097.5444       | 2177.0550 | 1089.0311        | 2176.0709      | 1088.5391        | D    | 476.2100         | 238.6086        | 459.1834  | 230.0953         | 458.1994       | 229.6033         | 4  |
| 21 | 2309.1085        | 1155.0579       | 2292.0819 | 1146.5446        | 2291.0979      | 1146.0526        | D    | 361.1830         | 181.0951        | 344.1565  | 172.5819         | 343.1724       | 172.0899         | 3  |
| 22 | 2380.1456        | 1190.5764       | 2363.1190 | 1182.0631        | 2362.1350      | 1181.5711        | A    | 246.1561         | 123.5817        | 229.1295  | 115.0684         |                |                  | 2  |
| 23 |                  |                 |           |                  |                |                  | R    | 175.1190         | 88.0631         | 158.0924  | 79.5498          |                |                  | 1  |



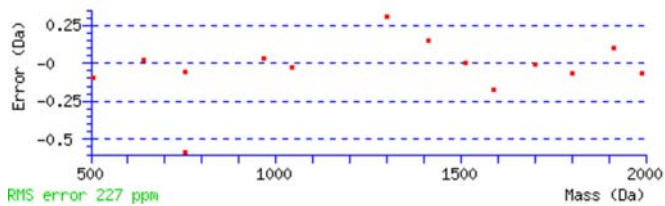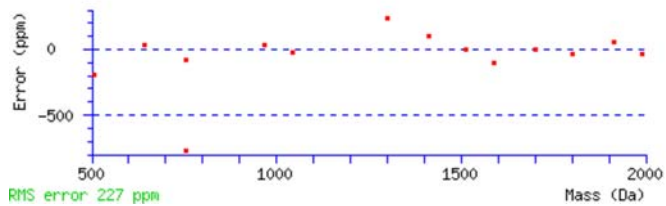

NCBI BLAST search of [FNNEHIPDSPFIVPVATLSDDAR](#)

(Parameters: blastp, nr protein database, expect=20000, no filter, PAM30)

Other BLAST [web gateways](#)

**All matches to this query**

| Score | Mr(calc): | Delta   | Sequence                                  |
|-------|-----------|---------|-------------------------------------------|
| 57.1  | 2553.2500 | 0.5228  | <a href="#">FNNEHIPDSPFIVPVATLSDDAR</a>   |
| 24.6  | 2554.2340 | -0.4613 | <a href="#">FNDEHIPDSPFIVPIASLSDDAR</a>   |
| 1.5   | 2553.2249 | 0.5479  | <a href="#">ADIRPADHPVADDFDVFVVGADGR</a>  |
| 0.7   | 2553.2745 | 0.4983  | <a href="#">EEPVRGSDGLCVEAAPGETGLLVAK</a> |
| 0.0   | 2553.3650 | 0.4077  | <a href="#">KPVDTTIINLDVSEKPTGSTVPSR</a>  |

Mascot: <http://www.matrixscience.com/>

# MASCOT SCIENCE Mascot Search Results

## Peptide View

MS/MS Fragmentation of **GATYGKPVHHGVNQIK**

Found in [gi|51010975|ref|NP\\_001003447.1](#), hypothetical protein LOC445053 [Danio rerio]

Match to Query 30240: 1705.422724 from(853.718638,2+) index(83179)

Data file TCDD\_0530.dta

Click mouse within plot area to zoom in by factor of two about that point

Or, Plot from  to  Da

Label all possible matches  Label matches used for scoring

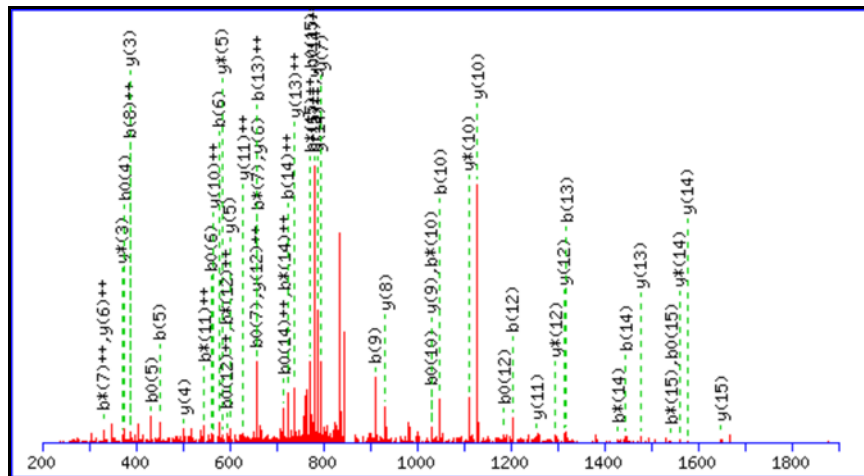

Monoisotopic mass of neutral peptide Mr(calc): 1704.9060

Ions Score: 54 Expect: 0.0012

Matches : 56/140 fragment ions using 138 most intense peaks [\(help\)](#)

| #  | b         | b <sup>++</sup> | b <sup>*</sup> | b <sup>*++</sup> | b <sup>0</sup> | b <sup>0++</sup> | Seq. | y         | y <sup>++</sup> | y <sup>*</sup> | y <sup>*++</sup> | y <sup>0</sup> | y <sup>0++</sup> | #  |
|----|-----------|-----------------|----------------|------------------|----------------|------------------|------|-----------|-----------------|----------------|------------------|----------------|------------------|----|
| 1  | 58.0287   | 29.5180         |                |                  |                |                  | G    |           |                 |                |                  |                |                  | 16 |
| 2  | 129.0659  | 65.0366         |                |                  |                |                  | A    | 1648.8918 | 824.9495        | 1631.8653      | 816.4363         | 1630.8812      | 815.9443         | 15 |
| 3  | 230.1135  | 115.5604        |                |                  | 212.1030       | 106.5551         | T    | 1577.8547 | 789.4310        | 1560.8281      | 780.9177         | 1559.8441      | 780.4257         | 14 |
| 4  | 393.1769  | 197.0921        |                |                  | 375.1663       | 188.0868         | Y    | 1476.8070 | 738.9071        | 1459.7805      | 730.3939         |                |                  | 13 |
| 5  | 450.1983  | 225.6028        |                |                  | 432.1878       | 216.5975         | G    | 1313.7437 | 657.3755        | 1296.7171      | 648.8622         |                |                  | 12 |
| 6  | 578.2933  | 289.6503        | 561.2667       | 281.1370         | 560.2827       | 280.6450         | K    | 1256.7222 | 628.8647        | 1239.6957      | 620.3515         |                |                  | 11 |
| 7  | 675.3461  | 338.1767        | 658.3195       | 329.6634         | 657.3355       | 329.1714         | P    | 1128.6273 | 564.8173        | 1111.6007      | 556.3040         |                |                  | 10 |
| 8  | 774.4145  | 387.7109        | 757.3879       | 379.1976         | 756.4039       | 378.7056         | V    | 1031.5745 | 516.2909        | 1014.5479      | 507.7776         |                |                  | 9  |
| 9  | 911.4734  | 456.2403        | 894.4468       | 447.7271         | 893.4628       | 447.2350         | H    | 932.5061  | 466.7567        | 915.4795       | 458.2434         |                |                  | 8  |
| 10 | 1048.5323 | 524.7698        | 1031.5057      | 516.2565         | 1030.5217      | 515.7645         | H    | 795.4472  | 398.2272        | 778.4206       | 389.7139         |                |                  | 7  |
| 11 | 1105.5538 | 553.2805        | 1088.5272      | 544.7672         | 1087.5432      | 544.2752         | G    | 658.3883  | 329.6978        | 641.3617       | 321.1845         |                |                  | 6  |
| 12 | 1204.6222 | 602.8147        | 1187.5956      | 594.3014         | 1186.6116      | 593.8094         | V    | 601.3668  | 301.1870        | 584.3402       | 292.6738         |                |                  | 5  |
| 13 | 1318.6651 | 659.8362        | 1301.6385      | 651.3229         | 1300.6545      | 650.8309         | N    | 502.2984  | 251.6528        | 485.2718       | 243.1395         |                |                  | 4  |
| 14 | 1446.7237 | 723.8655        | 1429.6971      | 715.3522         | 1428.7131      | 714.8602         | Q    | 388.2554  | 194.6314        | 371.2289       | 186.1181         |                |                  | 3  |
| 15 | 1559.8077 | 780.4075        | 1542.7812      | 771.8942         | 1541.7972      | 771.4022         | I    | 260.1969  | 130.6021        | 243.1703       | 122.0888         |                |                  | 2  |
| 16 |           |                 |                |                  |                |                  | K    | 147.1128  | 74.0600         | 130.0863       | 65.5468          |                |                  | 1  |

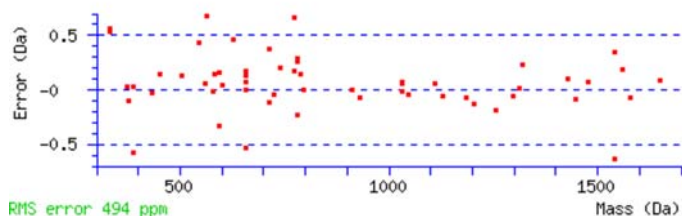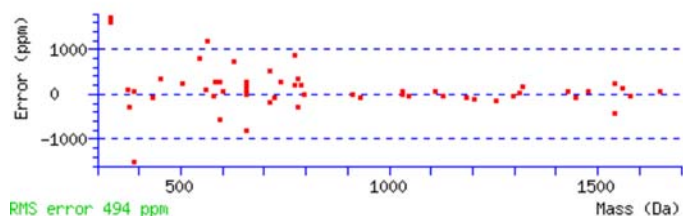

NCBI BLAST search of [GATYGKPVHHGVNQIK](#)  
 (Parameters: blastp, nr protein database, expect=20000, no filter, PAM30)  
 Other BLAST [web gateways](#)

**All matches to this query**

| Score | Mr(calc): | Delta   | Sequence                         |
|-------|-----------|---------|----------------------------------|
| 53.9  | 1704.9060 | 0.5167  | <a href="#">GATYGKPVHHGVNQIK</a> |
| 14.9  | 1705.9073 | -0.4845 | <a href="#">MELREFEALVTQIK</a>   |
| 11.4  | 1705.8028 | -0.3801 | <a href="#">KTCACAHGYLAQDGLR</a> |
| 9.9   | 1704.6364 | 0.7863  | <a href="#">CDVYGEACADCCLAR</a>  |
| 8.9   | 1705.8271 | -0.4044 | <a href="#">EVEREFDSGIIAGER</a>  |
| 7.8   | 1705.8370 | -0.4143 | <a href="#">SDGGDLLSIESKTEQK</a> |
| 7.7   | 1705.8378 | -0.4151 | <a href="#">QMLEKECQLSQELK</a>   |
| 7.3   | 1704.9338 | 0.4889  | <a href="#">EFSITEVVPFISLK</a>   |
| 7.3   | 1705.9073 | -0.4845 | <a href="#">MSEQLKFIVEQLNK</a>   |
| 6.8   | 1705.8743 | -0.4515 | <a href="#">LICQGDTVLEATMK</a>   |

Mascot: <http://www.matrixscience.com/>

# MASCOT SCIENCE Mascot Search Results

## Peptide View

MS/MS Fragmentation of **GFGFVHFEDNDSADK**

Found in [gi|47550715|ref|NP\\_999871.1](#), heterogeneous nuclear ribonucleoprotein A0 [Danio rerio]

Match to Query 29328: 1685.232724 from(843.623638,2+) index(43746)

Data file TCDD\_0530.dta

Click mouse within plot area to zoom in by factor of two about that point

Or, Plot from  to  Da

Label all possible matches  Label matches used for scoring

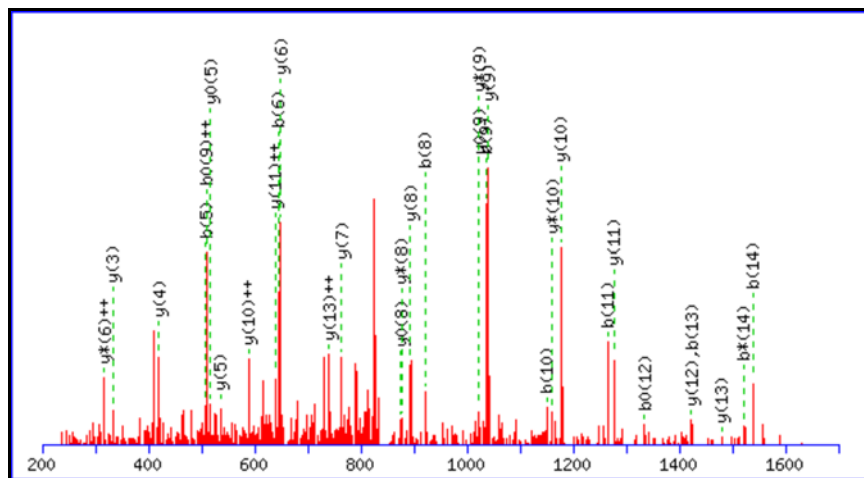

Monoisotopic mass of neutral peptide Mr(calc): 1683.7165

Ions Score: 53 Expect: 0.0014

Matches : 32/134 fragment ions using 70 most intense peaks ([help](#))

| #  | b                | b <sup>++</sup> | b <sup>*</sup>   | b <sup>*++</sup> | b <sup>0</sup>   | b <sup>0++</sup> | Seq. | y                | y <sup>++</sup> | y <sup>*</sup>   | y <sup>*++</sup> | y <sup>0</sup>   | y <sup>0++</sup> | #  |
|----|------------------|-----------------|------------------|------------------|------------------|------------------|------|------------------|-----------------|------------------|------------------|------------------|------------------|----|
| 1  | 58.0287          | 29.5180         |                  |                  |                  |                  | G    |                  |                 |                  |                  |                  |                  | 15 |
| 2  | 205.0972         | 103.0522        |                  |                  |                  |                  | F    | 1627.7023        | 814.3548        | 1610.6758        | 805.8415         | 1609.6918        | 805.3495         | 14 |
| 3  | 262.1186         | 131.5629        |                  |                  |                  |                  | G    | <b>1480.6339</b> | <b>740.8206</b> | 1463.6074        | 732.3073         | 1462.6233        | 731.8153         | 13 |
| 4  | 409.1870         | 205.0972        |                  |                  |                  |                  | F    | <b>1423.6124</b> | 712.3099        | 1406.5859        | 703.7966         | 1405.6019        | 703.3046         | 12 |
| 5  | <b>508.2554</b>  | 254.6314        |                  |                  |                  |                  | V    | <b>1276.5440</b> | <b>638.7757</b> | 1259.5175        | 630.2624         | 1258.5335        | 629.7704         | 11 |
| 6  | <b>645.3144</b>  | 323.1608        |                  |                  |                  |                  | H    | <b>1177.4756</b> | <b>589.2414</b> | <b>1160.4491</b> | 580.7282         | 1159.4651        | 580.2362         | 10 |
| 7  | 792.3828         | 396.6950        |                  |                  |                  |                  | F    | <b>1040.4167</b> | 520.7120        | <b>1023.3902</b> | 512.1987         | <b>1022.4061</b> | 511.7067         | 9  |
| 8  | <b>921.4254</b>  | 461.2163        |                  |                  | 903.4148         | 452.2110         | E    | <b>893.3483</b>  | 447.1778        | <b>876.3217</b>  | 438.6645         | <b>875.3377</b>  | 438.1725         | 8  |
| 9  | <b>1036.4523</b> | 518.7298        |                  |                  | 1018.4417        | <b>509.7245</b>  | D    | <b>764.3057</b>  | 382.6565        | 747.2792         | 374.1432         | 746.2951         | 373.6512         | 7  |
| 10 | <b>1150.4952</b> | 575.7513        | 1133.4687        | 567.2380         | 1132.4847        | 566.7460         | N    | <b>649.2788</b>  | 325.1430        | 632.2522         | <b>316.6297</b>  | 631.2682         | 316.1377         | 6  |
| 11 | <b>1265.5222</b> | 633.2647        | 1248.4956        | 624.7515         | 1247.5116        | 624.2594         | D    | <b>535.2358</b>  | 268.1216        | 518.2093         | 259.6083         | <b>517.2253</b>  | 259.1163         | 5  |
| 12 | 1352.5542        | 676.7807        | 1335.5277        | 668.2675         | <b>1334.5436</b> | 667.7755         | S    | <b>420.2089</b>  | 210.6081        | 403.1823         | 202.0948         | 402.1983         | 201.6028         | 4  |
| 13 | <b>1423.5913</b> | 712.2993        | 1406.5648        | 703.7860         | 1405.5808        | 703.2940         | A    | <b>333.1769</b>  | 167.0921        | 316.1503         | 158.5788         | 315.1663         | 158.0868         | 3  |
| 14 | <b>1538.6183</b> | 769.8128        | <b>1521.5917</b> | 761.2995         | 1520.6077        | 760.8075         | D    | 262.1397         | 131.5735        | 245.1132         | 123.0602         | 244.1292         | 122.5682         | 2  |
| 15 |                  |                 |                  |                  |                  |                  | K    | 147.1128         | 74.0600         | 130.0863         | 65.5468          |                  |                  | 1  |

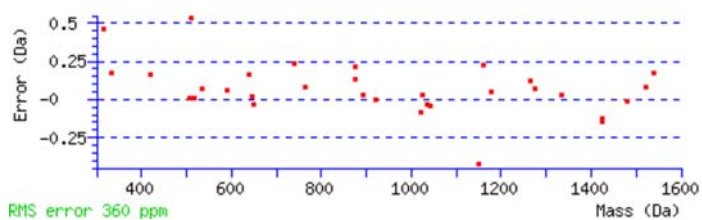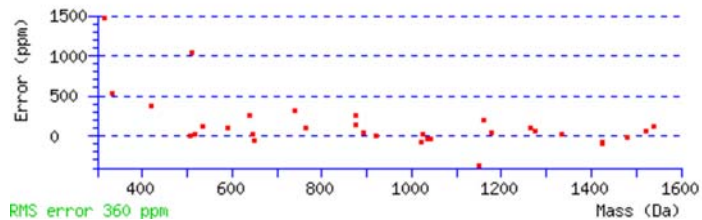

NCBI BLAST search of [GFGFVHFEDNDSADK](#)

(Parameters: blastp, nr protein database, expect=20000, no filter, PAM30)

Other BLAST [web gateways](#)

**All matches to this query**

| Score | Mr(calc): | Delta   | Sequence                          |
|-------|-----------|---------|-----------------------------------|
| 52.5  | 1683.7165 | 1.5162  | <a href="#">GFGFVHFEDNDSADK</a>   |
| 10.7  | 1684.7913 | 0.4415  | <a href="#">CDVCSREFTLSANLK</a>   |
| 6.3   | 1684.8315 | 0.4012  | <a href="#">HSTAGALKAGQSAEVCR</a> |
| 4.2   | 1683.9600 | 1.2727  | <a href="#">FFVDTSIILFLNKK</a>    |
| 3.4   | 1683.6729 | 1.5598  | <a href="#">CNYQNRCPNGSDEK</a>    |
| 2.8   | 1683.7021 | 1.5306  | <a href="#">GSTYVCCQHFAPEDK</a>   |
| 1.8   | 1685.7726 | -0.5398 | <a href="#">EHLKNMANAAGQSCR</a>   |
| 0.1   | 1682.9468 | 2.2860  | <a href="#">VRYSQLLGLHEQIK</a>    |

Mascot: <http://www.matrixscience.com/>

**MATRIX SCIENCE Mascot Search Results**

**Peptide View**

MS/MS Fragmentation of **GFPTILGHEAAGVVESVGPVTEFKPGDK**  
 Found in [gi|44917595|ref|NP\\_982285.1](#), alcohol dehydrogenase 8b [Danio rerio]

Match to Query 106233: 2895.252723 from(966.091517,3+) index(35265)  
 Data file TCDD\_0530.dta

Click mouse within plot area to zoom in by factor of two about that point

Or, Plot from  to  Da

Label all possible matches  Label matches used for scoring

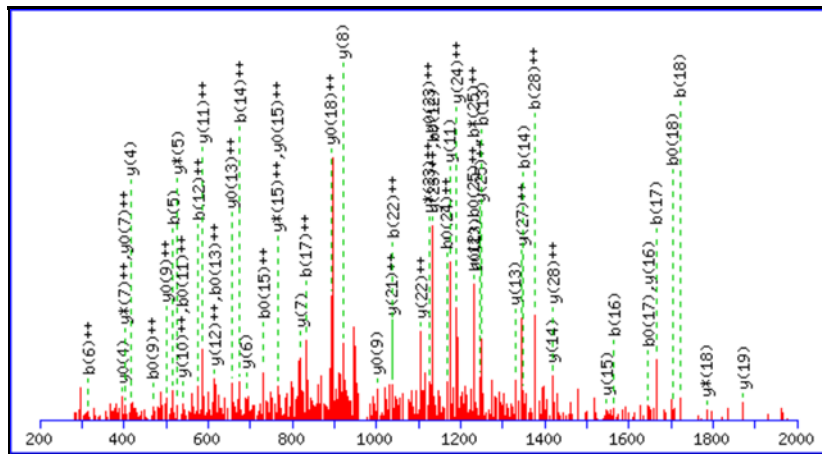

Monoisotopic mass of neutral peptide Mr(calc): 2894.4815  
 Ions Score: 43 Expect: 0.0066  
 Matches : 57/280 fragment ions using 129 most intense peaks [\(help\)](#)

| #  | b         | b <sup>++</sup> | b <sup>*</sup> | b <sup>*++</sup> | b <sup>0</sup> | b <sup>0++</sup> | Seq. | y         | y <sup>++</sup> | y <sup>*</sup> | y <sup>*++</sup> | y <sup>0</sup> | y <sup>0++</sup> | #  |
|----|-----------|-----------------|----------------|------------------|----------------|------------------|------|-----------|-----------------|----------------|------------------|----------------|------------------|----|
| 1  | 58.0287   | 29.5180         |                |                  |                |                  | G    |           |                 |                |                  |                |                  | 29 |
| 2  | 205.0972  | 103.0522        |                |                  |                |                  | F    | 2838.4672 | 1419.7373       | 2821.4407      | 1411.2240        | 2820.4567      | 1410.7320        | 28 |
| 3  | 302.1499  | 151.5786        |                |                  |                |                  | P    | 2691.3988 | 1346.2031       | 2674.3723      | 1337.6898        | 2673.3883      | 1337.1978        | 27 |
| 4  | 403.1976  | 202.1024        |                |                  | 385.1870       | 193.0972         | T    | 2594.3461 | 1297.6767       | 2577.3195      | 1289.1634        | 2576.3355      | 1288.6714        | 26 |
| 5  | 516.2817  | 258.6445        |                |                  | 498.2711       | 249.6392         | I    | 2493.2984 | 1247.1528       | 2476.2718      | 1238.6396        | 2475.2878      | 1238.1475        | 25 |
| 6  | 629.3657  | 315.1865        |                |                  | 611.3552       | 306.1812         | L    | 2380.2143 | 1190.6108       | 2363.1878      | 1182.0975        | 2362.2038      | 1181.6055        | 24 |
| 7  | 686.3872  | 343.6972        |                |                  | 668.3766       | 334.6920         | G    | 2267.1303 | 1134.0688       | 2250.1037      | 1125.5555        | 2249.1197      | 1125.0635        | 23 |
| 8  | 823.4461  | 412.2267        |                |                  | 805.4355       | 403.2214         | H    | 2210.1088 | 1105.5580       | 2193.0822      | 1097.0448        | 2192.0982      | 1096.5528        | 22 |
| 9  | 952.4887  | 476.7480        |                |                  | 934.4781       | 467.7427         | E    | 2073.0499 | 1037.0286       | 2056.0233      | 1028.5153        | 2055.0393      | 1028.0233        | 21 |
| 10 | 1023.5258 | 512.2665        |                |                  | 1005.5152      | 503.2613         | A    | 1944.0073 | 972.5073        | 1926.9807      | 963.9940         | 1925.9967      | 963.5020         | 20 |
| 11 | 1094.5629 | 547.7851        |                |                  | 1076.5524      | 538.7798         | A    | 1872.9702 | 936.9887        | 1855.9436      | 928.4754         | 1854.9596      | 927.9834         | 19 |
| 12 | 1151.5844 | 576.2958        |                |                  | 1133.5738      | 567.2905         | G    | 1801.9331 | 901.4702        | 1784.9065      | 892.9569         | 1783.9225      | 892.4649         | 18 |
| 13 | 1250.6528 | 625.8300        |                |                  | 1232.6422      | 616.8248         | V    | 1744.9116 | 872.9594        | 1727.8850      | 864.4462         | 1726.9010      | 863.9542         | 17 |
| 14 | 1349.7212 | 675.3642        |                |                  | 1331.7106      | 666.3590         | V    | 1645.8432 | 823.4252        | 1628.8166      | 814.9120         | 1627.8326      | 814.4199         | 16 |
| 15 | 1478.7638 | 739.8855        |                |                  | 1460.7532      | 730.8803         | E    | 1546.7748 | 773.8910        | 1529.7482      | 765.3777         | 1528.7642      | 764.8857         | 15 |
| 16 | 1565.7958 | 783.4016        |                |                  | 1547.7853      | 774.3963         | S    | 1417.7322 | 709.3697        | 1400.7056      | 700.8564         | 1399.7216      | 700.3644         | 14 |
| 17 | 1664.8642 | 832.9358        |                |                  | 1646.8537      | 823.9305         | V    | 1330.7001 | 665.8537        | 1313.6736      | 657.3404         | 1312.6896      | 656.8484         | 13 |
| 18 | 1721.8857 | 861.4465        |                |                  | 1703.8751      | 852.4412         | G    | 1231.6317 | 616.3195        | 1214.6052      | 607.8062         | 1213.6212      | 607.3142         | 12 |
| 19 | 1818.9385 | 909.9729        |                |                  | 1800.9279      | 900.9676         | P    | 1174.6103 | 587.8088        | 1157.5837      | 579.2955         | 1156.5997      | 578.8035         | 11 |
| 20 | 1875.9599 | 938.4836        |                |                  | 1857.9494      | 929.4783         | G    | 1077.5575 | 539.2824        | 1060.5310      | 530.7691         | 1059.5469      | 530.2771         | 10 |
| 21 | 1975.0284 | 988.0178        |                |                  | 1957.0178      | 979.0125         | V    | 1020.5360 | 510.7717        | 1003.5095      | 502.2584         | 1002.5255      | 501.7664         | 9  |
| 22 | 2076.0760 | 1038.5417       |                |                  | 2058.0655      | 1029.5364        | T    | 921.4676  | 461.2374        | 904.4411       | 452.7242         | 903.4571       | 452.2322         | 8  |
| 23 | 2205.1186 | 1103.0630       |                |                  | 2187.1081      | 1094.0577        | E    | 820.4199  | 410.7136        | 803.3934       | 402.2003         | 802.4094       | 401.7083         | 7  |
| 24 | 2352.1870 | 1176.5972       |                |                  | 2334.1765      | 1167.5919        | F    | 691.3774  | 346.1923        | 674.3508       | 337.6790         | 673.3668       | 337.1870         | 6  |

|    |           |           |           |           |           |           |   |          |          |          |          |          |          |   |
|----|-----------|-----------|-----------|-----------|-----------|-----------|---|----------|----------|----------|----------|----------|----------|---|
| 25 | 2480.2820 | 1240.6446 | 2463.2555 | 1232.1314 | 2462.2714 | 1231.6394 | K | 544.3089 | 272.6581 | 527.2824 | 264.1448 | 526.2984 | 263.6528 | 5 |
| 26 | 2577.3348 | 1289.1710 | 2560.3082 | 1280.6577 | 2559.3242 | 1280.1657 | P | 416.2140 | 208.6106 | 399.1874 | 200.0974 | 398.2034 | 199.6053 | 4 |
| 27 | 2634.3562 | 1317.6818 | 2617.3297 | 1309.1685 | 2616.3457 | 1308.6765 | G | 319.1612 | 160.0842 | 302.1347 | 151.5710 | 301.1506 | 151.0790 | 3 |
| 28 | 2749.3832 | 1375.1952 | 2732.3566 | 1366.6820 | 2731.3726 | 1366.1899 | D | 262.1397 | 131.5735 | 245.1132 | 123.0602 | 244.1292 | 122.5682 | 2 |
| 29 |           |           |           |           |           |           | K | 147.1128 | 74.0600  | 130.0863 | 65.5468  |          |          | 1 |

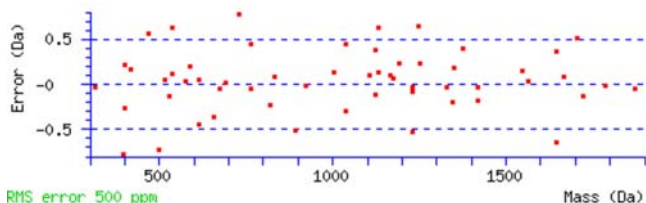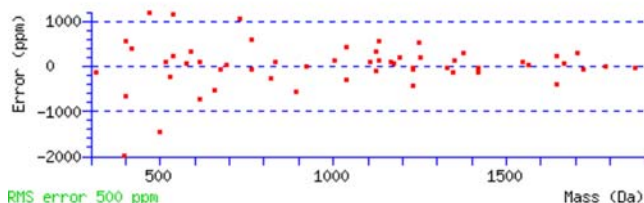

NCBI BLAST search of [GFPTILGHEAAGVVESVGPVTEFKPGDK](#)  
 (Parameters: blastp, nr protein database, expect=20000, no filter, PAM30)

Other BLAST [web gateways](#)

All matches to this query

| Score | Mr(calc): | Delta   | Sequence                                          |
|-------|-----------|---------|---------------------------------------------------|
| 43.0  | 2894.4815 | 0.7713  | <a href="#">GFPTILGHEAAGVVESVGPVTEFKPGDK</a>      |
| 10.5  | 2896.4607 | -1.2080 | <a href="#">GFPVVLGHESAGVVESVGPVTDYKPGDK</a>      |
| 8.9   | 2896.3563 | -1.1036 | <a href="#">GLPGPAGPPGPTGAQGAPGDAGDPGPMGSFGPR</a> |
| 5.8   | 2894.3262 | 0.9265  | <a href="#">SGCEGHPPWPEGICTKCQPSAITLNR</a>        |
| 5.1   | 2895.3167 | -0.0640 | <a href="#">GCLANQADLDTEWNNFLDSMLGLAER</a>        |
| 1.7   | 2896.4389 | -1.1862 | <a href="#">NLTSVSETFQHCKADHGVDILDLVQK</a>        |
| 1.4   | 2896.6302 | -1.3775 | <a href="#">RPRWVVPLACVAIWVLAFAFSPYIK</a>         |
| 1.3   | 2894.3204 | 0.9324  | <a href="#">KDQPCIDFFSWCHLVPQHGVGNHK</a>          |
| 0.8   | 2894.3386 | 0.9141  | <a href="#">VRVSCSAAESSCDSPNAGSSIIVNIEDGK</a>     |
| 0.2   | 2896.3365 | -1.0837 | <a href="#">ALLADCSLTGQCCELSLSSSLQSPNSIR</a>      |

Mascot: <http://www.matrixscience.com/>

# MASCOT SCIENCE Mascot Search Results

## Peptide View

MS/MS Fragmentation of **GHEVVFHFNPR**

Found in [gi|125833577|ref|XP\\_704272.2](#), PREDICTED: similar to Galectin-3 (Galactose-specific lectin 3) (Mac-2 antigen) (IgE-binding protein) (35 kDa lectin) (Carbohydrate-binding protein 35) (CBP 35) (Laminin-binding protein) (Lectin L-29) (L-34 galactoside-binding lectin) [Danio rerio]

Match to Query 18665: 1339.462724 from(670.738638,2+) index(75416)

Data file TCDD\_0530.dta

Click mouse within plot area to zoom in by factor of two about that point

Or, Plot from  to  Da

Label all possible matches  Label matches used for scoring

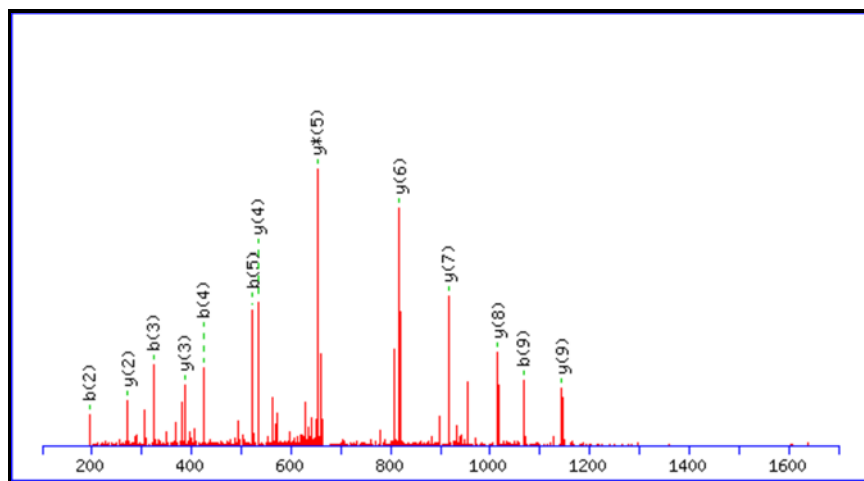

Monoisotopic mass of neutral peptide  $M_r(\text{calc})$ : 1337.6629

Ions Score: 45 Expect: 0.0091

Matches : 13/84 fragment ions using 23 most intense peaks ([help](#))

| #  | b                | b <sup>++</sup> | b*        | b <sup>*++</sup> | b <sup>0</sup> | b <sup>0++</sup> | Seq. | y                | y <sup>++</sup> | y*              | y <sup>*++</sup> | y <sup>0</sup> | y <sup>0++</sup> | #  |
|----|------------------|-----------------|-----------|------------------|----------------|------------------|------|------------------|-----------------|-----------------|------------------|----------------|------------------|----|
| 1  | 58.0287          | 29.5180         |           |                  |                |                  | G    |                  |                 |                 |                  |                |                  | 11 |
| 2  | <b>195.0877</b>  | 98.0475         |           |                  |                |                  | H    | 1281.6487        | 641.3280        | 1264.6222       | 632.8147         | 1263.6382      | 632.3227         | 10 |
| 3  | <b>324.1302</b>  | 162.5688        |           |                  | 306.1197       | 153.5635         | E    | <b>1144.5898</b> | 572.7985        | 1127.5633       | 564.2853         | 1126.5792      | 563.7933         | 9  |
| 4  | <b>423.1987</b>  | 212.1030        |           |                  | 405.1881       | 203.0977         | V    | <b>1015.5472</b> | 508.2772        | 998.5207        | 499.7640         |                |                  | 8  |
| 5  | <b>522.2671</b>  | 261.6372        |           |                  | 504.2565       | 252.6319         | V    | <b>916.4788</b>  | 458.7430        | 899.4522        | 450.2298         |                |                  | 7  |
| 6  | 669.3355         | 335.1714        |           |                  | 651.3249       | 326.1661         | F    | <b>817.4104</b>  | 409.2088        | 800.3838        | 400.6956         |                |                  | 6  |
| 7  | 806.3944         | 403.7008        |           |                  | 788.3838       | 394.6956         | H    | 670.3420         | 335.6746        | <b>653.3154</b> | 327.1613         |                |                  | 5  |
| 8  | 953.4628         | 477.2350        |           |                  | 935.4522       | 468.2298         | F    | <b>533.2831</b>  | 267.1452        | 516.2565        | 258.6319         |                |                  | 4  |
| 9  | <b>1067.5057</b> | 534.2565        | 1050.4792 | 525.7432         | 1049.4952      | 525.2512         | N    | <b>386.2146</b>  | 193.6110        | 369.1881        | 185.0977         |                |                  | 3  |
| 10 | 1164.5585        | 582.7829        | 1147.5320 | 574.2696         | 1146.5479      | 573.7776         | P    | <b>272.1717</b>  | 136.5895        | 255.1452        | 128.0762         |                |                  | 2  |
| 11 |                  |                 |           |                  |                |                  | R    | 175.1190         | 88.0631         | 158.0924        | 79.5498          |                |                  | 1  |

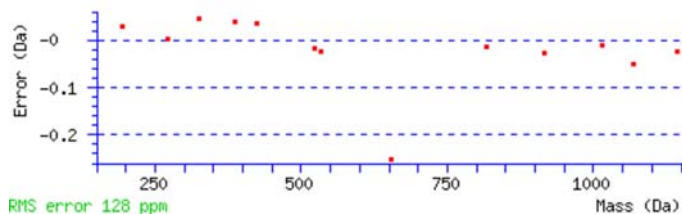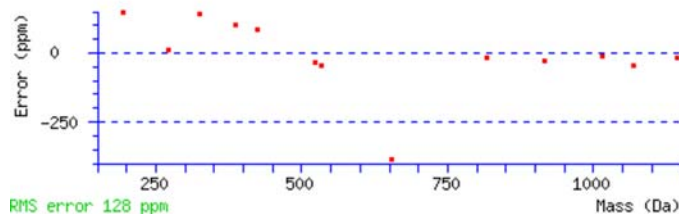

NCBI BLAST search of [GHEVVFHFNPR](#)

(Parameters: blastp, nr protein database, expect=20000, no filter, PAM30)



Other BLAST [web gateways](#)

**All matches to this query**

| Score | Mr(calc): | Delta   | Sequence                     |
|-------|-----------|---------|------------------------------|
| 45.0  | 1337.6629 | 1.7998  | <a href="#">GHEVVFHFNPR</a>  |
| 8.8   | 1337.6761 | 1.7866  | <a href="#">YLAGKEVTGNMR</a> |
| 3.0   | 1338.7044 | 0.7583  | <a href="#">GSSVYASRFLPR</a> |
| 2.9   | 1337.6220 | 1.8407  | <a href="#">CMTQTGQFLPR</a>  |
| 1.1   | 1337.6398 | 1.8230  | <a href="#">RDIHMEPTDPK</a>  |
| 0.4   | 1340.7201 | -1.2574 | <a href="#">TLSSRQFFSLR</a>  |
| 0.2   | 1337.6867 | 1.7760  | <a href="#">TVEDPAFGVYLK</a> |
| 0.0   | 1337.7191 | 1.7437  | <a href="#">STNASLKDVLKY</a> |

Mascot: <http://www.matrixscience.com/>

**MASCOT SCIENCE** Mascot Search Results

**Peptide View**

MS/MS Fragmentation of **GLDVDSLVIIEHIQVNK**

Found in [gi|47086529|ref|NP\\_997925.1](#), hypothetical protein LOC336641 [Danio rerio]

Match to Query 36374: 1780.422724 from(891.218638,2+) index(154400)

Data file TCDD\_0531.dta

Click mouse within plot area to zoom in by factor of two about that point

Or, Plot from  to  Da

Label all possible matches  Label matches used for scoring

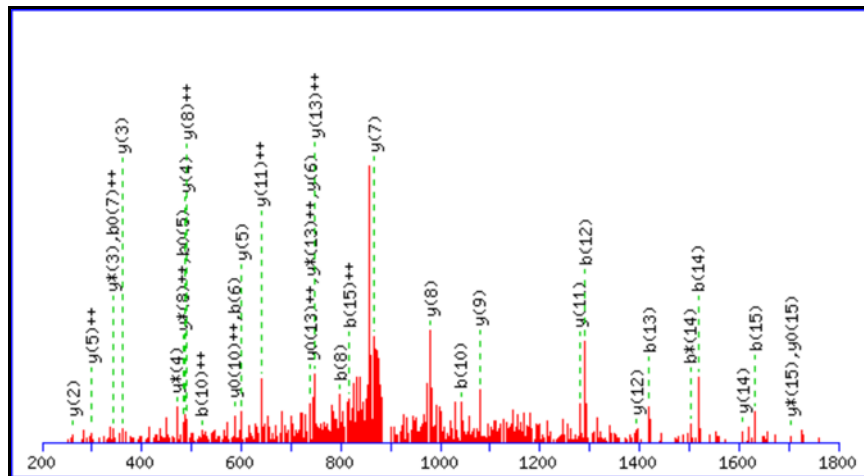

Monoisotopic mass of neutral peptide Mr(calc): 1777.9574

Ions Score: 42 Expect: 0.015

Matches : 35/140 fragment ions using 76 most intense peaks ([help](#))

| #  | b         | b <sup>++</sup> | b <sup>*</sup> | b <sup>*++</sup> | b <sup>0</sup> | b <sup>0++</sup> | Seq. | y         | y <sup>++</sup> | y <sup>*</sup> | y <sup>*++</sup> | y <sup>0</sup> | y <sup>0++</sup> | #  |
|----|-----------|-----------------|----------------|------------------|----------------|------------------|------|-----------|-----------------|----------------|------------------|----------------|------------------|----|
| 1  | 58.0287   | 29.5180         |                |                  |                |                  | G    |           |                 |                |                  |                |                  | 16 |
| 2  | 171.1128  | 86.0600         |                |                  |                |                  | L    | 1721.9432 | 861.4753        | 1704.9167      | 852.9620         | 1703.9327      | 852.4700         | 15 |
| 3  | 286.1397  | 143.5735        |                |                  | 268.1292       | 134.5682         | D    | 1608.8592 | 804.9332        | 1591.8326      | 796.4199         | 1590.8486      | 795.9279         | 14 |
| 4  | 385.2082  | 193.1077        |                |                  | 367.1976       | 184.1024         | V    | 1493.8322 | 747.4197        | 1476.8057      | 738.9065         | 1475.8217      | 738.4145         | 13 |
| 5  | 500.2351  | 250.6212        |                |                  | 482.2245       | 241.6159         | D    | 1394.7638 | 697.8855        | 1377.7373      | 689.3723         | 1376.7532      | 688.8803         | 12 |
| 6  | 587.2671  | 294.1372        |                |                  | 569.2566       | 285.1319         | S    | 1279.7369 | 640.3721        | 1262.7103      | 631.8588         | 1261.7263      | 631.3668         | 11 |
| 7  | 700.3512  | 350.6792        |                |                  | 682.3406       | 341.6740         | L    | 1192.7048 | 596.8561        | 1175.6783      | 588.3428         | 1174.6943      | 587.8508         | 10 |
| 8  | 799.4196  | 400.2134        |                |                  | 781.4090       | 391.2082         | V    | 1079.6208 | 540.3140        | 1062.5942      | 531.8007         | 1061.6102      | 531.3087         | 9  |
| 9  | 912.5037  | 456.7555        |                |                  | 894.4931       | 447.7502         | I    | 980.5524  | 490.7798        | 963.5258       | 482.2665         | 962.5418       | 481.7745         | 8  |
| 10 | 1041.5463 | 521.2768        |                |                  | 1023.5357      | 512.2715         | E    | 867.4683  | 434.2378        | 850.4417       | 425.7245         | 849.4577       | 425.2325         | 7  |
| 11 | 1178.6052 | 589.8062        |                |                  | 1160.5946      | 580.8009         | H    | 738.4257  | 369.7165        | 721.3991       | 361.2032         |                |                  | 6  |
| 12 | 1291.6892 | 646.3483        |                |                  | 1273.6787      | 637.3430         | I    | 601.3668  | 301.1870        | 584.3402       | 292.6738         |                |                  | 5  |
| 13 | 1419.7478 | 710.3775        | 1402.7213      | 701.8643         | 1401.7373      | 701.3723         | Q    | 488.2827  | 244.6450        | 471.2562       | 236.1317         |                |                  | 4  |
| 14 | 1518.8162 | 759.9118        | 1501.7897      | 751.3985         | 1500.8057      | 750.9065         | V    | 360.2241  | 180.6157        | 343.1976       | 172.1024         |                |                  | 3  |
| 15 | 1632.8592 | 816.9332        | 1615.8326      | 808.4199         | 1614.8486      | 807.9279         | N    | 261.1557  | 131.0815        | 244.1292       | 122.5682         |                |                  | 2  |
| 16 |           |                 |                |                  |                |                  | K    | 147.1128  | 74.0600         | 130.0863       | 65.5468          |                |                  | 1  |

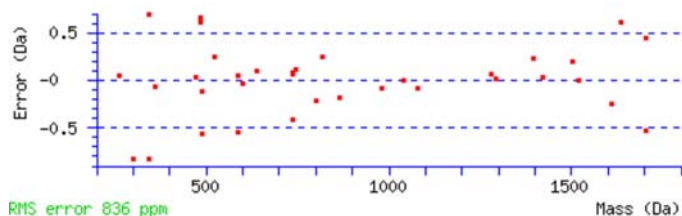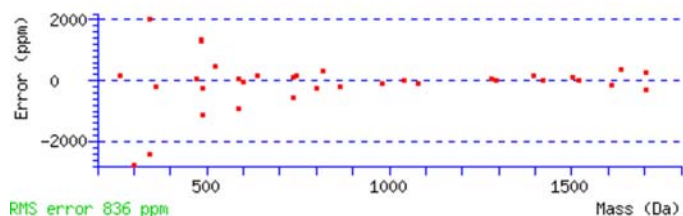

NCBI BLAST search of [GLDVDSLVIIEHIQVNK](#)  
 (Parameters: blastp, nr protein database, expect=20000, no filter, PAM30)  
 Other BLAST [web gateways](#)

**All matches to this query**

| Score | Mr(calc): | Delta   | Sequence                          |
|-------|-----------|---------|-----------------------------------|
| 42.3  | 1777.9574 | 2.4653  | <a href="#">GLDVDSLVIIEHIQVNK</a> |
| 6.9   | 1778.8734 | 1.5494  | <a href="#">IGNGGSTLHSLQCLHDK</a> |
| 6.8   | 1778.0665 | 2.3562  | <a href="#">VLEALQVLRGELTPLK</a>  |
| 5.4   | 1779.9479 | 0.4748  | <a href="#">ATQIEALQHENGTLKK</a>  |
| 4.1   | 1778.8435 | 1.5792  | <a href="#">NQEDNTSKYPDIISR</a>   |
| 2.2   | 1777.9362 | 2.4865  | <a href="#">EAVQAAAKEFLNFVNK</a>  |
| 2.2   | 1777.9583 | 2.4645  | <a href="#">LYLCVREIGGLAMVNK</a>  |
| 1.5   | 1779.9003 | 0.5225  | <a href="#">EQRSTAEQITFETLK</a>   |
| 1.3   | 1778.9719 | 1.4508  | <a href="#">IETHLLAFEIYFRK</a>    |
| 0.9   | 1781.8618 | -1.4391 | <a href="#">ENDCAIELLPGTTPPR</a>  |

**Mascot:** <http://www.matrixscience.com/>

**MASCOT SCIENCE** Mascot Search Results

**Peptide View**

MS/MS Fragmentation of **GLPALIQDHPHLHAIR**

Found in [gi|189515773|ref|XP\\_696194.3](#), PREDICTED: amylo-1, 6-glucosidase, 4-alpha-glucanotransferase [Danio rerio]

Match to Query 34799: 1787.642724 from(894.828638,2+) index(145649)

Data file TCDD\_0530.dta

Click mouse within plot area to zoom in by factor of two about that point

Or, Plot from  to  Da

Label all possible matches  Label matches used for scoring

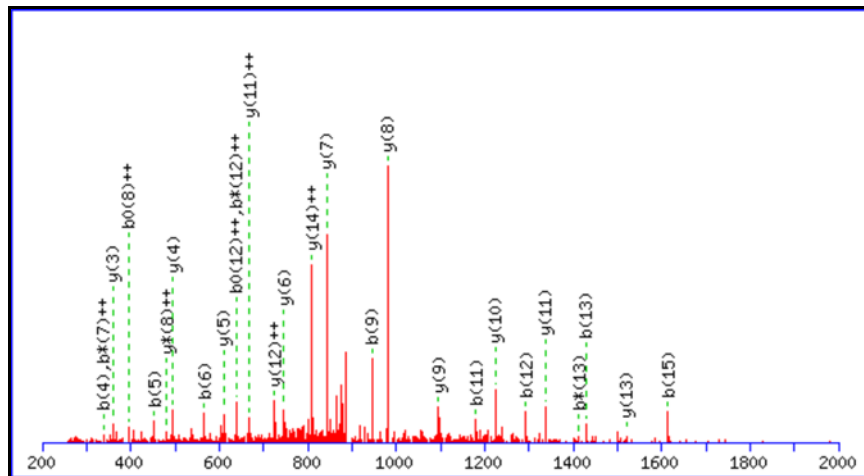

Monoisotopic mass of neutral peptide Mr(calc): 1786.9955

Ions Score: 63 Expect: 0.00012

Matches : 27/138 fragment ions using 45 most intense peaks ([help](#))

| #  | b         | b <sup>++</sup> | b <sup>*</sup> | b <sup>*++</sup> | b <sup>0</sup> | b <sup>0++</sup> | Seq. | y         | y <sup>++</sup> | y <sup>*</sup> | y <sup>*++</sup> | y <sup>0</sup> | y <sup>0++</sup> | #  |
|----|-----------|-----------------|----------------|------------------|----------------|------------------|------|-----------|-----------------|----------------|------------------|----------------|------------------|----|
| 1  | 58.0287   | 29.5180         |                |                  |                |                  | G    |           |                 |                |                  |                |                  | 16 |
| 2  | 171.1128  | 86.0600         |                |                  |                |                  | L    | 1730.9813 | 865.9943        | 1713.9547      | 857.4810         | 1712.9707      | 856.9890         | 15 |
| 3  | 268.1656  | 134.5864        |                |                  |                |                  | P    | 1617.8972 | 809.4522        | 1600.8707      | 800.9390         | 1599.8867      | 800.4470         | 14 |
| 4  | 339.2027  | 170.1050        |                |                  |                |                  | A    | 1520.8445 | 760.9259        | 1503.8179      | 752.4126         | 1502.8339      | 751.9206         | 13 |
| 5  | 452.2867  | 226.6470        |                |                  |                |                  | L    | 1449.8073 | 725.4073        | 1432.7808      | 716.8940         | 1431.7968      | 716.4020         | 12 |
| 6  | 565.3708  | 283.1890        |                |                  |                |                  | I    | 1336.7233 | 668.8653        | 1319.6967      | 660.3520         | 1318.7127      | 659.8600         | 11 |
| 7  | 693.4294  | 347.2183        | 676.4028       | 338.7051         |                |                  | Q    | 1223.6392 | 612.3232        | 1206.6127      | 603.8100         | 1205.6286      | 603.3180         | 10 |
| 8  | 808.4563  | 404.7318        | 791.4298       | 396.2185         | 790.4458       | 395.7265         | D    | 1095.5806 | 548.2940        | 1078.5541      | 539.7807         | 1077.5701      | 539.2887         | 9  |
| 9  | 945.5152  | 473.2613        | 928.4887       | 464.7480         | 927.5047       | 464.2560         | H    | 980.5537  | 490.7805        | 963.5271       | 482.2672         |                |                  | 8  |
| 10 | 1042.5680 | 521.7876        | 1025.5415      | 513.2744         | 1024.5574      | 512.7824         | P    | 843.4948  | 422.2510        | 826.4682       | 413.7378         |                |                  | 7  |
| 11 | 1179.6269 | 590.3171        | 1162.6004      | 581.8038         | 1161.6164      | 581.3118         | H    | 746.4420  | 373.7246        | 729.4155       | 365.2114         |                |                  | 6  |
| 12 | 1292.7110 | 646.8591        | 1275.6844      | 638.3459         | 1274.7004      | 637.8538         | L    | 609.3831  | 305.1952        | 592.3566       | 296.6819         |                |                  | 5  |
| 13 | 1429.7699 | 715.3886        | 1412.7433      | 706.8753         | 1411.7593      | 706.3833         | H    | 496.2990  | 248.6532        | 479.2725       | 240.1399         |                |                  | 4  |
| 14 | 1500.8070 | 750.9071        | 1483.7805      | 742.3939         | 1482.7964      | 741.9019         | A    | 359.2401  | 180.1237        | 342.2136       | 171.6104         |                |                  | 3  |
| 15 | 1613.8911 | 807.4492        | 1596.8645      | 798.9359         | 1595.8805      | 798.4439         | I    | 288.2030  | 144.6051        | 271.1765       | 136.0919         |                |                  | 2  |
| 16 |           |                 |                |                  |                |                  | R    | 175.1190  | 88.0631         | 158.0924       | 79.5498          |                |                  | 1  |

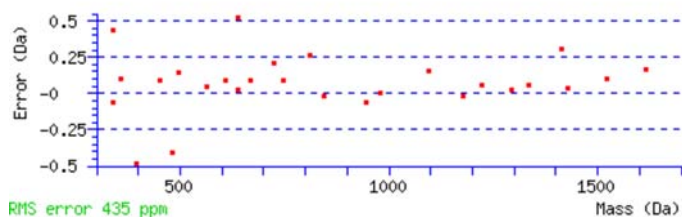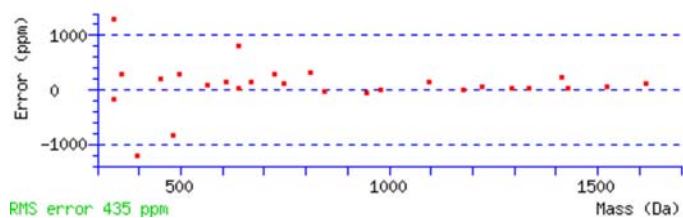

NCBI BLAST search of [GLPALIQDHPHLHAIR](#)  
 (Parameters: blastp, nr protein database, expect=20000, no filter, PAM30)  
 Other BLAST [web gateways](#)

**All matches to this query**

| Score | Mr(calc): | Delta   | Sequence                          |
|-------|-----------|---------|-----------------------------------|
| 63.1  | 1786.9955 | 0.6473  | <a href="#">GLPALIQDHPHLHAIR</a>  |
| 8.8   | 1787.7212 | -0.0784 | <a href="#">CQIYGQGCAECCLAR</a>   |
| 5.1   | 1787.8157 | -0.1730 | <a href="#">FVG YVNEGLLCVCR</a>   |
| 4.8   | 1786.8638 | 0.7789  | <a href="#">QVFSESQSPHLFER</a>    |
| 4.3   | 1787.8157 | -0.1730 | <a href="#">FVG YVNEGLLCVCR</a>   |
| 4.0   | 1786.8380 | 0.8047  | <a href="#">CVAHTNNKDSVSVGNSR</a> |
| 3.2   | 1787.7212 | -0.0784 | <a href="#">CQIYGQGCAECCLAR</a>   |
| 3.1   | 1786.8746 | 0.7681  | <a href="#">DMSDFGIVNVMKYLR</a>   |
| 2.6   | 1787.9391 | -0.2963 | <a href="#">HNSLSKKPSAAGHTPTR</a> |
| 1.6   | 1787.7542 | -0.1115 | <a href="#">VCAHTCVNTAGSFYCR</a>  |

Mascot: <http://www.matrixscience.com/>

# Mascot Search Results

## Peptide View

MS/MS Fragmentation of **GLVYETSVLDPDEGIR**

Found in [gi|41054571|ref|NP\\_955892.1](#), citrate synthase [Danio rerio]

Match to Query 33285: 1761.692724 from(881.853638,2+) index(9387)

Data file TCDD\_0530.dta

Click mouse within plot area to zoom in by factor of two about that point

Or, Plot from  to  Da

Label all possible matches  Label matches used for scoring

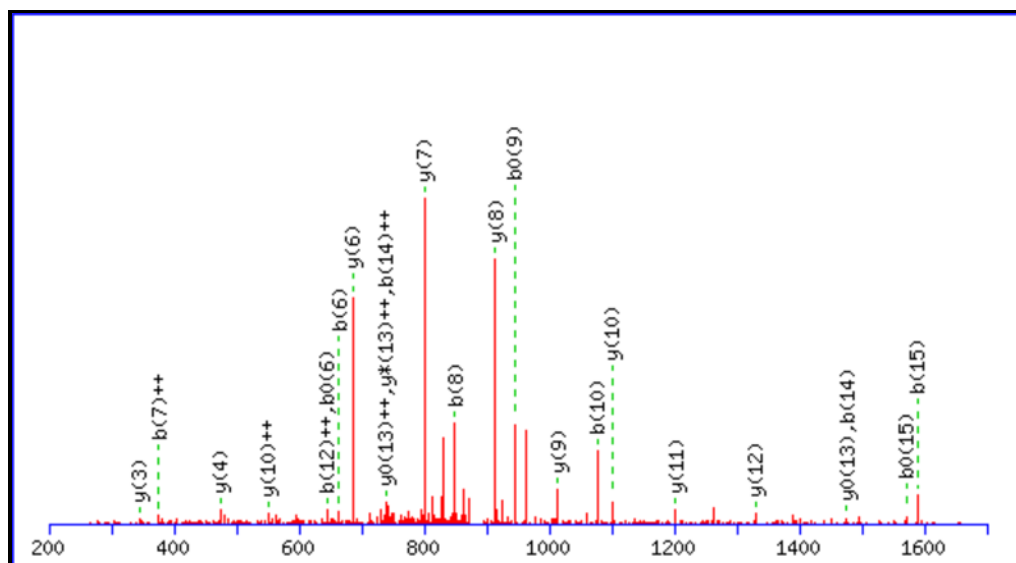

Monoisotopic mass of neutral peptide  $M_r(\text{calc})$ : 1761.8785

Ions Score: 64 Expect: 0.0001

Matches : 24/136 fragment ions using 28 most intense peaks ([help](#))

| #  | b         | b <sup>++</sup> | b <sup>0</sup> | b <sup>0++</sup> | Seq. | y         | y <sup>++</sup> | y*        | y <sup>*++</sup> | y <sup>0</sup> | y <sup>0++</sup> | #  |
|----|-----------|-----------------|----------------|------------------|------|-----------|-----------------|-----------|------------------|----------------|------------------|----|
| 1  | 58.0287   | 29.5180         |                |                  | G    |           |                 |           |                  |                |                  | 16 |
| 2  | 171.1128  | 86.0600         |                |                  | L    | 1705.8643 | 853.4358        | 1688.8378 | 844.9225         | 1687.8537      | 844.4305         | 15 |
| 3  | 270.1812  | 135.5942        |                |                  | V    | 1592.7802 | 796.8938        | 1575.7537 | 788.3805         | 1574.7697      | 787.8885         | 14 |
| 4  | 433.2445  | 217.1259        |                |                  | Y    | 1493.7118 | 747.3596        | 1476.6853 | 738.8463         | 1475.7013      | 738.3543         | 13 |
| 5  | 562.2871  | 281.6472        | 544.2766       | 272.6419         | E    | 1330.6485 | 665.8279        | 1313.6220 | 657.3146         | 1312.6379      | 656.8226         | 12 |
| 6  | 663.3348  | 332.1710        | 645.3243       | 323.1658         | T    | 1201.6059 | 601.3066        | 1184.5794 | 592.7933         | 1183.5953      | 592.3013         | 11 |
| 7  | 750.3668  | 375.6871        | 732.3563       | 366.6818         | S    | 1100.5582 | 550.7828        | 1083.5317 | 542.2695         | 1082.5477      | 541.7775         | 10 |
| 8  | 849.4353  | 425.2213        | 831.4247       | 416.2160         | V    | 1013.5262 | 507.2667        | 996.4997  | 498.7535         | 995.5156       | 498.2615         | 9  |
| 9  | 962.5193  | 481.7633        | 944.5088       | 472.7580         | L    | 914.4578  | 457.7325        | 897.4312  | 449.2193         | 896.4472       | 448.7272         | 8  |
| 10 | 1077.5463 | 539.2768        | 1059.5357      | 530.2715         | D    | 801.3737  | 401.1905        | 784.3472  | 392.6772         | 783.3632       | 392.1852         | 7  |
| 11 | 1174.5990 | 587.8032        | 1156.5885      | 578.7979         | P    | 686.3468  | 343.6770        | 669.3202  | 335.1638         | 668.3362       | 334.6717         | 6  |
| 12 | 1289.6260 | 645.3166        | 1271.6154      | 636.3113         | D    | 589.2940  | 295.1506        | 572.2675  | 286.6374         | 571.2835       | 286.1454         | 5  |
| 13 | 1418.6686 | 709.8379        | 1400.6580      | 700.8326         | E    | 474.2671  | 237.6372        | 457.2405  | 229.1239         | 456.2565       | 228.6319         | 4  |
| 14 | 1475.6900 | 738.3487        | 1457.6795      | 729.3434         | G    | 345.2245  | 173.1159        | 328.1979  | 164.6026         |                |                  | 3  |

|    |           |          |           |          |   |          |          |          |          |  |  |   |
|----|-----------|----------|-----------|----------|---|----------|----------|----------|----------|--|--|---|
| 15 | 1588.7741 | 794.8907 | 1570.7635 | 785.8854 | I | 288.2030 | 144.6051 | 271.1765 | 136.0919 |  |  | 2 |
| 16 |           |          |           |          | R | 175.1190 | 88.0631  | 158.0924 | 79.5498  |  |  | 1 |

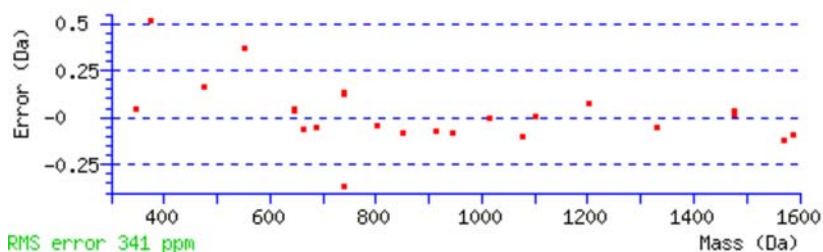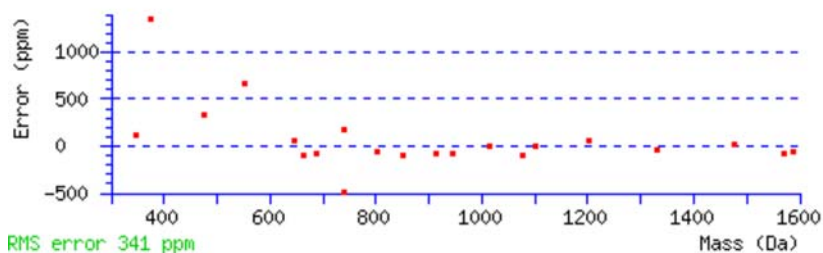

NCBI **BLAST** search of [GLVYETSVLDPDEGIR](#)

(Parameters: blastp, nr protein database, expect=20000, no filter, PAM30)

Other BLAST [web gateways](#)

**All matches to this query**

| Score | Mr(calc): | Delta   | Sequence                          |
|-------|-----------|---------|-----------------------------------|
| 64.3  | 1761.8785 | -0.1858 | <a href="#">GLVYETSVLDPDEGIR</a>  |
| 19.9  | 1762.7951 | -1.1024 | <a href="#">LVTWYDNEFGYSNR</a>    |
| 6.4   | 1761.8911 | -0.1983 | <a href="#">SSLNHEFFRGKPTSR</a>   |
| 5.5   | 1762.8221 | -1.1293 | <a href="#">EKPNTSEEGTADKTK</a>   |
| 5.3   | 1761.8931 | -0.2004 | <a href="#">SGTVEQTDILAVGSMVR</a> |
| 4.9   | 1761.8356 | -0.1428 | <a href="#">SPVTDWEEACQTLKR</a>   |
| 4.4   | 1763.8182 | -2.1255 | <a href="#">DTCEELCLLEQKQR</a>    |
| 3.9   | 1763.0094 | -1.3166 | <a href="#">GFNTGVILLYLERLR</a>   |
| 3.2   | 1762.9326 | -1.2398 | <a href="#">QSLETQYLTQRLQR</a>    |
| 3.1   | 1760.8442 | 0.8485  | <a href="#">GQSTLVYHGVESQSNR</a>  |

Mascot: <http://www.matrixscience.com/>

# MASCOT SCIENCE Mascot Search Results

## Peptide View

MS/MS Fragmentation of **GNIQHQTQEYEALLNIK**

Found in [gi|30410758|ref|NP\\_848524.1](#), keratin 18 [Danio rerio]

Match to Query 47048: 1997.992724 from(1000.003638,2+) index(33509)

Data file TCDD\_0530.dta

Click mouse within plot area to zoom in by factor of two about that point

Or, Plot from  to  Da

Label all possible matches  Label matches used for scoring

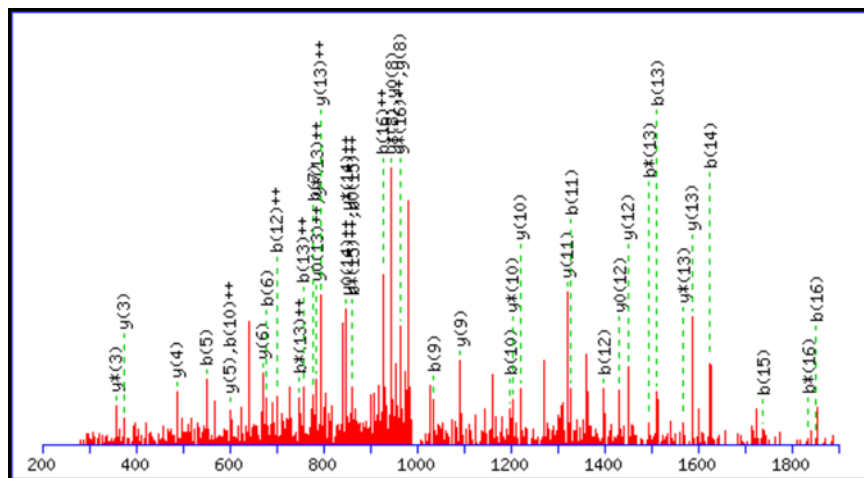

Monoisotopic mass of neutral peptide Mr(calc): 1998.0170

Ions Score: 50 Expect: 0.0022

Matches : 42/166 fragment ions using 83 most intense peaks ([help](#))

| #  | b         | b <sup>++</sup> | b <sup>*</sup> | b <sup>*++</sup> | b <sup>0</sup> | b <sup>0++</sup> | Seq. | y         | y <sup>++</sup> | y <sup>*</sup> | y <sup>*++</sup> | y <sup>0</sup> | y <sup>0++</sup> | #  |
|----|-----------|-----------------|----------------|------------------|----------------|------------------|------|-----------|-----------------|----------------|------------------|----------------|------------------|----|
| 1  | 58.0287   | 29.5180         |                |                  |                |                  | G    |           |                 |                |                  |                |                  | 17 |
| 2  | 172.0717  | 86.5395         | 155.0451       | 78.0262          |                |                  | N    | 1942.0029 | 971.5051        | 1924.9763      | 962.9918         | 1923.9923      | 962.4998         | 16 |
| 3  | 285.1557  | 143.0815        | 268.1292       | 134.5682         |                |                  | I    | 1827.9599 | 914.4836        | 1810.9334      | 905.9703         | 1809.9494      | 905.4783         | 15 |
| 4  | 413.2143  | 207.1108        | 396.1878       | 198.5975         |                |                  | Q    | 1714.8759 | 857.9416        | 1697.8493      | 849.4283         | 1696.8653      | 848.9363         | 14 |
| 5  | 550.2732  | 275.6402        | 533.2467       | 267.1270         |                |                  | H    | 1586.8173 | 793.9123        | 1569.7907      | 785.3990         | 1568.8067      | 784.9070         | 13 |
| 6  | 678.3318  | 339.6695        | 661.3053       | 331.1563         |                |                  | Q    | 1449.7584 | 725.3828        | 1432.7318      | 716.8696         | 1431.7478      | 716.3775         | 12 |
| 7  | 779.3795  | 390.1934        | 762.3529       | 381.6801         | 761.3689       | 381.1881         | T    | 1321.6998 | 661.3535        | 1304.6733      | 652.8403         | 1303.6892      | 652.3483         | 11 |
| 8  | 907.4381  | 454.2227        | 890.4115       | 445.7094         | 889.4275       | 445.2174         | Q    | 1220.6521 | 610.8297        | 1203.6256      | 602.3164         | 1202.6416      | 601.8244         | 10 |
| 9  | 1036.4806 | 518.7440        | 1019.4541      | 510.2307         | 1018.4701      | 509.7387         | E    | 1092.5936 | 546.8004        | 1075.5670      | 538.2871         | 1074.5830      | 537.7951         | 9  |
| 10 | 1199.5440 | 600.2756        | 1182.5174      | 591.7624         | 1181.5334      | 591.2703         | Y    | 963.5510  | 482.2791        | 946.5244       | 473.7658         | 945.5404       | 473.2738         | 8  |
| 11 | 1328.5866 | 664.7969        | 1311.5600      | 656.2836         | 1310.5760      | 655.7916         | E    | 800.4876  | 400.7475        | 783.4611       | 392.2342         | 782.4771       | 391.7422         | 7  |
| 12 | 1399.6237 | 700.3155        | 1382.5971      | 691.8022         | 1381.6131      | 691.3102         | A    | 671.4450  | 336.2262        | 654.4185       | 327.7129         |                |                  | 6  |
| 13 | 1512.7077 | 756.8575        | 1495.6812      | 748.3442         | 1494.6972      | 747.8522         | L    | 600.4079  | 300.7076        | 583.3814       | 292.1943         |                |                  | 5  |
| 14 | 1625.7918 | 813.3995        | 1608.7653      | 804.8863         | 1607.7812      | 804.3943         | L    | 487.3239  | 244.1656        | 470.2973       | 235.6523         |                |                  | 4  |
| 15 | 1739.8347 | 870.4210        | 1722.8082      | 861.9077         | 1721.8242      | 861.4157         | N    | 374.2398  | 187.6235        | 357.2132       | 179.1103         |                |                  | 3  |
| 16 | 1852.9188 | 926.9630        | 1835.8923      | 918.4498         | 1834.9082      | 917.9578         | I    | 260.1969  | 130.6021        | 243.1703       | 122.0888         |                |                  | 2  |
| 17 |           |                 |                |                  |                |                  | K    | 147.1128  | 74.0600         | 130.0863       | 65.5468          |                |                  | 1  |



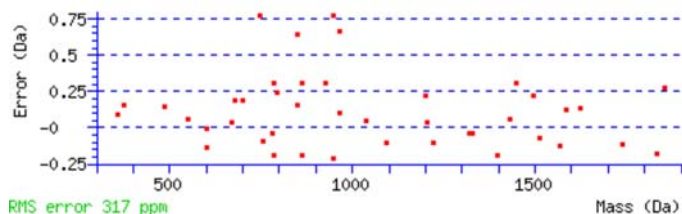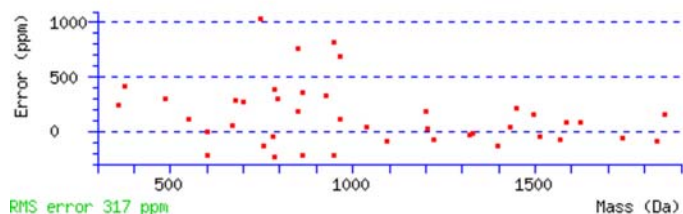

NCBI BLAST search of [GNIQHQTQEYEALLNIK](#)  
 (Parameters: blastp, nr protein database, expect=20000, no filter, PAM30)  
 Other BLAST [web gateways](#)

**All matches to this query**

| Score | Mr(calc): | Delta   | Sequence                             |
|-------|-----------|---------|--------------------------------------|
| 49.8  | 1998.0170 | -0.0243 | <a href="#">GNIQHQTQEYEALLNIK</a>    |
| 14.8  | 1998.9130 | -0.9203 | <a href="#">LENGEEELDENGALTPNR</a>   |
| 9.1   | 1998.0826 | -0.0899 | <a href="#">ALETAVYGAYFNVIINLK</a>   |
| 4.7   | 1999.9316 | -1.9389 | <a href="#">NATSPIWQYFGFTPDEK</a>    |
| 4.3   | 1999.8525 | -1.8598 | <a href="#">YRHPACFVCSDCGMNLK</a>    |
| 4.0   | 1999.9810 | -1.9883 | <a href="#">ITATTRDPELANEQQADK</a>   |
| 2.6   | 1998.9907 | -0.9980 | <a href="#">LFLAGYEMTPTMRDINK</a>    |
| 2.2   | 2000.0546 | -2.0619 | <a href="#">LMEQLANIAMRQLLDNK</a>    |
| 2.2   | 1998.9706 | -0.9778 | <a href="#">LLDGEATSVSSSSSSSTTRK</a> |
| 2.0   | 1999.0093 | -1.0166 | <a href="#">LLFLILCFQQCSVQCK</a>     |

Mascot: <http://www.matrixscience.com/>

**MATRIX SCIENCE Mascot Search Results**

**Peptide View**

MS/MS Fragmentation of **HAINQEINAYNTPAQFGLEGS GK**

Found in [gi|189533438|ref|XP\\_696505.3|](#), PREDICTED: novel protein similar to vertebrate apolipoprotein B (including Ag(x) antigen) (APOB) [Danio rerio]

Match to Query 90508: 2458.812724 from(1230.413638,2+) index(44176)

Data file TCDD\_0530.dta

Click mouse within plot area to zoom in by factor of two about that point

Or, Plot from  to  Da

Label all possible matches  Label matches used for scoring

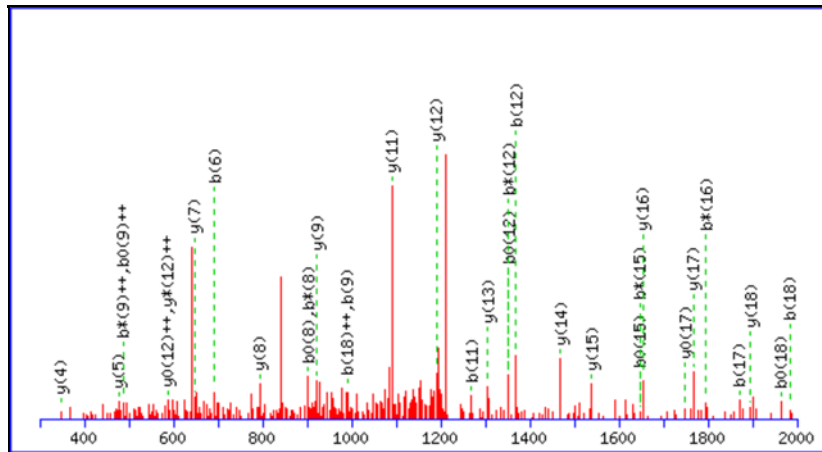

Monoisotopic mass of neutral peptide Mr(calc): 2458.1877

Ions Score: 62 Expect: 9.8e-005

Matches : 33/244 fragment ions using 67 most intense peaks ([help](#))

| #  | b                | b <sup>++</sup> | b <sup>*</sup>   | b <sup>*++</sup> | b <sup>0</sup>   | b <sup>0++</sup> | Seq. | y                | y <sup>++</sup> | y <sup>*</sup> | y <sup>*++</sup> | y <sup>0</sup>   | y <sup>0++</sup> | #  |
|----|------------------|-----------------|------------------|------------------|------------------|------------------|------|------------------|-----------------|----------------|------------------|------------------|------------------|----|
| 1  | 138.0662         | 69.5367         |                  |                  |                  |                  | H    |                  |                 |                |                  |                  |                  | 23 |
| 2  | 209.1033         | 105.0553        |                  |                  |                  |                  | A    | 2322.1361        | 1161.5717       | 2305.1095      | 1153.0584        | 2304.1255        | 1152.5664        | 22 |
| 3  | 322.1874         | 161.5973        |                  |                  |                  |                  | I    | 2251.0990        | 1126.0531       | 2234.0724      | 1117.5398        | 2233.0884        | 1117.0478        | 21 |
| 4  | 436.2303         | 218.6188        | 419.2037         | 210.1055         |                  |                  | N    | 2138.0149        | 1069.5111       | 2120.9883      | 1060.9978        | 2120.0043        | 1060.5058        | 20 |
| 5  | 564.2889         | 282.6481        | 547.2623         | 274.1348         |                  |                  | Q    | 2023.9720        | 1012.4896       | 2006.9454      | 1003.9763        | 2005.9614        | 1003.4843        | 19 |
| 6  | <b>693.3315</b>  | 347.1694        | 676.3049         | 338.6561         | 675.3209         | 338.1641         | E    | <b>1895.9134</b> | 948.4603        | 1878.8868      | 939.9471         | 1877.9028        | 939.4550         | 18 |
| 7  | 806.4155         | 403.7114        | 789.3890         | 395.1981         | 788.4050         | 394.7061         | I    | <b>1766.8708</b> | 883.9390        | 1749.8442      | 875.4258         | <b>1748.8602</b> | 874.9338         | 17 |
| 8  | 920.4585         | 460.7329        | <b>903.4319</b>  | 452.2196         | <b>902.4479</b>  | 451.7276         | N    | <b>1653.7867</b> | 827.3970        | 1636.7602      | 818.8837         | 1635.7762        | 818.3917         | 16 |
| 9  | <b>991.4956</b>  | 496.2514        | 974.4690         | <b>487.7381</b>  | 973.4850         | <b>487.2461</b>  | A    | <b>1539.7438</b> | 770.3755        | 1522.7173      | 761.8623         | 1521.7332        | 761.3703         | 15 |
| 10 | 1154.5589        | 577.7831        | 1137.5323        | 569.2698         | 1136.5483        | 568.7778         | Y    | <b>1468.7067</b> | 734.8570        | 1451.6801      | 726.3437         | 1450.6961        | 725.8517         | 14 |
| 11 | <b>1268.6018</b> | 634.8046        | 1251.5753        | 626.2913         | 1250.5913        | 625.7993         | N    | <b>1305.6434</b> | 653.3253        | 1288.6168      | 644.8120         | 1287.6328        | 644.3200         | 13 |
| 12 | <b>1369.6495</b> | 685.3284        | <b>1352.6230</b> | 676.8151         | <b>1351.6389</b> | 676.3231         | T    | <b>1191.6004</b> | 596.3039        | 1174.5739      | <b>587.7906</b>  | 1173.5899        | <b>587.2986</b>  | 12 |
| 13 | 1466.7023        | 733.8548        | 1449.6757        | 725.3415         | 1448.6917        | 724.8495         | P    | <b>1090.5528</b> | 545.7800        | 1073.5262      | 537.2667         | 1072.5422        | 536.7747         | 11 |
| 14 | 1537.7394        | 769.3733        | 1520.7128        | 760.8601         | 1519.7288        | 760.3680         | A    | 993.5000         | 497.2536        | 976.4734       | 488.7404         | 975.4894         | 488.2483         | 10 |
| 15 | 1665.7980        | 833.4026        | <b>1648.7714</b> | 824.8893         | <b>1647.7874</b> | 824.3973         | Q    | <b>922.4629</b>  | 461.7351        | 905.4363       | 453.2218         | 904.4523         | 452.7298         | 9  |
| 16 | 1812.8664        | 906.9368        | <b>1795.8398</b> | 898.4236         | 1794.8558        | 897.9315         | F    | <b>794.4043</b>  | 397.7058        | 777.3777       | 389.1925         | 776.3937         | 388.7005         | 8  |
| 17 | <b>1869.8878</b> | 935.4476        | 1852.8613        | 926.9343         | 1851.8773        | 926.4423         | G    | <b>647.3359</b>  | 324.1716        | 630.3093       | 315.6583         | 629.3253         | 315.1663         | 7  |
| 18 | <b>1982.9719</b> | <b>991.9896</b> | 1965.9454        | 983.4763         | <b>1964.9613</b> | 982.9843         | L    | 590.3144         | 295.6608        | 573.2879       | 287.1476         | 572.3039         | 286.6556         | 6  |
| 19 | 2112.0145        | 1056.5109       | 2094.9879        | 1047.9976        | 2094.0039        | 1047.5056        | E    | <b>477.2304</b>  | 239.1188        | 460.2038       | 230.6055         | 459.2198         | 230.1135         | 5  |
| 20 | 2169.0360        | 1085.0216       | 2152.0094        | 1076.5083        | 2151.0254        | 1076.0163        | G    | <b>348.1878</b>  | 174.5975        | 331.1612       | 166.0842         | 330.1772         | 165.5922         | 4  |
| 21 | 2256.0680        | 1128.5376       | 2239.0414        | 1120.0244        | 2238.0574        | 1119.5323        | S    | 291.1663         | 146.0868        | 274.1397       | 137.5735         | 273.1557         | 137.0815         | 3  |
| 22 | 2313.0895        | 1157.0484       | 2296.0629        | 1148.5351        | 2295.0789        | 1148.0431        | G    | 204.1343         | 102.5708        | 187.1077       | 94.0575          |                  |                  | 2  |
| 23 |                  |                 |                  |                  |                  |                  | K    | 147.1128         | 74.0600         | 130.0863       | 65.5468          |                  |                  | 1  |

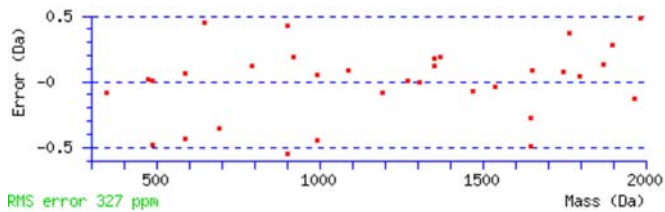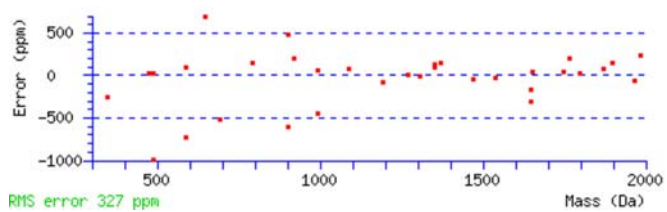

NCBI BLAST search of [HAINQEINAYNTPAQFGLEGSBK](#)

(Parameters: blastp, nr protein database, expect=20000, no filter, PAM30)

Other BLAST [web gateways](#)

**All matches to this query**

| Score | Mr(calc): | Delta  | Sequence                                |
|-------|-----------|--------|-----------------------------------------|
| 62.1  | 2458.1877 | 0.6251 | <a href="#">HAINQEINAYNTPAQFGLEGSBK</a> |

Mascot: <http://www.matrixscience.com/>

# MASCOT SCIENCE Mascot Search Results

## Peptide View

MS/MS Fragmentation of **HGGAIPVPTSDFQER**

Found in [gi47086875|refNP\\_997741.1](#), glutamate dehydrogenase 1a [Danio rerio]

Match to Query 30994: 1722.792724 from(862.403638,2+) index(54838)

Data file TCDD\_0530.dta

Click mouse within plot area to zoom in by factor of two about that point

Or, Plot from  to  Da

Label all possible matches  Label matches used for scoring

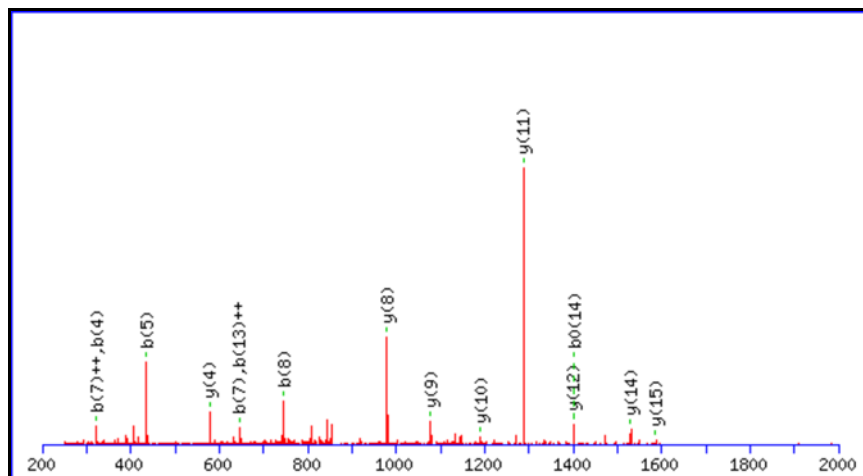

Monoisotopic mass of neutral peptide Mr(calc): 1722.8689

Ions Score: 47 Expect: 0.005

Matches : 15/134 fragment ions using 28 most intense peaks ([help](#))

| #  | b               | b <sup>++</sup> | b <sup>*</sup> | b <sup>*++</sup> | b <sup>0</sup>   | b <sup>0++</sup> | Seq. | y                | y <sup>++</sup> | y <sup>*</sup> | y <sup>*++</sup> | y <sup>0</sup> | y <sup>0++</sup> | #  |
|----|-----------------|-----------------|----------------|------------------|------------------|------------------|------|------------------|-----------------|----------------|------------------|----------------|------------------|----|
| 1  | 138.0662        | 69.5367         |                |                  |                  |                  | H    |                  |                 |                |                  |                |                  | 16 |
| 2  | 195.0877        | 98.0475         |                |                  |                  |                  | G    | <b>1586.8173</b> | 793.9123        | 1569.7908      | 785.3990         | 1568.8067      | 784.9070         | 15 |
| 3  | 252.1091        | 126.5582        |                |                  |                  |                  | G    | <b>1529.7958</b> | 765.4016        | 1512.7693      | 756.8883         | 1511.7853      | 756.3963         | 14 |
| 4  | <b>323.1462</b> | 162.0768        |                |                  |                  |                  | A    | 1472.7744        | 736.8908        | 1455.7478      | 728.3775         | 1454.7638      | 727.8855         | 13 |
| 5  | <b>436.2303</b> | 218.6188        |                |                  |                  |                  | I    | <b>1401.7373</b> | 701.3723        | 1384.7107      | 692.8590         | 1383.7267      | 692.3670         | 12 |
| 6  | 533.2831        | 267.1452        |                |                  |                  |                  | P    | <b>1288.6532</b> | 644.8302        | 1271.6266      | 636.3170         | 1270.6426      | 635.8250         | 11 |
| 7  | <b>646.3671</b> | <b>323.6872</b> |                |                  |                  |                  | I    | <b>1191.6004</b> | 596.3039        | 1174.5739      | 587.7906         | 1173.5899      | 587.2986         | 10 |
| 8  | <b>745.4355</b> | 373.2214        |                |                  |                  |                  | V    | <b>1078.5164</b> | 539.7618        | 1061.4898      | 531.2485         | 1060.5058      | 530.7565         | 9  |
| 9  | 842.4883        | 421.7478        |                |                  |                  |                  | P    | <b>979.4480</b>  | 490.2276        | 962.4214       | 481.7143         | 961.4374       | 481.2223         | 8  |
| 10 | 943.5360        | 472.2716        |                |                  | 925.5254         | 463.2663         | T    | 882.3952         | 441.7012        | 865.3686       | 433.1880         | 864.3846       | 432.6959         | 7  |
| 11 | 1030.5680       | 515.7876        |                |                  | 1012.5574        | 506.7824         | S    | 781.3475         | 391.1774        | 764.3210       | 382.6641         | 763.3369       | 382.1721         | 6  |
| 12 | 1145.5950       | 573.3011        |                |                  | 1127.5844        | 564.2958         | D    | 694.3155         | 347.6614        | 677.2889       | 339.1481         | 676.3049       | 338.6561         | 5  |
| 13 | 1292.6634       | <b>646.8353</b> |                |                  | 1274.6528        | 637.8300         | F    | <b>579.2885</b>  | 290.1479        | 562.2620       | 281.6346         | 561.2780       | 281.1426         | 4  |
| 14 | 1420.7219       | 710.8646        | 1403.6954      | 702.3513         | <b>1402.7114</b> | 701.8593         | Q    | 432.2201         | 216.6137        | 415.1936       | 208.1004         | 414.2096       | 207.6084         | 3  |
| 15 | 1549.7645       | 775.3859        | 1532.7380      | 766.8726         | 1531.7540        | 766.3806         | E    | 304.1615         | 152.5844        | 287.1350       | 144.0711         | 286.1510       | 143.5791         | 2  |
| 16 |                 |                 |                |                  |                  |                  | R    | 175.1190         | 88.0631         | 158.0924       | 79.5498          |                |                  | 1  |

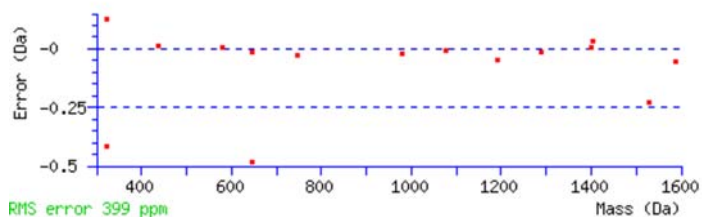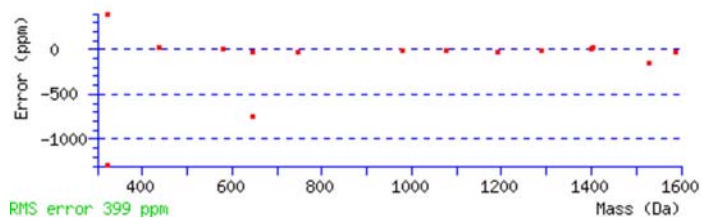

NCBI BLAST search of [HGGAIPIVPTSDFQER](#)

(Parameters: blastp, nr protein database, expect=20000, no filter, PAM30)

Other BLAST [web gateways](#)

**All matches to this query**

| Score | Mr(calc): | Delta   | Sequence                         |
|-------|-----------|---------|----------------------------------|
| 47.3  | 1722.8689 | -0.0762 | <a href="#">HGGAIPIVPTSDFQER</a> |
| 18.1  | 1721.9424 | 0.8503  | <a href="#">VQLLHSQNTSLINQK</a>  |
| 18.1  | 1721.9424 | 0.8503  | <a href="#">VQLLHSQNTSLLNQK</a>  |
| 4.7   | 1723.8814 | -1.0887 | <a href="#">IPENLSDPNVPASLMK</a> |
| 3.3   | 1724.7940 | -2.0013 | <a href="#">THYQNDIERMYGAK</a>   |
| 3.3   | 1722.9767 | -0.1840 | <a href="#">EIEKVLPAVVQEEIK</a>  |
| 3.1   | 1724.7134 | -1.9207 | <a href="#">ECDWNNQDEKSVMK</a>   |
| 2.7   | 1722.7784 | 0.0143  | <a href="#">HQGLAQQCYDYEIR</a>   |
| 2.0   | 1722.8247 | -0.0320 | <a href="#">SELNVCPETTAGFLSR</a> |
| 1.9   | 1720.8567 | 1.9361  | <a href="#">GDDMLITSGRSPFLGR</a> |

Mascot: <http://www.matrixscience.com/>

**MASCOT** SCIENCE **Mascot Search Results**

**Peptide View**

MS/MS Fragmentation of **HHNEVDLLEAIDPNDSK**

Found in [gi|55742591|ref|NP\\_998335.1](#), telomerase binding protein, p23 [Danio rerio]

Match to Query 44018: 1946.402724 from(974.208638,2+) index(137877)

Data file TCDD\_0530.dta

Click mouse within plot area to zoom in by factor of two about that point

Or, Plot from  to  Da

Label all possible matches  Label matches used for scoring

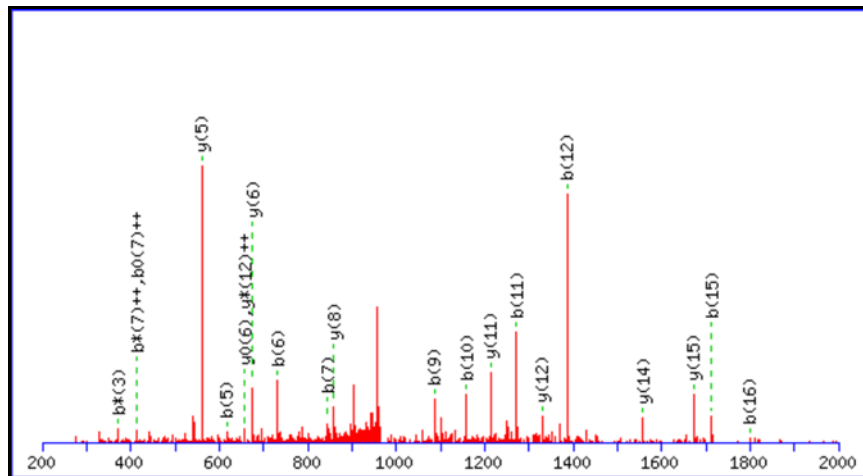

Monoisotopic mass of neutral peptide Mr(calc): 1944.9177

Ions Score: 59 Expect: 0.00027

Matches : 21/180 fragment ions using 33 most intense peaks ([help](#))

| #  | b         | b <sup>++</sup> | b <sup>*</sup> | b <sup>*++</sup> | b <sup>0</sup> | b <sup>0++</sup> | Seq. | y         | y <sup>++</sup> | y <sup>*</sup> | y <sup>*++</sup> | y <sup>0</sup> | y <sup>0++</sup> | #  |
|----|-----------|-----------------|----------------|------------------|----------------|------------------|------|-----------|-----------------|----------------|------------------|----------------|------------------|----|
| 1  | 138.0662  | 69.5367         |                |                  |                |                  | H    |           |                 |                |                  |                |                  | 17 |
| 2  | 275.1251  | 138.0662        |                |                  |                |                  | H    | 1808.8661 | 904.9367        | 1791.8395      | 896.4234         | 1790.8555      | 895.9314         | 16 |
| 3  | 389.1680  | 195.0877        | 372.1415       | 186.5744         |                |                  | N    | 1671.8072 | 836.4072        | 1654.7806      | 827.8940         | 1653.7966      | 827.4019         | 15 |
| 4  | 518.2106  | 259.6089        | 501.1841       | 251.0957         | 500.2001       | 250.6037         | E    | 1557.7643 | 779.3858        | 1540.7377      | 770.8725         | 1539.7537      | 770.3805         | 14 |
| 5  | 617.2790  | 309.1432        | 600.2525       | 300.6299         | 599.2685       | 300.1379         | V    | 1428.7217 | 714.8645        | 1411.6951      | 706.3512         | 1410.7111      | 705.8592         | 13 |
| 6  | 732.3060  | 366.6566        | 715.2794       | 358.1434         | 714.2954       | 357.6513         | D    | 1329.6533 | 665.3303        | 1312.6267      | 656.8170         | 1311.6427      | 656.3250         | 12 |
| 7  | 845.3900  | 423.1987        | 828.3635       | 414.6854         | 827.3795       | 414.1934         | L    | 1214.6263 | 607.8168        | 1197.5998      | 599.3035         | 1196.6157      | 598.8115         | 11 |
| 8  | 958.4741  | 479.7407        | 941.4476       | 471.2274         | 940.4635       | 470.7354         | L    | 1101.5422 | 551.2748        | 1084.5157      | 542.7615         | 1083.5317      | 542.2695         | 10 |
| 9  | 1087.5167 | 544.2620        | 1070.4901      | 535.7487         | 1069.5061      | 535.2567         | E    | 988.4582  | 494.7327        | 971.4316       | 486.2195         | 970.4476       | 485.7274         | 9  |
| 10 | 1158.5538 | 579.7805        | 1141.5273      | 571.2673         | 1140.5432      | 570.7753         | A    | 859.4156  | 430.2114        | 842.3890       | 421.6982         | 841.4050       | 421.2061         | 8  |
| 11 | 1271.6379 | 636.3226        | 1254.6113      | 627.8093         | 1253.6273      | 627.3173         | I    | 788.3785  | 394.6929        | 771.3519       | 386.1796         | 770.3679       | 385.6876         | 7  |
| 12 | 1386.6648 | 693.8360        | 1369.6383      | 685.3228         | 1368.6543      | 684.8308         | D    | 675.2944  | 338.1508        | 658.2679       | 329.6376         | 657.2838       | 329.1456         | 6  |
| 13 | 1483.7176 | 742.3624        | 1466.6910      | 733.8492         | 1465.7070      | 733.3571         | P    | 560.2675  | 280.6374        | 543.2409       | 272.1241         | 542.2569       | 271.6321         | 5  |
| 14 | 1597.7605 | 799.3839        | 1580.7340      | 790.8706         | 1579.7499      | 790.3786         | N    | 463.2147  | 232.1110        | 446.1882       | 223.5977         | 445.2041       | 223.1057         | 4  |
| 15 | 1712.7875 | 856.8974        | 1695.7609      | 848.3841         | 1694.7769      | 847.8921         | D    | 349.1718  | 175.0895        | 332.1452       | 166.5763         | 331.1612       | 166.0842         | 3  |
| 16 | 1799.8195 | 900.4134        | 1782.7929      | 891.9001         | 1781.8089      | 891.4081         | S    | 234.1448  | 117.5761        | 217.1183       | 109.0628         | 216.1343       | 108.5708         | 2  |
| 17 |           |                 |                |                  |                |                  | K    | 147.1128  | 74.0600         | 130.0863       | 65.5468          |                |                  | 1  |

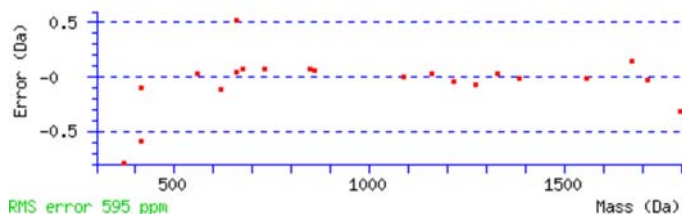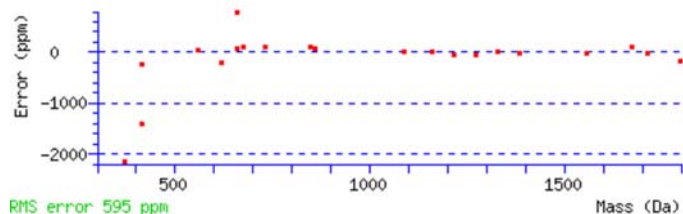

NCBI BLAST search of [HHNEVDLLEAIDPNDSK](#)

(Parameters: blastp, nr protein database, expect=20000, no filter, PAM30)

Other BLAST [web gateways](#)

**All matches to this query**

| Score | Mr(calc): | Delta   | Sequence                             |
|-------|-----------|---------|--------------------------------------|
| 59.0  | 1944.9177 | 1.4850  | <a href="#">HHNEVDLLEAIDPNDSK</a>    |
| 16.2  | 1945.9857 | 0.4170  | <a href="#">YGKLVNLGGNAGEQGVQDK</a>  |
| 5.3   | 1946.9619 | -0.5592 | <a href="#">EAQALCTEIVTQTGDLQK</a>   |
| 4.4   | 1945.0675 | 1.3352  | <a href="#">MASVCAVARVLLCLNVVK</a>   |
| 3.8   | 1945.0376 | 1.3651  | <a href="#">GVVIVMNIMQADKSLAEK</a>   |
| 3.5   | 1945.0057 | 1.3970  | <a href="#">QEIADRLNAWIIFNDK</a>     |
| 3.0   | 1944.9727 | 1.4300  | <a href="#">NCFHLTQLDLSDNKLK</a>     |
| 2.5   | 1945.0343 | 1.3685  | <a href="#">REMEVLTDLWLTQALK</a>     |
| 2.4   | 1947.1445 | -0.7417 | <a href="#">VVELIYIDIVGLAQFVK</a>    |
| 1.3   | 1946.0320 | 0.3707  | <a href="#">GGEGISEAGAKTTVGAVLTK</a> |

Mascot: <http://www.matrixscience.com/>

# MASCOT SCIENCE Mascot Search Results

## Peptide View

MS/MS Fragmentation of **HHQEEIDHHK**

Found in [gi|113678121|ref|NP\\_001038324.1](#), ATPase inhibitory factor 1-like [Danio rerio]

Match to Query 17848: 1309.302724 from(655.658638,2+) index(154868)

Data file TCDD\_0531.dta

Click mouse within plot area to zoom in by factor of two about that point

Or, Plot from  to  Da

Label all possible matches  Label matches used for scoring

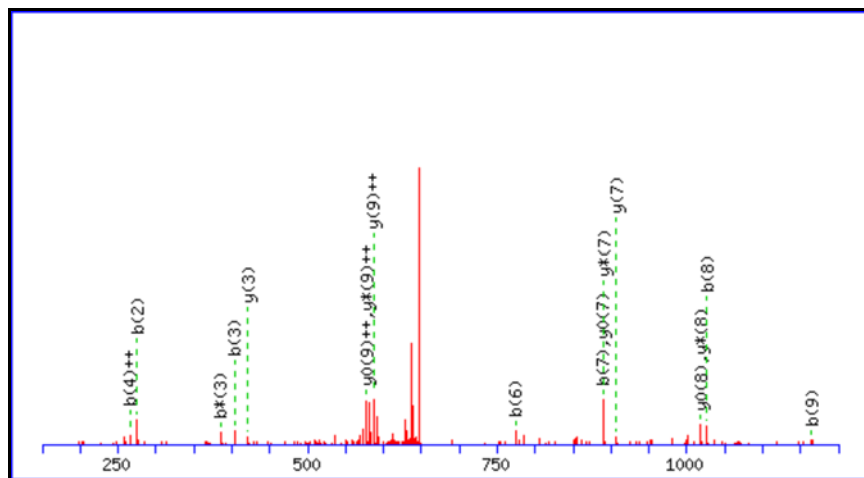

Monoisotopic mass of neutral peptide Mr(calc): 1308.5959

Ions Score: 44 Expect: 0.012

Matches : 17/92 fragment ions using 20 most intense peaks ([help](#))

| #  | b                | b <sup>++</sup> | b <sup>*</sup>  | b <sup>*++</sup> | b <sup>0</sup> | b <sup>0++</sup> | Seq. | y               | y <sup>++</sup> | y <sup>*</sup>   | y <sup>*++</sup> | y <sup>0</sup>   | y <sup>0++</sup> | #  |
|----|------------------|-----------------|-----------------|------------------|----------------|------------------|------|-----------------|-----------------|------------------|------------------|------------------|------------------|----|
| 1  | 138.0662         | 69.5367         |                 |                  |                |                  | H    |                 |                 |                  |                  |                  |                  | 10 |
| 2  | <b>275.1251</b>  | 138.0662        |                 |                  |                |                  | H    | 1172.5443       | <b>586.7758</b> | 1155.5178        | <b>578.2625</b>  | 1154.5337        | <b>577.7705</b>  | 9  |
| 3  | <b>403.1837</b>  | 202.0955        | <b>386.1571</b> | 193.5822         |                |                  | Q    | 1035.4854       | 518.2463        | <b>1018.4589</b> | 509.7331         | <b>1017.4748</b> | 509.2411         | 8  |
| 4  | 532.2263         | <b>266.6168</b> | 515.1997        | 258.1035         | 514.2157       | 257.6115         | E    | <b>907.4268</b> | 454.2170        | <b>890.4003</b>  | 445.7038         | <b>889.4163</b>  | 445.2118         | 7  |
| 5  | 661.2689         | 331.1381        | 644.2423        | 322.6248         | 643.2583       | 322.1328         | E    | 778.3842        | 389.6958        | 761.3577         | 381.1825         | 760.3737         | 380.6905         | 6  |
| 6  | <b>774.3529</b>  | 387.6801        | 757.3264        | 379.1668         | 756.3424       | 378.6748         | I    | 649.3416        | 325.1745        | 632.3151         | 316.6612         | 631.3311         | 316.1692         | 5  |
| 7  | <b>889.3799</b>  | 445.1936        | 872.3533        | 436.6803         | 871.3693       | 436.1883         | D    | 536.2576        | 268.6324        | 519.2310         | 260.1191         | 518.2470         | 259.6271         | 4  |
| 8  | <b>1026.4388</b> | 513.7230        | 1009.4122       | 505.2098         | 1008.4282      | 504.7177         | H    | <b>421.2306</b> | 211.1190        | 404.2041         | 202.6057         |                  |                  | 3  |
| 9  | <b>1163.4977</b> | 582.2525        | 1146.4711       | 573.7392         | 1145.4871      | 573.2472         | H    | 284.1717        | 142.5895        | 267.1452         | 134.0762         |                  |                  | 2  |
| 10 |                  |                 |                 |                  |                |                  | K    | 147.1128        | 74.0600         | 130.0863         | 65.5468          |                  |                  | 1  |

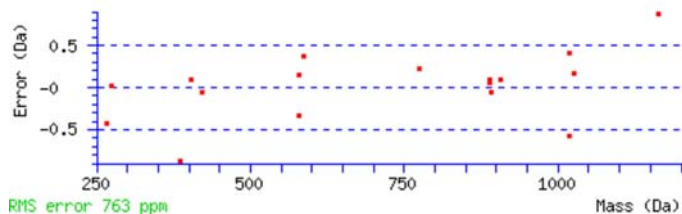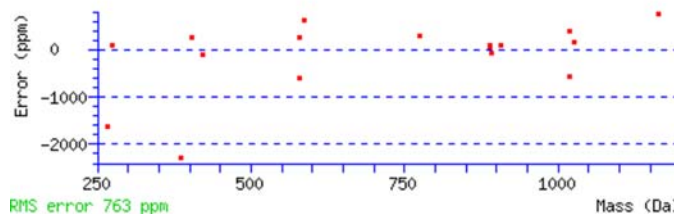

NCBI BLAST search of [HHQEEIDHHK](#)

(Parameters: blastp, nr protein database, expect=20000, no filter, PAM30)

Other BLAST [web gateways](#)

All matches to this query



| Score | Mr(calc): | Delta   | Sequence                      |
|-------|-----------|---------|-------------------------------|
| 43.9  | 1308.5959 | 0.7068  | <a href="#">HHQEEIDHHK</a>    |
| 19.3  | 1308.6561 | 0.6466  | <a href="#">SVESELDQK</a>     |
| 18.7  | 1307.6907 | 1.6120  | <a href="#">SGFKNLLLECK</a>   |
| 18.1  | 1308.5793 | 0.7234  | <a href="#">SGLQDGSSSESQK</a> |
| 16.9  | 1309.5179 | -0.2152 | <a href="#">HQYNCETCQK</a>    |
| 15.6  | 1307.6721 | 1.6306  | <a href="#">GSFKAGDEGSILK</a> |
| 13.0  | 1309.6415 | -0.3388 | <a href="#">DHHFLVGTEAGK</a>  |
| 13.0  | 1309.6336 | -0.3309 | <a href="#">EYEKMLNDLR</a>    |
| 12.9  | 1309.7354 | -0.4327 | <a href="#">SHKLAVTAVEQK</a>  |
| 12.3  | 1309.6375 | -0.3347 | <a href="#">STSQQAQPAHQK</a>  |

Mascot: <http://www.matrixscience.com/>

# MASCOT SCIENCE Mascot Search Results

## Peptide View

MS/MS Fragmentation of **HILDTHGLDPHQATASGPR**

Found in [gi|41056209|ref|NP\\_956854.1](#), hypothetical protein LOC393532 [Danio rerio]

Match to Query 48768: 2023.162724 from(1012.588638,2+) index(64421)

Data file TCDD\_0530.dta

Click mouse within plot area to zoom in by factor of two about that point

Or, Plot from  to  Da

Label all possible matches  Label matches used for scoring

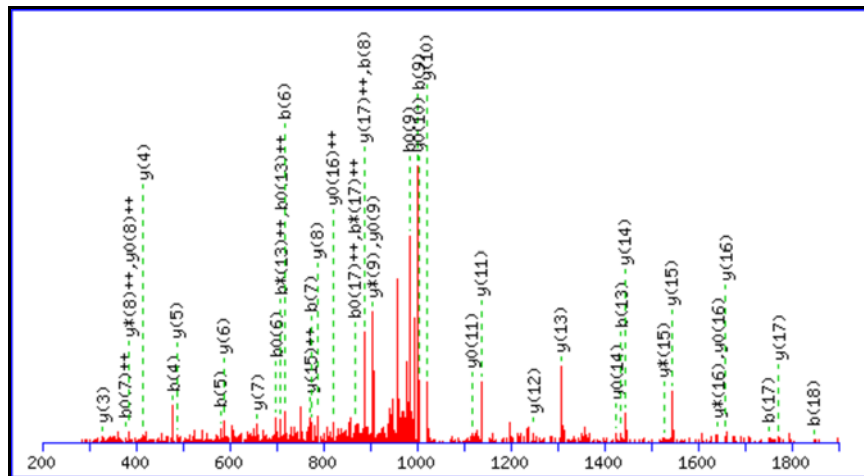

Monoisotopic mass of neutral peptide Mr(calc): 2022.0031

Ions Score: 56 Expect: 0.00059

Matches : 43/182 fragment ions using 112 most intense peaks [\(help\)](#)

| #  | b         | b <sup>++</sup> | b <sup>*</sup> | b <sup>*++</sup> | b <sup>0</sup> | b <sup>0++</sup> | Seq. | y         | y <sup>++</sup> | y <sup>*</sup> | y <sup>*++</sup> | y <sup>0</sup> | y <sup>0++</sup> | #  |
|----|-----------|-----------------|----------------|------------------|----------------|------------------|------|-----------|-----------------|----------------|------------------|----------------|------------------|----|
| 1  | 138.0662  | 69.5367         |                |                  |                |                  | H    |           |                 |                |                  |                |                  | 19 |
| 2  | 251.1503  | 126.0788        |                |                  |                |                  | I    | 1885.9515 | 943.4794        | 1868.9250      | 934.9661         | 1867.9409      | 934.4741         | 18 |
| 3  | 364.2343  | 182.6208        |                |                  |                |                  | L    | 1772.8674 | 886.9374        | 1755.8409      | 878.4241         | 1754.8569      | 877.9321         | 17 |
| 4  | 479.2613  | 240.1343        |                |                  | 461.2507       | 231.1290         | D    | 1659.7834 | 830.3953        | 1642.7568      | 821.8821         | 1641.7728      | 821.3900         | 16 |
| 5  | 580.3089  | 290.6581        |                |                  | 562.2984       | 281.6528         | T    | 1544.7564 | 772.8819        | 1527.7299      | 764.3686         | 1526.7459      | 763.8766         | 15 |
| 6  | 717.3678  | 359.1876        |                |                  | 699.3573       | 350.1823         | H    | 1443.7088 | 722.3580        | 1426.6822      | 713.8447         | 1425.6982      | 713.3527         | 14 |
| 7  | 774.3893  | 387.6983        |                |                  | 756.3787       | 378.6930         | G    | 1306.6498 | 653.8286        | 1289.6233      | 645.3153         | 1288.6393      | 644.8233         | 13 |
| 8  | 887.4734  | 444.2403        |                |                  | 869.4628       | 435.2350         | L    | 1249.6284 | 625.3178        | 1232.6018      | 616.8046         | 1231.6178      | 616.3125         | 12 |
| 9  | 1002.5003 | 501.7538        |                |                  | 984.4898       | 492.7485         | D    | 1136.5443 | 568.7758        | 1119.5178      | 560.2625         | 1118.5337      | 559.7705         | 11 |
| 10 | 1099.5531 | 550.2802        |                |                  | 1081.5425      | 541.2749         | P    | 1021.5174 | 511.2623        | 1004.4908      | 502.7490         | 1003.5068      | 502.2570         | 10 |
| 11 | 1236.6120 | 618.8096        |                |                  | 1218.6014      | 609.8044         | H    | 924.4646  | 462.7359        | 907.4381       | 454.2227         | 906.4540       | 453.7307         | 9  |
| 12 | 1364.6706 | 682.8389        | 1347.6440      | 674.3257         | 1346.6600      | 673.8336         | Q    | 787.4057  | 394.2065        | 770.3791       | 385.6932         | 769.3951       | 385.2012         | 8  |
| 13 | 1435.7077 | 718.3575        | 1418.6811      | 709.8442         | 1417.6971      | 709.3522         | A    | 659.3471  | 330.1772        | 642.3206       | 321.6639         | 641.3365       | 321.1719         | 7  |
| 14 | 1536.7554 | 768.8813        | 1519.7288      | 760.3680         | 1518.7448      | 759.8760         | T    | 588.3100  | 294.6586        | 571.2835       | 286.1454         | 570.2994       | 285.6534         | 6  |
| 15 | 1607.7925 | 804.3999        | 1590.7659      | 795.8866         | 1589.7819      | 795.3946         | A    | 487.2623  | 244.1348        | 470.2358       | 235.6215         | 469.2518       | 235.1295         | 5  |
| 16 | 1694.8245 | 847.9159        | 1677.7980      | 839.4026         | 1676.8139      | 838.9106         | S    | 416.2252  | 208.6162        | 399.1987       | 200.1030         | 398.2146       | 199.6110         | 4  |
| 17 | 1751.8460 | 876.4266        | 1734.8194      | 867.9134         | 1733.8354      | 867.4213         | G    | 329.1932  | 165.1002        | 312.1666       | 156.5870         |                |                  | 3  |
| 18 | 1848.8987 | 924.9530        | 1831.8722      | 916.4397         | 1830.8882      | 915.9477         | P    | 272.1717  | 136.5895        | 255.1452       | 128.0762         |                |                  | 2  |
| 19 |           |                 |                |                  |                |                  | R    | 175.1190  | 88.0631         | 158.0924       | 79.5498          |                |                  | 1  |

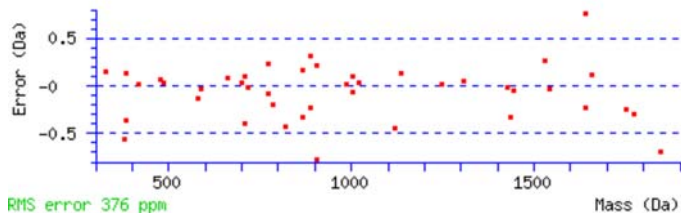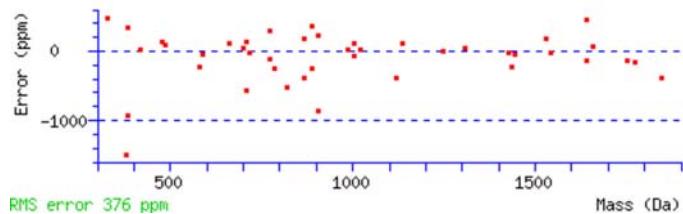

NCBI BLAST search of [HILDTHGLDPHQATASGPR](#)  
 (Parameters: blastp, nr protein database, expect=20000, no filter, PAM30)  
 Other BLAST [web gateways](#)

**All matches to this query**

| Score | Mr(calc): | Delta  | Sequence                            |
|-------|-----------|--------|-------------------------------------|
| 55.5  | 2022.0031 | 1.1596 | <a href="#">HILDTHGLDPHQATASGPR</a> |
| 6.9   | 2020.9856 | 2.1771 | <a href="#">CILIVNCTCTAGISINNGR</a> |
| 3.3   | 2020.9854 | 2.1773 | <a href="#">FSKVITNPQGHFSTDESK</a>  |
| 3.0   | 2021.9039 | 1.2589 | <a href="#">DGEGQWTSSTSVEQARER</a>  |

Mascot: <http://www.matrixscience.com/>

# MASCOT SCIENCE Mascot Search Results

## Peptide View

MS/MS Fragmentation of **HNNLDLVIR**

Found in [gi|50344970|ref|NP\\_001002157.1](#), hypothetical protein LOC415247 [Danio rerio]

Match to Query 13510: 1207.632724 from(604.823638,2+) index(55204)

Data file TCDD\_0530.dta

Click mouse within plot area to zoom in by factor of two about that point

Or, Plot from  to  Da

Label all possible matches  Label matches used for scoring

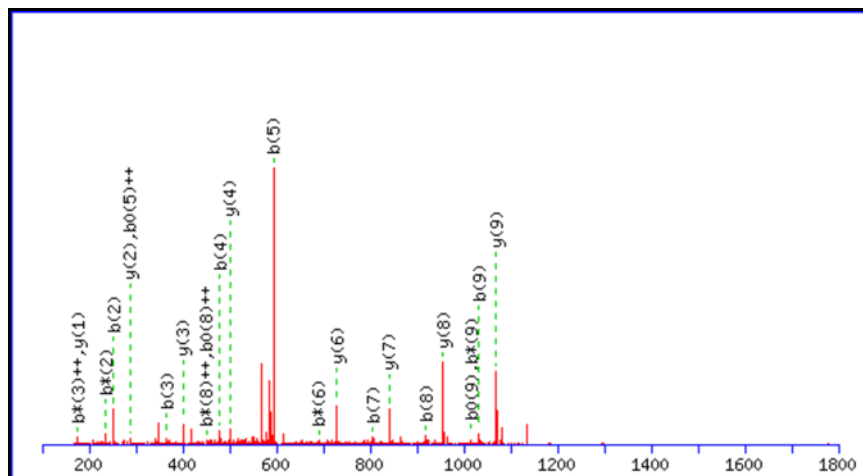

Monoisotopic mass of neutral peptide Mr(calc): 1205.6880

Ions Score: 48 Expect: 0.0046

Matches : 23/88 fragment ions using 42 most intense peaks ([help](#))

| #  | b                | b <sup>++</sup> | b <sup>*</sup>   | b <sup>*++</sup> | b <sup>0</sup>   | b <sup>0++</sup> | Seq. | y                | y <sup>++</sup> | y <sup>*</sup> | y <sup>*++</sup> | y <sup>0</sup> | y <sup>0++</sup> | #  |
|----|------------------|-----------------|------------------|------------------|------------------|------------------|------|------------------|-----------------|----------------|------------------|----------------|------------------|----|
| 1  | 138.0662         | 69.5367         |                  |                  |                  |                  | H    |                  |                 |                |                  |                |                  | 10 |
| 2  | <b>252.1091</b>  | 126.5582        | <b>235.0826</b>  | 118.0449         |                  |                  | N    | <b>1069.6364</b> | 535.3218        | 1052.6099      | 526.8086         | 1051.6259      | 526.3166         | 9  |
| 3  | <b>366.1520</b>  | 183.5797        | 349.1255         | <b>175.0664</b>  |                  |                  | N    | <b>955.5935</b>  | 478.3004        | 938.5669       | 469.7871         | 937.5829       | 469.2951         | 8  |
| 4  | <b>479.2361</b>  | 240.1217        | 462.2096         | 231.6084         |                  |                  | L    | <b>841.5506</b>  | 421.2789        | 824.5240       | 412.7656         | 823.5400       | 412.2736         | 7  |
| 5  | <b>594.2630</b>  | 297.6352        | 577.2365         | 289.1219         | 576.2525         | <b>288.6299</b>  | D    | <b>728.4665</b>  | 364.7369        | 711.4400       | 356.2236         | 710.4559       | 355.7316         | 6  |
| 6  | 707.3471         | 354.1772        | <b>690.3206</b>  | 345.6639         | 689.3365         | 345.1719         | L    | 613.4396         | 307.2234        | 596.4130       | 298.7101         |                |                  | 5  |
| 7  | <b>806.4155</b>  | 403.7114        | 789.3890         | 395.1981         | 788.4050         | 394.7061         | V    | <b>500.3555</b>  | 250.6814        | 483.3289       | 242.1681         |                |                  | 4  |
| 8  | <b>919.4996</b>  | 460.2534        | 902.4730         | <b>451.7402</b>  | 901.4890         | <b>451.2482</b>  | I    | <b>401.2871</b>  | 201.1472        | 384.2605       | 192.6339         |                |                  | 3  |
| 9  | <b>1032.5837</b> | 516.7955        | <b>1015.5571</b> | 508.2822         | <b>1014.5731</b> | 507.7902         | I    | <b>288.2030</b>  | 144.6051        | 271.1765       | 136.0919         |                |                  | 2  |
| 10 |                  |                 |                  |                  |                  |                  | R    | <b>175.1190</b>  | 88.0631         | 158.0924       | 79.5498          |                |                  | 1  |

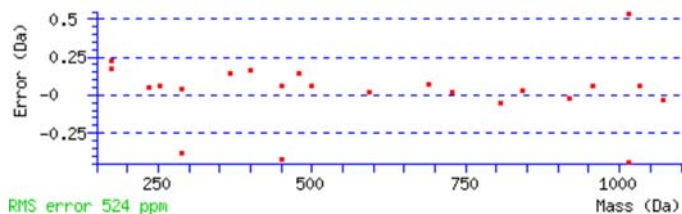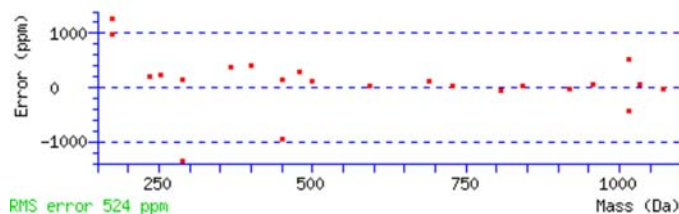

NCBI BLAST search of [HNNLDLVIR](#)

(Parameters: blastp, nr protein database, expect=20000, no filter, PAM30)

Other BLAST [web gateways](#)

All matches to this query

| Score | Mr(calc): | Delta  | Sequence                     |
|-------|-----------|--------|------------------------------|
| 48.4  | 1205.6880 | 1.9447 | <a href="#">HNNLDLVIIR</a>   |
| 13.9  | 1205.7244 | 1.9083 | <a href="#">HLDALLKQIR</a>   |
| 13.9  | 1206.6357 | 0.9970 | <a href="#">GITEGHIVEPR</a>  |
| 13.1  | 1207.6197 | 0.0130 | <a href="#">SSDINQYIIR</a>   |
| 10.9  | 1205.7972 | 1.8355 | <a href="#">LINRPILVLR</a>   |
| 10.9  | 1205.7972 | 1.8355 | <a href="#">LINRPLIVLR</a>   |
| 10.8  | 1206.6431 | 0.9897 | <a href="#">LIDFGCASIIR</a>  |
| 9.7   | 1206.5856 | 1.0472 | <a href="#">HLDFFEMLR</a>    |
| 9.2   | 1206.6179 | 1.0148 | <a href="#">LCAGAFQAQTLR</a> |
| 8.6   | 1206.6469 | 0.9858 | <a href="#">GSVRGIASSFAR</a> |

Mascot: <http://www.matrixscience.com/>

# Mascot Search Results

## Peptide View

MS/MS Fragmentation of **HVINFDLPSDIEEYVHR**

Found in [gi|125995404|ref|NP\\_001075099.1](#), DEAD (Asp-Glu-Ala-Asp) box polypeptide 3 [Danio rerio]

Match to Query 51635: 2082.302724 from(695.108184,3+) index(47145)

Data file TCDD\_0530.dta

Click mouse within plot area to zoom in by factor of two about that point

Or, Plot from  to  Da

Label all possible matches  Label matches used for scoring

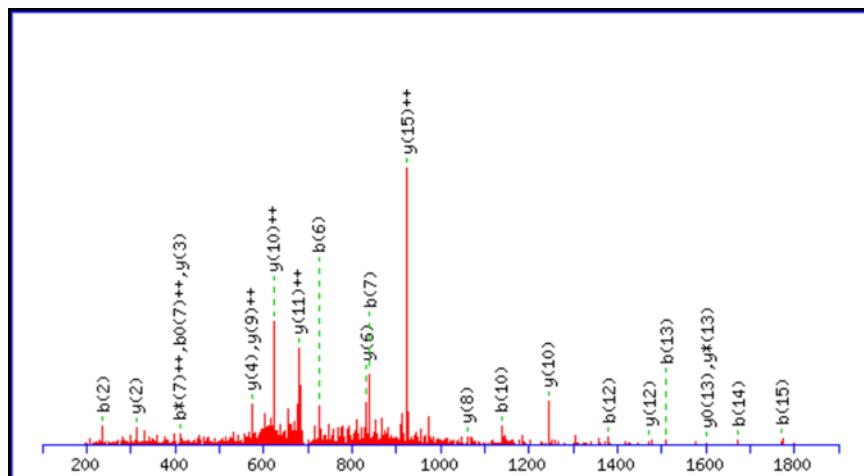

Monoisotopic mass of neutral peptide Mr(calc): 2082.0170

Ions Score: 50 Expect: 0.002

Matches : 23/168 fragment ions using 33 most intense peaks ([help](#))

| #  | b                | b <sup>++</sup> | b <sup>*</sup> | b <sup>*++</sup> | b <sup>0</sup> | b <sup>0++</sup> | Seq. | y                | y <sup>++</sup> | y <sup>*</sup>   | y <sup>*++</sup> | y <sup>0</sup>   | y <sup>0++</sup> | #  |
|----|------------------|-----------------|----------------|------------------|----------------|------------------|------|------------------|-----------------|------------------|------------------|------------------|------------------|----|
| 1  | 138.0662         | 69.5367         |                |                  |                |                  | H    |                  |                 |                  |                  |                  |                  | 17 |
| 2  | <b>237.1346</b>  | 119.0709        |                |                  |                |                  | V    | 1945.9654        | 973.4863        | 1928.9389        | 964.9731         | 1927.9549        | 964.4811         | 16 |
| 3  | 350.2187         | 175.6130        |                |                  |                |                  | I    | 1846.8970        | <b>923.9521</b> | 1829.8705        | 915.4389         | 1828.8864        | 914.9469         | 15 |
| 4  | 464.2616         | 232.6344        | 447.2350       | 224.1212         |                |                  | N    | 1733.8129        | 867.4101        | 1716.7864        | 858.8968         | 1715.8024        | 858.4048         | 14 |
| 5  | 611.3300         | 306.1686        | 594.3035       | 297.6554         |                |                  | F    | 1619.7700        | 810.3886        | <b>1602.7435</b> | 801.8754         | <b>1601.7594</b> | 801.3834         | 13 |
| 6  | <b>726.3569</b>  | 363.6821        | 709.3304       | 355.1688         | 708.3464       | 354.6768         | D    | <b>1472.7016</b> | 736.8544        | 1455.6751        | 728.3412         | 1454.6910        | 727.8492         | 12 |
| 7  | <b>839.4410</b>  | 420.2241        | 822.4145       | <b>411.7109</b>  | 821.4304       | <b>411.2189</b>  | L    | 1357.6747        | <b>679.3410</b> | 1340.6481        | 670.8277         | 1339.6641        | 670.3357         | 11 |
| 8  | 936.4938         | 468.7505        | 919.4672       | 460.2373         | 918.4832       | 459.7452         | P    | <b>1244.5906</b> | <b>622.7989</b> | 1227.5640        | 614.2857         | 1226.5800        | 613.7937         | 10 |
| 9  | 1023.5258        | 512.2665        | 1006.4993      | 503.7533         | 1005.5152      | 503.2613         | S    | 1147.5378        | <b>574.2726</b> | 1130.5113        | 565.7593         | 1129.5273        | 565.2673         | 9  |
| 10 | <b>1138.5527</b> | 569.7800        | 1121.5262      | 561.2667         | 1120.5422      | 560.7747         | D    | <b>1060.5058</b> | 530.7565        | 1043.4793        | 522.2433         | 1042.4952        | 521.7513         | 8  |
| 11 | 1251.6368        | 626.3220        | 1234.6103      | 617.8088         | 1233.6262      | 617.3168         | I    | 945.4789         | 473.2431        | 928.4523         | 464.7298         | 927.4683         | 464.2378         | 7  |
| 12 | <b>1380.6794</b> | 690.8433        | 1363.6529      | 682.3301         | 1362.6688      | 681.8381         | E    | <b>832.3948</b>  | 416.7010        | 815.3682         | 408.1878         | 814.3842         | 407.6958         | 6  |
| 13 | <b>1509.7220</b> | 755.3646        | 1492.6955      | 746.8514         | 1491.7114      | 746.3594         | E    | 703.3522         | 352.1797        | 686.3257         | 343.6665         | 685.3416         | 343.1745         | 5  |
| 14 | <b>1672.7853</b> | 836.8963        | 1655.7588      | 828.3830         | 1654.7748      | 827.8910         | Y    | <b>574.3096</b>  | 287.6584        | 557.2831         | 279.1452         |                  |                  | 4  |
| 15 | <b>1771.8537</b> | 886.4305        | 1754.8272      | 877.9172         | 1753.8432      | 877.4252         | V    | <b>411.2463</b>  | 206.1268        | 394.2197         | 197.6135         |                  |                  | 3  |
| 16 | 1908.9127        | 954.9600        | 1891.8861      | 946.4467         | 1890.9021      | 945.9547         | H    | <b>312.1779</b>  | 156.5926        | 295.1513         | 148.0793         |                  |                  | 2  |
| 17 |                  |                 |                |                  |                |                  | R    | 175.1190         | 88.0631         | 158.0924         | 79.5498          |                  |                  | 1  |

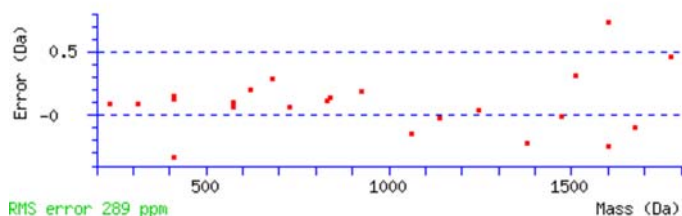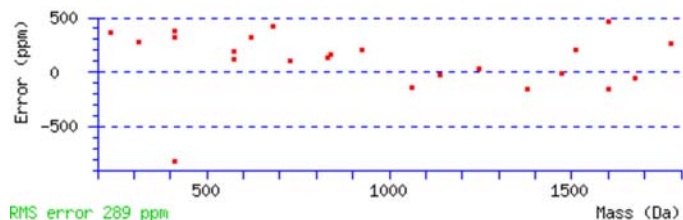

NCBI BLAST search of [HVINFDLPSDIEEYVHR](#)

(Parameters: blastp, nr protein database, expect=20000, no filter, PAM30)

Other BLAST [web gateways](#)

**All matches to this query**

| Score | Mr(calc): | Delta   | Sequence                                |
|-------|-----------|---------|-----------------------------------------|
| 50.2  | 2082.0170 | 0.2857  | <a href="#">HVINFDLPSDIEEYVHR</a>       |
| 9.4   | 2082.9858 | -0.6831 | <a href="#">VHSSYFEGKQVSLTDDGSK</a>     |
| 6.7   | 2084.0223 | -1.7196 | <a href="#">MWGHLSEGYGKLCIYK</a>        |
| 4.9   | 2081.0000 | 1.3027  | <a href="#">LKYTVTADGCSKPNGEWGR</a>     |
| 4.8   | 2082.9979 | -0.6952 | <a href="#">THEIIHTGEKPFACNVCGK</a>     |
| 4.8   | 2082.0858 | 0.2169  | <a href="#">GSPGPDGPLGLAGAPPPGVIGSR</a> |
| 3.2   | 2079.9201 | 2.3826  | <a href="#">NGCTDVKEGPVSDMSTLDR</a>     |
| 2.0   | 2081.0841 | 1.2187  | <a href="#">GHAVCPVNLPTTDVVIHR</a>      |
| 1.6   | 2080.1317 | 2.1711  | <a href="#">FIRNFSQLAAPLTSLSK</a>       |
| 1.6   | 2084.0572 | -1.7545 | <a href="#">GETLLTLLHSPSITDNMSR</a>     |

Mascot: <http://www.matrixscience.com/>

# Mascot Search Results

## Peptide View

MS/MS Fragmentation of **IDAQEAEANK**

Found in **gi|41152334|ref|NP\_956996.1**, ATP synthase, H<sup>+</sup> transporting, mitochondrial F0 complex, subunit d [Danio rerio]

Match to Query 11005: 1144.852724 from(573.433638,2+) index(8256)

Data file TCDD\_0530.dta

Click mouse within plot area to zoom in by factor of two about that point

Or,   to  Da

Label all possible matches  Label matches used for scoring

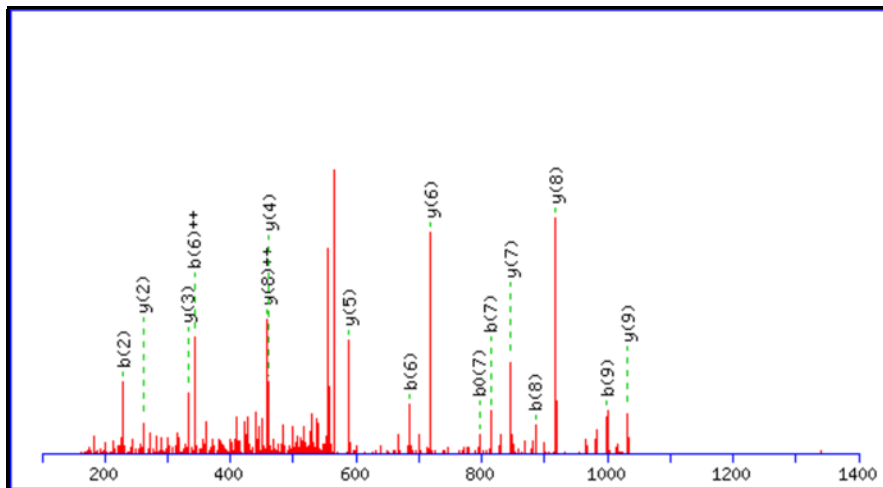

Monoisotopic mass of neutral peptide  $M_r(\text{calc})$ : 1144.5360

Ions Score: 64 Expect: 0.00013

Matches : 16/94 fragment ions using 27 most intense peaks [\(help\)](#)

| #  | b               | b <sup>++</sup> | b*       | b <sup>*++</sup> | b <sup>0</sup>  | b <sup>0++</sup> | Seq. | y                | y <sup>++</sup> | y*        | y <sup>*++</sup> | y <sup>0</sup> | y <sup>0++</sup> | #  |
|----|-----------------|-----------------|----------|------------------|-----------------|------------------|------|------------------|-----------------|-----------|------------------|----------------|------------------|----|
| 1  | 114.0913        | 57.5493         |          |                  |                 |                  | I    |                  |                 |           |                  |                |                  | 10 |
| 2  | <b>229.1183</b> | 115.0628        |          |                  | 211.1077        | 106.0575         | D    | <b>1032.4592</b> | 516.7333        | 1015.4327 | 508.2200         | 1014.4487      | 507.7280         | 9  |
| 3  | 300.1554        | 150.5813        |          |                  | 282.1448        | 141.5761         | A    | <b>917.4323</b>  | <b>459.2198</b> | 900.4058  | 450.7065         | 899.4217       | 450.2145         | 8  |
| 4  | 428.2140        | 214.6106        | 411.1874 | 206.0974         | 410.2034        | 205.6053         | Q    | <b>846.3952</b>  | 423.7012        | 829.3686  | 415.1880         | 828.3846       | 414.6959         | 7  |
| 5  | 557.2566        | 279.1319        | 540.2300 | 270.6186         | 539.2460        | 270.1266         | E    | <b>718.3366</b>  | 359.6719        | 701.3101  | 351.1587         | 700.3260       | 350.6667         | 6  |
| 6  | <b>685.3151</b> | <b>343.1612</b> | 668.2886 | 334.6479         | 667.3046        | 334.1559         | Q    | <b>589.2940</b>  | 295.1506        | 572.2675  | 286.6374         | 571.2835       | 286.1454         | 5  |
| 7  | <b>814.3577</b> | 407.6825        | 797.3312 | 399.1692         | <b>796.3472</b> | 398.6772         | E    | <b>461.2354</b>  | 231.1214        | 444.2089  | 222.6081         | 443.2249       | 222.1161         | 4  |
| 8  | <b>885.3949</b> | 443.2011        | 868.3683 | 434.6878         | 867.3843        | 434.1958         | A    | <b>332.1928</b>  | 166.6001        | 315.1663  | 158.0868         |                |                  | 3  |
| 9  | <b>999.4378</b> | 500.2225        | 982.4112 | 491.7093         | 981.4272        | 491.2172         | N    | <b>261.1557</b>  | 131.0815        | 244.1292  | 122.5682         |                |                  | 2  |
| 10 |                 |                 |          |                  |                 |                  | K    | 147.1128         | 74.0600         | 130.0863  | 65.5468          |                |                  | 1  |

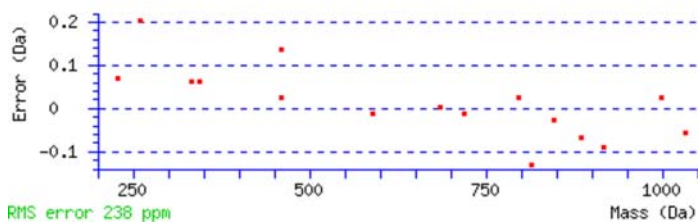



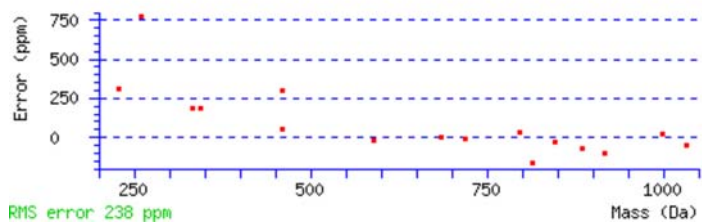

NCBI BLAST search of [IDAQEQEANK](#)

(Parameters: blastp, nr protein database, expect=20000, no filter, PAM30)

Other BLAST [web gateways](#)

**All matches to this query**

| Score | Mr(calc): | Delta   | Sequence                    |
|-------|-----------|---------|-----------------------------|
| 64.4  | 1144.5360 | 0.3167  | <a href="#">IDAQEQEANK</a>  |
| 16.6  | 1145.5677 | -0.7149 | <a href="#">NADRLDTVDK</a>  |
| 16.2  | 1145.5425 | -0.6898 | <a href="#">DLNRADEASR</a>  |
| 13.5  | 1143.6499 | 1.2028  | <a href="#">SNILQESLIK</a>  |
| 13.1  | 1144.6339 | 0.2188  | <a href="#">LELTDLKADK</a>  |
| 12.7  | 1143.4979 | 1.3548  | <a href="#">VEETCVGHDR</a>  |
| 12.6  | 1144.6240 | 0.2287  | <a href="#">QQGLYPAAGLK</a> |
| 12.5  | 1144.6339 | 0.2188  | <a href="#">LNSLTEELVK</a>  |
| 11.9  | 1142.6594 | 2.1933  | <a href="#">LICAVKQVGR</a>  |
| 11.8  | 1145.5789 | -0.7261 | <a href="#">DLNNRAQTSK</a>  |

Mascot: <http://www.matrixscience.com/>

# MASCOT SCIENCE Mascot Search Results

## Peptide View

MS/MS Fragmentation of **IEFSPLDAWNSGVQK**

Found in [gi|113678245|ref|NP\\_001038338.1](#), hypothetical protein LOC558738 [Danio rerio]

Match to Query 29531: 1690.452724 from(846.233638,2+) index(20092)

Data file TCDD\_0530.dta

Click mouse within plot area to zoom in by factor of two about that point

Or, Plot from  to  Da

Label all possible matches  Label matches used for scoring

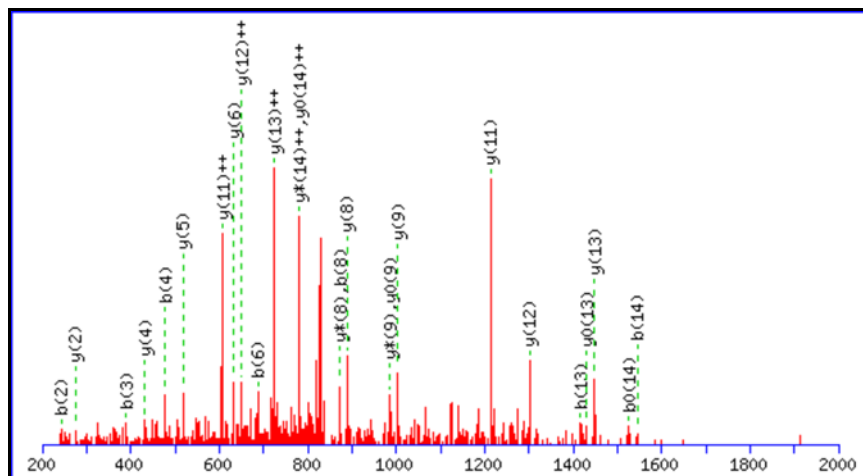

Monoisotopic mass of neutral peptide Mr(calc): 1689.8362

Ions Score: 57 Expect: 0.00055

Matches : 26/140 fragment ions using 43 most intense peaks ([help](#))

| #  | b                | b <sup>++</sup> | b <sup>*</sup> | b <sup>*++</sup> | b <sup>0</sup>   | b <sup>0++</sup> | Seq. | y                | y <sup>++</sup> | y <sup>*</sup>  | y <sup>*++</sup> | y <sup>0</sup>   | y <sup>0++</sup> | #  |
|----|------------------|-----------------|----------------|------------------|------------------|------------------|------|------------------|-----------------|-----------------|------------------|------------------|------------------|----|
| 1  | 114.0913         | 57.5493         |                |                  |                  |                  | I    |                  |                 |                 |                  |                  |                  | 15 |
| 2  | <b>243.1339</b>  | 122.0706        |                |                  | 225.1234         | 113.0653         | E    | 1577.7594        | 789.3834        | 1560.7329       | <b>780.8701</b>  | 1559.7489        | <b>780.3781</b>  | 14 |
| 3  | <b>390.2023</b>  | 195.6048        |                |                  | 372.1918         | 186.5995         | F    | <b>1448.7169</b> | <b>724.8621</b> | 1431.6903       | 716.3488         | <b>1430.7063</b> | 715.8568         | 13 |
| 4  | <b>477.2344</b>  | 239.1208        |                |                  | 459.2238         | 230.1155         | S    | <b>1301.6484</b> | <b>651.3279</b> | 1284.6219       | 642.8146         | 1283.6379        | 642.3226         | 12 |
| 5  | 574.2871         | 287.6472        |                |                  | 556.2766         | 278.6419         | P    | <b>1214.6164</b> | <b>607.8118</b> | 1197.5899       | 599.2986         | 1196.6058        | 598.8066         | 11 |
| 6  | <b>687.3712</b>  | 344.1892        |                |                  | 669.3606         | 335.1840         | L    | 1117.5636        | 559.2855        | 1100.5371       | 550.7722         | 1099.5531        | 550.2802         | 10 |
| 7  | 802.3981         | 401.7027        |                |                  | 784.3876         | 392.6974         | D    | <b>1004.4796</b> | 502.7434        | <b>987.4530</b> | 494.2302         | <b>986.4690</b>  | 493.7381         | 9  |
| 8  | <b>873.4353</b>  | 437.2213        |                |                  | 855.4247         | 428.2160         | A    | <b>889.4526</b>  | 445.2300        | <b>872.4261</b> | 436.7167         | 871.4421         | 436.2247         | 8  |
| 9  | 1059.5146        | 530.2609        |                |                  | 1041.5040        | 521.2556         | W    | 818.4155         | 409.7114        | 801.3890        | 401.1981         | 800.4050         | 400.7061         | 7  |
| 10 | 1173.5575        | 587.2824        | 1156.5310      | 578.7691         | 1155.5469        | 578.2771         | N    | <b>632.3362</b>  | 316.6717        | 615.3097        | 308.1585         | 614.3257         | 307.6665         | 6  |
| 11 | 1260.5895        | 630.7984        | 1243.5630      | 622.2851         | 1242.5790        | 621.7931         | S    | <b>518.2933</b>  | 259.6503        | 501.2667        | 251.1370         | 500.2827         | 250.6450         | 5  |
| 12 | 1317.6110        | 659.3091        | 1300.5844      | 650.7959         | 1299.6004        | 650.3039         | G    | <b>431.2613</b>  | 216.1343        | 414.2347        | 207.6210         |                  |                  | 4  |
| 13 | <b>1416.6794</b> | 708.8433        | 1399.6529      | 700.3301         | 1398.6688        | 699.8381         | V    | 374.2398         | 187.6235        | 357.2132        | 179.1103         |                  |                  | 3  |
| 14 | <b>1544.7380</b> | 772.8726        | 1527.7114      | 764.3594         | <b>1526.7274</b> | 763.8673         | Q    | <b>275.1714</b>  | 138.0893        | 258.1448        | 129.5761         |                  |                  | 2  |
| 15 |                  |                 |                |                  |                  |                  | K    | 147.1128         | 74.0600         | 130.0863        | 65.5468          |                  |                  | 1  |

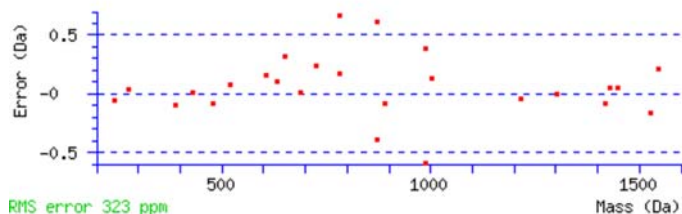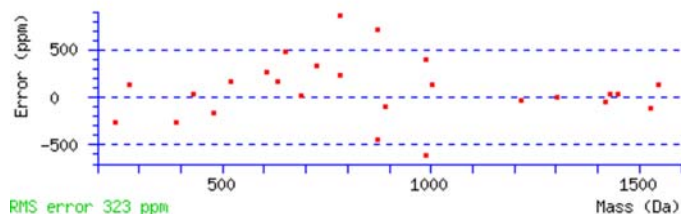

NCBI BLAST search of [IEFSPLDAWNSGVQK](#)  
 (Parameters: blastp, nr protein database, expect=20000, no filter, PAM30)  
 Other BLAST [web gateways](#)

**All matches to this query**

| Score | Mr(calc): | Delta   | Sequence                         |
|-------|-----------|---------|----------------------------------|
| 56.9  | 1689.8362 | 0.6165  | <a href="#">IEFSPLDAWNSGVQK</a>  |
| 14.1  | 1690.7468 | -0.2941 | <a href="#">ELFSASSTDSCSRSSK</a> |
| 10.7  | 1692.7923 | -2.3396 | <a href="#">MLEGGPRSSSAVSCQK</a> |
| 9.8   | 1688.8403 | 1.6124  | <a href="#">ELMEEQINKSVAGNK</a>  |
| 7.3   | 1688.9475 | 1.5053  | <a href="#">QLFVTPHPQRITPR</a>   |
| 6.5   | 1690.8236 | -0.3708 | <a href="#">ELEQASWAKMELEK</a>   |
| 6.4   | 1688.7853 | 1.6674  | <a href="#">ELEDNDPNISSITR</a>   |
| 5.6   | 1688.9308 | 1.5219  | <a href="#">LERLNLSTSLSEIK</a>   |
| 4.3   | 1688.8733 | 1.5794  | <a href="#">KIFVGGLNPETTEER</a>  |
| 4.2   | 1689.8243 | 0.6284  | <a href="#">ELEETLKQLENNCK</a>   |

Mascot: <http://www.matrixscience.com/>

# MATRIX SCIENCE Mascot Search Results

## Peptide View

MS/MS Fragmentation of **IFLEDNGLPVHIK**

Found in **gi|68379126|ref|XP\_693548.1**, PREDICTED: hypothetical protein LOC767664 [Danio rerio]

Match to Query 22902: 1493.862724 from(1494.870000,1+) index(45309)

Data file TCDD\_0530.dta

Click mouse within plot area to zoom in by factor of two about that point

Or, Plot from  to  Da

Label all possible matches  Label matches used for scoring

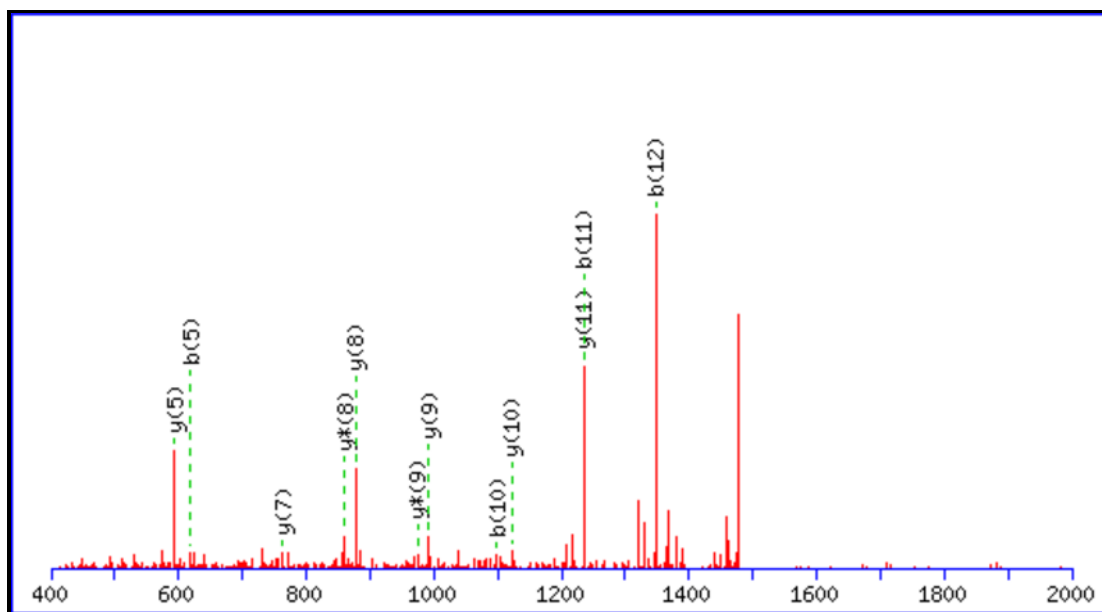

Monoisotopic mass of neutral peptide  $M_r(\text{calc})$ : 1493.8242

Ions Score: 43 Expect: 0.013

Matches : 12/56 fragment ions using 22 most intense peaks ([help](#))

| #  | b                | b*        | b <sup>0</sup> | Seq. | y                | y*              | y <sup>0</sup> | #  |
|----|------------------|-----------|----------------|------|------------------|-----------------|----------------|----|
| 1  | 114.0913         |           |                | I    |                  |                 |                | 13 |
| 2  | 261.1598         |           |                | F    | 1381.7474        | 1364.7209       | 1363.7369      | 12 |
| 3  | 374.2438         |           |                | L    | <b>1234.6790</b> | 1217.6525       | 1216.6684      | 11 |
| 4  | 503.2864         |           | 485.2758       | E    | <b>1121.5949</b> | 1104.5684       | 1103.5844      | 10 |
| 5  | <b>618.3134</b>  |           | 600.3028       | D    | <b>992.5524</b>  | <b>975.5258</b> | 974.5418       | 9  |
| 6  | 732.3563         | 715.3297  | 714.3457       | N    | <b>877.5254</b>  | <b>860.4989</b> |                | 8  |
| 7  | 789.3777         | 772.3512  | 771.3672       | G    | <b>763.4825</b>  | 746.4559        |                | 7  |
| 8  | 902.4618         | 885.4353  | 884.4512       | L    | 706.4610         | 689.4345        |                | 6  |
| 9  | 999.5146         | 982.4880  | 981.5040       | P    | <b>593.3770</b>  | 576.3504        |                | 5  |
| 10 | <b>1098.5830</b> | 1081.5564 | 1080.5724      | V    | 496.3242         | 479.2976        |                | 4  |

|    |                  |           |           |          |          |          |  |          |
|----|------------------|-----------|-----------|----------|----------|----------|--|----------|
| 11 | <b>1235.6419</b> | 1218.6154 | 1217.6313 | <b>H</b> | 397.2558 | 380.2292 |  | <b>3</b> |
| 12 | <b>1348.7260</b> | 1331.6994 | 1330.7154 | <b>I</b> | 260.1969 | 243.1703 |  | <b>2</b> |
| 13 |                  |           |           | <b>K</b> | 147.1128 | 130.0863 |  | <b>1</b> |

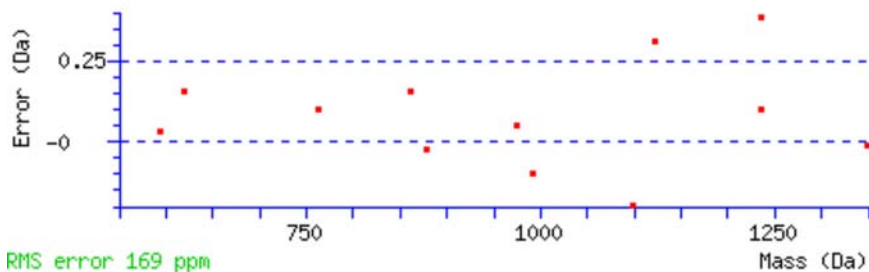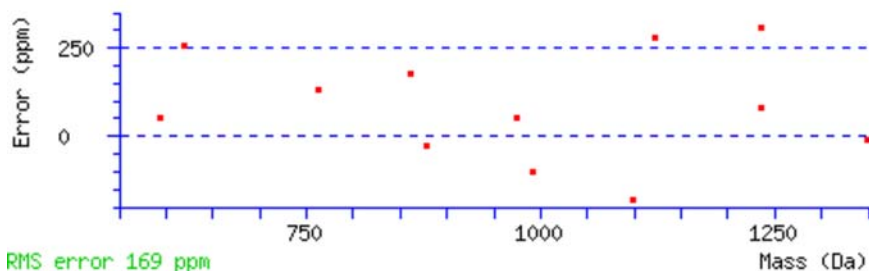

NCBI **BLAST** search of [IFLEDNGLPVHIK](#)

(Parameters: blastp, nr protein database, expect=20000, no filter, PAM30)

Other BLAST [web gateways](#)

**All matches to this query**

| Score | Mr(calc): | Delta   | Sequence                      |
|-------|-----------|---------|-------------------------------|
| 43.1  | 1493.8242 | 0.0385  | <a href="#">IFLEDNGLPVHIK</a> |
| 17.6  | 1493.8136 | 0.0491  | <a href="#">QHLNRNDIMLLK</a>  |
| 15.3  | 1493.8031 | 0.0596  | <a href="#">DGFAKVHYGFILK</a> |
| 15.1  | 1494.7354 | -0.8727 | <a href="#">DLAFEEGVINFNK</a> |
| 10.3  | 1493.6901 | 0.1726  | <a href="#">LTGTCMRNSVPCR</a> |
| 10.2  | 1493.6780 | 0.1847  | <a href="#">ENCSSLREVENK</a>  |
| 9.8   | 1493.7031 | 0.1596  | <a href="#">QMNELSSELQTSK</a> |
| 8.3   | 1494.7215 | -0.8588 | <a href="#">FLAFNNRENQDK</a>  |
| 8.3   | 1493.7734 | 0.0893  | <a href="#">RMCELVLGEFLK</a>  |
| 8.1   | 1493.8354 | 0.0273  | <a href="#">GHDAIVTLLKHYK</a> |

**Mascot:** <http://www.matrixscience.com/>

# MASCOT SCIENCE Mascot Search Results

## Peptide View

MS/MS Fragmentation of **ILLDQGQEHVETPHGVLHVTVHGSGNAR**  
 Found in [gi|56693257|ref|NP\\_001008593.1](#), hypothetical protein LOC494050 [Danio rerio]

Match to Query 111155: 3102.352725 from(1035.124851,3+) index(66976)  
 Data file TCDD\_0530.dta

Click mouse within plot area to zoom in by factor of two about that point

Or, Plot from  to  Da   
 Label all possible matches  Label matches used for scoring

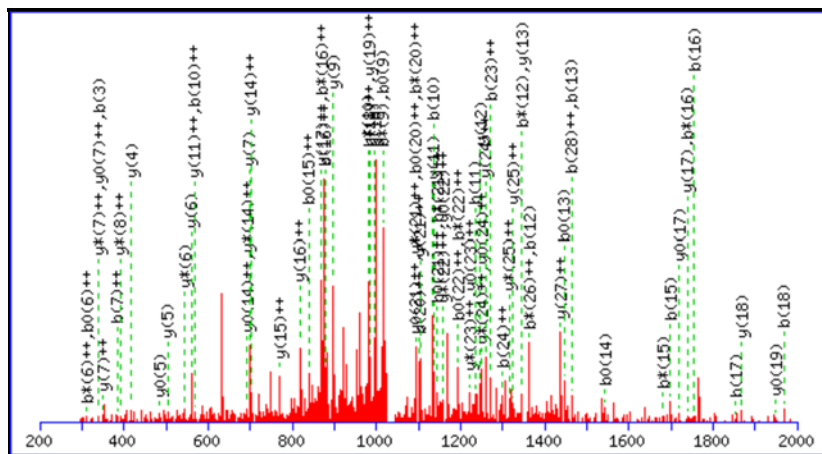

Monoisotopic mass of neutral peptide Mr(calc): 3100.5803  
 Ions Score: 39 Expect: 0.014  
 Matches : 76/314 fragment ions using 169 most intense peaks ([help](#))

| #  | b                | b <sup>++</sup>  | b*               | b <sup>*++</sup> | b <sup>0</sup>   | b <sup>0++</sup> | Seq. | y                | y <sup>++</sup>  | y*              | y <sup>*++</sup> | y <sup>0</sup>   | y <sup>0++</sup> | #  |
|----|------------------|------------------|------------------|------------------|------------------|------------------|------|------------------|------------------|-----------------|------------------|------------------|------------------|----|
| 1  | 114.0913         | 57.5493          |                  |                  |                  |                  | I    |                  |                  |                 |                  |                  |                  | 29 |
| 2  | 227.1754         | 114.0913         |                  |                  |                  |                  | L    | 2988.5035        | 1494.7554        | 2971.4769       | 1486.2421        | 2970.4929        | 1485.7501        | 28 |
| 3  | <b>340.2595</b>  | 170.6334         |                  |                  |                  |                  | L    | 2875.4194        | <b>1438.2133</b> | 2858.3928       | 1429.7001        | 2857.4088        | 1429.2081        | 27 |
| 4  | 455.2864         | 228.1468         |                  |                  | 437.2758         | 219.1416         | D    | 2762.3353        | 1381.6713        | 2745.3088       | 1373.1580        | 2744.3248        | 1372.6660        | 26 |
| 5  | 583.3450         | 292.1761         | 566.3184         | 283.6629         | 565.3344         | 283.1709         | Q    | 2647.3084        | <b>1324.1578</b> | 2630.2818       | <b>1315.6446</b> | 2629.2978        | 1315.1525        | 25 |
| 6  | 640.3665         | 320.6869         | 623.3399         | <b>312.1736</b>  | 622.3559         | <b>311.6816</b>  | G    | 2519.2498        | <b>1260.1285</b> | 2502.2233       | <b>1251.6153</b> | 2501.2392        | <b>1251.1233</b> | 24 |
| 7  | 768.4250         | <b>384.7162</b>  | 751.3985         | 376.2029         | 750.4145         | 375.7109         | Q    | 2462.2283        | 1231.6178        | 2445.2018       | <b>1223.1045</b> | 2444.2178        | <b>1222.6125</b> | 23 |
| 8  | 897.4676         | 449.2375         | 880.4411         | 440.7242         | 879.4571         | 440.2322         | E    | 2334.1698        | 1167.5885        | 2317.1432       | <b>1159.0752</b> | 2316.1592        | <b>1158.5832</b> | 22 |
| 9  | 1034.5265        | 517.7669         | <b>1017.5000</b> | 509.2536         | <b>1016.5160</b> | 508.7616         | H    | 2205.1272        | <b>1103.0672</b> | 2188.1006       | <b>1094.5540</b> | 2187.1166        | <b>1094.0619</b> | 21 |
| 10 | <b>1135.5742</b> | <b>568.2907</b>  | 1118.5477        | 559.7775         | 1117.5637        | 559.2855         | T    | 2068.0683        | 1034.5378        | 2051.0417       | 1026.0245        | 2050.0577        | 1025.5325        | 20 |
| 11 | <b>1234.6426</b> | 617.8250         | 1217.6161        | 609.3117         | 1216.6321        | 608.8197         | V    | 1967.0206        | <b>984.0139</b>  | 1949.9940       | 975.5007         | <b>1949.0100</b> | 975.0086         | 19 |
| 12 | <b>1363.6852</b> | 682.3462         | <b>1346.6587</b> | 673.8330         | 1345.6747        | 673.3410         | E    | <b>1867.9522</b> | 934.4797         | 1850.9256       | 925.9664         | 1849.9416        | 925.4744         | 18 |
| 13 | <b>1464.7329</b> | 732.8701         | 1447.7064        | 724.3568         | <b>1446.7223</b> | 723.8648         | T    | <b>1738.9096</b> | <b>869.9584</b>  | 1721.8830       | 861.4452         | <b>1720.8990</b> | 860.9531         | 17 |
| 14 | 1561.7857        | 781.3965         | 1544.7591        | 772.8832         | <b>1543.7751</b> | 772.3912         | P    | 1637.8619        | <b>819.4346</b>  | 1620.8353       | 810.9213         | 1619.8513        | 810.4293         | 16 |
| 15 | <b>1698.8446</b> | 849.9259         | <b>1681.8180</b> | 841.4127         | 1680.8340        | <b>840.9206</b>  | H    | 1540.8091        | <b>770.9082</b>  | 1523.7826       | 762.3949         | 1522.7986        | 761.9029         | 15 |
| 16 | <b>1755.8660</b> | <b>878.4367</b>  | <b>1738.8395</b> | <b>869.9234</b>  | 1737.8555        | 869.4314         | G    | 1403.7502        | <b>702.3787</b>  | 1386.7237       | <b>693.8655</b>  | 1385.7397        | <b>693.3735</b>  | 14 |
| 17 | <b>1854.9345</b> | 927.9709         | 1837.9079        | 919.4576         | 1836.9239        | 918.9656         | V    | <b>1346.7288</b> | 673.8680         | 1329.7022       | 665.3547         | 1328.7182        | 664.8627         | 13 |
| 18 | <b>1968.0185</b> | <b>984.5129</b>  | 1950.9920        | 975.9996         | 1950.0080        | 975.5076         | L    | <b>1247.6603</b> | 624.3338         | 1230.6338       | 615.8205         | 1229.6498        | 615.3285         | 12 |
| 19 | 2105.0774        | 1053.0424        | 2088.0509        | 1044.5291        | 2087.0669        | 1044.0371        | H    | <b>1134.5763</b> | <b>567.7918</b>  | 1117.5497       | 559.2785         | 1116.5657        | 558.7865         | 11 |
| 20 | 2204.1458        | <b>1102.5766</b> | 2187.1193        | <b>1094.0633</b> | 2186.1353        | <b>1093.5713</b> | V    | <b>997.5174</b>  | 499.2623         | <b>980.4908</b> | 490.7490         | 979.5068         | 490.2570         | 10 |
| 21 | 2305.1935        | 1153.1004        | 2288.1670        | <b>1144.5871</b> | 2287.1830        | <b>1144.0951</b> | T    | <b>898.4490</b>  | 449.7281         | 881.4224        | 441.2148         | 880.4384         | 440.7228         | 9  |
| 22 | 2404.2619        | 1202.6346        | 2387.2354        | <b>1194.1213</b> | 2386.2514        | <b>1193.6293</b> | V    | 797.4013         | 399.2043         | 780.3747        | <b>390.6910</b>  | 779.3907         | 390.1990         | 8  |
| 23 | 2541.3208        | <b>1271.1641</b> | 2524.2943        | 1262.6508        | 2523.3103        | 1262.1588        | H    | <b>698.3329</b>  | <b>349.6701</b>  | 681.3063        | <b>341.1568</b>  | 680.3223         | <b>340.6648</b>  | 7  |
| 24 | 2598.3423        | <b>1299.6748</b> | 2581.3158        | 1291.1615        | 2580.3317        | 1290.6695        | G    | <b>561.2739</b>  | 281.1406         | <b>544.2474</b> | 272.6273         | 543.2634         | 272.1353         | 6  |

|    |           |           |           |           |           |           |   |          |          |          |          |          |          |   |
|----|-----------|-----------|-----------|-----------|-----------|-----------|---|----------|----------|----------|----------|----------|----------|---|
| 25 | 2685.3743 | 1343.1908 | 2668.3478 | 1334.6775 | 2667.3638 | 1334.1855 | S | 504.2525 | 252.6299 | 487.2259 | 244.1166 | 486.2419 | 243.6246 | 5 |
| 26 | 2742.3958 | 1371.7015 | 2725.3693 | 1363.1883 | 2724.3852 | 1362.6963 | G | 417.2205 | 209.1139 | 400.1939 | 200.6006 |          |          | 4 |
| 27 | 2856.4387 | 1428.7230 | 2839.4122 | 1420.2097 | 2838.4282 | 1419.7177 | N | 360.1990 | 180.6031 | 343.1724 | 172.0899 |          |          | 3 |
| 28 | 2927.4758 | 1464.2416 | 2910.4493 | 1455.7283 | 2909.4653 | 1455.2363 | A | 246.1561 | 123.5817 | 229.1295 | 115.0684 |          |          | 2 |
| 29 |           |           |           |           |           |           | R | 175.1190 | 88.0631  | 158.0924 | 79.5498  |          |          | 1 |

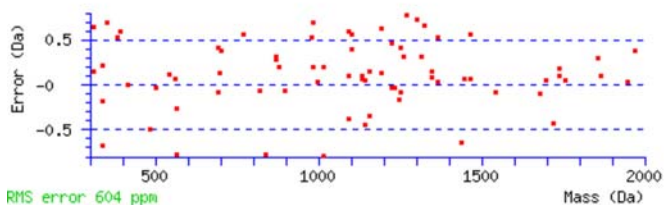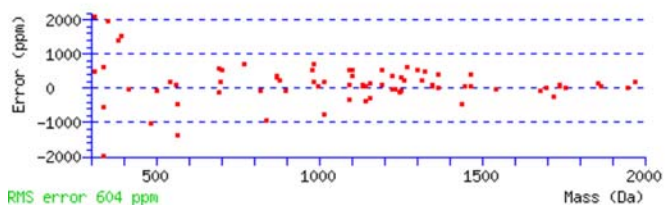

NCBI BLAST search of [ILLDQGQEHVETPHGVLHVTVHGSGNAR](#)  
 (Parameters: blastp, nr protein database, expect=20000, no filter, PAM30)

Other BLAST [web gateways](#)

All matches to this query

| Score | Mr(calc): | Delta   | Sequence                                     |
|-------|-----------|---------|----------------------------------------------|
| 39.3  | 3100.5803 | 1.7724  | <a href="#">ILLDQGQEHVETPHGVLHVTVHGSGNAR</a> |
| 4.3   | 3101.5348 | 0.8180  | <a href="#">SPLYQNCMLACVESRPLPSIGTPEPKSK</a> |
| 2.2   | 3104.5025 | -2.1498 | <a href="#">NMFIIDQHSGEVSLNGLVDFEKANHYK</a>  |
| 1.6   | 3101.5348 | 0.8180  | <a href="#">SPLYQNCMLACVESRPLPSIGTPEPKSK</a> |

Mascot: <http://www.matrixscience.com/>

**Mascot Search Results**

**Peptide View**

MS/MS Fragmentation of **ILVLFYPLEPSQIGK**

Found in [gi|50344950|ref|NP\\_001002147.1](#), hypothetical protein LOC415237 [Danio rerio]

Match to Query 30632: 1716.362724 from(859.188638,2+) index(107543)

Data file TCDD\_0530.dta

Click mouse within plot area to zoom in by factor of two about that point

Or, Plot from  to  Da

Label all possible matches  Label matches used for scoring

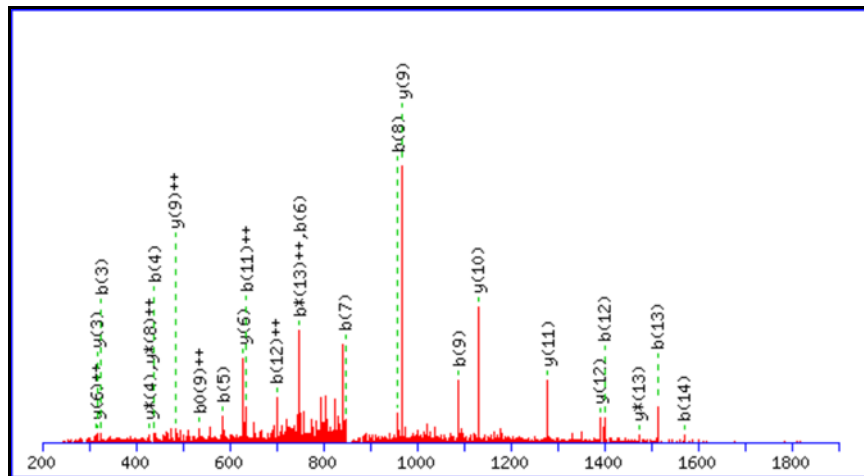

Monoisotopic mass of neutral peptide Mr(calc): 1715.9862

Ions Score: 55 Expect: 0.00083

Matches : 25/122 fragment ions using 43 most intense peaks ([help](#))

| #  | b                | b <sup>++</sup> | b <sup>*</sup> | b <sup>*++</sup> | b <sup>0</sup> | b <sup>0++</sup> | Seq. | y                | y <sup>++</sup> | y <sup>*</sup>   | y <sup>*++</sup> | y <sup>0</sup> | y <sup>0++</sup> | #  |
|----|------------------|-----------------|----------------|------------------|----------------|------------------|------|------------------|-----------------|------------------|------------------|----------------|------------------|----|
| 1  | 114.0913         | 57.5493         |                |                  |                |                  | I    |                  |                 |                  |                  |                |                  | 15 |
| 2  | 227.1754         | 114.0913        |                |                  |                |                  | L    | 1603.9094        | 802.4583        | 1586.8829        | 793.9451         | 1585.8988      | 793.4531         | 14 |
| 3  | <b>326.2438</b>  | 163.6255        |                |                  |                |                  | V    | 1490.8253        | 745.9163        | <b>1473.7988</b> | 737.4030         | 1472.8148      | 736.9110         | 13 |
| 4  | <b>439.3279</b>  | 220.1676        |                |                  |                |                  | L    | <b>1391.7569</b> | 696.3821        | 1374.7304        | 687.8688         | 1373.7464      | 687.3768         | 12 |
| 5  | <b>586.3963</b>  | 293.7018        |                |                  |                |                  | F    | <b>1278.6729</b> | 639.8401        | 1261.6463        | 631.3268         | 1260.6623      | 630.8348         | 11 |
| 6  | <b>749.4596</b>  | 375.2335        |                |                  |                |                  | Y    | <b>1131.6045</b> | 566.3059        | 1114.5779        | 557.7926         | 1113.5939      | 557.3006         | 10 |
| 7  | <b>846.5124</b>  | 423.7598        |                |                  |                |                  | P    | <b>968.5411</b>  | <b>484.7742</b> | 951.5146         | 476.2609         | 950.5306       | 475.7689         | 9  |
| 8  | <b>959.5965</b>  | 480.3019        |                |                  |                |                  | L    | 871.4884         | 436.2478        | 854.4618         | <b>427.7345</b>  | 853.4778       | 427.2425         | 8  |
| 9  | <b>1088.6390</b> | 544.8232        |                |                  | 1070.6285      | <b>535.8179</b>  | E    | 758.4043         | 379.7058        | 741.3777         | 371.1925         | 740.3937       | 370.7005         | 7  |
| 10 | 1185.6918        | 593.3495        |                |                  | 1167.6812      | 584.3443         | P    | <b>629.3617</b>  | <b>315.1845</b> | 612.3352         | 306.6712         | 611.3511       | 306.1792         | 6  |
| 11 | 1272.7238        | <b>636.8656</b> |                |                  | 1254.7133      | 627.8603         | S    | 532.3089         | 266.6581        | 515.2824         | 258.1448         | 514.2984       | 257.6528         | 5  |
| 12 | <b>1400.7824</b> | <b>700.8948</b> | 1383.7559      | 692.3816         | 1382.7719      | 691.8896         | Q    | 445.2769         | 223.1421        | <b>428.2504</b>  | 214.6288         |                |                  | 4  |
| 13 | <b>1513.8665</b> | 757.4369        | 1496.8399      | <b>748.9236</b>  | 1495.8559      | 748.4316         | I    | <b>317.2183</b>  | 159.1128        | 300.1918         | 150.5995         |                |                  | 3  |
| 14 | <b>1570.8879</b> | 785.9476        | 1553.8614      | 777.4343         | 1552.8774      | 776.9423         | G    | 204.1343         | 102.5708        | 187.1077         | 94.0575          |                |                  | 2  |
| 15 |                  |                 |                |                  |                |                  | K    | 147.1128         | 74.0600         | 130.0863         | 65.5468          |                |                  | 1  |



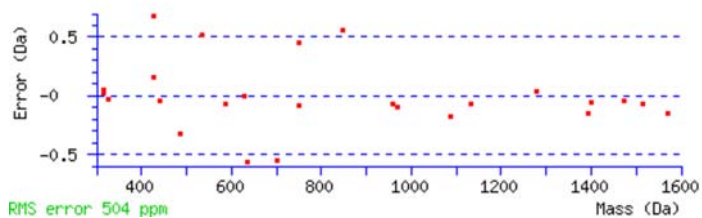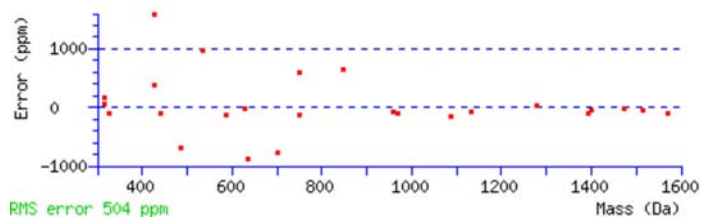

NCBI BLAST search of [ILVLFYPLEPSQIGK](#)

(Parameters: blastp, nr protein database, expect=20000, no filter, PAM30)

Other BLAST [web gateways](#)

**All matches to this query**

| Score | Mr(calc): | Delta   | Sequence                          |
|-------|-----------|---------|-----------------------------------|
| 55.0  | 1715.9862 | 0.3765  | <a href="#">ILVLFYPLEPSQIGK</a>   |
| 7.0   | 1716.8278 | -0.4651 | <a href="#">NLSPSSNASKPEQSSGK</a> |
| 3.5   | 1717.9106 | -1.5479 | <a href="#">QMGADVMLSLSLINVK</a>  |
| 2.5   | 1715.7560 | 0.6067  | <a href="#">TSSYSCESVGPETLEK</a>  |
| 2.3   | 1716.6728 | -0.3101 | <a href="#">CGNGACIMQDFVCDGK</a>  |
| 2.2   | 1717.9587 | -1.5960 | <a href="#">AQIDAHNINVGIRAVK</a>  |
| 1.8   | 1716.8683 | -0.5055 | <a href="#">HVTKIQFSEISEDGK</a>   |
| 1.7   | 1715.9651 | 0.3976  | <a href="#">FIFTGVFVGGVYLLGK</a>  |
| 1.4   | 1716.7914 | -0.4287 | <a href="#">QAEEEDGSQGGVNKAAK</a> |
| 0.8   | 1717.0073 | -0.6446 | <a href="#">RLGVLAFLVLGTCSLR</a>  |

Mascot: <http://www.matrixscience.com/>

# **MATRIX SCIENCE** Mascot Search Results

## Peptide View

MS/MS Fragmentation of **INAAR**

Found in **gi|131889079|ref|NP\_001076537.1**, hypothetical protein LOC100034487 [Danio rerio]

Match to Query 4376: 543.262724 from(544.270000,1+) index(33707)

Data file TCDD\_0530.dta

Click mouse within plot area to zoom in by factor of two about that point

Or, Plot from  to  Da

Label all possible matches  Label matches used for scoring

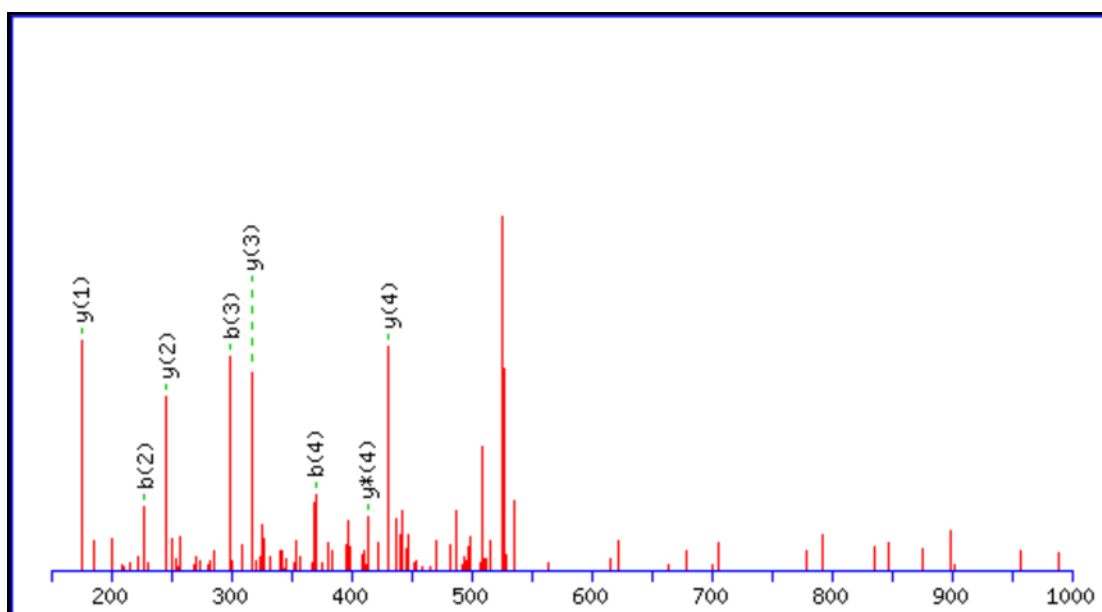

**Monoisotopic mass of neutral peptide Mr(calc):** 543.3129

**Ions Score:** 42 **Expect:** 0.034

**Matches :** 8/15 fragment ions using 12 most intense peaks ([help](#))

| # | b               | b*       | Seq. | y               | y*       | # |
|---|-----------------|----------|------|-----------------|----------|---|
| 1 | 114.0913        |          | I    |                 |          | 5 |
| 2 | <b>228.1343</b> | 211.1077 | N    | <b>431.2361</b> | 414.2096 | 4 |
| 3 | <b>299.1714</b> | 282.1448 | A    | <b>317.1932</b> | 300.1666 | 3 |
| 4 | <b>370.2085</b> | 353.1819 | A    | <b>246.1561</b> | 229.1295 | 2 |
| 5 |                 |          | R    | <b>175.1190</b> | 158.0924 | 1 |

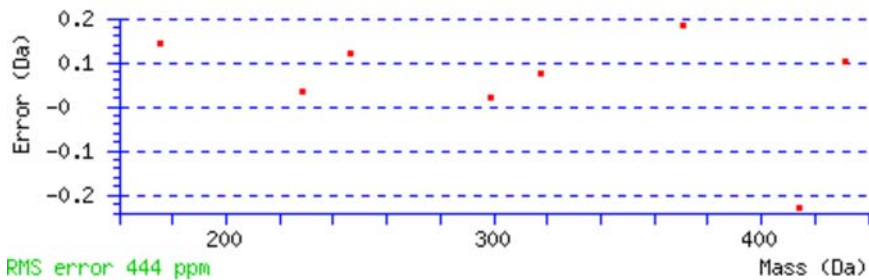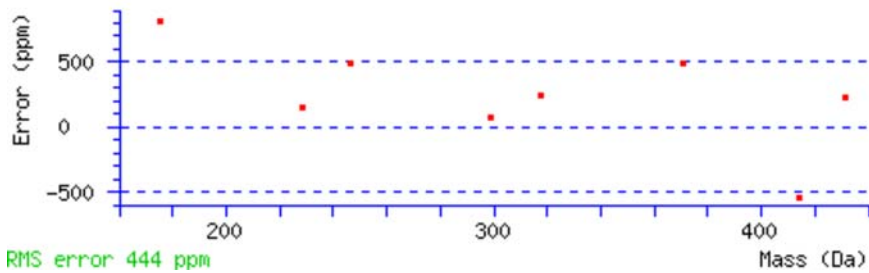

NCBI **BLAST** search of [INAAR](#)

(Parameters: blastp, nr protein database, expect=20000, no filter, PAM30)

Other BLAST [web gateways](#)

**All matches to this query**

| Score | Mr(calc): | Delta   | Sequence              |
|-------|-----------|---------|-----------------------|
| 41.9  | 543.3129  | -0.0501 | <a href="#">INAAR</a> |
| 41.9  | 543.3129  | -0.0501 | <a href="#">LNAAR</a> |
| 28.7  | 544.2717  | -1.0090 | <a href="#">NNAAR</a> |
| 25.7  | 543.3129  | -0.0501 | <a href="#">NLAAR</a> |
| 24.0  | 542.2812  | 0.9815  | <a href="#">EPAAR</a> |
| 23.3  | 543.3241  | -0.0614 | <a href="#">ARAAR</a> |
| 23.3  | 543.3493  | -0.0865 | <a href="#">KVAAR</a> |
| 23.3  | 543.3241  | -0.0614 | <a href="#">RAAAR</a> |
| 23.3  | 543.3493  | -0.0865 | <a href="#">VKAAR</a> |
| 23.3  | 543.3129  | -0.0502 | <a href="#">VQAAR</a> |

**Mascot:** <http://www.matrixscience.com/>

# MASCOT SCIENCE Mascot Search Results

## Peptide View

MS/MS Fragmentation of **INVDEIGPQTLAR**

Found in [gi|189517523|ref|XP\\_001918449.1](#), PREDICTED: hypothetical protein [Danio rerio]

Match to Query 21625: 1425.462724 from(713.738638,2+) index(19603)

Data file TCDD\_0531.dta

Click mouse within plot area to zoom in by factor of two about that point

Or, Plot from  to  Da

Label all possible matches  Label matches used for scoring

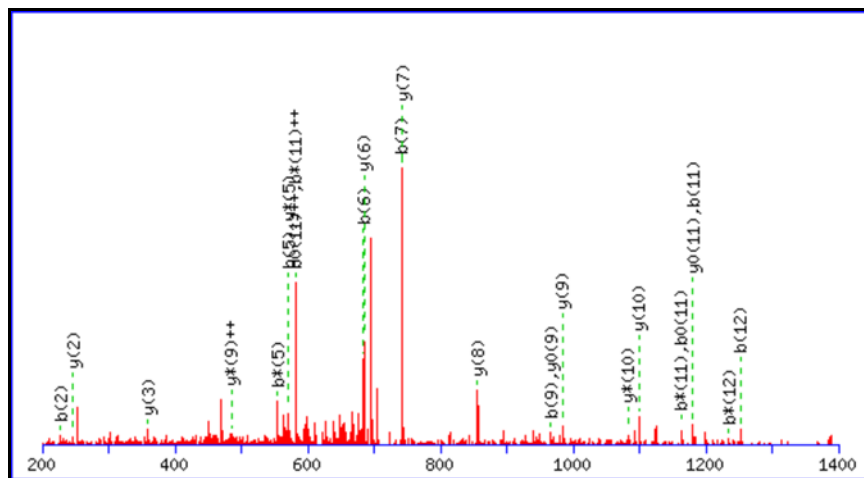

Monoisotopic mass of neutral peptide Mr(calc): 1424.7623

Ions Score: 44 Expect: 0.012

Matches : 25/130 fragment ions using 48 most intense peaks ([help](#))

| #  | b                | b <sup>++</sup> | b <sup>*</sup>   | b <sup>***</sup> | b <sup>0</sup>   | b <sup>0++</sup> | Seq. | y                | y <sup>++</sup> | y <sup>*</sup>   | y <sup>***</sup> | y <sup>0</sup>   | y <sup>0++</sup> | #  |
|----|------------------|-----------------|------------------|------------------|------------------|------------------|------|------------------|-----------------|------------------|------------------|------------------|------------------|----|
| 1  | 114.0913         | 57.5493         |                  |                  |                  |                  | I    |                  |                 |                  |                  |                  |                  | 13 |
| 2  | <b>228.1343</b>  | 114.5708        | 211.1077         | 106.0575         |                  |                  | N    | 1312.6856        | 656.8464        | 1295.6590        | 648.3331         | 1294.6750        | 647.8411         | 12 |
| 3  | 327.2027         | 164.1050        | 310.1761         | 155.5917         |                  |                  | V    | 1198.6426        | 599.8250        | 1181.6161        | 591.3117         | <b>1180.6321</b> | 590.8197         | 11 |
| 4  | 442.2296         | 221.6185        | 425.2031         | 213.1052         | 424.2191         | 212.6132         | D    | <b>1099.5742</b> | 550.2907        | <b>1082.5477</b> | 541.7775         | 1081.5637        | 541.2855         | 10 |
| 5  | <b>571.2722</b>  | 286.1397        | <b>554.2457</b>  | 277.6265         | 553.2617         | 277.1345         | E    | <b>984.5473</b>  | 492.7773        | 967.5207         | <b>484.2640</b>  | <b>966.5367</b>  | 483.7720         | 9  |
| 6  | <b>684.3563</b>  | 342.6818        | 667.3297         | 334.1685         | 666.3457         | 333.6765         | I    | <b>855.5047</b>  | 428.2560        | 838.4781         | 419.7427         | 837.4941         | 419.2507         | 8  |
| 7  | <b>741.3777</b>  | 371.1925        | 724.3512         | 362.6792         | 723.3672         | 362.1872         | G    | <b>742.4206</b>  | 371.7139        | 725.3941         | 363.2007         | 724.4100         | 362.7087         | 7  |
| 8  | 838.4305         | 419.7189        | 821.4040         | 411.2056         | 820.4199         | 410.7136         | P    | <b>685.3992</b>  | 343.2032        | 668.3726         | 334.6899         | 667.3886         | 334.1979         | 6  |
| 9  | <b>966.4891</b>  | 483.7482        | 949.4625         | 475.2349         | 948.4785         | 474.7429         | Q    | 588.3464         | 294.6768        | <b>571.3198</b>  | 286.1636         | 570.3358         | 285.6715         | 5  |
| 10 | 1067.5368        | 534.2720        | 1050.5102        | 525.7587         | 1049.5262        | 525.2667         | T    | 460.2878         | 230.6475        | 443.2613         | 222.1343         | 442.2772         | 221.6423         | 4  |
| 11 | <b>1180.6208</b> | 590.8141        | <b>1163.5943</b> | <b>582.3008</b>  | <b>1162.6103</b> | <b>581.8088</b>  | L    | <b>359.2401</b>  | 180.1237        | 342.2136         | 171.6104         |                  |                  | 3  |
| 12 | <b>1251.6579</b> | 626.3326        | <b>1234.6314</b> | 617.8193         | 1233.6474        | 617.3273         | A    | <b>246.1561</b>  | 123.5817        | 229.1295         | 115.0684         |                  |                  | 2  |
| 13 |                  |                 |                  |                  |                  |                  | R    | 175.1190         | 88.0631         | 158.0924         | 79.5498          |                  |                  | 1  |

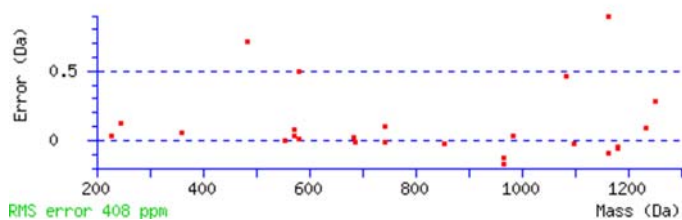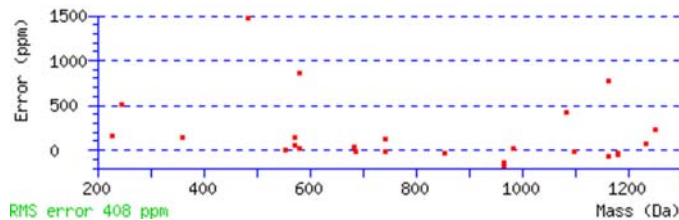

NCBI BLAST search of [INVDEIGPQTLAR](#)

(Parameters: blastp, nr protein database, expect=20000, no filter, PAM30)  
 Other BLAST [web gateways](#)

**All matches to this query**

| Score | Mr(calc): | Delta   | Sequence                       |
|-------|-----------|---------|--------------------------------|
| 44.0  | 1424.7623 | 0.7004  | <a href="#">INVDEIGPQTLAR</a>  |
| 16.4  | 1424.6428 | 0.8199  | <a href="#">GGEPAGICLACSYK</a> |
| 12.8  | 1424.8463 | 0.6164  | <a href="#">RALTIQEIAALAR</a>  |
| 11.6  | 1425.7504 | -0.2877 | <a href="#">GEVVSVTAYGAFVK</a> |
| 11.5  | 1426.7391 | -1.2764 | <a href="#">AQKTGSLCLFFR</a>   |
| 10.2  | 1424.7235 | 0.7392  | <a href="#">GGVVKLCDFGFAR</a>  |
| 10.0  | 1425.8456 | -0.3829 | <a href="#">LPLRFNDALVLR</a>   |
| 9.7   | 1424.6718 | 0.7909  | <a href="#">NALKSVECYDAR</a>   |
| 8.8   | 1425.7841 | -0.3213 | <a href="#">HSALDFAIRQLR</a>   |
| 7.8   | 1424.7736 | 0.6892  | <a href="#">THTERLVETLAR</a>   |

**Mascot:** <http://www.matrixscience.com/>

**MASCOT** SCIENCE **Mascot Search Results**

**Peptide View**

MS/MS Fragmentation of **ISGETIFVTAPHDATAGHGVNR**

Found in [gi|53292609|ref|NP\\_001005391.1](#), clathrin, heavy polypeptide a (Hc) [Danio rerio]

Match to Query 80378: 2339.482724 from(1170.748638,2+) index(19853)  
Data file TCDD\_0530.dta

Click mouse within plot area to zoom in by factor of two about that point

Or, Plot from  to  Da

Label all possible matches  Label matches used for scoring

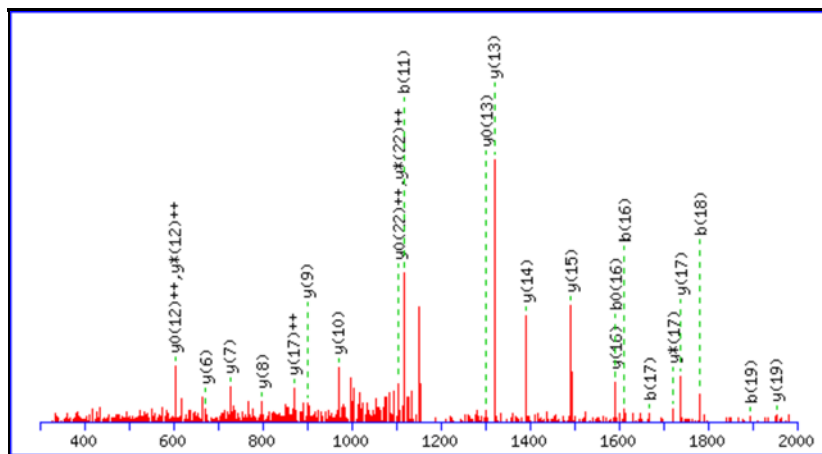

Monoisotopic mass of neutral peptide Mr(calc): 2338.2281

Ions Score: 48 Expect: 0.0027

Matches : 24/204 fragment ions using 51 most intense peaks ([help](#))

| #  | b                | b <sup>++</sup> | b*        | b <sup>*++</sup> | b <sup>0</sup>   | b <sup>0++</sup> | Seq. | y                | y <sup>++</sup> | y*               | y <sup>*++</sup> | y <sup>0</sup>   | y <sup>0++</sup> | #  |
|----|------------------|-----------------|-----------|------------------|------------------|------------------|------|------------------|-----------------|------------------|------------------|------------------|------------------|----|
| 1  | 114.0913         | 57.5493         |           |                  |                  |                  | I    |                  |                 |                  |                  |                  |                  | 23 |
| 2  | 201.1234         | 101.0653        |           |                  | 183.1128         | 92.0600          | S    | 2226.1513        | 1113.5793       | 2209.1248        | 1105.0660        | 2208.1408        | 1104.5740        | 22 |
| 3  | 258.1448         | 129.5761        |           |                  | 240.1343         | 120.5708         | G    | 2139.1193        | 1070.0633       | 2122.0927        | 1061.5500        | 2121.1087        | 1061.0580        | 21 |
| 4  | 387.1874         | 194.0974        |           |                  | 369.1769         | 185.0921         | E    | 2082.0978        | 1041.5526       | 2065.0713        | 1033.0393        | 2064.0873        | 1032.5473        | 20 |
| 5  | 488.2351         | 244.6212        |           |                  | 470.2245         | 235.6159         | T    | <b>1953.0552</b> | 977.0313        | 1936.0287        | 968.5180         | 1935.0447        | 968.0260         | 19 |
| 6  | 601.3192         | 301.1632        |           |                  | 583.3086         | 292.1579         | I    | 1852.0076        | 926.5074        | 1834.9810        | 917.9941         | 1833.9970        | 917.5021         | 18 |
| 7  | 748.3876         | 374.6974        |           |                  | 730.3770         | 365.6921         | F    | <b>1738.9235</b> | <b>869.9654</b> | <b>1721.8969</b> | 861.4521         | 1720.9129        | 860.9601         | 17 |
| 8  | 847.4560         | 424.2316        |           |                  | 829.4454         | 415.2264         | V    | <b>1591.8551</b> | 796.4312        | 1574.8285        | 787.9179         | 1573.8445        | 787.4259         | 16 |
| 9  | 948.5037         | 474.7555        |           |                  | 930.4931         | 465.7502         | T    | <b>1492.7867</b> | 746.8970        | 1475.7601        | 738.3837         | 1474.7761        | 737.8917         | 15 |
| 10 | 1019.5408        | 510.2740        |           |                  | 1001.5302        | 501.2687         | A    | <b>1391.7390</b> | 696.3731        | 1374.7124        | 687.8599         | 1373.7284        | 687.3678         | 14 |
| 11 | <b>1116.5936</b> | 558.8004        |           |                  | 1098.5830        | 549.7951         | P    | <b>1320.7019</b> | 660.8546        | 1303.6753        | 652.3413         | <b>1302.6913</b> | 651.8493         | 13 |
| 12 | 1253.6525        | 627.3299        |           |                  | 1235.6419        | 618.3246         | H    | 1223.6491        | 612.3282        | 1206.6226        | <b>603.8149</b>  | 1205.6385        | <b>603.3229</b>  | 12 |
| 13 | 1368.6794        | 684.8433        |           |                  | 1350.6688        | 675.8381         | D    | 1086.5902        | 543.7987        | 1069.5636        | 535.2855         | 1068.5796        | 534.7935         | 11 |
| 14 | 1439.7165        | 720.3619        |           |                  | 1421.7060        | 711.3566         | A    | <b>971.5633</b>  | 486.2853        | 954.5367         | 477.7720         | 953.5527         | 477.2800         | 10 |
| 15 | 1540.7642        | 770.8857        |           |                  | 1522.7536        | 761.8805         | T    | <b>900.5261</b>  | 450.7667        | 883.4996         | 442.2534         | 882.5156         | 441.7614         | 9  |
| 16 | <b>1611.8013</b> | 806.4043        |           |                  | <b>1593.7907</b> | 797.3990         | A    | <b>799.4785</b>  | 400.2429        | 782.4519         | 391.7296         |                  |                  | 8  |
| 17 | <b>1668.8228</b> | 834.9150        |           |                  | 1650.8122        | 825.9097         | G    | <b>728.4413</b>  | 364.7243        | 711.4148         | 356.2110         |                  |                  | 7  |
| 18 | <b>1781.9068</b> | 891.4571        |           |                  | 1763.8963        | 882.4518         | I    | <b>671.4199</b>  | 336.2136        | 654.3933         | 327.7003         |                  |                  | 6  |
| 19 | <b>1894.9909</b> | 947.9991        |           |                  | 1876.9803        | 938.9938         | I    | 558.3358         | 279.6715        | 541.3093         | 271.1583         |                  |                  | 5  |
| 20 | 1952.0124        | 976.5098        |           |                  | 1934.0018        | 967.5045         | G    | 445.2518         | 223.1295        | 428.2252         | 214.6162         |                  |                  | 4  |
| 21 | 2051.0808        | 1026.0440       |           |                  | 2033.0702        | 1017.0387        | V    | 388.2303         | 194.6188        | 371.2037         | 186.1055         |                  |                  | 3  |
| 22 | 2165.1237        | 1083.0655       | 2148.0972 | 1074.5522        | 2147.1131        | 1074.0602        | N    | 289.1619         | 145.0846        | 272.1353         | 136.5713         |                  |                  | 2  |
| 23 |                  |                 |           |                  |                  |                  | R    | 175.1190         | 88.0631         | 158.0924         | 79.5498          |                  |                  | 1  |

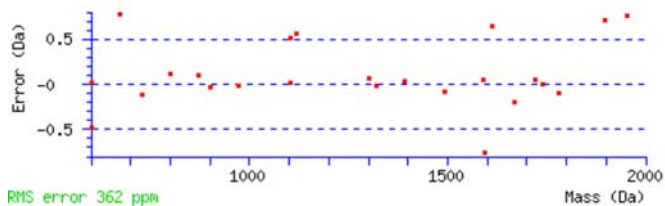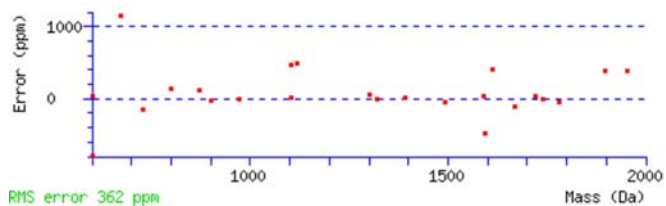

NCBI BLAST search of [ISGETIFVTAPHDATAGIIGVNR](#)

(Parameters: blastp, nr protein database, expect=20000, no filter, PAM30)

Other BLAST [web gateways](#)

**All matches to this query**

| Score | Mr(calc): | Delta   | Sequence                                 |
|-------|-----------|---------|------------------------------------------|
| 48.3  | 2338.2281 | 1.2546  | <a href="#">ISGETIFVTAPHDATAGIIGVNR</a>  |
| 4.0   | 2338.0396 | 1.4431  | <a href="#">GASSAFPENSAKGAHNFSACSNKG</a> |
| 2.7   | 2341.1775 | -1.6947 | <a href="#">LDRLHNTTFQPSNISDSIQR</a>     |
| 1.8   | 2338.0673 | 1.4154  | <a href="#">EVNSQDEEFELGKSLNGSSNR</a>    |
| 0.8   | 2339.0894 | 0.3933  | <a href="#">DTLGCSLLQKNMPCFLSPR</a>      |
| 0.8   | 2339.0894 | 0.3933  | <a href="#">DTLGCSLLQKNMPCFLSPR</a>      |
| 0.8   | 2341.0070 | -1.5242 | <a href="#">AQGFPAASCWEWTTQTERES</a>     |

Mascot: <http://www.matrixscience.com/>

**MATRIX SCIENCE** Mascot Search Results

**Peptide View**

MS/MS Fragmentation of **ITDENLQSQTTGLYIPEYEEALKK**

Found in [gi|52219050|ref|NP\\_001004598.1](#), hypothetical protein LOC447859 [Danio rerio]

Match to Query 103017: 2783.722725 from(928.914851,3+) index(19748)

Data file TCDD\_0530.dta

Click mouse within plot area to zoom in by factor of two about that point

Or, Plot from  to  Da

Label all possible matches  Label matches used for scoring

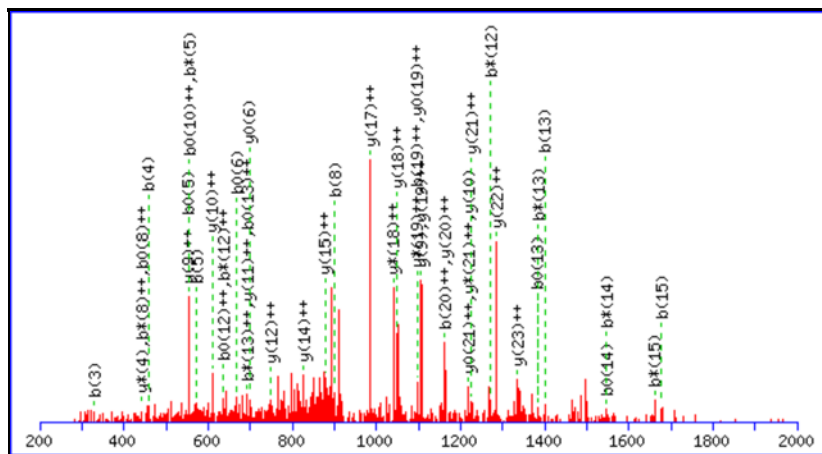

Monoisotopic mass of neutral peptide Mr(calc): 2782.3912

Ions Score: 45 Expect: 0.0048

Matches : 46/258 fragment ions using 80 most intense peaks ([help](#))

| #  | b         | b <sup>++</sup> | b*        | b <sup>*++</sup> | b <sup>0</sup> | b <sup>0++</sup> | Seq. | y         | y <sup>++</sup> | y*        | y <sup>*++</sup> | y <sup>0</sup> | y <sup>0++</sup> | #  |
|----|-----------|-----------------|-----------|------------------|----------------|------------------|------|-----------|-----------------|-----------|------------------|----------------|------------------|----|
| 1  | 114.0913  | 57.5493         |           |                  |                |                  | I    |           |                 |           |                  |                |                  | 24 |
| 2  | 215.1390  | 108.0731        |           |                  | 197.1285       | 99.0679          | T    | 2670.3145 | 1335.6609       | 2653.2879 | 1327.1476        | 2652.3039      | 1326.6556        | 23 |
| 3  | 330.1660  | 165.5866        |           |                  | 312.1554       | 156.5813         | D    | 2569.2668 | 1285.1370       | 2552.2403 | 1276.6238        | 2551.2562      | 1276.1318        | 22 |
| 4  | 459.2086  | 230.1079        |           |                  | 441.1980       | 221.1026         | E    | 2454.2399 | 1227.6236       | 2437.2133 | 1219.1103        | 2436.2293      | 1218.6183        | 21 |
| 5  | 573.2515  | 287.1294        | 556.2249  | 278.6161         | 555.2409       | 278.1241         | N    | 2325.1973 | 1163.1023       | 2308.1707 | 1154.5890        | 2307.1867      | 1154.0970        | 20 |
| 6  | 686.3355  | 343.6714        | 669.3090  | 335.1581         | 668.3250       | 334.6661         | L    | 2211.1543 | 1106.0808       | 2194.1278 | 1097.5675        | 2193.1438      | 1097.0755        | 19 |
| 7  | 814.3941  | 407.7007        | 797.3676  | 399.1874         | 796.3836       | 398.6954         | Q    | 2098.0703 | 1049.5388       | 2081.0437 | 1041.0255        | 2080.0597      | 1040.5335        | 18 |
| 8  | 901.4262  | 451.2167        | 884.3996  | 442.7034         | 883.4156       | 442.2114         | S    | 1970.0117 | 985.5095        | 1952.9852 | 976.9962         | 1952.0011      | 976.5042         | 17 |
| 9  | 1029.4847 | 515.2460        | 1012.4582 | 506.7327         | 1011.4742      | 506.2407         | Q    | 1882.9797 | 941.9935        | 1865.9531 | 933.4802         | 1864.9691      | 932.9882         | 16 |
| 10 | 1130.5324 | 565.7698        | 1113.5059 | 557.2566         | 1112.5218      | 556.7646         | T    | 1754.9211 | 877.9642        | 1737.8945 | 869.4509         | 1736.9105      | 868.9589         | 15 |
| 11 | 1231.5801 | 616.2937        | 1214.5535 | 607.7804         | 1213.5695      | 607.2884         | T    | 1653.8734 | 827.4403        | 1636.8469 | 818.9271         | 1635.8629      | 818.4351         | 14 |
| 12 | 1288.6016 | 644.8044        | 1271.5750 | 636.2911         | 1270.5910      | 635.7991         | G    | 1552.8257 | 776.9165        | 1535.7992 | 768.4032         | 1534.8152      | 767.9112         | 13 |
| 13 | 1401.6856 | 701.3464        | 1384.6591 | 692.8332         | 1383.6751      | 692.3412         | L    | 1495.8043 | 748.4058        | 1478.7777 | 739.8925         | 1477.7937      | 739.4005         | 12 |
| 14 | 1564.7489 | 782.8781        | 1547.7224 | 774.3648         | 1546.7384      | 773.8728         | Y    | 1382.7202 | 691.8637        | 1365.6937 | 683.3505         | 1364.7096      | 682.8585         | 11 |
| 15 | 1677.8330 | 839.4201        | 1660.8065 | 830.9069         | 1659.8224      | 830.4149         | I    | 1219.6569 | 610.3321        | 1202.6303 | 601.8188         | 1201.6463      | 601.3268         | 10 |
| 16 | 1774.8858 | 887.9465        | 1757.8592 | 879.4332         | 1756.8752      | 878.9412         | P    | 1106.5728 | 553.7900        | 1089.5463 | 545.2768         | 1088.5623      | 544.7848         | 9  |
| 17 | 1903.9284 | 952.4678        | 1886.9018 | 943.9545         | 1885.9178      | 943.4625         | E    | 1009.5201 | 505.2637        | 992.4935  | 496.7504         | 991.5095       | 496.2584         | 8  |
| 18 | 2066.9917 | 1033.9955       | 2049.9651 | 1025.4862        | 2048.9811      | 1024.9942        | Y    | 880.4775  | 440.7424        | 863.4509  | 432.2291         | 862.4669       | 431.7371         | 7  |
| 19 | 2196.0343 | 1098.5208       | 2179.0077 | 1090.0075        | 2178.0237      | 1089.5155        | E    | 717.4141  | 359.2107        | 700.3876  | 350.6974         | 699.4036       | 350.2054         | 6  |
| 20 | 2325.0769 | 1163.0421       | 2308.0503 | 1154.5288        | 2307.0663      | 1154.0368        | E    | 588.3715  | 294.6894        | 571.3450  | 286.1761         | 570.3610       | 285.6841         | 5  |
| 21 | 2396.1140 | 1198.5606       | 2379.0874 | 1190.0474        | 2378.1034      | 1189.5554        | A    | 459.3289  | 230.1681        | 442.3024  | 221.6548         |                |                  | 4  |
| 22 | 2509.1981 | 1255.1027       | 2492.1715 | 1246.5894        | 2491.1875      | 1246.0974        | L    | 388.2918  | 194.6496        | 371.2653  | 186.1363         |                |                  | 3  |
| 23 | 2637.2930 | 1319.1501       | 2620.2665 | 1310.6369        | 2619.2825      | 1310.1449        | K    | 275.2078  | 138.1075        | 258.1812  | 129.5942         |                |                  | 2  |
| 24 |           |                 |           |                  |                |                  | K    | 147.1128  | 74.0600         | 130.0863  | 65.5468          |                |                  | 1  |



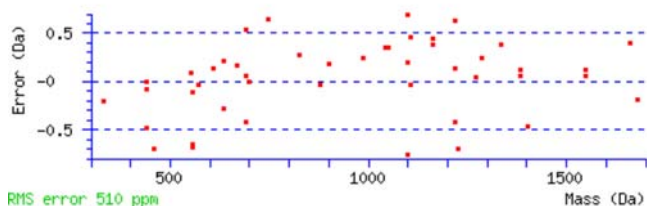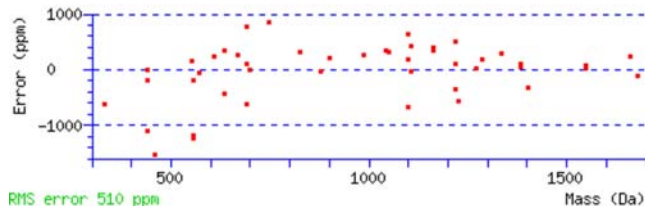

NCBI BLAST search of [ITDENLQSQTTGLYIPEYEEALKK](#)

(Parameters: blastp, nr protein database, expect=20000, no filter, PAM30)

Other BLAST [web gateways](#)

**All matches to this query**

| Score | Mr(calc): | Delta   | Sequence                                  |
|-------|-----------|---------|-------------------------------------------|
| 44.8  | 2782.3912 | 1.3315  | <a href="#">ITDENLQSQTTGLYIPEYEEALKK</a>  |
| 5.5   | 2783.3932 | 0.3295  | <a href="#">FSLSHRNTWISFGGSYAGALSAWLR</a> |
| 5.4   | 2784.3211 | -0.5984 | <a href="#">EINVFEMDGALCADLDVNRPNPAPK</a> |
| 5.2   | 2784.4844 | -0.7616 | <a href="#">MLIKAEQHLDLSALPTPESTPLQPR</a> |
| 4.1   | 2785.3026 | -1.5799 | <a href="#">ASDDGESVGNCPFCQRLFMLWLK</a>   |
| 4.0   | 2783.1681 | 0.5546  | <a href="#">IEGPPQAPGHPRPNTCCLCWCGCK</a>  |
| 3.0   | 2783.4440 | 0.2787  | <a href="#">TLDEILREIEEQAVIDEQTLAEVK</a>  |
| 2.8   | 2785.4181 | -1.6954 | <a href="#">EGHLEHLLARELVPGDTVCLSVGER</a> |
| 1.8   | 2784.4116 | -0.6888 | <a href="#">NEEGDSALVAAIKHDQYDMALLLR</a>  |
| 0.9   | 2782.4429 | 1.2798  | <a href="#">ITQLIDDVDPSTTFVLLNAVYFNGK</a> |

Mascot: <http://www.matrixscience.com/>

# MASCOT SCIENCE Mascot Search Results

## Peptide View

MS/MS Fragmentation of **KAIHFVPVPQLK**

Found in **gi|41152175|ref|NP\_957046.1**, ribosomal protein S7 [Danio rerio]

Match to Query 22048: 1464.932724 from(733.473638,2+) index(57904)

Data file TCDD\_0530.dta

Click mouse within plot area to zoom in by factor of two about that point

Or, Plot from  to  Da

Label all possible matches  Label matches used for scoring

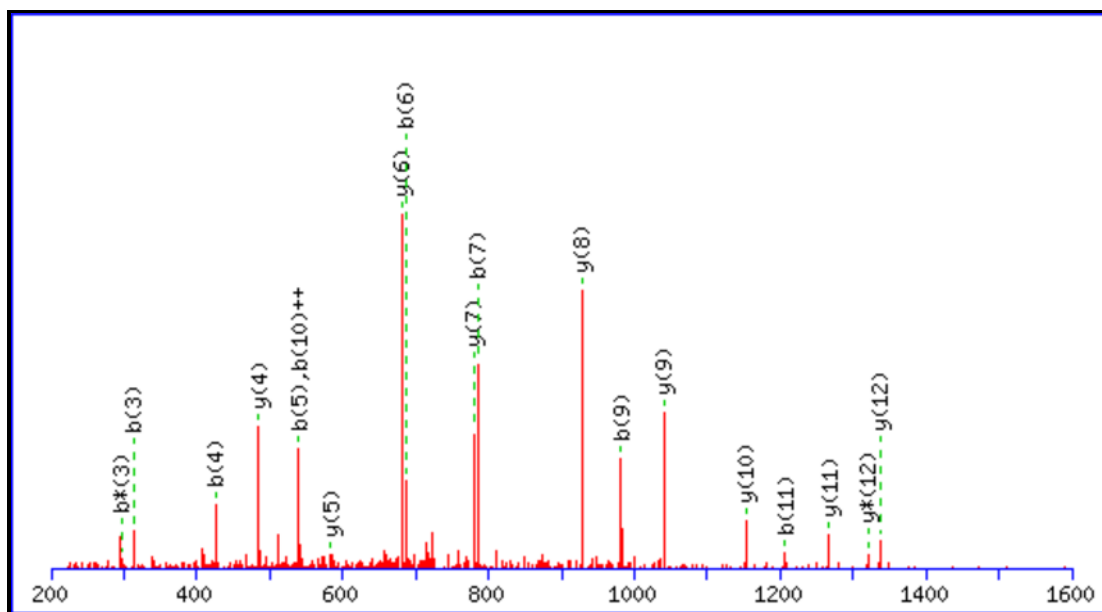

Monoisotopic mass of neutral peptide  $M_r(\text{calc})$ : 1464.9432

Ions Score: 52 Expect: 0.0018

Matches : 19/96 fragment ions using 37 most intense peaks ([help](#))

| #  | b               | b <sup>++</sup> | b*              | b <sup>*++</sup> | Seq.     | y                | y <sup>++</sup> | y*               | y <sup>*++</sup> | #         |
|----|-----------------|-----------------|-----------------|------------------|----------|------------------|-----------------|------------------|------------------|-----------|
| 1  | 129.1022        | 65.0548         | 112.0757        | 56.5415          | <b>K</b> |                  |                 |                  |                  | <b>13</b> |
| 2  | 200.1394        | 100.5733        | 183.1128        | 92.0600          | <b>A</b> | <b>1337.8555</b> | 669.4314        | <b>1320.8290</b> | 660.9181         | <b>12</b> |
| 3  | <b>313.2234</b> | 157.1153        | <b>296.1969</b> | 148.6021         | <b>I</b> | <b>1266.8184</b> | 633.9128        | 1249.7919        | 625.3996         | <b>11</b> |
| 4  | <b>426.3075</b> | 213.6574        | 409.2809        | 205.1441         | <b>I</b> | <b>1153.7343</b> | 577.3708        | 1136.7078        | 568.8575         | <b>10</b> |
| 5  | <b>539.3915</b> | 270.1994        | 522.3650        | 261.6861         | <b>I</b> | <b>1040.6503</b> | 520.8288        | 1023.6237        | 512.3155         | <b>9</b>  |
| 6  | <b>686.4600</b> | 343.7336        | 669.4334        | 335.2203         | <b>F</b> | <b>927.5662</b>  | 464.2867        | 910.5397         | 455.7735         | <b>8</b>  |
| 7  | <b>785.5284</b> | 393.2678        | 768.5018        | 384.7545         | <b>V</b> | <b>780.4978</b>  | 390.7525        | 763.4713         | 382.2393         | <b>7</b>  |
| 8  | 882.5811        | 441.7942        | 865.5546        | 433.2809         | <b>P</b> | <b>681.4294</b>  | 341.2183        | 664.4028         | 332.7051         | <b>6</b>  |
| 9  | <b>981.6496</b> | 491.3284        | 964.6230        | 482.8151         | <b>V</b> | <b>584.3766</b>  | 292.6919        | 567.3501         | 284.1787         | <b>5</b>  |
| 10 | 1078.7023       | <b>539.8548</b> | 1061.6758       | 531.3415         | <b>P</b> | <b>485.3082</b>  | 243.1577        | 468.2817         | 234.6445         | <b>4</b>  |

|    |                  |          |           |          |          |          |          |          |          |          |
|----|------------------|----------|-----------|----------|----------|----------|----------|----------|----------|----------|
| 11 | <b>1206.7609</b> | 603.8841 | 1189.7343 | 595.3708 | <b>Q</b> | 388.2554 | 194.6314 | 371.2289 | 186.1181 | <b>3</b> |
| 12 | 1319.8450        | 660.4261 | 1302.8184 | 651.9128 | <b>L</b> | 260.1969 | 130.6021 | 243.1703 | 122.0888 | <b>2</b> |
| 13 |                  |          |           |          | <b>K</b> | 147.1128 | 74.0600  | 130.0863 | 65.5468  | <b>1</b> |

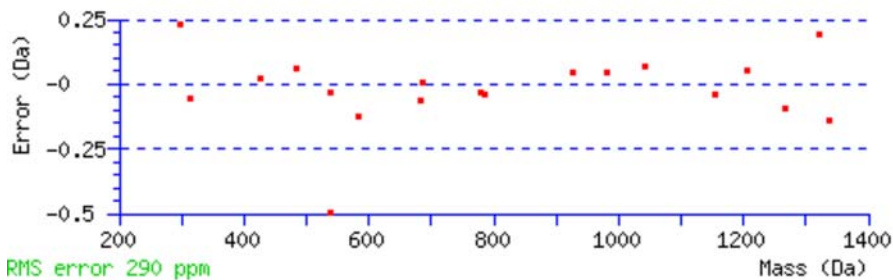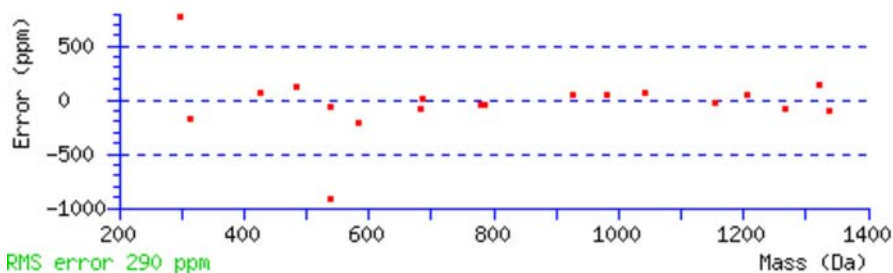

NCBI **BLAST** search of [KAIIFVVPQLK](#)

(Parameters: blastp, nr protein database, expect=20000, no filter, PAM30)

Other BLAST [web gateways](#)

**All matches to this query**

| Score | Mr(calc): | Delta   | Sequence                       |
|-------|-----------|---------|--------------------------------|
| 51.8  | 1464.9432 | -0.0105 | <a href="#">KAIIFVVPQLK</a>    |
| 16.6  | 1464.7395 | 0.1933  | <a href="#">QALLEMYNTLNR</a>   |
| 9.2   | 1465.7275 | -0.7948 | <a href="#">LQANFFEMEIPK</a>   |
| 5.8   | 1465.7273 | -0.7946 | <a href="#">GAADKEGGLQIHDR</a> |
| 5.0   | 1466.7188 | -1.7860 | <a href="#">EHCLEPQSLIGGK</a>  |
| 4.6   | 1464.8300 | 0.1027  | <a href="#">KAILAIDSSPTPPR</a> |
| 4.5   | 1462.7701 | 2.1626  | <a href="#">SSTTSMTSVPKPLK</a> |
| 4.0   | 1465.7785 | -0.8458 | <a href="#">KPLSLSAFTLCMR</a>  |
| 3.1   | 1462.6585 | 2.2743  | <a href="#">CGVKPPEPGECYK</a>  |
| 3.0   | 1466.6976 | -1.7649 | <a href="#">EAERATFWCLNK</a>   |

**Mascot:** <http://www.matrixscience.com/>

**MASCOT** SCIENCE **Mascot Search Results**

**Peptide View**

MS/MS Fragmentation of **KGGIVADNVLWGGR**

Found in [gi|68389723|ref|XP\\_696495.1](#), PREDICTED: catechol-O-methyltransferase domain containing 1 [Danio rerio]

Match to Query 24721: 1554.792724 from(778.403638,2+) index(46302)

Data file TCDD\_0530.dta

Click mouse within plot area to zoom in by factor of two about that point

Or, Plot from  to  Da

Label all possible matches  Label matches used for scoring

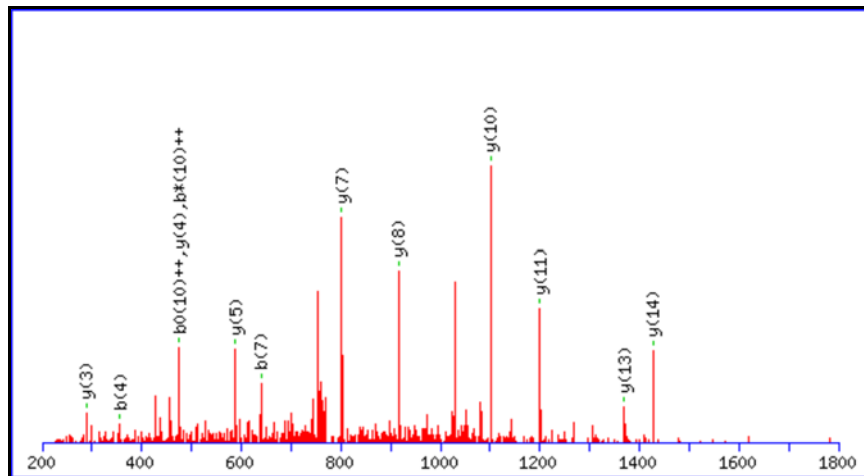

Monoisotopic mass of neutral peptide Mr(calc): 1553.8678

Ions Score: 77 Expect: 5.5e-006

Matches : 13/140 fragment ions using 14 most intense peaks ([help](#))

| #  | b         | b <sup>++</sup> | b*        | b <sup>*++</sup> | b <sup>0</sup> | b <sup>0++</sup> | Seq. | y         | y <sup>++</sup> | y*        | y <sup>*++</sup> | y <sup>0</sup> | y <sup>0++</sup> | #  |
|----|-----------|-----------------|-----------|------------------|----------------|------------------|------|-----------|-----------------|-----------|------------------|----------------|------------------|----|
| 1  | 129.1022  | 65.0548         | 112.0757  | 56.5415          |                |                  | K    |           |                 |           |                  |                |                  | 15 |
| 2  | 186.1237  | 93.5655         | 169.0972  | 85.0522          |                |                  | G    | 1426.7801 | 713.8937        | 1409.7536 | 705.3804         | 1408.7696      | 704.8884         | 14 |
| 3  | 243.1452  | 122.0762        | 226.1186  | 113.5629         |                |                  | G    | 1369.7587 | 685.3830        | 1352.7321 | 676.8697         | 1351.7481      | 676.3777         | 13 |
| 4  | 356.2292  | 178.6183        | 339.2027  | 170.1050         |                |                  | I    | 1312.7372 | 656.8722        | 1295.7106 | 648.3590         | 1294.7266      | 647.8670         | 12 |
| 5  | 455.2976  | 228.1525        | 438.2711  | 219.6392         |                |                  | V    | 1199.6531 | 600.3302        | 1182.6266 | 591.8169         | 1181.6426      | 591.3249         | 11 |
| 6  | 526.3348  | 263.6710        | 509.3082  | 255.1577         |                |                  | A    | 1100.5847 | 550.7960        | 1083.5582 | 542.2827         | 1082.5742      | 541.7907         | 10 |
| 7  | 639.4188  | 320.2130        | 622.3923  | 311.6998         |                |                  | I    | 1029.5476 | 515.2774        | 1012.5211 | 506.7642         | 1011.5370      | 506.2722         | 9  |
| 8  | 754.4458  | 377.7265        | 737.4192  | 369.2132         | 736.4352       | 368.7212         | D    | 916.4635  | 458.7354        | 899.4370  | 450.2221         | 898.4530       | 449.7301         | 8  |
| 9  | 868.4887  | 434.7480        | 851.4621  | 426.2347         | 850.4781       | 425.7427         | N    | 801.4366  | 401.2219        | 784.4100  | 392.7087         |                |                  | 7  |
| 10 | 967.5571  | 484.2822        | 950.5306  | 475.7689         | 949.5465       | 475.2769         | V    | 687.3937  | 344.2005        | 670.3671  | 335.6872         |                |                  | 6  |
| 11 | 1080.6412 | 540.8242        | 1063.6146 | 532.3109         | 1062.6306      | 531.8189         | L    | 588.3253  | 294.6663        | 571.2987  | 286.1530         |                |                  | 5  |
| 12 | 1266.7205 | 633.8639        | 1249.6939 | 625.3506         | 1248.7099      | 624.8586         | W    | 475.2412  | 238.1242        | 458.2146  | 229.6110         |                |                  | 4  |
| 13 | 1323.7419 | 662.3746        | 1306.7154 | 653.8613         | 1305.7314      | 653.3693         | G    | 289.1619  | 145.0846        | 272.1353  | 136.5713         |                |                  | 3  |
| 14 | 1380.7634 | 690.8853        | 1363.7369 | 682.3721         | 1362.7528      | 681.8801         | G    | 232.1404  | 116.5738        | 215.1139  | 108.0606         |                |                  | 2  |
| 15 |           |                 |           |                  |                |                  | R    | 175.1190  | 88.0631         | 158.0924  | 79.5498          |                |                  | 1  |

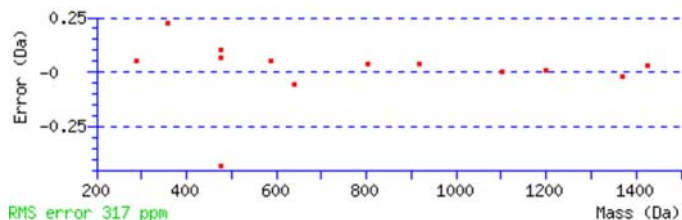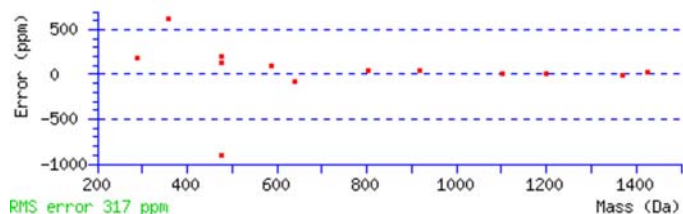

NCBI BLAST search of [KGGIVADNVLWGGR](#)  
 (Parameters: blastp, nr protein database, expect=20000, no filter, PAM30)  
 Other BLAST [web gateways](#)

**All matches to this query**

| Score | Mr(calc): | Delta   | Sequence                         |
|-------|-----------|---------|----------------------------------|
| 77.0  | 1553.8678 | 0.9249  | <a href="#">KGGIVADNVLWGGR</a>   |
| 7.8   | 1554.7824 | 0.0103  | <a href="#">SVPATPTTRGPSCPGK</a> |
| 5.8   | 1554.8704 | -0.0777 | <a href="#">HLSVVCYVKAALPR</a>   |
| 4.2   | 1554.7752 | 0.0175  | <a href="#">IGAGGLDGYIIEFCK</a>  |
| 3.8   | 1554.7750 | 0.0177  | <a href="#">NADGAPLDTPTTARR</a>  |
| 2.4   | 1554.7687 | 0.0241  | <a href="#">CYSTALFLKNHMK</a>    |
| 1.6   | 1554.8195 | -0.0267 | <a href="#">AGVWFRSLLTDYK</a>    |
| 0.6   | 1555.7590 | -0.9663 | <a href="#">ELNNAQDLIAADNR</a>   |
| 0.6   | 1554.8770 | -0.0842 | <a href="#">QLINNIQEFVIPK</a>    |

Mascot: <http://www.matrixscience.com/>

# Mascot Search Results

## Peptide View

MS/MS Fragmentation of **KGSLIDSSTIDPAVSK**

Found in [gi41055658|refNP\\_957454.1](#), 3-hydroxyisobutyrate dehydrogenase b [Danio rerio]

Match to Query 33174: 1729.952724 from(865.983638,2+) index(33999)

Data file TCDD\_0531.dta

Click mouse within plot area to zoom in by factor of two about that point

Or, Plot from  to  Da

Label all possible matches  Label matches used for scoring

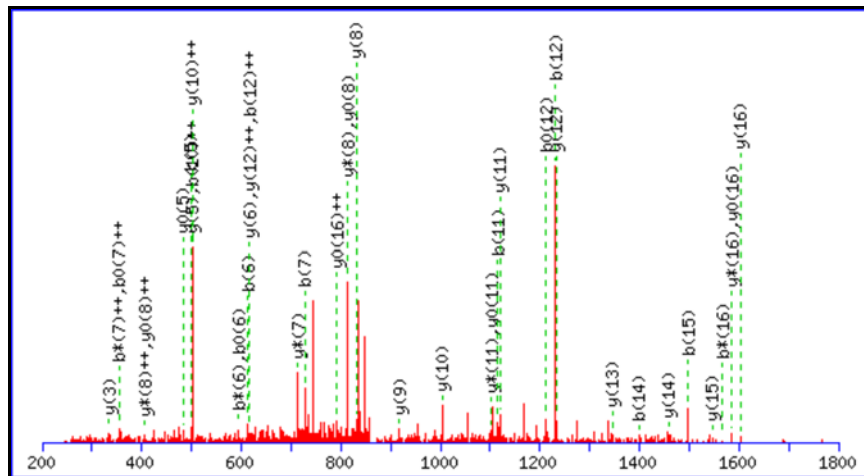

Monoisotopic mass of neutral peptide  $M_r(\text{calc})$ : 1729.9462

Ions Score: 46 Expect: 0.0056

Matches : 42/186 fragment ions using 100 most intense peaks ([help](#))

| #  | b         | b <sup>++</sup> | b <sup>*</sup> | b <sup>*++</sup> | b <sup>0</sup> | b <sup>0++</sup> | Seq. | y         | y <sup>++</sup> | y <sup>*</sup> | y <sup>*++</sup> | y <sup>0</sup> | y <sup>0++</sup> | #  |
|----|-----------|-----------------|----------------|------------------|----------------|------------------|------|-----------|-----------------|----------------|------------------|----------------|------------------|----|
| 1  | 129.1022  | 65.0548         | 112.0757       | 56.5415          |                |                  | K    |           |                 |                |                  |                |                  | 17 |
| 2  | 186.1237  | 93.5655         | 169.0972       | 85.0522          |                |                  | G    | 1602.8585 | 801.9329        | 1585.8319      | 793.4196         | 1584.8479      | 792.9276         | 16 |
| 3  | 273.1557  | 137.0815        | 256.1292       | 128.5682         | 255.1452       | 128.0762         | S    | 1545.8370 | 773.4222        | 1528.8105      | 764.9089         | 1527.8265      | 764.4169         | 15 |
| 4  | 386.2398  | 193.6235        | 369.2132       | 185.1103         | 368.2292       | 184.6183         | L    | 1458.8050 | 729.9061        | 1441.7785      | 721.3929         | 1440.7944      | 720.9009         | 14 |
| 5  | 499.3239  | 250.1656        | 482.2973       | 241.6523         | 481.3133       | 241.1603         | L    | 1345.7209 | 673.3641        | 1328.6944      | 664.8508         | 1327.7104      | 664.3588         | 13 |
| 6  | 612.4079  | 306.7076        | 595.3814       | 298.1943         | 594.3974       | 297.7023         | I    | 1232.6369 | 616.8221        | 1215.6103      | 608.3088         | 1214.6263      | 607.8168         | 12 |
| 7  | 727.4349  | 364.2211        | 710.4083       | 355.7078         | 709.4243       | 355.2158         | D    | 1119.5528 | 560.2800        | 1102.5263      | 551.7668         | 1101.5422      | 551.2748         | 11 |
| 8  | 814.4669  | 407.7371        | 797.4403       | 399.2238         | 796.4563       | 398.7318         | S    | 1004.5259 | 502.7666        | 987.4993       | 494.2533         | 986.5153       | 493.7613         | 10 |
| 9  | 901.4989  | 451.2531        | 884.4724       | 442.7398         | 883.4884       | 442.2478         | S    | 917.4938  | 459.2506        | 900.4673       | 450.7373         | 899.4833       | 450.2453         | 9  |
| 10 | 1002.5466 | 501.7769        | 985.5201       | 493.2637         | 984.5360       | 492.7717         | T    | 830.4618  | 415.7345        | 813.4353       | 407.2213         | 812.4512       | 406.7293         | 8  |
| 11 | 1115.6307 | 558.3190        | 1098.6041      | 549.8057         | 1097.6201      | 549.3137         | I    | 729.4141  | 365.2107        | 712.3876       | 356.6974         | 711.4036       | 356.2054         | 7  |
| 12 | 1230.6576 | 615.8324        | 1213.6311      | 607.3192         | 1212.6470      | 606.8272         | D    | 616.3301  | 308.6687        | 599.3035       | 300.1554         | 598.3195       | 299.6634         | 6  |
| 13 | 1327.7104 | 664.3588        | 1310.6838      | 655.8455         | 1309.6998      | 655.3535         | P    | 501.3031  | 251.1552        | 484.2766       | 242.6419         | 483.2926       | 242.1499         | 5  |
| 14 | 1398.7475 | 699.8774        | 1381.7209      | 691.3641         | 1380.7369      | 690.8721         | A    | 404.2504  | 202.6288        | 387.2238       | 194.1155         | 386.2398       | 193.6235         | 4  |
| 15 | 1497.8159 | 749.4116        | 1480.7894      | 740.8983         | 1479.8053      | 740.4063         | V    | 333.2132  | 167.1103        | 316.1867       | 158.5970         | 315.2027       | 158.1050         | 3  |
| 16 | 1584.8479 | 792.9276        | 1567.8214      | 784.4143         | 1566.8374      | 783.9223         | S    | 234.1448  | 117.5761        | 217.1183       | 109.0628         | 216.1343       | 108.5708         | 2  |
| 17 |           |                 |                |                  |                |                  | K    | 147.1128  | 74.0600         | 130.0863       | 65.5468          |                |                  | 1  |

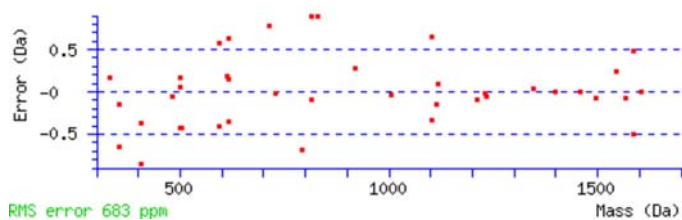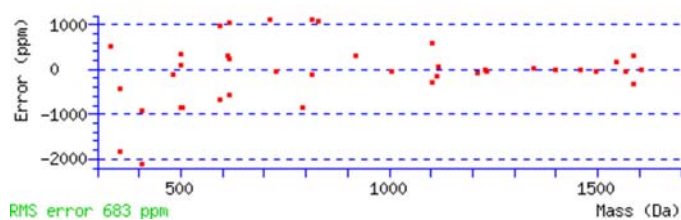

NCBI BLAST search of [KGSLIDSSTIDPAVSK](#)  
 (Parameters: blastp, nr protein database, expect=20000, no filter, PAM30)  
 Other BLAST [web gateways](#)

**All matches to this query**

| Score | Mr(calc): | Delta   | Sequence                          |
|-------|-----------|---------|-----------------------------------|
| 46.5  | 1729.9462 | 0.0066  | <a href="#">KGSLIDSSTIDPAVSK</a>  |
| 13.0  | 1730.9930 | -1.0403 | <a href="#">KPEKPPVVEEPKGGLK</a>  |
| 9.1   | 1730.8549 | -0.9022 | <a href="#">VTGKDLATAFDLSCYK</a>  |
| 8.6   | 1731.8792 | -1.9264 | <a href="#">EGFQSVDSREPLQIK</a>   |
| 8.1   | 1729.9098 | 0.0430  | <a href="#">QEEIQVLNETLSLSK</a>   |
| 7.7   | 1730.9144 | -0.9617 | <a href="#">LYQHAVEYFLHAIK</a>    |
| 6.2   | 1730.7959 | -0.8431 | <a href="#">SALETGAVEEASHTDSK</a> |
| 5.6   | 1730.7505 | -0.7978 | <a href="#">IMYCTDPGHVDHSTR</a>   |
| 5.5   | 1730.8953 | -0.9426 | <a href="#">LFELLEMEILYYR</a>     |
| 5.2   | 1728.9621 | 0.9906  | <a href="#">EGLAKITVNISDITQK</a>  |

Mascot: <http://www.matrixscience.com/>

**MATRIX SCIENCE** Mascot Search Results

**Peptide View**

MS/MS Fragmentation of **KIGVELIAASTDSHFSLAWINTPR**  
 Found in [gi|50539996|ref|NP\\_001002468.1](#), peroxiredoxin 2 [Danio rerio]

Match to Query 102374: 2764.512723 from(922.511517,3+) index(90201)  
 Data file TCDD\_0530.dta

Click mouse within plot area to zoom in by factor of two about that point

Or, Plot from  to  Da

Label all possible matches  Label matches used for scoring

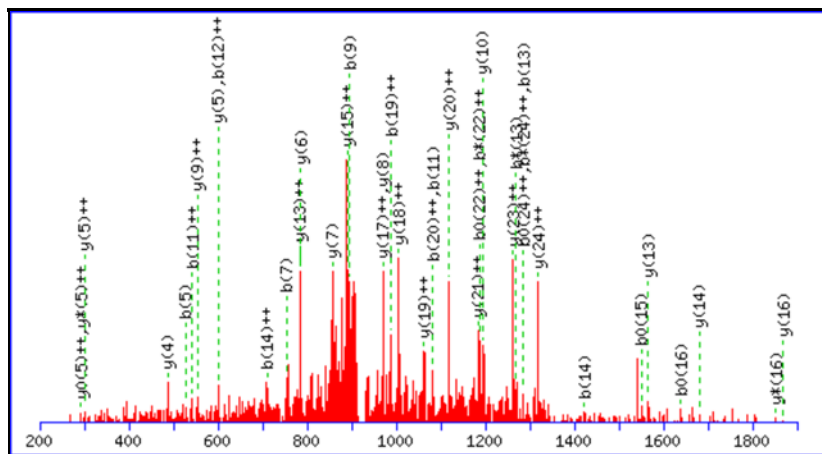

Monoisotopic mass of neutral peptide Mr(calc): 2762.4504  
 Ions Score: 44 Expect: 0.0062  
 Matches : 41/276 fragment ions using 96 most intense peaks ([help](#))

| #  | b                | b <sup>++</sup>  | b*               | b <sup>*++</sup> | b <sup>0</sup>   | b <sup>0++</sup> | Seq.     | y                | y <sup>++</sup>  | y*               | y <sup>*++</sup> | y <sup>0</sup> | y <sup>0++</sup> | #         |
|----|------------------|------------------|------------------|------------------|------------------|------------------|----------|------------------|------------------|------------------|------------------|----------------|------------------|-----------|
| 1  | 129.1022         | 65.0548          | 112.0757         | 56.5415          |                  |                  | <b>K</b> |                  |                  |                  |                  |                |                  | <b>25</b> |
| 2  | 242.1863         | 121.5968         | 225.1598         | 113.0835         |                  |                  | <b>I</b> | 2635.3627        | <b>1318.1850</b> | 2618.3362        | 1309.6717        | 2617.3521      | 1309.1797        | <b>24</b> |
| 3  | 299.2078         | 150.1075         | 282.1812         | 141.5942         |                  |                  | <b>G</b> | 2522.2786        | <b>1261.6430</b> | 2505.2521        | 1253.1297        | 2504.2681      | 1252.6377        | <b>23</b> |
| 4  | 398.2762         | 199.6417         | 381.2496         | 191.1285         |                  |                  | <b>V</b> | 2465.2572        | 1233.1322        | 2448.2306        | 1224.6190        | 2447.2466      | 1224.1269        | <b>22</b> |
| 5  | <b>527.3188</b>  | 264.1630         | 510.2922         | 255.6498         | 509.3082         | 255.1577         | <b>E</b> | 2366.1888        | <b>1183.5980</b> | 2349.1622        | 1175.0847        | 2348.1782      | 1174.5927        | <b>21</b> |
| 6  | 640.4028         | 320.7051         | 623.3763         | 312.1918         | 622.3923         | 311.6998         | <b>L</b> | 2237.1462        | <b>1119.0767</b> | 2220.1196        | 1110.5635        | 2219.1356      | 1110.0714        | <b>20</b> |
| 7  | <b>753.4869</b>  | 377.2471         | 736.4604         | 368.7338         | 735.4763         | 368.2418         | <b>I</b> | 2124.0621        | <b>1062.5347</b> | 2107.0356        | 1054.0214        | 2106.0515      | 1053.5294        | <b>19</b> |
| 8  | 824.5240         | 412.7656         | 807.4975         | 404.2524         | 806.5135         | 403.7604         | <b>A</b> | 2010.9780        | <b>1005.9927</b> | 1993.9515        | 997.4794         | 1992.9675      | 996.9874         | <b>18</b> |
| 9  | <b>895.5611</b>  | 448.2842         | 878.5346         | 439.7709         | 877.5506         | 439.2789         | <b>A</b> | 1939.9409        | <b>970.4741</b>  | 1922.9144        | 961.9608         | 1921.9304      | 961.4688         | <b>17</b> |
| 10 | 982.5932         | 491.8002         | 965.5666         | 483.2869         | 964.5826         | 482.7949         | <b>S</b> | <b>1868.9038</b> | 934.9555         | <b>1851.8773</b> | 926.4423         | 1850.8933      | 925.9503         | <b>16</b> |
| 11 | <b>1083.6408</b> | <b>542.3241</b>  | 1066.6143        | 533.8108         | 1065.6303        | 533.3188         | <b>T</b> | 1781.8718        | <b>891.4395</b>  | 1764.8452        | 882.9263         | 1763.8612      | 882.4343         | <b>15</b> |
| 12 | 1198.6678        | <b>599.8375</b>  | 1181.6412        | 591.3243         | 1180.6572        | 590.8322         | <b>D</b> | <b>1680.8241</b> | 840.9157         | 1663.7976        | 832.4024         | 1662.8135      | 831.9104         | <b>14</b> |
| 13 | <b>1285.6998</b> | 643.3535         | <b>1268.6733</b> | 634.8403         | 1267.6892        | 634.3483         | <b>S</b> | <b>1565.7972</b> | <b>783.4022</b>  | 1548.7706        | 774.8889         | 1547.7866      | 774.3969         | <b>13</b> |
| 14 | <b>1422.7587</b> | <b>711.8830</b>  | 1405.7322        | 703.3697         | 1404.7482        | 702.8777         | <b>H</b> | 1478.7651        | 739.8862         | 1461.7386        | 731.3729         | 1460.7546      | 730.8809         | <b>12</b> |
| 15 | 1569.8271        | 785.4172         | 1552.8006        | 776.9039         | <b>1551.8166</b> | 776.4119         | <b>F</b> | 1341.7062        | 671.3568         | 1324.6797        | 662.8435         | 1323.6957      | 662.3515         | <b>11</b> |
| 16 | 1656.8592        | 828.9332         | 1639.8326        | 820.4199         | <b>1638.8486</b> | 819.9279         | <b>S</b> | <b>1194.6378</b> | 597.8225         | 1177.6113        | 589.3093         | 1176.6273      | 588.8173         | <b>10</b> |
| 17 | 1793.9181        | 897.4627         | 1776.8915        | 888.9494         | 1775.9075        | 888.4574         | <b>H</b> | 1107.6058        | <b>554.3065</b>  | 1090.5792        | 545.7933         | 1089.5952      | 545.3012         | <b>9</b>  |
| 18 | 1907.0021        | 954.0047         | 1889.9756        | 945.4914         | 1888.9916        | 944.9994         | <b>L</b> | <b>970.5469</b>  | 485.7771         | 953.5203         | 477.2638         | 952.5363       | 476.7718         | <b>8</b>  |
| 19 | 1978.0393        | <b>989.5233</b>  | 1961.0127        | 981.0100         | 1960.0287        | 980.5180         | <b>A</b> | <b>857.4628</b>  | 429.2350         | 840.4363         | 420.7218         | 839.4522       | 420.2298         | <b>7</b>  |
| 20 | 2164.1186        | <b>1082.5629</b> | 2147.0920        | 1074.0496        | 2146.1080        | 1073.5576        | <b>W</b> | <b>786.4257</b>  | 393.7165         | 769.3991         | 385.2032         | 768.4151       | 384.7112         | <b>6</b>  |
| 21 | 2277.2026        | 1139.1050        | 2260.1761        | 1130.5917        | 2259.1921        | 1130.0997        | <b>I</b> | <b>600.3464</b>  | <b>300.6768</b>  | 583.3198         | <b>292.1636</b>  | 582.3358       | <b>291.6715</b>  | <b>5</b>  |
| 22 | 2391.2456        | 1196.1264        | 2374.2190        | <b>1187.6131</b> | 2373.2350        | <b>1187.1211</b> | <b>N</b> | <b>487.2623</b>  | 244.1348         | 470.2358         | 235.6215         | 469.2518       | 235.1295         | <b>4</b>  |
| 23 | 2492.2932        | 1246.6503        | 2475.2667        | 1238.1370        | 2474.2827        | 1237.6450        | <b>T</b> | 373.2194         | 187.1133         | 356.1928         | 178.6001         | 355.2088       | 178.1081         | <b>3</b>  |
| 24 | 2589.3460        | 1295.1766        | 2572.3194        | <b>1286.6634</b> | 2571.3354        | <b>1286.1714</b> | <b>P</b> | 272.1717         | 136.5895         | 255.1452         | 128.0762         |                |                  | <b>2</b>  |



|    |  |  |  |  |  |  |   |          |         |          |         |  |  |  |   |
|----|--|--|--|--|--|--|---|----------|---------|----------|---------|--|--|--|---|
| 25 |  |  |  |  |  |  | R | 175.1190 | 88.0631 | 158.0924 | 79.5498 |  |  |  | 1 |
|----|--|--|--|--|--|--|---|----------|---------|----------|---------|--|--|--|---|

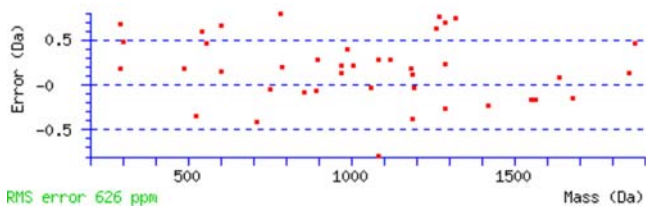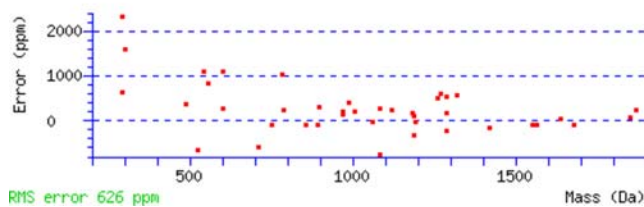

NCBI BLAST search of [KIGVELIAASTDSHFSLAWINTPR](#)  
 (Parameters: blastp, nr protein database, expect=20000, no filter, PAM30)  
 Other BLAST [web gateways](#)

**All matches to this query**

| Score | Mr(calc): | Delta   | Sequence                                    |
|-------|-----------|---------|---------------------------------------------|
| 43.6  | 2762.4504 | 2.0623  | <a href="#">KIGVELIAASTDSHFSLAWINTPR</a>    |
| 6.4   | 2764.3537 | 0.1590  | <a href="#">QNQRSMFDHLSYLLQNSGIGLGMR</a>    |
| 5.6   | 2765.4647 | -0.9520 | <a href="#">VRVTHVTSPGNICVQLLQFDNQLK</a>    |
| 3.1   | 2764.5594 | -0.0467 | <a href="#">LISADSKANVLHGLSILELCLIIAMK</a>  |
| 0.8   | 2766.1995 | -1.6868 | <a href="#">EMMQIADPGNFHHCQNHSCKNLR</a>     |
| 0.7   | 2765.2160 | -0.7033 | <a href="#">MSGSPNCQTFSSSTVISYSSTDPGTPK</a> |

Mascot: <http://www.matrixscience.com/>

# MASCOT SCIENCE Mascot Search Results

## Peptide View

MS/MS Fragmentation of **KPVLETEVNHVSPLSDASK**

Found in [gi|57770449|ref|NP\\_001009895.1|](#), hypothetical protein LOC393165 isoform 1 [Danio rerio]

Match to Query 50085: 2049.362724 from(1025.688638,2+) index(51507)

Data file TCDD\_0530.dta

Click mouse within plot area to zoom in by factor of two about that point

Or, Plot from  to  Da

Label all possible matches  Label matches used for scoring

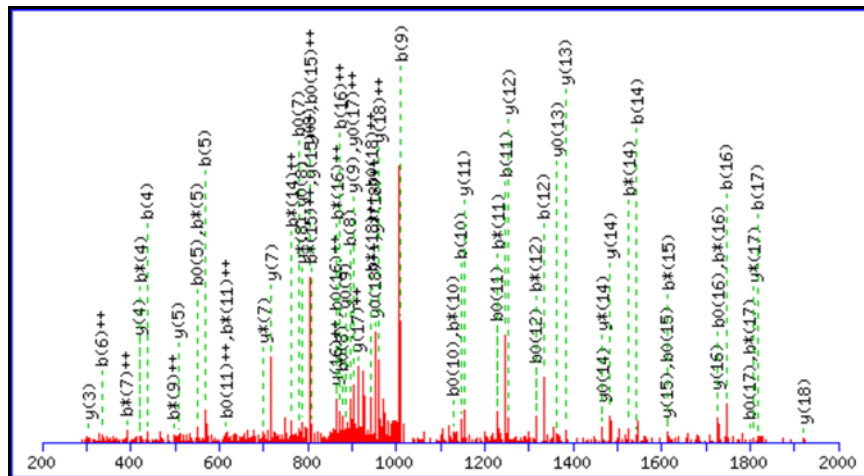

Monoisotopic mass of neutral peptide Mr(calc): 2049.0742

Ions Score: 42 Expect: 0.014

Matches : 70/206 fragment ions using 164 most intense peaks [\(help\)](#)

| #  | b         | b <sup>++</sup> | b <sup>*</sup> | b <sup>*++</sup> | b <sup>0</sup> | b <sup>0++</sup> | Seq. | y         | y <sup>++</sup> | y <sup>*</sup> | y <sup>*++</sup> | y <sup>0</sup> | y <sup>0++</sup> | #  |
|----|-----------|-----------------|----------------|------------------|----------------|------------------|------|-----------|-----------------|----------------|------------------|----------------|------------------|----|
| 1  | 129.1022  | 65.0548         | 112.0757       | 56.5415          |                |                  | K    |           |                 |                |                  |                |                  | 19 |
| 2  | 226.1550  | 113.5811        | 209.1285       | 105.0679         |                |                  | P    | 1921.9865 | 961.4969        | 1904.9600      | 952.9836         | 1903.9760      | 952.4916         | 18 |
| 3  | 325.2234  | 163.1153        | 308.1969       | 154.6021         |                |                  | V    | 1824.9338 | 912.9705        | 1807.9072      | 904.4573         | 1806.9232      | 903.9652         | 17 |
| 4  | 438.3075  | 219.6574        | 421.2809       | 211.1441         |                |                  | L    | 1725.8654 | 863.4363        | 1708.8388      | 854.9230         | 1707.8548      | 854.4310         | 16 |
| 5  | 567.3501  | 284.1787        | 550.3235       | 275.6654         | 549.3395       | 275.1734         | E    | 1612.7813 | 806.8943        | 1595.7548      | 798.3810         | 1594.7707      | 797.8890         | 15 |
| 6  | 668.3978  | 334.7025        | 651.3712       | 326.1892         | 650.3872       | 325.6972         | T    | 1483.7387 | 742.3730        | 1466.7122      | 733.8597         | 1465.7281      | 733.3677         | 14 |
| 7  | 797.4403  | 399.2238        | 780.4138       | 390.7105         | 779.4298       | 390.2185         | E    | 1382.6910 | 691.8492        | 1365.6645      | 683.3359         | 1364.6805      | 682.8439         | 13 |
| 8  | 896.5088  | 448.7580        | 879.4822       | 440.2447         | 878.4982       | 439.7527         | V    | 1253.6484 | 627.3279        | 1236.6219      | 618.8146         | 1235.6379      | 618.3226         | 12 |
| 9  | 1010.5517 | 505.7795        | 993.5251       | 497.2662         | 992.5411       | 496.7742         | N    | 1154.5800 | 577.7937        | 1137.5535      | 569.2804         | 1136.5695      | 568.7884         | 11 |
| 10 | 1147.6106 | 574.3089        | 1130.5841      | 565.7957         | 1129.6000      | 565.3037         | H    | 1040.5371 | 520.7722        | 1023.5106      | 512.2589         | 1022.5265      | 511.7669         | 10 |
| 11 | 1246.6790 | 623.8431        | 1229.6525      | 615.3299         | 1228.6684      | 614.8379         | V    | 903.4782  | 452.2427        | 886.4516       | 443.7295         | 885.4676       | 443.2374         | 9  |
| 12 | 1333.7110 | 667.3592        | 1316.6845      | 658.8459         | 1315.7005      | 658.3539         | S    | 804.4098  | 402.7085        | 787.3832       | 394.1953         | 786.3992       | 393.7032         | 8  |
| 13 | 1430.7638 | 715.8855        | 1413.7373      | 707.3723         | 1412.7532      | 706.8803         | P    | 717.3777  | 359.1925        | 700.3512       | 350.6792         | 699.3672       | 350.1872         | 7  |
| 14 | 1543.8479 | 772.4276        | 1526.8213      | 763.9143         | 1525.8373      | 763.4223         | L    | 620.3250  | 310.6661        | 603.2984       | 302.1529         | 602.3144       | 301.6608         | 6  |
| 15 | 1630.8799 | 815.9436        | 1613.8533      | 807.4303         | 1612.8693      | 806.9383         | S    | 507.2409  | 254.1241        | 490.2144       | 245.6108         | 489.2304       | 245.1188         | 5  |
| 16 | 1745.9068 | 873.4571        | 1728.8803      | 864.9438         | 1727.8963      | 864.4518         | D    | 420.2089  | 210.6081        | 403.1823       | 202.0948         | 402.1983       | 201.6028         | 4  |
| 17 | 1816.9440 | 908.9756        | 1799.9174      | 900.4623         | 1798.9334      | 899.9703         | A    | 305.1819  | 153.0946        | 288.1554       | 144.5813         | 287.1714       | 144.0893         | 3  |
| 18 | 1903.9760 | 952.4916        | 1886.9494      | 943.9784         | 1885.9654      | 943.4863         | S    | 234.1448  | 117.5761        | 217.1183       | 109.0628         | 216.1343       | 108.5708         | 2  |
| 19 |           |                 |                |                  |                |                  | K    | 147.1128  | 74.0600         | 130.0863       | 65.5468          |                |                  | 1  |

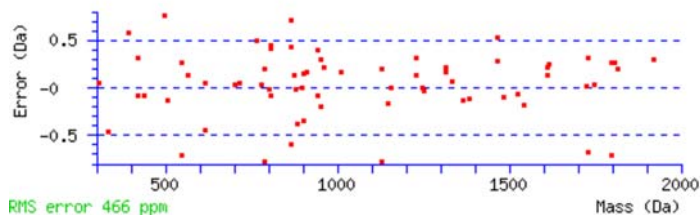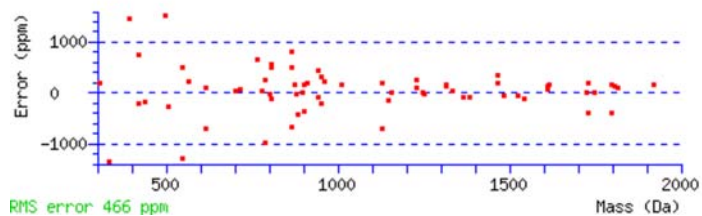

NCBI BLAST search of [KPVLETEVNHVSPLSDASK](#)  
 (Parameters: blastp, nr protein database, expect=20000, no filter, PAM30)  
 Other BLAST [web gateways](#)

**All matches to this query**

| Score | Mr(calc): | Delta   | Sequence                            |
|-------|-----------|---------|-------------------------------------|
| 41.9  | 2049.0742 | 0.2885  | <a href="#">KPVLETEVNHVSPLSDASK</a> |
| 7.7   | 2049.1510 | 0.2117  | <a href="#">LIQLVSLYGDKSWSIISK</a>  |
| 7.2   | 2048.0902 | 1.2725  | <a href="#">QEISITFQQQTKLLSER</a>   |
| 4.2   | 2049.9160 | -0.5533 | <a href="#">QTEIEAERCGESEVVDEK</a>  |
| 2.5   | 2048.9871 | 0.3757  | <a href="#">ELLSCISLSPDGLTCAQR</a>  |
| 1.0   | 2050.9135 | -1.5508 | <a href="#">HMLVHTGEKTHQCDQCGK</a>  |
| 0.4   | 2050.8916 | -1.5288 | <a href="#">EQGLHSPGWGNDPGCPTSR</a> |
| 0.2   | 2048.9374 | 0.4253  | <a href="#">ICSEHFSPEDFRAVNGNK</a>  |

Mascot: <http://www.matrixscience.com/>

# **MASCOT** SCIENCE Mascot Search Results

## Peptide View

MS/MS Fragmentation of **LDISTLTGVPEEHIK**

Found in [gi|66472400|ref|NP\\_001018512.1](#), NADH dehydrogenase (ubiquinone) Fe-S protein 4, (NADH-coenzyme Q reductase) [Danio rerio]

Match to Query 27811: 1652.172724 from(827.093638,2+) index(33332)

Data file TCDD\_0530.dta

Click mouse within plot area to zoom in by factor of two about that point

Or,   to  Da

Label all possible matches  Label matches used for scoring

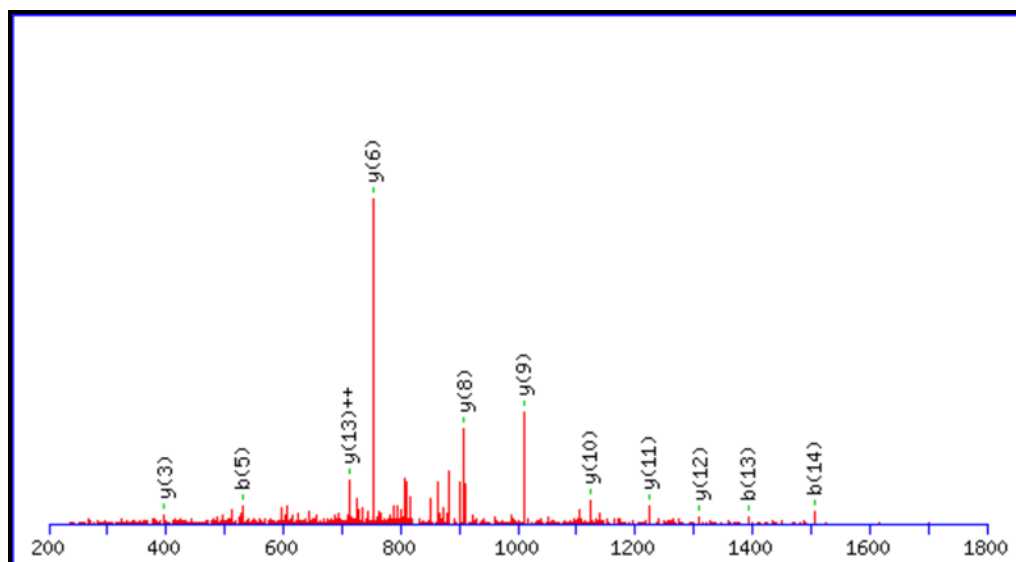

Monoisotopic mass of neutral peptide  $M_r(\text{calc})$ : 1650.8828

Ions Score: 54 Expect: 0.00097

Matches : 11/132 fragment ions using 14 most intense peaks ([help](#))

| #  | b         | b <sup>++</sup> | b <sup>0</sup> | b <sup>0++</sup> | Seq. | y         | y <sup>++</sup> | y <sup>*</sup> | y <sup>*++</sup> | y <sup>0</sup> | y <sup>0++</sup> | #  |
|----|-----------|-----------------|----------------|------------------|------|-----------|-----------------|----------------|------------------|----------------|------------------|----|
| 1  | 114.0913  | 57.5493         |                |                  | L    |           |                 |                |                  |                |                  | 15 |
| 2  | 229.1183  | 115.0628        | 211.1077       | 106.0575         | D    | 1538.8061 | 769.9067        | 1521.7795      | 761.3934         | 1520.7955      | 760.9014         | 14 |
| 3  | 342.2023  | 171.6048        | 324.1918       | 162.5995         | I    | 1423.7791 | 712.3932        | 1406.7526      | 703.8799         | 1405.7686      | 703.3879         | 13 |
| 4  | 429.2344  | 215.1208        | 411.2238       | 206.1155         | S    | 1310.6951 | 655.8512        | 1293.6685      | 647.3379         | 1292.6845      | 646.8459         | 12 |
| 5  | 530.2821  | 265.6447        | 512.2715       | 256.6394         | T    | 1223.6630 | 612.3352        | 1206.6365      | 603.8219         | 1205.6525      | 603.3299         | 11 |
| 6  | 643.3661  | 322.1867        | 625.3556       | 313.1814         | L    | 1122.6154 | 561.8113        | 1105.5888      | 553.2980         | 1104.6048      | 552.8060         | 10 |
| 7  | 744.4138  | 372.7105        | 726.4032       | 363.7053         | T    | 1009.5313 | 505.2693        | 992.5047       | 496.7560         | 991.5207       | 496.2640         | 9  |
| 8  | 801.4353  | 401.2213        | 783.4247       | 392.2160         | G    | 908.4836  | 454.7454        | 891.4571       | 446.2322         | 890.4730       | 445.7402         | 8  |
| 9  | 900.5037  | 450.7555        | 882.4931       | 441.7502         | V    | 851.4621  | 426.2347        | 834.4356       | 417.7214         | 833.4516       | 417.2294         | 7  |
| 10 | 997.5564  | 499.2819        | 979.5459       | 490.2766         | P    | 752.3937  | 376.7005        | 735.3672       | 368.1872         | 734.3832       | 367.6952         | 6  |
| 11 | 1126.5990 | 563.8032        | 1108.5885      | 554.7979         | E    | 655.3410  | 328.1741        | 638.3144       | 319.6608         | 637.3304       | 319.1688         | 5  |
| 12 | 1255.6416 | 628.3245        | 1237.6311      | 619.3192         | E    | 526.2984  | 263.6528        | 509.2718       | 255.1395         | 508.2878       | 254.6475         | 4  |
| 13 | 1392.7005 | 696.8539        | 1374.6900      | 687.8486         | H    | 397.2558  | 199.1315        | 380.2292       | 190.6183         |                |                  | 3  |

|    |           |          |           |          |   |          |          |          |          |  |  |   |
|----|-----------|----------|-----------|----------|---|----------|----------|----------|----------|--|--|---|
| 14 | 1505.7846 | 753.3959 | 1487.7740 | 744.3907 | I | 260.1969 | 130.6021 | 243.1703 | 122.0888 |  |  | 2 |
| 15 |           |          |           |          | K | 147.1128 | 74.0600  | 130.0863 | 65.5468  |  |  | 1 |

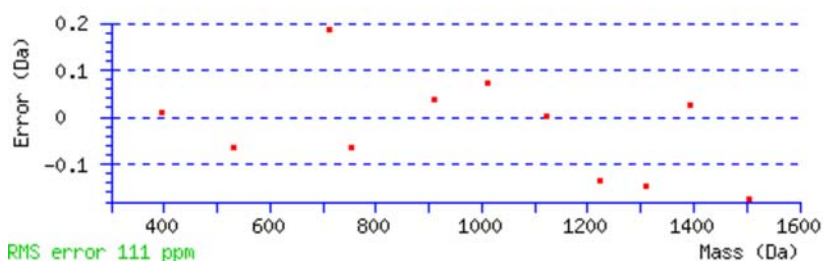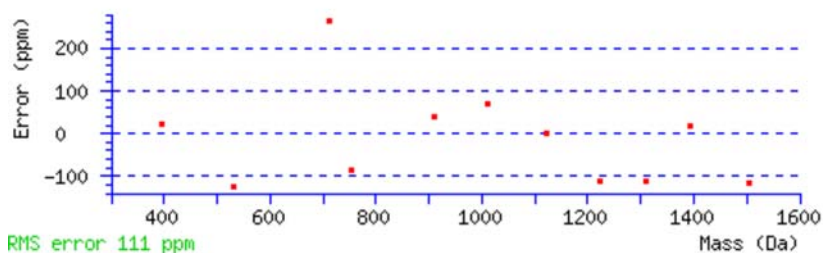

NCBI **BLAST** search of [LDISTLTGVPEEHIK](#)

(Parameters: blastp, nr protein database, expect=20000, no filter, PAM30)

Other BLAST [web gateways](#)

**All matches to this query**

| Score | Mr(calc): | Delta   | Sequence                        |
|-------|-----------|---------|---------------------------------|
| 54.1  | 1650.8828 | 1.2899  | <a href="#">LDISTLTGVPEEHIK</a> |
| 8.0   | 1650.8399 | 1.3328  | <a href="#">ITDFGLSRVAENVCK</a> |
| 4.8   | 1650.6840 | 1.4887  | <a href="#">EFVCSECERSFMK</a>   |
| 3.0   | 1653.7338 | -1.5611 | <a href="#">DLDKSSTGVSNCPCK</a> |
| 2.8   | 1650.8366 | 1.3361  | <a href="#">WTGDPGVNITVHDLK</a> |
| 1.4   | 1650.8617 | 1.3110  | <a href="#">FLESQEFQPSIAKK</a>  |
| 0.9   | 1653.9202 | -1.7475 | <a href="#">RDFNSLAVLEIHLK</a>  |
| 0.8   | 1650.7274 | 1.4453  | <a href="#">EKEQQQEDEFWR</a>    |
| 0.8   | 1649.7296 | 2.4431  | <a href="#">FWEKCYFSQEQR</a>    |
| 0.7   | 1651.8610 | 0.3117  | <a href="#">FLATWQGPYTVLEK</a>  |

Mascot: <http://www.matrixscience.com/>

# Mascot Search Results

## Peptide View

MS/MS Fragmentation of **LDYQVELQNLHR**

Found in [gi|54400426|ref|NP\\_001005960.1](#), ATP synthase, H<sup>+</sup> transporting, mitochondrial F0 complex, subunit b, isoform 1 [Danio rerio]

Match to Query 24030: 1526.872724 from(764.443638,2+) index(42802)

Data file TCDD\_0530.dta

Click mouse within plot area to zoom in by factor of two about that point

Or, Plot from  to  Da

Label all possible matches  Label matches used for scoring

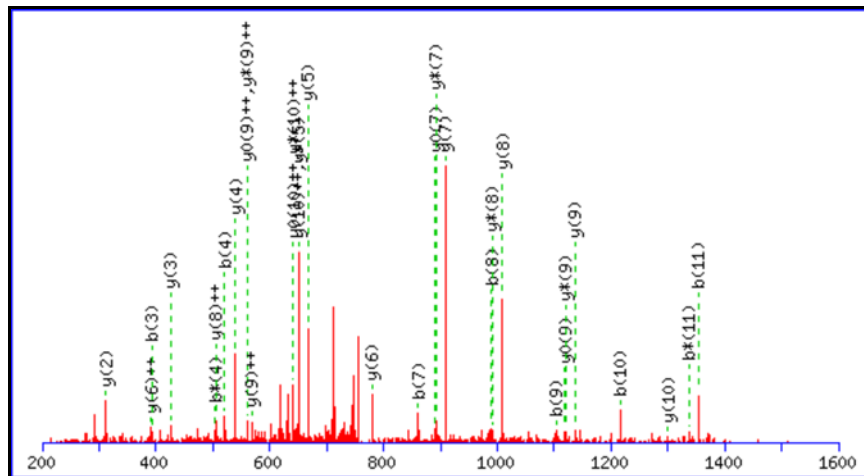

Monoisotopic mass of neutral peptide  $M_r(\text{calc})$ : 1526.7841

Ions Score: 50 Expect: 0.0028

Matches : 32/112 fragment ions using 62 most intense peaks ([help](#))

| #  | b                | b <sup>++</sup> | b*               | b <sup>*++</sup> | b <sup>0</sup> | b <sup>0++</sup> | Seq. | y                | y <sup>++</sup> | y*               | y <sup>*++</sup> | y <sup>0</sup>   | y <sup>0++</sup> | #  |
|----|------------------|-----------------|------------------|------------------|----------------|------------------|------|------------------|-----------------|------------------|------------------|------------------|------------------|----|
| 1  | 114.0913         | 57.5493         |                  |                  |                |                  | L    |                  |                 |                  |                  |                  |                  | 12 |
| 2  | 229.1183         | 115.0628        |                  |                  | 211.1077       | 106.0575         | D    | 1414.7074        | 707.8573        | 1397.6808        | 699.3440         | 1396.6968        | 698.8520         | 11 |
| 3  | <b>392.1816</b>  | 196.5944        |                  |                  | 374.1710       | 187.5892         | Y    | <b>1299.6804</b> | <b>650.3438</b> | 1282.6539        | <b>641.8306</b>  | 1281.6698        | <b>641.3386</b>  | 10 |
| 4  | <b>520.2402</b>  | 260.6237        | <b>503.2136</b>  | 252.1105         | 502.2296       | 251.6185         | Q    | <b>1136.6171</b> | <b>568.8122</b> | <b>1119.5905</b> | <b>560.2989</b>  | <b>1118.6065</b> | <b>559.8069</b>  | 9  |
| 5  | 619.3086         | 310.1579        | 602.2821         | 301.6447         | 601.2980       | 301.1527         | V    | <b>1008.5585</b> | <b>504.7829</b> | <b>991.5320</b>  | 496.2696         | 990.5479         | 495.7776         | 8  |
| 6  | 748.3512         | 374.6792        | 731.3246         | 366.1660         | 730.3406       | 365.6740         | E    | <b>909.4901</b>  | 455.2487        | <b>892.4635</b>  | 446.7354         | <b>891.4795</b>  | 446.2434         | 7  |
| 7  | <b>861.4353</b>  | 431.2213        | 844.4087         | 422.7080         | 843.4247       | 422.2160         | L    | <b>780.4475</b>  | <b>390.7274</b> | 763.4209         | 382.2141         |                  |                  | 6  |
| 8  | <b>989.4938</b>  | 495.2506        | 972.4673         | 486.7373         | 971.4833       | 486.2453         | Q    | <b>667.3634</b>  | 334.1854        | <b>650.3369</b>  | 325.6721         |                  |                  | 5  |
| 9  | <b>1103.5368</b> | 552.2720        | 1086.5102        | 543.7587         | 1085.5262      | 543.2667         | N    | <b>539.3049</b>  | 270.1561        | 522.2783         | 261.6428         |                  |                  | 4  |
| 10 | <b>1216.6208</b> | 608.8141        | 1199.5943        | 600.3008         | 1198.6103      | 599.8088         | L    | <b>425.2619</b>  | 213.1346        | 408.2354         | 204.6213         |                  |                  | 3  |
| 11 | <b>1353.6797</b> | 677.3435        | <b>1336.6532</b> | 668.8302         | 1335.6692      | 668.3382         | H    | <b>312.1779</b>  | 156.5926        | 295.1513         | 148.0793         |                  |                  | 2  |
| 12 |                  |                 |                  |                  |                |                  | R    | 175.1190         | 88.0631         | 158.0924         | 79.5498          |                  |                  | 1  |

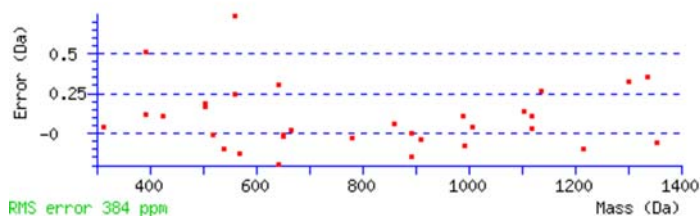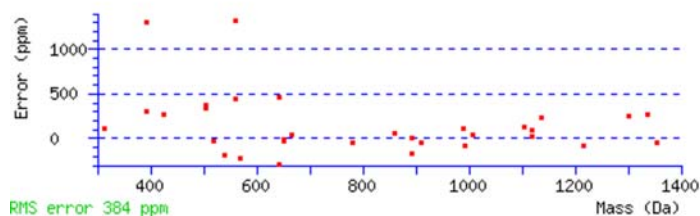

NCBI BLAST search of [LDYQVELQNLHR](#)

(Parameters: blastp, nr protein database, expect=20000, no filter, PAM30)

Other BLAST [web gateways](#)

**All matches to this query**

| Score | Mr(calc): | Delta   | Sequence                        |
|-------|-----------|---------|---------------------------------|
| 49.8  | 1526.7841 | 0.0886  | <a href="#">LDYQVELQNLHR</a>    |
| 10.8  | 1526.8052 | 0.0675  | <a href="#">TPLLNGAEDSKLNR</a>  |
| 9.3   | 1524.6063 | 2.2664  | <a href="#">DGSEEKSSDAEEDK</a>  |
| 6.7   | 1526.7486 | 0.1241  | <a href="#">FLHKHMDLICR</a>     |
| 6.1   | 1526.7108 | 0.1619  | <a href="#">NYMIKMNELEDK</a>    |
| 6.0   | 1526.7043 | 0.1684  | <a href="#">APGSCKLYEMLCR</a>   |
| 4.6   | 1525.7816 | 1.0911  | <a href="#">INYPEITLSWYK</a>    |
| 4.2   | 1527.7902 | -0.9174 | <a href="#">AMSTLVPQGGPVLCR</a> |
| 4.2   | 1527.8144 | -0.9417 | <a href="#">AIEIIKSDPTEQGK</a>  |
| 4.1   | 1526.7841 | 0.0886  | <a href="#">VEYPINTDAPPRR</a>   |

Mascot: <http://www.matrixscience.com/>

# **MASCOT** SCIENCE Mascot Search Results

## Peptide View

MS/MS Fragmentation of **LGISDSEFLTAAK**

Found in [gi|50344731|ref|NP\\_001002039.1](#), fibrinogen alpha chain [Danio rerio]

Match to Query 18967: 1352.212724 from(677.113638,2+) index(9147)

Data file TCDD\_0530.dta

Click mouse within plot area to zoom in by factor of two about that point

Or, Plot from  to  Da

Label all possible matches  Label matches used for scoring

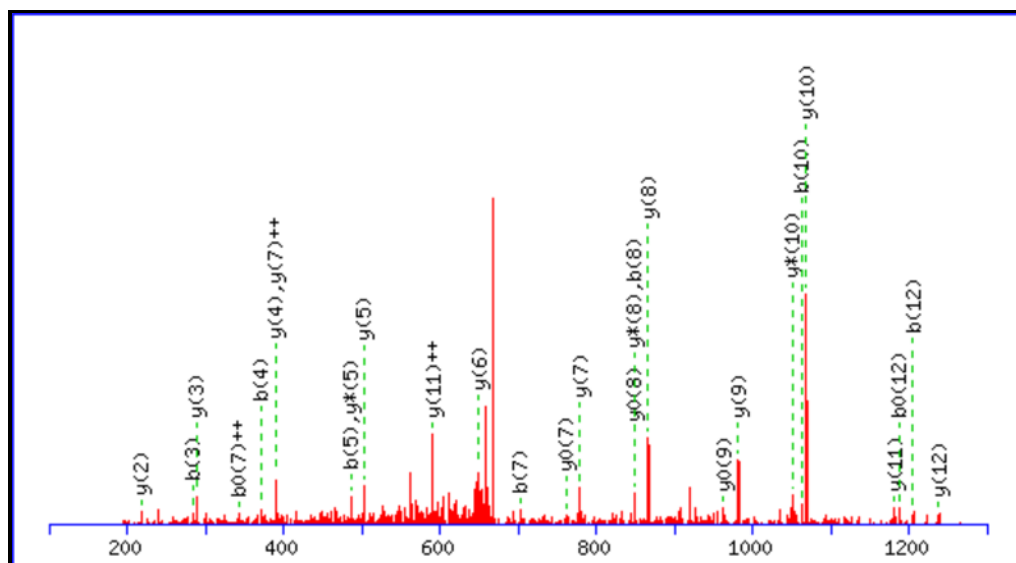

Monoisotopic mass of neutral peptide  $M_r(\text{calc})$ : 1350.7031

Ions Score: 74 Expect: 1.1e-005

Matches : 28/108 fragment ions using 55 most intense peaks ([help](#))

| #  | b         | b <sup>++</sup> | b <sup>0</sup> | b <sup>0++</sup> | Seq. | y         | y <sup>++</sup> | y*        | y <sup>*++</sup> | y <sup>0</sup> | y <sup>0++</sup> | #  |
|----|-----------|-----------------|----------------|------------------|------|-----------|-----------------|-----------|------------------|----------------|------------------|----|
| 1  | 114.0913  | 57.5493         |                |                  | L    |           |                 |           |                  |                |                  | 13 |
| 2  | 171.1128  | 86.0600         |                |                  | G    | 1238.6263 | 619.8168        | 1221.5998 | 611.3035         | 1220.6157      | 610.8115         | 12 |
| 3  | 284.1969  | 142.6021        |                |                  | I    | 1181.6048 | 591.3061        | 1164.5783 | 582.7928         | 1163.5943      | 582.3008         | 11 |
| 4  | 371.2289  | 186.1181        | 353.2183       | 177.1128         | S    | 1068.5208 | 534.7640        | 1051.4942 | 526.2508         | 1050.5102      | 525.7587         | 10 |
| 5  | 486.2558  | 243.6316        | 468.2453       | 234.6263         | D    | 981.4888  | 491.2480        | 964.4622  | 482.7347         | 963.4782       | 482.2427         | 9  |
| 6  | 573.2879  | 287.1476        | 555.2773       | 278.1423         | S    | 866.4618  | 433.7345        | 849.4353  | 425.2213         | 848.4512       | 424.7293         | 8  |
| 7  | 702.3305  | 351.6689        | 684.3199       | 342.6636         | E    | 779.4298  | 390.2185        | 762.4032  | 381.7053         | 761.4192       | 381.2132         | 7  |
| 8  | 849.3989  | 425.2031        | 831.3883       | 416.1978         | F    | 650.3872  | 325.6972        | 633.3606  | 317.1840         | 632.3766       | 316.6920         | 6  |
| 9  | 962.4829  | 481.7451        | 944.4724       | 472.7398         | L    | 503.3188  | 252.1630        | 486.2922  | 243.6498         | 485.3082       | 243.1577         | 5  |
| 10 | 1063.5306 | 532.2689        | 1045.5201      | 523.2637         | T    | 390.2347  | 195.6210        | 373.2082  | 187.1077         | 372.2241       | 186.6157         | 4  |
| 11 | 1134.5677 | 567.7875        | 1116.5572      | 558.7822         | A    | 289.1870  | 145.0972        | 272.1605  | 136.5839         |                |                  | 3  |
| 12 | 1205.6048 | 603.3061        | 1187.5943      | 594.3008         | A    | 218.1499  | 109.5786        | 201.1234  | 101.0653         |                |                  | 2  |
| 13 |           |                 |                |                  | K    | 147.1128  | 74.0600         | 130.0863  | 65.5468          |                |                  | 1  |



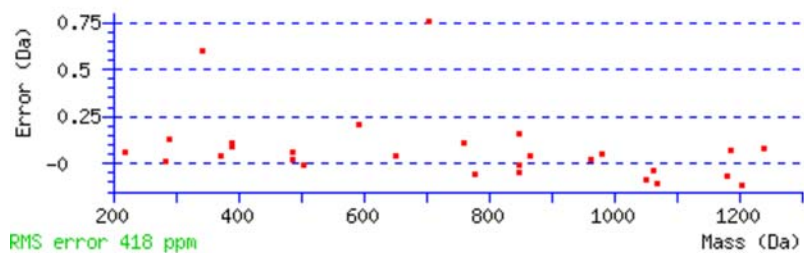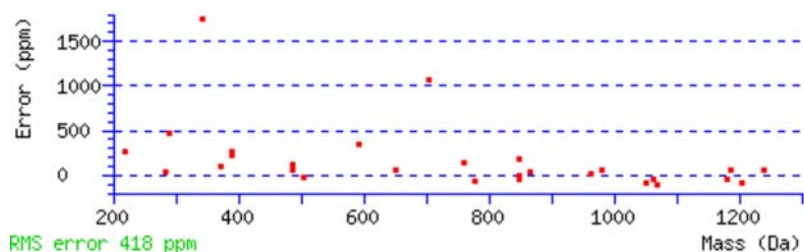

NCBI **BLAST** search of [LGISDSEFLTAAK](#)

(Parameters: blastp, nr protein database, expect=20000, no filter, PAM30)

Other BLAST [web gateways](#)

**All matches to this query**

| Score | Mr(calc): | Delta   | Sequence                      |
|-------|-----------|---------|-------------------------------|
| 74.1  | 1350.7031 | 1.5096  | <a href="#">LGISDSEFLTAAK</a> |
| 12.3  | 1350.7329 | 1.4798  | <a href="#">AVRCYESLILK</a>   |
| 10.7  | 1350.6271 | 1.5856  | <a href="#">QSQAASMELMQK</a>  |
| 10.1  | 1351.7096 | 0.5032  | <a href="#">EGPSDLLGSPKR</a>  |
| 9.7   | 1351.6224 | 0.5903  | <a href="#">EKTGACIQCSAK</a>  |
| 9.4   | 1354.6993 | -2.4866 | <a href="#">FQSRLAYDSLK</a>   |
| 8.9   | 1351.7136 | 0.4992  | <a href="#">ELKGYYPNQK</a>    |
| 8.4   | 1350.6965 | 1.5162  | <a href="#">SELRQFAEMLK</a>   |
| 7.6   | 1351.7401 | 0.4726  | <a href="#">FPQIKAHPWTK</a>   |
| 6.8   | 1352.6031 | -0.3903 | <a href="#">EVGCDFGINSNAK</a> |

Mascot: <http://www.matrixscience.com/>

# MASCOT SCIENCE Mascot Search Results

## Peptide View

MS/MS Fragmentation of **LHGGTPANFLDVGGGATAQQVTEAFK**

Found in [gi|54261767|ref|NP\\_998191.1](#), succinate-CoA ligase, ADP-forming, beta subunit [Danio rerio]

Match to Query 96079: 2586.302724 from(1294.158638,2+) index(34622)

Data file TCDD\_0530.dta

Click mouse within plot area to zoom in by factor of two about that point

Or, Plot from  to  Da

Label all possible matches  Label matches used for scoring

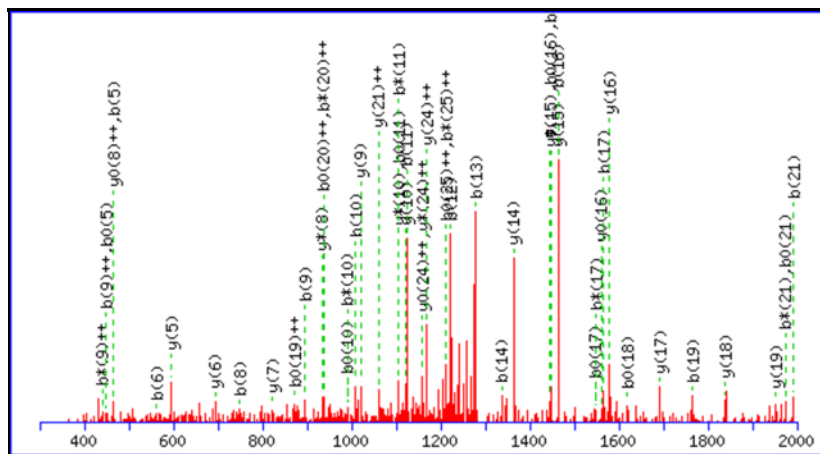

Monoisotopic mass of neutral peptide Mr(calc): 2585.2874

Ions Score: 48 Expect: 0.0022

Matches : 53/272 fragment ions using 102 most intense peaks ([help](#))

| #  | b                | b <sup>++</sup> | b*               | b <sup>*++</sup> | b <sup>0</sup>   | b <sup>0++</sup> | Seq. | y                | y <sup>++</sup>  | y*               | y <sup>*++</sup> | y <sup>0</sup>   | y <sup>0++</sup> | #  |
|----|------------------|-----------------|------------------|------------------|------------------|------------------|------|------------------|------------------|------------------|------------------|------------------|------------------|----|
| 1  | 114.0913         | 57.5493         |                  |                  |                  |                  | L    |                  |                  |                  |                  |                  |                  | 26 |
| 2  | 251.1503         | 126.0788        |                  |                  |                  |                  | H    | 2473.2106        | 1237.1090        | 2456.1841        | 1228.5957        | 2455.2001        | 1228.1037        | 25 |
| 3  | 308.1717         | 154.5895        |                  |                  |                  |                  | G    | 2336.1517        | <b>1168.5795</b> | 2319.1252        | <b>1160.0662</b> | 2318.1412        | <b>1159.5742</b> | 24 |
| 4  | 365.1932         | 183.1002        |                  |                  |                  |                  | G    | 2279.1303        | 1140.0688        | 2262.1037        | 1131.5555        | 2261.1197        | 1131.0635        | 23 |
| 5  | <b>466.2409</b>  | 233.6241        |                  |                  | <b>448.2303</b>  | 224.6188         | T    | 2222.1088        | 1111.5580        | 2205.0822        | 1103.0448        | 2204.0982        | 1102.5528        | 22 |
| 6  | <b>563.2936</b>  | 282.1504        |                  |                  | 545.2831         | 273.1452         | P    | 2121.0611        | <b>1061.0342</b> | 2104.0346        | 1052.5209        | 2103.0505        | 1052.0289        | 21 |
| 7  | 634.3307         | 317.6690        |                  |                  | 616.3202         | 308.6637         | A    | 2024.0083        | 1012.5078        | 2006.9818        | 1003.9945        | 2005.9978        | 1003.5025        | 20 |
| 8  | <b>748.3737</b>  | 374.6905        | 731.3471         | 366.1772         | 730.3631         | 365.6852         | N    | <b>1952.9712</b> | 976.9893         | 1935.9447        | 968.4760         | 1934.9607        | 967.9840         | 19 |
| 9  | <b>895.4421</b>  | <b>448.2247</b> | 878.4155         | <b>439.7114</b>  | 877.4315         | 439.2194         | F    | <b>1838.9283</b> | 919.9678         | 1821.9018        | 911.4545         | 1820.9177        | 910.9625         | 18 |
| 10 | <b>1008.5261</b> | 504.7667        | <b>991.4996</b>  | 496.2534         | <b>990.5156</b>  | 495.7614         | L    | <b>1691.8599</b> | 846.4336         | 1674.8333        | 837.9203         | 1673.8493        | 837.4283         | 17 |
| 11 | <b>1123.5531</b> | 562.2802        | <b>1106.5265</b> | 553.7669         | <b>1105.5425</b> | 553.2749         | D    | <b>1578.7758</b> | 789.8916         | 1561.7493        | 781.3783         | <b>1560.7653</b> | 780.8863         | 16 |
| 12 | <b>1222.6215</b> | 611.8144        | 1205.5950        | 603.3011         | 1204.6109        | 602.8091         | V    | <b>1463.7489</b> | 732.3781         | <b>1446.7223</b> | 723.8648         | <b>1445.7383</b> | 723.3728         | 15 |
| 13 | <b>1279.6430</b> | 640.3251        | 1262.6164        | 631.8118         | 1261.6324        | 631.3198         | G    | <b>1364.6805</b> | 682.8439         | 1347.6539        | 674.3306         | 1346.6699        | 673.8386         | 14 |
| 14 | <b>1336.6644</b> | 668.8359        | 1319.6379        | 660.3226         | 1318.6539        | 659.8306         | G    | 1307.6590        | 654.3331         | 1290.6325        | 645.8199         | 1289.6484        | 645.3279         | 13 |
| 15 | 1393.6859        | 697.3466        | 1376.6593        | 688.8333         | 1375.6753        | 688.3413         | G    | 1250.6375        | 625.8224         | 1233.6110        | 617.3091         | 1232.6270        | 616.8171         | 12 |
| 16 | <b>1464.7230</b> | 732.8651        | <b>1447.6965</b> | 724.3519         | <b>1446.7124</b> | 723.8599         | A    | 1193.6161        | 597.3117         | 1176.5895        | 588.7984         | 1175.6055        | 588.3064         | 11 |
| 17 | <b>1565.7707</b> | 783.3890        | <b>1548.7441</b> | 774.8757         | <b>1547.7601</b> | 774.3837         | T    | <b>1122.5790</b> | 561.7931         | <b>1105.5524</b> | 553.2798         | 1104.5684        | 552.7878         | 10 |
| 18 | 1636.8078        | 818.9075        | 1619.7812        | 810.3943         | <b>1618.7972</b> | 809.9023         | A    | <b>1021.5313</b> | 511.2693         | 1004.5047        | 502.7560         | 1003.5207        | 502.2640         | 9  |
| 19 | <b>1764.8664</b> | 882.9368        | 1747.8398        | 874.4236         | 1746.8558        | <b>873.9315</b>  | Q    | 950.4942         | 475.7507         | <b>933.4676</b>  | 467.2375         | 932.4836         | <b>466.7454</b>  | 8  |
| 20 | 1892.9250        | 946.9661        | 1875.8984        | <b>938.4528</b>  | 1874.9144        | <b>937.9608</b>  | Q    | <b>822.4356</b>  | 411.7214         | 805.4090         | 403.2082         | 804.4250         | 402.7162         | 7  |
| 21 | <b>1991.9934</b> | 996.5003        | <b>1974.9668</b> | 987.9870         | <b>1973.9828</b> | 987.4950         | V    | <b>694.3770</b>  | 347.6921         | 677.3505         | 339.1789         | 676.3665         | 338.6869         | 6  |
| 22 | 2093.0410        | 1047.0242       | 2076.0145        | 1038.5109        | 2075.0305        | 1038.0189        | T    | <b>595.3086</b>  | 298.1579         | 578.2821         | 289.6447         | 577.2980         | 289.1527         | 5  |
| 23 | 2222.0836        | 1111.5455       | 2205.0571        | 1103.0322        | 2204.0731        | 1102.5402        | E    | 494.2609         | 247.6341         | 477.2344         | 239.1208         | 476.2504         | 238.6288         | 4  |
| 24 | 2293.1208        | 1147.0640       | 2276.0942        | 1138.5507        | 2275.1102        | 1138.0587        | A    | 365.2183         | 183.1128         | 348.1918         | 174.5995         |                  |                  | 3  |

|    |           |           |           |           |           |           |   |          |          |          |          |  |  |   |
|----|-----------|-----------|-----------|-----------|-----------|-----------|---|----------|----------|----------|----------|--|--|---|
| 25 | 2440.1892 | 1220.5982 | 2423.1626 | 1212.0849 | 2422.1786 | 1211.5929 | F | 294.1812 | 147.5942 | 277.1547 | 139.0810 |  |  | 2 |
| 26 |           |           |           |           |           |           | K | 147.1128 | 74.0600  | 130.0863 | 65.5468  |  |  | 1 |

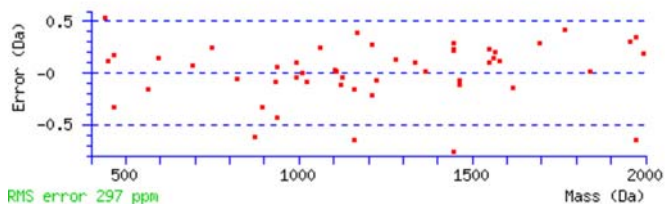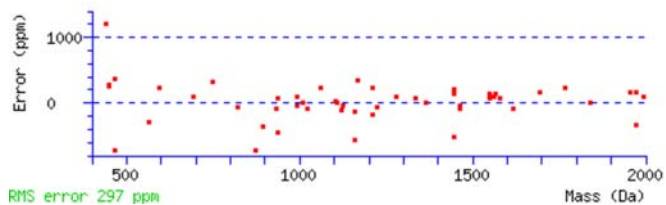

NCBI BLAST search of [LHGGTPANFLDVGGGATAQQVTEAFK](#)  
 (Parameters: blastp, nr protein database, expect=20000, no filter, PAM30)  
 Other BLAST [web gateways](#)

**All matches to this query**

| Score | Mr(calc): | Delta   | Sequence                                   |
|-------|-----------|---------|--------------------------------------------|
| 48.2  | 2585.2874 | 1.0153  | <a href="#">LHGGTPANFLDVGGGATAQQVTEAFK</a> |
| 5.0   | 2588.3268 | -2.0241 | <a href="#">EVNSGTLQTCLPPTPPNSQKVPPK</a>   |
| 0.4   | 2588.3755 | -2.0728 | <a href="#">MIKDVLLCLCLFVAPIWCAPVK</a>     |
| 0.4   | 2588.3755 | -2.0728 | <a href="#">MIKDVLLCLCLFVAPIWCAPVK</a>     |

Mascot: <http://www.matrixscience.com/>

**Peptide View**

MS/MS Fragmentation of **LITVGEVNVHDPVVGDR**

Found in [gi136256027|ref|NP\\_997974.2](#), phosphorylase, glycogen; brain [Danio rerio]

Match to Query 41754: 1906.992724 from(954.503638,2+) index(115408)

Data file TCDD\_0530.dta

Click mouse within plot area to zoom in by factor of two about that point

Or, Plot from  to  Da

Label all possible matches  Label matches used for scoring

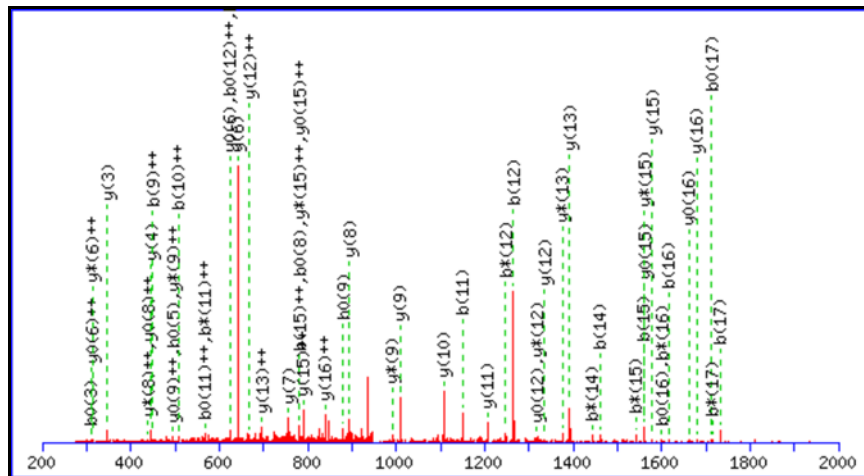

Monoisotopic mass of neutral peptide Mr(calc): 1904.9956

Ions Score: 57 Expect: 0.00049

Matches : 56/180 fragment ions using 95 most intense peaks ([help](#))

| #  | b         | b <sup>++</sup> | b <sup>*</sup> | b <sup>*++</sup> | b <sup>0</sup> | b <sup>0++</sup> | Seq. | y         | y <sup>++</sup> | y <sup>*</sup> | y <sup>*++</sup> | y <sup>0</sup> | y <sup>0++</sup> | #  |
|----|-----------|-----------------|----------------|------------------|----------------|------------------|------|-----------|-----------------|----------------|------------------|----------------|------------------|----|
| 1  | 114.0913  | 57.5493         |                |                  |                |                  | L    |           |                 |                |                  |                |                  | 18 |
| 2  | 227.1754  | 114.0913        |                |                  |                |                  | I    | 1792.9188 | 896.9630        | 1775.8923      | 888.4498         | 1774.9082      | 887.9578         | 17 |
| 3  | 328.2231  | 164.6152        |                |                  | 310.2125       | 155.6099         | T    | 1679.8347 | 840.4210        | 1662.8082      | 831.9077         | 1661.8242      | 831.4157         | 16 |
| 4  | 415.2551  | 208.1312        |                |                  | 397.2445       | 199.1259         | S    | 1578.7871 | 789.8972        | 1561.7605      | 781.3839         | 1560.7765      | 780.8919         | 15 |
| 5  | 514.3235  | 257.6654        |                |                  | 496.3130       | 248.6601         | V    | 1491.7550 | 746.3812        | 1474.7285      | 737.8679         | 1473.7445      | 737.3759         | 14 |
| 6  | 571.3450  | 286.1761        |                |                  | 553.3344       | 277.1709         | G    | 1392.6866 | 696.8469        | 1375.6601      | 688.3337         | 1374.6761      | 687.8417         | 13 |
| 7  | 700.3876  | 350.6974        |                |                  | 682.3770       | 341.6921         | E    | 1335.6652 | 668.3362        | 1318.6386      | 659.8229         | 1317.6546      | 659.3309         | 12 |
| 8  | 799.4560  | 400.2316        |                |                  | 781.4454       | 391.2264         | V    | 1206.6226 | 603.8149        | 1189.5960      | 595.3016         | 1188.6120      | 594.8096         | 11 |
| 9  | 898.5244  | 449.7658        |                |                  | 880.5138       | 440.7606         | V    | 1107.5541 | 554.2807        | 1090.5276      | 545.7674         | 1089.5436      | 545.2754         | 10 |
| 10 | 1012.5673 | 506.7873        | 995.5408       | 498.2740         | 994.5568       | 497.7820         | N    | 1008.4857 | 504.7465        | 991.4592       | 496.2332         | 990.4752       | 495.7412         | 9  |
| 11 | 1149.6262 | 575.3168        | 1132.5997      | 566.8035         | 1131.6157      | 566.3115         | H    | 894.4428  | 447.7250        | 877.4163       | 439.2118         | 876.4322       | 438.7198         | 8  |
| 12 | 1264.6532 | 632.8302        | 1247.6266      | 624.3170         | 1246.6426      | 623.8250         | D    | 757.3839  | 379.1956        | 740.3573       | 370.6823         | 739.3733       | 370.1903         | 7  |
| 13 | 1361.7060 | 681.3566        | 1344.6794      | 672.8433         | 1343.6954      | 672.3513         | P    | 642.3570  | 321.6821        | 625.3304       | 313.1688         | 624.3464       | 312.6768         | 6  |
| 14 | 1460.7744 | 730.8908        | 1443.7478      | 722.3775         | 1442.7638      | 721.8855         | V    | 545.3042  | 273.1557        | 528.2776       | 264.6425         | 527.2936       | 264.1504         | 5  |
| 15 | 1559.8428 | 780.4250        | 1542.8162      | 771.9118         | 1541.8322      | 771.4197         | V    | 446.2358  | 223.6215        | 429.2092       | 215.1083         | 428.2252       | 214.6162         | 4  |
| 16 | 1616.8642 | 808.9358        | 1599.8377      | 800.4225         | 1598.8537      | 799.9305         | G    | 347.1674  | 174.0873        | 330.1408       | 165.5740         | 329.1568       | 165.0820         | 3  |
| 17 | 1731.8912 | 866.4492        | 1714.8646      | 857.9360         | 1713.8806      | 857.4440         | D    | 290.1459  | 145.5766        | 273.1193       | 137.0633         | 272.1353       | 136.5713         | 2  |
| 18 |           |                 |                |                  |                |                  | R    | 175.1190  | 88.0631         | 158.0924       | 79.5498          |                |                  | 1  |

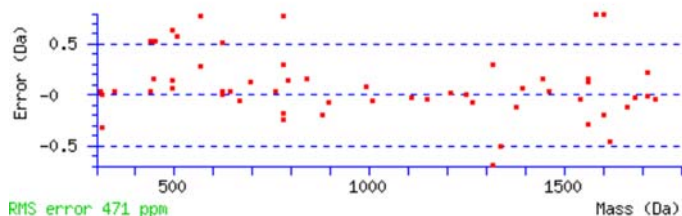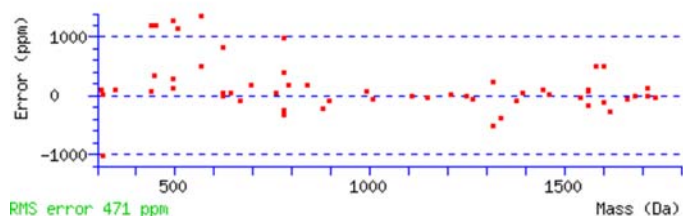

NCBI BLAST search of [LITSVGEVVNHDPVVGDR](#)  
 (Parameters: blastp, nr protein database, expect=20000, no filter, PAM30)  
 Other BLAST [web gateways](#)

**All matches to this query**

| Score | Mr(calc): | Delta  | Sequence                            |
|-------|-----------|--------|-------------------------------------|
| 56.6  | 1904.9956 | 1.9971 | <a href="#">LITSVGEVVNHDPVVGDR</a>  |
| 8.8   | 1904.7806 | 2.2121 | <a href="#">NSSPQENCADIDEGVGDR</a>  |
| 5.6   | 1904.9666 | 2.0261 | <a href="#">ELNVSVAGVTFQVPASCK</a>  |
| 2.4   | 1904.9129 | 2.0798 | <a href="#">EQQWEGHLQQPNGVK</a>     |
| 1.7   | 1904.9843 | 2.0084 | <a href="#">SADLLAATPDLSSAAALYR</a> |
| 1.6   | 1905.9560 | 1.0367 | <a href="#">HYQNVFVCTGPLYLPR</a>    |
| 1.4   | 1906.0007 | 0.9920 | <a href="#">SLQLTVDGESVKSTISSR</a>  |
| 1.0   | 1904.9374 | 2.0553 | <a href="#">TPSVTRVCSEAQATVSGR</a>  |
| 0.7   | 1906.0245 | 0.9682 | <a href="#">GAVGRGQANIKPDRPNTR</a>  |
| 0.4   | 1904.9891 | 2.0036 | <a href="#">QTSVLLQISPVSHCHTR</a>   |

Mascot: <http://www.matrixscience.com/>

# MASCOT SCIENCE Mascot Search Results

## Peptide View

MS/MS Fragmentation of **LQVAGEITTGPR**

Found in [gi|189532637|ref|XP\\_693717.3](#), PREDICTED: similar to Calcium-binding mitochondrial carrier protein Aralar2 (Mitochondrial aspartate glutamate carrier 2) (Solute carrier family 25 member 13) (Citrin) [Danio rerio]

Match to Query 14962: 1243.162724 from(622.588638,2+) index(7988)

Data file TCDD\_0530.dta

Click mouse within plot area to zoom in by factor of two about that point

Or, Plot from  to  Da

Label all possible matches  Label matches used for scoring

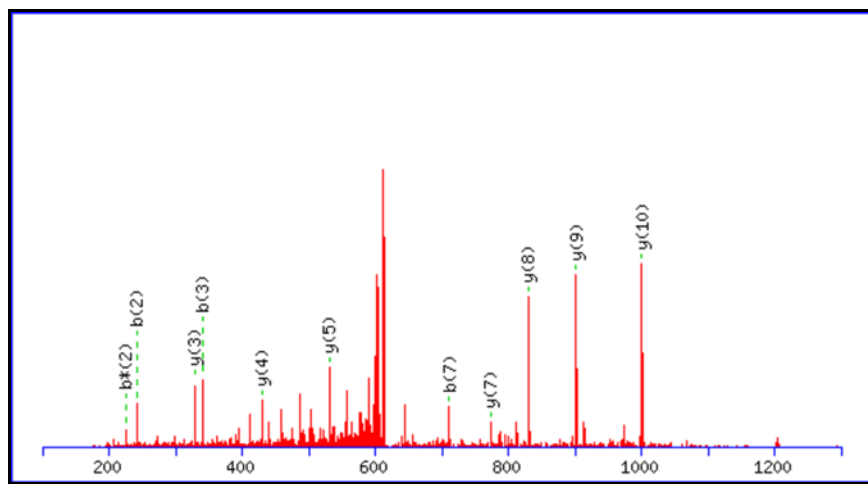

Monoisotopic mass of neutral peptide  $M_r(\text{calc})$ : 1240.6776

Ions Score: 45 Expect: 0.01

Matches : 11/114 fragment ions using 22 most intense peaks ([help](#))

| #  | b               | b <sup>++</sup> | b <sup>*</sup>  | b <sup>*++</sup> | b <sup>0</sup> | b <sup>0++</sup> | Seq. | y                | y <sup>++</sup> | y <sup>*</sup> | y <sup>*++</sup> | y <sup>0</sup> | y <sup>0++</sup> | #  |
|----|-----------------|-----------------|-----------------|------------------|----------------|------------------|------|------------------|-----------------|----------------|------------------|----------------|------------------|----|
| 1  | 114.0913        | 57.5493         |                 |                  |                |                  | L    |                  |                 |                |                  |                |                  | 12 |
| 2  | <b>242.1499</b> | 121.5786        | <b>225.1234</b> | 113.0653         |                |                  | Q    | 1128.6008        | 564.8040        | 1111.5742      | 556.2907         | 1110.5902      | 555.7987         | 11 |
| 3  | <b>341.2183</b> | 171.1128        | 324.1918        | 162.5995         |                |                  | V    | <b>1000.5422</b> | 500.7747        | 983.5156       | 492.2615         | 982.5316       | 491.7694         | 10 |
| 4  | 412.2554        | 206.6314        | 395.2289        | 198.1181         |                |                  | A    | <b>901.4738</b>  | 451.2405        | 884.4472       | 442.7273         | 883.4632       | 442.2352         | 9  |
| 5  | 469.2769        | 235.1421        | 452.2504        | 226.6288         |                |                  | G    | <b>830.4367</b>  | 415.7220        | 813.4101       | 407.2087         | 812.4261       | 406.7167         | 8  |
| 6  | 598.3195        | 299.6634        | 581.2930        | 291.1501         | 580.3089       | 290.6581         | E    | <b>773.4152</b>  | 387.2112        | 756.3886       | 378.6980         | 755.4046       | 378.2060         | 7  |
| 7  | <b>711.4036</b> | 356.2054        | 694.3770        | 347.6921         | 693.3930       | 347.2001         | I    | 644.3726         | 322.6899        | 627.3461       | 314.1767         | 626.3620       | 313.6847         | 6  |
| 8  | 812.4512        | 406.7293        | 795.4247        | 398.2160         | 794.4407       | 397.7240         | T    | <b>531.2885</b>  | 266.1479        | 514.2620       | 257.6346         | 513.2780       | 257.1426         | 5  |
| 9  | 913.4989        | 457.2531        | 896.4724        | 448.7398         | 895.4884       | 448.2478         | T    | <b>430.2409</b>  | 215.6241        | 413.2143       | 207.1108         | 412.2303       | 206.6188         | 4  |
| 10 | 970.5204        | 485.7638        | 953.4938        | 477.2506         | 952.5098       | 476.7586         | G    | <b>329.1932</b>  | 165.1002        | 312.1666       | 156.5870         |                |                  | 3  |
| 11 | 1067.5732       | 534.2902        | 1050.5466       | 525.7769         | 1049.5626      | 525.2849         | P    | 272.1717         | 136.5895        | 255.1452       | 128.0762         |                |                  | 2  |
| 12 |                 |                 |                 |                  |                |                  | R    | 175.1190         | 88.0631         | 158.0924       | 79.5498          |                |                  | 1  |

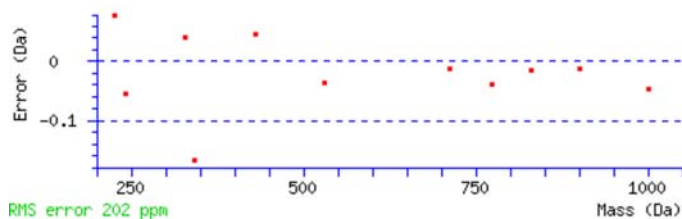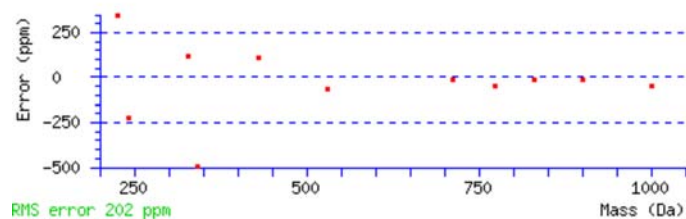

NCBI BLAST search of [LQVAGEITTGPR](#)

(Parameters: blastp, nr protein database, expect=20000, no filter, PAM30)  
Other BLAST [web gateways](#)

**All matches to this query**

| Score | Mr(calc): | Delta   | Sequence                     |
|-------|-----------|---------|------------------------------|
| 45.2  | 1240.6776 | 2.4852  | <a href="#">LQVAGEITTGPR</a> |
| 13.5  | 1242.7183 | 0.4444  | <a href="#">TSQIGILLSSPK</a> |
| 12.9  | 1241.6000 | 1.5627  | <a href="#">EDPKSPGTAANR</a> |
| 12.8  | 1242.6503 | 0.5125  | <a href="#">QLGICEPATRR</a>  |
| 11.0  | 1243.6846 | -0.5219 | <a href="#">QISDLMSLIPK</a>  |
| 8.8   | 1243.6408 | -0.4781 | <a href="#">KEAQASSEPAVK</a> |
| 8.5   | 1242.5952 | 0.5675  | <a href="#">QNSNPERSSPK</a>  |
| 8.2   | 1242.6318 | 0.5309  | <a href="#">IELGPMFDPK</a>   |
| 6.8   | 1241.6728 | 1.4899  | <a href="#">VLEQQITNAAR</a>  |
| 6.5   | 1241.5313 | 1.6314  | <a href="#">EDPAFSGGYSGR</a> |

**Mascot:** <http://www.matrixscience.com/>

**MATRIX SCIENCE Mascot Search Results**

**Peptide View**

MS/MS Fragmentation of **NELHNLLDKPQLQGIPVLVLGNK**  
 Found in [gi|45387563|ref|NP\\_991129.1](#), ADP-ribosylation factor-like 8Ba [Danio rerio]

Match to Query 94575: 2551.832724 from(1276.923638,2+) index(130318)  
 Data file TCDD\_0530.dta

Click mouse within plot area to zoom in by factor of two about that point

Or, Plot from  to  Da   
 Label all possible matches  Label matches used for scoring

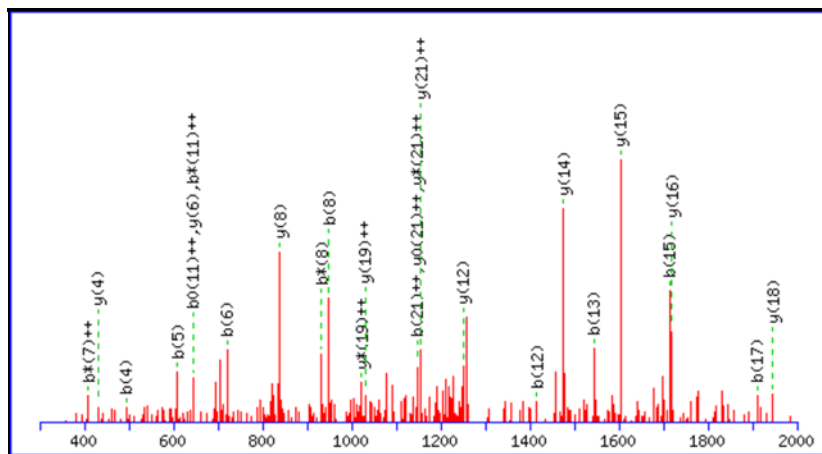

Monoisotopic mass of neutral peptide Mr(calc): 2551.4486  
 Ions Score: 61 Expect: 0.00012  
 Matches : 26/232 fragment ions using 33 most intense peaks ([help](#))

| #  | b                | b <sup>++</sup>  | b*              | b* <sup>++</sup> | b <sup>0</sup> | b <sup>0</sup> <sup>++</sup> | Seq. | y                | y <sup>++</sup>  | y*        | y* <sup>++</sup> | y <sup>0</sup> | y <sup>0</sup> <sup>++</sup> | #  |
|----|------------------|------------------|-----------------|------------------|----------------|------------------------------|------|------------------|------------------|-----------|------------------|----------------|------------------------------|----|
| 1  | 115.0502         | 58.0287          | 98.0237         | 49.5155          |                |                              | N    |                  |                  |           |                  |                |                              | 23 |
| 2  | 244.0928         | 122.5500         | 227.0662        | 114.0368         | 226.0822       | 113.5448                     | E    | 2438.4130        | 1219.7101        | 2421.3864 | 1211.1968        | 2420.4024      | 1210.7048                    | 22 |
| 3  | 357.1769         | 179.0921         | 340.1503        | 170.5788         | 339.1663       | 170.0868                     | L    | 2309.3704        | <b>1155.1888</b> | 2292.3438 | <b>1146.6755</b> | 2291.3598      | <b>1146.1835</b>             | 21 |
| 4  | <b>494.2358</b>  | 247.6215         | 477.2092        | 239.1082         | 476.2252       | 238.6162                     | H    | 2196.2863        | 1098.6468        | 2179.2598 | 1090.1335        | 2178.2757      | 1089.6415                    | 20 |
| 5  | <b>608.2787</b>  | 304.6430         | 591.2522        | 296.1297         | 590.2681       | 295.6377                     | N    | 2059.2274        | <b>1030.1173</b> | 2042.2008 | <b>1021.6041</b> | 2041.2168      | 1021.1120                    | 19 |
| 6  | <b>721.3628</b>  | 361.1850         | 704.3362        | 352.6717         | 703.3522       | 352.1797                     | L    | <b>1945.1845</b> | 973.0959         | 1928.1579 | 964.5826         | 1927.1739      | 964.0906                     | 18 |
| 7  | 834.4468         | 417.7271         | 817.4203        | <b>409.2138</b>  | 816.4363       | 408.7218                     | L    | 1832.1004        | 916.5538         | 1815.0738 | 908.0406         | 1814.0898      | 907.5486                     | 17 |
| 8  | <b>949.4738</b>  | 475.2405         | <b>932.4472</b> | 466.7272         | 931.4632       | 466.2352                     | D    | <b>1719.0163</b> | 860.0118         | 1701.9898 | 851.4985         | 1701.0058      | 851.0065                     | 16 |
| 9  | 1077.5687        | 539.2880         | 1060.5422       | 530.7747         | 1059.5582      | 530.2827                     | K    | <b>1603.9894</b> | 802.4983         | 1586.9628 | 793.9851         |                |                              | 15 |
| 10 | 1174.6215        | 587.8144         | 1157.5949       | 579.3011         | 1156.6109      | 578.8091                     | P    | <b>1475.8944</b> | 738.4509         | 1458.8679 | 729.9376         |                |                              | 14 |
| 11 | 1302.6801        | 651.8437         | 1285.6535       | <b>643.3304</b>  | 1284.6695      | <b>642.8384</b>              | Q    | 1378.8417        | 689.9245         | 1361.8151 | 681.4112         |                |                              | 13 |
| 12 | <b>1415.7641</b> | 708.3857         | 1398.7376       | 699.8724         | 1397.7536      | 699.3804                     | L    | <b>1250.7831</b> | 625.8952         | 1233.7565 | 617.3819         |                |                              | 12 |
| 13 | <b>1543.8227</b> | 772.4150         | 1526.7962       | 763.9017         | 1525.8122      | 763.4097                     | Q    | 1137.6990        | 569.3531         | 1120.6725 | 560.8399         |                |                              | 11 |
| 14 | 1600.8442        | 800.9257         | 1583.8176       | 792.4125         | 1582.8336      | 791.9204                     | G    | 1009.6404        | 505.3239         | 992.6139  | 496.8106         |                |                              | 10 |
| 15 | <b>1713.9282</b> | 857.4678         | 1696.9017       | 848.9545         | 1695.9177      | 848.4625                     | I    | 952.6190         | 476.8131         | 935.5924  | 468.2999         |                |                              | 9  |
| 16 | 1810.9810        | 905.9941         | 1793.9545       | 897.4809         | 1792.9704      | 896.9889                     | P    | <b>839.5349</b>  | 420.2711         | 822.5084  | 411.7578         |                |                              | 8  |
| 17 | <b>1910.0494</b> | 955.5283         | 1893.0229       | 947.0151         | 1892.0389      | 946.5231                     | V    | 742.4822         | 371.7447         | 725.4556  | 363.2314         |                |                              | 7  |
| 18 | 2023.1335        | 1012.0704        | 2006.1069       | 1003.5571        | 2005.1229      | 1003.0651                    | L    | <b>643.4137</b>  | 322.2105         | 626.3872  | 313.6972         |                |                              | 6  |
| 19 | 2122.2019        | 1061.6046        | 2105.1754       | 1053.0913        | 2104.1913      | 1052.5993                    | V    | 530.3297         | 265.6685         | 513.3031  | 257.1552         |                |                              | 5  |
| 20 | 2235.2860        | 1118.1466        | 2218.2594       | 1109.6333        | 2217.2754      | 1109.1413                    | L    | <b>431.2613</b>  | 216.1343         | 414.2347  | 207.6210         |                |                              | 4  |
| 21 | 2292.3074        | <b>1146.6574</b> | 2275.2809       | 1138.1441        | 2274.2969      | 1137.6521                    | G    | 318.1772         | 159.5922         | 301.1506  | 151.0790         |                |                              | 3  |
| 22 | 2406.3504        | 1203.6788        | 2389.3238       | 1195.1655        | 2388.3398      | 1194.6735                    | N    | 261.1557         | 131.0815         | 244.1292  | 122.5682         |                |                              | 2  |
| 23 |                  |                  |                 |                  |                |                              | K    | 147.1128         | 74.0600          | 130.0863  | 65.5468          |                |                              | 1  |



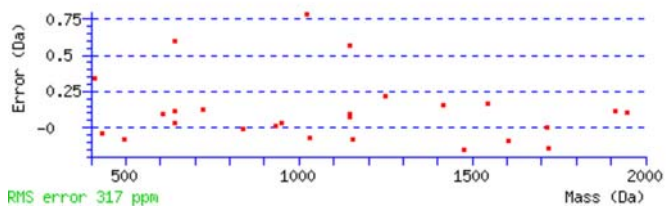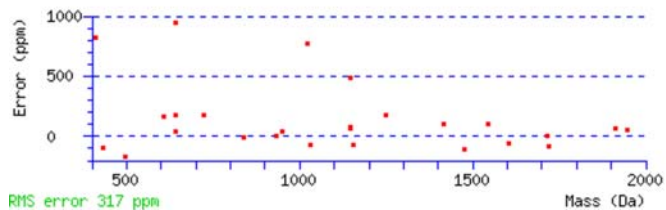

NCBI BLAST search of [NELHNLLDKPQLQGIPVLVLGNK](#)

(Parameters: blastp, nr protein database, expect=20000, no filter, PAM30)

Other BLAST [web gateways](#)

**All matches to this query**

| Score | Mr(calc): | Delta   | Sequence                                |
|-------|-----------|---------|-----------------------------------------|
| 61.2  | 2551.4486 | 0.3841  | <a href="#">NELHNLLDKPQLQGIPVLVLGNK</a> |
| 8.5   | 2552.2693 | -0.4366 | <a href="#">RWTLIQNSCLDNTVTIFENAK</a>   |
| 2.5   | 2553.2798 | -1.4471 | <a href="#">KVHNLEPIHMFLSGASAPYSEAR</a> |
| 2.4   | 2553.0579 | -1.2252 | <a href="#">QCWSCKTTCFLSAVTCSCSPER</a>  |
| 2.2   | 2552.2071 | -0.3744 | <a href="#">ELEAYGDGPPSDPAERLSFFIDK</a> |
| 1.1   | 2554.1461 | -2.3134 | <a href="#">ADYFLLDESGSISYPDFEDMK</a>   |
| 0.5   | 2551.0600 | 0.7727  | <a href="#">CIDDCITGNPSFTCSCLAGFTGR</a> |
| 0.5   | 2551.0600 | 0.7727  | <a href="#">CIDDCITGNPSFTCSCLAGFTGR</a> |

**Mascot:** <http://www.matrixscience.com/>

**MATRIX SCIENCE** Mascot Search Results

**Peptide View**

MS/MS Fragmentation of **NIHGSVDSANTEISLWFKPEELVSFK**

Found in [gi|18859107|ref|NP\\_571001.1](#), non-metastatic cells 2, protein (NM23B) expressed in [Danio rerio]

Match to Query 122002: 3263.402724 from(1088.808184,3+) index(149211)

Data file TCDD\_0530.dta

Click mouse within plot area to zoom in by factor of two about that point

Or, Plot from  to  Da

Label all possible matches  Label matches used for scoring

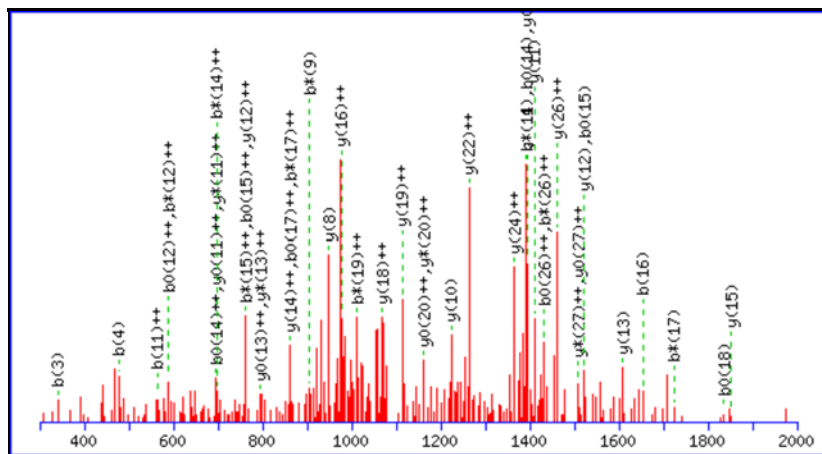

Monoisotopic mass of neutral peptide Mr(calc): 3261.6194

Ions Score: 49 Expect: 0.0013

Matches : 45/322 fragment ions using 49 most intense peaks ([help](#))

| #  | b                | b <sup>++</sup> | b*               | b <sup>*++</sup> | b <sup>0</sup>   | b <sup>0++</sup> | Seq. | y                | y <sup>++</sup>  | y*               | y <sup>*++</sup> | y <sup>0</sup> | y <sup>0++</sup> | #  |
|----|------------------|-----------------|------------------|------------------|------------------|------------------|------|------------------|------------------|------------------|------------------|----------------|------------------|----|
| 1  | 115.0502         | 58.0287         | 98.0237          | 49.5155          |                  |                  | N    |                  |                  |                  |                  |                |                  | 29 |
| 2  | 228.1343         | 114.5708        | 211.1077         | 106.0575         |                  |                  | I    | 3148.5837        | 1574.7955        | 3131.5572        | 1566.2822        | 3130.5732      | 1565.7902        | 28 |
| 3  | <b>341.2183</b>  | 171.1128        | 324.1918         | 162.5995         |                  |                  | I    | 3035.4997        | 1518.2535        | 3018.4731        | <b>1509.7402</b> | 3017.4891      | <b>1509.2482</b> | 27 |
| 4  | <b>478.2772</b>  | 239.6423        | 461.2507         | 231.1290         |                  |                  | H    | 2922.4156        | <b>1461.7114</b> | 2905.3890        | 1453.1982        | 2904.4050      | 1452.7062        | 26 |
| 5  | 535.2987         | 268.1530        | 518.2722         | 259.6397         |                  |                  | G    | 2785.3567        | <b>1393.1820</b> | 2768.3301        | 1384.6687        | 2767.3461      | 1384.1767        | 25 |
| 6  | 622.3307         | 311.6690        | 605.3042         | 303.1557         | 604.3202         | 302.6637         | S    | 2728.3352        | <b>1364.6712</b> | 2711.3087        | 1356.1580        | 2710.3247      | 1355.6660        | 24 |
| 7  | 737.3577         | 369.1825        | 720.3311         | 360.6692         | 719.3471         | 360.1772         | D    | 2641.3032        | 1321.1552        | 2624.2766        | 1312.6420        | 2623.2926      | 1312.1499        | 23 |
| 8  | 824.3897         | 412.6985        | 807.3632         | 404.1852         | 806.3791         | 403.6932         | S    | 2526.2762        | <b>1263.6418</b> | 2509.2497        | 1255.1285        | 2508.2657      | 1254.6365        | 22 |
| 9  | 923.4581         | 462.2327        | <b>906.4316</b>  | 453.7194         | 905.4476         | 453.2274         | V    | 2439.2442        | 1220.1257        | 2422.2177        | 1211.6125        | 2421.2337      | 1211.1205        | 21 |
| 10 | 1038.4851        | 519.7462        | 1021.4585        | 511.2329         | 1020.4745        | 510.7409         | D    | 2340.1758        | 1170.5915        | 2323.1493        | <b>1162.0783</b> | 2322.1652      | <b>1161.5863</b> | 20 |
| 11 | 1125.5171        | <b>563.2622</b> | 1108.4905        | 554.7489         | 1107.5065        | 554.2569         | S    | 2225.1489        | <b>1113.0781</b> | 2208.1223        | 1104.5648        | 2207.1383      | 1104.0728        | 19 |
| 12 | 1196.5542        | 598.7807        | 1179.5277        | <b>590.2675</b>  | 1178.5436        | <b>589.7755</b>  | A    | 2138.1168        | <b>1069.5621</b> | 2121.0903        | 1061.0488        | 2120.1063      | 1060.5568        | 18 |
| 13 | 1310.5971        | 655.8022        | 1293.5706        | 647.2889         | 1292.5866        | 646.7969         | N    | 2067.0797        | 1034.0435        | 2050.0532        | 1025.5302        | 2049.0692      | 1025.0382        | 17 |
| 14 | 1411.6448        | 706.3260        | <b>1394.6183</b> | <b>697.8128</b>  | <b>1393.6342</b> | <b>697.3208</b>  | T    | 1953.0368        | <b>977.0220</b>  | 1936.0102        | 968.5088         | 1935.0262      | 968.0168         | 16 |
| 15 | 1540.6874        | 770.8473        | 1523.6609        | <b>762.3341</b>  | <b>1522.6768</b> | <b>761.8421</b>  | E    | <b>1851.9891</b> | 926.4982         | 1834.9626        | 917.9849         | 1833.9785      | 917.4929         | 15 |
| 16 | <b>1653.7715</b> | 827.3894        | 1636.7449        | 818.8761         | 1635.7609        | 818.3841         | I    | 1722.9465        | <b>861.9769</b>  | 1705.9200        | 853.4636         | 1704.9360      | 852.9716         | 14 |
| 17 | 1740.8035        | 870.9054        | <b>1723.7769</b> | <b>862.3921</b>  | 1722.7929        | <b>861.9001</b>  | S    | <b>1609.8625</b> | 805.4349         | 1592.8359        | <b>796.9216</b>  | 1591.8519      | <b>796.4296</b>  | 13 |
| 18 | 1853.8876        | 927.4474        | 1836.8610        | 918.9341         | <b>1835.8770</b> | 918.4421         | L    | <b>1522.8304</b> | <b>761.9189</b>  | 1505.8039        | 753.4056         | 1504.8199      | 752.9136         | 12 |
| 19 | 2039.9669        | 1020.4871       | 2022.9403        | <b>1011.9738</b> | 2021.9563        | 1011.4818        | W    | <b>1409.7464</b> | 705.3768         | <b>1392.7198</b> | <b>696.8635</b>  | 1391.7358      | <b>696.3715</b>  | 11 |
| 20 | 2187.0353        | 1094.0213       | 2170.0087        | 1085.5080        | 2169.0247        | 1085.0160        | F    | <b>1223.6671</b> | 612.3372         | 1206.6405        | 603.8239         | 1205.6565      | 603.3319         | 10 |
| 21 | 2315.1302        | 1158.0688       | 2298.1037        | 1149.5555        | 2297.1197        | 1149.0635        | K    | 1076.5986        | 538.8030         | 1059.5721        | 530.2897         | 1058.5881      | 529.7977         | 9  |
| 22 | 2412.1830        | 1206.5951       | 2395.1565        | 1198.0819        | 2394.1724        | 1197.5899        | P    | <b>948.5037</b>  | 474.7555         | 931.4771         | 466.2422         | 930.4931       | 465.7502         | 8  |
| 23 | 2541.2256        | 1271.1164       | 2524.1991        | 1262.6032        | 2523.2150        | 1262.1112        | E    | 851.4509         | 426.2291         | 834.4244         | 417.7158         | 833.4403       | 417.2238         | 7  |
| 24 | 2670.2682        | 1335.6377       | 2653.2417        | 1327.1245        | 2652.2576        | 1326.6325        | E    | 722.4083         | 361.7078         | 705.3818         | 353.1945         | 704.3978       | 352.7025         | 6  |

|    |           |           |           |           |           |           |   |          |          |          |          |          |          |   |
|----|-----------|-----------|-----------|-----------|-----------|-----------|---|----------|----------|----------|----------|----------|----------|---|
| 25 | 2783.3523 | 1392.1798 | 2766.3257 | 1383.6665 | 2765.3417 | 1383.1745 | L | 593.3657 | 297.1865 | 576.3392 | 288.6732 | 575.3552 | 288.1812 | 5 |
| 26 | 2882.4207 | 1441.7140 | 2865.3941 | 1433.2007 | 2864.4101 | 1432.7087 | V | 480.2817 | 240.6445 | 463.2551 | 232.1312 | 462.2711 | 231.6392 | 4 |
| 27 | 2969.4527 | 1485.2300 | 2952.4262 | 1476.7167 | 2951.4421 | 1476.2247 | S | 381.2132 | 191.1103 | 364.1867 | 182.5970 | 363.2027 | 182.1050 | 3 |
| 28 | 3116.5211 | 1558.7642 | 3099.4946 | 1550.2509 | 3098.5106 | 1549.7589 | F | 294.1812 | 147.5942 | 277.1547 | 139.0810 |          |          | 2 |
| 29 |           |           |           |           |           |           | K | 147.1128 | 74.0600  | 130.0863 | 65.5468  |          |          | 1 |

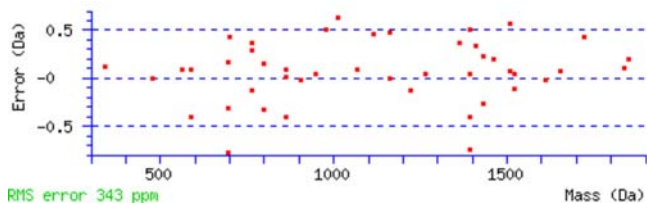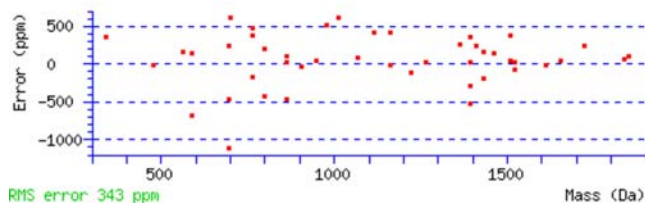

NCBI **BLAST** search of [NIIHGSDSVDSANTEISLWFKPEELVSFK](#)  
 (Parameters: blastp, nr protein database, expect=20000, no filter, PAM30)

Other BLAST [web gateways](#)

#### All matches to this query

| Score | Mr(calc): | Delta   | Sequence                                          |
|-------|-----------|---------|---------------------------------------------------|
| 49.2  | 3261.6194 | 1.7834  | <a href="#">NIIHGSDSVDSANTEISLWFKPEELVSFK</a>     |
| 4.2   | 3264.4018 | -0.9991 | <a href="#">YHVLGEMFVTEDECAQSCECTKTGAVCQAK</a>    |
| 3.5   | 3264.4018 | -0.9991 | <a href="#">YHVLGEMFVTEDECAQSCECTKTGAVCQAK</a>    |
| 3.3   | 3263.5153 | -0.1126 | <a href="#">GYNSNANKNTLETVQYGVGEGSTAFLECQAR</a>   |
| 1.6   | 3261.3925 | 2.0102  | <a href="#">SCLDSSSDANPKPNHVVMEETDDLEEEK</a>      |
| 0.3   | 3265.5885 | -2.1858 | <a href="#">HHGLIVETEGSHSSDSSTVSSALQMLQSLTK</a>   |
| 0.0   | 3261.6034 | 1.7993  | <a href="#">SIPLVPELSLQNSQTSSAGDLSTEMSSAASVR</a>  |
| 0.0   | 3261.5646 | 1.8382  | <a href="#">SSNSIPPSPLACNPSSQPLSPQCSPLSLTGPPK</a> |

Mascot: <http://www.matrixscience.com/>

**MASCOT** SCIENCE } Mascot Search Results

**Peptide View**

MS/MS Fragmentation of **NPALQNSEPENQAVEAEAAEN**

Found in [gi|150378483|ref|NP\\_001092897.1](#), heat shock protein, alpha-crystallin-related, b11 [Danio rerio]

Match to Query 67886: 2224.312724 from(1113.163638,2+) index(8053)

Data file TCDD\_0530.dta

Click mouse within plot area to zoom in by factor of two about that point

Or, Plot from  to  Da

Label all possible matches  Label matches used for scoring

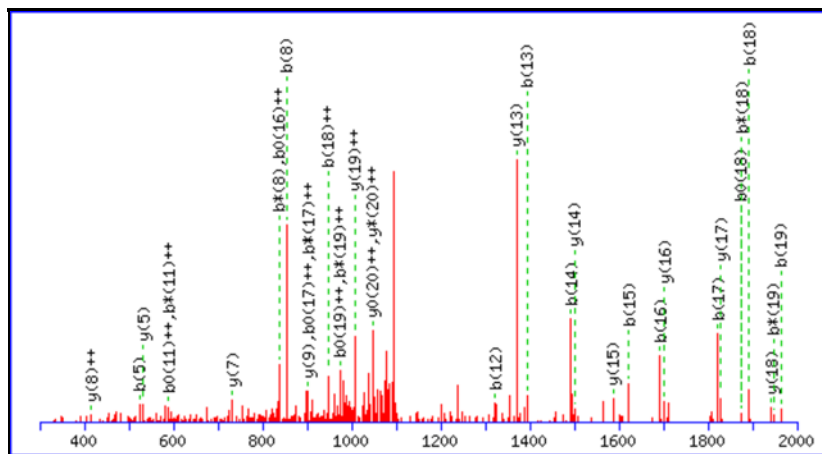

Monoisotopic mass of neutral peptide Mr(calc): 2223.9879

Ions Score: 64 Expect: 7e-005

Matches : 36/226 fragment ions using 51 most intense peaks ([help](#))

| #  | b         | b <sup>++</sup> | b <sup>*</sup> | b <sup>*++</sup> | b <sup>0</sup> | b <sup>0++</sup> | Seq. | y         | y <sup>++</sup> | y <sup>*</sup> | y <sup>*++</sup> | y <sup>0</sup> | y <sup>0++</sup> | #  |
|----|-----------|-----------------|----------------|------------------|----------------|------------------|------|-----------|-----------------|----------------|------------------|----------------|------------------|----|
| 1  | 115.0502  | 58.0287         | 98.0237        | 49.5155          |                |                  | N    |           |                 |                |                  |                |                  | 21 |
| 2  | 212.1030  | 106.5551        | 195.0764       | 98.0418          |                |                  | P    | 2110.9523 | 1055.9798       | 2093.9258      | 1047.4665        | 2092.9418      | 1046.9745        | 20 |
| 3  | 283.1401  | 142.0737        | 266.1135       | 133.5604         |                |                  | A    | 2013.8996 | 1007.4534       | 1996.8730      | 998.9402         | 1995.8890      | 998.4481         | 19 |
| 4  | 396.2241  | 198.6157        | 379.1976       | 190.1024         |                |                  | L    | 1942.8625 | 971.9349        | 1925.8359      | 963.4216         | 1924.8519      | 962.9296         | 18 |
| 5  | 524.2827  | 262.6450        | 507.2562       | 254.1317         |                |                  | Q    | 1829.7784 | 915.3928        | 1812.7519      | 906.8796         | 1811.7678      | 906.3876         | 17 |
| 6  | 638.3257  | 319.6665        | 621.2991       | 311.1532         |                |                  | N    | 1701.7198 | 851.3636        | 1684.6933      | 842.8503         | 1683.7093      | 842.3583         | 16 |
| 7  | 725.3577  | 363.1825        | 708.3311       | 354.6692         | 707.3471       | 354.1772         | S    | 1587.6769 | 794.3421        | 1570.6504      | 785.8288         | 1569.6663      | 785.3368         | 15 |
| 8  | 854.4003  | 427.7038        | 837.3737       | 419.1905         | 836.3897       | 418.6985         | E    | 1500.6449 | 750.8261        | 1483.6183      | 742.3128         | 1482.6343      | 741.8208         | 14 |
| 9  | 951.4530  | 476.2302        | 934.4265       | 467.7169         | 933.4425       | 467.2249         | P    | 1371.6023 | 686.3048        | 1354.5757      | 677.7915         | 1353.5917      | 677.2995         | 13 |
| 10 | 1080.4956 | 540.7515        | 1063.4691      | 532.2382         | 1062.4851      | 531.7462         | E    | 1274.5495 | 637.7784        | 1257.5230      | 629.2651         | 1256.5390      | 628.7731         | 12 |
| 11 | 1194.5386 | 597.7729        | 1177.5120      | 589.2596         | 1176.5280      | 588.7676         | N    | 1145.5069 | 573.2571        | 1128.4804      | 564.7438         | 1127.4964      | 564.2518         | 11 |
| 12 | 1322.5971 | 661.8022        | 1305.5706      | 653.2889         | 1304.5866      | 652.7969         | Q    | 1031.4640 | 516.2356        | 1014.4374      | 507.7224         | 1013.4534      | 507.2304         | 10 |
| 13 | 1393.6342 | 697.3208        | 1376.6077      | 688.8075         | 1375.6237      | 688.3155         | A    | 903.4054  | 452.2063        | 886.3789       | 443.6931         | 885.3949       | 443.2011         | 9  |
| 14 | 1492.7027 | 746.8550        | 1475.6761      | 738.3417         | 1474.6921      | 737.8497         | V    | 832.3683  | 416.6878        | 815.3418       | 408.1745         | 814.3577       | 407.6825         | 8  |
| 15 | 1621.7453 | 811.3763        | 1604.7187      | 802.8630         | 1603.7347      | 802.3710         | E    | 733.2999  | 367.1536        | 716.2733       | 358.6403         | 715.2893       | 358.1483         | 7  |
| 16 | 1692.7824 | 846.8948        | 1675.7558      | 838.3815         | 1674.7718      | 837.8895         | A    | 604.2573  | 302.6323        | 587.2307       | 294.1190         | 586.2467       | 293.6270         | 6  |
| 17 | 1821.8250 | 911.4161        | 1804.7984      | 902.9028         | 1803.8144      | 902.4108         | E    | 533.2202  | 267.1137        | 516.1936       | 258.6005         | 515.2096       | 258.1084         | 5  |
| 18 | 1892.8621 | 946.9347        | 1875.8355      | 938.4214         | 1874.8515      | 937.9294         | A    | 404.1776  | 202.5924        | 387.1510       | 194.0792         | 386.1670       | 193.5872         | 4  |
| 19 | 1963.8992 | 982.4532        | 1946.8726      | 973.9400         | 1945.8886      | 973.4479         | A    | 333.1405  | 167.0739        | 316.1139       | 158.5606         | 315.1299       | 158.0686         | 3  |
| 20 | 2092.9418 | 1046.9745       | 2075.9152      | 1038.4613        | 2074.9312      | 1037.9692        | E    | 262.1034  | 131.5553        | 245.0768       | 123.0420         | 244.0928       | 122.5500         | 2  |
| 21 |           |                 |                |                  |                |                  | N    | 133.0608  | 67.0340         | 116.0342       | 58.5207          |                |                  | 1  |

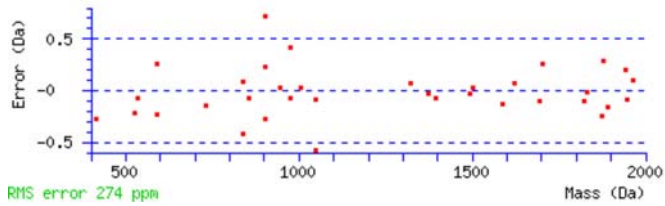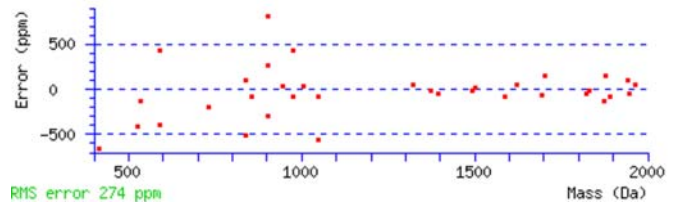

NCBI BLAST search of [NPALQNSEPENQAVEAEAAEN](#)

(Parameters: blastp, nr protein database, expect=20000, no filter, PAM30)

Other BLAST [web gateways](#)

**All matches to this query**

| Score | Mr(calc): | Delta  | Sequence                               |
|-------|-----------|--------|----------------------------------------|
| 64.4  | 2223.9879 | 0.3248 | <a href="#">NPALQNSEPENQAVEAEAAEN</a>  |
| 4.0   | 2223.9848 | 0.3279 | <a href="#">NTSDPQKTTINCPACGSSASSR</a> |
| 2.8   | 2224.0681 | 0.2446 | <a href="#">SVLQSEIDASSPLMYGTPSSR</a>  |
| 1.6   | 2222.1088 | 2.2039 | <a href="#">GIYSCPQCRQTFSPRALAK</a>    |
| 1.6   | 2222.1088 | 2.2039 | <a href="#">IYSCPQCRQSFTPRPALAK</a>    |
| 0.5   | 2224.0244 | 0.2883 | <a href="#">GPAFEVEDTEQDSSLTTRSR</a>   |
| 0.3   | 2224.1447 | 0.1680 | <a href="#">ANNPADLANLANITDEVVRSK</a>  |
| 0.1   | 2223.2296 | 1.0831 | <a href="#">MTASAAAELPHSKLLLSAVSVK</a> |

**Mascot:** <http://www.matrixscience.com/>

**MATRIX SCIENCE** Mascot Search Results

**Peptide View**

MS/MS Fragmentation of **NSPLPYPEASYPEEPYPDR**  
 Found in [gi|54400460|ref|NP\\_001005979.1](#), fibulin 5 [Danio rerio]

Match to Query 67464: 2220.842724 from(1111.428638,2+) index(8961)  
 Data file TCDD\_0530.dta

Click mouse within plot area to zoom in by factor of two about that point

Or, Plot from  to  Da

Label all possible matches  Label matches used for scoring

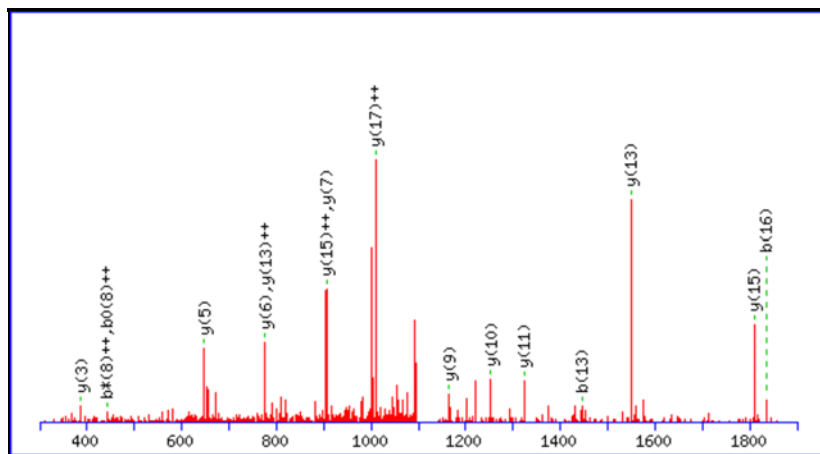

Monoisotopic mass of neutral peptide Mr(calc): 2220.0011  
 Ions Score: 74 Expect: 7.1e-006  
 Matches : 16/212 fragment ions using 16 most intense peaks ([help](#))

| #  | b         | b <sup>++</sup> | b*        | b <sup>*++</sup> | b <sup>0</sup> | b <sup>0++</sup> | Seq. | y         | y <sup>++</sup> | y*        | y <sup>*++</sup> | y <sup>0</sup> | y <sup>0++</sup> | #  |
|----|-----------|-----------------|-----------|------------------|----------------|------------------|------|-----------|-----------------|-----------|------------------|----------------|------------------|----|
| 1  | 115.0502  | 58.0287         | 98.0237   | 49.5155          |                |                  | N    |           |                 |           |                  |                |                  | 19 |
| 2  | 202.0822  | 101.5448        | 185.0557  | 93.0315          | 184.0717       | 92.5395          | S    | 2106.9655 | 1053.9864       | 2089.9389 | 1045.4731        | 2088.9549      | 1044.9811        | 18 |
| 3  | 299.1350  | 150.0711        | 282.1084  | 141.5579         | 281.1244       | 141.0659         | P    | 2019.9335 | 1010.4704       | 2002.9069 | 1001.9571        | 2001.9229      | 1001.4651        | 17 |
| 4  | 412.2191  | 206.6132        | 395.1925  | 198.0999         | 394.2085       | 197.6079         | L    | 1922.8807 | 961.9440        | 1905.8541 | 953.4307         | 1904.8701      | 952.9387         | 16 |
| 5  | 509.2718  | 255.1395        | 492.2453  | 246.6263         | 491.2613       | 246.1343         | P    | 1809.7966 | 905.4019        | 1792.7701 | 896.8887         | 1791.7861      | 896.3967         | 15 |
| 6  | 672.3352  | 336.6712        | 655.3086  | 328.1579         | 654.3246       | 327.6659         | Y    | 1712.7439 | 856.8756        | 1695.7173 | 848.3623         | 1694.7333      | 847.8703         | 14 |
| 7  | 769.3879  | 385.1976        | 752.3614  | 376.6843         | 751.3774       | 376.1923         | P    | 1549.6805 | 775.3439        | 1532.6540 | 766.8306         | 1531.6700      | 766.3386         | 13 |
| 8  | 898.4305  | 449.7189        | 881.4040  | 441.2056         | 880.4199       | 440.7136         | E    | 1452.6278 | 726.8175        | 1435.6012 | 718.3042         | 1434.6172      | 717.8122         | 12 |
| 9  | 969.4676  | 485.2374        | 952.4411  | 476.7242         | 951.4571       | 476.2322         | A    | 1323.5852 | 662.2962        | 1306.5586 | 653.7830         | 1305.5746      | 653.2909         | 11 |
| 10 | 1056.4997 | 528.7535        | 1039.4731 | 520.2402         | 1038.4891      | 519.7482         | S    | 1252.5481 | 626.7777        | 1235.5215 | 618.2644         | 1234.5375      | 617.7724         | 10 |
| 11 | 1219.5630 | 610.2851        | 1202.5364 | 601.7719         | 1201.5524      | 601.2798         | Y    | 1165.5160 | 583.2617        | 1148.4895 | 574.7484         | 1147.5055      | 574.2564         | 9  |
| 12 | 1316.6157 | 658.8115        | 1299.5892 | 650.2982         | 1298.6052      | 649.8062         | P    | 1002.4527 | 501.7300        | 985.4262  | 493.2167         | 984.4421       | 492.7247         | 8  |
| 13 | 1445.6583 | 723.3328        | 1428.6318 | 714.8195         | 1427.6478      | 714.3275         | E    | 905.3999  | 453.2036        | 888.3734  | 444.6903         | 887.3894       | 444.1983         | 7  |
| 14 | 1574.7009 | 787.8541        | 1557.6744 | 779.3408         | 1556.6904      | 778.8488         | E    | 776.3573  | 388.6823        | 759.3308  | 380.1690         | 758.3468       | 379.6770         | 6  |
| 15 | 1671.7537 | 836.3805        | 1654.7271 | 827.8672         | 1653.7431      | 827.3752         | P    | 647.3148  | 324.1610        | 630.2882  | 315.6477         | 629.3042       | 315.1557         | 5  |
| 16 | 1834.8170 | 917.9121        | 1817.7905 | 909.3989         | 1816.8065      | 908.9069         | Y    | 550.2620  | 275.6346        | 533.2354  | 267.1214         | 532.2514       | 266.6293         | 4  |
| 17 | 1931.8698 | 966.4385        | 1914.8432 | 957.9253         | 1913.8592      | 957.4332         | P    | 387.1987  | 194.1030        | 370.1721  | 185.5897         | 369.1881       | 185.0977         | 3  |
| 18 | 2046.8967 | 1023.9520       | 2029.8702 | 1015.4387        | 2028.8862      | 1014.9467        | D    | 290.1459  | 145.5766        | 273.1193  | 137.0633         | 272.1353       | 136.5713         | 2  |
| 19 |           |                 |           |                  |                |                  | R    | 175.1190  | 88.0631         | 158.0924  | 79.5498          |                |                  | 1  |

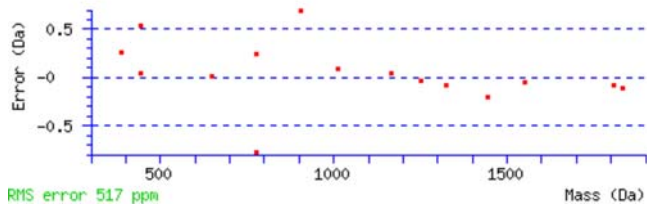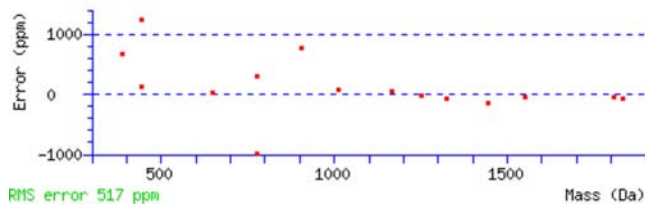

NCBI BLAST search of [NSPLPYPEASYPEEPYPDR](#)

(Parameters: blastp, nr protein database, expect=20000, no filter, PAM30)

Other BLAST [web gateways](#)

**All matches to this query**

| Score | Mr(calc): | Delta   | Sequence                               |
|-------|-----------|---------|----------------------------------------|
| 74.3  | 2220.0011 | 0.8416  | <a href="#">NSPLPYPEASYPEEPYPDR</a>    |
| 8.3   | 2222.0533 | -1.2106 | <a href="#">YSDCTCCKPHASEALAGK</a>     |
| 2.3   | 2221.0970 | -0.2543 | <a href="#">LVCGDEGKGAMAEVSTIVDTVK</a> |
| 1.3   | 2219.9762 | 0.8665  | <a href="#">KAMMDDAGQIFCHTPSTDPR</a>   |
| 0.7   | 2221.1201 | -0.2774 | <a href="#">SVDEEDRPFALGMQFVLLR</a>    |
| 0.5   | 2222.0777 | -1.2349 | <a href="#">QMTDTTAVLTGLDKYSSYK</a>    |
| 0.4   | 2221.0838 | -0.2410 | <a href="#">VEQGFTDKPYQQLPMVAR</a>     |
| 0.1   | 2223.1906 | -2.3479 | <a href="#">SAQQHRSVQLSAASLAVLCR</a>   |
| 0.1   | 2219.0793 | 1.7634  | <a href="#">SLQWGVASPIRCDDAFER</a>     |

**Mascot:** <http://www.matrixscience.com/>

**MATRIX SCIENCE** Mascot Search Results

**Peptide View**

MS/MS Fragmentation of **QLADALKANR**

Found in [gi|125832496|ref|XP\\_699375.2](#), PREDICTED: similar to mCG2694 [Danio rerio]

Match to Query 9074: 1100.252724 from(551.133638,2+) index(88961)

Data file TCDD\_0531.dta

Click mouse within plot area to zoom in by factor of two about that point

Or, Plot from  to  Da

Label all possible matches  Label matches used for scoring

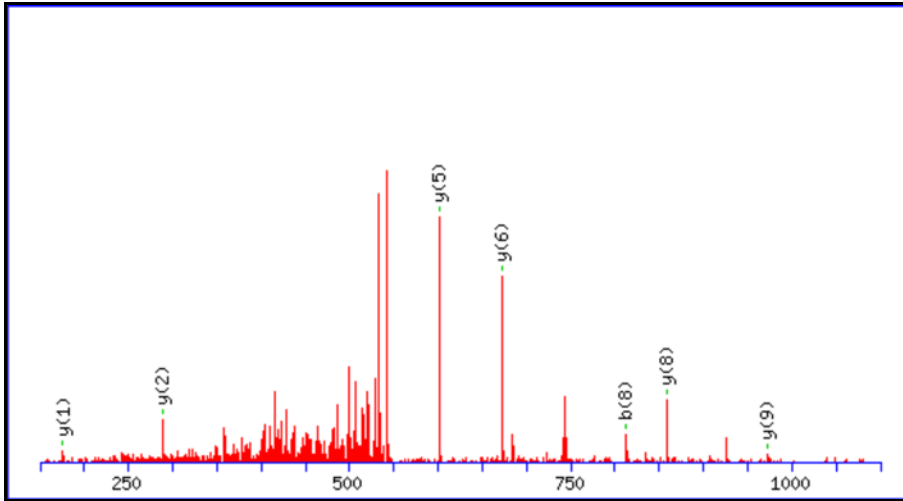

Monoisotopic mass of neutral peptide Mr(calc): 1098.6145

Ions Score: 46 Expect: 0.0083

Matches : 7/90 fragment ions using 10 most intense peaks ([help](#))

| #  | b        | b <sup>++</sup> | b*       | b <sup>*++</sup> | b <sup>0</sup> | b <sup>0++</sup> | Seq. | y        | y <sup>++</sup> | y*       | y <sup>*++</sup> | y <sup>0</sup> | y <sup>0++</sup> | #  |
|----|----------|-----------------|----------|------------------|----------------|------------------|------|----------|-----------------|----------|------------------|----------------|------------------|----|
| 1  | 129.0659 | 65.0366         | 112.0393 | 56.5233          |                |                  | Q    |          |                 |          |                  |                |                  | 10 |
| 2  | 242.1499 | 121.5786        | 225.1234 | 113.0653         |                |                  | L    | 971.5633 | 486.2853        | 954.5367 | 477.7720         | 953.5527       | 477.2800         | 9  |
| 3  | 313.1870 | 157.0972        | 296.1605 | 148.5839         |                |                  | A    | 858.4792 | 429.7432        | 841.4526 | 421.2300         | 840.4686       | 420.7380         | 8  |
| 4  | 428.2140 | 214.6106        | 411.1874 | 206.0974         | 410.2034       | 205.6053         | D    | 787.4421 | 394.2247        | 770.4155 | 385.7114         | 769.4315       | 385.2194         | 7  |
| 5  | 499.2511 | 250.1292        | 482.2245 | 241.6159         | 481.2405       | 241.1239         | A    | 672.4151 | 336.7112        | 655.3886 | 328.1979         |                |                  | 6  |
| 6  | 612.3352 | 306.6712        | 595.3086 | 298.1579         | 594.3246       | 297.6659         | L    | 601.3780 | 301.1926        | 584.3515 | 292.6794         |                |                  | 5  |
| 7  | 740.4301 | 370.7187        | 723.4036 | 362.2054         | 722.4196       | 361.7134         | K    | 488.2940 | 244.6506        | 471.2674 | 236.1373         |                |                  | 4  |
| 8  | 811.4672 | 406.2373        | 794.4407 | 397.7240         | 793.4567       | 397.2320         | A    | 360.1990 | 180.6031        | 343.1724 | 172.0899         |                |                  | 3  |
| 9  | 925.5102 | 463.2587        | 908.4836 | 454.7454         | 907.4996       | 454.2534         | N    | 289.1619 | 145.0846        | 272.1353 | 136.5713         |                |                  | 2  |
| 10 |          |                 |          |                  |                |                  | R    | 175.1190 | 88.0631         | 158.0924 | 79.5498          |                |                  | 1  |

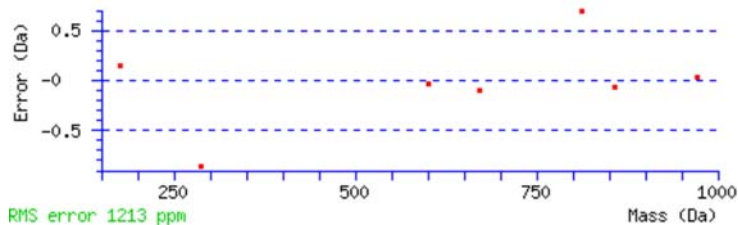



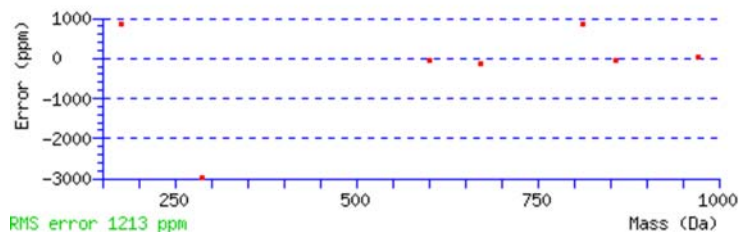

NCBI **BLAST** search of [QLADALKANR](#)

(Parameters: blastp, nr protein database, expect=20000, no filter, PAM30)

Other BLAST [web gateways](#)

**All matches to this query**

| Score | Mr(calcd): | Delta   | Sequence                     |
|-------|------------|---------|------------------------------|
| 60.3  | 1098.5782  | 1.6746  | <a href="#">AGLDAAGQGALR</a> |
| 46.5  | 1098.6145  | 1.6382  | <a href="#">QLADALKANR</a>   |
| 29.6  | 1098.6145  | 1.6382  | <a href="#">KLNEAQQLR</a>    |
| 29.6  | 1098.6761  | 1.5767  | <a href="#">QLLSLEKIR</a>    |
| 20.6  | 1098.6397  | 1.6130  | <a href="#">LESVLNVGLR</a>   |
| 20.6  | 1098.6145  | 1.6382  | <a href="#">LQGELDRLR</a>    |
| 20.3  | 1099.5370  | 0.7157  | <a href="#">SSGLANAPNNR</a>  |
| 20.2  | 1098.6761  | 1.5767  | <a href="#">LKELLSQLR</a>    |
| 19.4  | 1098.6397  | 1.6130  | <a href="#">LELAAAVVSAR</a>  |
| 19.2  | 1101.4938  | -1.2411 | <a href="#">DEDAAVPTER</a>   |

**Mascot:** <http://www.matrixscience.com/>

**MATRIX SCIENCE Mascot Search Results**

**Peptide View**

MS/MS Fragmentation of **QSSVIVQEIIQNNVVENFAEAHGEQNVSEK**  
 Found in [gi|189533132|ref|XP\\_001923741.1](#), PREDICTED: A kinase anchor protein 12 [Danio rerio]

Match to Query 118802: 3224.862723 from(1075.961517,3+) index(25679)  
 Data file TCDD\_0530.dta

Click mouse within plot area to zoom in by factor of two about that point

Or, Plot from  to  Da   
 Label all possible matches  Label matches used for scoring

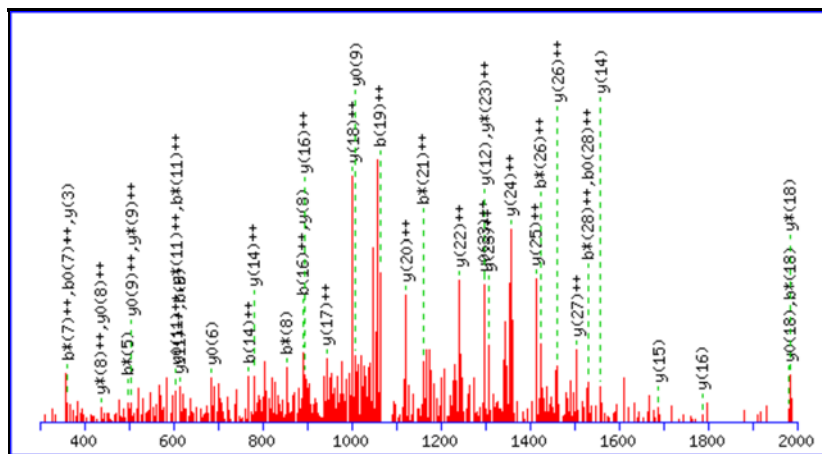

Monoisotopic mass of neutral peptide Mr(calc): 3224.5949  
 Ions Score: 43 Expect: 0.0053  
 Matches : 44/332 fragment ions using 65 most intense peaks ([help](#))

| #  | b         | b <sup>++</sup> | b*        | b <sup>*++</sup> | b <sup>0</sup> | b <sup>0++</sup> | Seq. | y         | y <sup>++</sup> | y*        | y <sup>*++</sup> | y <sup>0</sup> | y <sup>0++</sup> | #  |
|----|-----------|-----------------|-----------|------------------|----------------|------------------|------|-----------|-----------------|-----------|------------------|----------------|------------------|----|
| 1  | 129.0659  | 65.0366         | 112.0393  | 56.5233          |                |                  | Q    |           |                 |           |                  |                |                  | 29 |
| 2  | 216.0979  | 108.5526        | 199.0713  | 100.0393         | 198.0873       | 99.5473          | S    | 3097.5436 | 1549.2755       | 3080.5171 | 1540.7622        | 3079.5331      | 1540.2702        | 28 |
| 3  | 303.1299  | 152.0686        | 286.1034  | 143.5553         | 285.1193       | 143.0633         | S    | 3010.5116 | 1505.7594       | 2993.4851 | 1497.2462        | 2992.5011      | 1496.7542        | 27 |
| 4  | 402.1983  | 201.6028        | 385.1718  | 193.0895         | 384.1878       | 192.5975         | V    | 2923.4796 | 1462.2434       | 2906.4530 | 1453.7302        | 2905.4690      | 1453.2382        | 26 |
| 5  | 515.2824  | 258.1448        | 498.2558  | 249.6316         | 497.2718       | 249.1395         | I    | 2824.4112 | 1412.7092       | 2807.3846 | 1404.1960        | 2806.4006      | 1403.7039        | 25 |
| 6  | 614.3508  | 307.6790        | 597.3243  | 299.1658         | 596.3402       | 298.6738         | V    | 2711.3271 | 1356.1672       | 2694.3006 | 1347.6539        | 2693.3165      | 1347.1619        | 24 |
| 7  | 742.4094  | 371.7083        | 725.3828  | 363.1951         | 724.3988       | 362.7030         | Q    | 2612.2587 | 1306.6330       | 2595.2322 | 1298.1197        | 2594.2481      | 1297.6277        | 23 |
| 8  | 871.4520  | 436.2296        | 854.4254  | 427.7164         | 853.4414       | 427.2243         | E    | 2484.2001 | 1242.6037       | 2467.1736 | 1234.0904        | 2466.1896      | 1233.5984        | 22 |
| 9  | 984.5360  | 492.7717        | 967.5095  | 484.2584         | 966.5255       | 483.7664         | I    | 2355.1575 | 1178.0824       | 2338.1310 | 1169.5691        | 2337.1470      | 1169.0771        | 21 |
| 10 | 1097.6201 | 549.3137        | 1080.5936 | 540.8004         | 1079.6095      | 540.3084         | I    | 2242.0735 | 1121.5404       | 2225.0469 | 1113.0271        | 2224.0629      | 1112.5351        | 20 |
| 11 | 1225.6787 | 613.3430        | 1208.6521 | 604.8297         | 1207.6681      | 604.3377         | Q    | 2128.9894 | 1064.9983       | 2111.9629 | 1056.4851        | 2110.9788      | 1055.9931        | 19 |
| 12 | 1339.7216 | 670.3644        | 1322.6951 | 661.8512         | 1321.7110      | 661.3592         | N    | 2000.9308 | 1000.9690       | 1983.9043 | 992.4558         | 1982.9203      | 991.9638         | 18 |
| 13 | 1438.7900 | 719.8986        | 1421.7635 | 711.3854         | 1420.7795      | 710.8934         | V    | 1886.8879 | 943.9476        | 1869.8613 | 935.4343         | 1868.8773      | 934.9423         | 17 |
| 14 | 1537.8584 | 769.4329        | 1520.8319 | 760.9196         | 1519.8479      | 760.4276         | V    | 1787.8195 | 894.4134        | 1770.7929 | 885.9001         | 1769.8089      | 885.4081         | 16 |
| 15 | 1666.9010 | 833.9542        | 1649.8745 | 825.4409         | 1648.8905      | 824.9489         | E    | 1688.7511 | 844.8792        | 1671.7245 | 836.3659         | 1670.7405      | 835.8739         | 15 |
| 16 | 1780.9440 | 890.9756        | 1763.9174 | 882.4623         | 1762.9334      | 881.9703         | N    | 1559.7085 | 780.3579        | 1542.6819 | 771.8446         | 1541.6979      | 771.3526         | 14 |
| 17 | 1928.0124 | 964.5098        | 1910.9858 | 955.9965         | 1910.0018      | 955.5045         | F    | 1445.6655 | 723.3364        | 1428.6390 | 714.8231         | 1427.6550      | 714.3311         | 13 |
| 18 | 1999.0495 | 1000.0284       | 1982.0229 | 991.5151         | 1981.0389      | 991.0231         | A    | 1298.5971 | 649.8022        | 1281.5706 | 641.2889         | 1280.5866      | 640.7969         | 12 |
| 19 | 2128.0921 | 1064.5497       | 2111.0655 | 1056.0364        | 2110.0815      | 1055.5444        | E    | 1227.5600 | 614.2836        | 1210.5335 | 605.7704         | 1209.5495      | 605.2784         | 11 |
| 20 | 2199.1292 | 1100.0682       | 2182.1026 | 1091.5550        | 2181.1186      | 1091.0630        | A    | 1098.5174 | 549.7624        | 1081.4909 | 541.2491         | 1080.5069      | 540.7571         | 10 |
| 21 | 2336.1881 | 1168.5977       | 2319.1616 | 1160.0844        | 2318.1775      | 1159.5924        | H    | 1027.4803 | 514.2438        | 1010.4538 | 505.7305         | 1009.4697      | 505.2385         | 9  |
| 22 | 2393.2096 | 1197.1084       | 2376.1830 | 1188.5951        | 2375.1990      | 1188.1031        | G    | 890.4214  | 445.7143        | 873.3949  | 437.2011         | 872.4108       | 436.7091         | 8  |
| 23 | 2522.2522 | 1261.6297       | 2505.2256 | 1253.1164        | 2504.2416      | 1252.6244        | E    | 833.3999  | 417.2036        | 816.3734  | 408.6903         | 815.3894       | 408.1983         | 7  |
| 24 | 2650.3107 | 1325.6590       | 2633.2842 | 1317.1457        | 2632.3002      | 1316.6537        | Q    | 704.3573  | 352.6823        | 687.3308  | 344.1690         | 686.3468       | 343.6770         | 6  |

|    |           |           |           |           |           |           |   |          |          |          |          |          |          |   |
|----|-----------|-----------|-----------|-----------|-----------|-----------|---|----------|----------|----------|----------|----------|----------|---|
| 25 | 2764.3537 | 1382.6805 | 2747.3271 | 1374.1672 | 2746.3431 | 1373.6752 | N | 576.2988 | 288.6530 | 559.2722 | 280.1397 | 558.2882 | 279.6477 | 5 |
| 26 | 2863.4221 | 1432.2147 | 2846.3955 | 1423.7014 | 2845.4115 | 1423.2094 | V | 462.2558 | 231.6316 | 445.2293 | 223.1183 | 444.2453 | 222.6263 | 4 |
| 27 | 2950.4541 | 1475.7307 | 2933.4276 | 1467.2174 | 2932.4435 | 1466.7254 | S | 363.1874 | 182.0974 | 346.1609 | 173.5841 | 345.1769 | 173.0921 | 3 |
| 28 | 3079.4967 | 1540.2520 | 3062.4701 | 1531.7387 | 3061.4861 | 1531.2467 | E | 276.1554 | 138.5813 | 259.1288 | 130.0681 | 258.1448 | 129.5761 | 2 |
| 29 |           |           |           |           |           |           | K | 147.1128 | 74.0600  | 130.0863 | 65.5468  |          |          | 1 |

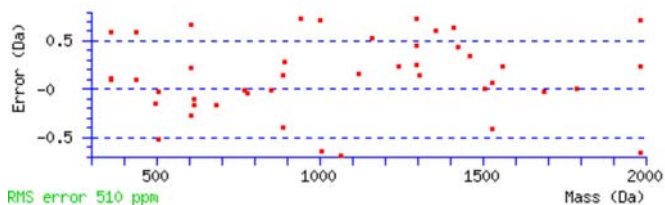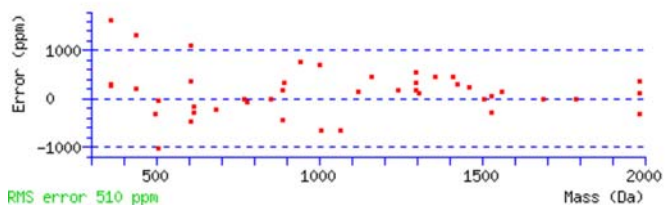

NCBI BLAST search of [QSSVIVQEIIQNVTENFAEAHGEQNVSEK](#)  
 (Parameters: blastp, nr protein database, expect=20000, no filter, PAM30)

Other BLAST [web gateways](#)

#### All matches to this query

| Score | Mr(calc): | Delta   | Sequence                                       |
|-------|-----------|---------|------------------------------------------------|
| 43.3  | 3224.5949 | 0.2678  | <a href="#">QSSVIVQEIIQNVTENFAEAHGEQNVSEK</a>  |
| 2.8   | 3223.5628 | 1.2999  | <a href="#">TLNVIMGVFVCCWLPFFILNCMVPFCK</a>    |
| 2.2   | 3225.3702 | -0.5075 | <a href="#">HLQQHENAVEGESCYYHCVLCNYSK</a>      |
| 2.0   | 3222.6732 | 2.1895  | <a href="#">LQLGSHTGSLTTNSRISDSGLYTVTSISK</a>  |
| 1.5   | 3226.6413 | -1.7786 | <a href="#">FTCVSLALLLCVQGSLSQLNVCGLAPLNNR</a> |
| 1.1   | 3223.5628 | 1.2999  | <a href="#">TLNVIMGVFVCCWLPFFILNCMVPFCK</a>    |
| 0.9   | 3223.5628 | 1.2999  | <a href="#">TLNVIMGVFVCCWLPFFILNCMVPFCK</a>    |
| 0.2   | 3223.4575 | 1.4052  | <a href="#">ADGNDSYSSVSTTGTYNMLSAIVNRPK</a>    |
| 0.1   | 3224.6870 | 0.1757  | <a href="#">STINVDILISEFLHNAGVFFTYKDVNIR</a>   |
| 0.1   | 3222.7987 | 2.0641  | <a href="#">VAMYAVMVLMLTTVFGNLLVIISISFK</a>    |

Mascot: <http://www.matrixscience.com/>

# MASCOT Search Results

## Peptide View

MS/MS Fragmentation of **RCLIEIFGILK**

Found in [gi|189532432|ref|XP\\_696565.3](#), PREDICTED: novel protein similar to vertebrate AT rich interactive domain containing protein family [Danio rerio]

Match to Query 17595: 1304.162724 from(653.088638,2+) index(183)

Data file TCDD\_0530.dta

Click mouse within plot area to zoom in by factor of two about that point

Or, Plot from  to  Da

Label all possible matches  Label matches used for scoring

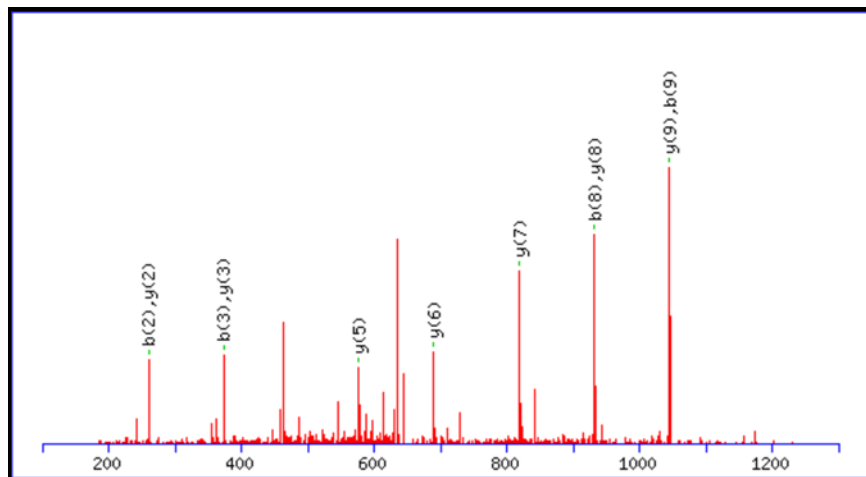

Monoisotopic mass of neutral peptide  $M_r(\text{calc})$ : 1303.7686

Ions Score: 58 Expect: 0.00054

Matches : 11/100 fragment ions using 11 most intense peaks ([help](#))

| #  | b                | b <sup>++</sup> | b*        | b <sup>*++</sup> | b <sup>0</sup> | b <sup>0++</sup> | Seq. | y                | y <sup>++</sup> | y*        | y <sup>*++</sup> | y <sup>0</sup> | y <sup>0++</sup> | #  |
|----|------------------|-----------------|-----------|------------------|----------------|------------------|------|------------------|-----------------|-----------|------------------|----------------|------------------|----|
| 1  | 157.1084         | 79.0578         | 140.0818  | 70.5446          |                |                  | R    |                  |                 |           |                  |                |                  | 11 |
| 2  | <b>260.1176</b>  | 130.5624        | 243.0910  | 122.0491         |                |                  | C    | 1148.6748        | 574.8410        | 1131.6482 | 566.3278         | 1130.6642      | 565.8357         | 10 |
| 3  | <b>373.2016</b>  | 187.1045        | 356.1751  | 178.5912         |                |                  | L    | <b>1045.6656</b> | 523.3364        | 1028.6390 | 514.8232         | 1027.6550      | 514.3312         | 9  |
| 4  | 486.2857         | 243.6465        | 469.2592  | 235.1332         |                |                  | I    | <b>932.5815</b>  | 466.7944        | 915.5550  | 458.2811         | 914.5710       | 457.7891         | 8  |
| 5  | 615.3283         | 308.1678        | 598.3017  | 299.6545         | 597.3177       | 299.1625         | E    | <b>819.4975</b>  | 410.2524        | 802.4709  | 401.7391         | 801.4869       | 401.2471         | 7  |
| 6  | 728.4124         | 364.7098        | 711.3858  | 356.1965         | 710.4018       | 355.7045         | I    | <b>690.4549</b>  | 345.7311        | 673.4283  | 337.2178         |                |                  | 6  |
| 7  | 875.4808         | 438.2440        | 858.4542  | 429.7307         | 857.4702       | 429.2387         | F    | <b>577.3708</b>  | 289.1890        | 560.3443  | 280.6758         |                |                  | 5  |
| 8  | <b>932.5022</b>  | 466.7548        | 915.4757  | 458.2415         | 914.4917       | 457.7495         | G    | 430.3024         | 215.6548        | 413.2758  | 207.1416         |                |                  | 4  |
| 9  | <b>1045.5863</b> | 523.2968        | 1028.5598 | 514.7835         | 1027.5757      | 514.2915         | I    | <b>373.2809</b>  | 187.1441        | 356.2544  | 178.6308         |                |                  | 3  |
| 10 | 1158.6704        | 579.8388        | 1141.6438 | 571.3255         | 1140.6598      | 570.8335         | L    | <b>260.1969</b>  | 130.6021        | 243.1703  | 122.0888         |                |                  | 2  |
| 11 |                  |                 |           |                  |                |                  | K    | 147.1128         | 74.0600         | 130.0863  | 65.5468          |                |                  | 1  |

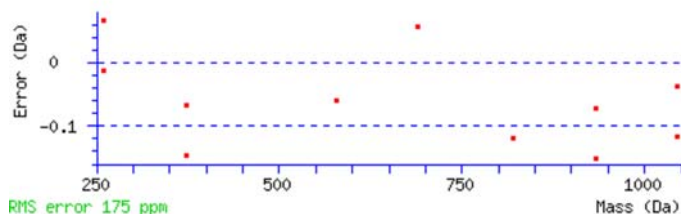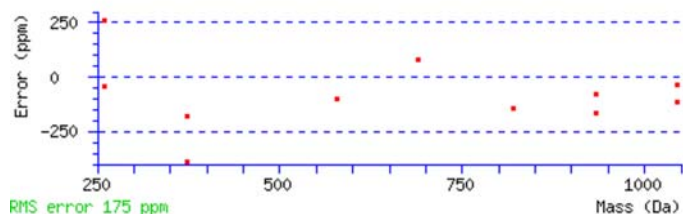

NCBI BLAST search of [RCLIEIFGILK](#)

(Parameters: blastp, nr protein database, expect=20000, no filter, PAM30)

Other BLAST [web gateways](#)

All matches to this query

| Score | Mr(calc): | Delta   | Sequence                      |
|-------|-----------|---------|-------------------------------|
| 67.1  | 1303.7057 | 0.4570  | <a href="#">MQLLEIITTDK</a>   |
| 57.8  | 1303.7686 | 0.3941  | <a href="#">RCLIEIFGILK</a>   |
| 35.4  | 1303.6871 | 0.4756  | <a href="#">DTSSDALELLIK</a>  |
| 18.4  | 1302.7296 | 1.4332  | <a href="#">FLKIAEVGAGGNK</a> |
| 18.1  | 1301.6762 | 2.4866  | <a href="#">KQLIQDVCGNK</a>   |
| 18.1  | 1304.6832 | -0.5205 | <a href="#">EIMELLMKGNK</a>   |
| 16.9  | 1302.6918 | 1.4709  | <a href="#">ELIEELTESLK</a>   |
| 16.4  | 1303.7023 | 0.4604  | <a href="#">LKFPSDLDELK</a>   |
| 16.4  | 1303.7170 | 0.4458  | <a href="#">DSGLKLLCTGLK</a>  |
| 15.9  | 1302.7031 | 1.4597  | <a href="#">EQDLSEKTLK</a>    |

Mascot: <http://www.matrixscience.com/>

# MASCOT SCIENCE Mascot Search Results

## Peptide View

MS/MS Fragmentation of **RGNDIAFHINPR**

Found in [gi|83523754|ref|NP\\_999858.2](#), chimera galectin Gal3 [Danio rerio]

Match to Query 20530: 1409.532724 from(705.773638,2+) index(74556)

Data file TCDD\_0530.dta

Click mouse within plot area to zoom in by factor of two about that point

Or, Plot from  to  Da

Label all possible matches  Label matches used for scoring

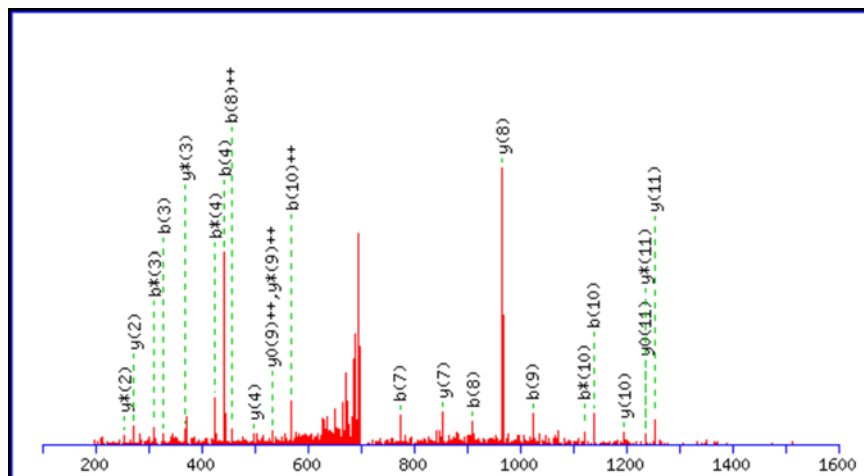

Monoisotopic mass of neutral peptide Mr(calc): 1408.7324

Ions Score: 43 Expect: 0.016

Matches : 24/110 fragment ions using 48 most intense peaks ([help](#))

| #  | b                | b <sup>++</sup> | b <sup>*</sup>   | b <sup>*++</sup> | b <sup>0</sup> | b <sup>0++</sup> | Seq. | y                | y <sup>++</sup> | y <sup>*</sup>   | y <sup>*++</sup> | y <sup>0</sup>   | y <sup>0++</sup> | #  |
|----|------------------|-----------------|------------------|------------------|----------------|------------------|------|------------------|-----------------|------------------|------------------|------------------|------------------|----|
| 1  | 157.1084         | 79.0578         | 140.0818         | 70.5446          |                |                  | R    |                  |                 |                  |                  |                  |                  | 12 |
| 2  | 214.1299         | 107.5686        | 197.1033         | 99.0553          |                |                  | G    | <b>1253.6385</b> | 627.3229        | <b>1236.6120</b> | 618.8096         | <b>1235.6280</b> | 618.3176         | 11 |
| 3  | <b>328.1728</b>  | 164.5900        | <b>311.1462</b>  | 156.0768         |                |                  | N    | <b>1196.6171</b> | 598.8122        | 1179.5905        | 590.2989         | 1178.6065        | 589.8069         | 10 |
| 4  | <b>443.1997</b>  | 222.1035        | <b>426.1732</b>  | 213.5902         | 425.1892       | 213.0982         | D    | 1082.5742        | 541.7907        | 1065.5476        | <b>533.2774</b>  | 1064.5636        | <b>532.7854</b>  | 9  |
| 5  | 556.2838         | 278.6455        | 539.2572         | 270.1323         | 538.2732       | 269.6402         | I    | <b>967.5472</b>  | 484.2772        | 950.5207         | 475.7640         |                  |                  | 8  |
| 6  | 627.3209         | 314.1641        | 610.2944         | 305.6508         | 609.3103       | 305.1588         | A    | <b>854.4631</b>  | 427.7352        | 837.4366         | 419.2219         |                  |                  | 7  |
| 7  | <b>774.3893</b>  | 387.6983        | 757.3628         | 379.1850         | 756.3787       | 378.6930         | F    | 783.4260         | 392.2167        | 766.3995         | 383.7034         |                  |                  | 6  |
| 8  | <b>911.4482</b>  | <b>456.2278</b> | 894.4217         | 447.7145         | 893.4377       | 447.2225         | H    | 636.3576         | 318.6824        | 619.3311         | 310.1692         |                  |                  | 5  |
| 9  | <b>1024.5323</b> | 512.7698        | 1007.5057        | 504.2565         | 1006.5217      | 503.7645         | I    | <b>499.2987</b>  | 250.1530        | 482.2722         | 241.6397         |                  |                  | 4  |
| 10 | <b>1138.5752</b> | <b>569.7912</b> | <b>1121.5487</b> | 561.2780         | 1120.5647      | 560.7860         | N    | 386.2146         | 193.6110        | <b>369.1881</b>  | 185.0977         |                  |                  | 3  |
| 11 | <b>1235.6280</b> | 618.3176        | 1218.6014        | 609.8044         | 1217.6174      | 609.3123         | P    | <b>272.1717</b>  | 136.5895        | <b>255.1452</b>  | 128.0762         |                  |                  | 2  |
| 12 |                  |                 |                  |                  |                |                  | R    | 175.1190         | 88.0631         | 158.0924         | 79.5498          |                  |                  | 1  |

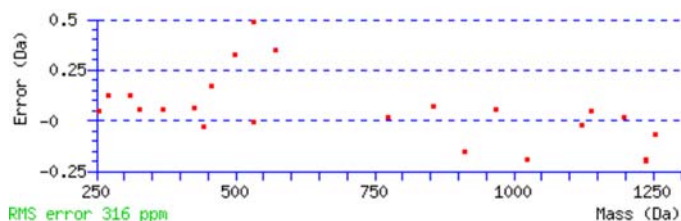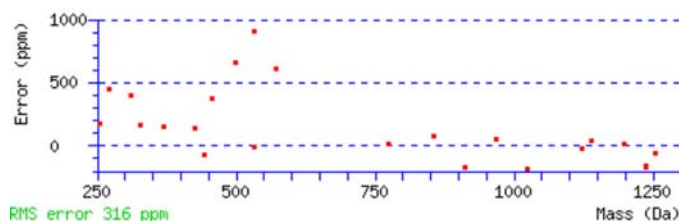

NCBI BLAST search of [RGNDIAFHINPR](#)

(Parameters: blastp, nr protein database, expect=20000, no filter, PAM30)

Other BLAST [web gateways](#)

**All matches to this query**

| Score | Mr(calc): | Delta   | Sequence                        |
|-------|-----------|---------|---------------------------------|
| 42.5  | 1408.7324 | 0.8004  | <a href="#">RGNDIAFHINPR</a>    |
| 12.1  | 1408.7020 | 0.8307  | <a href="#">ESIICVGSSYVPR</a>   |
| 11.9  | 1408.7899 | 0.7428  | <a href="#">GVGLVAANAGARTPR</a> |
| 11.7  | 1407.8085 | 1.7242  | <a href="#">EELAQIVALGIPR</a>   |
| 9.4   | 1409.7892 | -0.2564 | <a href="#">WQAGLPVAGSRLR</a>   |
| 6.9   | 1408.7786 | 0.7541  | <a href="#">ASLPQLSGLDPRR</a>   |
| 6.8   | 1408.7952 | 0.7375  | <a href="#">RPPHLRPFHPR</a>     |
| 6.7   | 1409.6609 | -0.1282 | <a href="#">DEPAPLNLACDPR</a>   |
| 6.3   | 1409.7449 | -0.2122 | <a href="#">HCASSLLLGSLPR</a>   |
| 5.6   | 1410.7150 | -1.1823 | <a href="#">ALRCLASHNPSSR</a>   |

Mascot: <http://www.matrixscience.com/>

# MASCOT SCIENCE Mascot Search Results

## Peptide View

MS/MS Fragmentation of **RYDNLKPIAEEER**

Found in [gi148596955|ref|NP\\_001091951.1](#), ATP synthase, H+ transporting, mitochondrial F0 complex, subunit E [Danio rerio]

Match to Query 27076: 1632.732724 from(817.373638,2+) index(55788)

Data file TCDD\_0530.dta

Click mouse within plot area to zoom in by factor of two about that point

Or, Plot from  to  Da

Label all possible matches  Label matches used for scoring

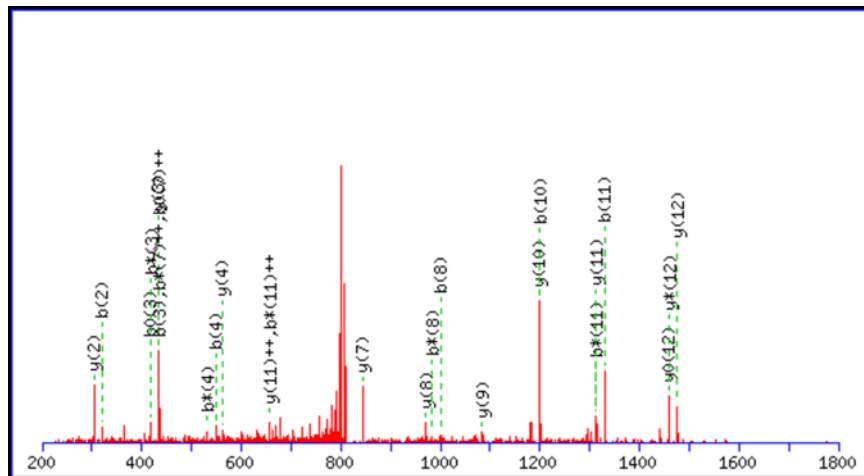

Monoisotopic mass of neutral peptide Mr(calc): 1631.8267

Ions Score: 60 Expect: 0.00025

Matches : 27/138 fragment ions using 42 most intense peaks ([help](#))

| #  | b                | b <sup>++</sup> | b <sup>*</sup>   | b <sup>*++</sup> | b <sup>0</sup>  | b <sup>0++</sup> | Seq. | y                | y <sup>++</sup> | y <sup>*</sup>   | y <sup>*++</sup> | y <sup>0</sup>   | y <sup>0++</sup> | #  |
|----|------------------|-----------------|------------------|------------------|-----------------|------------------|------|------------------|-----------------|------------------|------------------|------------------|------------------|----|
| 1  | 157.1084         | 79.0578         | 140.0818         | 70.5446          |                 |                  | R    |                  |                 |                  |                  |                  |                  | 13 |
| 2  | <b>320.1717</b>  | 160.5895        | 303.1452         | 152.0762         |                 |                  | Y    | <b>1476.7329</b> | 738.8701        | <b>1459.7064</b> | 730.3568         | <b>1458.7223</b> | 729.8648         | 12 |
| 3  | <b>435.1987</b>  | 218.1030        | <b>418.1721</b>  | 209.5897         | <b>417.1881</b> | 209.0977         | D    | <b>1313.6696</b> | <b>657.3384</b> | 1296.6430        | 648.8251         | 1295.6590        | 648.3331         | 11 |
| 4  | <b>549.2416</b>  | 275.1244        | <b>532.2150</b>  | 266.6112         | 531.2310        | 266.1191         | N    | <b>1198.6426</b> | 599.8250        | 1181.6161        | 591.3117         | 1180.6321        | 590.8197         | 10 |
| 5  | 662.3257         | 331.6665        | 645.2991         | 323.1532         | 644.3151        | 322.6612         | L    | <b>1084.5997</b> | 542.8035        | 1067.5732        | 534.2902         | 1066.5891        | 533.7982         | 9  |
| 6  | 790.4206         | 395.7139        | 773.3941         | 387.2007         | 772.4100        | 386.7087         | K    | <b>971.5156</b>  | 486.2615        | 954.4891         | 477.7482         | 953.5051         | 477.2562         | 8  |
| 7  | 887.4734         | 444.2403        | 870.4468         | <b>435.7271</b>  | 869.4628        | <b>435.2350</b>  | P    | <b>843.4207</b>  | 422.2140        | 826.3941         | 413.7007         | 825.4101         | 413.2087         | 7  |
| 8  | <b>1000.5574</b> | 500.7824        | <b>983.5309</b>  | 492.2691         | 982.5469        | 491.7771         | I    | 746.3679         | 373.6876        | 729.3414         | 365.1743         | 728.3573         | 364.6823         | 6  |
| 9  | 1071.5946        | 536.3009        | 1054.5680        | 527.7876         | 1053.5840       | 527.2956         | A    | 633.2838         | 317.1456        | 616.2573         | 308.6323         | 615.2733         | 308.1403         | 5  |
| 10 | <b>1200.6371</b> | 600.8222        | 1183.6106        | 592.3089         | 1182.6266       | 591.8169         | E    | <b>562.2467</b>  | 281.6270        | 545.2202         | 273.1137         | 544.2362         | 272.6217         | 4  |
| 11 | <b>1329.6797</b> | 665.3435        | <b>1312.6532</b> | <b>656.8302</b>  | 1311.6692       | 656.3382         | E    | <b>433.2041</b>  | 217.1057        | 416.1776         | 208.5924         | 415.1936         | 208.1004         | 3  |
| 12 | <b>1458.7223</b> | 729.8648        | 1441.6958        | 721.3515         | 1440.7118       | 720.8595         | E    | <b>304.1615</b>  | 152.5844        | 287.1350         | 144.0711         | 286.1510         | 143.5791         | 2  |
| 13 |                  |                 |                  |                  |                 |                  | R    | 175.1190         | 88.0631         | 158.0924         | 79.5498          |                  |                  | 1  |

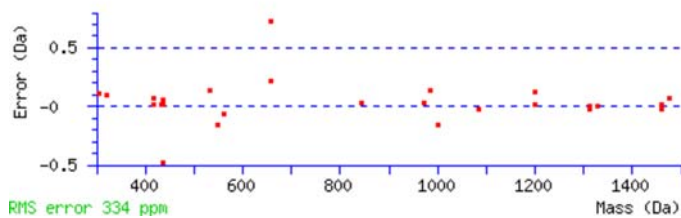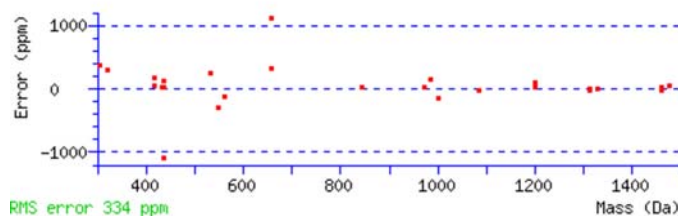

NCBI BLAST search of [RYDNLKPIAEEER](#)



(Parameters: blastp, nr protein database, expect=20000, no filter, PAM30)  
Other BLAST [web gateways](#)

**All matches to this query**

| Score | Mr(calc): | Delta   | Sequence                          |
|-------|-----------|---------|-----------------------------------|
| 60.4  | 1631.8267 | 0.9060  | <a href="#">RYDNLKPIAEEER</a>     |
| 25.8  | 1631.7937 | 0.9391  | <a href="#">EKNLEQLTQNMER</a>     |
| 9.6   | 1631.8379 | 0.8948  | <a href="#">GGFRAAAIGAVEAASER</a> |
| 8.6   | 1631.8089 | 0.9238  | <a href="#">MISDKTSHANLPYR</a>    |
| 7.6   | 1633.7737 | -1.0409 | <a href="#">SPHDDTEAFTVFLR</a>    |
| 7.5   | 1631.9246 | 0.8081  | <a href="#">SIYAELILQKALDR</a>    |
| 6.7   | 1631.7209 | 1.0118  | <a href="#">KQAGTDCENGPVEER</a>   |
| 6.4   | 1633.7770 | -1.0442 | <a href="#">EADPLFEREIMER</a>     |
| 6.3   | 1630.7627 | 1.9700  | <a href="#">GFNDDQKEQYFIK</a>     |
| 6.0   | 1630.8146 | 1.9181  | <a href="#">DLCTHICWILMRK</a>     |

**Mascot:** <http://www.matrixscience.com/>

# MASCOT SCIENCE Mascot Search Results

## Peptide View

MS/MS Fragmentation of **SAAAPPKEEAPPANAPDGDAPAEGSASAGEK**  
 Found in [gi|189525434|ref|XP\\_686365.3|](#), PREDICTED: im:7157373 [Danio rerio]

Match to Query 105450: 2859.952724 from(1430.983638,2+) index(30085)  
 Data file TCDD\_0530.dta

Click mouse within plot area to zoom in by factor of two about that point

Or, Plot from  to  Da   
 Label all possible matches  Label matches used for scoring

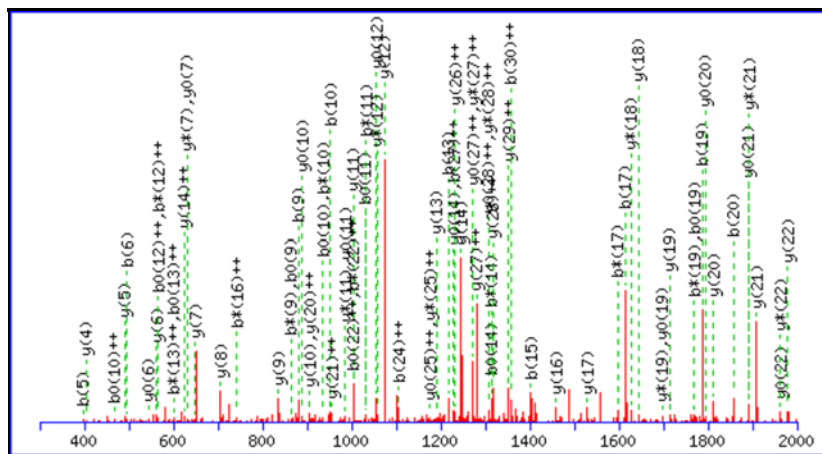

Monoisotopic mass of neutral peptide Mr(calc): 2859.3158  
 Ions Score: 67 Expect: 2.7e-005  
 Matches : 79/346 fragment ions using 161 most intense peaks ([help](#))

| #  | b                | b <sup>++</sup>  | b*               | b <sup>*++</sup> | b <sup>0</sup>   | b <sup>0++</sup> | Seq. | y                | y <sup>++</sup>  | y*               | y <sup>*++</sup> | y <sup>0</sup>   | y <sup>0++</sup> | #  |
|----|------------------|------------------|------------------|------------------|------------------|------------------|------|------------------|------------------|------------------|------------------|------------------|------------------|----|
| 1  | 88.0393          | 44.5233          |                  |                  | 70.0287          | 35.5180          | S    |                  |                  |                  |                  |                  |                  | 31 |
| 2  | 159.0764         | 80.0418          |                  |                  | 141.0659         | 71.0366          | A    | 2773.2911        | 1387.1492        | 2756.2646        | 1378.6359        | 2755.2806        | 1378.1439        | 30 |
| 3  | 230.1135         | 115.5604         |                  |                  | 212.1030         | 106.5551         | A    | 2702.2540        | <b>1351.6306</b> | 2685.2275        | 1343.1174        | 2684.2434        | 1342.6254        | 29 |
| 4  | 301.1506         | 151.0790         |                  |                  | 283.1401         | 142.0737         | A    | 2631.2169        | <b>1316.1121</b> | 2614.1903        | <b>1307.5988</b> | 2613.2063        | <b>1307.1068</b> | 28 |
| 5  | <b>398.2034</b>  | 199.6053         |                  |                  | 380.1928         | 190.6001         | P    | 2560.1798        | <b>1280.5935</b> | 2543.1532        | <b>1272.0803</b> | 2542.1692        | <b>1271.5882</b> | 27 |
| 6  | <b>495.2562</b>  | 248.1317         |                  |                  | 477.2456         | 239.1264         | P    | 2463.1270        | <b>1232.0671</b> | 2446.1005        | 1223.5539        | 2445.1165        | 1223.0619        | 26 |
| 7  | 623.3511         | 312.1792         | 606.3246         | 303.6659         | 605.3406         | 303.1739         | K    | 2366.0743        | 1183.5408        | 2349.0477        | <b>1175.0275</b> | 2348.0637        | <b>1174.5355</b> | 25 |
| 8  | 752.3937         | 376.7005         | 735.3672         | 368.1872         | 734.3832         | 367.6952         | E    | 2237.9793        | 1119.4933        | 2220.9527        | 1110.9800        | 2219.9687        | 1110.4880        | 24 |
| 9  | <b>881.4363</b>  | 441.2218         | <b>864.4098</b>  | 432.7085         | <b>863.4258</b>  | 432.2165         | E    | 2108.9367        | 1054.9720        | 2091.9101        | 1046.4587        | 2090.9261        | 1045.9667        | 23 |
| 10 | <b>952.4734</b>  | 476.7404         | <b>935.4469</b>  | 468.2271         | <b>934.4629</b>  | <b>467.7351</b>  | A    | <b>1979.8941</b> | 990.4507         | <b>1962.8676</b> | 981.9374         | <b>1961.8835</b> | 981.4454         | 22 |
| 11 | 1049.5262        | 525.2667         | <b>1032.4997</b> | 516.7535         | <b>1031.5156</b> | 516.2615         | P    | <b>1908.8570</b> | <b>954.9321</b>  | <b>1891.8304</b> | 946.4189         | <b>1890.8464</b> | 945.9269         | 21 |
| 12 | 1146.5790        | 573.7931         | 1129.5524        | <b>565.2798</b>  | 1128.5684        | <b>564.7878</b>  | P    | <b>1811.8042</b> | <b>906.4058</b>  | 1794.7777        | 897.8925         | <b>1793.7937</b> | 897.4005         | 20 |
| 13 | <b>1217.6161</b> | 609.3117         | 1200.5895        | <b>600.7984</b>  | 1199.6055        | <b>600.3064</b>  | A    | <b>1714.7515</b> | 857.8794         | <b>1697.7249</b> | 849.3661         | <b>1696.7409</b> | 848.8741         | 19 |
| 14 | 1331.6590        | 666.3331         | <b>1314.6325</b> | 657.8199         | <b>1313.6484</b> | 657.3279         | N    | <b>1643.7143</b> | 822.3608         | <b>1626.6878</b> | 813.8475         | 1625.7038        | 813.3555         | 18 |
| 15 | <b>1402.6961</b> | 701.8517         | 1385.6696        | 693.3384         | 1384.6856        | 692.8464         | A    | <b>1529.6714</b> | 765.3393         | 1512.6449        | 756.8261         | 1511.6609        | 756.3341         | 17 |
| 16 | 1499.7489        | 750.3781         | 1482.7223        | <b>741.8648</b>  | 1481.7383        | 741.3728         | P    | <b>1458.6343</b> | 729.8208         | 1441.6078        | 721.3075         | 1440.6237        | 720.8155         | 16 |
| 17 | <b>1614.7758</b> | 807.8916         | <b>1597.7493</b> | 799.3783         | 1596.7653        | 798.8863         | D    | 1361.5815        | 681.2944         | 1344.5550        | 672.7811         | 1343.5710        | 672.2891         | 15 |
| 18 | 1671.7973        | 836.4023         | 1654.7707        | 827.8890         | 1653.7867        | 827.3970         | G    | <b>1246.5546</b> | <b>623.7809</b>  | 1229.5281        | 615.2677         | <b>1228.5440</b> | 614.7757         | 14 |
| 19 | <b>1786.8242</b> | 893.9158         | <b>1769.7977</b> | 885.4025         | <b>1768.8137</b> | 884.9105         | D    | <b>1189.5331</b> | 595.2702         | 1172.5066        | 586.7569         | 1171.5226        | 586.2649         | 13 |
| 20 | <b>1857.8613</b> | 929.4343         | 1840.8348        | 920.9210         | 1839.8508        | 920.4290         | A    | <b>1074.5062</b> | 537.7567         | <b>1057.4796</b> | 529.2435         | <b>1056.4956</b> | 528.7515         | 12 |
| 21 | 1954.9141        | 977.9607         | 1937.8876        | 969.4474         | 1936.9035        | 968.9554         | P    | <b>1003.4691</b> | 502.2382         | <b>986.4425</b>  | 493.7249         | <b>985.4585</b>  | 493.2329         | 11 |
| 22 | 2025.9512        | 1013.4793        | 2008.9247        | <b>1004.9660</b> | 2007.9407        | <b>1004.4740</b> | A    | <b>906.4163</b>  | 453.7118         | 889.3898         | 445.1985         | <b>888.4058</b>  | 444.7065         | 10 |
| 23 | 2154.9938        | 1078.0005        | 2137.9673        | 1069.4873        | 2136.9833        | 1068.9953        | E    | <b>835.3792</b>  | 418.1932         | 818.3527         | 409.6800         | 817.3686         | 409.1880         | 9  |
| 24 | 2212.0153        | <b>1106.5113</b> | 2194.9887        | 1097.9980        | 2194.0047        | 1097.5060        | G    | <b>706.3366</b>  | 353.6719         | 689.3101         | 345.1587         | 688.3260         | 344.6667         | 8  |

|    |           |           |           |           |           |           |   |          |          |          |          |          |          |   |
|----|-----------|-----------|-----------|-----------|-----------|-----------|---|----------|----------|----------|----------|----------|----------|---|
| 25 | 2299.0473 | 1150.0273 | 2282.0208 | 1141.5140 | 2281.0367 | 1141.0220 | S | 649.3151 | 325.1612 | 632.2886 | 316.6479 | 631.3046 | 316.1559 | 7 |
| 26 | 2370.0844 | 1185.5459 | 2353.0579 | 1177.0326 | 2352.0739 | 1176.5406 | A | 562.2831 | 281.6452 | 545.2566 | 273.1319 | 544.2726 | 272.6399 | 6 |
| 27 | 2457.1165 | 1229.0619 | 2440.0899 | 1220.5486 | 2439.1059 | 1220.0566 | S | 491.2460 | 246.1266 | 474.2195 | 237.6134 | 473.2354 | 237.1214 | 5 |
| 28 | 2528.1536 | 1264.5804 | 2511.1270 | 1256.0671 | 2510.1430 | 1255.5751 | A | 404.2140 | 202.6106 | 387.1874 | 194.0974 | 386.2034 | 193.6053 | 4 |
| 29 | 2585.1750 | 1293.0912 | 2568.1485 | 1284.5779 | 2567.1645 | 1284.0859 | G | 333.1769 | 167.0921 | 316.1503 | 158.5788 | 315.1663 | 158.0868 | 3 |
| 30 | 2714.2176 | 1357.6125 | 2697.1911 | 1349.0992 | 2696.2071 | 1348.6072 | E | 276.1554 | 138.5813 | 259.1288 | 130.0681 | 258.1448 | 129.5761 | 2 |
| 31 |           |           |           |           |           |           | K | 147.1128 | 74.0600  | 130.0863 | 65.5468  |          |          | 1 |

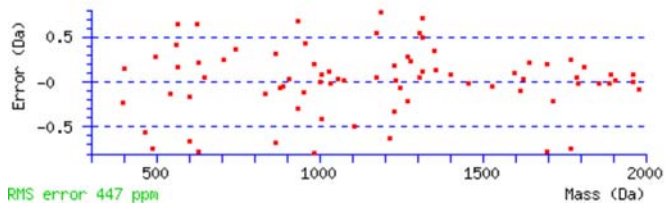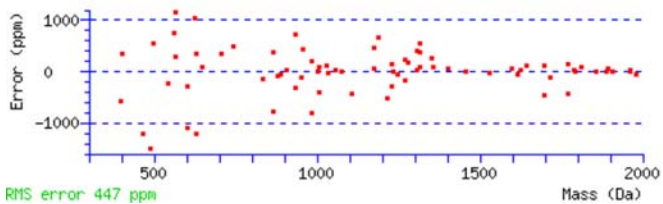

NCBI **BLAST** search of [SAAAPPKEEAPPANAPDGDAPAEGSASAGEK](#)  
 (Parameters: blastp, nr protein database, expect=20000, no filter, PAM30)  
 Other BLAST [web gateways](#)

**All matches to this query**

| Score | Mr(calc): | Delta   | Sequence                                        |
|-------|-----------|---------|-------------------------------------------------|
| 67.1  | 2859.3158 | 0.6369  | <a href="#">SAAAPPKEEAPPANAPDGDAPAEGSASAGEK</a> |
| 2.8   | 2862.3728 | -2.4201 | <a href="#">CLVRMGYQCTFGVLQAGQYGVAQTR</a>       |

**Mascot:** <http://www.matrixscience.com/>

# MASCOT SCIENCE Mascot Search Results

## Peptide View

MS/MS Fragmentation of **SAGLEVDSDFFGGYR**

Found in [gi|41056175|ref|NP\\_956396.1](#), programmed cell death 8 (apoptosis-inducing factor) [Danio rerio]

Match to Query 22199: 1471.282724 from(736.648638,2+) index(8657)

Data file TCDD\_0530.dta

Click mouse within plot area to zoom in by factor of two about that point

Or, Plot from  to  Da

Label all possible matches  Label matches used for scoring

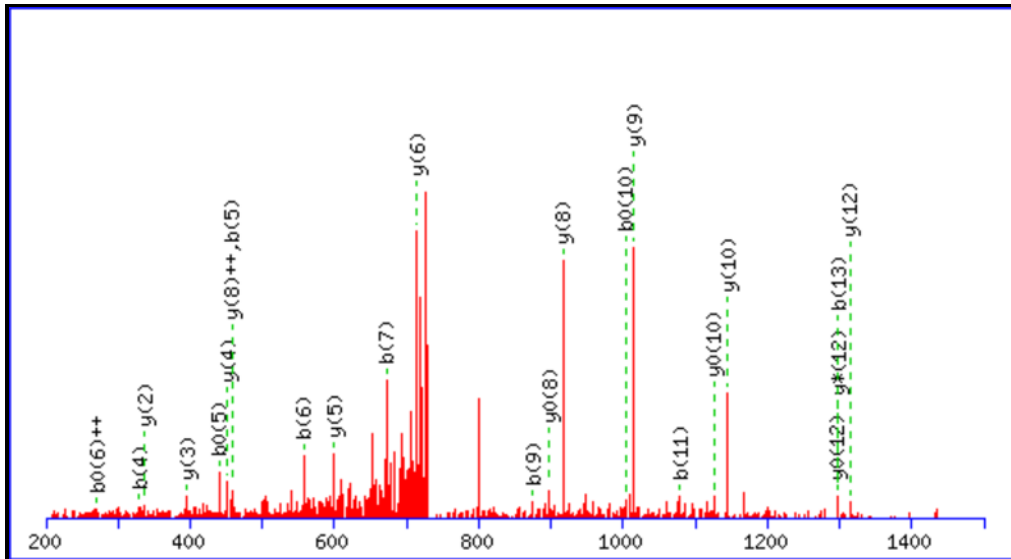

Monoisotopic mass of neutral peptide  $M_r(\text{calc})$ : 1471.6579

Ions Score: 62 Expect: 0.00018

Matches : 24/120 fragment ions using 39 most intense peaks ([help](#))

| #  | b                | b <sup>++</sup> | b <sup>0</sup>   | b <sup>0++</sup> | Seq. | y                | y <sup>++</sup> | y*               | y <sup>*++</sup> | y <sup>0</sup>   | y <sup>0++</sup> | #  |
|----|------------------|-----------------|------------------|------------------|------|------------------|-----------------|------------------|------------------|------------------|------------------|----|
| 1  | 88.0393          | 44.5233         | 70.0287          | 35.5180          | S    |                  |                 |                  |                  |                  |                  | 14 |
| 2  | 159.0764         | 80.0418         | 141.0659         | 71.0366          | A    | 1385.6332        | 693.3202        | 1368.6066        | 684.8070         | 1367.6226        | 684.3149         | 13 |
| 3  | 216.0979         | 108.5526        | 198.0873         | 99.5473          | G    | <b>1314.5961</b> | 657.8017        | <b>1297.5695</b> | 649.2884         | <b>1296.5855</b> | 648.7964         | 12 |
| 4  | <b>329.1819</b>  | 165.0946        | 311.1714         | 156.0893         | L    | 1257.5746        | 629.2909        | 1240.5481        | 620.7777         | 1239.5640        | 620.2857         | 11 |
| 5  | <b>458.2245</b>  | 229.6159        | <b>440.2140</b>  | 220.6106         | E    | <b>1144.4905</b> | 572.7489        | 1127.4640        | 564.2356         | <b>1126.4800</b> | 563.7436         | 10 |
| 6  | <b>557.2930</b>  | 279.1501        | 539.2824         | <b>270.1448</b>  | V    | <b>1015.4480</b> | 508.2276        | 998.4214         | 499.7143         | 997.4374         | 499.2223         | 9  |
| 7  | <b>672.3199</b>  | 336.6636        | 654.3093         | 327.6583         | D    | <b>916.3795</b>  | <b>458.6934</b> | 899.3530         | 450.1801         | <b>898.3690</b>  | 449.6881         | 8  |
| 8  | 759.3519         | 380.1796        | 741.3414         | 371.1743         | S    | 801.3526         | 401.1799        | 784.3260         | 392.6667         | 783.3420         | 392.1747         | 7  |
| 9  | <b>874.3789</b>  | 437.6931        | 856.3683         | 428.6878         | D    | <b>714.3206</b>  | 357.6639        | 697.2940         | 349.1506         | 696.3100         | 348.6586         | 6  |
| 10 | 1021.4473        | 511.2273        | <b>1003.4367</b> | 502.2220         | F    | <b>599.2936</b>  | 300.1504        | 582.2671         | 291.6372         |                  |                  | 5  |
| 11 | <b>1078.4687</b> | 539.7380        | 1060.4582        | 530.7327         | G    | <b>452.2252</b>  | 226.6162        | 435.1987         | 218.1030         |                  |                  | 4  |
| 12 | 1135.4902        | 568.2487        | 1117.4796        | 559.2435         | G    | <b>395.2037</b>  | 198.1055        | 378.1772         | 189.5922         |                  |                  | 3  |
| 13 | <b>1298.5535</b> | 649.7804        | 1280.5430        | 640.7751         | Y    | <b>338.1823</b>  | 169.5948        | 321.1557         | 161.0815         |                  |                  | 2  |
| 14 |                  |                 |                  |                  | R    | 175.1190         | 88.0631         | 158.0924         | 79.5498          |                  |                  | 1  |

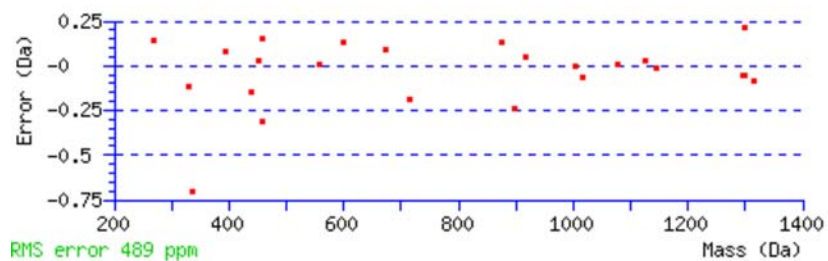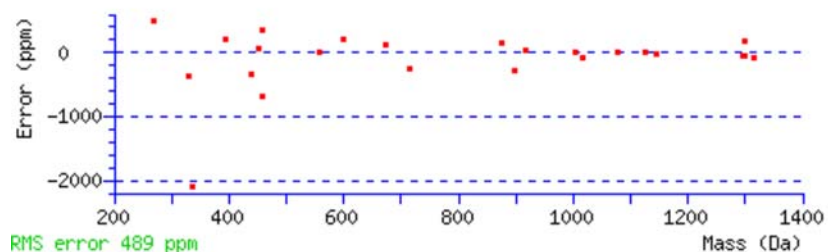

NCBI **BLAST** search of [SAGLEVDSDFGGYR](#)  
 (Parameters: blastp, nr protein database, expect=20000, no filter, PAM30)  
 Other BLAST [web gateways](#)

**All matches to this query**

| Score | Mr(calc): | Delta   | Sequence                        |
|-------|-----------|---------|---------------------------------|
| 62.0  | 1471.6579 | -0.3752 | <a href="#">SAGLEVDSDFGGYR</a>  |
| 10.5  | 1471.7994 | -0.5167 | <a href="#">SIAGEVVSLKGQER</a>  |
| 9.6   | 1470.7678 | 0.5149  | <a href="#">KAQEV DALINENK</a>  |
| 7.0   | 1469.8640 | 1.4188  | <a href="#">VALLASLMDVIGLR</a>  |
| 6.1   | 1469.8388 | 1.4439  | <a href="#">RDGLLCDVILVVR</a>   |
| 5.9   | 1469.8282 | 1.4545  | <a href="#">TLQIVFNLF FTK</a>   |
| 5.5   | 1473.7722 | -2.4895 | <a href="#">NCGKVLSTAAGIQR</a>  |
| 5.3   | 1469.8242 | 1.4585  | <a href="#">APEPPLTLPPP VSR</a> |
| 4.7   | 1471.8762 | -0.5935 | <a href="#">WTAVLLTLLSLSR</a>   |
| 4.5   | 1471.8511 | -0.5684 | <a href="#">VFQDVAQKVVAIR</a>   |

**Mascot:** <http://www.matrixscience.com/>

# MASCOT SCIENCE Mascot Search Results

## Peptide View

MS/MS Fragmentation of **SAPLVGTATTQLISGLPSLPSHGGR**

Found in [gi|61651682|ref|NP\\_001013279.1](#), fibronectin 1b [Danio rerio]

Match to Query 87432: 2417.172723 from(806.731517,3+) index(34867)

Data file TCDD\_0530.dta

Click mouse within plot area to zoom in by factor of two about that point

Or, Plot from  to  Da

Label all possible matches  Label matches used for scoring

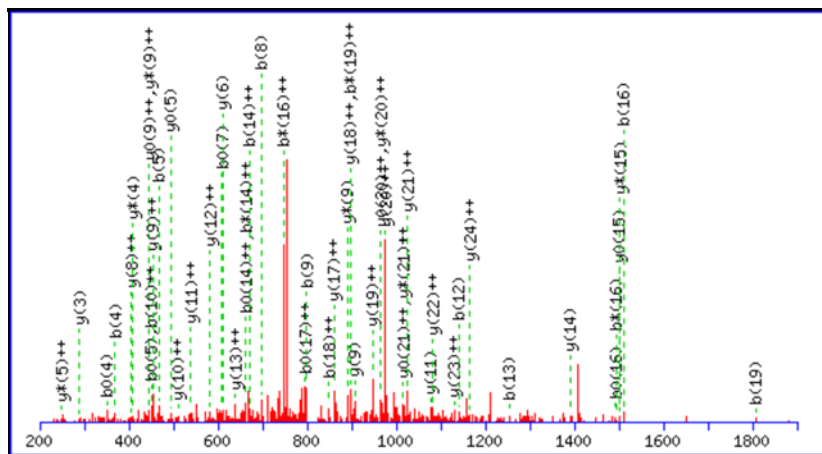

Monoisotopic mass of neutral peptide Mr(calc): 2416.3074

Ions Score: 41 Expect: 0.013

Matches : 52/260 fragment ions using 133 most intense peaks ([help](#))

| #  | b                | b <sup>++</sup> | b*               | b <sup>*++</sup> | b <sup>0</sup>   | b <sup>0++</sup> | Seq. | y                | y <sup>++</sup>  | y*               | y <sup>*++</sup> | y <sup>0</sup>   | y <sup>0++</sup> | #  |
|----|------------------|-----------------|------------------|------------------|------------------|------------------|------|------------------|------------------|------------------|------------------|------------------|------------------|----|
| 1  | 88.0393          | 44.5233         |                  |                  | 70.0287          | 35.5180          | S    |                  |                  |                  |                  |                  |                  | 25 |
| 2  | 159.0764         | 80.0418         |                  |                  | 141.0659         | 71.0366          | A    | 2330.2827        | 1165.6450        | 2313.2561        | 1157.1317        | 2312.2721        | 1156.6397        | 24 |
| 3  | 256.1292         | 128.5682        |                  |                  | 238.1186         | 119.5629         | P    | 2259.2456        | 1130.1264        | 2242.2190        | 1121.6131        | 2241.2350        | 1121.1211        | 23 |
| 4  | <b>369.2132</b>  | 185.1103        |                  |                  | <b>351.2027</b>  | 176.1050         | L    | 2162.1928        | <b>1081.6000</b> | 2145.1662        | 1073.0868        | 2144.1822        | 1072.5948        | 22 |
| 5  | <b>468.2817</b>  | 234.6445        |                  |                  | <b>450.2711</b>  | 225.6392         | V    | 2049.1087        | <b>1025.0580</b> | 2032.0822        | <b>1016.5447</b> | 2031.0982        | <b>1016.0527</b> | 21 |
| 6  | 525.3031         | 263.1552        |                  |                  | 507.2926         | 254.1499         | G    | 1950.0403        | <b>975.5238</b>  | 1933.0138        | <b>967.0105</b>  | 1932.0298        | <b>966.5185</b>  | 20 |
| 7  | 626.3508         | 313.6790        |                  |                  | <b>608.3402</b>  | 304.6738         | T    | 1893.0189        | <b>947.0131</b>  | 1875.9923        | 938.4998         | 1875.0083        | 938.0078         | 19 |
| 8  | <b>697.3879</b>  | 349.1976        |                  |                  | 679.3774         | 340.1923         | A    | 1791.9712        | <b>896.4892</b>  | 1774.9446        | 887.9760         | 1773.9606        | 887.4839         | 18 |
| 9  | <b>798.4356</b>  | 399.7214        |                  |                  | 780.4250         | 390.7162         | T    | 1720.9341        | <b>860.9707</b>  | 1703.9075        | 852.4574         | 1702.9235        | 851.9654         | 17 |
| 10 | 899.4833         | <b>450.2453</b> |                  |                  | 881.4727         | 441.2400         | T    | 1619.8864        | 810.4468         | 1602.8598        | 801.9336         | 1601.8758        | 801.4415         | 16 |
| 11 | 1027.5419        | 514.2746        | 1010.5153        | 505.7613         | 1009.5313        | 505.2693         | Q    | 1518.8387        | 759.9230         | <b>1501.8122</b> | 751.4097         | <b>1500.8281</b> | 750.9177         | 15 |
| 12 | <b>1140.6259</b> | 570.8166        | 1123.5994        | 562.3033         | 1122.6154        | 561.8113         | L    | <b>1390.7801</b> | 695.8937         | 1373.7536        | 687.3804         | 1372.7696        | 686.8884         | 14 |
| 13 | <b>1253.7100</b> | 627.3586        | 1236.6834        | 618.8454         | 1235.6994        | 618.3533         | I    | 1277.6961        | <b>639.3517</b>  | 1260.6695        | 630.8384         | 1259.6855        | 630.3464         | 13 |
| 14 | 1340.7420        | <b>670.8746</b> | 1323.7155        | <b>662.3614</b>  | 1322.7314        | <b>661.8694</b>  | S    | 1164.6120        | <b>582.8096</b>  | 1147.5854        | 574.2964         | 1146.6014        | 573.8044         | 12 |
| 15 | 1397.7635        | 699.3854        | 1380.7369        | 690.8721         | 1379.7529        | 690.3801         | G    | <b>1077.5800</b> | <b>539.2936</b>  | 1060.5534        | 530.7803         | 1059.5694        | 530.2883         | 11 |
| 16 | <b>1510.8475</b> | 755.9274        | <b>1493.8210</b> | <b>747.4141</b>  | <b>1492.8370</b> | 746.9221         | L    | 1020.5585        | <b>510.7829</b>  | 1003.5320        | 502.2696         | 1002.5479        | 501.7776         | 10 |
| 17 | 1607.9003        | 804.4538        | 1590.8738        | 795.9405         | 1589.8897        | <b>795.4485</b>  | P    | <b>907.4744</b>  | <b>454.2409</b>  | <b>890.4479</b>  | <b>445.7276</b>  | 889.4639         | <b>445.2356</b>  | 9  |
| 18 | 1694.9323        | <b>847.9698</b> | 1677.9058        | 839.4565         | 1676.9218        | 838.9645         | S    | 810.4217         | <b>405.7145</b>  | 793.3951         | 397.2012         | 792.4111         | 396.7092         | 8  |
| 19 | <b>1808.0164</b> | 904.5118        | 1790.9898        | <b>895.9986</b>  | 1790.0058        | 895.5066         | L    | 723.3896         | 362.1985         | 706.3631         | 353.6852         | 705.3791         | 353.1932         | 7  |
| 20 | 1905.0692        | 953.0382        | 1888.0426        | 944.5249         | 1887.0586        | 944.0329         | P    | <b>610.3056</b>  | 305.6564         | 593.2790         | 297.1432         | 592.2950         | 296.6511         | 6  |
| 21 | 1992.1012        | 996.5542        | 1975.0746        | 988.0410         | 1974.0906        | 987.5489         | S    | 513.2528         | 257.1300         | 496.2263         | <b>248.6168</b>  | <b>495.2423</b>  | 248.1248         | 5  |
| 22 | 2129.1601        | 1065.0837       | 2112.1335        | 1056.5704        | 2111.1495        | 1056.0784        | H    | 426.2208         | 213.6140         | <b>409.1942</b>  | 205.1008         |                  |                  | 4  |
| 23 | 2186.1816        | 1093.5944       | 2169.1550        | 1085.0811        | 2168.1710        | 1084.5891        | G    | <b>289.1619</b>  | 145.0846         | 272.1353         | 136.5713         |                  |                  | 3  |
| 24 | 2243.2030        | 1122.1052       | 2226.1765        | 1113.5919        | 2225.1925        | 1113.0999        | G    | 232.1404         | 116.5738         | 215.1139         | 108.0606         |                  |                  | 2  |

|    |  |  |  |  |  |  |   |          |         |          |         |  |  |   |
|----|--|--|--|--|--|--|---|----------|---------|----------|---------|--|--|---|
| 25 |  |  |  |  |  |  | R | 175.1190 | 88.0631 | 158.0924 | 79.5498 |  |  | 1 |
|----|--|--|--|--|--|--|---|----------|---------|----------|---------|--|--|---|

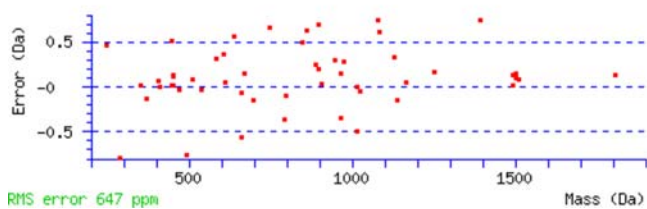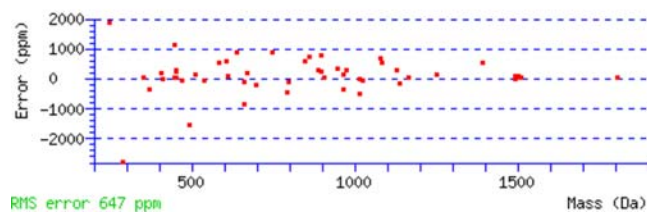

NCBI BLAST search of [SAPLVGTATTQLISGLPSLPSHGGR](#)  
 (Parameters: blastp, nr protein database, expect=20000, no filter, PAM30)  
 Other BLAST [web gateways](#)

**All matches to this query**

| Score | Mr(calc): | Delta   | Sequence                                  |
|-------|-----------|---------|-------------------------------------------|
| 41.1  | 2416.3074 | 0.8653  | <a href="#">SAPLVGTATTQLISGLPSLPSHGGR</a> |
| 4.4   | 2415.1754 | 1.9973  | <a href="#">NVLGHMQGGTPTPFDRNFATK</a>     |
| 4.0   | 2419.2305 | -2.0578 | <a href="#">EKLVI SEDCELVTVVDVYPGR</a>    |
| 1.9   | 2419.1091 | -1.9364 | <a href="#">CVVLLSCTTAWPNCCAIHCR</a>      |
| 1.5   | 2416.1805 | 0.9922  | <a href="#">IIIQRAANGGQECPTLFEER</a>      |
| 1.3   | 2415.1190 | 2.0537  | <a href="#">DEVKHGVELADLSEDPEYSQR</a>     |
| 1.0   | 2417.9271 | -0.7544 | <a href="#">AGYRLNADGCGCDDVDECASDR</a>    |
| 0.8   | 2419.4429 | -2.2702 | <a href="#">IIAGGMVIGSLIVGLLFALLFFR</a>   |
| 0.6   | 2419.0573 | -1.8845 | <a href="#">THTGEKPYKCEYCDYAAAQK</a>      |
| 0.6   | 2418.1146 | -0.9419 | <a href="#">LDNLPSLQIEISR DGSNGSDSDS</a>  |

Mascot: <http://www.matrixscience.com/>



# MASCOT SCIENCE Mascot Search Results

## Peptide View

MS/MS Fragmentation of **SELFVATGDGGDNHQNPK**

Found in [gi|52219158|ref|NP\\_001004661.1](#), aquaporin 8 [Danio rerio]

Match to Query 54189: 2115.262724 from(1058.638638,2+) index(19538)

Data file TCDD\_0530.dta

Click mouse within plot area to zoom in by factor of two about that point

Or, Plot from  to  Da

Label all possible matches  Label matches used for scoring

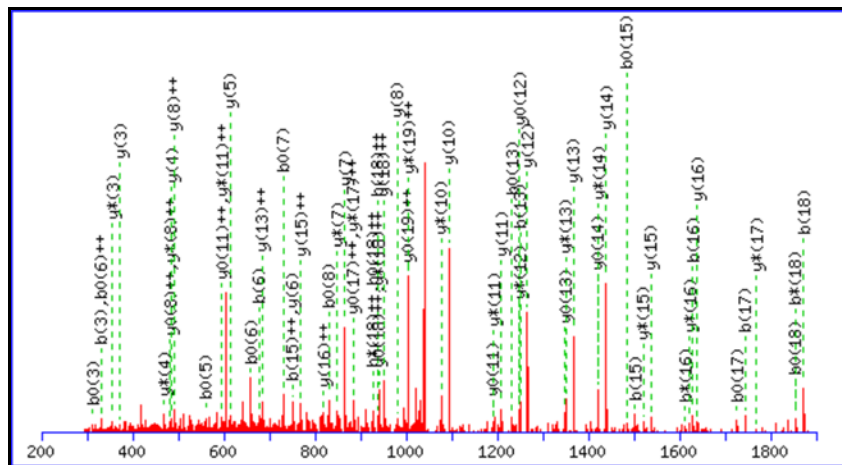

Monoisotopic mass of neutral peptide  $M_r(\text{calc})$ : 2113.9665

Ions Score: 49 Expect: 0.0024

Matches : 66/188 fragment ions using 144 most intense peaks ([help](#))

| #  | b                | b <sup>++</sup> | b*        | b <sup>*++</sup> | b <sup>0</sup> | b <sup>0++</sup> | Seq. | y         | y <sup>++</sup> | y*        | y <sup>*++</sup> | y <sup>0</sup> | y <sup>0++</sup> | #  |
|----|------------------|-----------------|-----------|------------------|----------------|------------------|------|-----------|-----------------|-----------|------------------|----------------|------------------|----|
| 1  | 88.0393          | 44.5233         |           |                  | 70.0287        | 35.5180          | S    |           |                 |           |                  |                |                  | 20 |
| 2  | 217.0819         | 109.0446        |           |                  | 199.0713       | 100.0393         | E    | 2027.9417 | 1014.4745       | 2010.9152 | 1005.9612        | 2009.9312      | 1005.4692        | 19 |
| 3  | <b>330.1660</b>  | 165.5866        |           |                  | 312.1554       | 156.5813         | L    | 1898.8991 | 949.9532        | 1881.8726 | 941.4399         | 1880.8886      | 940.9479         | 18 |
| 4  | 477.2344         | 239.1208        |           |                  | 459.2238       | 230.1155         | F    | 1785.8151 | 893.4112        | 1768.7885 | 884.8979         | 1767.8045      | 884.4059         | 17 |
| 5  | 578.2821         | 289.6447        |           |                  | 560.2715       | 280.6394         | T    | 1638.7467 | 819.8770        | 1621.7201 | 811.3637         | 1620.7361      | 810.8717         | 16 |
| 6  | <b>677.3505</b>  | 339.1789        |           |                  | 659.3399       | 330.1736         | V    | 1537.6990 | 769.3531        | 1520.6724 | 760.8399         | 1519.6884      | 760.3478         | 15 |
| 7  | 748.3876         | 374.6974        |           |                  | 730.3770       | 365.6921         | A    | 1438.6306 | 719.8189        | 1421.6040 | 711.3056         | 1420.6200      | 710.8136         | 14 |
| 8  | 849.4353         | 425.2213        |           |                  | 831.4247       | 416.2160         | T    | 1367.5934 | 684.3004        | 1350.5669 | 675.7871         | 1349.5829      | 675.2951         | 13 |
| 9  | 906.4567         | 453.7320        |           |                  | 888.4462       | 444.7267         | G    | 1266.5458 | 633.7765        | 1249.5192 | 625.2632         | 1248.5352      | 624.7712         | 12 |
| 10 | 1021.4837        | 511.2455        |           |                  | 1003.4731      | 502.2402         | D    | 1209.5243 | 605.2658        | 1192.4978 | 596.7525         | 1191.5137      | 596.2605         | 11 |
| 11 | 1078.5051        | 539.7562        |           |                  | 1060.4946      | 530.7509         | G    | 1094.4974 | 547.7523        | 1077.4708 | 539.2390         | 1076.4868      | 538.7470         | 10 |
| 12 | 1135.5266        | 568.2669        |           |                  | 1117.5160      | 559.2617         | G    | 1037.4759 | 519.2416        | 1020.4493 | 510.7283         | 1019.4653      | 510.2363         | 9  |
| 13 | <b>1250.5535</b> | 625.7804        |           |                  | 1232.5430      | 616.7751         | D    | 980.4544  | 490.7309        | 963.4279  | 482.2176         | 962.4439       | 481.7256         | 8  |
| 14 | 1364.5965        | 682.8019        | 1347.5699 | 674.2886         | 1346.5859      | 673.7966         | N    | 865.4275  | 433.2174        | 848.4009  | 424.7041         |                |                  | 7  |
| 15 | <b>1501.6554</b> | <b>751.3313</b> | 1484.6288 | 742.8181         | 1483.6448      | 742.3260         | H    | 751.3846  | 376.1959        | 734.3580  | 367.6826         |                |                  | 6  |
| 16 | <b>1629.7140</b> | 815.3606        | 1612.6874 | 806.8473         | 1611.7034      | 806.3553         | Q    | 614.3257  | 307.6665        | 597.2991  | 299.1532         |                |                  | 5  |
| 17 | <b>1743.7569</b> | 872.3821        | 1726.7303 | 863.8688         | 1725.7463      | 863.3768         | N    | 486.2671  | 243.6372        | 469.2405  | 235.1239         |                |                  | 4  |
| 18 | <b>1871.8155</b> | 936.4114        | 1854.7889 | 927.8981         | 1853.8049      | 927.4061         | Q    | 372.2241  | 186.6157        | 355.1976  | 178.1024         |                |                  | 3  |
| 19 | 1968.8682        | 984.9378        | 1951.8417 | 976.4245         | 1950.8577      | 975.9325         | P    | 244.1656  | 122.5864        | 227.1390  | 114.0731         |                |                  | 2  |
| 20 |                  |                 |           |                  |                |                  | K    | 147.1128  | 74.0600         | 130.0863  | 65.5468          |                |                  | 1  |



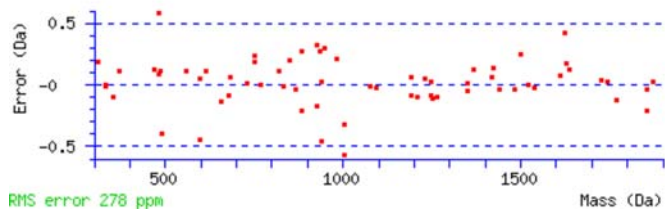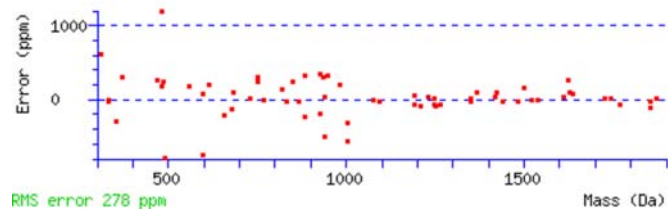

NCBI **BLAST** search of [SELFVATGDGGDNHQNPQK](#)  
 (Parameters: blastp, nr protein database, expect=20000, no filter, PAM30)  
 Other BLAST [web gateways](#)

**All matches to this query**

| Score | Mr(calc): | Delta   | Sequence                              |
|-------|-----------|---------|---------------------------------------|
| 49.3  | 2113.9665 | 1.2962  | <a href="#">SELFVATGDGGDNHQNPQK</a>   |
| 6.4   | 2116.9809 | -1.7182 | <a href="#">TDILKYLCECQFDDNLK</a>     |
| 5.1   | 2116.0510 | -0.7883 | <a href="#">MELIVYTQDGTYSQSLLR</a>    |
| 3.3   | 2112.9845 | 2.2782  | <a href="#">AQMIQSGSSTSTSTVATEAEK</a> |
| 2.3   | 2117.0726 | -1.8099 | <a href="#">LTNGHGSAAGDLVHQERLSR</a>  |
| 1.1   | 2112.9746 | 2.2882  | <a href="#">MAPPSPTNSSSHSAAEQLSK</a>  |
| 0.8   | 2115.1589 | 0.1038  | <a href="#">LFEVDPNKPQKLGLHQR</a>     |

Mascot: <http://www.matrixscience.com/>

**MATRIX SCIENCE** Mascot Search Results

**Peptide View**

MS/MS Fragmentation of **SFLDAVNVIKPTAIGVSGAGR**

Found in [gi|57525624|ref|NP\\_001003627.1|](#), malic enzyme 2, NAD(+)-dependent, mitochondrial [Danio rerio]

Match to Query 63241: 2185.542724 from(1093.778638,2+) index(35756)

Data file TCDD\_0530.dta

Click mouse within plot area to zoom in by factor of two about that point

Or, Plot from  to  Da

Label all possible matches  Label matches used for scoring

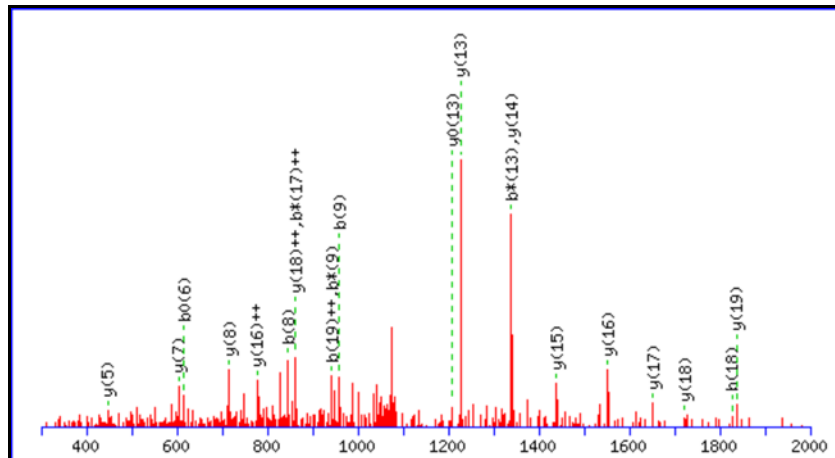

Monoisotopic mass of neutral peptide Mr(calc): 2184.2267

Ions Score: 54 Expect: 0.00081

Matches : 21/232 fragment ions using 34 most intense peaks ([help](#))

| #  | b         | b <sup>++</sup> | b <sup>*</sup> | b <sup>*++</sup> | b <sup>0</sup> | b <sup>0++</sup> | Seq. | y         | y <sup>++</sup> | y <sup>*</sup> | y <sup>*++</sup> | y <sup>0</sup> | y <sup>0++</sup> | #  |
|----|-----------|-----------------|----------------|------------------|----------------|------------------|------|-----------|-----------------|----------------|------------------|----------------|------------------|----|
| 1  | 88.0393   | 44.5233         |                |                  | 70.0287        | 35.5180          | S    |           |                 |                |                  |                |                  | 22 |
| 2  | 235.1077  | 118.0575        |                |                  | 217.0972       | 109.0522         | F    | 2098.2019 | 1049.6046       | 2081.1754      | 1041.0913        | 2080.1913      | 1040.5993        | 21 |
| 3  | 348.1918  | 174.5995        |                |                  | 330.1812       | 165.5942         | L    | 1951.1335 | 976.0704        | 1934.1069      | 967.5571         | 1933.1229      | 967.0651         | 20 |
| 4  | 463.2187  | 232.1130        |                |                  | 445.2082       | 223.1077         | D    | 1838.0494 | 919.5283        | 1821.0229      | 911.0151         | 1820.0389      | 910.5231         | 19 |
| 5  | 534.2558  | 267.6316        |                |                  | 516.2453       | 258.6263         | A    | 1723.0225 | 862.0149        | 1705.9959      | 853.5016         | 1705.0119      | 853.0096         | 18 |
| 6  | 633.3243  | 317.1658        |                |                  | 615.3137       | 308.1605         | V    | 1651.9854 | 826.4963        | 1634.9588      | 817.9830         | 1633.9748      | 817.4910         | 17 |
| 7  | 747.3672  | 374.1872        | 730.3406       | 365.6740         | 729.3566       | 365.1819         | N    | 1552.9170 | 776.9621        | 1535.8904      | 768.4488         | 1534.9064      | 767.9568         | 16 |
| 8  | 846.4356  | 423.7214        | 829.4090       | 415.2082         | 828.4250       | 414.7162         | V    | 1438.8740 | 719.9407        | 1421.8475      | 711.4274         | 1420.8635      | 710.9354         | 15 |
| 9  | 959.5197  | 480.2635        | 942.4931       | 471.7502         | 941.5091       | 471.2582         | I    | 1339.8056 | 670.4064        | 1322.7791      | 661.8932         | 1321.7950      | 661.4012         | 14 |
| 10 | 1087.6146 | 544.3109        | 1070.5881      | 535.7977         | 1069.6041      | 535.3057         | K    | 1226.7215 | 613.8644        | 1209.6950      | 605.3511         | 1208.7110      | 604.8591         | 13 |
| 11 | 1184.6674 | 592.8373        | 1167.6408      | 584.3241         | 1166.6568      | 583.8320         | P    | 1098.6266 | 549.8169        | 1081.6000      | 541.3037         | 1080.6160      | 540.8116         | 12 |
| 12 | 1285.7151 | 643.3612        | 1268.6885      | 634.8479         | 1267.7045      | 634.3559         | T    | 1001.5738 | 501.2905        | 984.5473       | 492.7773         | 983.5633       | 492.2853         | 11 |
| 13 | 1356.7522 | 678.8797        | 1339.7256      | 670.3665         | 1338.7416      | 669.8744         | A    | 900.5261  | 450.7667        | 883.4996       | 442.2534         | 882.5156       | 441.7614         | 10 |
| 14 | 1469.8362 | 735.4218        | 1452.8097      | 726.9085         | 1451.8257      | 726.4165         | I    | 829.4890  | 415.2482        | 812.4625       | 406.7349         | 811.4785       | 406.2429         | 9  |
| 15 | 1582.9203 | 791.9638        | 1565.8938      | 783.4505         | 1564.9097      | 782.9585         | I    | 716.4050  | 358.7061        | 699.3784       | 350.1928         | 698.3944       | 349.7008         | 8  |
| 16 | 1639.9418 | 820.4745        | 1622.9152      | 811.9612         | 1621.9312      | 811.4692         | G    | 603.3209  | 302.1641        | 586.2944       | 293.6508         | 585.3103       | 293.1588         | 7  |
| 17 | 1739.0102 | 870.0087        | 1721.9836      | 861.4955         | 1720.9996      | 861.0034         | V    | 546.2994  | 273.6534        | 529.2729       | 265.1401         | 528.2889       | 264.6481         | 6  |
| 18 | 1826.0422 | 913.5247        | 1809.0157      | 905.0115         | 1808.0316      | 904.5195         | S    | 447.2310  | 224.1191        | 430.2045       | 215.6059         | 429.2205       | 215.1139         | 5  |
| 19 | 1883.0637 | 942.0355        | 1866.0371      | 933.5222         | 1865.0531      | 933.0302         | G    | 360.1990  | 180.6031        | 343.1724       | 172.0899         |                |                  | 4  |
| 20 | 1954.1008 | 977.5540        | 1937.0742      | 969.0408         | 1936.0902      | 968.5488         | A    | 303.1775  | 152.0924        | 286.1510       | 143.5791         |                |                  | 3  |
| 21 | 2011.1223 | 1006.0648       | 1994.0957      | 997.5515         | 1993.1117      | 997.0595         | G    | 232.1404  | 116.5738        | 215.1139       | 108.0606         |                |                  | 2  |
| 22 |           |                 |                |                  |                |                  | R    | 175.1190  | 88.0631         | 158.0924       | 79.5498          |                |                  | 1  |

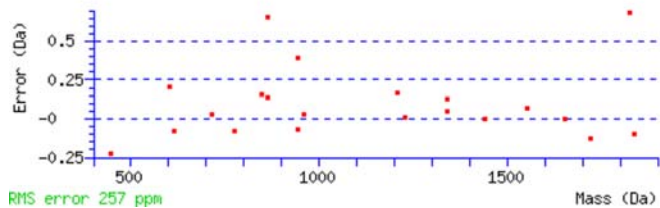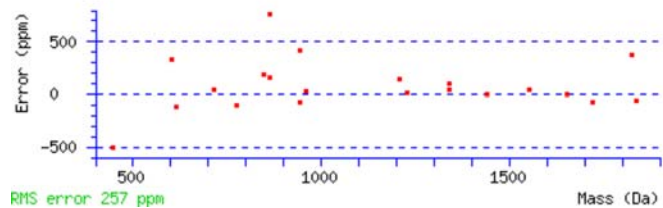

NCBI **BLAST** search of [SFLDAVNVIKPTAIIGVSGAGR](#)  
 (Parameters: blastp, nr protein database, expect=20000, no filter, PAM30)  
 Other BLAST [web gateways](#)

**All matches to this query**

| Score | Mr(calc): | Delta   | Sequence                               |
|-------|-----------|---------|----------------------------------------|
| 54.0  | 2184.2267 | 1.3161  | <a href="#">SFLDAVNVIKPTAIIGVSGAGR</a> |
| 8.3   | 2184.1031 | 1.4396  | <a href="#">IMDQAMLVGAPVIGLNDSSGAR</a> |
| 5.3   | 2187.9830 | -2.4403 | <a href="#">TFQVCNVMEYSQNNWLR</a>      |
| 4.7   | 2185.0175 | 0.5252  | <a href="#">NLDDIYTDLYVVENETGGR</a>    |
| 1.7   | 2186.0500 | -0.5073 | <a href="#">LDMFLDLLQSYRDL CER</a>     |

**Mascot:** <http://www.matrixscience.com/>

**MASCOT** SCIENCE Mascot Search Results

**Peptide View**

MS/MS Fragmentation of **SGTPTGFSHHHYTTNSGQPLHALPGLPGPPGPPDASISYGR**  
 Found in [gi|68448495|ref|NP\\_001020335.1](#), hypothetical protein LOC100003906 isoform 1 [Danio rerio]

Match to Query 172990: 4118.892723 from(1373.971517,3+) index(67406)  
 Data file TCDD\_0531.dta

Click mouse within plot area to zoom in by factor of two about that point

Or, Plot from  to  Da   
 Label all possible matches  Label matches used for scoring

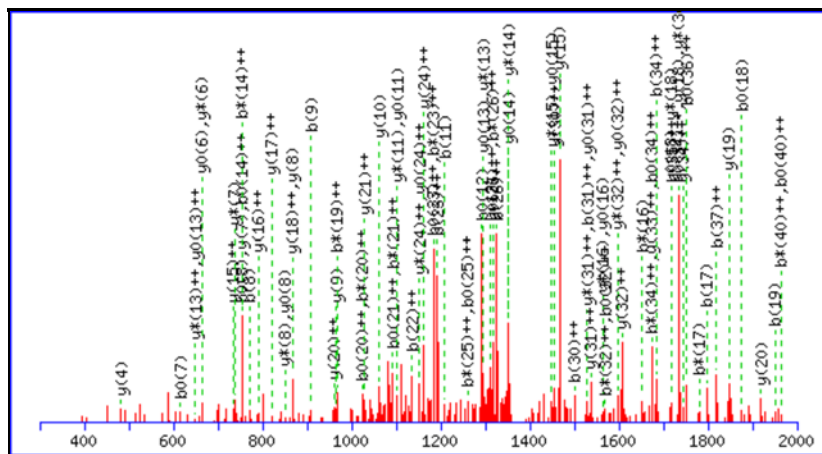

Monoisotopic mass of neutral peptide Mr(calc): 4117.9784  
 Ions Score: 43 Expect: 0.0032  
 Matches : 88/448 fragment ions using 136 most intense peaks ([help](#))

| #  | b                | b <sup>++</sup>  | b*               | b <sup>*++</sup> | b <sup>0</sup>   | b <sup>0++</sup> | Seq. | y                | y <sup>++</sup>  | y*               | y <sup>*++</sup> | y <sup>0</sup>   | y <sup>0++</sup> | #  |
|----|------------------|------------------|------------------|------------------|------------------|------------------|------|------------------|------------------|------------------|------------------|------------------|------------------|----|
| 1  | 88.0393          | 44.5233          |                  |                  | 70.0287          | 35.5180          | S    |                  |                  |                  |                  |                  |                  | 41 |
| 2  | 145.0608         | 73.0340          |                  |                  | 127.0502         | 64.0287          | G    | 4031.9536        | 2016.4804        | 4014.9270        | 2007.9672        | 4013.9430        | 2007.4751        | 40 |
| 3  | 246.1084         | 123.5579         |                  |                  | 228.0979         | 114.5526         | T    | 3974.9321        | 1987.9697        | 3957.9056        | 1979.4564        | 3956.9215        | 1978.9644        | 39 |
| 4  | 343.1612         | 172.0842         |                  |                  | 325.1506         | 163.0790         | P    | 3873.8844        | 1937.4459        | 3856.8579        | 1928.9326        | 3855.8739        | 1928.4406        | 38 |
| 5  | 400.1827         | 200.5950         |                  |                  | 382.1721         | 191.5897         | G    | 3776.8317        | 1888.9195        | 3759.8051        | 1880.4062        | 3758.8211        | 1879.9142        | 37 |
| 6  | 547.2511         | 274.1292         |                  |                  | 529.2405         | 265.1239         | F    | 3719.8102        | 1860.4087        | 3702.7837        | 1851.8955        | 3701.7996        | 1851.4035        | 36 |
| 7  | 634.2831         | 317.6452         |                  |                  | 616.2726         | 308.6399         | S    | 3572.7418        | 1786.8745        | 3555.7152        | 1778.3613        | 3554.7312        | 1777.8693        | 35 |
| 8  | <b>771.3420</b>  | 386.1747         |                  |                  | <b>753.3315</b>  | 377.1694         | H    | 3485.7098        | <b>1743.3585</b> | 3468.6832        | <b>1734.8452</b> | 3467.6992        | <b>1734.3532</b> | 34 |
| 9  | <b>908.4009</b>  | 454.7041         |                  |                  | 890.3904         | 445.6988         | H    | 3348.6509        | <b>1674.8291</b> | 3331.6243        | 1666.3158        | 3330.6403        | 1665.8238        | 33 |
| 10 | 1045.4599        | 523.2336         |                  |                  | 1027.4493        | 514.2283         | H    | 3211.5919        | <b>1606.2996</b> | 3194.5654        | <b>1597.7863</b> | 3193.5814        | <b>1597.2943</b> | 32 |
| 11 | <b>1208.5232</b> | 604.7652         |                  |                  | 1190.5126        | 595.7599         | Y    | 3074.5330        | <b>1537.7702</b> | 3057.5065        | <b>1529.2569</b> | 3056.5225        | <b>1528.7649</b> | 31 |
| 12 | 1309.5709        | 655.2891         |                  |                  | <b>1291.5603</b> | 646.2838         | T    | 2911.4697        | <b>1456.2385</b> | 2894.4432        | 1447.7252        | 2893.4591        | 1447.2332        | 30 |
| 13 | 1410.6185        | 705.8129         |                  |                  | 1392.6080        | 696.8076         | T    | 2810.4220        | 1405.7146        | 2793.3955        | 1397.2014        | 2792.4115        | 1396.7094        | 29 |
| 14 | 1524.6615        | 762.8344         | 1507.6349        | <b>754.3211</b>  | 1506.6509        | <b>753.8291</b>  | N    | 2709.3743        | 1355.1908        | 2692.3478        | 1346.6775        | 2691.3638        | 1346.1855        | 28 |
| 15 | 1611.6935        | 806.3504         | 1594.6669        | 797.8371         | 1593.6829        | 797.3451         | S    | 2595.3314        | 1298.1693        | 2578.3049        | 1289.6561        | 2577.3208        | 1289.1641        | 27 |
| 16 | 1668.7150        | 834.8611         | <b>1651.6884</b> | 826.3478         | 1650.7044        | 825.8558         | G    | 2508.2994        | 1254.6533        | 2491.2728        | 1246.1401        | 2490.2888        | 1245.6480        | 26 |
| 17 | <b>1796.7735</b> | 898.8904         | <b>1779.7470</b> | 890.3771         | 1778.7630        | 889.8851         | Q    | 2451.2779        | 1226.1426        | 2434.2514        | 1217.6293        | 2433.2674        | 1217.1373        | 25 |
| 18 | 1893.8263        | 947.4168         | 1876.7998        | 938.9035         | <b>1875.8157</b> | 938.4115         | P    | 2323.2193        | <b>1162.1133</b> | 2306.1928        | <b>1153.6000</b> | 2305.2088        | <b>1153.1080</b> | 24 |
| 19 | <b>1950.8478</b> | 975.9275         | 1933.8212        | <b>967.4142</b>  | 1932.8372        | 966.9222         | G    | 2226.1666        | 1113.5869        | 2209.1400        | 1105.0737        | 2208.1560        | 1104.5816        | 23 |
| 20 | 2063.9318        | 1032.4696        | 2046.9053        | <b>1023.9563</b> | 2045.9213        | <b>1023.4643</b> | L    | 2169.1451        | 1085.0762        | 2152.1186        | 1076.5629        | 2151.1346        | 1076.0709        | 22 |
| 21 | 2200.9907        | 1100.9990        | 2183.9642        | <b>1092.4857</b> | 2182.9802        | <b>1091.9937</b> | H    | 2056.0611        | <b>1028.5342</b> | 2039.0345        | 1020.0209        | 2038.0505        | 1019.5289        | 21 |
| 22 | 2272.0279        | <b>1136.5176</b> | 2255.0013        | 1128.0043        | 2254.0173        | 1127.5123        | A    | <b>1919.0021</b> | <b>960.0047</b>  | 1901.9756        | 951.4914         | 1900.9916        | 950.9994         | 20 |
| 23 | 2385.1119        | <b>1193.0596</b> | 2368.0854        | <b>1184.5463</b> | 2367.1014        | <b>1184.0543</b> | L    | <b>1847.9650</b> | 924.4862         | 1830.9385        | 915.9729         | 1829.9545        | 915.4809         | 19 |
| 24 | 2482.1647        | 1241.5860        | 2465.1381        | 1233.0727        | 2464.1541        | 1232.5807        | P    | <b>1734.8810</b> | <b>867.9441</b>  | <b>1717.8544</b> | 859.4308         | <b>1716.8704</b> | 858.9388         | 18 |

|    |           |           |           |           |           |           |   |           |          |           |          |           |          |    |
|----|-----------|-----------|-----------|-----------|-----------|-----------|---|-----------|----------|-----------|----------|-----------|----------|----|
| 25 | 2539.1861 | 1270.0967 | 2522.1596 | 1261.5834 | 2521.1756 | 1261.0914 | G | 1637.8282 | 819.4177 | 1620.8016 | 810.9045 | 1619.8176 | 810.4125 | 17 |
| 26 | 2652.2702 | 1326.6387 | 2635.2437 | 1318.1255 | 2634.2596 | 1317.6335 | L | 1580.8067 | 790.9070 | 1563.7802 | 782.3937 | 1562.7962 | 781.9017 | 16 |
| 27 | 2749.3230 | 1375.1651 | 2732.2964 | 1366.6519 | 2731.3124 | 1366.1598 | P | 1467.7227 | 734.3650 | 1450.6961 | 725.8517 | 1449.7121 | 725.3597 | 15 |
| 28 | 2806.3444 | 1403.6759 | 2789.3179 | 1395.1626 | 2788.3339 | 1394.6706 | G | 1370.6699 | 685.8386 | 1353.6434 | 677.3253 | 1352.6593 | 676.8333 | 14 |
| 29 | 2903.3972 | 1452.2022 | 2886.3707 | 1443.6890 | 2885.3866 | 1443.1970 | P | 1313.6484 | 657.3279 | 1296.6219 | 648.8146 | 1295.6379 | 648.3226 | 13 |
| 30 | 3000.4500 | 1500.7286 | 2983.4234 | 1492.2153 | 2982.4394 | 1491.7233 | P | 1216.5957 | 608.8015 | 1199.5691 | 600.2882 | 1198.5851 | 599.7962 | 12 |
| 31 | 3057.4714 | 1529.2394 | 3040.4449 | 1520.7261 | 3039.4609 | 1520.2341 | G | 1119.5429 | 560.2751 | 1102.5164 | 551.7618 | 1101.5323 | 551.2698 | 11 |
| 32 | 3154.5242 | 1577.7657 | 3137.4976 | 1569.2525 | 3136.5136 | 1568.7605 | P | 1062.5215 | 531.7644 | 1045.4949 | 523.2511 | 1044.5109 | 522.7591 | 10 |
| 33 | 3251.5770 | 1626.2921 | 3234.5504 | 1617.7788 | 3233.5664 | 1617.2868 | P | 965.4687  | 483.2380 | 948.4421  | 474.7247 | 947.4581  | 474.2327 | 9  |
| 34 | 3366.6039 | 1683.8056 | 3349.5774 | 1675.2923 | 3348.5933 | 1674.8003 | D | 868.4159  | 434.7116 | 851.3894  | 426.1983 | 850.4054  | 425.7063 | 8  |
| 35 | 3437.6410 | 1719.3241 | 3420.6145 | 1710.8109 | 3419.6305 | 1710.3189 | A | 753.3890  | 377.1981 | 736.3624  | 368.6849 | 735.3784  | 368.1928 | 7  |
| 36 | 3524.6730 | 1762.8402 | 3507.6465 | 1754.3269 | 3506.6625 | 1753.8349 | S | 682.3519  | 341.6796 | 665.3253  | 333.1663 | 664.3413  | 332.6743 | 6  |
| 37 | 3637.7571 | 1819.3822 | 3620.7306 | 1810.8689 | 3619.7465 | 1810.3769 | I | 595.3198  | 298.1636 | 578.2933  | 289.6503 | 577.3093  | 289.1583 | 5  |
| 38 | 3724.7891 | 1862.8982 | 3707.7626 | 1854.3849 | 3706.7786 | 1853.8929 | S | 482.2358  | 241.6215 | 465.2092  | 233.1083 | 464.2252  | 232.6162 | 4  |
| 39 | 3887.8525 | 1944.4299 | 3870.8259 | 1935.9166 | 3869.8419 | 1935.4246 | Y | 395.2037  | 198.1055 | 378.1772  | 189.5922 |           |          | 3  |
| 40 | 3944.8739 | 1972.9406 | 3927.8474 | 1964.4273 | 3926.8634 | 1963.9353 | G | 232.1404  | 116.5738 | 215.1139  | 108.0606 |           |          | 2  |
| 41 |           |           |           |           |           |           | R | 175.1190  | 88.0631  | 158.0924  | 79.5498  |           |          | 1  |

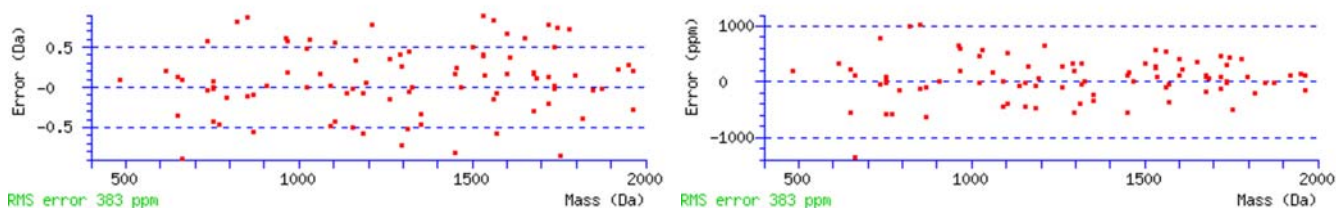

NCBI BLAST search of [SGTPGFSHHHYTTNSGQPLHALPGLPGPPGPPDASISYGR](#)

(Parameters: blastp, nr protein database, expect=20000, no filter, PAM30)

Other BLAST [web gateways](#)

#### All matches to this query

| Score | Mr(calc): | Delta   | Sequence                                                         |
|-------|-----------|---------|------------------------------------------------------------------|
| 43.0  | 4117.9784 | 0.9144  | <a href="#">SGTPGFSHHHYTTNSGQPLHALPGLPGPPGPPDASISYGR</a>         |
| 8.6   | 4119.7889 | -0.8961 | <a href="#">CFGPSICCGEGIGCLVGPETLRCLEEDFLPSPCEMSGK</a>           |
| 8.6   | 4119.8088 | -0.9161 | <a href="#">VQAFTGEEETGSSGGCDTTAPQRTLYTAVSDSDTEDPDVDR</a>        |
| 8.2   | 4117.1479 | 1.7448  | <a href="#">DINTVLLAVLMENGDVVVWQFSLPLNGKESVVCSTIK</a>            |
| 7.9   | 4119.9848 | -1.0921 | <a href="#">MSGAVATGGAQSAGLGAAAAGCCSSASGAGSAALLSAGSGIAGRLPSR</a> |
| 7.8   | 4119.9848 | -1.0921 | <a href="#">MSGAVATGGAQSAGLGAAAAGCCSSASGAGSAALLSAGSGIAGRLPSR</a> |
| 7.6   | 4119.7707 | -0.8780 | <a href="#">LTESGEPACHCQPGYSPTCETALTCEGEAVRDYLYR</a>             |
| 4.5   | 4119.7707 | -0.8780 | <a href="#">LTESGEPACHCQPGYSPTCETALTCEGEAVRDYLYR</a>             |
| 3.0   | 4117.1089 | 1.7838  | <a href="#">VPIDKPVVKIVSGNDHLVMLTAHGELYTSGCGEQQLGR</a>           |
| 2.1   | 4119.3468 | -0.4541 | <a href="#">SVKLVNINIPDILEGKPSIILGLIWTIILHCHVCVTR</a>            |

Mascot: <http://www.matrixscience.com/>

# MASCOT SCIENCE Mascot Search Results

## Peptide View

MS/MS Fragmentation of **SHIDELYANIK**

Found in [gi|57525836|ref|NP\\_001003569.1](#), hypothetical protein LOC445175 [Danio rerio]

Match to Query 17520: 1301.952724 from(1302.960000,1+) index(38927)

Data file TCDD\_0530.dta

Click mouse within plot area to zoom in by factor of two about that point

Or, Plot from  to  Da

Label all possible matches  Label matches used for scoring

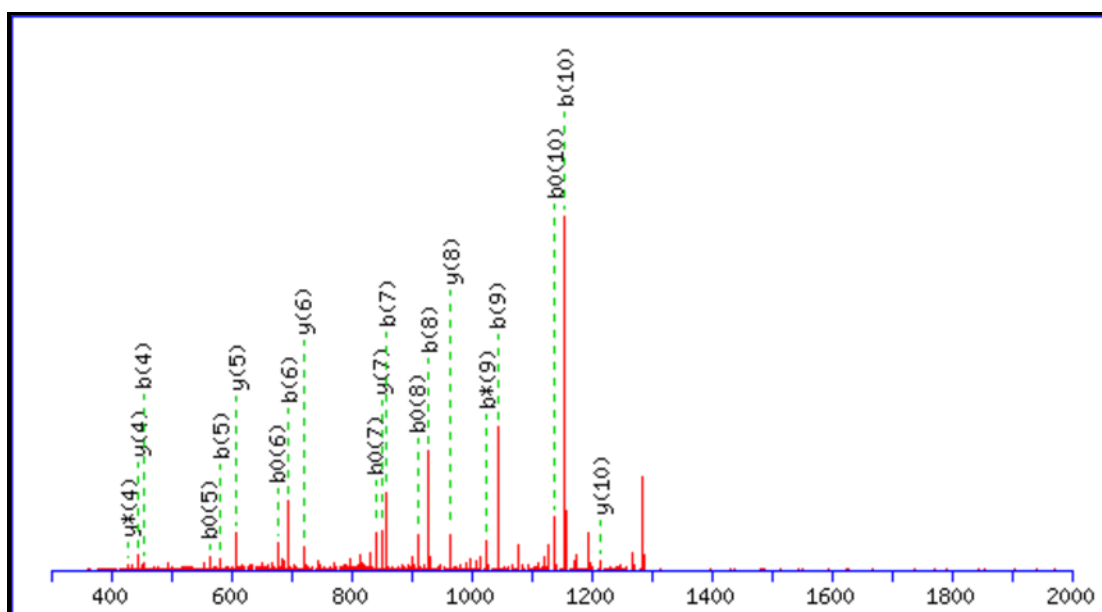

Monoisotopic mass of neutral peptide Mr(calc): 1301.6615

Ions Score: 60 Expect: 0.00032

Matches : 20/46 fragment ions using 30 most intense peaks ([help](#))

| #  | b         | b*        | b <sup>0</sup> | Seq. | y         | y*        | y <sup>0</sup> | #  |
|----|-----------|-----------|----------------|------|-----------|-----------|----------------|----|
| 1  | 88.0393   |           | 70.0287        | S    |           |           |                | 11 |
| 2  | 225.0982  |           | 207.0877       | H    | 1215.6368 | 1198.6103 | 1197.6262      | 10 |
| 3  | 338.1823  |           | 320.1717       | I    | 1078.5779 | 1061.5514 | 1060.5673      | 9  |
| 4  | 453.2092  |           | 435.1987       | D    | 965.4938  | 948.4673  | 947.4833       | 8  |
| 5  | 582.2518  |           | 564.2413       | E    | 850.4669  | 833.4403  | 832.4563       | 7  |
| 6  | 695.3359  |           | 677.3253       | L    | 721.4243  | 704.3978  |                | 6  |
| 7  | 858.3992  |           | 840.3886       | Y    | 608.3402  | 591.3137  |                | 5  |
| 8  | 929.4363  |           | 911.4258       | A    | 445.2769  | 428.2504  |                | 4  |
| 9  | 1043.4793 | 1026.4527 | 1025.4687      | N    | 374.2398  | 357.2132  |                | 3  |
| 10 | 1156.5633 | 1139.5368 | 1138.5527      | I    | 260.1969  | 243.1703  |                | 2  |

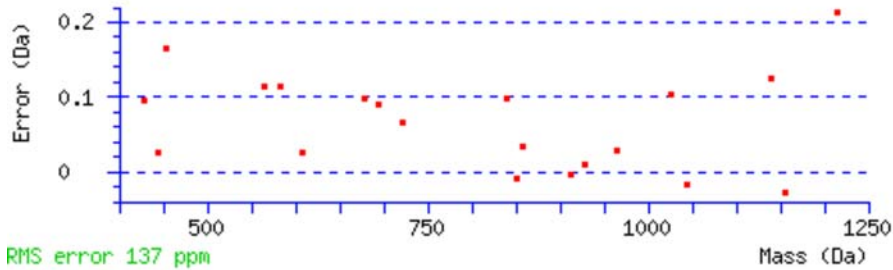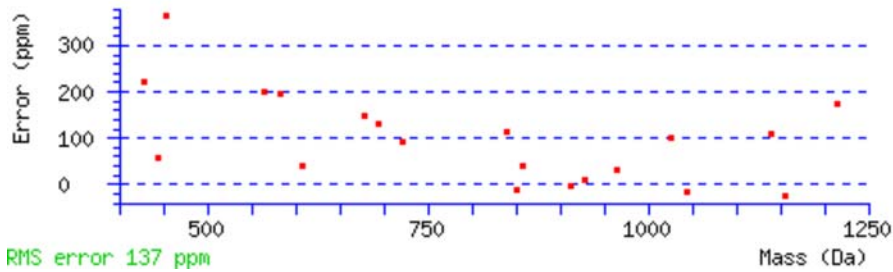

NCBI **BLAST** search of [SHIDELYANIK](#)

(Parameters: blastp, nr protein database, expect=20000, no filter, PAM30)

Other BLAST [web gateways](#)

**All matches to this query**

| Score | Mr(calc): | Delta   | Sequence                      |
|-------|-----------|---------|-------------------------------|
| 59.9  | 1301.6615 | 0.2912  | <a href="#">SHIDELYANIK</a>   |
| 17.4  | 1301.7568 | 0.1959  | <a href="#">QHLKIHTAGGLK</a>  |
| 12.9  | 1302.7296 | -0.7768 | <a href="#">FLKIAEVGAGGNK</a> |
| 12.7  | 1301.7125 | 0.2402  | <a href="#">KCAVVGNSGNLLK</a> |
| 10.5  | 1301.7667 | 0.1861  | <a href="#">RLSATSLSLNLK</a>  |
| 10.2  | 1301.6689 | 0.2838  | <a href="#">LYVMTSINFSK</a>   |
| 10.1  | 1302.6891 | -0.7364 | <a href="#">DSLRLRTATANNK</a> |
| 9.7   | 1302.6642 | -0.7115 | <a href="#">ECLAVVWALDK</a>   |
| 9.7   | 1302.6642 | -0.7115 | <a href="#">ECLAVVWAVEK</a>   |
| 9.6   | 1301.7377 | 0.2150  | <a href="#">NTMLAEVVGKLK</a>  |

**Mascot:** <http://www.matrixscience.com/>



**Peptide View**

MS/MS Fragmentation of **SHTWLFETQPLDNIK**

Found in [gi|59933260|ref|NP\\_001012377.1](#), cardiomyopathy associated 1 [Danio rerio]

Match to Query 36886: 1829.892724 from(915.953638,2+) index(46293)

Data file TCDD\_0530.dta

Click mouse within plot area to zoom in by factor of two about that point

Or, Plot from  to  Da

Label all possible matches  Label matches used for scoring

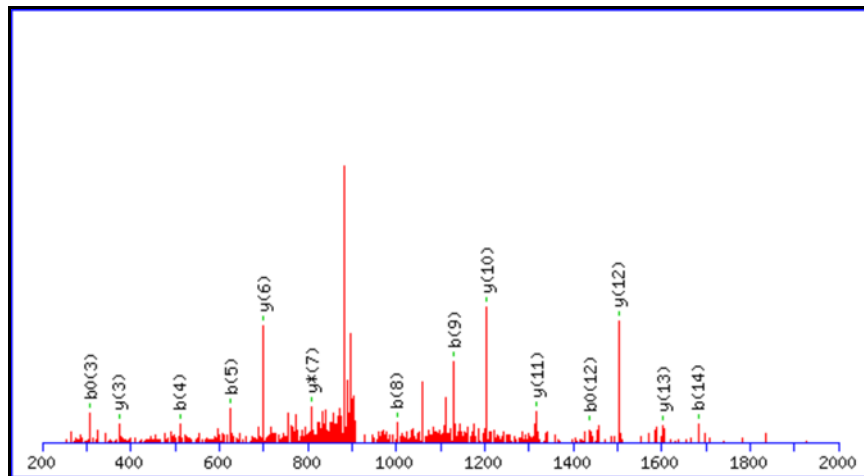

Monoisotopic mass of neutral peptide Mr(calc): 1827.9155

Ions Score: 51 Expect: 0.002

Matches : 14/146 fragment ions using 16 most intense peaks ([help](#))

| #  | b         | b <sup>++</sup> | b <sup>*</sup> | b <sup>***</sup> | b <sup>0</sup> | b <sup>0++</sup> | Seq. | y         | y <sup>++</sup> | y <sup>*</sup> | y <sup>***</sup> | y <sup>0</sup> | y <sup>0++</sup> | #  |
|----|-----------|-----------------|----------------|------------------|----------------|------------------|------|-----------|-----------------|----------------|------------------|----------------|------------------|----|
| 1  | 88.0393   | 44.5233         |                |                  | 70.0287        | 35.5180          | S    |           |                 |                |                  |                |                  | 15 |
| 2  | 225.0982  | 113.0527        |                |                  | 207.0877       | 104.0475         | H    | 1741.8908 | 871.4490        | 1724.8642      | 862.9358         | 1723.8802      | 862.4438         | 14 |
| 3  | 326.1459  | 163.5766        |                |                  | 308.1353       | 154.5713         | T    | 1604.8319 | 802.9196        | 1587.8053      | 794.4063         | 1586.8213      | 793.9143         | 13 |
| 4  | 512.2252  | 256.6162        |                |                  | 494.2146       | 247.6110         | W    | 1503.7842 | 752.3957        | 1486.7577      | 743.8825         | 1485.7736      | 743.3905         | 12 |
| 5  | 625.3093  | 313.1583        |                |                  | 607.2987       | 304.1530         | L    | 1317.7049 | 659.3561        | 1300.6783      | 650.8428         | 1299.6943      | 650.3508         | 11 |
| 6  | 772.3777  | 386.6925        |                |                  | 754.3671       | 377.6872         | F    | 1204.6208 | 602.8141        | 1187.5943      | 594.3008         | 1186.6103      | 593.8088         | 10 |
| 7  | 901.4203  | 451.2138        |                |                  | 883.4097       | 442.2085         | E    | 1057.5524 | 529.2798        | 1040.5259      | 520.7666         | 1039.5419      | 520.2746         | 9  |
| 8  | 1002.4680 | 501.7376        |                |                  | 984.4574       | 492.7323         | T    | 928.5098  | 464.7585        | 911.4833       | 456.2453         | 910.4993       | 455.7533         | 8  |
| 9  | 1130.5265 | 565.7669        | 1113.5000      | 557.2536         | 1112.5160      | 556.7616         | Q    | 827.4621  | 414.2347        | 810.4356       | 405.7214         | 809.4516       | 405.2294         | 7  |
| 10 | 1227.5793 | 614.2933        | 1210.5528      | 605.7800         | 1209.5687      | 605.2880         | P    | 699.4036  | 350.2054        | 682.3770       | 341.6921         | 681.3930       | 341.2001         | 6  |
| 11 | 1340.6634 | 670.8353        | 1323.6368      | 662.3220         | 1322.6528      | 661.8300         | L    | 602.3508  | 301.6790        | 585.3243       | 293.1658         | 584.3402       | 292.6738         | 5  |
| 12 | 1455.6903 | 728.3488        | 1438.6638      | 719.8355         | 1437.6797      | 719.3435         | D    | 489.2667  | 245.1370        | 472.2402       | 236.6237         | 471.2562       | 236.1317         | 4  |
| 13 | 1569.7332 | 785.3703        | 1552.7067      | 776.8570         | 1551.7227      | 776.3650         | N    | 374.2398  | 187.6235        | 357.2132       | 179.1103         |                |                  | 3  |
| 14 | 1682.8173 | 841.9123        | 1665.7907      | 833.3990         | 1664.8067      | 832.9070         | I    | 260.1969  | 130.6021        | 243.1703       | 122.0888         |                |                  | 2  |
| 15 |           |                 |                |                  |                |                  | K    | 147.1128  | 74.0600         | 130.0863       | 65.5468          |                |                  | 1  |



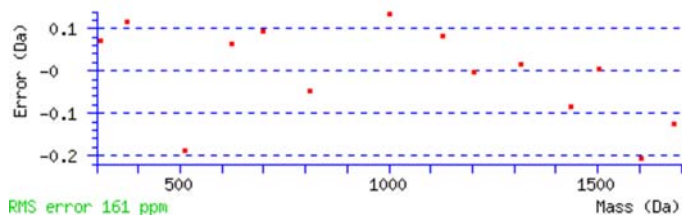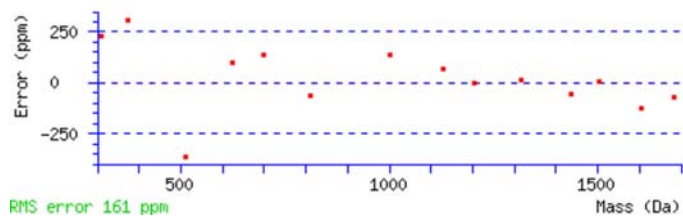

NCBI BLAST search of [SHTWLFETQPLDNIK](#)

(Parameters: blastp, nr protein database, expect=20000, no filter, PAM30)

Other BLAST [web gateways](#)

**All matches to this query**

| Score | Mr(calc): | Delta   | Sequence                          |
|-------|-----------|---------|-----------------------------------|
| 50.8  | 1827.9155 | 1.9772  | <a href="#">SHTWLFETQPLDNIK</a>   |
| 7.3   | 1827.9077 | 1.9850  | <a href="#">NAMGVGLVFEADLYTK</a>  |
| 4.8   | 1829.6808 | 0.2120  | <a href="#">CDPSCFNGSCWGTGPK</a>  |
| 1.6   | 1832.0495 | -2.1567 | <a href="#">AAAVRALGVYILFPCLR</a> |
| 0.2   | 1828.0054 | 1.8873  | <a href="#">TGPSEAVTQSILSVVGK</a> |
| 0.1   | 1827.9876 | 1.9051  | <a href="#">LAIAQMAQALLGSEERK</a> |

Mascot: <http://www.matrixscience.com/>

# MASCOT SCIENCE Mascot Search Results

## Peptide View

MS/MS Fragmentation of **SYGGAGALGGAGQGGIGGGPGR**  
 Found in [gi|114326248|ref|NP\\_001041529.1](#), elastin b [Danio rerio]

Match to Query 34118: 1775.192724 from(888.603638,2+) index(32312)  
 Data file TCDD\_0530.dta

Click mouse within plot area to zoom in by factor of two about that point

Or, Plot from  to  Da

Label all possible matches  Label matches used for scoring

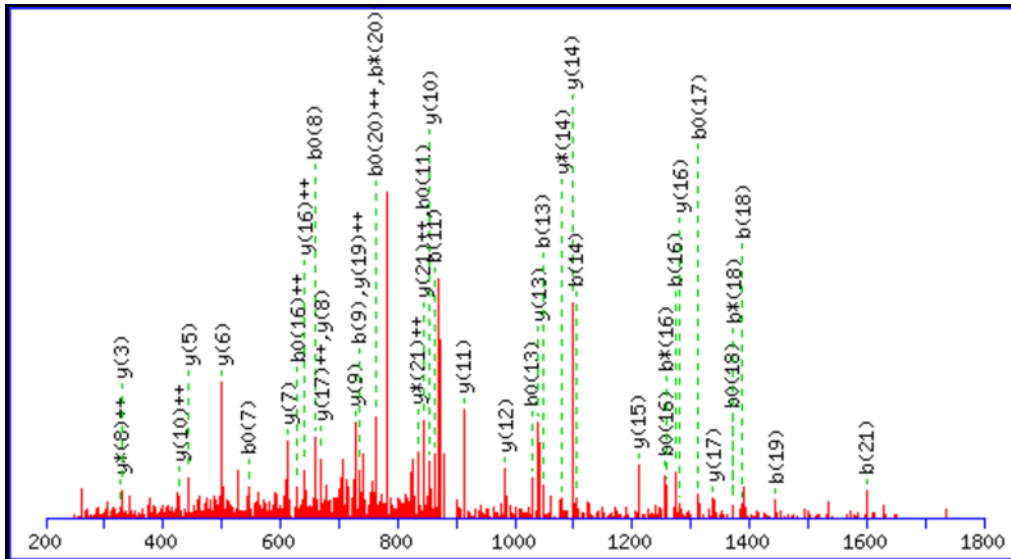

Monoisotopic mass of neutral peptide Mr(calc): 1772.8554

Ions Score: 52 Expect: 0.0015

Matches : 43/186 fragment ions using 114 most intense peaks ([help](#))

| #  | b         | b <sup>++</sup> | b <sup>*</sup> | b <sup>*++</sup> | b <sup>0</sup> | b <sup>0++</sup> | Seq. | y         | y <sup>++</sup> | y <sup>*</sup> | y <sup>*++</sup> | #  |
|----|-----------|-----------------|----------------|------------------|----------------|------------------|------|-----------|-----------------|----------------|------------------|----|
| 1  | 88.0393   | 44.5233         |                |                  | 70.0287        | 35.5180          | S    |           |                 |                |                  | 22 |
| 2  | 251.1026  | 126.0550        |                |                  | 233.0921       | 117.0497         | Y    | 1686.8307 | 843.9190        | 1669.8041      | 835.4057         | 21 |
| 3  | 308.1241  | 154.5657        |                |                  | 290.1135       | 145.5604         | G    | 1523.7673 | 762.3873        | 1506.7408      | 753.8740         | 20 |
| 4  | 365.1456  | 183.0764        |                |                  | 347.1350       | 174.0711         | G    | 1466.7459 | 733.8766        | 1449.7193      | 725.3633         | 19 |
| 5  | 436.1827  | 218.5950        |                |                  | 418.1721       | 209.5897         | A    | 1409.7244 | 705.3658        | 1392.6979      | 696.8526         | 18 |
| 6  | 493.2041  | 247.1057        |                |                  | 475.1936       | 238.1004         | G    | 1338.6873 | 669.8473        | 1321.6607      | 661.3340         | 17 |
| 7  | 564.2413  | 282.6243        |                |                  | 546.2307       | 273.6190         | A    | 1281.6658 | 641.3366        | 1264.6393      | 632.8233         | 16 |
| 8  | 677.3253  | 339.1663        |                |                  | 659.3148       | 330.1610         | L    | 1210.6287 | 605.8180        | 1193.6022      | 597.3047         | 15 |
| 9  | 734.3468  | 367.6770        |                |                  | 716.3362       | 358.6717         | G    | 1097.5446 | 549.2760        | 1080.5181      | 540.7627         | 14 |
| 10 | 791.3682  | 396.1878        |                |                  | 773.3577       | 387.1825         | G    | 1040.5232 | 520.7652        | 1023.4966      | 512.2520         | 13 |
| 11 | 862.4054  | 431.7063        |                |                  | 844.3948       | 422.7010         | A    | 983.5017  | 492.2545        | 966.4752       | 483.7412         | 12 |
| 12 | 919.4268  | 460.2170        |                |                  | 901.4163       | 451.2118         | G    | 912.4646  | 456.7359        | 895.4381       | 448.2227         | 11 |
| 13 | 1047.4854 | 524.2463        | 1030.4589      | 515.7331         | 1029.4748      | 515.2411         | Q    | 855.4431  | 428.2252        | 838.4166       | 419.7119         | 10 |
| 14 | 1104.5069 | 552.7571        | 1087.4803      | 544.2438         | 1086.4963      | 543.7518         | G    | 727.3846  | 364.1959        | 710.3580       | 355.6826         | 9  |

|    |           |          |           |          |           |          |   |          |          |          |          |   |
|----|-----------|----------|-----------|----------|-----------|----------|---|----------|----------|----------|----------|---|
| 15 | 1161.5283 | 581.2678 | 1144.5018 | 572.7545 | 1143.5178 | 572.2625 | G | 670.3631 | 335.6852 | 653.3366 | 327.1719 | 8 |
| 16 | 1274.6124 | 637.8098 | 1257.5858 | 629.2966 | 1256.6018 | 628.8046 | I | 613.3416 | 307.1745 | 596.3151 | 298.6612 | 7 |
| 17 | 1331.6339 | 666.3206 | 1314.6073 | 657.8073 | 1313.6233 | 657.3153 | G | 500.2576 | 250.6324 | 483.2310 | 242.1191 | 6 |
| 18 | 1388.6553 | 694.8313 | 1371.6288 | 686.3180 | 1370.6448 | 685.8260 | G | 443.2361 | 222.1217 | 426.2096 | 213.6084 | 5 |
| 19 | 1445.6768 | 723.3420 | 1428.6502 | 714.8288 | 1427.6662 | 714.3367 | G | 386.2146 | 193.6110 | 369.1881 | 185.0977 | 4 |
| 20 | 1542.7295 | 771.8684 | 1525.7030 | 763.3551 | 1524.7190 | 762.8631 | P | 329.1932 | 165.1002 | 312.1666 | 156.5870 | 3 |
| 21 | 1599.7510 | 800.3791 | 1582.7245 | 791.8659 | 1581.7404 | 791.3739 | G | 232.1404 | 116.5738 | 215.1139 | 108.0606 | 2 |
| 22 |           |          |           |          |           |          | R | 175.1190 | 88.0631  | 158.0924 | 79.5498  | 1 |

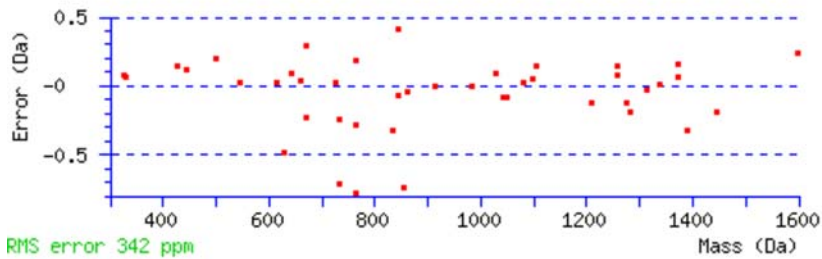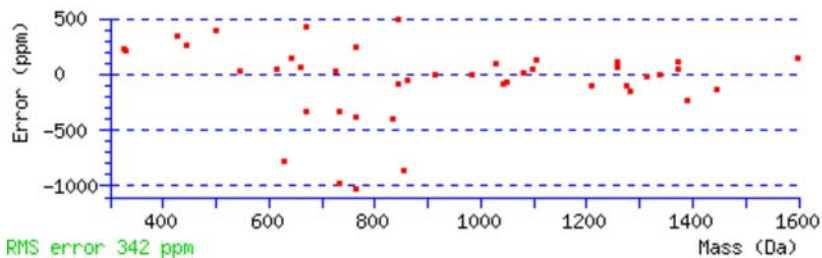

NCBI **BLAST** search of [SYGGAGALGGAGQGGIGGGPGR](#)  
 (Parameters: blastp, nr protein database, expect=20000, no filter, PAM30)  
 Other BLAST [web gateways](#)

**All matches to this query**

| Score | Mr(calc): | Delta   | Sequence                               |
|-------|-----------|---------|----------------------------------------|
| 52.4  | 1772.8554 | 2.3373  | <a href="#">SYGGAGALGGAGQGGIGGGPGR</a> |
| 7.0   | 1772.7280 | 2.4647  | <a href="#">CISAAYVCDGINDCR</a>        |
| 4.2   | 1775.8723 | -0.6796 | <a href="#">LEEAGGATSAQIEMNKK</a>      |
| 3.3   | 1773.8356 | 1.3572  | <a href="#">NSLKSyvLSNDECFR</a>        |
| 3.2   | 1773.8931 | 1.2996  | <a href="#">ITDLAIVGEAGQCGKDK</a>      |
| 3.1   | 1772.8904 | 2.3023  | <a href="#">ILESGKLETEQGEGR</a>        |
| 2.4   | 1774.8836 | 0.3091  | <a href="#">TVQELVSDLLSAEDEK</a>       |
| 2.2   | 1772.9420 | 2.2507  | <a href="#">NALSNIGIDKAYLEIPR</a>      |
| 1.0   | 1776.7261 | -1.5334 | <a href="#">NQTDTFADFDTMTR</a>         |
| 1.0   | 1773.8390 | 1.3538  | <a href="#">DPKVTSDEVCGCPLVR</a>       |

**Mascot:** <http://www.matrixscience.com/>

**MASCOT** SCIENCE Mascot Search Results

**Peptide View**

MS/MS Fragmentation of **SYHSPWEEAHNDPTLADTLK**  
 Found in [gi|41053611|ref|NP\\_957148.1](#), hypothetical protein LOC393828 [Danio rerio]

Match to Query 85634: 2398.672724 from(1200.343638,2+) index(119595)  
 Data file TCDD\_0530.dta

Click mouse within plot area to zoom in by factor of two about that point

Or, Plot from  to  Da   
 Label all possible matches  Label matches used for scoring

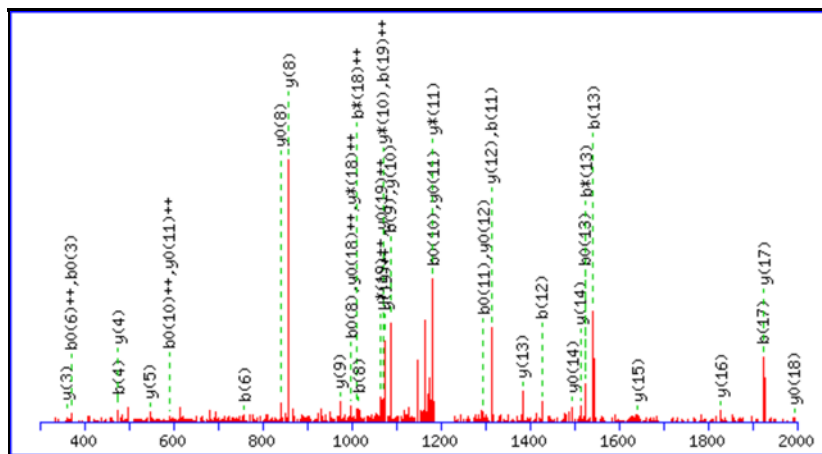

Monoisotopic mass of neutral peptide Mr(calc): 2399.1645  
 Ions Score: 56 Expect: 0.00041  
 Matches : 43/214 fragment ions using 68 most intense peaks ([help](#))

| #  | b         | b <sup>++</sup> | b*        | b <sup>*++</sup> | b <sup>0</sup> | b <sup>0++</sup> | Seq. | y         | y <sup>++</sup> | y*        | y <sup>*++</sup> | y <sup>0</sup> | y <sup>0++</sup> | #  |
|----|-----------|-----------------|-----------|------------------|----------------|------------------|------|-----------|-----------------|-----------|------------------|----------------|------------------|----|
| 1  | 88.0393   | 44.5233         |           |                  | 70.0287        | 35.5180          | S    |           |                 |           |                  |                |                  | 21 |
| 2  | 251.1026  | 126.0550        |           |                  | 233.0921       | 117.0497         | Y    | 2313.1398 | 1157.0735       | 2296.1132 | 1148.5602        | 2295.1292      | 1148.0682        | 20 |
| 3  | 388.1615  | 194.5844        |           |                  | 370.1510       | 185.5791         | H    | 2150.0764 | 1075.5419       | 2133.0499 | 1067.0286        | 2132.0659      | 1066.5366        | 19 |
| 4  | 475.1936  | 238.1004        |           |                  | 457.1830       | 229.0951         | S    | 2013.0175 | 1007.0124       | 1995.9910 | 998.4991         | 1995.0069      | 998.0071         | 18 |
| 5  | 572.2463  | 286.6268        |           |                  | 554.2358       | 277.6215         | P    | 1925.9855 | 963.4964        | 1908.9589 | 954.9831         | 1907.9749      | 954.4911         | 17 |
| 6  | 758.3257  | 379.6665        |           |                  | 740.3151       | 370.6612         | W    | 1828.9327 | 914.9700        | 1811.9062 | 906.4567         | 1810.9222      | 905.9647         | 16 |
| 7  | 887.3682  | 444.1878        |           |                  | 869.3577       | 435.1825         | E    | 1642.8534 | 821.9303        | 1625.8269 | 813.4171         | 1624.8428      | 812.9251         | 15 |
| 8  | 1016.4108 | 508.7091        |           |                  | 998.4003       | 499.7038         | E    | 1513.8108 | 757.4090        | 1496.7843 | 748.8958         | 1495.8003      | 748.4038         | 14 |
| 9  | 1087.4480 | 544.2276        |           |                  | 1069.4374      | 535.2223         | A    | 1384.7682 | 692.8877        | 1367.7417 | 684.3745         | 1366.7577      | 683.8825         | 13 |
| 10 | 1200.5320 | 600.7696        |           |                  | 1182.5214      | 591.7644         | I    | 1313.7311 | 657.3692        | 1296.7046 | 648.8559         | 1295.7205      | 648.3639         | 12 |
| 11 | 1313.6161 | 657.3117        |           |                  | 1295.6055      | 648.3064         | I    | 1200.6470 | 600.8272        | 1183.6205 | 592.3139         | 1182.6365      | 591.8219         | 11 |
| 12 | 1427.6590 | 714.3331        | 1410.6325 | 705.8199         | 1409.6484      | 705.3279         | N    | 1087.5630 | 544.2851        | 1070.5364 | 535.7719         | 1069.5524      | 535.2798         | 10 |
| 13 | 1542.6859 | 771.8466        | 1525.6594 | 763.3333         | 1524.6754      | 762.8413         | D    | 973.5201  | 487.2637        | 956.4935  | 478.7504         | 955.5095       | 478.2584         | 9  |
| 14 | 1639.7387 | 820.3730        | 1622.7122 | 811.8597         | 1621.7281      | 811.3677         | P    | 858.4931  | 429.7502        | 841.4666  | 421.2369         | 840.4825       | 420.7449         | 8  |
| 15 | 1740.7864 | 870.8968        | 1723.7598 | 862.3836         | 1722.7758      | 861.8916         | T    | 761.4403  | 381.2238        | 744.4138  | 372.7105         | 743.4298       | 372.2185         | 7  |
| 16 | 1853.8705 | 927.4389        | 1836.8439 | 918.9256         | 1835.8599      | 918.4336         | L    | 660.3927  | 330.7000        | 643.3661  | 322.1867         | 642.3821       | 321.6947         | 6  |
| 17 | 1924.9076 | 962.9574        | 1907.8810 | 954.4441         | 1906.8970      | 953.9521         | A    | 547.3086  | 274.1579        | 530.2821  | 265.6447         | 529.2980       | 265.1527         | 5  |
| 18 | 2039.9345 | 1020.4709       | 2022.9080 | 1011.9576        | 2021.9239      | 1011.4656        | D    | 476.2715  | 238.6394        | 459.2449  | 230.1261         | 458.2609       | 229.6341         | 4  |
| 19 | 2140.9822 | 1070.9947       | 2123.9556 | 1062.4815        | 2122.9716      | 1061.9895        | T    | 361.2445  | 181.1259        | 344.2180  | 172.6126         | 343.2340       | 172.1206         | 3  |
| 20 | 2254.0663 | 1127.5368       | 2237.0397 | 1119.0235        | 2236.0557      | 1118.5315        | L    | 260.1969  | 130.6021        | 243.1703  | 122.0888         |                |                  | 2  |
| 21 |           |                 |           |                  |                |                  | K    | 147.1128  | 74.0600         | 130.0863  | 65.5468          |                |                  | 1  |

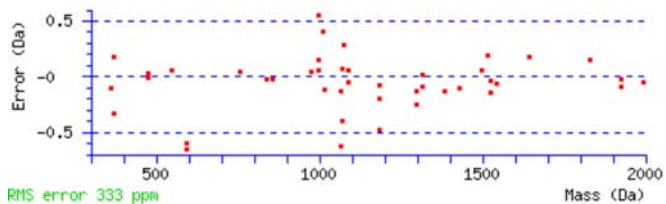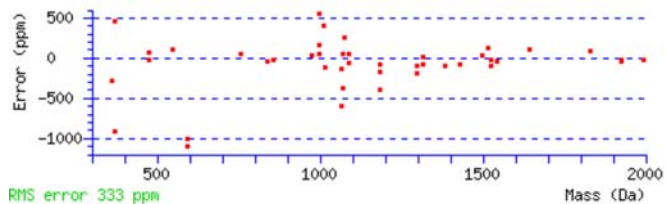

NCBI BLAST search of [SYHSPWEEAIINDPTLADTLK](#)

(Parameters: blastp, nr protein database, expect=20000, no filter, PAM30)

Other BLAST [web gateways](#)

**All matches to this query**

| Score | Mr(calc): | Delta   | Sequence                                |
|-------|-----------|---------|-----------------------------------------|
| 56.2  | 2399.1645 | -0.4918 | <a href="#">SYHSPWEEAIINDPTLADTLK</a>   |
| 4.6   | 2400.0396 | -1.3669 | <a href="#">LPRDCGCDLAEDTLDPAAMSPP</a>  |
| 3.4   | 2398.2712 | 0.4015  | <a href="#">TLNMVPTLRVEDCSIALLP</a>     |
| 2.5   | 2398.2137 | 0.4590  | <a href="#">LIQFLFSQMSPSTVGMKR</a>      |
| 0.5   | 2397.2470 | 1.4257  | <a href="#">LCKPQISDVIVDPMCGTGAIPLK</a> |

**Mascot:** <http://www.matrixscience.com/>

**MATRIX SCIENCE Mascot Search Results**

**Peptide View**

MS/MS Fragmentation of **TFLVIPELAQELHVWTDK**

Found in [gi|121583986|ref|NP\\_001073435.1](#), hypothetical protein LOC557972 [Danio rerio]

Match to Query 57897: 2140.482724 from(1071.248638,2+) index(38206)

Data file TCDD\_0530.dta

Click mouse within plot area to zoom in by factor of two about that point

Or, Plot from  to  Da

Label all possible matches  Label matches used for scoring

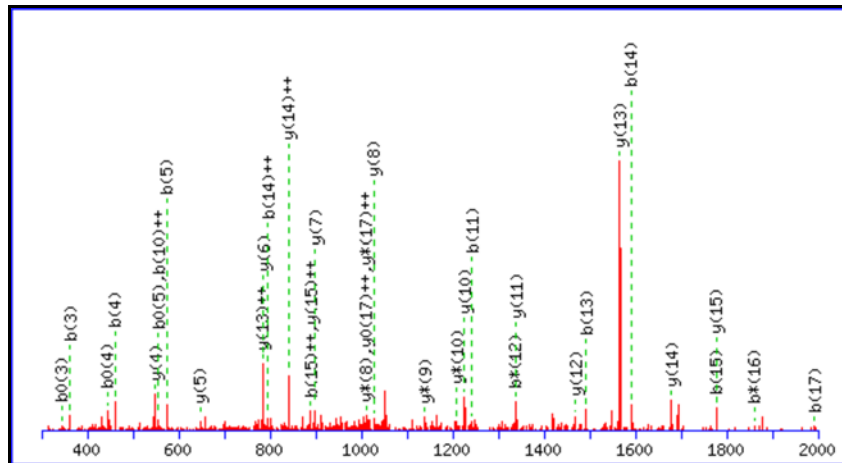

Monoisotopic mass of neutral peptide  $M_r(\text{calc})$ : 2138.1412

Ions Score: 48 Expect: 0.0033

Matches : 35/184 fragment ions using 68 most intense peaks ([help](#))

| #  | b         | b <sup>++</sup> | b*        | b <sup>*++</sup> | b <sup>0</sup> | b <sup>0++</sup> | Seq. | y         | y <sup>++</sup> | y*        | y <sup>*++</sup> | y <sup>0</sup> | y <sup>0++</sup> | #  |
|----|-----------|-----------------|-----------|------------------|----------------|------------------|------|-----------|-----------------|-----------|------------------|----------------|------------------|----|
| 1  | 102.0550  | 51.5311         |           |                  | 84.0444        | 42.5258          | T    |           |                 |           |                  |                |                  | 18 |
| 2  | 249.1234  | 125.0653        |           |                  | 231.1128       | 116.0600         | F    | 2038.1008 | 1019.5540       | 2021.0742 | 1011.0408        | 2020.0902      | 1010.5488        | 17 |
| 3  | 362.2074  | 181.6074        |           |                  | 344.1969       | 172.6021         | L    | 1891.0324 | 946.0198        | 1874.0058 | 937.5066         | 1873.0218      | 937.0145         | 16 |
| 4  | 461.2758  | 231.1416        |           |                  | 443.2653       | 222.1363         | V    | 1777.9483 | 889.4778        | 1760.9218 | 880.9645         | 1759.9377      | 880.4725         | 15 |
| 5  | 574.3599  | 287.6836        |           |                  | 556.3493       | 278.6783         | I    | 1678.8799 | 839.9436        | 1661.8534 | 831.4303         | 1660.8693      | 830.9383         | 14 |
| 6  | 671.4127  | 336.2100        |           |                  | 653.4021       | 327.2047         | P    | 1565.7958 | 783.4016        | 1548.7693 | 774.8883         | 1547.7853      | 774.3963         | 13 |
| 7  | 800.4553  | 400.7313        |           |                  | 782.4447       | 391.7260         | E    | 1468.7431 | 734.8752        | 1451.7165 | 726.3619         | 1450.7325      | 725.8699         | 12 |
| 8  | 913.5393  | 457.2733        |           |                  | 895.5288       | 448.2680         | L    | 1339.7005 | 670.3539        | 1322.6739 | 661.8406         | 1321.6899      | 661.3486         | 11 |
| 9  | 984.5764  | 492.7919        |           |                  | 966.5659       | 483.7866         | A    | 1226.6164 | 613.8118        | 1209.5899 | 605.2986         | 1208.6058      | 604.8066         | 10 |
| 10 | 1112.6350 | 556.8211        | 1095.6085 | 548.3079         | 1094.6245      | 547.8159         | Q    | 1155.5793 | 578.2933        | 1138.5528 | 569.7800         | 1137.5687      | 569.2880         | 9  |
| 11 | 1241.6776 | 621.3424        | 1224.6511 | 612.8292         | 1223.6671      | 612.3372         | E    | 1027.5207 | 514.2640        | 1010.4942 | 505.7507         | 1009.5102      | 505.2587         | 8  |
| 12 | 1354.7617 | 677.8845        | 1337.7351 | 669.3712         | 1336.7511      | 668.8792         | L    | 898.4781  | 449.7427        | 881.4516  | 441.2294         | 880.4676       | 440.7374         | 7  |
| 13 | 1491.8206 | 746.4139        | 1474.7940 | 737.9007         | 1473.8100      | 737.4087         | H    | 785.3941  | 393.2007        | 768.3675  | 384.6874         | 767.3835       | 384.1954         | 6  |
| 14 | 1590.8890 | 795.9481        | 1573.8625 | 787.4349         | 1572.8784      | 786.9429         | V    | 648.3352  | 324.6712        | 631.3086  | 316.1579         | 630.3246       | 315.6659         | 5  |
| 15 | 1776.9683 | 888.9878        | 1759.9418 | 880.4745         | 1758.9578      | 879.9825         | W    | 549.2667  | 275.1370        | 532.2402  | 266.6237         | 531.2562       | 266.1317         | 4  |
| 16 | 1878.0160 | 939.5116        | 1860.9895 | 930.9984         | 1860.0054      | 930.5064         | T    | 363.1874  | 182.0974        | 346.1609  | 173.5841         | 345.1769       | 173.0921         | 3  |
| 17 | 1993.0429 | 997.0251        | 1976.0164 | 988.5118         | 1975.0324      | 988.0198         | D    | 262.1397  | 131.5735        | 245.1132  | 123.0602         | 244.1292       | 122.5682         | 2  |
| 18 |           |                 |           |                  |                |                  | K    | 147.1128  | 74.0600         | 130.0863  | 65.5468          |                |                  | 1  |

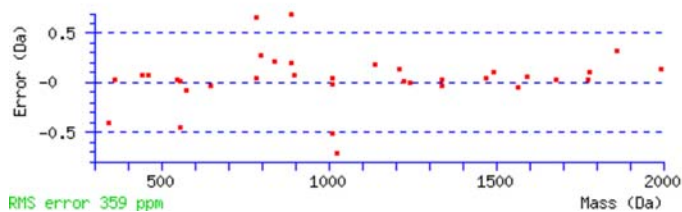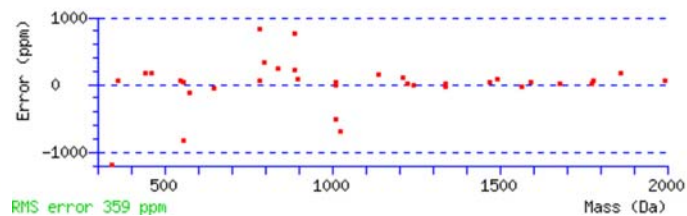

NCBI **BLAST** search of [TFLVIPELAQELHVWTDK](#)  
 (Parameters: blastp, nr protein database, expect=20000, no filter, PAM30)  
 Other BLAST [web gateways](#)

**All matches to this query**

| Score | Mr(calc): | Delta  | Sequence                              |
|-------|-----------|--------|---------------------------------------|
| 48.0  | 2138.1412 | 2.3415 | <a href="#">TFLVIPELAQELHVWTDK</a>    |
| 8.3   | 2139.9669 | 0.5159 | <a href="#">GVEGRSSQNSEAEVSGDAFK</a>  |
| 6.4   | 2139.1106 | 1.3721 | <a href="#">ENPINRDIIVLTVMALDGGGR</a> |
| 5.3   | 2139.1510 | 1.3317 | <a href="#">LREILVPGSVQWMGLQGEK</a>   |
| 5.2   | 2139.1535 | 1.3292 | <a href="#">ELSVQGLTQISLSLHTASQK</a>  |
| 4.3   | 2139.0881 | 1.3946 | <a href="#">YAMKGAGTTEDTLIEILASR</a>  |
| 4.0   | 2139.0668 | 1.4159 | <a href="#">RPLLAENGSINSQQGDVDAR</a>  |
| 3.9   | 2138.0855 | 2.3972 | <a href="#">HSTEVDINTTLQLLGSPGEK</a>  |
| 2.8   | 2138.9473 | 1.5354 | <a href="#">CLMDEHKNHEAVTAEAEK</a>    |
| 2.5   | 2140.0477 | 0.4350 | <a href="#">FNADDGVYEKVVTEWLQK</a>    |

Mascot: <http://www.matrixscience.com/>



# MASCOT SCIENCE Mascot Search Results

## Peptide View

MS/MS Fragmentation of **TFVQESIYDEFVER**

Found in [gi|51571951|ref|NP\\_998466.2](#), aldehyde dehydrogenase 2b [Danio rerio]

Match to Query 33260: 1761.192724 from(881.603638,2+) index(14670)

Data file TCDD\_0530.dta

Click mouse within plot area to zoom in by factor of two about that point

Or, Plot from  to  Da

Label all possible matches  Label matches used for scoring

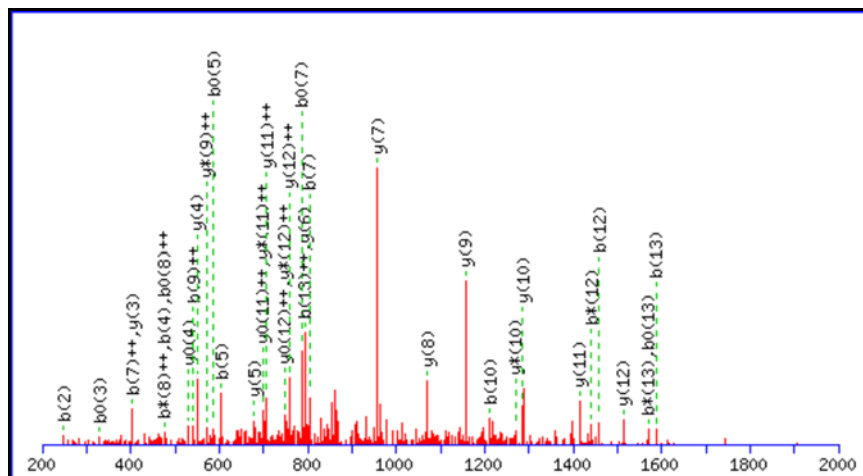

Monoisotopic mass of neutral peptide Mr(calc): 1760.8257

Ions Score: 55 Expect: 0.00092

Matches : 37/148 fragment ions using 57 most intense peaks ([help](#))

| #  | b                | b <sup>++</sup> | b <sup>*</sup>   | b <sup>*++</sup> | b <sup>0</sup>   | b <sup>0++</sup> | Seq. | y                | y <sup>++</sup> | y <sup>*</sup>   | y <sup>*++</sup> | y <sup>0</sup>  | y <sup>0++</sup> | #  |
|----|------------------|-----------------|------------------|------------------|------------------|------------------|------|------------------|-----------------|------------------|------------------|-----------------|------------------|----|
| 1  | 102.0550         | 51.5311         |                  |                  | 84.0444          | 42.5258          | T    |                  |                 |                  |                  |                 |                  | 14 |
| 2  | <b>249.1234</b>  | 125.0653        |                  |                  | 231.1128         | 116.0600         | F    | 1660.7853        | 830.8963        | 1643.7588        | 822.3830         | 1642.7748       | 821.8910         | 13 |
| 3  | 348.1918         | 174.5995        |                  |                  | <b>330.1812</b>  | 165.5942         | V    | <b>1513.7169</b> | <b>757.3621</b> | 1496.6904        | <b>748.8488</b>  | 1495.7064       | <b>748.3568</b>  | 12 |
| 4  | <b>476.2504</b>  | 238.6288        | 459.2238         | 230.1155         | 458.2398         | 229.6235         | Q    | <b>1414.6485</b> | <b>707.8279</b> | 1397.6220        | <b>699.3146</b>  | 1396.6379       | <b>698.8226</b>  | 11 |
| 5  | <b>605.2930</b>  | 303.1501        | 588.2664         | 294.6368         | <b>587.2824</b>  | 294.1448         | E    | <b>1286.5899</b> | 643.7986        | <b>1269.5634</b> | 635.2853         | 1268.5794       | 634.7933         | 10 |
| 6  | 692.3250         | 346.6661        | 675.2984         | 338.1529         | 674.3144         | 337.6608         | S    | <b>1157.5473</b> | 579.2773        | 1140.5208        | <b>570.7640</b>  | 1139.5368       | 570.2720         | 9  |
| 7  | <b>805.4090</b>  | <b>403.2082</b> | 788.3825         | 394.6949         | <b>787.3985</b>  | 394.2029         | I    | <b>1070.5153</b> | 535.7613        | 1053.4888        | 527.2480         | 1052.5047       | 526.7560         | 8  |
| 8  | 968.4724         | 484.7398        | 951.4458         | <b>476.2266</b>  | 950.4618         | <b>475.7345</b>  | Y    | <b>957.4312</b>  | 479.2193        | 940.4047         | 470.7060         | 939.4207        | 470.2140         | 7  |
| 9  | 1083.4993        | <b>542.2533</b> | 1066.4728        | 533.7400         | 1065.4888        | 533.2480         | D    | <b>794.3679</b>  | 397.6876        | 777.3414         | 389.1743         | 776.3573        | 388.6823         | 6  |
| 10 | <b>1212.5419</b> | 606.7746        | 1195.5154        | 598.2613         | 1194.5313        | 597.7693         | E    | <b>679.3410</b>  | 340.1741        | 662.3144         | 331.6608         | 661.3304        | 331.1688         | 5  |
| 11 | 1359.6103        | 680.3088        | 1342.5838        | 671.7955         | 1341.5998        | 671.3035         | F    | <b>550.2984</b>  | 275.6528        | 533.2718         | 267.1396         | <b>532.2878</b> | 266.6475         | 4  |
| 12 | <b>1458.6787</b> | 729.8430        | <b>1441.6522</b> | 721.3297         | 1440.6682        | 720.8377         | V    | <b>403.2300</b>  | 202.1186        | 386.2034         | 193.6053         | 385.2194        | 193.1133         | 3  |
| 13 | <b>1587.7213</b> | <b>794.3643</b> | <b>1570.6948</b> | 785.8510         | <b>1569.7108</b> | 785.3590         | E    | 304.1615         | 152.5844        | 287.1350         | 144.0711         | 286.1510        | 143.5791         | 2  |
| 14 |                  |                 |                  |                  |                  |                  | R    | 175.1190         | 88.0631         | 158.0924         | 79.5498          |                 |                  | 1  |

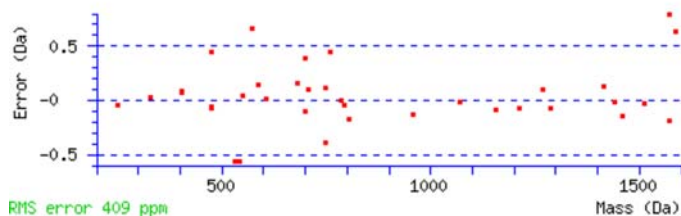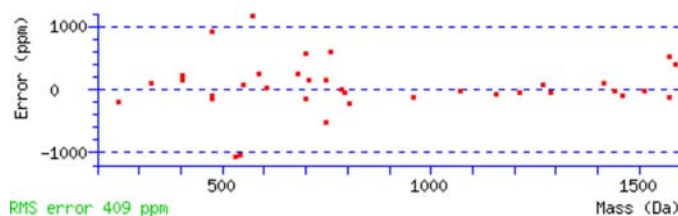



NCBI **BLAST** search of [TFVQESIYDEFVER](#)  
(Parameters: blastp, nr protein database, expect=20000, no filter, PAM30)  
Other BLAST [web gateways](#)

**All matches to this query**

| Score | Mr(calc): | Delta   | Sequence                          |
|-------|-----------|---------|-----------------------------------|
| 54.7  | 1760.8257 | 0.3670  | <a href="#">TFVQESIYDEFVER</a>    |
| 10.1  | 1760.9131 | 0.2797  | <a href="#">YSQLLALPALCEIGDR</a>  |
| 10.1  | 1761.8985 | -0.7058 | <a href="#">TFVIQGFQGNVGLHSMR</a> |
| 7.4   | 1760.9001 | 0.2927  | <a href="#">LKRPGFVCGPCCTKPR</a>  |
| 5.3   | 1759.9291 | 1.2636  | <a href="#">RPCDILTPEGFKTVK</a>   |
| 5.0   | 1758.9298 | 2.2629  | <a href="#">QLKGDNTNTVEALLMAR</a> |
| 4.2   | 1759.8965 | 1.2962  | <a href="#">AEFRTSLRPDNADLR</a>   |
| 4.0   | 1760.8879 | 0.3048  | <a href="#">IGCNLSLIGSIWGKEER</a> |
| 4.0   | 1761.7814 | -0.5887 | <a href="#">FPCANDTSVCLPPER</a>   |
| 3.9   | 1758.9087 | 2.2840  | <a href="#">FLSLSGCHQITDLGLR</a>  |

Mascot: <http://www.matrixscience.com/>

**Peptide View**

MS/MS Fragmentation of **TKEDILTYEIADVFAK**

Found in [gi|41055939|ref|NP\\_956436.1](#), sorting and assembly machinery component 50 homolog [Danio rerio]

Match to Query 46829: 1993.702724 from(997.858638,2+) index(47199)

Data file TCDD\_0530.dta

Click mouse within plot area to zoom in by factor of two about that point

Or, Plot from  to  Da

Label all possible matches  Label matches used for scoring

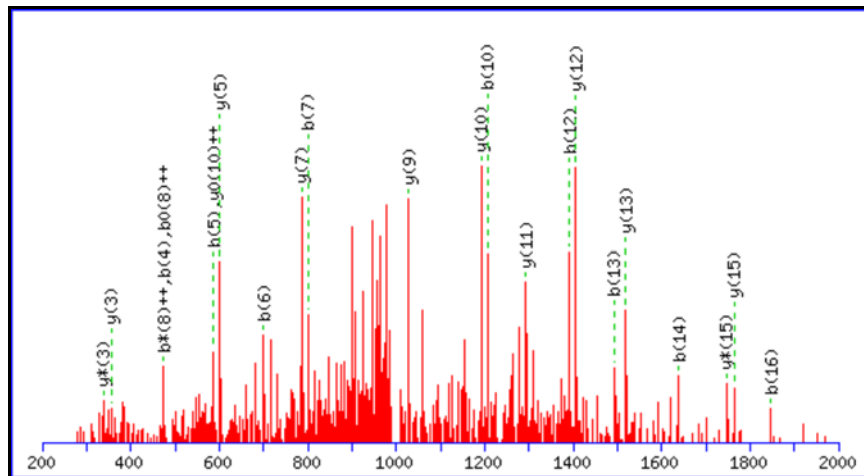

Monoisotopic mass of neutral peptide Mr(calc): 1992.0204

Ions Score: 63 Expect: 0.0001

Matches : 23/180 fragment ions using 34 most intense peaks ([help](#))

| #  | b                | b <sup>++</sup> | b <sup>*</sup> | b <sup>***</sup> | b <sup>0</sup> | b <sup>0++</sup> | Seq. | y                | y <sup>++</sup> | y <sup>*</sup>   | y <sup>***</sup> | y <sup>0</sup> | y <sup>0++</sup> | #  |
|----|------------------|-----------------|----------------|------------------|----------------|------------------|------|------------------|-----------------|------------------|------------------|----------------|------------------|----|
| 1  | 102.0550         | 51.5311         |                |                  | 84.0444        | 42.5258          | T    |                  |                 |                  |                  |                |                  | 17 |
| 2  | 230.1499         | 115.5786        | 213.1234       | 107.0653         | 212.1394       | 106.5733         | K    | 1891.9800        | 946.4936        | 1874.9535        | 937.9804         | 1873.9694      | 937.4884         | 16 |
| 3  | 359.1925         | 180.0999        | 342.1660       | 171.5866         | 341.1819       | 171.0946         | E    | <b>1763.8850</b> | 882.4462        | <b>1746.8585</b> | 873.9329         | 1745.8745      | 873.4409         | 15 |
| 4  | <b>474.2195</b>  | 237.6134        | 457.1929       | 229.1001         | 456.2089       | 228.6081         | D    | 1634.8425        | 817.9249        | 1617.8159        | 809.4116         | 1616.8319      | 808.9196         | 14 |
| 5  | <b>587.3035</b>  | 294.1554        | 570.2770       | 285.6421         | 569.2930       | 285.1501         | I    | <b>1519.8155</b> | 760.4114        | 1502.7890        | 751.8981         | 1501.8049      | 751.4061         | 13 |
| 6  | <b>700.3876</b>  | 350.6974        | 683.3610       | 342.1842         | 682.3770       | 341.6921         | L    | <b>1406.7314</b> | 703.8694        | 1389.7049        | 695.3561         | 1388.7209      | 694.8641         | 12 |
| 7  | <b>801.4353</b>  | 401.2213        | 784.4087       | 392.7080         | 783.4247       | 392.2160         | T    | <b>1293.6474</b> | 647.3273        | 1276.6208        | 638.8141         | 1275.6368      | 638.3220         | 11 |
| 8  | 964.4986         | 482.7529        | 947.4720       | <b>474.2397</b>  | 946.4880       | <b>473.7477</b>  | Y    | <b>1192.5997</b> | 596.8035        | 1175.5732        | 588.2902         | 1174.5891      | <b>587.7982</b>  | 10 |
| 9  | 1093.5412        | 547.2742        | 1076.5146      | 538.7610         | 1075.5306      | 538.2689         | E    | <b>1029.5364</b> | 515.2718        | 1012.5098        | 506.7585         | 1011.5258      | 506.2665         | 9  |
| 10 | <b>1206.6252</b> | 603.8163        | 1189.5987      | 595.3030         | 1188.6147      | 594.8110         | I    | 900.4938         | 450.7505        | 883.4672         | 442.2373         | 882.4832       | 441.7452         | 8  |
| 11 | 1277.6624        | 639.3348        | 1260.6358      | 630.8215         | 1259.6518      | 630.3295         | A    | <b>787.4097</b>  | 394.2085        | 770.3832         | 385.6952         | 769.3992       | 385.2032         | 7  |
| 12 | <b>1392.6893</b> | 696.8483        | 1375.6628      | 688.3350         | 1374.6787      | 687.8430         | D    | 716.3726         | 358.6899        | 699.3461         | 350.1767         | 698.3620       | 349.6847         | 6  |
| 13 | <b>1491.7577</b> | 746.3825        | 1474.7312      | 737.8692         | 1473.7472      | 737.3772         | V    | <b>601.3457</b>  | 301.1765        | 584.3191         | 292.6632         |                |                  | 5  |
| 14 | <b>1638.8261</b> | 819.9167        | 1621.7996      | 811.4034         | 1620.8156      | 810.9114         | F    | 502.2772         | 251.6423        | 485.2507         | 243.1290         |                |                  | 4  |
| 15 | 1775.8850        | 888.4462        | 1758.8585      | 879.9329         | 1757.8745      | 879.4409         | H    | <b>355.2088</b>  | 178.1081        | <b>338.1823</b>  | 169.5948         |                |                  | 3  |
| 16 | <b>1846.9222</b> | 923.9647        | 1829.8956      | 915.4514         | 1828.9116      | 914.9594         | A    | 218.1499         | 109.5786        | 201.1234         | 101.0653         |                |                  | 2  |
| 17 |                  |                 |                |                  |                |                  | K    | 147.1128         | 74.0600         | 130.0863         | 65.5468          |                |                  | 1  |

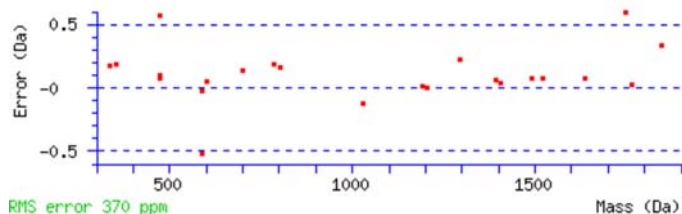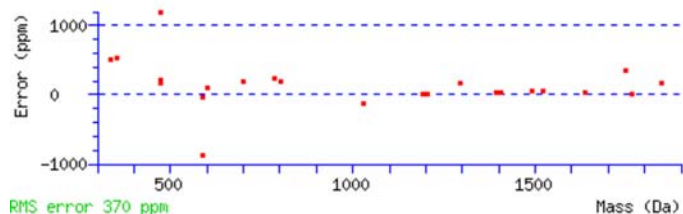

NCBI BLAST search of [TKEDILTYEIADVFHAK](#)  
 (Parameters: blastp, nr protein database, expect=20000, no filter, PAM30)  
 Other BLAST [web gateways](#)

**All matches to this query**

| Score | Mr(calc): | Delta   | Sequence                              |
|-------|-----------|---------|---------------------------------------|
| 63.2  | 1992.0204 | 1.6823  | <a href="#">TKEDILTYEIADVFHAK</a>     |
| 8.1   | 1992.0384 | 1.6643  | <a href="#">LKLQGSCTSCPSSIITLK</a>    |
| 7.3   | 1992.9727 | 0.7300  | <a href="#">LLDNMLHQEISNFYTR</a>      |
| 6.3   | 1991.9808 | 1.7219  | <a href="#">CALELEAIVNSPLNMYR</a>     |
| 5.6   | 1993.0628 | 0.6399  | <a href="#">VNMTGVIETTMTFLPLVK</a>    |
| 5.2   | 1992.9973 | 0.7055  | <a href="#">ITSTSCCIONIQIavgTK</a>    |
| 4.8   | 1993.8404 | -0.1377 | <a href="#">HSMCNSQSTCTPTLNTR</a>     |
| 4.3   | 1992.9442 | 0.7585  | <a href="#">NFGPKGFGYGQGAGALSHTQ</a>  |
| 3.9   | 1992.9584 | 0.7444  | <a href="#">AALVFTCAVCRSQMPDPK</a>    |
| 3.0   | 1992.0164 | 1.6864  | <a href="#">NALPDILGSTAGPGAADLPDK</a> |

Mascot: <http://www.matrixscience.com/>

# MASCOT SCIENCE Mascot Search Results

## Peptide View

MS/MS Fragmentation of **TLFVSGGLPTDIKPR**

Found in [gi41053746|refNP\\_956553.1](#), RNA binding protein with multiple splicing 2 [Danio rerio]

Match to Query 24466: 1543.362724 from(772.688638,2+) index(44801)

Data file TCDD\_0530.dta

Click mouse within plot area to zoom in by factor of two about that point

Or, Plot from  to  Da

Label all possible matches  Label matches used for scoring

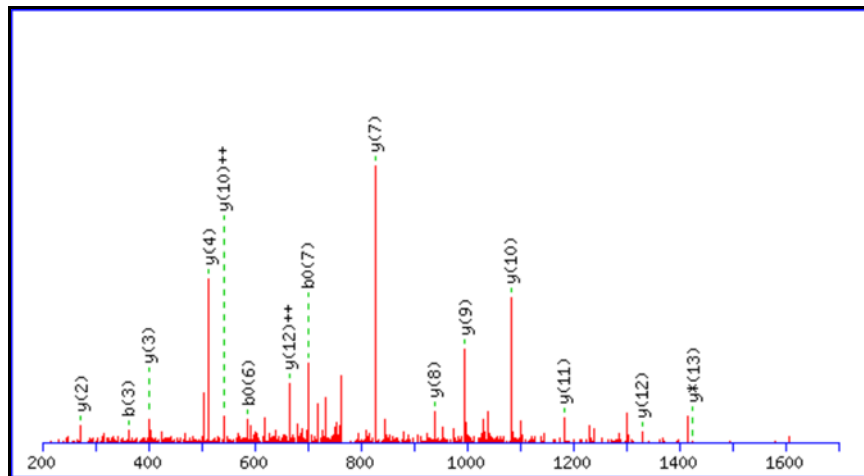

Monoisotopic mass of neutral peptide  $M_r(\text{calc})$ : 1542.8770

Ions Score: 56 Expect: 0.00061

Matches : 15/126 fragment ions using 26 most intense peaks ([help](#))

| #  | b         | b <sup>++</sup> | b <sup>*</sup> | b <sup>*++</sup> | b <sup>0</sup> | b <sup>0++</sup> | Seq. | y         | y <sup>++</sup> | y <sup>*</sup> | y <sup>*++</sup> | y <sup>0</sup> | y <sup>0++</sup> | #  |
|----|-----------|-----------------|----------------|------------------|----------------|------------------|------|-----------|-----------------|----------------|------------------|----------------|------------------|----|
| 1  | 102.0550  | 51.5311         |                |                  | 84.0444        | 42.5258          | T    |           |                 |                |                  |                |                  | 14 |
| 2  | 215.1390  | 108.0731        |                |                  | 197.1285       | 99.0679          | L    | 1442.8366 | 721.9219        | 1425.8100      | 713.4087         | 1424.8260      | 712.9166         | 13 |
| 3  | 362.2074  | 181.6074        |                |                  | 344.1969       | 172.6021         | F    | 1329.7525 | 665.3799        | 1312.7260      | 656.8666         | 1311.7419      | 656.3746         | 12 |
| 4  | 461.2758  | 231.1416        |                |                  | 443.2653       | 222.1363         | V    | 1182.6841 | 591.8457        | 1165.6576      | 583.3324         | 1164.6735      | 582.8404         | 11 |
| 5  | 548.3079  | 274.6576        |                |                  | 530.2973       | 265.6523         | S    | 1083.6157 | 542.3115        | 1066.5891      | 533.7982         | 1065.6051      | 533.3062         | 10 |
| 6  | 605.3293  | 303.1683        |                |                  | 587.3188       | 294.1630         | G    | 996.5837  | 498.7955        | 979.5571       | 490.2822         | 978.5731       | 489.7902         | 9  |
| 7  | 718.4134  | 359.7103        |                |                  | 700.4028       | 350.7051         | L    | 939.5622  | 470.2847        | 922.5356       | 461.7715         | 921.5516       | 461.2795         | 8  |
| 8  | 815.4662  | 408.2367        |                |                  | 797.4556       | 399.2314         | P    | 826.4781  | 413.7427        | 809.4516       | 405.2294         | 808.4676       | 404.7374         | 7  |
| 9  | 916.5138  | 458.7606        |                |                  | 898.5033       | 449.7553         | T    | 729.4254  | 365.2163        | 712.3988       | 356.7030         | 711.4148       | 356.2110         | 6  |
| 10 | 1031.5408 | 516.2740        |                |                  | 1013.5302      | 507.2688         | D    | 628.3777  | 314.6925        | 611.3511       | 306.1792         | 610.3671       | 305.6872         | 5  |
| 11 | 1144.6249 | 572.8161        |                |                  | 1126.6143      | 563.8108         | I    | 513.3507  | 257.1790        | 496.3242       | 248.6657         |                |                  | 4  |
| 12 | 1272.7198 | 636.8635        | 1255.6933      | 628.3503         | 1254.7093      | 627.8583         | K    | 400.2667  | 200.6370        | 383.2401       | 192.1237         |                |                  | 3  |
| 13 | 1369.7726 | 685.3899        | 1352.7460      | 676.8767         | 1351.7620      | 676.3846         | P    | 272.1717  | 136.5895        | 255.1452       | 128.0762         |                |                  | 2  |
| 14 |           |                 |                |                  |                |                  | R    | 175.1190  | 88.0631         | 158.0924       | 79.5498          |                |                  | 1  |

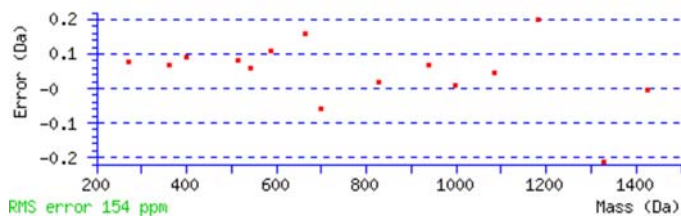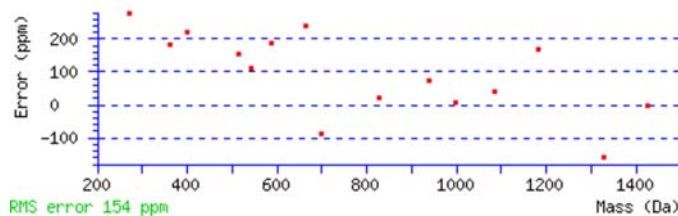

NCBI **BLAST** search of [TLFVSGGLPTDIKPR](#)  
(Parameters: blastp, nr protein database, expect=20000, no filter, PAM30)  
Other BLAST [web gateways](#)

**All matches to this query**

| Score | Mr(calc): | Delta   | Sequence                         |
|-------|-----------|---------|----------------------------------|
| 56.5  | 1542.8770 | 0.4857  | <a href="#">TLFVSGGLPTDIKPR</a>  |
| 47.8  | 1542.8253 | 0.5374  | <a href="#">KLAEQELLDVTER</a>    |
| 10.3  | 1543.8570 | -0.4943 | <a href="#">QNIDVKQTVGTTLK</a>   |
| 9.3   | 1541.9446 | 1.4181  | <a href="#">LLQFGKIIIGVWR</a>    |
| 9.1   | 1544.7082 | -1.3455 | <a href="#">FSEVLSQFWCR</a>      |
| 7.9   | 1543.7590 | -0.3963 | <a href="#">EAAAGALQNITAGDSR</a> |
| 6.3   | 1543.8206 | -0.4579 | <a href="#">VGKSGNIPAGTTVDTK</a> |
| 5.2   | 1544.6790 | -1.3163 | <a href="#">ERNHEFSMDGPAR</a>    |
| 4.8   | 1544.8198 | -1.4571 | <a href="#">KPPAPKATYETNTK</a>   |
| 4.7   | 1543.8107 | -0.4480 | <a href="#">LFSNGSLHITATQR</a>   |

Mascot: <http://www.matrixscience.com/>

# MASCOT SCIENCE Mascot Search Results

## Peptide View

MS/MS Fragmentation of **TLLGGGGVDGAIHR**

Found in [gi|52218992|ref|NP\\_001004573.1](#), hypothetical protein LOC447834 [Danio rerio]

Match to Query 18201: 1322.702724 from(662.358638,2+) index(35559)

Data file TCDD\_0530.dta

Click mouse within plot area to zoom in by factor of two about that point

Or, Plot from  to  Da

Label all possible matches  Label matches used for scoring

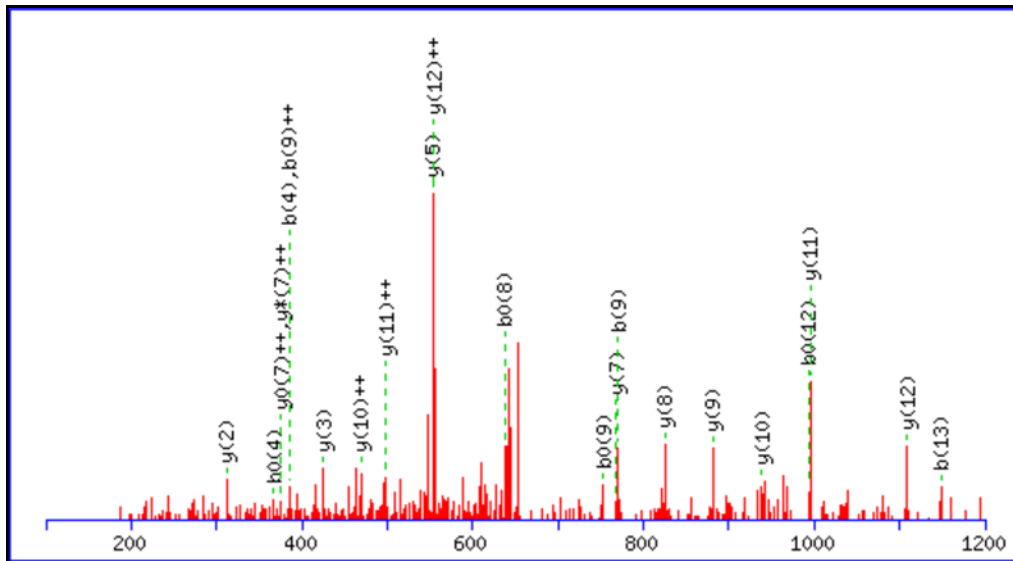

Monoisotopic mass of neutral peptide Mr(calc): 1321.7103

Ions Score: 40 Expect: 0.027

Matches : 22/120 fragment ions using 62 most intense peaks ([help](#))

| #  | b                | b <sup>++</sup> | b <sup>0</sup>  | b <sup>0++</sup> | Seq. | y                | y <sup>++</sup> | y <sup>*</sup> | y <sup>*++</sup> | y <sup>0</sup> | y <sup>0++</sup> | #  |
|----|------------------|-----------------|-----------------|------------------|------|------------------|-----------------|----------------|------------------|----------------|------------------|----|
| 1  | 102.0550         | 51.5311         | 84.0444         | 42.5258          | T    |                  |                 |                |                  |                |                  | 14 |
| 2  | 215.1390         | 108.0731        | 197.1285        | 99.0679          | L    | 1221.6698        | 611.3386        | 1204.6433      | 602.8253         | 1203.6593      | 602.3333         | 13 |
| 3  | 328.2231         | 164.6152        | 310.2125        | 155.6099         | L    | <b>1108.5858</b> | <b>554.7965</b> | 1091.5592      | 546.2833         | 1090.5752      | 545.7912         | 12 |
| 4  | <b>385.2445</b>  | 193.1259        | <b>367.2340</b> | 184.1206         | G    | <b>995.5017</b>  | <b>498.2545</b> | 978.4752       | 489.7412         | 977.4912       | 489.2492         | 11 |
| 5  | 442.2660         | 221.6366        | 424.2554        | 212.6314         | G    | <b>938.4803</b>  | <b>469.7438</b> | 921.4537       | 461.2305         | 920.4697       | 460.7385         | 10 |
| 6  | 499.2875         | 250.1474        | 481.2769        | 241.1421         | G    | <b>881.4588</b>  | 441.2330        | 864.4322       | 432.7198         | 863.4482       | 432.2278         | 9  |
| 7  | 556.3089         | 278.6581        | 538.2984        | 269.6528         | G    | <b>824.4373</b>  | 412.7223        | 807.4108       | 404.2090         | 806.4268       | 403.7170         | 8  |
| 8  | 655.3774         | 328.1923        | <b>637.3668</b> | 319.1870         | V    | <b>767.4159</b>  | 384.2116        | 750.3893       | <b>375.6983</b>  | 749.4053       | <b>375.2063</b>  | 7  |
| 9  | <b>770.4043</b>  | <b>385.7058</b> | <b>752.3937</b> | 376.7005         | D    | 668.3474         | 334.6774        | 651.3209       | 326.1641         | 650.3369       | 325.6721         | 6  |
| 10 | 827.4258         | 414.2165        | 809.4152        | 405.2112         | G    | <b>553.3205</b>  | 277.1639        | 536.2940       | 268.6506         |                |                  | 5  |
| 11 | 898.4629         | 449.7351        | 880.4523        | 440.7298         | A    | 496.2990         | 248.6532        | 479.2725       | 240.1399         |                |                  | 4  |
| 12 | 1011.5469        | 506.2771        | <b>993.5364</b> | 497.2718         | I    | <b>425.2619</b>  | 213.1346        | 408.2354       | 204.6213         |                |                  | 3  |
| 13 | <b>1148.6058</b> | 574.8066        | 1130.5953       | 565.8013         | H    | <b>312.1779</b>  | 156.5926        | 295.1513       | 148.0793         |                |                  | 2  |
| 14 |                  |                 |                 |                  | R    | 175.1190         | 88.0631         | 158.0924       | 79.5498          |                |                  | 1  |

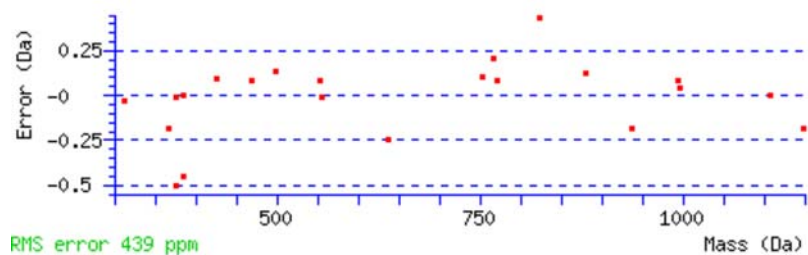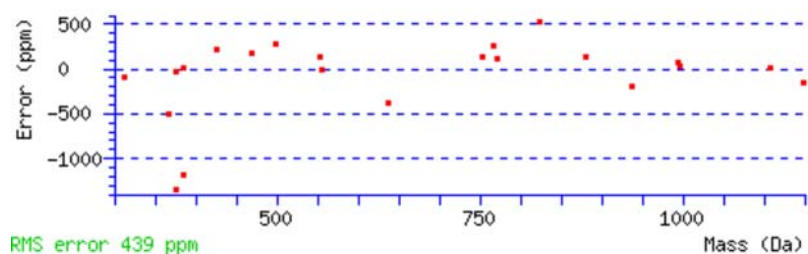

NCBI **BLAST** search of [TLLGGGGVDGAIHR](#)

(Parameters: blastp, nr protein database, expect=20000, no filter, PAM30)

Other BLAST [web gateways](#)

### All matches to this query

| Score | Mr(calc): | Delta   | Sequence                       |
|-------|-----------|---------|--------------------------------|
| 40.3  | 1321.7103 | 0.9925  | <a href="#">TLLGGGGVDGAIHR</a> |
| 14.2  | 1322.6653 | 0.0375  | <a href="#">EPRVCSPDPVPK</a>   |
| 9.5   | 1322.6466 | 0.0561  | <a href="#">NVLIQDSESYR</a>    |
| 9.4   | 1321.8194 | 0.8833  | <a href="#">TLILIGAPGVGRR</a>  |
| 6.4   | 1321.7102 | 0.9925  | <a href="#">QQGLAALQQTHK</a>   |
| 5.8   | 1322.6839 | 0.0188  | <a href="#">VVENIKCLFCR</a>    |
| 5.7   | 1322.6289 | 0.0738  | <a href="#">EGVVDIYNCVR</a>    |
| 5.0   | 1322.6877 | 0.0150  | <a href="#">MPPVQSQPAGRR</a>   |
| 4.9   | 1323.5552 | -0.8525 | <a href="#">HDSDDAESHRR</a>    |
| 4.5   | 1320.6357 | 2.0670  | <a href="#">GRIFCGDVGQNR</a>   |

Mascot: <http://www.matrixscience.com/>

**MASCOT** Mascot Search Results

**Peptide View**

MS/MS Fragmentation of **TL SAGSHAEHEGKPYC NNPCYAALFGPK**  
 Found in [gi|125842393|ref|XP\\_001333107.1](#), PREDICTED: zgc:103738 [Danio rerio]

Match to Query 107632: 2959.962723 from(987.661517,3+) index(137287)  
 Data file TCDD\_0530.dta

Click mouse within plot area to zoom in by factor of two about that point

Or, Plot from  to  Da   
 Label all possible matches  Label matches used for scoring

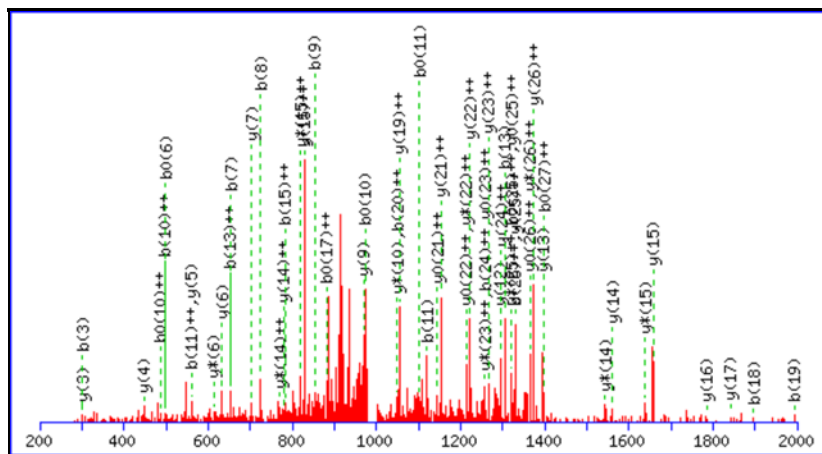

Monoisotopic mass of neutral peptide Mr(calc): 2961.3538  
 Ions Score: 43 Expect: 0.0069  
 Matches : 58/266 fragment ions using 135 most intense peaks ([help](#))

| #  | b                | b <sup>++</sup>  | b*        | b <sup>*++</sup> | b <sup>0</sup>   | b <sup>0++</sup> | Seq. | y                | y <sup>++</sup>  | y*               | y <sup>*++</sup> | y <sup>0</sup> | y <sup>0++</sup> | #  |
|----|------------------|------------------|-----------|------------------|------------------|------------------|------|------------------|------------------|------------------|------------------|----------------|------------------|----|
| 1  | 102.0550         | 51.5311          |           |                  | 84.0444          | 42.5258          | T    |                  |                  |                  |                  |                |                  | 28 |
| 2  | 215.1390         | 108.0731         |           |                  | 197.1285         | 99.0679          | L    | 2861.3134        | 1431.1603        | 2844.2868        | 1422.6471        | 2843.3028      | 1422.1551        | 27 |
| 3  | <b>302.1710</b>  | 151.5892         |           |                  | 284.1605         | 142.5839         | S    | 2748.2293        | <b>1374.6183</b> | 2731.2028        | <b>1366.1050</b> | 2730.2188      | <b>1365.6130</b> | 26 |
| 4  | 373.2082         | 187.1077         |           |                  | 355.1976         | 178.1024         | A    | 2661.1973        | <b>1331.1023</b> | 2644.1708        | <b>1322.5890</b> | 2643.1867      | <b>1322.0970</b> | 25 |
| 5  | 430.2296         | 215.6185         |           |                  | 412.2191         | 206.6132         | G    | 2590.1602        | <b>1295.5837</b> | 2573.1336        | 1287.0705        | 2572.1496      | 1286.5785        | 24 |
| 6  | 517.2617         | 259.1345         |           |                  | <b>499.2511</b>  | 250.1292         | S    | 2533.1387        | <b>1267.0730</b> | 2516.1122        | <b>1258.5597</b> | 2515.1282      | <b>1258.0677</b> | 23 |
| 7  | <b>654.3206</b>  | 327.6639         |           |                  | 636.3100         | 318.6586         | H    | 2446.1067        | <b>1223.5570</b> | 2429.0801        | <b>1215.0437</b> | 2428.0961      | <b>1214.5517</b> | 22 |
| 8  | <b>725.3577</b>  | 363.1825         |           |                  | 707.3471         | 354.1772         | A    | 2309.0478        | <b>1155.0275</b> | 2292.0212        | 1146.5143        | 2291.0372      | <b>1146.0222</b> | 21 |
| 9  | <b>854.4003</b>  | 427.7038         |           |                  | 836.3897         | 418.6985         | E    | 2238.0107        | 1119.5090        | 2220.9841        | 1110.9957        | 2220.0001      | 1110.5037        | 20 |
| 10 | 991.4592         | <b>496.2332</b>  |           |                  | <b>973.4486</b>  | <b>487.2279</b>  | H    | 2108.9681        | <b>1054.9877</b> | 2091.9415        | 1046.4744        | 2090.9575      | 1045.9824        | 19 |
| 11 | <b>1120.5018</b> | <b>560.7545</b>  |           |                  | <b>1102.4912</b> | 551.7492         | E    | 1971.9092        | 986.4582         | 1954.8826        | 977.9449         | 1953.8986      | 977.4529         | 18 |
| 12 | 1177.5232        | 589.2653         |           |                  | 1159.5127        | 580.2600         | G    | <b>1842.8666</b> | 921.9369         | 1825.8400        | 913.4237         |                |                  | 17 |
| 13 | <b>1305.6182</b> | <b>653.3127</b>  | 1288.5917 | 644.7995         | 1287.6076        | 644.3075         | K    | <b>1785.8451</b> | 893.4262         | 1768.8186        | 884.9129         |                |                  | 16 |
| 14 | 1402.6710        | 701.8391         | 1385.6444 | 693.3258         | 1384.6604        | 692.8338         | P    | <b>1657.7501</b> | <b>829.3787</b>  | <b>1640.7236</b> | <b>820.8654</b>  |                |                  | 15 |
| 15 | 1565.7343        | <b>783.3708</b>  | 1548.7077 | 774.8575         | 1547.7237        | 774.3655         | Y    | <b>1560.6974</b> | <b>780.8523</b>  | <b>1543.6708</b> | <b>772.3391</b>  |                |                  | 14 |
| 16 | 1668.7435        | 834.8754         | 1651.7169 | 826.3621         | 1650.7329        | 825.8701         | C    | <b>1397.6341</b> | 699.3207         | 1380.6075        | 690.8074         |                |                  | 13 |
| 17 | 1782.7864        | 891.8968         | 1765.7599 | 883.3836         | 1764.7758        | <b>882.8916</b>  | N    | <b>1294.6249</b> | 647.8161         | 1277.5983        | 639.3028         |                |                  | 12 |
| 18 | <b>1896.8293</b> | 948.9183         | 1879.8028 | 940.4050         | 1878.8188        | 939.9130         | N    | 1180.5819        | 590.7946         | 1163.5554        | 582.2813         |                |                  | 11 |
| 19 | <b>1993.8821</b> | 997.4447         | 1976.8556 | 988.9314         | 1975.8715        | 988.4394         | P    | 1066.5390        | 533.7731         | <b>1049.5125</b> | 525.2599         |                |                  | 10 |
| 20 | 2096.8913        | <b>1048.9493</b> | 2079.8647 | 1040.4360        | 2078.8807        | 1039.9440        | C    | <b>969.4863</b>  | 485.2468         | 952.4597         | 476.7335         |                |                  | 9  |
| 21 | 2259.9546        | 1130.4809        | 2242.9281 | 1121.9677        | 2241.9440        | 1121.4757        | Y    | 866.4771         | 433.7422         | 849.4505         | 425.2289         |                |                  | 8  |
| 22 | 2330.9917        | 1165.9995        | 2313.9652 | 1157.4862        | 2312.9812        | 1156.9942        | A    | <b>703.4137</b>  | 352.2105         | 686.3872         | 343.6972         |                |                  | 7  |
| 23 | 2402.0288        | 1201.5181        | 2385.0023 | 1193.0048        | 2384.0183        | 1192.5128        | A    | <b>632.3766</b>  | 316.6920         | <b>615.3501</b>  | 308.1787         |                |                  | 6  |
| 24 | 2515.1129        | <b>1258.0601</b> | 2498.0864 | 1249.5468        | 2497.1023        | 1249.0548        | L    | <b>561.3395</b>  | 281.1734         | 544.3130         | 272.6601         |                |                  | 5  |



|    |           |                  |           |           |           |                  |   |                 |          |          |          |  |  |   |
|----|-----------|------------------|-----------|-----------|-----------|------------------|---|-----------------|----------|----------|----------|--|--|---|
| 25 | 2662.1813 | <b>1331.5943</b> | 2645.1548 | 1323.0810 | 2644.1708 | <b>1322.5890</b> | F | <b>448.2554</b> | 224.6314 | 431.2289 | 216.1181 |  |  | 4 |
| 26 | 2719.2028 | 1360.1050        | 2702.1762 | 1351.5918 | 2701.1922 | 1351.0997        | G | <b>301.1870</b> | 151.0972 | 284.1605 | 142.5839 |  |  | 3 |
| 27 | 2816.2555 | 1408.6314        | 2799.2290 | 1400.1181 | 2798.2450 | <b>1399.6261</b> | P | 244.1656        | 122.5864 | 227.1390 | 114.0731 |  |  | 2 |
| 28 |           |                  |           |           |           |                  | K | 147.1128        | 74.0600  | 130.0863 | 65.5468  |  |  | 1 |

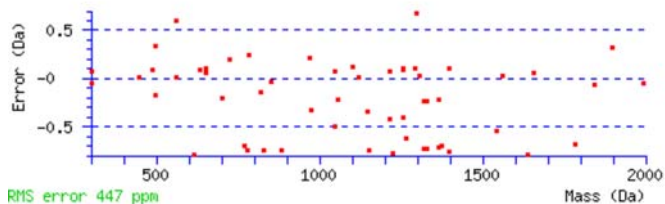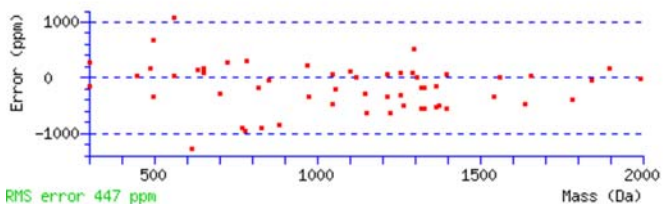

NCBI **BLAST** search of [TLSAGSHAEHEGKPYCNNPCYAALFGPK](#)  
 (Parameters: blastp, nr protein database, expect=20000, no filter, PAM30)  
 Other BLAST [web gateways](#)

**All matches to this query**

| Score | Mr(calc): | Delta   | Sequence                                         |
|-------|-----------|---------|--------------------------------------------------|
| 42.6  | 2961.3538 | -1.3910 | <a href="#">TLSAGSHAEHEGKPYCNNPCYAALFGPK</a>     |
| 14.4  | 2961.3080 | -1.3452 | <a href="#">SDVAQNILEIAGACAEAEAGACAGEAEGEAGR</a> |
| 4.5   | 2959.4862 | 0.4765  | <a href="#">TCTVINVEGDYAGAGLLOYLIDRHPNK</a>      |
| 2.4   | 2959.5497 | 0.4130  | <a href="#">HAILSSNPKHFYYPGAGAWVLSLLYR</a>       |
| 0.7   | 2958.6021 | 1.3606  | <a href="#">QLPQISVPWIHPGFGLPYWRADLLR</a>        |
| 0.3   | 2958.4851 | 1.4776  | <a href="#">AFCFLPLSLETGLPFHVNGHFALDSAR</a>      |

**Mascot:** <http://www.matrixscience.com/>

# MASCOT SCIENCE Mascot Search Results

## Peptide View

MS/MS Fragmentation of **TTGLVGLAVSQNPHER**

Found in [gi|61806484|ref|NP\\_001013474.1](#), hypothetical protein LOC541328 [Danio rerio]

Match to Query 29046: 1677.522724 from(839.768638,2+) index(35969)

Data file TCDD\_0530.dta

Click mouse within plot area to zoom in by factor of two about that point

Or, Plot from  to  Da

Label all possible matches  Label matches used for scoring

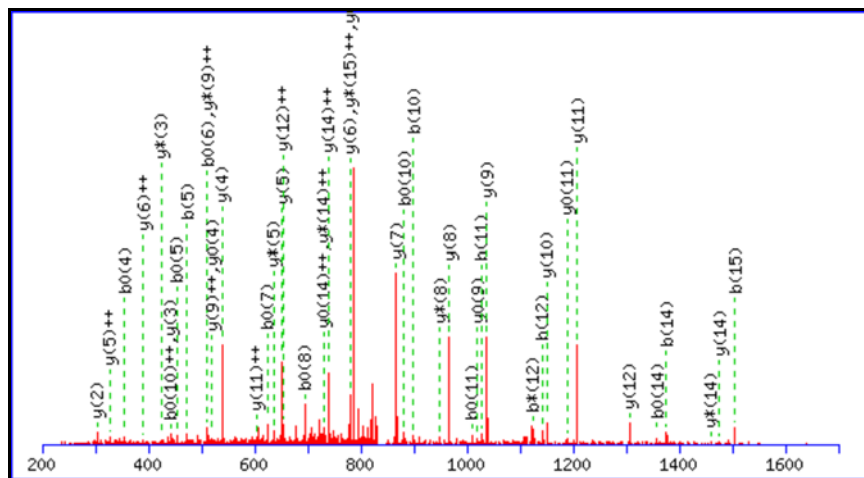

Monoisotopic mass of neutral peptide  $M_r(\text{calc})$ : 1677.8798

Ions Score: 58 Expect: 0.00045

Matches : 46/158 fragment ions using 95 most intense peaks ([help](#))

| #  | b         | b <sup>++</sup> | b <sup>*</sup> | b <sup>*++</sup> | b <sup>0</sup> | b <sup>0++</sup> | Seq. | y         | y <sup>++</sup> | y <sup>*</sup> | y <sup>*++</sup> | y <sup>0</sup> | y <sup>0++</sup> | #  |
|----|-----------|-----------------|----------------|------------------|----------------|------------------|------|-----------|-----------------|----------------|------------------|----------------|------------------|----|
| 1  | 102.0550  | 51.5311         |                |                  | 84.0444        | 42.5258          | T    |           |                 |                |                  |                |                  | 16 |
| 2  | 203.1026  | 102.0550        |                |                  | 185.0921       | 93.0497          | T    | 1577.8394 | 789.4234        | 1560.8129      | 780.9101         | 1559.8289      | 780.4181         | 15 |
| 3  | 260.1241  | 130.5657        |                |                  | 242.1135       | 121.5604         | G    | 1476.7918 | 738.8995        | 1459.7652      | 730.3862         | 1458.7812      | 729.8942         | 14 |
| 4  | 373.2082  | 187.1077        |                |                  | 355.1976       | 178.1024         | L    | 1419.7703 | 710.3888        | 1402.7437      | 701.8755         | 1401.7597      | 701.3835         | 13 |
| 5  | 472.2766  | 236.6419        |                |                  | 454.2660       | 227.6366         | V    | 1306.6862 | 653.8467        | 1289.6597      | 645.3335         | 1288.6757      | 644.8415         | 12 |
| 6  | 529.2980  | 265.1527        |                |                  | 511.2875       | 256.1474         | G    | 1207.6178 | 604.3125        | 1190.5913      | 595.7993         | 1189.6072      | 595.3073         | 11 |
| 7  | 642.3821  | 321.6947        |                |                  | 624.3715       | 312.6894         | L    | 1150.5963 | 575.8018        | 1133.5698      | 567.2885         | 1132.5858      | 566.7965         | 10 |
| 8  | 713.4192  | 357.2132        |                |                  | 695.4087       | 348.2080         | A    | 1037.5123 | 519.2598        | 1020.4857      | 510.7465         | 1019.5017      | 510.2545         | 9  |
| 9  | 812.4876  | 406.7475        |                |                  | 794.4771       | 397.7422         | V    | 966.4752  | 483.7412        | 949.4486       | 475.2279         | 948.4646       | 474.7359         | 8  |
| 10 | 899.5197  | 450.2635        |                |                  | 881.5091       | 441.2582         | S    | 867.4068  | 434.2070        | 850.3802       | 425.6937         | 849.3962       | 425.2017         | 7  |
| 11 | 1027.5782 | 514.2928        | 1010.5517      | 505.7795         | 1009.5677      | 505.2875         | Q    | 780.3747  | 390.6910        | 763.3482       | 382.1777         | 762.3642       | 381.6857         | 6  |
| 12 | 1141.6212 | 571.3142        | 1124.5946      | 562.8009         | 1123.6106      | 562.3089         | N    | 652.3161  | 326.6617        | 635.2896       | 318.1484         | 634.3056       | 317.6564         | 5  |
| 13 | 1238.6739 | 619.8406        | 1221.6474      | 611.3273         | 1220.6634      | 610.8353         | P    | 538.2732  | 269.6402        | 521.2467       | 261.1270         | 520.2627       | 260.6350         | 4  |
| 14 | 1375.7328 | 688.3701        | 1358.7063      | 679.8568         | 1357.7223      | 679.3648         | H    | 441.2205  | 221.1139        | 424.1939       | 212.6006         | 423.2099       | 212.1086         | 3  |
| 15 | 1504.7754 | 752.8914        | 1487.7489      | 744.3781         | 1486.7649      | 743.8861         | E    | 304.1615  | 152.5844        | 287.1350       | 144.0711         | 286.1510       | 143.5791         | 2  |
| 16 |           |                 |                |                  |                |                  | R    | 175.1190  | 88.0631         | 158.0924       | 79.5498          |                |                  | 1  |

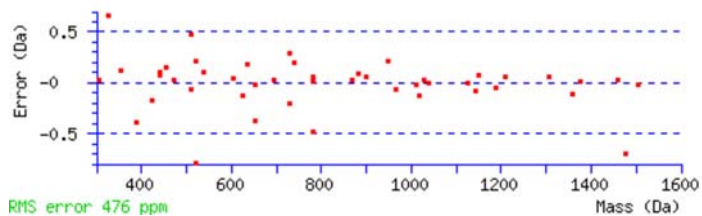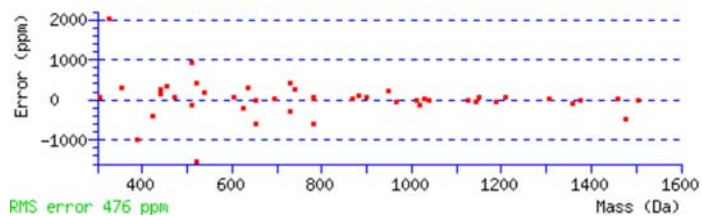

NCBI BLAST search of [TTGLVGLAVSQNPHER](#)  
 (Parameters: blastp, nr protein database, expect=20000, no filter, PAM30)  
 Other BLAST [web gateways](#)

**All matches to this query**

| Score | Mr(calc): | Delta   | Sequence                            |
|-------|-----------|---------|-------------------------------------|
| 57.8  | 1677.8798 | -0.3571 | <a href="#">TTGLVGLAVSQNPHER</a>    |
| 6.1   | 1677.8322 | -0.3095 | <a href="#">TDSKLPEIQEHPER</a>      |
| 4.6   | 1675.9482 | 1.5746  | <a href="#">RPGAEINADLLRPVR</a>     |
| 4.2   | 1678.8461 | -1.3233 | <a href="#">QAPLKPHCLSAETER</a>     |
| 2.7   | 1677.7814 | -0.2587 | <a href="#">ELGLCDRCLSLDER</a>      |
| 2.1   | 1677.6615 | -0.1388 | <a href="#">EGWGSGEDGEAGGGGGSGR</a> |
| 1.1   | 1677.7569 | -0.2342 | <a href="#">FTFRCSDGINFSER</a>      |

Mascot: <http://www.matrixscience.com/>

**MATRIX SCIENCE Mascot Search Results**

**Peptide View**

MS/MS Fragmentation of **VAFTGSTDVGHLIQQASSASNLK**

Found in [gi|189538766|ref|XP\\_001921117.1|](#), PREDICTED: similar to mitogen-activated protein kinase-activated protein kinase 5 [Danio rerio]

Match to Query 79710: 2331.082725 from(778.034851,3+) index(20350)

Data file TCDD\_0530.dta

Click mouse within plot area to zoom in by factor of two about that point

Or, Plot from  to  Da

Label all possible matches  Label matches used for scoring

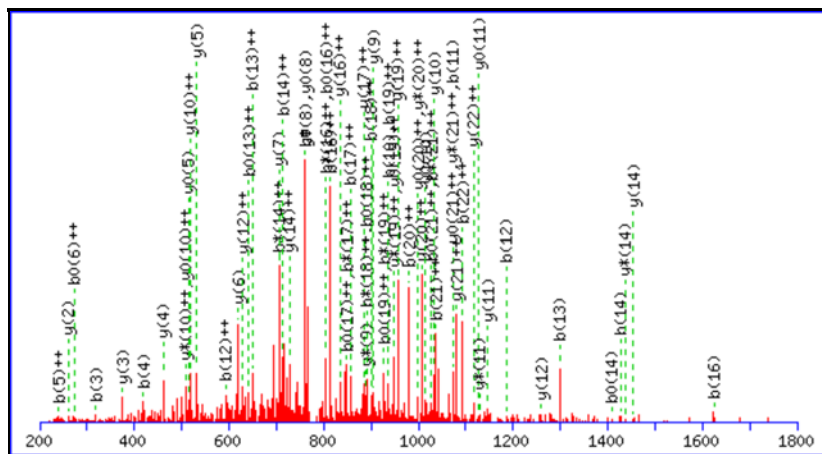

Monoisotopic mass of neutral peptide Mr(calc): 2330.1866

Ions Score: 59 Expect: 0.00021

Matches : 70/226 fragment ions using 134 most intense peaks ([help](#))

| #  | b                | b <sup>++</sup>  | b*        | b <sup>*++</sup> | b <sup>0</sup>   | b <sup>0++</sup> | Seq. | y                | y <sup>++</sup>  | y*               | y <sup>*++</sup> | y <sup>0</sup>   | y <sup>0++</sup> | #  |
|----|------------------|------------------|-----------|------------------|------------------|------------------|------|------------------|------------------|------------------|------------------|------------------|------------------|----|
| 1  | 100.0757         | 50.5415          |           |                  |                  |                  | V    |                  |                  |                  |                  |                  |                  | 23 |
| 2  | 171.1128         | 86.0600          |           |                  |                  |                  | A    | 2232.1255        | 1116.5664        | 2215.0990        | 1108.0531        | 2214.1149        | 1107.5611        | 22 |
| 3  | <b>318.1812</b>  | 159.5942         |           |                  |                  |                  | F    | 2161.0884        | <b>1081.0478</b> | 2144.0618        | <b>1072.5346</b> | 2143.0778        | <b>1072.0425</b> | 21 |
| 4  | <b>419.2289</b>  | 210.1181         |           |                  | 401.2183         | 201.1128         | T    | 2014.0200        | <b>1007.5136</b> | 1996.9934        | <b>999.0004</b>  | 1996.0094        | <b>998.5083</b>  | 20 |
| 5  | 476.2504         | <b>238.6288</b>  |           |                  | 458.2398         | 229.6235         | G    | 1912.9723        | <b>956.9898</b>  | 1895.9457        | <b>948.4765</b>  | 1894.9617        | <b>947.9845</b>  | 19 |
| 6  | 563.2824         | 282.1448         |           |                  | 545.2718         | <b>273.1396</b>  | S    | 1855.9508        | 928.4791         | 1838.9243        | 919.9658         | 1837.9403        | 919.4738         | 18 |
| 7  | 664.3301         | 332.6687         |           |                  | 646.3195         | 323.6634         | T    | 1768.9188        | <b>884.9630</b>  | 1751.8923        | 876.4498         | 1750.9082        | 875.9578         | 17 |
| 8  | 779.3570         | 390.1821         |           |                  | <b>761.3464</b>  | 381.1769         | D    | 1667.8711        | <b>834.4392</b>  | 1650.8446        | 825.9259         | 1649.8606        | 825.4339         | 16 |
| 9  | 878.4254         | 439.7164         |           |                  | 860.4149         | 430.7111         | V    | 1552.8442        | 776.9257         | 1535.8176        | 768.4125         | 1534.8336        | 767.9204         | 15 |
| 10 | <b>935.4469</b>  | 468.2271         |           |                  | 917.4363         | 459.2218         | G    | <b>1453.7758</b> | <b>727.3915</b>  | <b>1436.7492</b> | 718.8782         | 1435.7652        | 718.3862         | 14 |
| 11 | <b>1072.5058</b> | 536.7565         |           |                  | 1054.4952        | 527.7513         | H    | 1396.7543        | 698.8808         | 1379.7278        | 690.3675         | 1378.7437        | 689.8755         | 13 |
| 12 | <b>1185.5899</b> | <b>593.2986</b>  |           |                  | 1167.5793        | 584.2933         | L    | <b>1259.6954</b> | <b>630.3513</b>  | 1242.6688        | 621.8381         | 1241.6848        | 621.3461         | 12 |
| 13 | <b>1298.6739</b> | <b>649.8406</b>  |           |                  | 1280.6634        | <b>640.8353</b>  | I    | <b>1146.6113</b> | 573.8093         | <b>1129.5848</b> | 565.2960         | <b>1128.6008</b> | 564.8040         | 11 |
| 14 | <b>1426.7325</b> | <b>713.8699</b>  | 1409.7060 | <b>705.3566</b>  | <b>1408.7219</b> | 704.8646         | Q    | <b>1033.5273</b> | <b>517.2673</b>  | 1016.5007        | <b>508.7540</b>  | <b>1015.5167</b> | <b>508.2620</b>  | 10 |
| 15 | 1554.7911        | 777.8992         | 1537.7645 | 769.3859         | 1536.7805        | 768.8939         | Q    | <b>905.4687</b>  | 453.2380         | <b>888.4421</b>  | 444.7247         | 887.4581         | 444.2327         | 9  |
| 16 | <b>1625.8282</b> | <b>813.4177</b>  | 1608.8017 | <b>804.9045</b>  | 1607.8176        | <b>804.4125</b>  | A    | 777.4101         | 389.2087         | <b>760.3836</b>  | 380.6954         | <b>759.3995</b>  | 380.2034         | 8  |
| 17 | 1712.8602        | <b>856.9338</b>  | 1695.8337 | <b>848.4205</b>  | 1694.8497        | <b>847.9285</b>  | S    | <b>706.3730</b>  | 353.6901         | 689.3464         | 345.1769         | 688.3624         | 344.6849         | 7  |
| 18 | 1799.8923        | <b>900.4498</b>  | 1782.8657 | <b>891.9365</b>  | 1781.8817        | <b>891.4445</b>  | S    | <b>619.3410</b>  | 310.1741         | 602.3144         | 301.6608         | 601.3304         | 301.1688         | 6  |
| 19 | 1870.9294        | <b>935.9683</b>  | 1853.9028 | <b>927.4550</b>  | 1852.9188        | <b>926.9630</b>  | A    | <b>532.3089</b>  | 266.6581         | 515.2824         | 258.1448         | <b>514.2984</b>  | 257.6528         | 5  |
| 20 | 1957.9614        | <b>979.4843</b>  | 1940.9348 | 970.9711         | 1939.9508        | 970.4791         | S    | <b>461.2718</b>  | 231.1395         | 444.2453         | 222.6263         | 443.2613         | 222.1343         | 4  |
| 21 | 2072.0043        | <b>1036.5058</b> | 2054.9778 | <b>1027.9925</b> | 2053.9938        | <b>1027.5005</b> | N    | <b>374.2398</b>  | 187.6235         | 357.2132         | 179.1103         |                  |                  | 3  |
| 22 | 2185.0884        | <b>1093.0478</b> | 2168.0618 | 1084.5346        | 2167.0778        | 1084.0425        | L    | <b>260.1969</b>  | 130.6021         | 243.1703         | 122.0888         |                  |                  | 2  |
| 23 |                  |                  |           |                  |                  |                  | K    | 147.1128         | 74.0600          | 130.0863         | 65.5468          |                  |                  | 1  |

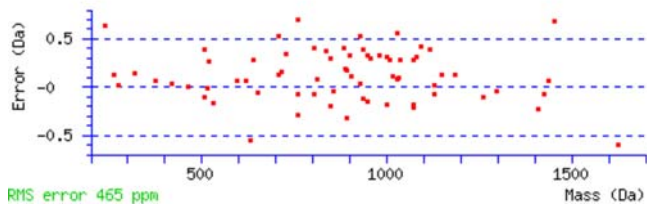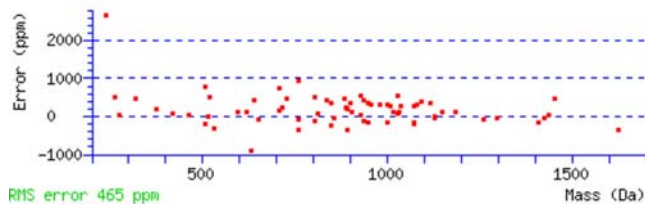

NCBI BLAST search of [VAFTGSTDVGHLIQQASSASNLK](#)

(Parameters: blastp, nr protein database, expect=20000, no filter, PAM30)

Other BLAST [web gateways](#)

**All matches to this query**

| Score | Mr(calc): | Delta   | Sequence                                |
|-------|-----------|---------|-----------------------------------------|
| 59.5  | 2330.1866 | 0.8961  | <a href="#">VAFTGSTDVGHLIQQASSASNLK</a> |
| 9.6   | 2331.9011 | -0.8184 | <a href="#">QECQCGTGGICNQTGECVCK</a>    |
| 8.0   | 2330.1729 | 0.9098  | <a href="#">CESVLSIWSSGFFSNRSIALK</a>   |
| 7.1   | 2331.0506 | 0.0321  | <a href="#">MEGLLDTEEFCCSICLDLLK</a>    |
| 6.7   | 2331.1324 | -0.0497 | <a href="#">GNPADFLWWPEAELAFNNLK</a>    |
| 5.5   | 2331.2297 | -0.1470 | <a href="#">FRSGFLICFLISLSEASVQK</a>    |
| 5.3   | 2331.1053 | -0.0226 | <a href="#">TFELQSTNITFTNMVSVDER</a>    |
| 4.8   | 2331.0506 | 0.0321  | <a href="#">MEGLLDTEEFCCSICLDLLK</a>    |
| 4.8   | 2328.9951 | 2.0876  | <a href="#">YSCHASNDVGKDSCSTEVSVK</a>   |
| 4.5   | 2333.0924 | -2.0097 | <a href="#">FRQIWTEHSDLNTSEDLDK</a>     |

Mascot: <http://www.matrixscience.com/>

# **MATRIX SCIENCE** Mascot Search Results

## Peptide View

MS/MS Fragmentation of **VCTDGGSEK**

Found in [gi|125815320|ref|XP\\_697137.2](#), PREDICTED: similar to Cystine/glutamate transporter (Amino acid transport system xc-) (xCT) (Solute carrier family 7 member 11) (Calcium channel blocker resistance protein CCB1) [Danio rerio]

Match to Query 7340: 951.282724 from(476.648638,2+) index(108604)

Data file TCDD\_0530.dta

Click mouse within plot area to zoom in by factor of two about that point

Or, Plot from  to  Da

Label all possible matches  Label matches used for scoring

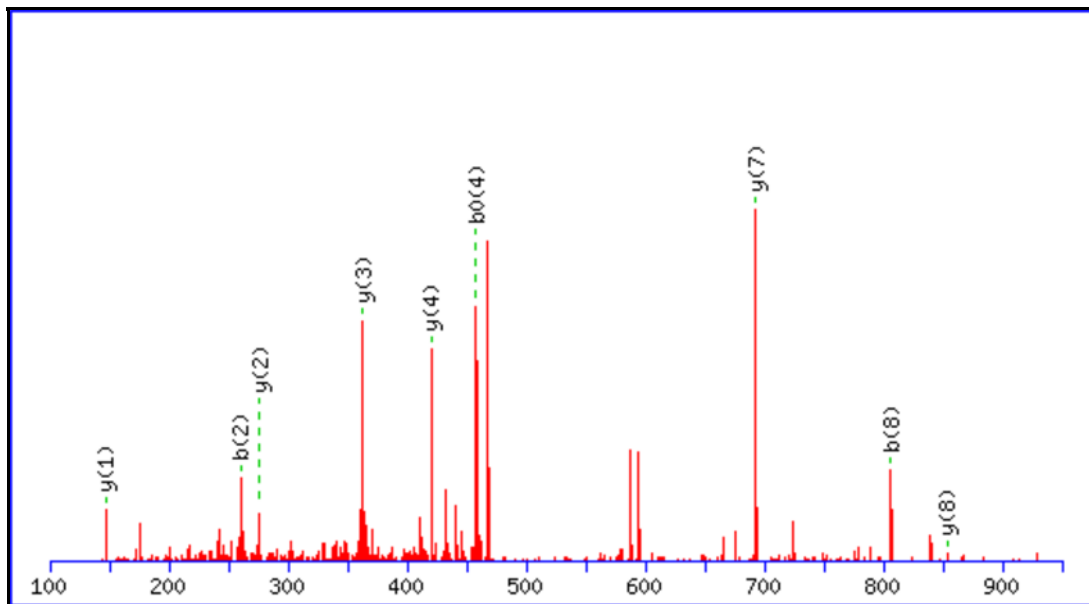

Monoisotopic mass of neutral peptide Mr(calc): 951.3968

Variable modifications:

C2 : Carbamidomethyl (C)

Ions Score: 45 Expect: 0.011

Matches : 9/74 fragment ions using 16 most intense peaks ([help](#))

| # | b        | b <sup>++</sup> | b <sup>0</sup> | b <sup>0++</sup> | Seq. | y        | y <sup>++</sup> | y*       | y* <sup>++</sup> | y <sup>0</sup> | y <sup>0++</sup> | # |
|---|----------|-----------------|----------------|------------------|------|----------|-----------------|----------|------------------|----------------|------------------|---|
| 1 | 100.0757 | 50.5415         |                |                  | V    |          |                 |          |                  |                |                  | 9 |
| 2 | 260.1063 | 130.5568        |                |                  | C    | 853.3356 | 427.1715        | 836.3091 | 418.6582         | 835.3251       | 418.1662         | 8 |
| 3 | 361.1540 | 181.0806        | 343.1435       | 172.0754         | T    | 693.3050 | 347.1561        | 676.2784 | 338.6429         | 675.2944       | 338.1508         | 7 |
| 4 | 476.1810 | 238.5941        | 458.1704       | 229.5888         | D    | 592.2573 | 296.6323        | 575.2307 | 288.1190         | 574.2467       | 287.6270         | 6 |
| 5 | 533.2024 | 267.1049        | 515.1919       | 258.0996         | G    | 477.2304 | 239.1188        | 460.2038 | 230.6055         | 459.2198       | 230.1135         | 5 |
| 6 | 590.2239 | 295.6156        | 572.2133       | 286.6103         | G    | 420.2089 | 210.6081        | 403.1823 | 202.0948         | 402.1983       | 201.6028         | 4 |
| 7 | 677.2559 | 339.1316        | 659.2454       | 330.1263         | S    | 363.1874 | 182.0974        | 346.1609 | 173.5841         | 345.1769       | 173.0921         | 3 |
| 8 | 806.2985 | 403.6529        | 788.2879       | 394.6476         | E    | 276.1554 | 138.5813        | 259.1288 | 130.0681         | 258.1448       | 129.5761         | 2 |

|   |  |  |  |  |   |          |         |          |         |  |  |   |
|---|--|--|--|--|---|----------|---------|----------|---------|--|--|---|
| 9 |  |  |  |  | K | 147.1128 | 74.0600 | 130.0863 | 65.5468 |  |  | 1 |
|---|--|--|--|--|---|----------|---------|----------|---------|--|--|---|

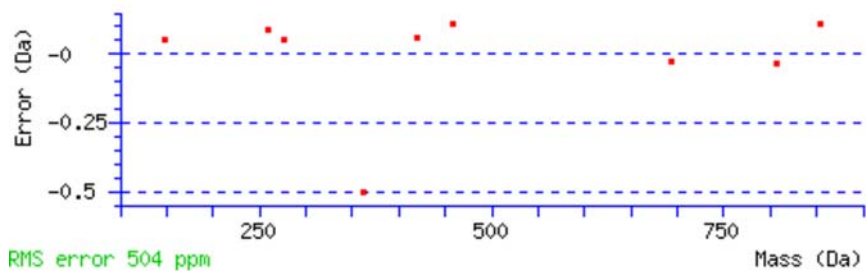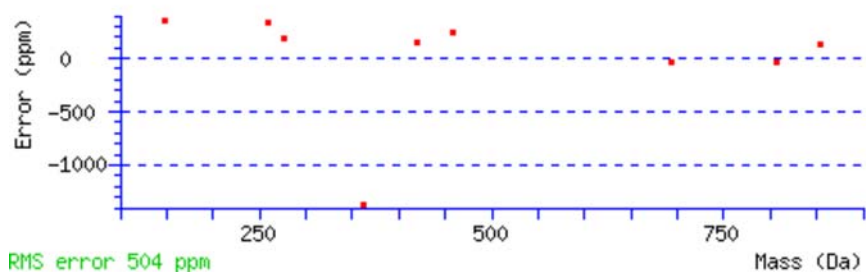

NCBI BLAST search of [VCTDGGSEK](#)

(Parameters: blastp, nr protein database, expect=20000, no filter, PAM30)

Other BLAST [web gateways](#)

#### All matches to this query

| Score | Mr(calc): | Delta   | Sequence                  |
|-------|-----------|---------|---------------------------|
| 44.6  | 951.3968  | -0.1141 | <a href="#">VCTDGGSEK</a> |
| 25.9  | 952.4874  | -1.2047 | <a href="#">FLLCCLK</a>   |
| 24.6  | 952.4688  | -1.1861 | <a href="#">FICSENLK</a>  |
| 20.2  | 951.4154  | -0.1327 | <a href="#">DSCGLCLK</a>  |
| 19.0  | 951.4154  | -0.1327 | <a href="#">VCEKCEK</a>   |
| 18.6  | 952.4721  | -1.1894 | <a href="#">MKMSLSEK</a>  |
| 18.4  | 951.4518  | -0.1690 | <a href="#">DKTMNCIK</a>  |
| 18.4  | 951.5753  | -0.2926 | <a href="#">ELHSLLLK</a>  |
| 18.4  | 951.4661  | -0.1834 | <a href="#">FSQSENLK</a>  |
| 18.4  | 951.5211  | -0.2384 | <a href="#">KYACNLLK</a>  |

Mascot: <http://www.matrixscience.com/>

**MATRIX SCIENCE** Mascot Search Results

**Peptide View**

MS/MS Fragmentation of **VETVFSHVLKPFPTHITQAER**

Found in [gi|37497110|ref|NP\\_922916.1](#), ribophorin I [Danio rerio]

Match to Query 88984: 2435.792724 from(812.938184,3+) index(138078)

Data file TCDD\_0530.dta

Click mouse within plot area to zoom in by factor of two about that point

Or, Plot from  to  Da

Label all possible matches  Label matches used for scoring

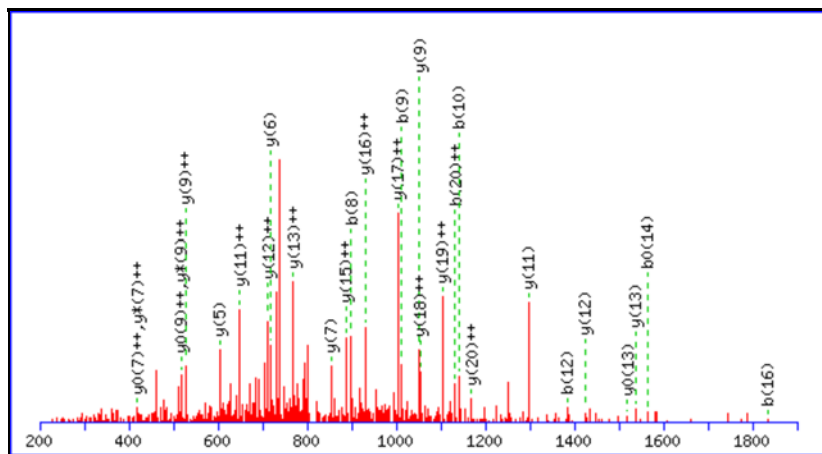

Monoisotopic mass of neutral peptide Mr(calc): 2435.2961

Ions Score: 53 Expect: 0.00075

Matches : 29/218 fragment ions using 47 most intense peaks ([help](#))

| #  | b         | b <sup>++</sup> | b*        | b <sup>*++</sup> | b <sup>0</sup> | b <sup>0++</sup> | Seq. | y         | y <sup>++</sup> | y*        | y <sup>*++</sup> | y <sup>0</sup> | y <sup>0++</sup> | #  |
|----|-----------|-----------------|-----------|------------------|----------------|------------------|------|-----------|-----------------|-----------|------------------|----------------|------------------|----|
| 1  | 100.0757  | 50.5415         |           |                  |                |                  | V    |           |                 |           |                  |                |                  | 21 |
| 2  | 229.1183  | 115.0628        |           |                  | 211.1077       | 106.0575         | E    | 2337.2350 | 1169.1211       | 2320.2084 | 1160.6079        | 2319.2244      | 1160.1159        | 20 |
| 3  | 330.1660  | 165.5866        |           |                  | 312.1554       | 156.5813         | T    | 2208.1924 | 1104.5998       | 2191.1659 | 1096.0866        | 2190.1818      | 1095.5946        | 19 |
| 4  | 429.2344  | 215.1208        |           |                  | 411.2238       | 206.1155         | V    | 2107.1447 | 1054.0760       | 2090.1182 | 1045.5627        | 2089.1342      | 1045.0707        | 18 |
| 5  | 576.3028  | 288.6550        |           |                  | 558.2922       | 279.6498         | F    | 2008.0763 | 1004.5418       | 1991.0498 | 996.0285         | 1990.0657      | 995.5365         | 17 |
| 6  | 663.3348  | 332.1710        |           |                  | 645.3243       | 323.1658         | S    | 1861.0079 | 931.0076        | 1843.9813 | 922.4943         | 1842.9973      | 922.0023         | 16 |
| 7  | 800.3937  | 400.7005        |           |                  | 782.3832       | 391.6952         | H    | 1773.9759 | 887.4916        | 1756.9493 | 878.9783         | 1755.9653      | 878.4863         | 15 |
| 8  | 899.4621  | 450.2347        |           |                  | 881.4516       | 441.2294         | V    | 1636.9170 | 818.9621        | 1619.8904 | 810.4488         | 1618.9064      | 809.9568         | 14 |
| 9  | 1012.5462 | 506.7767        |           |                  | 994.5356       | 497.7715         | L    | 1537.8485 | 769.4279        | 1520.8220 | 760.9146         | 1519.8380      | 760.4226         | 13 |
| 10 | 1140.6412 | 570.8242        | 1123.6146 | 562.3109         | 1122.6306      | 561.8189         | K    | 1424.7645 | 712.8859        | 1407.7379 | 704.3726         | 1406.7539      | 703.8806         | 12 |
| 11 | 1237.6939 | 619.3506        | 1220.6674 | 610.8373         | 1219.6834      | 610.3453         | P    | 1296.6695 | 648.8384        | 1279.6430 | 640.3251         | 1278.6589      | 639.8331         | 11 |
| 12 | 1384.7623 | 692.8848        | 1367.7358 | 684.3715         | 1366.7518      | 683.8795         | F    | 1199.6167 | 600.3120        | 1182.5902 | 591.7987         | 1181.6062      | 591.3067         | 10 |
| 13 | 1481.8151 | 741.4112        | 1464.7886 | 732.8979         | 1463.8045      | 732.4059         | P    | 1052.5483 | 526.7778        | 1035.5218 | 518.2645         | 1034.5378      | 517.7725         | 9  |
| 14 | 1582.8628 | 791.9350        | 1565.8362 | 783.4218         | 1564.8522      | 782.9298         | T    | 955.4956  | 478.2514        | 938.4690  | 469.7381         | 937.4850       | 469.2461         | 8  |
| 15 | 1719.9217 | 860.4645        | 1702.8952 | 851.9512         | 1701.9111      | 851.4592         | H    | 854.4479  | 427.7276        | 837.4213  | 419.2143         | 836.4373       | 418.7223         | 7  |
| 16 | 1833.0058 | 917.0065        | 1815.9792 | 908.4932         | 1814.9952      | 908.0012         | I    | 717.3890  | 359.1981        | 700.3624  | 350.6849         | 699.3784       | 350.1928         | 6  |
| 17 | 1934.0534 | 967.5304        | 1917.0269 | 959.0171         | 1916.0429      | 958.5251         | T    | 604.3049  | 302.6561        | 587.2784  | 294.1428         | 586.2944       | 293.6508         | 5  |
| 18 | 2062.1120 | 1031.5597       | 2045.0855 | 1023.0464        | 2044.1015      | 1022.5544        | Q    | 503.2572  | 252.1323        | 486.2307  | 243.6190         | 485.2467       | 243.1270         | 4  |
| 19 | 2133.1491 | 1067.0782       | 2116.1226 | 1058.5649        | 2115.1386      | 1058.0729        | A    | 375.1987  | 188.1030        | 358.1721  | 179.5897         | 357.1881       | 179.0977         | 3  |
| 20 | 2262.1917 | 1131.5995       | 2245.1652 | 1123.0862        | 2244.1812      | 1122.5942        | E    | 304.1615  | 152.5844        | 287.1350  | 144.0711         | 286.1510       | 143.5791         | 2  |
| 21 |           |                 |           |                  |                |                  | R    | 175.1190  | 88.0631         | 158.0924  | 79.5498          |                |                  | 1  |



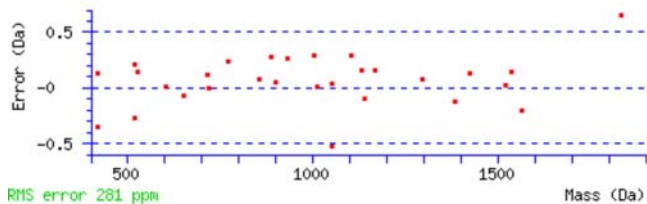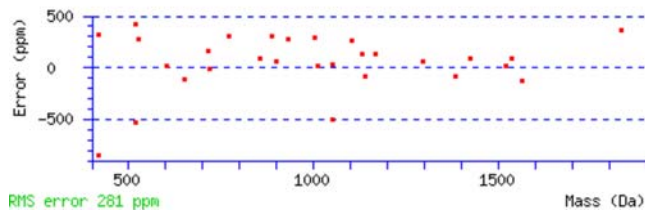

NCBI BLAST search of [VETVFSHVLKPFPTHITQAER](#)

(Parameters: blastp, nr protein database, expect=20000, no filter, PAM30)

Other BLAST [web gateways](#)

**All matches to this query**

| Score | Mr(calc): | Delta   | Sequence                                  |
|-------|-----------|---------|-------------------------------------------|
| 53.3  | 2435.2961 | 0.4966  | <a href="#">VETVFSHVLKPFPTHITQAER</a>     |
| 4.8   | 2438.2765 | -2.4838 | <a href="#">QTPANEQSSQPQELKATLSLLR</a>    |
| 4.4   | 2438.1471 | -2.3544 | <a href="#">TQSSGPCHSFHAQPLSLPCSLK</a>    |
| 4.2   | 2437.1002 | -1.3075 | <a href="#">EMCGISALPPGNASPPEGAGSPGER</a> |
| 4.0   | 2436.1202 | -0.3275 | <a href="#">VGDHSSPYGLQEYRPQMDMVK</a>     |
| 3.3   | 2437.1123 | -1.3196 | <a href="#">MSSCPHVSPAGILCVADQCHGLR</a>   |
| 2.9   | 2435.1477 | 0.6451  | <a href="#">VEVSAPFTFCGMDCFGPFVVKR</a>    |
| 1.5   | 2435.0699 | 0.7228  | <a href="#">GDPNCSQYYGGPELEPPTAQQK</a>    |

Mascot: <http://www.matrixscience.com/>

**MASCOT** **SCIENCE** Mascot Search Results

**Peptide View**

MS/MS Fragmentation of **VGAGAPVYLAAVLEYLTAEILELAGNAAR**

Found in [gi|41055102|ref|NP\\_957367.1](#), H2A histone family, member X [Danio rerio]

Match to Query 106568: 2914.652724 from(972.558184,3+) index(16305)

Data file TCDD\_0530.dta

Click mouse within plot area to zoom in by factor of two about that point

Or, Plot from  to  Da

Label all possible matches  Label matches used for scoring

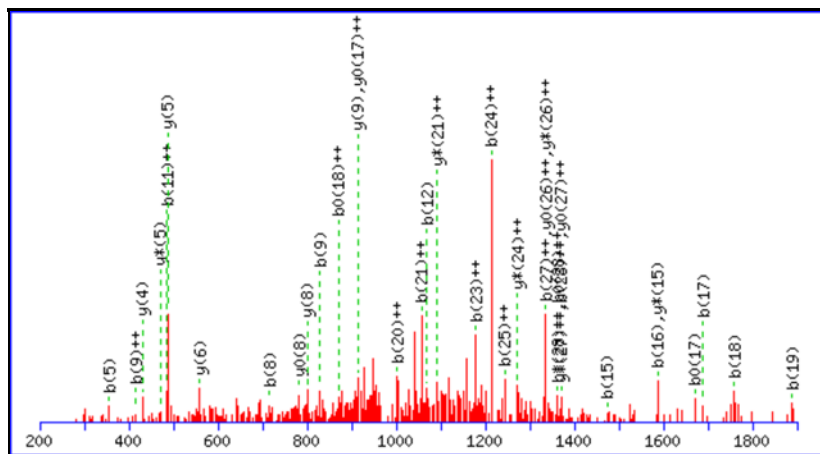

Monoisotopic mass of neutral peptide Mr(calc): 2914.5804

Ions Score: 41 Expect: 0.01

Matches : 37/246 fragment ions using 80 most intense peaks ([help](#))

| #  | b         | b <sup>++</sup> | b* | b <sup>*++</sup> | b <sup>0</sup> | b <sup>0++</sup> | Seq. | y         | y <sup>++</sup> | y*        | y <sup>*++</sup> | y <sup>0</sup> | y <sup>0++</sup> | #  |
|----|-----------|-----------------|----|------------------|----------------|------------------|------|-----------|-----------------|-----------|------------------|----------------|------------------|----|
| 1  | 100.0757  | 50.5415         |    |                  |                |                  | V    |           |                 |           |                  |                |                  | 29 |
| 2  | 157.0972  | 79.0522         |    |                  |                |                  | G    | 2816.5193 | 1408.7633       | 2799.4927 | 1400.2500        | 2798.5087      | 1399.7580        | 28 |
| 3  | 228.1343  | 114.5708        |    |                  |                |                  | A    | 2759.4978 | 1380.2525       | 2742.4713 | 1371.7393        | 2741.4872      | 1371.2473        | 27 |
| 4  | 285.1557  | 143.0815        |    |                  |                |                  | G    | 2688.4607 | 1344.7340       | 2671.4341 | 1336.2207        | 2670.4501      | 1335.7287        | 26 |
| 5  | 356.1928  | 178.6001        |    |                  |                |                  | A    | 2631.4392 | 1316.2233       | 2614.4127 | 1307.7100        | 2613.4287      | 1307.2180        | 25 |
| 6  | 453.2456  | 227.1264        |    |                  |                |                  | P    | 2560.4021 | 1280.7047       | 2543.3756 | 1272.1914        | 2542.3916      | 1271.6994        | 24 |
| 7  | 552.3140  | 276.6607        |    |                  |                |                  | V    | 2463.3494 | 1232.1783       | 2446.3228 | 1223.6650        | 2445.3388      | 1223.1730        | 23 |
| 8  | 715.3774  | 358.1923        |    |                  |                |                  | Y    | 2364.2809 | 1182.6441       | 2347.2544 | 1174.1308        | 2346.2704      | 1173.6388        | 22 |
| 9  | 828.4614  | 414.7343        |    |                  |                |                  | L    | 2201.2176 | 1101.1124       | 2184.1911 | 1092.5992        | 2183.2070      | 1092.1072        | 21 |
| 10 | 899.4985  | 450.2529        |    |                  |                |                  | A    | 2088.1335 | 1044.5704       | 2071.1070 | 1036.0571        | 2070.1230      | 1035.5651        | 20 |
| 11 | 970.5356  | 485.7715        |    |                  |                |                  | A    | 2017.0964 | 1009.0519       | 2000.0699 | 1000.5386        | 1999.0859      | 1000.0466        | 19 |
| 12 | 1069.6041 | 535.3057        |    |                  |                |                  | V    | 1946.0593 | 973.5333        | 1929.0328 | 965.0200         | 1928.0488      | 964.5280         | 18 |
| 13 | 1182.6881 | 591.8477        |    |                  |                |                  | L    | 1846.9909 | 923.9991        | 1829.9644 | 915.4858         | 1828.9803      | 914.9938         | 17 |
| 14 | 1311.7307 | 656.3690        |    |                  | 1293.7202      | 647.3637         | E    | 1733.9068 | 867.4571        | 1716.8803 | 858.9438         | 1715.8963      | 858.4518         | 16 |
| 15 | 1474.7940 | 737.9007        |    |                  | 1456.7835      | 728.8954         | Y    | 1604.8642 | 802.9358        | 1587.8377 | 794.4225         | 1586.8537      | 793.9305         | 15 |
| 16 | 1587.8781 | 794.4427        |    |                  | 1569.8675      | 785.4374         | L    | 1441.8009 | 721.4041        | 1424.7744 | 712.8908         | 1423.7904      | 712.3988         | 14 |
| 17 | 1688.9258 | 844.9665        |    |                  | 1670.9152      | 835.9612         | T    | 1328.7169 | 664.8621        | 1311.6903 | 656.3488         | 1310.7063      | 655.8568         | 13 |
| 18 | 1759.9629 | 880.4851        |    |                  | 1741.9523      | 871.4798         | A    | 1227.6692 | 614.3382        | 1210.6426 | 605.8250         | 1209.6586      | 605.3329         | 12 |
| 19 | 1889.0055 | 945.0064        |    |                  | 1870.9949      | 936.0011         | E    | 1156.6321 | 578.8197        | 1139.6055 | 570.3064         | 1138.6215      | 569.8144         | 11 |
| 20 | 2002.0896 | 1001.5484       |    |                  | 1984.0790      | 992.5431         | I    | 1027.5895 | 514.2984        | 1010.5629 | 505.7851         | 1009.5789      | 505.2931         | 10 |
| 21 | 2115.1736 | 1058.0904       |    |                  | 2097.1631      | 1049.0852        | L    | 914.5054  | 457.7563        | 897.4789  | 449.2431         | 896.4948       | 448.7511         | 9  |
| 22 | 2244.2162 | 1122.6117       |    |                  | 2226.2057      | 1113.6065        | E    | 801.4213  | 401.2143        | 784.3948  | 392.7010         | 783.4108       | 392.2090         | 8  |
| 23 | 2357.3003 | 1179.1538       |    |                  | 2339.2897      | 1170.1485        | L    | 672.3787  | 336.6930        | 655.3522  | 328.1797         |                |                  | 7  |
| 24 | 2428.3374 | 1214.6723       |    |                  | 2410.3268      | 1205.6671        | A    | 559.2947  | 280.1510        | 542.2681  | 271.6377         |                |                  | 6  |

|    |           |                  |           |                  |           |                  |   |                 |          |                 |          |  |  |   |
|----|-----------|------------------|-----------|------------------|-----------|------------------|---|-----------------|----------|-----------------|----------|--|--|---|
| 25 | 2485.3589 | <b>1243.1831</b> |           |                  | 2467.3483 | 1234.1778        | G | <b>488.2576</b> | 244.6324 | <b>471.2310</b> | 236.1191 |  |  | 5 |
| 26 | 2599.4018 | 1300.2045        | 2582.3752 | 1291.6913        | 2581.3912 | 1291.1992        | N | <b>431.2361</b> | 216.1217 | 414.2096        | 207.6084 |  |  | 4 |
| 27 | 2670.4389 | <b>1335.7231</b> | 2653.4123 | 1327.2098        | 2652.4283 | 1326.7178        | A | 317.1932        | 159.1002 | 300.1666        | 150.5870 |  |  | 3 |
| 28 | 2741.4760 | <b>1371.2416</b> | 2724.4495 | <b>1362.7284</b> | 2723.4654 | <b>1362.2364</b> | A | 246.1561        | 123.5817 | 229.1295        | 115.0684 |  |  | 2 |
| 29 |           |                  |           |                  |           |                  | R | 175.1190        | 88.0631  | 158.0924        | 79.5498  |  |  | 1 |

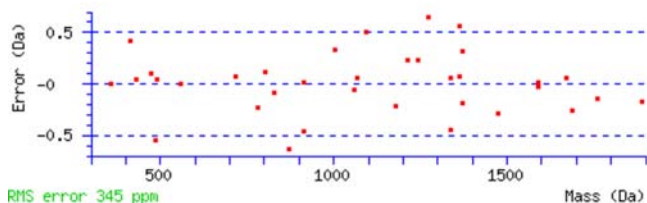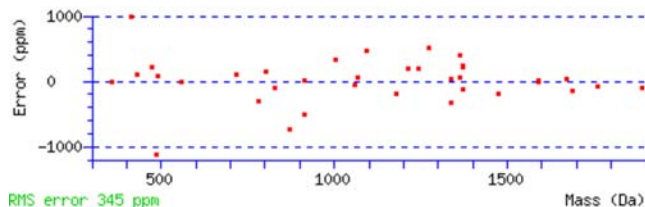

NCBI BLAST search of [VGAGAPVYLAHVLEYLTAIELELAGNAAR](#)  
 (Parameters: blastp, nr protein database, expect=20000, no filter, PAM30)

Other BLAST [web gateways](#)

**All matches to this query**

| Score | Mr(calc): | Delta   | Sequence                                      |
|-------|-----------|---------|-----------------------------------------------|
| 41.1  | 2914.5804 | 0.0724  | <a href="#">VGAGAPVYLAHVLEYLTAIELELAGNAAR</a> |
| 14.1  | 2914.4295 | 0.2232  | <a href="#">SSDVDLPSASLKTDIOTPDASLDSPDLK</a>  |
| 6.3   | 2915.2688 | -0.6161 | <a href="#">MFCSFVFICFCCSCLFGVFADSGVVK</a>    |
| 2.5   | 2915.3306 | -0.6778 | <a href="#">QYPVALMCDVEKMFHQFHVHDADR</a>      |
| 2.2   | 2912.4226 | 2.2302  | <a href="#">ELDLSENNLGDFGVKLLSAGLEDPHCK</a>   |
| 2.0   | 2916.4480 | -1.7953 | <a href="#">FPDKHVFSLEIVPDHEPVLNNMPK</a>      |
| 1.9   | 2915.2688 | -0.6161 | <a href="#">MFCSFVFICFCCSCLFGVFADSGVVK</a>    |
| 1.9   | 2915.2688 | -0.6161 | <a href="#">MFCSFVFICFCCSCLFGVFADSGVVK</a>    |
| 1.9   | 2915.2688 | -0.6161 | <a href="#">MFCSFVFICFCCSCLFGVFADSGVVK</a>    |
| 0.7   | 2916.3283 | -1.6756 | <a href="#">KTIVCFAQHPCFSNESHENQAENVK</a>     |

Mascot: <http://www.matrixscience.com/>

# MASCOT SCIENCE Mascot Search Results

## Peptide View

MS/MS Fragmentation of **VHLVGIDIFTNK**

Found in [gi|47085971|ref|NP\\_998350.1](#), eukaryotic translation initiation factor 5A [Danio rerio]

Match to Query 19008: 1354.702724 from(678.358638,2+) index(128942)

Data file TCDD\_0530.dta

Click mouse within plot area to zoom in by factor of two about that point

Or, Plot from  to  Da

Label all possible matches  Label matches used for scoring

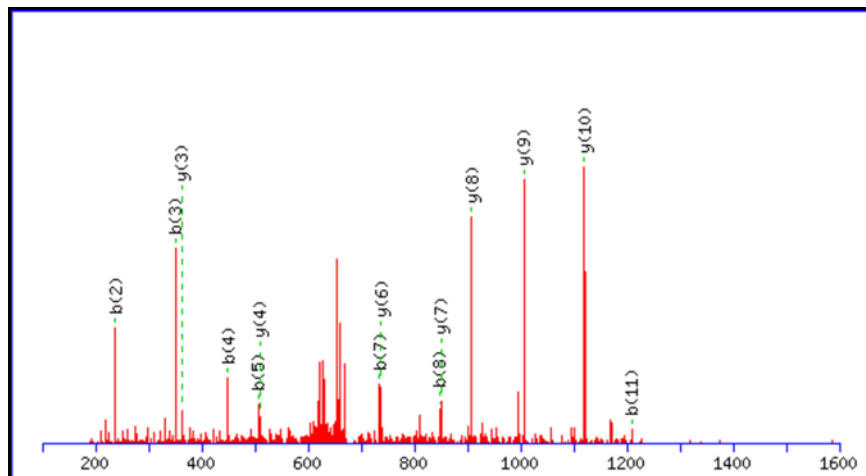

Monoisotopic mass of neutral peptide Mr(calc): 1354.7609

Ions Score: 54 Expect: 0.0011

Matches : 14/96 fragment ions using 24 most intense peaks ([help](#))

| #  | b                | b <sup>++</sup> | b*        | b <sup>*++</sup> | b <sup>0</sup> | b <sup>0++</sup> | Seq. | y                | y <sup>++</sup> | y*        | y <sup>*++</sup> | y <sup>0</sup> | y <sup>0++</sup> | #  |
|----|------------------|-----------------|-----------|------------------|----------------|------------------|------|------------------|-----------------|-----------|------------------|----------------|------------------|----|
| 1  | 100.0757         | 50.5415         |           |                  |                |                  | V    |                  |                 |           |                  |                |                  | 12 |
| 2  | <b>237.1346</b>  | 119.0709        |           |                  |                |                  | H    | 1256.6997        | 628.8535        | 1239.6732 | 620.3402         | 1238.6892      | 619.8482         | 11 |
| 3  | <b>350.2187</b>  | 175.6130        |           |                  |                |                  | L    | <b>1119.6408</b> | 560.3241        | 1102.6143 | 551.8108         | 1101.6303      | 551.3188         | 10 |
| 4  | <b>449.2871</b>  | 225.1472        |           |                  |                |                  | V    | <b>1006.5568</b> | 503.7820        | 989.5302  | 495.2688         | 988.5462       | 494.7767         | 9  |
| 5  | <b>506.3085</b>  | 253.6579        |           |                  |                |                  | G    | <b>907.4884</b>  | 454.2478        | 890.4618  | 445.7345         | 889.4778       | 445.2425         | 8  |
| 6  | 619.3926         | 310.1999        |           |                  |                |                  | I    | <b>850.4669</b>  | 425.7371        | 833.4403  | 417.2238         | 832.4563       | 416.7318         | 7  |
| 7  | <b>734.4196</b>  | 367.7134        |           |                  | 716.4090       | 358.7081         | D    | <b>737.3828</b>  | 369.1951        | 720.3563  | 360.6818         | 719.3723       | 360.1898         | 6  |
| 8  | <b>847.5036</b>  | 424.2554        |           |                  | 829.4930       | 415.2502         | I    | 622.3559         | 311.6816        | 605.3293  | 303.1683         | 604.3453       | 302.6763         | 5  |
| 9  | 994.5720         | 497.7897        |           |                  | 976.5615       | 488.7844         | F    | <b>509.2718</b>  | 255.1395        | 492.2453  | 246.6263         | 491.2613       | 246.1343         | 4  |
| 10 | 1095.6197        | 548.3135        |           |                  | 1077.6091      | 539.3082         | T    | <b>362.2034</b>  | 181.6053        | 345.1769  | 173.0921         | 344.1928       | 172.6001         | 3  |
| 11 | <b>1209.6626</b> | 605.3350        | 1192.6361 | 596.8217         | 1191.6521      | 596.3297         | N    | 261.1557         | 131.0815        | 244.1292  | 122.5682         |                |                  | 2  |
| 12 |                  |                 |           |                  |                |                  | K    | 147.1128         | 74.0600         | 130.0863  | 65.5468          |                |                  | 1  |

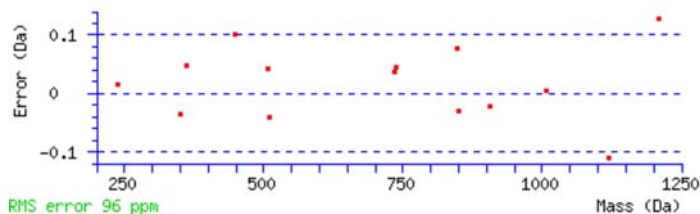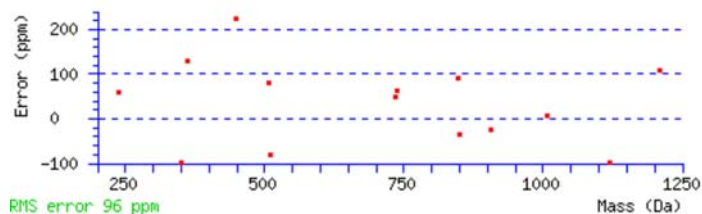

NCBI BLAST search of [VHLVGIDIFTNK](#)

(Parameters: blastp, nr protein database, expect=20000, no filter, PAM30)

Other BLAST [web gateways](#)

**All matches to this query**

| Score | Mr(calc): | Delta   | Sequence                       |
|-------|-----------|---------|--------------------------------|
| 54.0  | 1354.7609 | -0.0582 | <a href="#">VHLVGIDIFTNK</a>   |
| 8.9   | 1354.7027 | 0.0000  | <a href="#">DINMKPTPNGIR</a>   |
| 7.7   | 1354.7027 | -0.0000 | <a href="#">HVLKGQDTGCLK</a>   |
| 7.1   | 1354.6737 | 0.0290  | <a href="#">DYAVVMCRLGTK</a>   |
| 5.9   | 1355.6391 | -0.9364 | <a href="#">VHPDSSVTLCEL</a>   |
| 4.3   | 1355.6429 | -0.9402 | <a href="#">RYTTAGNSGSSAGK</a> |
| 4.2   | 1354.5823 | 0.1204  | <a href="#">FDVDSACAGESVR</a>  |
| 2.6   | 1356.5326 | -1.8299 | <a href="#">DCEESLNFLCQ</a>    |
| 2.3   | 1356.5148 | -1.8121 | <a href="#">MECQECPEGFK</a>    |
| 2.3   | 1355.6027 | -0.9000 | <a href="#">NEYAEKDCASVK</a>   |

Mascot: <http://www.matrixscience.com/>

**MASCOT** Mascot Search Results

**Peptide View**

MS/MS Fragmentation of **VLPGVDTVGHHEEEQGGK**

Found in [gi|62955301|ref|NP\\_001017662.1](#), hypothetical protein LOC550355 [Danio rerio]

Match to Query 37936: 1849.322724 from(925.668638,2+) index(19397)

Data file TCDD\_0530.dta

Click mouse within plot area to zoom in by factor of two about that point

Or, Plot from  to  Da

Label all possible matches  Label matches used for scoring

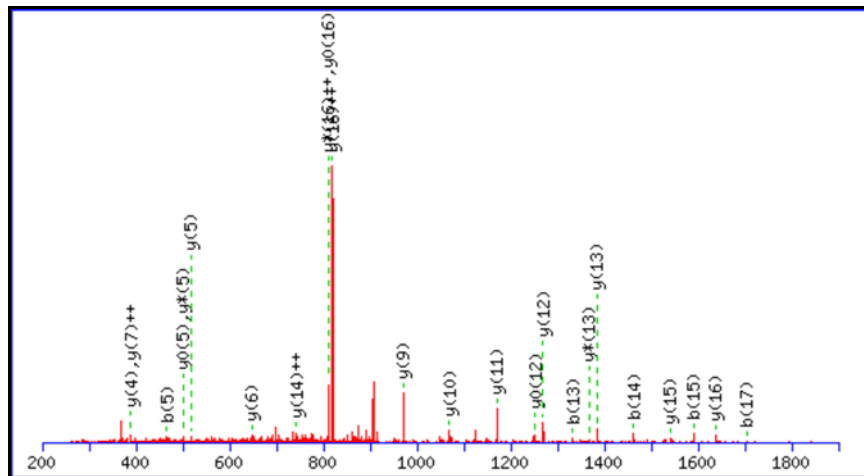

Monoisotopic mass of neutral peptide Mr(calc): 1848.9218

Ions Score: 53 Expect: 0.0011

Matches : 24/158 fragment ions using 47 most intense peaks ([help](#))

| #  | b         | b <sup>++</sup> | b <sup>*</sup> | b <sup>*++</sup> | b <sup>0</sup> | b <sup>0++</sup> | Seq. | y         | y <sup>++</sup> | y <sup>*</sup> | y <sup>*++</sup> | y <sup>0</sup> | y <sup>0++</sup> | #  |
|----|-----------|-----------------|----------------|------------------|----------------|------------------|------|-----------|-----------------|----------------|------------------|----------------|------------------|----|
| 1  | 100.0757  | 50.5415         |                |                  |                |                  | V    |           |                 |                |                  |                |                  | 18 |
| 2  | 213.1598  | 107.0835        |                |                  |                |                  | L    | 1750.8606 | 875.9339        | 1733.8341      | 867.4207         | 1732.8501      | 866.9287         | 17 |
| 3  | 310.2125  | 155.6099        |                |                  |                |                  | P    | 1637.7766 | 819.3919        | 1620.7500      | 810.8786         | 1619.7660      | 810.3866         | 16 |
| 4  | 367.2340  | 184.1206        |                |                  |                |                  | G    | 1540.7238 | 770.8655        | 1523.6972      | 762.3523         | 1522.7132      | 761.8603         | 15 |
| 5  | 466.3024  | 233.6548        |                |                  |                |                  | V    | 1483.7023 | 742.3548        | 1466.6758      | 733.8415         | 1465.6918      | 733.3495         | 14 |
| 6  | 581.3293  | 291.1683        |                |                  | 563.3188       | 282.1630         | D    | 1384.6339 | 692.8206        | 1367.6074      | 684.3073         | 1366.6234      | 683.8153         | 13 |
| 7  | 680.3978  | 340.7025        |                |                  | 662.3872       | 331.6972         | V    | 1269.6070 | 635.3071        | 1252.5804      | 626.7938         | 1251.5964      | 626.3018         | 12 |
| 8  | 781.4454  | 391.2264        |                |                  | 763.4349       | 382.2211         | T    | 1170.5386 | 585.7729        | 1153.5120      | 577.2596         | 1152.5280      | 576.7676         | 11 |
| 9  | 880.5138  | 440.7606        |                |                  | 862.5033       | 431.7553         | V    | 1069.4909 | 535.2491        | 1052.4643      | 526.7358         | 1051.4803      | 526.2438         | 10 |
| 10 | 937.5353  | 469.2713        |                |                  | 919.5247       | 460.2660         | G    | 970.4225  | 485.7149        | 953.3959       | 477.2016         | 952.4119       | 476.7096         | 9  |
| 11 | 1074.5942 | 537.8007        |                |                  | 1056.5837      | 528.7955         | H    | 913.4010  | 457.2041        | 896.3745       | 448.6909         | 895.3904       | 448.1989         | 8  |
| 12 | 1203.6368 | 602.3220        |                |                  | 1185.6263      | 593.3168         | E    | 776.3421  | 388.6747        | 759.3155       | 380.1614         | 758.3315       | 379.6694         | 7  |
| 13 | 1332.6794 | 666.8433        |                |                  | 1314.6688      | 657.8381         | E    | 647.2995  | 324.1534        | 630.2729       | 315.6401         | 629.2889       | 315.1481         | 6  |
| 14 | 1461.7220 | 731.3646        |                |                  | 1443.7114      | 722.3594         | E    | 518.2569  | 259.6321        | 501.2304       | 251.1188         | 500.2463       | 250.6268         | 5  |
| 15 | 1589.7806 | 795.3939        | 1572.7540      | 786.8807         | 1571.7700      | 786.3886         | Q    | 389.2143  | 195.1108        | 372.1878       | 186.5975         |                |                  | 4  |
| 16 | 1646.8020 | 823.9047        | 1629.7755      | 815.3914         | 1628.7915      | 814.8994         | G    | 261.1557  | 131.0815        | 244.1292       | 122.5682         |                |                  | 3  |
| 17 | 1703.8235 | 852.4154        | 1686.7970      | 843.9021         | 1685.8129      | 843.4101         | G    | 204.1343  | 102.5708        | 187.1077       | 94.0575          |                |                  | 2  |
| 18 |           |                 |                |                  |                |                  | K    | 147.1128  | 74.0600         | 130.0863       | 65.5468          |                |                  | 1  |

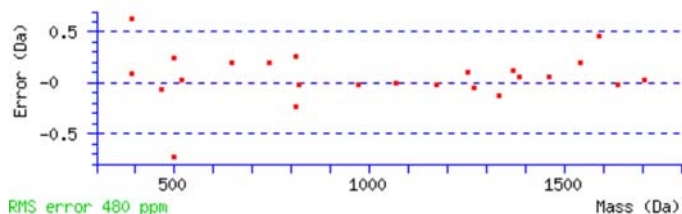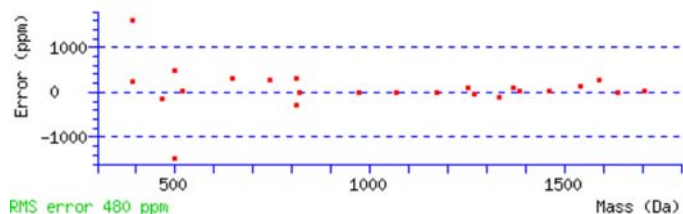

NCBI BLAST search of [VLPGVDTVGHHEEQGGK](#)  
 (Parameters: blastp, nr protein database, expect=20000, no filter, PAM30)  
 Other BLAST [web gateways](#)

**All matches to this query**

| Score | Mr(calc): | Delta   | Sequence                           |
|-------|-----------|---------|------------------------------------|
| 53.2  | 1848.9218 | 0.4009  | <a href="#">VLPGVDTVGHHEEQGGK</a>  |
| 3.0   | 1848.8936 | 0.4291  | <a href="#">LVMKPIHECTYCDIK</a>    |
| 3.0   | 1849.9760 | -0.6533 | <a href="#">FCQFINEQSPVKLLK</a>    |
| 2.9   | 1850.0010 | -0.6783 | <a href="#">DVTREAATNGVLLHLNK</a>  |
| 2.9   | 1850.8745 | -1.5518 | <a href="#">IDSSDTTVSLNEDTINK</a>  |
| 2.8   | 1850.8283 | -1.5056 | <a href="#">NDDHVVGVTDNPPTEDEK</a> |
| 2.8   | 1848.8936 | 0.4291  | <a href="#">LVMKPIHECTYCDIK</a>    |
| 2.7   | 1850.8152 | -1.4925 | <a href="#">VCWVCNGSGSRLNDER</a>   |
| 1.8   | 1846.9247 | 2.3980  | <a href="#">EEKCTYELSAVLIHR</a>    |
| 1.4   | 1849.9648 | -0.6421 | <a href="#">ELFQPFQKVVVECDIVK</a>  |

Mascot: <http://www.matrixscience.com/>

**Peptide View**

MS/MS Fragmentation of **VLQATVVAVGPGSTNK**

Found in [gi|55926092|ref|NP\\_571601.1](#), heat shock 10kD protein 1 (chaperonin 10) [Danio rerio]

Match to Query 24348: 1539.542724 from(770.778638,2+) index(7983)

Data file TCDD\_0530.dta

Click mouse within plot area to zoom in by factor of two about that point

Or, Plot from  to  Da

Label all possible matches  Label matches used for scoring

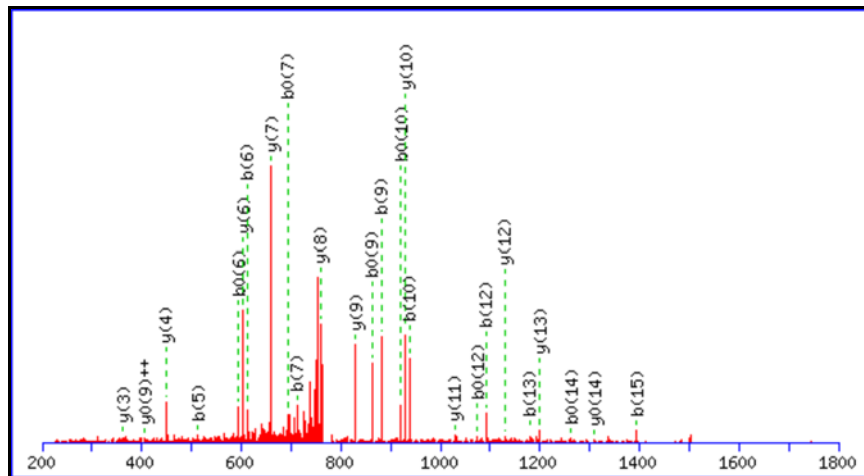

Monoisotopic mass of neutral peptide Mr(calc): 1539.8621

Ions Score: 48 Expect: 0.0038

Matches : 26/164 fragment ions using 65 most intense peaks ([help](#))

| #  | b         | b <sup>++</sup> | b*        | b <sup>+++</sup> | b <sup>0</sup> | b <sup>0++</sup> | Seq. | y         | y <sup>++</sup> | y*        | y <sup>+++</sup> | y <sup>0</sup> | y <sup>0++</sup> | #  |
|----|-----------|-----------------|-----------|------------------|----------------|------------------|------|-----------|-----------------|-----------|------------------|----------------|------------------|----|
| 1  | 100.0757  | 50.5415         |           |                  |                |                  | V    |           |                 |           |                  |                |                  | 16 |
| 2  | 213.1598  | 107.0835        |           |                  |                |                  | L    | 1441.8009 | 721.4041        | 1424.7744 | 712.8908         | 1423.7904      | 712.3988         | 15 |
| 3  | 341.2183  | 171.1128        | 324.1918  | 162.5995         |                |                  | Q    | 1328.7169 | 664.8621        | 1311.6903 | 656.3488         | 1310.7063      | 655.8568         | 14 |
| 4  | 412.2554  | 206.6314        | 395.2289  | 198.1181         |                |                  | A    | 1200.6583 | 600.8328        | 1183.6317 | 592.3195         | 1182.6477      | 591.8275         | 13 |
| 5  | 513.3031  | 257.1552        | 496.2766  | 248.6419         | 495.2926       | 248.1499         | T    | 1129.6212 | 565.3142        | 1112.5946 | 556.8009         | 1111.6106      | 556.3089         | 12 |
| 6  | 612.3715  | 306.6894        | 595.3450  | 298.1761         | 594.3610       | 297.6841         | V    | 1028.5735 | 514.7904        | 1011.5469 | 506.2771         | 1010.5629      | 505.7851         | 11 |
| 7  | 711.4400  | 356.2236        | 694.4134  | 347.7103         | 693.4294       | 347.2183         | V    | 929.5051  | 465.2562        | 912.4785  | 456.7429         | 911.4945       | 456.2509         | 10 |
| 8  | 782.4771  | 391.7422        | 765.4505  | 383.2289         | 764.4665       | 382.7369         | A    | 830.4367  | 415.7220        | 813.4101  | 407.2087         | 812.4261       | 406.7167         | 9  |
| 9  | 881.5455  | 441.2764        | 864.5189  | 432.7631         | 863.5349       | 432.2711         | V    | 759.3995  | 380.2034        | 742.3730  | 371.6901         | 741.3890       | 371.1981         | 8  |
| 10 | 938.5669  | 469.7871        | 921.5404  | 461.2738         | 920.5564       | 460.7818         | G    | 660.3311  | 330.6692        | 643.3046  | 322.1559         | 642.3206       | 321.6639         | 7  |
| 11 | 1035.6197 | 518.3135        | 1018.5932 | 509.8002         | 1017.6091      | 509.3082         | P    | 603.3097  | 302.1585        | 586.2831  | 293.6452         | 585.2991       | 293.1532         | 6  |
| 12 | 1092.6412 | 546.8242        | 1075.6146 | 538.3109         | 1074.6306      | 537.8189         | G    | 506.2569  | 253.6321        | 489.2304  | 245.1188         | 488.2463       | 244.6268         | 5  |
| 13 | 1179.6732 | 590.3402        | 1162.6467 | 581.8270         | 1161.6626      | 581.3350         | S    | 449.2354  | 225.1214        | 432.2089  | 216.6081         | 431.2249       | 216.1161         | 4  |
| 14 | 1280.7209 | 640.8641        | 1263.6943 | 632.3508         | 1262.7103      | 631.8588         | T    | 362.2034  | 181.6053        | 345.1769  | 173.0921         | 344.1928       | 172.6001         | 3  |
| 15 | 1394.7638 | 697.8855        | 1377.7373 | 689.3723         | 1376.7532      | 688.8803         | N    | 261.1557  | 131.0815        | 244.1292  | 122.5682         |                |                  | 2  |
| 16 |           |                 |           |                  |                |                  | K    | 147.1128  | 74.0600         | 130.0863  | 65.5468          |                |                  | 1  |



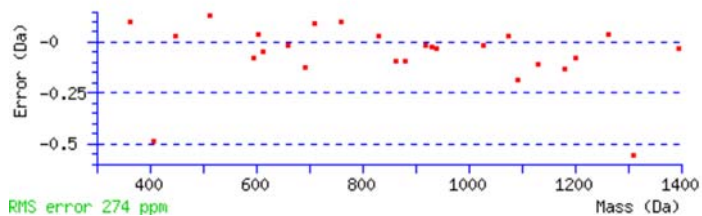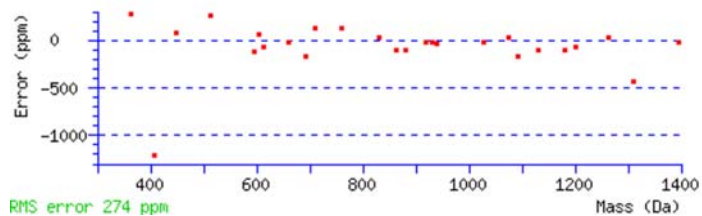

NCBI BLAST search of [VLQATVVAVGPGSTNK](#)

(Parameters: blastp, nr protein database, expect=20000, no filter, PAM30)

Other BLAST [web gateways](#)

**All matches to this query**

| Score | Mr(calc): | Delta   | Sequence                         |
|-------|-----------|---------|----------------------------------|
| 48.4  | 1539.8621 | -0.3194 | <a href="#">VLQATVVAVGPGSTNK</a> |
| 24.6  | 1539.8079 | -0.2652 | <a href="#">VLAATTCTPAHLNTK</a>  |
| 15.4  | 1539.7351 | -0.1924 | <a href="#">EESCYVTAGNALRK</a>   |
| 12.1  | 1539.7893 | -0.2466 | <a href="#">TSITSLGTSFRDQK</a>   |
| 6.9   | 1537.7493 | 1.7934  | <a href="#">DIRQFVAACSVCAR</a>   |
| 5.8   | 1538.8417 | 0.7011  | <a href="#">TTGSGAQEPVVPKLR</a>  |
| 5.0   | 1538.9396 | 0.6032  | <a href="#">VLKVLSGALANVDIK</a>  |
| 4.6   | 1539.7834 | -0.2407 | <a href="#">TFITFSALFShNR</a>    |
| 4.2   | 1537.7922 | 1.7505  | <a href="#">YLECSALTQRGLK</a>    |
| 3.6   | 1537.6388 | 1.9039  | <a href="#">DADNPESQMTICK</a>    |

Mascot: <http://www.matrixscience.com/>

**MASCOT** SCIENCE Mascot Search Results

Peptide View

MS/MS Fragmentation of **VLRPQVSAVPQHAQGESAEPADLK**

Found in [gi|112363126|ref|NP\\_001036210.1](#), dynein, cytoplasmic 1, heavy chain 1 [Danio rerio]

Match to Query 101044: 2527.162725 from(843.394851,3+) index(36511)

Data file TCDD\_0531.dta

Click mouse within plot area to zoom in by factor of two about that point

Or, Plot from  to  Da

Label all possible matches  Label matches used for scoring

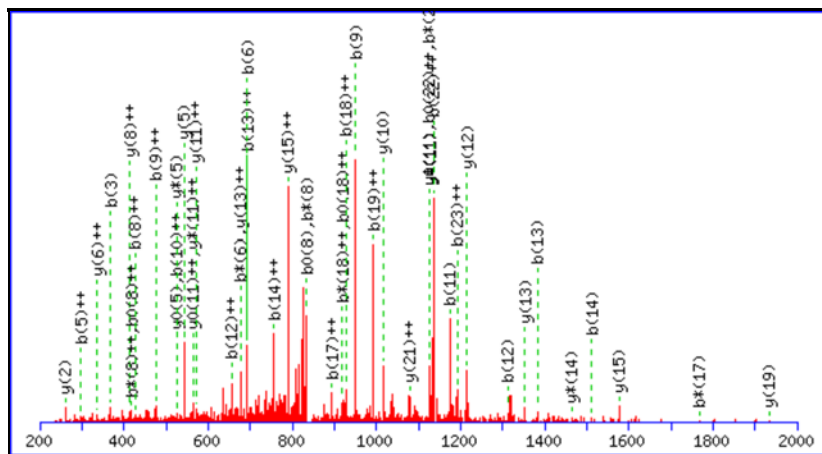

Monoisotopic mass of neutral peptide Mr(calc): 2526.3190

Ions Score: 41 Expect: 0.013

Matches : 49/256 fragment ions using 107 most intense peaks ([help](#))

| #  | b                | b <sup>++</sup>  | b*               | b <sup>*++</sup> | b <sup>0</sup>  | b <sup>0++</sup> | Seq. | y                | y <sup>++</sup>  | y*               | y <sup>*++</sup> | y <sup>0</sup>   | y <sup>0++</sup> | #  |
|----|------------------|------------------|------------------|------------------|-----------------|------------------|------|------------------|------------------|------------------|------------------|------------------|------------------|----|
| 1  | 100.0757         | 50.5415          |                  |                  |                 |                  | V    |                  |                  |                  |                  |                  |                  | 24 |
| 2  | 213.1598         | 107.0835         |                  |                  |                 |                  | L    | 2428.2579        | 1214.6326        | 2411.2314        | 1206.1193        | 2410.2473        | 1205.6273        | 23 |
| 3  | <b>369.2609</b>  | 185.1341         | 352.2343         | 176.6208         |                 |                  | R    | 2315.1738        | 1158.0906        | 2298.1473        | 1149.5773        | 2297.1633        | 1149.0853        | 22 |
| 4  | 466.3136         | 233.6605         | 449.2871         | 225.1472         |                 |                  | P    | 2159.0727        | <b>1080.0400</b> | 2142.0462        | 1071.5267        | 2141.0622        | 1071.0347        | 21 |
| 5  | 594.3722         | <b>297.6897</b>  | 577.3457         | 289.1765         |                 |                  | Q    | 2062.0200        | 1031.5136        | 2044.9934        | 1023.0004        | 2044.0094        | 1022.5083        | 20 |
| 6  | <b>693.4406</b>  | 347.2239         | <b>676.4141</b>  | 338.7107         |                 |                  | V    | <b>1933.9614</b> | 967.4843         | 1916.9348        | 958.9711         | 1915.9508        | 958.4791         | 19 |
| 7  | 780.4726         | 390.7400         | 763.4461         | 382.2267         | 762.4621        | 381.7347         | S    | 1834.8930        | 917.9501         | 1817.8664        | 909.4369         | 1816.8824        | 908.9448         | 18 |
| 8  | 851.5098         | <b>426.2585</b>  | <b>834.4832</b>  | <b>417.7452</b>  | <b>833.4992</b> | <b>417.2532</b>  | A    | 1747.8610        | 874.4341         | 1730.8344        | 865.9208         | 1729.8504        | 865.4288         | 17 |
| 9  | <b>950.5782</b>  | <b>475.7927</b>  | 933.5516         | 467.2795         | 932.5676        | 466.7874         | V    | 1676.8238        | 838.9156         | 1659.7973        | 830.4023         | 1658.8133        | 829.9103         | 16 |
| 10 | 1047.6309        | <b>524.3191</b>  | 1030.6044        | 515.8058         | 1029.6204       | 515.3138         | P    | <b>1577.7554</b> | <b>789.3814</b>  | 1560.7289        | 780.8681         | 1559.7449        | 780.3761         | 15 |
| 11 | <b>1175.6895</b> | 588.3484         | 1158.6630        | 579.8351         | 1157.6790       | 579.3431         | Q    | 1480.7027        | 740.8550         | <b>1463.6761</b> | 732.3417         | 1462.6921        | 731.8497         | 14 |
| 12 | <b>1312.7484</b> | <b>656.8779</b>  | 1295.7219        | 648.3646         | 1294.7379       | 647.8726         | H    | <b>1352.6441</b> | <b>676.8257</b>  | 1335.6175        | 668.3124         | 1334.6335        | 667.8204         | 13 |
| 13 | <b>1383.7855</b> | <b>692.3964</b>  | 1366.7590        | 683.8831         | 1365.7750       | 683.3911         | A    | <b>1215.5852</b> | 608.2962         | 1198.5586        | 599.7830         | 1197.5746        | 599.2909         | 12 |
| 14 | <b>1511.8441</b> | <b>756.4257</b>  | 1494.8176        | 747.9124         | 1493.8336       | 747.4204         | Q    | 1144.5481        | <b>572.7777</b>  | <b>1127.5215</b> | <b>564.2644</b>  | <b>1126.5375</b> | <b>563.7724</b>  | 11 |
| 15 | 1568.8656        | 784.9364         | 1551.8390        | 776.4232         | 1550.8550       | 775.9311         | G    | <b>1016.4895</b> | 508.7484         | 999.4629         | 500.2351         | 998.4789         | 499.7431         | 10 |
| 16 | 1697.9082        | 849.4577         | 1680.8816        | 840.9445         | 1679.8976       | 840.4524         | E    | 959.4680         | 480.2376         | 942.4415         | 471.7244         | 941.4575         | 471.2324         | 9  |
| 17 | 1784.9402        | <b>892.9737</b>  | <b>1767.9137</b> | 884.4605         | 1766.9296       | 883.9685         | S    | 830.4254         | <b>415.7164</b>  | 813.3989         | 407.2031         | 812.4149         | 406.7111         | 8  |
| 18 | 1855.9773        | <b>928.4923</b>  | 1838.9508        | <b>919.9790</b>  | 1837.9668       | <b>919.4870</b>  | A    | 743.3934         | 372.2003         | 726.3668         | 363.6871         | 725.3828         | 363.1951         | 7  |
| 19 | 1985.0199        | <b>993.0136</b>  | 1967.9934        | 984.5003         | 1967.0093       | 984.0083         | E    | 672.3563         | <b>336.6818</b>  | 655.3297         | 328.1685         | 654.3457         | 327.6765         | 6  |
| 20 | 2082.0727        | 1041.5400        | 2065.0461        | 1033.0267        | 2064.0621       | 1032.5347        | P    | <b>543.3137</b>  | 272.1605         | <b>526.2871</b>  | 263.6472         | <b>525.3031</b>  | 263.1552         | 5  |
| 21 | 2153.1098        | 1077.0585        | 2136.0832        | 1068.5453        | 2135.0992       | 1068.0533        | A    | 446.2609         | 223.6341         | 429.2344         | 215.1208         | 428.2504         | 214.6288         | 4  |
| 22 | 2268.1367        | <b>1134.5720</b> | 2251.1102        | <b>1126.0587</b> | 2250.1262       | <b>1125.5667</b> | D    | 375.2238         | 188.1155         | 358.1973         | 179.6023         | 357.2132         | 179.1103         | 3  |
| 23 | 2381.2208        | <b>1191.1140</b> | 2364.1943        | 1182.6008        | 2363.2102       | 1182.1088        | L    | <b>260.1969</b>  | 130.6021         | 243.1703         | 122.0888         |                  |                  | 2  |
| 24 |                  |                  |                  |                  |                 |                  | K    | 147.1128         | 74.0600          | 130.0863         | 65.5468          |                  |                  | 1  |

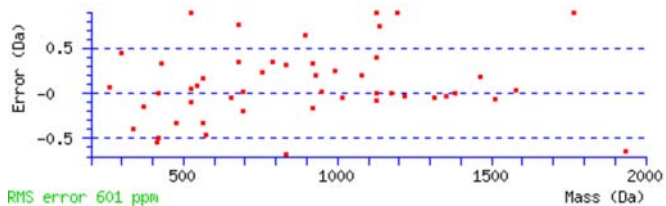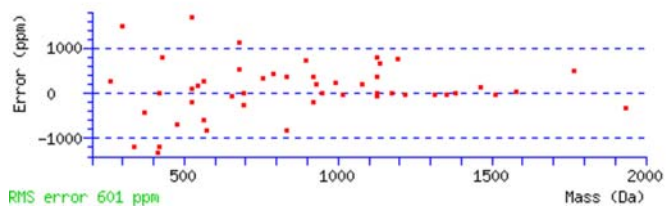

NCBI BLAST search of [VLRPQVSAVPQHAQGESAEPADLK](#)

(Parameters: blastp, nr protein database, expect=20000, no filter, PAM30)

Other BLAST [web gateways](#)

**All matches to this query**

| Score | Mr(calc): | Delta   | Sequence                                 |
|-------|-----------|---------|------------------------------------------|
| 40.9  | 2526.3190 | 0.8437  | <a href="#">VLRPQVSAVPQHAQGESAEPADLK</a> |
| 9.1   | 2527.0818 | 0.0810  | <a href="#">CNMDHEYFGLDVPQEMSLNTK</a>    |
| 7.9   | 2527.9760 | -0.8132 | <a href="#">DPCLCPVCEGCQFNCRDCGNGER</a>  |
| 5.9   | 2529.0757 | -1.9129 | <a href="#">CVSCKPGFQLLDGQCQDVDECSR</a>  |
| 5.2   | 2525.2081 | 1.9546  | <a href="#">TAKNMTSVPGVNGSPHSALDYSHR</a> |
| 4.6   | 2526.2691 | 0.8936  | <a href="#">CVYLFSFAMIFNGIADILGSFAK</a>  |
| 4.5   | 2528.0939 | -0.9312 | <a href="#">NPGVIFDDQTOHNDAADEEDEIK</a>  |
| 4.5   | 2527.1433 | 0.0194  | <a href="#">MAGSAGEWCLMESDPGVFTELIK</a>  |
| 4.5   | 2529.2542 | -2.0915 | <a href="#">AGFIAQSCLAQGLSTMLANLFSMR</a> |
| 4.2   | 2526.3289 | 0.8338  | <a href="#">TAAEVTQKLQIAAETEIQINAAR</a>  |

Mascot: <http://www.matrixscience.com/>

# MASCOT SCIENCE Mascot Search Results

## Peptide View

MS/MS Fragmentation of **VNYHTGPIVWGEPTNGQHAFYQLIHQTR**

Found in [gi|21426837|ref|NP\\_658910.1](#), glucose phosphate isomerase b [Danio rerio]

Match to Query 132237: 3378.582723 from(1127.201517,3+) index(147366)

Data file TCDD\_0530.dta

Click mouse within plot area to zoom in by factor of two about that point

Or, Plot from  to  Da

Label all possible matches  Label matches used for scoring

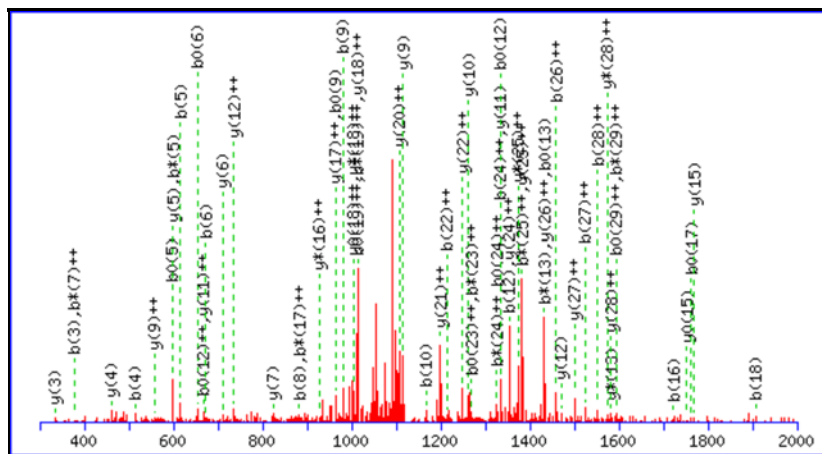

Monoisotopic mass of neutral peptide Mr(calc): 3376.6490

Ions Score: 45 Expect: 0.0031

Matches : 65/336 fragment ions using 133 most intense peaks ([help](#))

| #  | b                | b <sup>++</sup>  | b*               | b <sup>*++</sup> | b <sup>0</sup>   | b <sup>0++</sup> | Seq. | y                | y <sup>++</sup>  | y*               | y <sup>*++</sup> | y <sup>0</sup>   | y <sup>0++</sup> | #  |
|----|------------------|------------------|------------------|------------------|------------------|------------------|------|------------------|------------------|------------------|------------------|------------------|------------------|----|
| 1  | 100.0757         | 50.5415          |                  |                  |                  |                  | V    |                  |                  |                  |                  |                  |                  | 30 |
| 2  | 214.1186         | 107.5629         | 197.0921         | 99.0497          |                  |                  | N    | 3278.5879        | 1639.7976        | 3261.5613        | 1631.2843        | 3260.5773        | 1630.7923        | 29 |
| 3  | <b>377.1819</b>  | 189.0946         | 360.1554         | 180.5813         |                  |                  | Y    | 3164.5449        | <b>1582.7761</b> | 3147.5184        | <b>1574.2628</b> | 3146.5344        | 1573.7708        | 28 |
| 4  | <b>514.2409</b>  | 257.6241         | 497.2143         | 249.1108         |                  |                  | H    | 3001.4816        | <b>1501.2444</b> | 2984.4551        | 1492.7312        | 2983.4710        | 1492.2392        | 27 |
| 5  | <b>615.2885</b>  | 308.1479         | <b>598.2620</b>  | 299.6346         | <b>597.2780</b>  | 299.1426         | T    | 2864.4227        | <b>1432.7150</b> | 2847.3961        | 1424.2017        | 2846.4121        | 1423.7097        | 26 |
| 6  | <b>672.3100</b>  | 336.6586         | 655.2835         | 328.1454         | <b>654.2994</b>  | 327.6534         | G    | 2763.3750        | <b>1382.1911</b> | 2746.3485        | <b>1373.6779</b> | 2745.3644        | 1373.1859        | 25 |
| 7  | 769.3628         | 385.1850         | 752.3362         | <b>376.6717</b>  | 751.3522         | 376.1797         | P    | 2706.3535        | <b>1353.6804</b> | 2689.3270        | 1345.1671        | 2688.3430        | 1344.6751        | 24 |
| 8  | <b>882.4468</b>  | 441.7271         | 865.4203         | 433.2138         | 864.4363         | 432.7218         | I    | 2609.3008        | 1305.1540        | 2592.2742        | 1296.6408        | 2591.2902        | 1296.1487        | 23 |
| 9  | <b>981.5152</b>  | 491.2613         | 964.4887         | 482.7480         | <b>963.5047</b>  | 482.2560         | V    | 2496.2167        | <b>1248.6120</b> | 2479.1902        | 1240.0987        | 2478.2062        | 1239.6067        | 22 |
| 10 | <b>1167.5946</b> | 584.3009         | 1150.5680        | 575.7876         | 1149.5840        | 575.2956         | W    | 2397.1483        | <b>1199.0778</b> | 2380.1218        | 1190.5645        | 2379.1377        | 1190.0725        | 21 |
| 11 | 1224.6160        | 612.8116         | 1207.5895        | 604.2984         | 1206.6055        | 603.8064         | G    | 2211.0690        | <b>1106.0381</b> | 2194.0424        | 1097.5249        | 2193.0584        | 1097.0329        | 20 |
| 12 | <b>1353.6586</b> | 677.3329         | 1336.6321        | 668.8197         | <b>1335.6480</b> | <b>668.3277</b>  | E    | 2154.0475        | 1077.5274        | 2137.0210        | 1069.0141        | 2136.0370        | 1068.5221        | 19 |
| 13 | 1450.7114        | 725.8593         | <b>1433.6848</b> | 717.3461         | <b>1432.7008</b> | 716.8540         | P    | 2025.0049        | <b>1013.0061</b> | 2007.9784        | <b>1004.4928</b> | 2006.9944        | <b>1004.0008</b> | 18 |
| 14 | 1507.7328        | 754.3701         | 1490.7063        | 745.8568         | 1489.7223        | 745.3648         | G    | 1927.9522        | <b>964.4797</b>  | 1910.9256        | 955.9664         | 1909.9416        | 955.4744         | 17 |
| 15 | 1608.7805        | 804.8939         | 1591.7540        | 796.3806         | 1590.7700        | 795.8886         | T    | 1870.9307        | 935.9690         | 1853.9042        | <b>927.4557</b>  | 1852.9201        | 926.9637         | 16 |
| 16 | <b>1722.8234</b> | 861.9154         | 1705.7969        | 853.4021         | 1704.8129        | 852.9101         | N    | <b>1769.8830</b> | 885.4452         | 1752.8565        | 876.9319         | <b>1751.8725</b> | 876.4399         | 15 |
| 17 | 1779.8449        | 890.4261         | 1762.8184        | <b>881.9128</b>  | <b>1761.8343</b> | 881.4208         | G    | 1655.8401        | 828.4237         | 1638.8136        | 819.9104         | 1637.8295        | 819.4184         | 14 |
| 18 | <b>1907.9035</b> | 954.4554         | 1890.8769        | 945.9421         | 1889.8929        | 945.4501         | Q    | 1598.8186        | 799.9130         | <b>1581.7921</b> | 791.3997         | 1580.8081        | 790.9077         | 13 |
| 19 | 2044.9624        | 1022.9848        | 2027.9359        | <b>1014.4716</b> | 2026.9518        | <b>1013.9796</b> | H    | <b>1470.7601</b> | <b>735.8837</b>  | 1453.7335        | 727.3704         | 1452.7495        | 726.8784         | 12 |
| 20 | 2115.9995        | 1058.5034        | 2098.9730        | 1049.9901        | 2097.9889        | 1049.4981        | A    | <b>1333.7011</b> | <b>667.3542</b>  | 1316.6746        | 658.8409         | 1315.6906        | 658.3489         | 11 |
| 21 | 2263.0679        | 1132.0376        | 2246.0414        | 1123.5243        | 2245.0574        | 1123.0323        | F    | <b>1262.6640</b> | 631.8357         | 1245.6375        | 623.3224         | 1244.6535        | 622.8304         | 10 |
| 22 | 2426.1313        | <b>1213.5693</b> | 2409.1047        | 1205.0560        | 2408.1207        | 1204.5640        | Y    | <b>1115.5956</b> | <b>558.3014</b>  | 1098.5691        | 549.7882         | 1097.5851        | 549.2962         | 9  |
| 23 | 2554.1898        | 1277.5986        | 2537.1633        | <b>1269.0853</b> | 2536.1793        | <b>1268.5933</b> | Q    | 952.5323         | 476.7698         | 935.5057         | 468.2565         | 934.5217         | 467.7645         | 8  |
| 24 | 2667.2739        | <b>1334.1406</b> | 2650.2474        | <b>1325.6273</b> | 2649.2633        | <b>1325.1353</b> | L    | <b>824.4737</b>  | 412.7405         | 807.4472         | 404.2272         | 806.4631         | 403.7352         | 7  |

|    |           |           |           |           |           |           |   |          |          |          |          |          |          |   |
|----|-----------|-----------|-----------|-----------|-----------|-----------|---|----------|----------|----------|----------|----------|----------|---|
| 25 | 2780.3580 | 1390.6826 | 2763.3314 | 1382.1693 | 2762.3474 | 1381.6773 | I | 711.3896 | 356.1985 | 694.3631 | 347.6852 | 693.3791 | 347.1932 | 6 |
| 26 | 2917.4169 | 1459.2121 | 2900.3903 | 1450.6988 | 2899.4063 | 1450.2068 | H | 598.3056 | 299.6564 | 581.2790 | 291.1432 | 580.2950 | 290.6511 | 5 |
| 27 | 3045.4755 | 1523.2414 | 3028.4489 | 1514.7281 | 3027.4649 | 1514.2361 | Q | 461.2467 | 231.1270 | 444.2201 | 222.6137 | 443.2361 | 222.1217 | 4 |
| 28 | 3102.4969 | 1551.7521 | 3085.4704 | 1543.2388 | 3084.4864 | 1542.7468 | G | 333.1881 | 167.0977 | 316.1615 | 158.5844 | 315.1775 | 158.0924 | 3 |
| 29 | 3203.5446 | 1602.2759 | 3186.5180 | 1593.7627 | 3185.5340 | 1593.2707 | T | 276.1666 | 138.5870 | 259.1401 | 130.0737 | 258.1561 | 129.5817 | 2 |
| 30 |           |           |           |           |           |           | R | 175.1190 | 88.0631  | 158.0924 | 79.5498  |          |          | 1 |

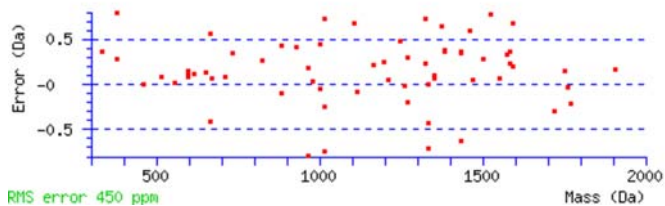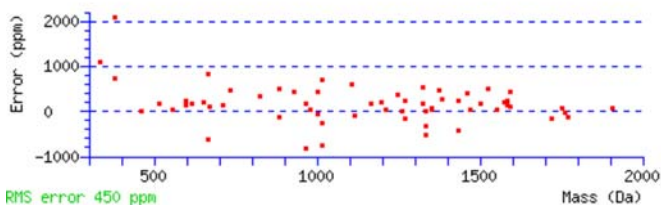

NCBI BLAST search of [VNYHTGPIVWGEPGTNGQHAFYQLIHQGTR](#)

(Parameters: blastp, nr protein database, expect=20000, no filter, PAM30)

Other BLAST [web gateways](#)

#### All matches to this query

| Score | Mr(calc): | Delta   | Sequence                                           |
|-------|-----------|---------|----------------------------------------------------|
| 45.0  | 3376.6490 | 1.9337  | <a href="#">VNYHTGPIVWGEPGTNGQHAFYQLIHQGTR</a>     |
| 2.1   | 3376.3868 | 2.1959  | <a href="#">APAVDCGKGHLFCWECLGDAHEPCDCETWK</a>     |
| 1.2   | 3380.4260 | -1.8433 | <a href="#">HNTYCEEGITHASRCVSIWCCPTWPST</a>        |
| 0.7   | 3378.6264 | -0.0437 | <a href="#">MAVGALLAAADVDAALAAACQAADSFDYKSFFAK</a> |
| 0.7   | 3380.8582 | -2.2755 | <a href="#">EADTVEEVLLLEELQVFKVVPITEILISTK</a>     |
| 0.5   | 3378.7260 | -0.1433 | <a href="#">HTSTIGPVIHLSVFMGGMCFVCQRVVCR</a>       |
| 0.1   | 3376.3868 | 2.1959  | <a href="#">APAVDCGKGHLFCWECLGDAHEPCDCETWK</a>     |
| 0.0   | 3380.4418 | -1.8591 | <a href="#">GGQDCGVIEVSGTWDDGNCGDIRPIICEIDM</a>    |

Mascot: <http://www.matrixscience.com/>

# MASCOT SCIENCE Mascot Search Results

## Peptide View

MS/MS Fragmentation of **VQISAAHTDEDIDR**

Found in [gi189517050|ref|XP\\_701260.3](#), PREDICTED: glycine C-acetyltransferase [Danio rerio]

Match to Query 25148: 1569.522724 from(785.768638,2+) index(30738)

Data file TCDD\_0530.dta

Click mouse within plot area to zoom in by factor of two about that point

Or, Plot from  to  Da

Label all possible matches  Label matches used for scoring

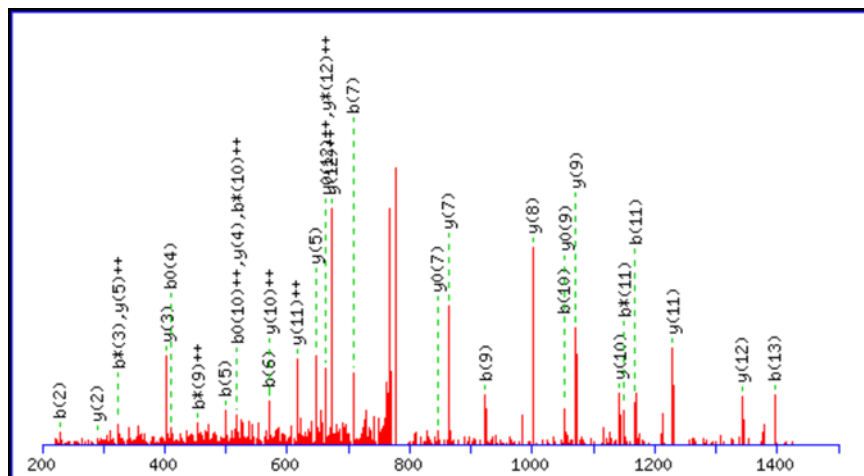

Monoisotopic mass of neutral peptide Mr(calc): 1568.7431

Ions Score: 68 Expect: 4.6e-005

Matches : 32/146 fragment ions using 49 most intense peaks ([help](#))

| #  | b                | b <sup>++</sup> | b <sup>*</sup>   | b <sup>+++</sup> | b <sup>0</sup>  | b <sup>0++</sup> | Seq. | y                | y <sup>++</sup> | y <sup>*</sup> | y <sup>+++</sup> | y <sup>0</sup>   | y <sup>0++</sup> | #  |
|----|------------------|-----------------|------------------|------------------|-----------------|------------------|------|------------------|-----------------|----------------|------------------|------------------|------------------|----|
| 1  | 100.0757         | 50.5415         |                  |                  |                 |                  | V    |                  |                 |                |                  |                  |                  | 14 |
| 2  | <b>228.1343</b>  | 114.5708        | 211.1077         | 106.0575         |                 |                  | Q    | 1470.6819        | 735.8446        | 1453.6554      | 727.3313         | 1452.6714        | 726.8393         | 13 |
| 3  | 341.2183         | 171.1128        | <b>324.1918</b>  | 162.5995         |                 |                  | I    | <b>1342.6233</b> | <b>671.8153</b> | 1325.5968      | <b>663.3020</b>  | 1324.6128        | <b>662.8100</b>  | 12 |
| 4  | 428.2504         | 214.6288        | 411.2238         | 206.1155         | <b>410.2398</b> | 205.6235         | S    | <b>1229.5393</b> | <b>615.2733</b> | 1212.5127      | 606.7600         | 1211.5287        | 606.2680         | 11 |
| 5  | <b>499.2875</b>  | 250.1474        | 482.2609         | 241.6341         | 481.2769        | 241.1421         | A    | <b>1142.5073</b> | <b>571.7573</b> | 1125.4807      | 563.2440         | 1124.4967        | 562.7520         | 10 |
| 6  | <b>570.3246</b>  | 285.6659        | 553.2980         | 277.1527         | 552.3140        | 276.6606         | A    | <b>1071.4701</b> | 536.2387        | 1054.4436      | 527.7254         | <b>1053.4596</b> | 527.2334         | 9  |
| 7  | <b>707.3835</b>  | 354.1954        | 690.3570         | 345.6821         | 689.3729        | 345.1901         | H    | <b>1000.4330</b> | 500.7202        | 983.4065       | 492.2069         | 982.4225         | 491.7149         | 8  |
| 8  | 808.4312         | 404.7192        | 791.4046         | 396.2060         | 790.4206        | 395.7139         | T    | <b>863.3741</b>  | 432.1907        | 846.3476       | 423.6774         | <b>845.3636</b>  | 423.1854         | 7  |
| 9  | <b>923.4581</b>  | 462.2327        | 906.4316         | <b>453.7194</b>  | 905.4476        | 453.2274         | D    | 762.3264         | 381.6669        | 745.2999       | 373.1536         | 744.3159         | 372.6616         | 6  |
| 10 | <b>1052.5007</b> | 526.7540        | 1035.4742        | <b>518.2407</b>  | 1034.4901       | <b>517.7487</b>  | E    | <b>647.2995</b>  | <b>324.1534</b> | 630.2729       | 315.6401         | 629.2889         | 315.1481         | 5  |
| 11 | <b>1167.5277</b> | 584.2675        | <b>1150.5011</b> | 575.7542         | 1149.5171       | 575.2622         | D    | <b>518.2569</b>  | 259.6321        | 501.2304       | 251.1188         | 500.2463         | 250.6268         | 4  |
| 12 | 1280.6117        | 640.8095        | 1263.5852        | 632.2962         | 1262.6012       | 631.8042         | I    | <b>403.2300</b>  | 202.1186        | 386.2034       | 193.6053         | 385.2194         | 193.1133         | 3  |
| 13 | <b>1395.6387</b> | 698.3230        | 1378.6121        | 689.8097         | 1377.6281       | 689.3177         | D    | <b>290.1459</b>  | 145.5766        | 273.1193       | 137.0633         | 272.1353         | 136.5713         | 2  |
| 14 |                  |                 |                  |                  |                 |                  | R    | 175.1190         | 88.0631         | 158.0924       | 79.5498          |                  |                  | 1  |

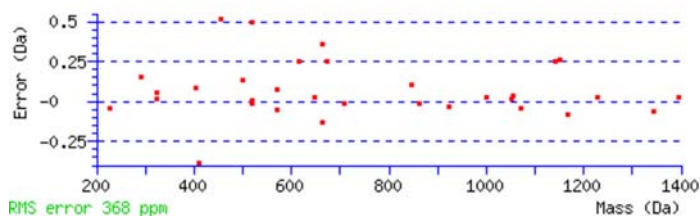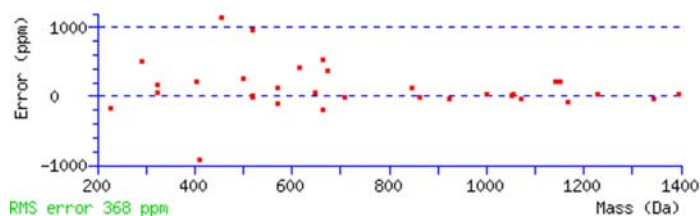

NCBI **BLAST** search of [VQISAAHTDEDIDR](#)  
(Parameters: blastp, nr protein database, expect=20000, no filter, PAM30)  
Other BLAST [web gateways](#)

**All matches to this query**

| Score | Mr(calc): | Delta   | Sequence                        |
|-------|-----------|---------|---------------------------------|
| 67.8  | 1568.7431 | 0.7797  | <a href="#">VQISAAHTDEDIDR</a>  |
| 12.7  | 1570.8315 | -1.3088 | <a href="#">QVLTLGVTENNDR</a>   |
| 10.4  | 1569.8614 | -0.3387 | <a href="#">GDVVKAVVLDVDVDK</a> |
| 9.9   | 1568.6591 | 0.8637  | <a href="#">GQTQEYTDDEDVER</a>  |
| 8.9   | 1568.7731 | 0.7496  | <a href="#">NLLTQCMFFPVEK</a>   |
| 8.2   | 1570.8077 | -1.2849 | <a href="#">AHGHAVVQDRAASPR</a> |
| 7.8   | 1569.8614 | -0.3386 | <a href="#">LNLDIGLLSLDQEK</a>  |
| 7.8   | 1568.7729 | 0.7498  | <a href="#">LINGPDPCSGRVER</a>  |
| 7.5   | 1569.6956 | -0.1729 | <a href="#">YCVFSHEELVCK</a>    |
| 7.1   | 1568.7332 | 0.7896  | <a href="#">DAHPPPADLSQEHR</a>  |

Mascot: <http://www.matrixscience.com/>



**MATRIX SCIENCE** Mascot Search Results

**Peptide View**

MS/MS Fragmentation of **VSEVPQQIHHPVQQQQPTQQPQPK**  
 Found in [gi|57525959|ref|NP\\_001003533.1|](#), BCL2-associated athanogene 3 [Danio rerio]

Match to Query 109896: 3043.752723 from(1015.591517,3+) index(43429)  
 Data file TCDD\_0530.dta

Click mouse within plot area to zoom in by factor of two about that point

Or, Plot from  to  Da

Label all possible matches  Label matches used for scoring

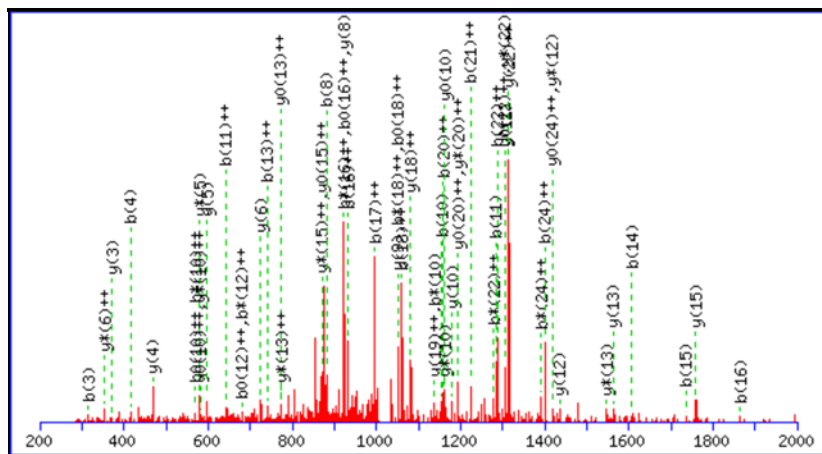

Monoisotopic mass of neutral peptide Mr(calc): 3041.5432  
 Ions Score: 41 Expect: 0.0095  
 Matches : 59/276 fragment ions using 100 most intense peaks ([help](#))

| #  | b                | b <sup>++</sup>  | b*               | b <sup>*++</sup> | b <sup>0</sup> | b <sup>0++</sup> | Seq. | y                | y <sup>++</sup>  | y*               | y <sup>*++</sup> | y <sup>0</sup>   | y <sup>0++</sup> | #  |
|----|------------------|------------------|------------------|------------------|----------------|------------------|------|------------------|------------------|------------------|------------------|------------------|------------------|----|
| 1  | 100.0757         | 50.5415          |                  |                  |                |                  | V    |                  |                  |                  |                  |                  |                  | 26 |
| 2  | 187.1077         | 94.0575          |                  |                  | 169.0972       | 85.0522          | S    | 2943.4820        | 1472.2446        | 2926.4554        | 1463.7314        | 2925.4714        | 1463.2394        | 25 |
| 3  | <b>316.1503</b>  | 158.5788         |                  |                  | 298.1397       | 149.5735         | E    | 2856.4500        | 1428.7286        | 2839.4234        | 1420.2153        | 2838.4394        | <b>1419.7233</b> | 24 |
| 4  | <b>415.2187</b>  | 208.1130         |                  |                  | 397.2082       | 199.1077         | V    | 2727.4074        | 1364.2073        | 2710.3808        | 1355.6941        | 2709.3968        | 1355.2020        | 23 |
| 5  | 512.2715         | 256.6394         |                  |                  | 494.2609       | 247.6341         | P    | 2628.3390        | <b>1314.6731</b> | 2611.3124        | <b>1306.1598</b> | 2610.3284        | <b>1305.6678</b> | 22 |
| 6  | 640.3301         | 320.6687         | 623.3035         | 312.1554         | 622.3195       | 311.6634         | Q    | 2531.2862        | 1266.1467        | 2514.2597        | 1257.6335        | 2513.2756        | 1257.1415        | 21 |
| 7  | 768.3886         | 384.6980         | 751.3621         | 376.1847         | 750.3781       | 375.6927         | Q    | 2403.2276        | 1202.1174        | 2386.2011        | <b>1193.6042</b> | 2385.2171        | <b>1193.1122</b> | 20 |
| 8  | <b>881.4727</b>  | 441.2400         | 864.4462         | 432.7267         | 863.4621       | 432.2347         | I    | 2275.1690        | <b>1138.0882</b> | 2258.1425        | 1129.5749        | 2257.1585        | 1129.0829        | 19 |
| 9  | 1018.5316        | 509.7694         | 1001.5051        | 501.2562         | 1000.5211      | 500.7642         | H    | 2162.0850        | <b>1081.5461</b> | 2145.0584        | 1073.0329        | 2144.0744        | 1072.5408        | 18 |
| 10 | <b>1155.5905</b> | 578.2989         | <b>1138.5640</b> | <b>569.7856</b>  | 1137.5800      | <b>569.2936</b>  | H    | 2025.0261        | 1013.0167        | 2007.9995        | 1004.5034        | 2007.0155        | 1004.0114        | 17 |
| 11 | <b>1283.6491</b> | <b>642.3282</b>  | 1266.6226        | 633.8149         | 1265.6385      | 633.3229         | Q    | 1887.9672        | 944.4872         | 1870.9406        | 935.9739         | 1869.9566        | 935.4819         | 16 |
| 12 | 1380.7019        | 690.8546         | 1363.6753        | <b>682.3413</b>  | 1362.6913      | <b>681.8493</b>  | P    | <b>1759.9086</b> | 880.4579         | 1742.8820        | <b>871.9447</b>  | 1741.8980        | <b>871.4526</b>  | 15 |
| 13 | 1479.7703        | <b>740.3888</b>  | 1462.7437        | 731.8755         | 1461.7597      | 731.3835         | V    | 1662.8558        | 831.9315         | 1645.8293        | 823.4183         | 1644.8452        | 822.9263         | 14 |
| 14 | <b>1607.8289</b> | 804.4181         | 1590.8023        | 795.9048         | 1589.8183      | 795.4128         | Q    | <b>1563.7874</b> | 782.3973         | <b>1546.7609</b> | <b>773.8841</b>  | 1545.7768        | <b>773.3921</b>  | 13 |
| 15 | <b>1735.8874</b> | 868.4474         | 1718.8609        | 859.9341         | 1717.8769      | 859.4421         | Q    | <b>1435.7288</b> | 718.3680         | <b>1418.7023</b> | 709.8548         | 1417.7183        | 709.3628         | 12 |
| 16 | <b>1863.9460</b> | <b>932.4766</b>  | 1846.9195        | <b>923.9634</b>  | 1845.9355      | <b>923.4714</b>  | Q    | <b>1307.6702</b> | 654.3388         | 1290.6437        | 645.8255         | 1289.6597        | 645.3335         | 11 |
| 17 | 1992.0046        | <b>996.5059</b>  | 1974.9781        | 987.9927         | 1973.9940      | 987.5007         | Q    | <b>1179.6117</b> | 590.3095         | <b>1162.5851</b> | <b>581.7962</b>  | <b>1161.6011</b> | <b>581.3042</b>  | 10 |
| 18 | 2120.0632        | <b>1060.5352</b> | 2103.0366        | <b>1052.0220</b> | 2102.0526      | <b>1051.5299</b> | Q    | <b>1051.5531</b> | 526.2802         | 1034.5265        | 517.7669         | 1033.5425        | 517.2749         | 9  |
| 19 | 2217.1159        | 1109.0616        | 2200.0894        | 1100.5483        | 2199.1054      | 1100.0563        | P    | <b>923.4945</b>  | 462.2509         | 906.4680         | 453.7376         | 905.4839         | 453.2456         | 8  |
| 20 | 2318.1636        | <b>1159.5854</b> | 2301.1371        | 1151.0722        | 2300.1531      | 1150.5802        | T    | 826.4417         | 413.7245         | 809.4152         | 405.2112         | 808.4312         | 404.7192         | 7  |
| 21 | 2446.2222        | <b>1223.6147</b> | 2429.1957        | 1215.1015        | 2428.2116      | 1214.6095        | Q    | <b>725.3941</b>  | 363.2007         | 708.3675         | <b>354.6874</b>  |                  |                  | 6  |
| 22 | 2574.2808        | <b>1287.6440</b> | 2557.2542        | <b>1279.1308</b> | 2556.2702      | 1278.6387        | Q    | <b>597.3355</b>  | 299.1714         | <b>580.3089</b>  | 290.6581         |                  |                  | 5  |
| 23 | 2671.3335        | 1336.1704        | 2654.3070        | 1327.6571        | 2653.3230      | 1327.1651        | P    | <b>469.2769</b>  | 235.1421         | 452.2504         | 226.6288         |                  |                  | 4  |
| 24 | 2799.3921        | <b>1400.1997</b> | 2782.3656        | <b>1391.6864</b> | 2781.3816      | 1391.1944        | Q    | <b>372.2241</b>  | 186.6157         | 355.1976         | 178.1024         |                  |                  | 3  |



|    |           |           |           |           |           |           |   |          |          |          |          |  |  |   |
|----|-----------|-----------|-----------|-----------|-----------|-----------|---|----------|----------|----------|----------|--|--|---|
| 25 | 2896.4449 | 1448.7261 | 2879.4183 | 1440.2128 | 2878.4343 | 1439.7208 | P | 244.1656 | 122.5864 | 227.1390 | 114.0731 |  |  | 2 |
| 26 |           |           |           |           |           |           | K | 147.1128 | 74.0600  | 130.0863 | 65.5468  |  |  | 1 |

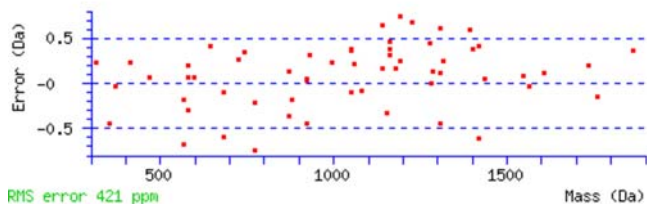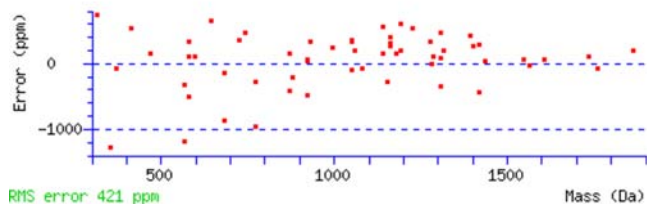

NCBI BLAST search of [VSEVPQQIHHQPVQQQQOPTQQPQPK](#)  
 (Parameters: blastp, nr protein database, expect=20000, no filter, PAM30)

Other BLAST [web gateways](#)

**All matches to this query**

| Score | Mr(calc): | Delta   | Sequence                                      |
|-------|-----------|---------|-----------------------------------------------|
| 40.9  | 3041.5432 | 2.2096  | <a href="#">VSEVPQQIHHQPVQQQQOPTQQPQPK</a>    |
| 2.9   | 3045.5892 | -1.8364 | <a href="#">LFRHMEELLSAAGLAPCSLQQLQHSIK</a>   |
| 1.9   | 3045.5350 | -1.7823 | <a href="#">IDSYSRICFPLAYVLFNLIYWSIYS</a>     |
| 1.0   | 3043.4777 | 0.2751  | <a href="#">AKSENTMTTIMDPTVMPAAASVPPAQTQR</a> |

**Mascot:** <http://www.matrixscience.com/>

**MASCOT** SCIENCE Mascot Search Results

**Peptide View**

MS/MS Fragmentation of **VSPITINLINVLSENGR**

Found in [gi|51467909|ref|NP\\_001003843.1](#), ATP synthase, H+ transporting, mitochondrial F1 complex, O subunit [Danio rerio]

Match to Query 37246: 1839.302724 from(920.658638,2+) index(1901)

Data file TCDD\_0530.dta

Click mouse within plot area to zoom in by factor of two about that point

Or, Plot from  to  Da

Label all possible matches  Label matches used for scoring

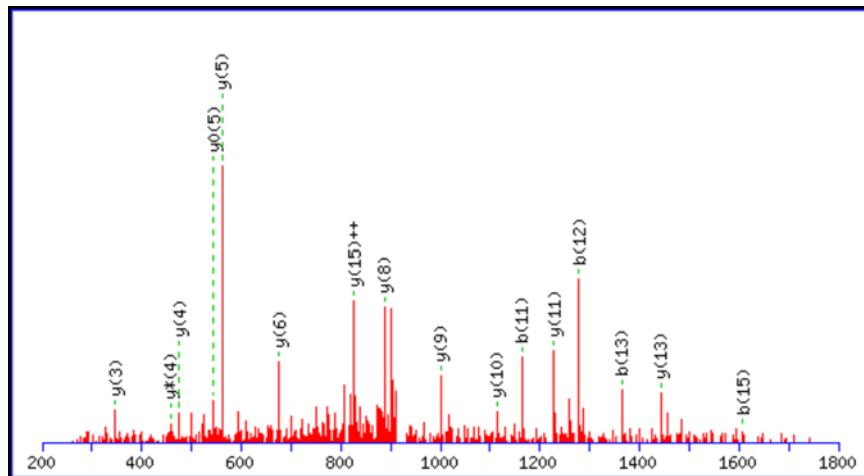

Monoisotopic mass of neutral peptide Mr(calc): 1838.0261

Ions Score: 51 Expect: 0.0018

Matches : 16/172 fragment ions using 30 most intense peaks ([help](#))

| #  | b         | b <sup>++</sup> | b <sup>*</sup> | b <sup>*++</sup> | b <sup>0</sup> | b <sup>0++</sup> | Seq. | y         | y <sup>++</sup> | y <sup>*</sup> | y <sup>*++</sup> | y <sup>0</sup> | y <sup>0++</sup> | #  |
|----|-----------|-----------------|----------------|------------------|----------------|------------------|------|-----------|-----------------|----------------|------------------|----------------|------------------|----|
| 1  | 100.0757  | 50.5415         |                |                  |                |                  | V    |           |                 |                |                  |                |                  | 17 |
| 2  | 187.1077  | 94.0575         |                |                  | 169.0972       | 85.0522          | S    | 1739.9650 | 870.4861        | 1722.9385      | 861.9729         | 1721.9545      | 861.4809         | 16 |
| 3  | 284.1605  | 142.5839        |                |                  | 266.1499       | 133.5786         | P    | 1652.9330 | 826.9701        | 1635.9064      | 818.4569         | 1634.9224      | 817.9649         | 15 |
| 4  | 397.2445  | 199.1259        |                |                  | 379.2340       | 190.1206         | I    | 1555.8802 | 778.4438        | 1538.8537      | 769.9305         | 1537.8697      | 769.4385         | 14 |
| 5  | 498.2922  | 249.6498        |                |                  | 480.2817       | 240.6445         | T    | 1442.7962 | 721.9017        | 1425.7696      | 713.3884         | 1424.7856      | 712.8964         | 13 |
| 6  | 611.3763  | 306.1918        |                |                  | 593.3657       | 297.1865         | I    | 1341.7485 | 671.3779        | 1324.7219      | 662.8646         | 1323.7379      | 662.3726         | 12 |
| 7  | 725.4192  | 363.2132        | 708.3927       | 354.7000         | 707.4087       | 354.2080         | N    | 1228.6644 | 614.8358        | 1211.6379      | 606.3226         | 1210.6539      | 605.8306         | 11 |
| 8  | 838.5033  | 419.7553        | 821.4767       | 411.2420         | 820.4927       | 410.7500         | L    | 1114.6215 | 557.8144        | 1097.5949      | 549.3011         | 1096.6109      | 548.8091         | 10 |
| 9  | 951.5873  | 476.2973        | 934.5608       | 467.7840         | 933.5768       | 467.2920         | I    | 1001.5374 | 501.2724        | 984.5109       | 492.7591         | 983.5269       | 492.2671         | 9  |
| 10 | 1065.6303 | 533.3188        | 1048.6037      | 524.8055         | 1047.6197      | 524.3135         | N    | 888.4534  | 444.7303        | 871.4268       | 436.2170         | 870.4428       | 435.7250         | 8  |
| 11 | 1164.6987 | 582.8530        | 1147.6721      | 574.3397         | 1146.6881      | 573.8477         | V    | 774.4104  | 387.7089        | 757.3839       | 379.1956         | 756.3999       | 378.7036         | 7  |
| 12 | 1277.7827 | 639.3950        | 1260.7562      | 630.8817         | 1259.7722      | 630.3897         | L    | 675.3420  | 338.1747        | 658.3155       | 329.6614         | 657.3315       | 329.1694         | 6  |
| 13 | 1364.8148 | 682.9110        | 1347.7882      | 674.3978         | 1346.8042      | 673.9057         | S    | 562.2580  | 281.6326        | 545.2314       | 273.1193         | 544.2474       | 272.6273         | 5  |
| 14 | 1493.8574 | 747.4323        | 1476.8308      | 738.9190         | 1475.8468      | 738.4270         | E    | 475.2259  | 238.1166        | 458.1994       | 229.6033         | 457.2154       | 229.1113         | 4  |
| 15 | 1607.9003 | 804.4538        | 1590.8737      | 795.9405         | 1589.8897      | 795.4485         | N    | 346.1833  | 173.5953        | 329.1568       | 165.0820         |                |                  | 3  |
| 16 | 1664.9218 | 832.9645        | 1647.8952      | 824.4512         | 1646.9112      | 823.9592         | G    | 232.1404  | 116.5738        | 215.1139       | 108.0606         |                |                  | 2  |
| 17 |           |                 |                |                  |                |                  | R    | 175.1190  | 88.0631         | 158.0924       | 79.5498          |                |                  | 1  |

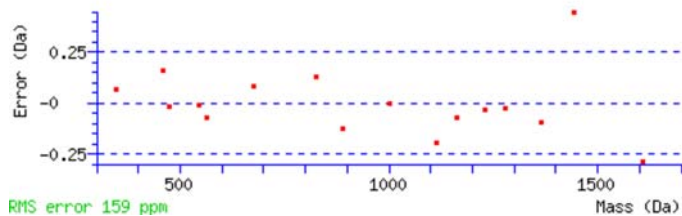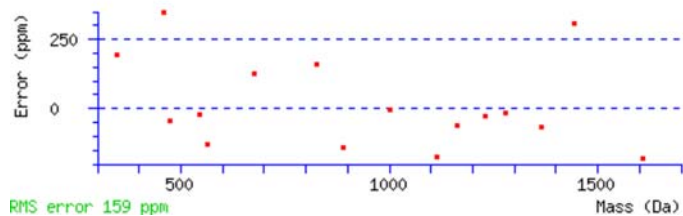

NCBI BLAST search of [VSPITINLINVLENGR](#)

(Parameters: blastp, nr protein database, expect=20000, no filter, PAM30)

Other BLAST [web gateways](#)

**All matches to this query**

| Score | Mr(calc): | Delta  | Sequence                         |
|-------|-----------|--------|----------------------------------|
| 51.0  | 1838.0261 | 1.2766 | <a href="#">VSPITINLINVLENGR</a> |
| 17.7  | 1837.8958 | 1.4069 | <a href="#">ENGFNIYVSNNIALDR</a> |

Mascot: <http://www.matrixscience.com/>

# MASCOT SCIENCE Mascot Search Results

## Peptide View

MS/MS Fragmentation of **WDSQIEDGSFPGK**

Found in [gi41055614|refNP\\_956800.1](#), hypothetical protein LOC393478 [Danio rerio]

Match to Query 22052: 1465.282724 from(733.648638,2+) index(21486)

Data file TCDD\_0530.dta

Click mouse within plot area to zoom in by factor of two about that point

Or, Plot from  to  Da

Label all possible matches  Label matches used for scoring

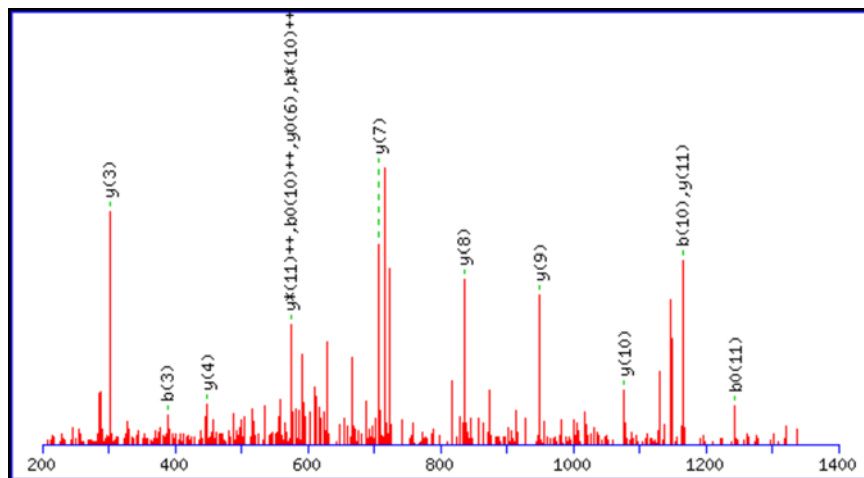

Monoisotopic mass of neutral peptide Mr(calc): 1464.6521

Ions Score: 62 Expect: 0.00018

Matches : 15/128 fragment ions using 12 most intense peaks ([help](#))

| #  | b                | b <sup>++</sup> | b <sup>*</sup> | b <sup>*++</sup> | b <sup>0</sup>   | b <sup>0++</sup> | Seq. | y                | y <sup>++</sup> | y <sup>*</sup> | y <sup>*++</sup> | y <sup>0</sup>  | y <sup>0++</sup> | #  |
|----|------------------|-----------------|----------------|------------------|------------------|------------------|------|------------------|-----------------|----------------|------------------|-----------------|------------------|----|
| 1  | 187.0866         | 94.0469         |                |                  |                  |                  | W    |                  |                 |                |                  |                 |                  | 13 |
| 2  | 302.1135         | 151.5604        |                |                  | 284.1030         | 142.5551         | D    | 1279.5801        | 640.2937        | 1262.5535      | 631.7804         | 1261.5695       | 631.2884         | 12 |
| 3  | <b>389.1456</b>  | 195.0764        |                |                  | 371.1350         | 186.0711         | S    | <b>1164.5531</b> | 582.7802        | 1147.5266      | <b>574.2669</b>  | 1146.5426       | <b>573.7749</b>  | 11 |
| 4  | 517.2041         | 259.1057        | 500.1776       | 250.5924         | 499.1936         | 250.1004         | Q    | <b>1077.5211</b> | 539.2642        | 1060.4946      | 530.7509         | 1059.5106       | 530.2589         | 10 |
| 5  | 630.2882         | 315.6477        | 613.2617       | 307.1345         | 612.2776         | 306.6425         | I    | <b>949.4625</b>  | 475.2349        | 932.4360       | 466.7216         | 931.4520        | 466.2296         | 9  |
| 6  | 759.3308         | 380.1690        | 742.3042       | 371.6558         | 741.3202         | 371.1638         | E    | <b>836.3785</b>  | 418.6929        | 819.3519       | 410.1796         | 818.3679        | 409.6876         | 8  |
| 7  | 874.3577         | 437.6825        | 857.3312       | 429.1692         | 856.3472         | 428.6772         | D    | <b>707.3359</b>  | 354.1716        | 690.3093       | 345.6583         | 689.3253        | 345.1663         | 7  |
| 8  | 931.3792         | 466.1932        | 914.3527       | 457.6800         | 913.3686         | 457.1880         | G    | 592.3089         | 296.6581        | 575.2824       | 288.1448         | <b>574.2984</b> | 287.6528         | 6  |
| 9  | 1018.4112        | 509.7093        | 1001.3847      | 501.1960         | 1000.4007        | 500.7040         | S    | 535.2875         | 268.1474        | 518.2609       | 259.6341         | 517.2769        | 259.1421         | 5  |
| 10 | <b>1165.4796</b> | 583.2435        | 1148.4531      | <b>574.7302</b>  | 1147.4691        | <b>574.2382</b>  | F    | <b>448.2554</b>  | 224.6314        | 431.2289       | 216.1181         |                 |                  | 4  |
| 11 | 1262.5324        | 631.7698        | 1245.5059      | 623.2566         | <b>1244.5218</b> | 622.7646         | P    | <b>301.1870</b>  | 151.0972        | 284.1605       | 142.5839         |                 |                  | 3  |
| 12 | 1319.5539        | 660.2806        | 1302.5273      | 651.7673         | 1301.5433        | 651.2753         | G    | 204.1343         | 102.5708        | 187.1077       | 94.0575          |                 |                  | 2  |
| 13 |                  |                 |                |                  |                  |                  | K    | 147.1128         | 74.0600         | 130.0863       | 65.5468          |                 |                  | 1  |

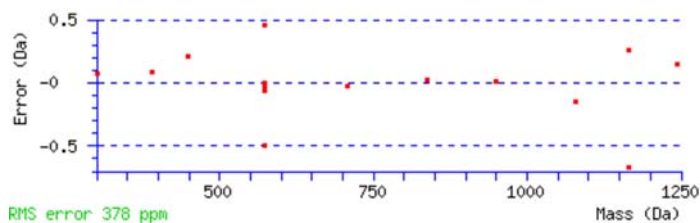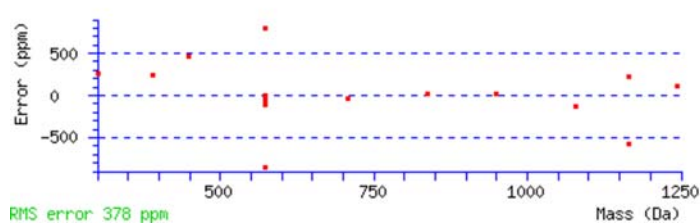

NCBI BLAST search of [WDSQIEDGSFPGK](#)

(Parameters: blastp, nr protein database, expect=20000, no filter, PAM30)  
Other BLAST [web gateways](#)

**All matches to this query**

| Score | Mr(calc): | Delta   | Sequence                        |
|-------|-----------|---------|---------------------------------|
| 61.8  | 1464.6521 | 0.6306  | <a href="#">WDSQIEDGSFPGK</a>   |
| 12.5  | 1465.6330 | -0.3503 | <a href="#">CVCNPGFELGADGK</a>  |
| 12.0  | 1464.7096 | 0.5731  | <a href="#">ALDSFLTNSESPGK</a>  |
| 11.9  | 1462.7892 | 2.4935  | <a href="#">HQQLEAEIQVLR</a>    |
| 10.9  | 1464.7316 | 0.5511  | <a href="#">AMVSVAVGTEATVCK</a> |
| 10.9  | 1466.7188 | -1.4361 | <a href="#">GVFSQINGCISTGK</a>  |
| 9.7   | 1464.7283 | 0.5545  | <a href="#">ITDFGCNTLSPGK</a>   |
| 9.1   | 1463.7005 | 1.5823  | <a href="#">ATQQSLSDQFPSR</a>   |
| 8.4   | 1464.6490 | 0.6338  | <a href="#">WLSENSTCPICR</a>    |
| 7.4   | 1464.8452 | 0.4375  | <a href="#">RYVAAYLLAALGGK</a>  |

**Mascot:** <http://www.matrixscience.com/>

# MASCOT SCIENCE Mascot Search Results

## Peptide View

MS/MS Fragmentation of **WKPSTLAGVSEQFVDK**

Found in [gi|62122813|ref|NP\\_001014338.1](#), 3-hydroxyisobutyryl-Coenzyme A hydrolase [Danio rerio]

Match to Query 35084: 1792.912724 from(897.463638,2+) index(45500)

Data file TCDD\_0530.dta

Click mouse within plot area to zoom in by factor of two about that point

Or, Plot from  to  Da

Label all possible matches  Label matches used for scoring

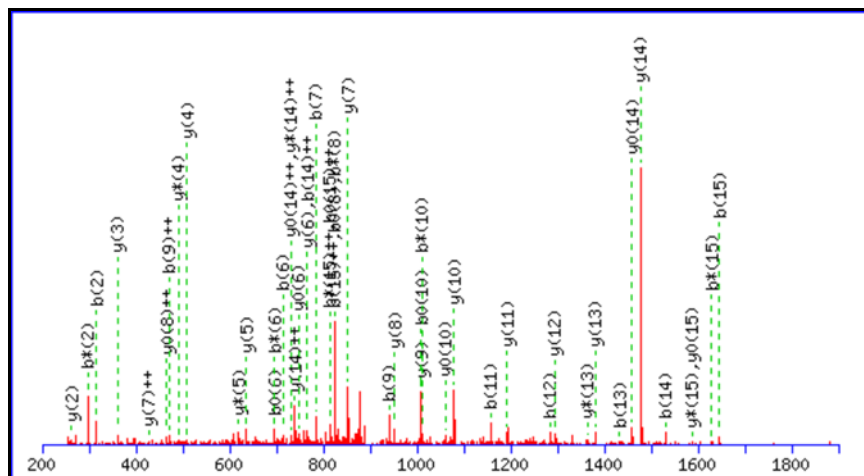

Monoisotopic mass of neutral peptide Mr(calc): 1790.9203

Ions Score: 63 Expect: 0.00013

Matches : 48/170 fragment ions using 99 most intense peaks ([help](#))

| #  | b                | b <sup>++</sup> | b <sup>*</sup>   | b <sup>*++</sup> | b <sup>0</sup>   | b <sup>0++</sup> | Seq. | y                | y <sup>++</sup> | y <sup>*</sup>   | y <sup>*++</sup> | y <sup>0</sup>   | y <sup>0++</sup> | #  |
|----|------------------|-----------------|------------------|------------------|------------------|------------------|------|------------------|-----------------|------------------|------------------|------------------|------------------|----|
| 1  | 187.0866         | 94.0469         |                  |                  |                  |                  | W    |                  |                 |                  |                  |                  |                  | 16 |
| 2  | <b>315.1816</b>  | 158.0944        | <b>298.1550</b>  | 149.5811         |                  |                  | K    | 1605.8483        | 803.4278        | <b>1588.8217</b> | 794.9145         | <b>1587.8377</b> | 794.4225         | 15 |
| 3  | 412.2343         | 206.6208        | 395.2078         | 198.1075         |                  |                  | P    | <b>1477.7533</b> | <b>739.3803</b> | 1460.7268        | <b>730.8670</b>  | <b>1459.7427</b> | <b>730.3750</b>  | 14 |
| 4  | 499.2663         | 250.1368        | 482.2398         | 241.6235         | 481.2558         | 241.1315         | S    | <b>1380.7005</b> | 690.8539        | <b>1363.6740</b> | 682.3406         | 1362.6900        | 681.8486         | 13 |
| 5  | 600.3140         | 300.6606        | 583.2875         | 292.1474         | 582.3035         | 291.6554         | T    | <b>1293.6685</b> | 647.3379        | 1276.6420        | 638.8246         | 1275.6579        | 638.3326         | 12 |
| 6  | <b>713.3981</b>  | 357.2027        | <b>696.3715</b>  | 348.6894         | <b>695.3875</b>  | 348.1974         | L    | <b>1192.6208</b> | 596.8141        | 1175.5943        | 588.3008         | 1174.6103        | 587.8088         | 11 |
| 7  | <b>784.4352</b>  | 392.7212        | 767.4087         | 384.2080         | 766.4246         | 383.7160         | A    | <b>1079.5368</b> | 540.2720        | 1062.5102        | 531.7587         | <b>1061.5262</b> | 531.2667         | 10 |
| 8  | 841.4567         | 421.2320        | <b>824.4301</b>  | 412.7187         | <b>823.4461</b>  | 412.2267         | G    | <b>1008.4997</b> | 504.7535        | 991.4731         | 496.2402         | 990.4891         | 495.7482         | 9  |
| 9  | <b>940.5251</b>  | <b>470.7662</b> | 923.4985         | 462.2529         | 922.5145         | 461.7609         | V    | <b>951.4782</b>  | 476.2427        | 934.4516         | 467.7295         | 933.4676         | <b>467.2374</b>  | 8  |
| 10 | 1027.5571        | 514.2822        | <b>1010.5306</b> | 505.7689         | <b>1009.5465</b> | 505.2769         | S    | <b>852.4098</b>  | <b>426.7085</b> | 835.3832         | 418.1953         | 834.3992         | 417.7032         | 7  |
| 11 | <b>1156.5997</b> | 578.8035        | 1139.5732        | 570.2902         | 1138.5891        | 569.7982         | E    | <b>765.3777</b>  | 383.1925        | 748.3512         | 374.6792         | <b>747.3672</b>  | 374.1872         | 6  |
| 12 | <b>1284.6583</b> | 642.8328        | 1267.6317        | 634.3195         | 1266.6477        | 633.8275         | Q    | <b>636.3352</b>  | 318.6712        | <b>619.3086</b>  | 310.1579         | 618.3246         | 309.6659         | 5  |
| 13 | <b>1431.7267</b> | 716.3670        | 1414.7001        | 707.8537         | 1413.7161        | 707.3617         | F    | <b>508.2766</b>  | 254.6419        | <b>491.2500</b>  | 246.1287         | 490.2660         | 245.6366         | 4  |
| 14 | <b>1530.7951</b> | <b>765.9012</b> | 1513.7686        | 757.3879         | 1512.7845        | 756.8959         | V    | <b>361.2082</b>  | 181.1077        | 344.1816         | 172.5944         | 343.1976         | 172.1024         | 3  |
| 15 | <b>1645.8220</b> | <b>823.4147</b> | <b>1628.7955</b> | <b>814.9014</b>  | 1627.8115        | <b>814.4094</b>  | D    | <b>262.1397</b>  | 131.5735        | 245.1132         | 123.0602         | 244.1292         | 122.5682         | 2  |
| 16 |                  |                 |                  |                  |                  |                  | K    | 147.1128         | 74.0600         | 130.0863         | 65.5468          |                  |                  | 1  |

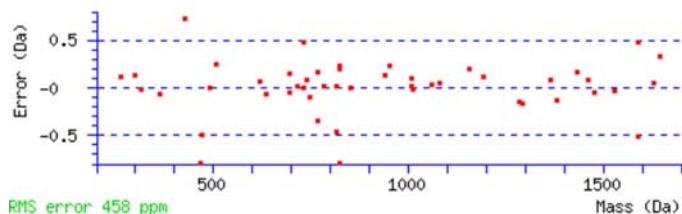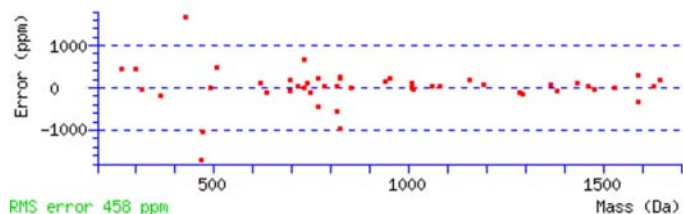

NCBI BLAST search of [WKPSTLAGVSEQFVDK](#)

(Parameters: blastp, nr protein database, expect=20000, no filter, PAM30)

Other BLAST [web gateways](#)

**All matches to this query**

| Score | Mr(calc): | Delta  | Sequence                          |
|-------|-----------|--------|-----------------------------------|
| 63.0  | 1790.9203 | 1.9924 | <a href="#">WKPSTLAGVSEQFVDK</a>  |
| 11.7  | 1790.9825 | 1.9302 | <a href="#">EANALCHRLPVLNTLK</a>  |
| 10.1  | 1791.9591 | 0.9536 | <a href="#">SANVRKPQTSSQPPPAK</a> |
| 3.8   | 1791.7280 | 1.1847 | <a href="#">HCWNCYHVLDCTK</a>     |
| 3.1   | 1791.8688 | 1.0439 | <a href="#">CAWIPVQYPVISECK</a>   |
| 2.7   | 1791.7693 | 1.1434 | <a href="#">DRELGNVDAGENSADCK</a> |
| 2.1   | 1790.7539 | 2.1589 | <a href="#">NGYCTVCTGKCHYTK</a>   |
| 1.9   | 1791.9731 | 0.9397 | <a href="#">SPIHVKVEPSVDTSGIK</a> |
| 1.7   | 1792.7430 | 0.1697 | <a href="#">CSGLIDCMDLESNEHK</a>  |
| 1.6   | 1791.8275 | 1.0852 | <a href="#">ESVHTANSTQEEYVAK</a>  |

Mascot: <http://www.matrixscience.com/>

# MASCOT SCIENCE Mascot Search Results

## Peptide View

MS/MS Fragmentation of **YQAITATLEEK**

Found in [gi|47086477|ref|NP\\_997949.1](#), ribosomal protein L13a [Danio rerio]

Match to Query 15930: 1267.492724 from(634.753638,2+) index(8104)

Data file TCDD\_0530.dta

Click mouse within plot area to zoom in by factor of two about that point

Or, Plot from  to  Da

Label all possible matches  Label matches used for scoring

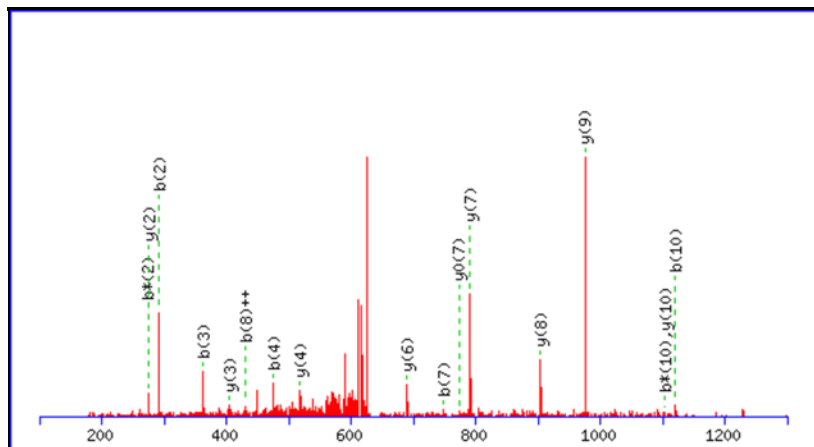

Monoisotopic mass of neutral peptide Mr(calc): 1265.6503

Ions Score: 41 Expect: 0.022

Matches : 17/108 fragment ions using 44 most intense peaks ([help](#))

| #  | b                | b <sup>++</sup> | b*               | b <sup>*++</sup> | b <sup>0</sup> | b <sup>0++</sup> | Seq. | y                | y <sup>++</sup> | y*        | y <sup>*++</sup> | y <sup>0</sup>  | y <sup>0++</sup> | #  |
|----|------------------|-----------------|------------------|------------------|----------------|------------------|------|------------------|-----------------|-----------|------------------|-----------------|------------------|----|
| 1  | 164.0706         | 82.5389         |                  |                  |                |                  | Y    |                  |                 |           |                  |                 |                  | 11 |
| 2  | <b>292.1292</b>  | 146.5682        | <b>275.1026</b>  | 138.0550         |                |                  | Q    | <b>1103.5943</b> | 552.3008        | 1086.5677 | 543.7875         | 1085.5837       | 543.2955         | 10 |
| 3  | <b>363.1663</b>  | 182.0868        | 346.1397         | 173.5735         |                |                  | A    | <b>975.5357</b>  | 488.2715        | 958.5092  | 479.7582         | 957.5251        | 479.2662         | 9  |
| 4  | <b>476.2504</b>  | 238.6288        | 459.2238         | 230.1155         |                |                  | I    | <b>904.4986</b>  | 452.7529        | 887.4720  | 444.2397         | 886.4880        | 443.7477         | 8  |
| 5  | 577.2980         | 289.1527        | 560.2715         | 280.6394         | 559.2875       | 280.1474         | T    | <b>791.4145</b>  | 396.2109        | 774.3880  | 387.6976         | <b>773.4040</b> | 387.2056         | 7  |
| 6  | 648.3352         | 324.6712        | 631.3086         | 316.1579         | 630.3246       | 315.6659         | A    | <b>690.3668</b>  | 345.6871        | 673.3403  | 337.1738         | 672.3563        | 336.6818         | 6  |
| 7  | <b>749.3828</b>  | 375.1951        | 732.3563         | 366.6818         | 731.3723       | 366.1898         | T    | 619.3297         | 310.1685        | 602.3032  | 301.6552         | 601.3192        | 301.1632         | 5  |
| 8  | 862.4669         | <b>431.7371</b> | 845.4403         | 423.2238         | 844.4563       | 422.7318         | L    | <b>518.2821</b>  | 259.6447        | 501.2555  | 251.1314         | 500.2715        | 250.6394         | 4  |
| 9  | 991.5095         | 496.2584        | 974.4829         | 487.7451         | 973.4989       | 487.2531         | E    | <b>405.1980</b>  | 203.1026        | 388.1714  | 194.5894         | 387.1874        | 194.0974         | 3  |
| 10 | <b>1120.5521</b> | 560.7797        | <b>1103.5255</b> | 552.2664         | 1102.5415      | 551.7744         | E    | <b>276.1554</b>  | 138.5813        | 259.1288  | 130.0681         | 258.1448        | 129.5761         | 2  |
| 11 |                  |                 |                  |                  |                |                  | K    | 147.1128         | 74.0600         | 130.0863  | 65.5468          |                 |                  | 1  |

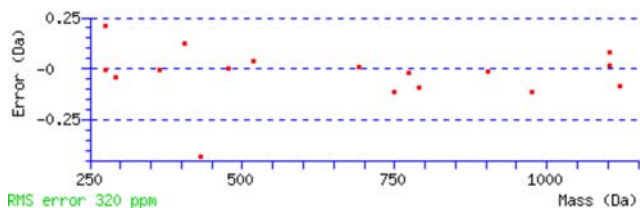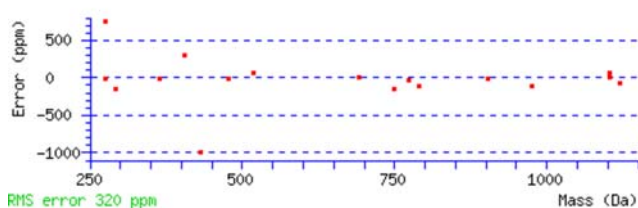

NCBI BLAST search of [YQAITATLEEK](#)

(Parameters: blastp, nr protein database, expect=20000, no filter, PAM30)

Other BLAST [web gateways](#)

All matches to this query

| Score | Mr(calc): | Delta  | Sequence                    |
|-------|-----------|--------|-----------------------------|
| 41.5  | 1265.6503 | 1.8424 | <a href="#">YQAITATLEEK</a> |



|      |           |        |                               |
|------|-----------|--------|-------------------------------|
| 18.4 | 1265.6404 | 1.8523 | <a href="#">KFEGGHYTSLK</a>   |
| 16.6 | 1265.5677 | 1.9251 | <a href="#">YHFEDVAGSNK</a>   |
| 14.2 | 1265.6463 | 1.8464 | <a href="#">SSLSSGPSTTSKK</a> |
| 13.3 | 1265.6000 | 1.8927 | <a href="#">YALQSNNSNQK</a>   |
| 13.3 | 1265.6364 | 1.8563 | <a href="#">KSFLNSAEASGR</a>  |
| 12.9 | 1265.7132 | 1.7795 | <a href="#">GSFILRVFAEK</a>   |
| 12.2 | 1266.5914 | 0.9013 | <a href="#">KFDQCLAEK</a>     |
| 11.6 | 1265.5259 | 1.9668 | <a href="#">SSTDEPGTEESK</a>  |
| 11.5 | 1265.5281 | 1.9646 | <a href="#">CMANEKGDWR</a>    |

**Mascot:** <http://www.matrixscience.com/>

# MASCOT SCIENCE Mascot Search Results

## Peptide View

MS/MS Fragmentation of **EAVDDL GSTLAEVASAAGAVGGMVNSITQSINK**

Found in [gi|57222259|ref|NP\\_001009560.1](#), talin 1 [Danio rerio]

Match to Query 123661: 3175.712724 from(1059.578184,3+) index(6009)

Data file TCDD\_0531.dta

Click mouse within plot area to zoom in by factor of two about that point

Or, Plot from  to  Da

Label all possible matches  Label matches used for scoring

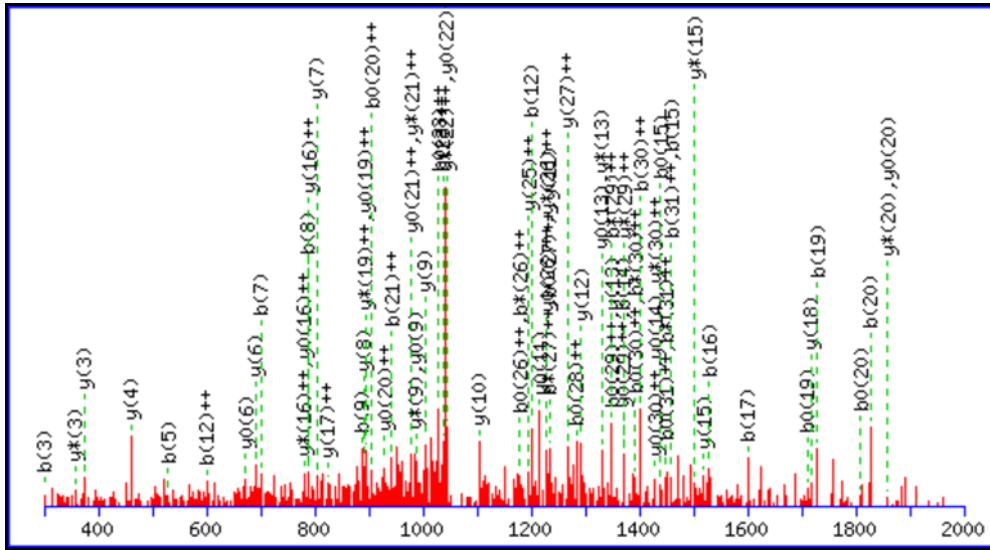

Monoisotopic mass of neutral peptide  $M_r(\text{calc})$ : 3174.5714

Ions Score: 42 Expect: 0.0066

Matches : 75/330 fragment ions using 164 most intense peaks ([help](#))

| #  | b                | b <sup>++</sup> | b* | b <sup>*++</sup> | b <sup>0</sup>   | b <sup>0++</sup> | Seq. | y         | y <sup>++</sup>  | y*               | y <sup>*++</sup> |
|----|------------------|-----------------|----|------------------|------------------|------------------|------|-----------|------------------|------------------|------------------|
| 1  | 130.0499         | 65.5286         |    |                  | 112.0393         | 56.5233          | E    |           |                  |                  |                  |
| 2  | 201.0870         | 101.0471        |    |                  | 183.0764         | 92.0418          | A    | 3046.5361 | 1523.7717        | 3029.5096        | 1515.2584        |
| 3  | <b>300.1554</b>  | 150.5813        |    |                  | 282.1448         | 141.5761         | V    | 2975.4990 | 1488.2531        | 2958.4725        | 1479.7399        |
| 4  | 415.1823         | 208.0948        |    |                  | 397.1718         | 199.0895         | D    | 2876.4306 | 1438.7189        | 2859.4040        | <b>1430.2057</b> |
| 5  | <b>530.2093</b>  | 265.6083        |    |                  | 512.1987         | 256.6030         | D    | 2761.4037 | 1381.2055        | 2744.3771        | <b>1372.6922</b> |
| 6  | 643.2933         | 322.1503        |    |                  | 625.2828         | 313.1450         | L    | 2646.3767 | 1323.6920        | 2629.3502        | 1315.1787        |
| 7  | <b>700.3148</b>  | 350.6610        |    |                  | 682.3042         | 341.6558         | G    | 2533.2926 | <b>1267.1500</b> | 2516.2661        | 1258.6367        |
| 8  | <b>787.3468</b>  | 394.1771        |    |                  | 769.3363         | 385.1718         | S    | 2476.2712 | 1238.6392        | 2459.2446        | <b>1230.1260</b> |
| 9  | <b>888.3945</b>  | 444.7009        |    |                  | 870.3840         | 435.6956         | T    | 2389.2392 | <b>1195.1232</b> | 2372.2126        | 1186.6099        |
| 10 | 1001.4786        | 501.2429        |    |                  | 983.4680         | 492.2376         | L    | 2288.1915 | 1144.5994        | 2271.1649        | 1136.0861        |
| 11 | 1072.5157        | 536.7615        |    |                  | 1054.5051        | 527.7562         | A    | 2175.1074 | 1088.0573        | 2158.0809        | 1079.5441        |
| 12 | <b>1201.5583</b> | <b>601.2828</b> |    |                  | 1183.5477        | 592.2775         | E    | 2104.0703 | 1052.5388        | 2087.0437        | <b>1044.0255</b> |
| 13 | 1300.6267        | 650.8170        |    |                  | 1282.6161        | 641.8117         | V    | 1975.0277 | 988.0175         | 1958.0012        | <b>979.5042</b>  |
| 14 | <b>1371.6638</b> | 686.3355        |    |                  | 1353.6533        | 677.3303         | A    | 1875.9593 | 938.4833         | <b>1858.9327</b> | 929.9700         |
| 15 | <b>1458.6958</b> | 729.8516        |    |                  | <b>1440.6853</b> | 720.8463         | S    | 1804.9222 | 902.9647         | 1787.8956        | <b>894.4515</b>  |

|    |                  |                  |           |                  |                  |                  |          |                  |                 |                  |                 |
|----|------------------|------------------|-----------|------------------|------------------|------------------|----------|------------------|-----------------|------------------|-----------------|
| 16 | <b>1529.7330</b> | 765.3701         |           |                  | 1511.7224        | 756.3648         | <b>A</b> | <b>1717.8901</b> | 859.4487        | 1700.8636        | 850.9354        |
| 17 | <b>1600.7701</b> | 800.8887         |           |                  | 1582.7595        | 791.8834         | <b>A</b> | 1646.8530        | <b>823.9302</b> | 1629.8265        | 815.4169        |
| 18 | 1657.7915        | 829.3994         |           |                  | 1639.7810        | 820.3941         | <b>G</b> | 1575.8159        | <b>788.4116</b> | 1558.7894        | <b>779.8983</b> |
| 19 | <b>1728.8287</b> | 864.9180         |           |                  | <b>1710.8181</b> | 855.9127         | <b>A</b> | <b>1518.7945</b> | 759.9009        | <b>1501.7679</b> | 751.3876        |
| 20 | <b>1827.8971</b> | 914.4522         |           |                  | <b>1809.8865</b> | <b>905.4469</b>  | <b>V</b> | 1447.7573        | 724.3823        | 1430.7308        | 715.8690        |
| 21 | 1884.9185        | <b>942.9629</b>  |           |                  | 1866.9080        | 933.9576         | <b>G</b> | <b>1348.6889</b> | 674.8481        | <b>1331.6624</b> | 666.3348        |
| 22 | 1941.9400        | 971.4736         |           |                  | 1923.9294        | 962.4684         | <b>G</b> | <b>1291.6675</b> | 646.3374        | 1274.6409        | 637.8241        |
| 23 | 2072.9805        | <b>1036.9939</b> |           |                  | 2054.9699        | <b>1027.9886</b> | <b>M</b> | <b>1234.6460</b> | 617.8266        | 1217.6194        | 609.3134        |
| 24 | 2172.0489        | 1086.5281        |           |                  | 2154.0383        | 1077.5228        | <b>V</b> | <b>1103.6055</b> | 552.3064        | 1086.5790        | 543.7931        |
| 25 | 2286.0918        | 1143.5495        | 2269.0653 | 1135.0363        | 2268.0813        | 1134.5443        | <b>N</b> | <b>1004.5371</b> | 502.7722        | <b>987.5106</b>  | 494.2589        |
| 26 | 2373.1238        | 1187.0656        | 2356.0973 | <b>1178.5523</b> | 2355.1133        | <b>1178.0603</b> | <b>S</b> | <b>890.4942</b>  | 445.7507        | 873.4676         | 437.2374        |
| 27 | 2486.2079        | 1243.6076        | 2469.1814 | <b>1235.0943</b> | 2468.1973        | <b>1234.6023</b> | <b>I</b> | <b>803.4621</b>  | 402.2347        | 786.4356         | 393.7214        |
| 28 | 2587.2556        | 1294.1314        | 2570.2290 | 1285.6182        | 2569.2450        | <b>1285.1262</b> | <b>T</b> | <b>690.3781</b>  | 345.6927        | 673.3515         | 337.1794        |
| 29 | 2715.3142        | 1358.1607        | 2698.2876 | <b>1349.6474</b> | 2697.3036        | <b>1349.1554</b> | <b>Q</b> | 589.3304         | 295.1688        | 572.3039         | 286.6556        |
| 30 | 2802.3462        | <b>1401.6767</b> | 2785.3196 | <b>1393.1635</b> | 2784.3356        | <b>1392.6715</b> | <b>S</b> | <b>461.2718</b>  | 231.1395        | 444.2453         | 222.6263        |
| 31 | 2915.4303        | <b>1458.2188</b> | 2898.4037 | <b>1449.7055</b> | 2897.4197        | <b>1449.2135</b> | <b>I</b> | <b>374.2398</b>  | 187.6235        | <b>357.2132</b>  | 179.1103        |
| 32 | 3029.4732        | 1515.2402        | 3012.4466 | 1506.7270        | 3011.4626        | 1506.2349        | <b>N</b> | 261.1557         | 131.0815        | 244.1292         | 122.5682        |
| 33 |                  |                  |           |                  |                  |                  | <b>K</b> | 147.1128         | 74.0600         | 130.0863         | 65.5468         |

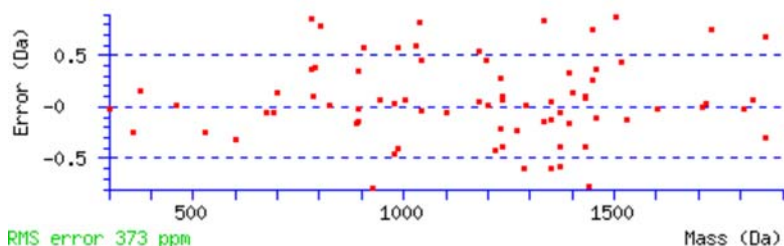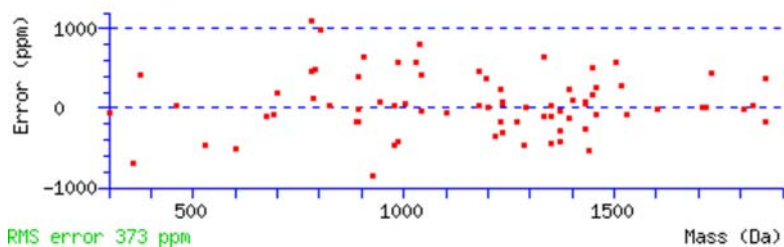

NCBI **BLAST** search of [EAVDDLGSTLAEVASAAGAVGGMVNSITQSINK](#)

(Parameters: blastp, nr protein database, expect=20000, no filter, PAM30)

Other BLAST [web gateways](#)

**All matches to this query**

| Score | Mr(calc): | Delta   | Sequence                                          |
|-------|-----------|---------|---------------------------------------------------|
| 42.5  | 3174.5714 | 1.1413  | <a href="#">EAVDDLGSTLAEVASAAGAVGGMVNSITQSINK</a> |
| 5.2   | 3173.6721 | 2.0407  | <a href="#">ALDLSAGLKHTLAQFTLSSQSSLGGPAAFSK</a>   |
| 4.5   | 3175.4139 | 0.2988  | <a href="#">DEEDFSELEPDEQLVCSVTEITEHLGR</a>       |
| 3.8   | 3175.4532 | 0.2595  | <a href="#">VYSNADCNNICHGRITPNMICAGTRPGGK</a>     |
| 3.8   | 3176.4966 | -0.7838 | <a href="#">AEEDSPCVVTLCSPGSASAISLQVVSEAR</a>     |
| 3.3   | 3177.4212 | -1.7085 | <a href="#">SPHSSVHEHVLGALCCLVEDSPRGMDCR</a>      |

|     |           |        |                                                |
|-----|-----------|--------|------------------------------------------------|
| 2.5 | 3175.6639 | 0.0488 | <a href="#">TIQLHNGASPGFAPLGEIELTIRHSPQR</a>   |
| 2.0 | 3174.3910 | 1.3217 | <a href="#">SGVEAGFESGPEEDFLNLGAEACNFMQAQK</a> |
| 1.5 | 3173.3138 | 2.3990 | <a href="#">QESGYMNPPSASQSHACHSHSYPMNPSSR</a>  |
| 0.8 | 3174.4467 | 1.2660 | <a href="#">HMMIHTGEKPHTCTQCGKSFTQSSSLNK</a>   |

**Mascot:** <http://www.matrixscience.com/>

# MASCOT SCIENCE Mascot Search Results

## Peptide View

MS/MS Fragmentation of **EVDEVDAALSDLETTLEGGK**

Found in [gi|189531190|ref|XP\\_685536.2](#), PREDICTED: im:7145859 isoform 1 [Danio rerio]

Match to Query 56997: 2102.922724 from(1052.468638,2+) index(4044)

Data file TCDD\_0531.dta

Click mouse within plot area to zoom in by factor of two about that point

Or, Plot from  to  Da

Label all possible matches  Label matches used for scoring

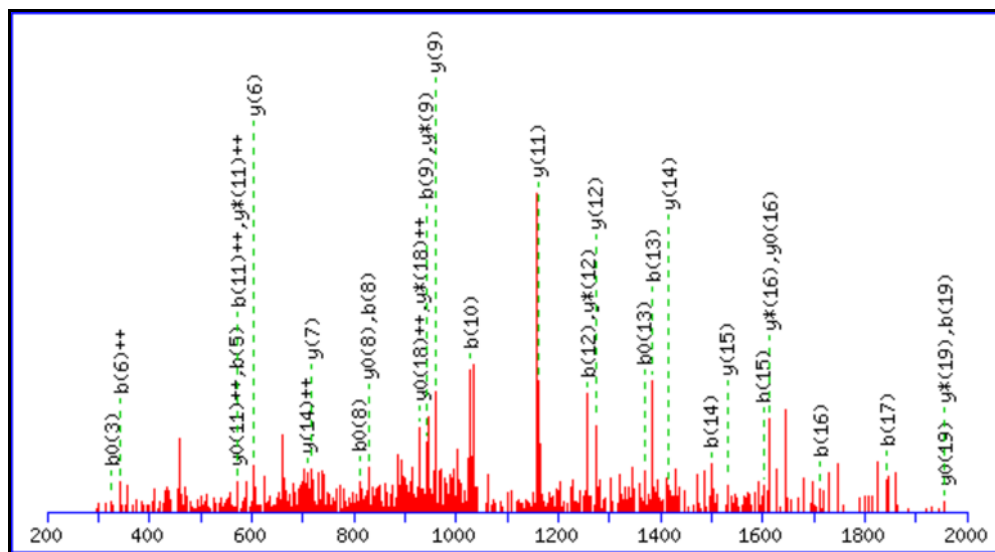

Monoisotopic mass of neutral peptide  $M_r(\text{calc})$ : 2102.0267

Ions Score: 42 Expect: 0.012

Matches : 36/184 fragment ions using 85 most intense peaks ([help](#))

| #  | b         | b <sup>++</sup> | b <sup>0</sup> | b <sup>0++</sup> | Seq. | y         | y <sup>++</sup> | y <sup>*</sup> | y <sup>*++</sup> | y <sup>0</sup> | y <sup>0++</sup> | #  |
|----|-----------|-----------------|----------------|------------------|------|-----------|-----------------|----------------|------------------|----------------|------------------|----|
| 1  | 130.0499  | 65.5286         | 112.0393       | 56.5233          | E    |           |                 |                |                  |                |                  | 20 |
| 2  | 229.1183  | 115.0628        | 211.1077       | 106.0575         | V    | 1973.9914 | 987.4993        | 1956.9648      | 978.9860         | 1955.9808      | 978.4940         | 19 |
| 3  | 344.1452  | 172.5763        | 326.1347       | 163.5710         | D    | 1874.9229 | 937.9651        | 1857.8964      | 929.4518         | 1856.9124      | 928.9598         | 18 |
| 4  | 473.1878  | 237.0975        | 455.1773       | 228.0923         | E    | 1759.8960 | 880.4516        | 1742.8695      | 871.9384         | 1741.8854      | 871.4464         | 17 |
| 5  | 572.2562  | 286.6318        | 554.2457       | 277.6265         | V    | 1630.8534 | 815.9303        | 1613.8269      | 807.4171         | 1612.8428      | 806.9251         | 16 |
| 6  | 687.2832  | 344.1452        | 669.2726       | 335.1399         | D    | 1531.7850 | 766.3961        | 1514.7584      | 757.8829         | 1513.7744      | 757.3909         | 15 |
| 7  | 758.3203  | 379.6638        | 740.3097       | 370.6585         | A    | 1416.7581 | 708.8827        | 1399.7315      | 700.3694         | 1398.7475      | 699.8774         | 14 |
| 8  | 829.3574  | 415.1823        | 811.3468       | 406.1771         | A    | 1345.7209 | 673.3641        | 1328.6944      | 664.8508         | 1327.7104      | 664.3588         | 13 |
| 9  | 942.4415  | 471.7244        | 924.4309       | 462.7191         | L    | 1274.6838 | 637.8455        | 1257.6573      | 629.3323         | 1256.6733      | 628.8403         | 12 |
| 10 | 1029.4735 | 515.2404        | 1011.4629      | 506.2351         | S    | 1161.5998 | 581.3035        | 1144.5732      | 572.7902         | 1143.5892      | 572.2982         | 11 |
| 11 | 1144.5004 | 572.7539        | 1126.4899      | 563.7486         | D    | 1074.5677 | 537.7875        | 1057.5412      | 529.2742         | 1056.5572      | 528.7822         | 10 |
| 12 | 1257.5845 | 629.2959        | 1239.5739      | 620.2906         | L    | 959.5408  | 480.2740        | 942.5142       | 471.7608         | 941.5302       | 471.2687         | 9  |
| 13 | 1386.6271 | 693.8172        | 1368.6165      | 684.8119         | E    | 846.4567  | 423.7320        | 829.4302       | 415.2187         | 828.4462       | 414.7267         | 8  |
| 14 | 1499.7112 | 750.3592        | 1481.7006      | 741.3539         | I    | 717.4141  | 359.2107        | 700.3876       | 350.6974         | 699.4036       | 350.2054         | 7  |

|    |                  |          |           |          |          |                 |          |          |          |          |          |          |
|----|------------------|----------|-----------|----------|----------|-----------------|----------|----------|----------|----------|----------|----------|
| 15 | <b>1600.7588</b> | 800.8831 | 1582.7483 | 791.8778 | <b>T</b> | <b>604.3301</b> | 302.6687 | 587.3035 | 294.1554 | 586.3195 | 293.6634 | <b>6</b> |
| 16 | <b>1713.8429</b> | 857.4251 | 1695.8323 | 848.4198 | <b>L</b> | 503.2824        | 252.1448 | 486.2558 | 243.6316 | 485.2718 | 243.1395 | <b>5</b> |
| 17 | <b>1842.8855</b> | 921.9464 | 1824.8749 | 912.9411 | <b>E</b> | 390.1983        | 195.6028 | 373.1718 | 187.0895 | 372.1878 | 186.5975 | <b>4</b> |
| 18 | 1899.9070        | 950.4571 | 1881.8964 | 941.4518 | <b>G</b> | 261.1557        | 131.0815 | 244.1292 | 122.5682 |          |          | <b>3</b> |
| 19 | <b>1956.9284</b> | 978.9678 | 1938.9179 | 969.9626 | <b>G</b> | 204.1343        | 102.5708 | 187.1077 | 94.0575  |          |          | <b>2</b> |
| 20 |                  |          |           |          | <b>K</b> | 147.1128        | 74.0600  | 130.0863 | 65.5468  |          |          | <b>1</b> |

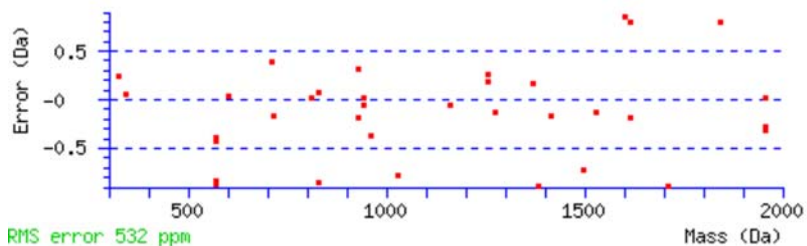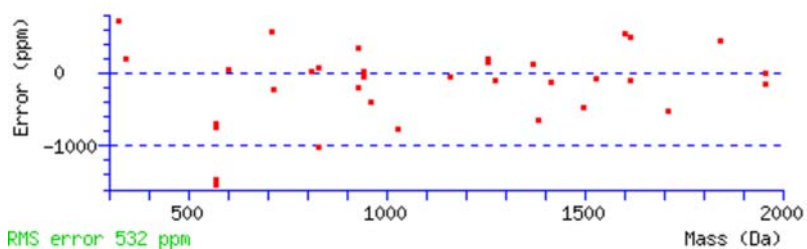

NCBI **BLAST** search of [EVDEVDAALSDLEITLEGGK](#)  
 (Parameters: blastp, nr protein database, expect=20000, no filter, PAM30)  
 Other BLAST [web gateways](#)

**All matches to this query**

| Score | Mr(calc): | Delta   | Sequence                             |
|-------|-----------|---------|--------------------------------------|
| 49.4  | 2104.0689 | -1.1461 | <a href="#">FTGSVDIQVVGDDLVTNPK</a>  |
| 42.3  | 2102.0267 | 0.8961  | <a href="#">EVDEVDAALSDLEITLEGGK</a> |
| 8.7   | 2101.9651 | 0.9576  | <a href="#">DEITQQTEQAEPDDVEK</a>    |
| 7.1   | 2103.0452 | -0.1225 | <a href="#">VETLEGAQVNAQQMGCKGLK</a> |
| 6.6   | 2105.0869 | -2.1642 | <a href="#">QVCVCVCVSLALNLCIALK</a>  |
| 6.6   | 2105.0869 | -2.1642 | <a href="#">QVCVCVCVSLALNLCIALK</a>  |
| 5.9   | 2104.1568 | -1.2341 | <a href="#">QTKPTFKSYLPLQTDLK</a>    |
| 4.3   | 2102.0506 | 0.8721  | <a href="#">VCAINKAGAGPYSDVSIFYK</a> |
| 3.9   | 2105.0715 | -2.1487 | <a href="#">SSGVFELKVLSTSTSSVCK</a>  |
| 3.8   | 2101.0990 | 1.8237  | <a href="#">ILETFKINSDNHGLTLMR</a>   |

Mascot: <http://www.matrixscience.com/>

# **MATRIX** SCIENCE Mascot Search Results

## Peptide View

MS/MS Fragmentation of **QLADAIKLR**

Found in [gi|189530625|ref|XP\\_001920330.1](#), PREDICTED: similar to spectrin repeat containing, nuclear envelope 1 [Danio rerio]

Match to Query 9013: 1098.742724 from(550.378638,2+) index(21937)

Data file TCDD\_0531.dta

Click mouse within plot area to zoom in by factor of two about that point

Or, Plot from  to  Da

Label all possible matches  Label matches used for scoring

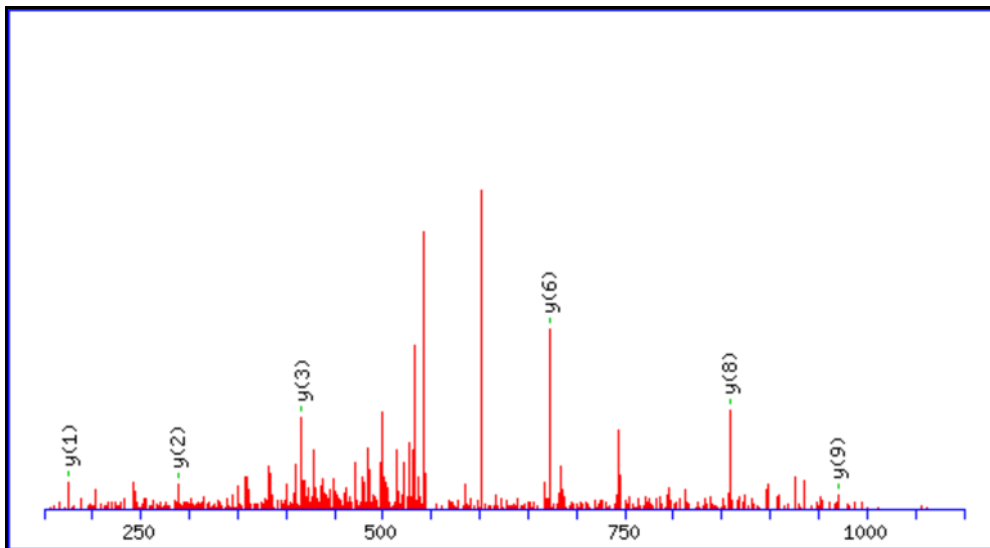

Monoisotopic mass of neutral peptide  $M_r(\text{calc})$ : 1097.6557

Ions Score: 45 Expect: 0.01

Matches : 6/90 fragment ions using 10 most intense peaks ([help](#))

| #  | b        | b <sup>++</sup> | b*       | b <sup>*++</sup> | b <sup>0</sup> | b <sup>0++</sup> | Seq. | y        | y <sup>++</sup> | y*       | y <sup>*++</sup> | y <sup>0</sup> |    |
|----|----------|-----------------|----------|------------------|----------------|------------------|------|----------|-----------------|----------|------------------|----------------|----|
| 1  | 129.0659 | 65.0366         | 112.0393 | 56.5233          |                |                  | Q    |          |                 |          |                  |                |    |
| 2  | 242.1499 | 121.5786        | 225.1234 | 113.0653         |                |                  | L    | 970.6044 | 485.8058        | 953.5778 | 477.2926         | 952.5938       | 47 |
| 3  | 313.1870 | 157.0972        | 296.1605 | 148.5839         |                |                  | A    | 857.5203 | 429.2638        | 840.4938 | 420.7505         | 839.5098       | 42 |
| 4  | 428.2140 | 214.6106        | 411.1874 | 206.0974         | 410.2034       | 205.6053         | D    | 786.4832 | 393.7452        | 769.4567 | 385.2320         | 768.4726       | 38 |
| 5  | 499.2511 | 250.1292        | 482.2245 | 241.6159         | 481.2405       | 241.1239         | A    | 671.4563 | 336.2318        | 654.4297 | 327.7185         |                |    |
| 6  | 612.3352 | 306.6712        | 595.3086 | 298.1579         | 594.3246       | 297.6659         | I    | 600.4192 | 300.7132        | 583.3926 | 292.1999         |                |    |
| 7  | 683.3723 | 342.1898        | 666.3457 | 333.6765         | 665.3617       | 333.1845         | A    | 487.3351 | 244.1712        | 470.3085 | 235.6579         |                |    |
| 8  | 811.4672 | 406.2373        | 794.4407 | 397.7240         | 793.4567       | 397.2320         | K    | 416.2980 | 208.6526        | 399.2714 | 200.1394         |                |    |
| 9  | 924.5513 | 462.7793        | 907.5247 | 454.2660         | 906.5407       | 453.7740         | L    | 288.2030 | 144.6051        | 271.1765 | 136.0919         |                |    |
| 10 |          |                 |          |                  |                |                  | R    | 175.1190 | 88.0631         | 158.0924 | 79.5498          |                |    |

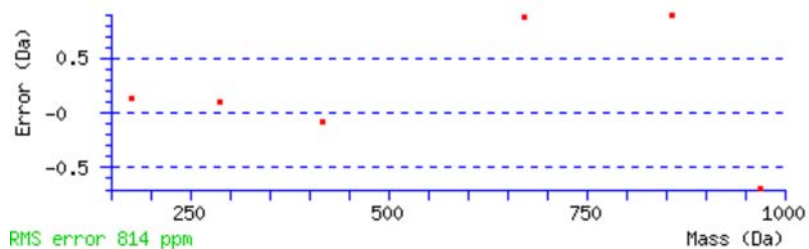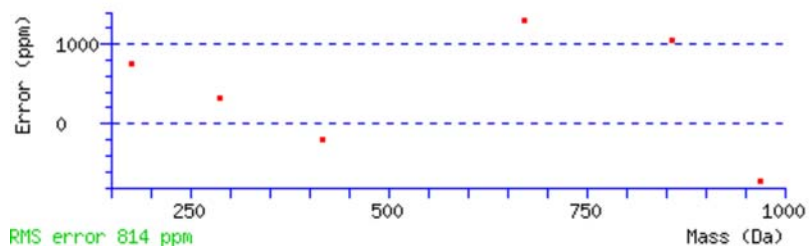

NCBI **BLAST** search of [QLADAIAKLR](#)

(Parameters: blastp, nr protein database, expect=20000, no filter, PAM30)

Other BLAST [web gateways](#)

**All matches to this query**

| Score | Mr(calc): | Delta   | Sequence                     |
|-------|-----------|---------|------------------------------|
| 63.0  | 1098.5782 | 0.1646  | <a href="#">AGLDAAGQGALR</a> |
| 45.3  | 1097.6557 | 1.0871  | <a href="#">QLADAIAKLR</a>   |
| 36.5  | 1098.6145 | 0.1282  | <a href="#">QLADALKANR</a>   |
| 25.6  | 1099.5370 | -0.7943 | <a href="#">SSGLANAPNNR</a>  |
| 23.1  | 1098.6145 | 0.1282  | <a href="#">KLNEAQLR</a>     |
| 23.1  | 1098.6761 | 0.0667  | <a href="#">QLLSLEKIR</a>    |
| 22.8  | 1098.6145 | 0.1282  | <a href="#">LQGELDRLR</a>    |
| 21.3  | 1098.6397 | 0.1031  | <a href="#">LKQELAE LR</a>   |
| 19.8  | 1098.6761 | 0.0667  | <a href="#">LKELLSQLR</a>    |
| 19.8  | 1097.6556 | 1.0871  | <a href="#">EILAANAIRK</a>   |

Mascot: <http://www.matrixscience.com/>



# MASCOT SCIENCE Mascot Search Results

## Peptide View

MS/MS Fragmentation of **VILIQEQLSK**

Found in [gi|125843259|ref|XP\\_690811.2](#), PREDICTED: polymerase (RNA) III (DNA directed) polypeptide B [Danio rerio]

Match to Query 11544: 1169.292724 from(585.653638,2+) index(9496)

Data file TCDD\_0531.dta

Click mouse within plot area to zoom in by factor of two about that point

Or, Plot from  to  Da

Label all possible matches  Label matches used for scoring

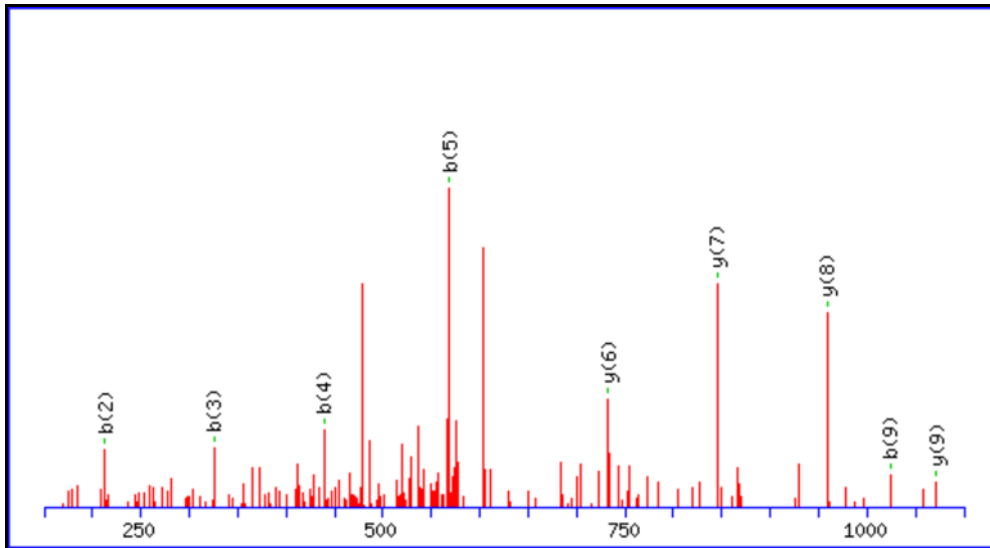

Monoisotopic mass of neutral peptide  $M_r(\text{calc})$ : 1169.7019

Ions Score: 45 Expect: 0.011

Matches : 9/88 fragment ions using 10 most intense peaks ([help](#))

| #  | b                | b <sup>++</sup> | b*        | b <sup>***</sup> | b <sup>0</sup> | b <sup>0++</sup> | Seq. | y                | y <sup>++</sup> | y*        | y <sup>***</sup> | y <sup>0</sup> |
|----|------------------|-----------------|-----------|------------------|----------------|------------------|------|------------------|-----------------|-----------|------------------|----------------|
| 1  | 100.0757         | 50.5415         |           |                  |                |                  | V    |                  |                 |           |                  |                |
| 2  | <b>213.1598</b>  | 107.0835        |           |                  |                |                  | I    | <b>1071.6408</b> | 536.3241        | 1054.6143 | 527.8108         | 1053.6         |
| 3  | <b>326.2438</b>  | 163.6255        |           |                  |                |                  | L    | <b>958.5568</b>  | 479.7820        | 941.5302  | 471.2688         | 940.5          |
| 4  | <b>439.3279</b>  | 220.1676        |           |                  |                |                  | I    | <b>845.4727</b>  | 423.2400        | 828.4462  | 414.7267         | 827.4          |
| 5  | <b>567.3865</b>  | 284.1969        | 550.3599  | 275.6836         |                |                  | Q    | <b>732.3886</b>  | 366.6980        | 715.3621  | 358.1847         | 714.3          |
| 6  | 696.4291         | 348.7182        | 679.4025  | 340.2049         | 678.4185       | 339.7129         | E    | 604.3301         | 302.6687        | 587.3035  | 294.1554         | 586.3          |
| 7  | 824.4876         | 412.7475        | 807.4611  | 404.2342         | 806.4771       | 403.7422         | Q    | 475.2875         | 238.1474        | 458.2609  | 229.6341         | 457.2          |
| 8  | 937.5717         | 469.2895        | 920.5451  | 460.7762         | 919.5611       | 460.2842         | L    | 347.2289         | 174.1181        | 330.2023  | 165.6048         | 329.2          |
| 9  | <b>1024.6037</b> | 512.8055        | 1007.5772 | 504.2922         | 1006.5932      | 503.8002         | S    | 234.1448         | 117.5761        | 217.1183  | 109.0628         | 216.1          |
| 10 |                  |                 |           |                  |                |                  | K    | 147.1128         | 74.0600         | 130.0863  | 65.5468          |                |

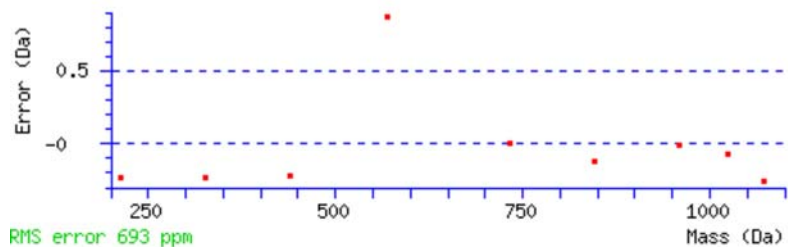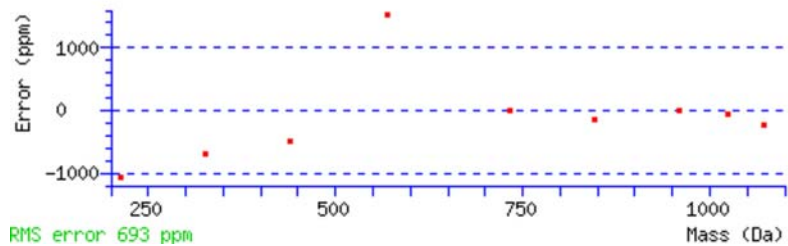

NCBI **BLAST** search of [VILIQEQLSK](#)

(Parameters: blastp, nr protein database, expect=20000, no filter, PAM30)

Other BLAST [web gateways](#)

**All matches to this query**

| Score | Mr(calc): | Delta   | Sequence                    |
|-------|-----------|---------|-----------------------------|
| 44.6  | 1169.7019 | -0.4092 | <a href="#">VILIQEQLSK</a>  |
| 36.5  | 1169.6656 | -0.3728 | <a href="#">VLLLIDDQNK</a>  |
| 30.1  | 1169.6656 | -0.3728 | <a href="#">LVILEGELER</a>  |
| 26.7  | 1169.7132 | -0.4205 | <a href="#">IVLLGDRSIGK</a> |
| 23.3  | 1169.6669 | -0.3742 | <a href="#">VLNHVLGGPHK</a> |
| 23.1  | 1169.6404 | -0.3477 | <a href="#">NPNLQTSGVLK</a> |
| 14.7  | 1171.6812 | -2.3885 | <a href="#">TLIELQKEAK</a>  |
| 12.1  | 1169.7132 | -0.4205 | <a href="#">LVLTNGKLQGK</a> |
| 12.1  | 1169.6656 | -0.3728 | <a href="#">VLLVELEEAR</a>  |
| 10.1  | 1168.6492 | 0.6435  | <a href="#">VIEGSFVYKK</a>  |

**Mascot:** <http://www.matrixscience.com/>
