# Supplementary material
Source: PubMed Central journal article supplement (PMC3740750)
Supplement: NIHMS491545-supplement-3_si_001.pdf [file NIHMS491545-supplement-3_si_001.pdf]

**Supplemental Table 1 Protein identifications from TCDD treated and control zebrafish hearts  
TCDD replicate 1**

| Protein # | Accession ID | Protein name                                      | Protein coverage | length   | peptide m/z       | peptide M <sub>rexp</sub> t | peptide M <sub>r</sub> calc | peptide score | pep_expect | peptide sequence        |
|-----------|--------------|---------------------------------------------------|------------------|----------|-------------------|-----------------------------|-----------------------------|---------------|------------|-------------------------|
| 1         | gi 41053652  | myoglobin [Danio rerio]                           | 94.6             | 147      | 550.49            | 1098.97                     | 1098.58                     | 69.68         | 0.00012    | AGLDAAGQGALR            |
|           |              |                                                   |                  |          | 780.21            | 1558.40                     | 1557.74                     | 111.12        | 7.70E-09   | VMDAVIDGIDGYYK          |
|           |              |                                                   |                  |          | 1010.02           | 2018.03                     | 2020.10                     | 89.88         | 8.80E-07   | GDHAALLKPLANTHANIHK     |
|           |              |                                                   |                  |          | 1110.00           | 2217.98                     | 2219.23                     | 105.42        | 2.30E-08   | AKGDHAALLKPLANTHANIHK   |
|           |              |                                                   |                  |          | 1128.60           | 2255.18                     | 2253.18                     | 112.98        | 4.10E-09   | FSGISQGDLAGSPAVAAHGATV  |
|           |              |                                                   |                  |          | 946.49            | 2836.43                     | 2834.54                     | 64.80         | 0.00021    | GDHAALLKPLANTHANIHKVALN |
| 2         | gi 163644263 | ventricular myosin heavy chain-like [Danio rerio] | 52.6             | 1936     | 1012.84           | 3035.50                     | 3033.67                     | 45.05         | 0.019      | AKGDHAALLKPLANTHANIHKV# |
|           |              |                                                   |                  |          | 496.09            | 990.16                      | 989.50                      | 39.61         | 0.13       | SNNFQKPR                |
|           |              |                                                   |                  |          | 1180.66           | 1179.65                     | 1179.58                     | 47.68         | 0.017      | DFEISQLNSK              |
|           |              |                                                   |                  |          | 609.19            | 1216.37                     | 1215.63                     | 54.25         | 0.0044     | AGLLGQLEEMR             |
|           |              |                                                   |                  |          | 1224.67           | 1223.66                     | 1223.61                     | 43.14         | 0.046      | TKYETDAIQR              |
|           |              |                                                   |                  |          | 621.00            | 1239.98                     | 1237.63                     | 51.96         | 0.0065     | EADVLQQNPPK             |
|           |              |                                                   |                  |          | 641.99            | 1281.96                     | 1281.54                     | 41.73         | 0.067      | EQYEEEEQAK              |
|           |              |                                                   |                  |          | 643.04            | 1284.06                     | 1282.57                     | 37.91         | 0.16       | ELTYQTEEDR              |
|           |              |                                                   |                  |          | 645.12            | 1288.22                     | 1288.63                     | 47.26         | 0.02       | DSQLQLDDSLR             |
|           |              |                                                   |                  |          | 654.30            | 1306.58                     | 1305.58                     | 40.69         | 0.089      | ELECEVEAEQK             |
|           |              |                                                   |                  |          | 655.46            | 1308.91                     | 1307.64                     | 77.55         | 1.70E-05   | NSFSQQLEDLK             |
|           |              |                                                   |                  |          | 685.16            | 1368.31                     | 1367.63                     | 47.57         | 0.017      | LQHELDEAEER             |
|           |              |                                                   |                  |          | 699.56            | 1397.10                     | 1397.75                     | 86.37         | 2.20E-06   | NALLQAELEELR            |
|           |              |                                                   |                  |          | 708.41            | 1414.80                     | 1414.73                     | 99.51         | 1.20E-07   | LAEQELLDVTER            |
|           |              |                                                   |                  |          | 733.14            | 1464.26                     | 1463.74                     | 77.88         | 1.60E-05   | NSFSQQLEDLKR            |
|           |              |                                                   |                  |          | 738.45            | 1474.89                     | 1473.68                     | 79.64         | 1.10E-05   | VEELEEELEAER            |
|           |              |                                                   |                  |          | 748.98            | 1495.95                     | 1495.73                     | 61.03         | 0.00074    | KLQHELDEAEER            |
|           |              |                                                   |                  |          | 751.13            | 1500.24                     | 1499.75                     | 107.00        | 2.00E-08   | LQEAEAAVEAVNAK          |
|           |              |                                                   |                  |          | 752.60            | 1503.19                     | 1502.76                     | 72.06         | 6.30E-05   | ENQSILITGESGAGK         |
|           |              |                                                   |                  |          | 1540.74           | 1539.73                     | 1539.77                     | 67.06         | 0.00019    | DYHIFYQILSNK            |
|           |              |                                                   |                  |          | 771.81            | 1541.61                     | 1541.83                     | 41.93         | 0.063      | IDDEQSIIIQLQK           |
|           |              |                                                   |                  |          | 772.48            | 1542.94                     | 1542.83                     | 83.14         | 4.90E-06   | KLAEQELLDVTER           |
|           |              |                                                   |                  |          | 772.58            | 1543.15                     | 1541.83                     | 79.18         | 1.20E-05   | IDDEQSIIIQLQK           |
|           |              |                                                   |                  |          | 773.18            | 1544.35                     | 1542.83                     | 89.45         | 1.20E-06   | KLAEQELLDVTER           |
|           |              |                                                   |                  |          | 778.74            | 1555.46                     | 1553.85                     | 77.67         | 1.70E-05   | RNALLQAELEELR           |
|           |              |                                                   |                  |          | 779.46            | 1556.90                     | 1556.79                     | 66.68         | 0.00021    | LLGSLDIDHQQYR           |
|           |              |                                                   |                  |          | 802.72            | 1603.42                     | 1602.78                     | 73.08         | 5.00E-05   | SNDDLKENTAIVER          |
|           |              |                                                   |                  |          | 806.41            | 1610.80                     | 1610.75                     | 87.04         | 1.90E-06   | AAEESQANVHLGK           |
|           |              |                                                   |                  |          | 810.75            | 1619.49                     | 1620.72                     | 57.80         | 0.0016     | LEDEEEMNAELTAK          |
|           |              |                                                   |                  |          | 816.81            | 1631.60                     | 1631.78                     | 96.03         | 2.60E-07   | LEEAGGATAAQIEMNK        |
| 825.24    | 1648.47      | 1645.82                                           | 53.20            | 0.0049   | NLTEEMAALDDIIAK   |                             |                             |               |            |                         |
| 843.71    | 1685.41      | 1684.83                                           | 67.36            | 0.00018  | LELDDVASSMEHIVK   |                             |                             |               |            |                         |
| 845.72    | 1689.42      | 1688.88                                           | 91.16            | 7.80E-07 | GQNVQQVNYAIGALSK  |                             |                             |               |            |                         |
| 1713.93   | 1712.92      | 1711.91                                           | 50.75            | 0.0079   | ILNPAAIPEGQFIDSK  |                             |                             |               |            |                         |
| 860.59    | 1719.16      | 1717.85                                           | 95.23            | 3.00E-07 | NEDPLNETVVGLYQK   |                             |                             |               |            |                         |
| 862.60    | 1723.18      | 1721.94                                           | 75.88            | 2.50E-05 | VQLLHSQNTSLINQK   |                             |                             |               |            |                         |
| 895.49    | 1788.97      | 1786.87                                           | 93.20            | 4.70E-07 | TIDTLQSALESETHSR  |                             |                             |               |            |                         |
| 897.20    | 1792.39      | 1790.76                                           | 52.36            | 0.0056   | QREEQAEADGTEDADK  |                             |                             |               |            |                         |
| 931.62    | 1861.22      | 1858.88                                           | 99.10            | 1.10E-07 | LEQQVDDLEGSLEQEK  |                             |                             |               |            |                         |
| 934.83    | 1867.65      | 1867.93                                           | 118.48           | 1.30E-09 | DLEEATLQHEATAATLR |                             |                             |               |            |                         |
| 943.56    | 1885.10      | 1884.92                                           | 73.56            | 3.90E-05 | QADSVaelgeQIDNLQR |                             |                             |               |            |                         |

|   |              |                                                         |      |         |         |         |         |          |                                  |
|---|--------------|---------------------------------------------------------|------|---------|---------|---------|---------|----------|----------------------------------|
|   |              |                                                         |      | 979.93  | 1957.84 | 1957.98 | 122.26  | 5.20E-10 | ILQEEISDLTEQLGEGGK               |
|   |              |                                                         |      | 995.29  | 1988.57 | 1986.97 | 72.80   | 4.40E-05 | LEQQVDDLEGSLEQEKK                |
|   |              |                                                         |      | 1021.70 | 2041.38 | 2040.98 | 102.96  | 4.40E-08 | LLSNLFANYAGADSATGDGGK            |
|   |              |                                                         |      | 1044.21 | 2086.41 | 2086.04 | 81.55   | 5.80E-06 | VKLEQQVDDLEGSLEQEK               |
|   |              |                                                         |      | 1069.85 | 2137.69 | 2139.00 | 132.48  | 4.70E-11 | AEIQAALAEAEGSLEHEEGK             |
|   |              |                                                         |      | 1099.79 | 2197.57 | 2197.01 | 97.21   | 1.60E-07 | ALQEAHQQTLDLQSEEDK               |
|   |              |                                                         |      | 1101.24 | 2200.46 | 2199.12 | 98.84   | 1.10E-07 | GTLEDQIIQANPALEAFGNAK            |
|   |              |                                                         |      | 1145.88 | 2289.75 | 2290.10 | 89.15   | 9.60E-07 | LTQESIMDLENDKQQLEEK              |
|   |              |                                                         |      | 1241.45 | 2480.89 | 2481.17 | 111.86  | 4.70E-09 | KLETDL SQFQTEVEEAVQECR           |
|   |              |                                                         |      | 1278.53 | 2555.04 | 2554.18 | 49.27   | 0.0082   | TEAPPHIYSISDNAYQYMLADR           |
| 3 | gj 74315904  | alpha globin-like [Danio rerio]                         | 67.8 | 143     | 1117.39 | 1116.38 | 1114.56 | 42.40    | 0.07 ADEIGAEALAR                 |
|   |              |                                                         |      |         | 588.76  | 1175.51 | 1175.62 | 78.14    | 1.80E-05 TIMGAVGEAISK            |
|   |              |                                                         |      |         | 684.64  | 1367.27 | 1365.73 | 80.52    | 8.50E-06 FFNNLALALSEK            |
|   |              |                                                         |      |         | 932.23  | 1862.44 | 1863.88 | 119.89   | 9.30E-10 TYFSHWSDLSPGSGPVK       |
|   |              |                                                         |      |         | 934.14  | 1866.26 | 1868.00 | 104.77   | 3.00E-08 IDDLVGGLAALSELHAFK      |
|   |              |                                                         |      |         | 934.17  | 1866.32 | 1863.88 | 96.10    | 2.20E-07 TYFSHWSDLSPGSGPVK       |
|   |              |                                                         |      |         | 934.23  | 1866.44 | 1868.00 | 116.08   | 2.20E-09 IDDLVGGLAALSELHAFK      |
|   |              |                                                         |      |         | 934.30  | 1866.58 | 1863.88 | 93.17    | 4.30E-07 TYFSHWSDLSPGSGPVK       |
|   |              |                                                         |      |         | 934.46  | 1866.90 | 1868.00 | 133.85   | 3.70E-11 IDDLVGGLAALSELHAFK      |
|   |              |                                                         |      |         | 998.22  | 1994.42 | 1991.97 | 69.02    | 0.00011 TYFSHWSDLSPGSGPVKK       |
| 4 | gj 47271417  | hemoglobin alpha adult-1 [Danio rerio]                  | 67.8 | 143     | 1117.39 | 1116.38 | 1114.56 | 42.40    | 0.07 ADEIGAEALAR                 |
|   |              |                                                         |      |         | 582.09  | 1162.17 | 1161.61 | 80.71    | 9.20E-06 TIMGAVGEAVSK            |
|   |              |                                                         |      |         | 684.64  | 1367.27 | 1365.73 | 80.52    | 8.50E-06 FFNNLALALSEK            |
|   |              |                                                         |      |         | 925.24  | 1848.46 | 1847.88 | 108.85   | 1.20E-08 TYFSHWADLSPGSGPVK       |
|   |              |                                                         |      |         | 934.46  | 1866.90 | 1868.00 | 133.85   | 3.70E-11 IDDLVGGLAALSELHAFK      |
| 5 | gj 169403947 | glyceraldehyde-3-phosphate dehydrogenase [Danio rerio]  | 63.1 | 333     | 748.67  | 1495.33 | 1494.84 | 73.96    | 3.70E-05 VPTPNVSVVDLTVR          |
|   |              |                                                         |      |         | 787.22  | 1572.42 | 1571.83 | 87.49    | 1.80E-06 LVIDGHAITVYSER          |
|   |              |                                                         |      |         | 931.70  | 1861.39 | 1860.94 | 91.36    | 6.60E-07 SSIFDAGAGIALNDHFVK      |
|   |              |                                                         |      |         | 1105.92 | 2209.83 | 2210.17 | 74.16    | 3.10E-05 LVIDGHAITVYSERDPANIK    |
|   |              |                                                         |      |         | 1117.27 | 2232.53 | 2230.08 | 109.24   | 9.40E-09 WGDAGATYVVESTGVFTTIEK   |
|   |              |                                                         |      |         | 1300.97 | 2599.93 | 2599.37 | 115.89   | 1.80E-09 VINDNFVIVEGLMSTVHAITATQ |
| 6 | gj 38488753  | myosin, heavy polypeptide 6, cardiac muscle, alpha [Dan | 47   | 1936    | 602.49  | 1202.96 | 1202.57 | 64.97    | 0.00035 DGDVHPQNPPK              |
|   |              |                                                         |      |         | 659.27  | 1316.53 | 1316.61 | 44.94    | 0.034 ELENELDAEQK                |
|   |              |                                                         |      |         | 671.85  | 1341.68 | 1341.65 | 84.88    | 3.20E-06 AFDVLGFTSEEK            |
|   |              |                                                         |      |         | 1375.67 | 1374.66 | 1374.66 | 66.79    | 0.00022 LAEQELTDATER             |
|   |              |                                                         |      |         | 702.67  | 1403.32 | 1403.72 | 76.66    | 2.20E-05 KDFEINQLNQR             |
|   |              |                                                         |      |         | 737.76  | 1473.50 | 1473.68 | 50.23    | 0.0097 IEELEEELDAER              |
|   |              |                                                         |      |         | 742.19  | 1482.37 | 1480.77 | 58.83    | 0.0012 LSSADIETYLLEK             |
|   |              |                                                         |      |         | 755.38  | 1508.74 | 1509.74 | 59.37    | 0.0011 KLQHELEEAER               |
|   |              |                                                         |      |         | 774.42  | 1546.82 | 1546.71 | 67.01    | 0.0002 SAEAAEELANANTAK           |
|   |              |                                                         |      |         | 794.15  | 1586.29 | 1585.79 | 48.54    | 0.014 IRELENELDAEQK              |
|   |              |                                                         |      |         | 795.70  | 1589.38 | 1588.75 | 98.08    | 1.50E-07 IEDEEEINADLTAK          |
|   |              |                                                         |      |         | 809.11  | 1616.20 | 1615.81 | 111.35   | 7.20E-09 LEEAGGATSAQVELNK        |
|   |              |                                                         |      |         | 846.60  | 1691.19 | 1690.81 | 85.65    | 2.70E-06 NSYEETLDHLETIK          |
|   |              |                                                         |      |         | 860.59  | 1719.16 | 1716.90 | 95.15    | 3.00E-07 NKDPLNETVVGLYQK         |
|   |              |                                                         |      |         | 1744.97 | 1743.96 | 1742.92 | 44.84    | 0.031 ILNASAIPEGQFIENK           |
|   |              |                                                         |      |         | 931.62  | 1861.22 | 1858.88 | 99.10    | 1.10E-07 LEQQVDDLEGSLEQEK        |
|   |              |                                                         |      |         | 950.87  | 1899.73 | 1899.92 | 88.36    | 1.30E-06 DLEESTLQHEATTASLR       |
|   |              |                                                         |      |         | 967.26  | 1932.50 | 1931.91 | 114.53   | 3.10E-09 NLQEEISDLTDQVSEGR       |
|   |              |                                                         |      |         | 995.29  | 1988.57 | 1986.97 | 72.80    | 4.40E-05 LEQQVDDLEGSLEQEKK       |
|   |              |                                                         |      |         | 1029.23 | 2056.45 | 2056.02 | 50.36    | 0.0076 RDLEESTLQHEATTASLR        |
|   |              |                                                         |      |         | 1044.21 | 2086.41 | 2086.04 | 81.55    | 5.80E-06 VKLEQQVDDLEGSLEQEK      |

|    |              |                                                         |      |         |         |         |         |          |                         |                         |
|----|--------------|---------------------------------------------------------|------|---------|---------|---------|---------|----------|-------------------------|-------------------------|
|    |              |                                                         |      | 1086.81 | 2171.61 | 2170.99 | 90.81   | 6.70E-07 | TELQSALEEADASVEHEEGK    |                         |
|    |              |                                                         |      | 1099.79 | 2197.57 | 2197.01 | 97.21   | 1.60E-07 | ALQEAHQQTLLDDLQSEEDK    |                         |
|    |              |                                                         |      | 1101.24 | 2200.46 | 2199.12 | 98.84   | 1.10E-07 | GTLEDQIIQANPALEAFGNAK   |                         |
|    |              |                                                         |      | 1145.86 | 2289.71 | 2289.08 | 53.91   | 0.0032   | LTQENVMDLENDKQQLEDK     |                         |
|    |              |                                                         |      | 1158.89 | 2315.76 | 2316.11 | 145.85  | 2.10E-12 | NDLLLQVQSEQDTLTDAEER    |                         |
|    |              |                                                         |      | 1278.78 | 2555.54 | 2554.29 | 56.67   | 0.0015   | KQESDLLQLQNELEELVQENR   |                         |
|    |              |                                                         |      | 1341.94 | 2681.86 | 2682.38 | 81.75   | 4.50E-06 | KKQESDLLQLQNELEELVQENR  |                         |
|    |              |                                                         |      | 1427.49 | 2852.97 | 2853.40 | 96.93   | 1.30E-07 | ALQEAHQQTLLDDLQSEEDKVNT |                         |
| 7  | gi 70778800  | actin, alpha, cardiac muscle [Danio rerio]              | 58.4 | 377     | 489.47  | 976.93  | 975.44  | 36.02    | 0.29                    | AGFAGDDAPR              |
|    |              |                                                         |      |         | 600.05  | 1198.08 | 1197.51 | 75.20    | 3.20E-05                | DSYVGDEAQS              |
|    |              |                                                         |      |         | 895.36  | 1788.71 | 1789.88 | 109.27   | 1.20E-08                | SYELPDGQVITIGNER        |
|    |              |                                                         |      |         | 977.68  | 1953.34 | 1955.04 | 80.29    | 7.90E-06                | VAPEEHPTLLTEAPLNPK      |
| 8  | gi 163644331 | ventricular myosin heavy chain [Danio rerio]            | 50.2 | 1938    | 1114.80 | 2227.58 | 2227.06 | 62.75    | 0.00044                 | DLYANNVLSGGTTMYPGIADR   |
|    |              |                                                         |      |         | 496.09  | 990.16  | 989.50  | 39.61    | 0.13                    | SNNFQKPR                |
|    |              |                                                         |      |         | 609.19  | 1216.37 | 1215.63 | 54.25    | 0.0044                  | AGLLGQLEEMR             |
|    |              |                                                         |      |         | 1224.67 | 1223.66 | 1223.61 | 43.14    | 0.046                   | TKYETDAIQR              |
|    |              |                                                         |      |         | 641.99  | 1281.96 | 1281.54 | 41.73    | 0.067                   | EQYEEEQEAK              |
|    |              |                                                         |      |         | 643.04  | 1284.06 | 1282.57 | 37.91    | 0.16                    | ELTYQTEEDR              |
|    |              |                                                         |      |         | 685.16  | 1368.31 | 1367.63 | 47.57    | 0.017                   | IQHELDEAEER             |
|    |              |                                                         |      |         | 748.98  | 1495.95 | 1495.73 | 61.03    | 0.00074                 | KIQHELDEAEER            |
|    |              |                                                         |      |         | 752.60  | 1503.19 | 1502.76 | 72.06    | 6.30E-05                | ENQSILITGESGAGK         |
|    |              |                                                         |      |         | 810.75  | 1619.49 | 1620.72 | 57.80    | 0.0016                  | LEDEEEMNAELTAK          |
|    |              |                                                         |      |         | 816.81  | 1631.60 | 1631.78 | 96.03    | 2.60E-07                | LEEAGGATAAQIEMNK        |
|    |              |                                                         |      |         | 825.24  | 1648.47 | 1645.82 | 53.20    | 0.0049                  | NLTEEMAALDDIIAK         |
|    |              |                                                         |      |         | 862.60  | 1723.18 | 1721.94 | 75.88    | 2.50E-05                | VQLLHSQNTSLLNQK         |
|    |              |                                                         |      |         | 931.62  | 1861.22 | 1858.88 | 99.10    | 1.10E-07                | LEQQVDDLEGSLEQEK        |
|    |              |                                                         |      |         | 934.83  | 1867.65 | 1867.93 | 118.48   | 1.30E-09                | DLEEATLQHEATAATLR       |
|    |              |                                                         |      |         | 943.56  | 1885.10 | 1884.92 | 73.56    | 3.90E-05                | QADSVaelGEQIDNLQR       |
|    |              |                                                         |      |         | 980.32  | 1958.63 | 1958.94 | 90.94    | 7.10E-07                | NLQEEISDLTEQLGEGGK      |
|    |              |                                                         |      |         | 995.29  | 1988.57 | 1986.97 | 72.80    | 4.40E-05                | LEQQVDDLEGSLEQEKK       |
|    |              |                                                         |      |         | 1094.51 | 2187.00 | 2185.00 | 73.03    | 4.20E-05                | SEIQSALEEAEASLEHEEGK    |
|    |              |                                                         |      |         | 1099.79 | 2197.57 | 2197.01 | 97.21    | 1.60E-07                | ALQEAHQQTLLDDLQSEEDK    |
|    |              |                                                         |      |         | 1101.24 | 2200.46 | 2199.12 | 98.84    | 1.10E-07                | GTLEDQIIQANPALEAFGNAK   |
|    |              |                                                         |      |         | 1165.44 | 2328.86 | 2327.21 | 37.90    | 0.13                    | KGTLEDQIIQANPALEAFGNAK  |
| 9  | gi 116325975 | ATP synthase, H+ transporting, mitochondrial F1 comple: | 58.4 | 551     | 1427.49 | 2852.97 | 2853.40 | 96.93    | 1.30E-07                | ALQEAHQQTLLDDLQSEEDKVNT |
|    |              |                                                         |      |         | 1199.65 | 1198.64 | 1196.64 | 38.38    | 0.16                    | VVDALGNPIDGK            |
|    |              |                                                         |      |         | 644.36  | 1286.71 | 1286.69 | 72.45    | 6.20E-05                | HALIYYDDLSK             |
|    |              |                                                         |      |         | 650.86  | 1299.70 | 1299.74 | 95.06    | 3.20E-07                | TAIAIDTIINQK            |
|    |              |                                                         |      |         | 682.29  | 1362.56 | 1362.69 | 80.70    | 8.60E-06                | TGTAEVSSILEEK           |
|    |              |                                                         |      |         | 766.34  | 1530.67 | 1530.75 | 131.50   | 7.20E-11                | ILGADTGAELEETGR         |
|    |              |                                                         |      |         | 1031.84 | 2061.66 | 2059.13 | 79.24    | 9.90E-06                | AFLQHVISQHQDLLAAIR      |
| 10 | gi 66472252  | slow myosin heavy chain 1 [Danio rerio]                 | 43.3 | 1938    | 1182.76 | 2363.50 | 2364.17 | 82.77    | 4.00E-06                | EVAFAQFGSDLDAAATQQLLNR  |
|    |              |                                                         |      |         | 1180.66 | 1179.65 | 1179.58 | 47.68    | 0.017                   | DFEISQLNSK              |
|    |              |                                                         |      |         | 1224.67 | 1223.66 | 1223.61 | 43.14    | 0.046                   | TKYETDAIQR              |
|    |              |                                                         |      |         | 643.04  | 1284.06 | 1282.57 | 37.91    | 0.16                    | ELTYQTEEDR              |
|    |              |                                                         |      |         | 685.16  | 1368.31 | 1367.63 | 47.57    | 0.017                   | LQHELDEAEER             |
|    |              |                                                         |      |         | 748.98  | 1495.95 | 1495.73 | 61.03    | 0.00074                 | KLQHELDEAEER            |
|    |              |                                                         |      |         | 751.13  | 1500.24 | 1499.75 | 107.00   | 2.00E-08                | LQEAEEAVEAVNAK          |
|    |              |                                                         |      |         | 816.81  | 1631.60 | 1631.78 | 96.03    | 2.60E-07                | LEEAGGATAAQIEMNK        |
|    |              |                                                         |      |         | 897.20  | 1792.39 | 1790.76 | 52.36    | 0.0056                  | QREEQAEADGTEDADK        |
|    |              |                                                         |      |         | 931.62  | 1861.22 | 1858.88 | 99.10    | 1.10E-07                | LEQQVDDLEGSLEQEK        |
|    |              |                                                         |      |         | 934.83  | 1867.65 | 1867.93 | 118.48   | 1.30E-09                | DLEEATLQHEATAATLR       |

|    |              |                                                                       |      |         |         |         |         |          |                         |                          |
|----|--------------|-----------------------------------------------------------------------|------|---------|---------|---------|---------|----------|-------------------------|--------------------------|
|    |              |                                                                       |      | 995.29  | 1988.57 | 1986.97 | 72.80   | 4.40E-05 | LEQQVDDLEGSLEQEKK       |                          |
|    |              |                                                                       |      | 1003.16 | 2004.30 | 2002.97 | 56.10   | 0.002    | NLQEEISDLTEQLGETGK      |                          |
|    |              |                                                                       |      | 1099.79 | 2197.57 | 2197.01 | 97.21   | 1.60E-07 | ALQEAHQQTLLDDLQSEEDK    |                          |
|    |              |                                                                       |      | 1101.24 | 2200.46 | 2199.12 | 98.84   | 1.10E-07 | GTLEDQIIQANPALEAFGNAK   |                          |
|    |              |                                                                       |      | 1165.44 | 2328.86 | 2327.21 | 37.90   | 0.13     | KGTLEDQIIQANPALEAFGNAK  |                          |
|    |              |                                                                       |      | 1427.49 | 2852.97 | 2853.40 | 96.93   | 1.30E-07 | ALQEAHQQTLLDDLQSEEDKVNT |                          |
| 11 | gi 55926111  | cardiac myosin light chain-1 [Danio rerio]                            | 52   | 196     | 757.17  | 1512.33 | 1511.69 | 84.44    | 3.40E-06                | DQGTDFDFVEGLR            |
|    |              |                                                                       |      |         | 780.26  | 1558.50 | 1559.82 | 92.64    | 5.50E-07                | KEEAPAPAPVPETPK          |
|    |              |                                                                       |      |         | 889.30  | 1776.58 | 1777.85 | 48.44    | 0.015                   | SVPLDFSPDQIEEFR          |
|    |              |                                                                       |      |         | 973.35  | 1944.68 | 1944.08 | 96.37    | 1.90E-07                | ALGHNPTNADVLTVLGKPK      |
|    |              |                                                                       |      |         | 790.88  | 2369.61 | 2370.23 | 93.88    | 3.20E-07                | KEEAPAPAPVPETPKPEPEVDLK  |
| 12 | gi 18858329  | ba1 globin [Danio rerio]                                              | 83.8 | 148     | 713.59  | 1425.16 | 1424.76 | 91.43    | 6.90E-07                | LNIDEIGPQALSR            |
|    |              |                                                                       |      |         | 726.37  | 1450.72 | 1449.69 | 68.09    | 0.00015                 | NTYAALSVMHSEK            |
|    |              |                                                                       |      |         | 898.52  | 1795.02 | 1794.83 | 130.34   | 8.40E-11                | FGQAGFNADVQEAWQK         |
|    |              |                                                                       |      |         | 994.50  | 1986.99 | 1984.97 | 94.14    | 3.30E-07                | YFATFGNLSSPAAIMGNPK      |
| 13 | gi 189525553 | PREDICTED: hypothetical protein LOC336197 [Danio rerio]               | 75   | 517     | 975.59  | 974.58  | 974.55  | 36.11    | 0.31                    | IGLFGGAGVGK              |
|    |              |                                                                       |      |         | 704.65  | 1407.28 | 1405.67 | 96.20    | 2.30E-07                | AHGGYSVFAGVGER           |
|    |              |                                                                       |      |         | 1436.69 | 1435.68 | 1434.75 | 46.62    | 0.022                   | FTQAGSEVSALLGR           |
|    |              |                                                                       |      |         | 720.34  | 1438.67 | 1438.78 | 103.02   | 4.80E-08                | VALTGLTVAEYFR            |
|    |              |                                                                       |      |         | 729.69  | 1457.36 | 1456.83 | 72.54    | 5.60E-05                | TVLIMELINNVAK            |
|    |              |                                                                       |      |         | 839.46  | 1676.91 | 1676.92 | 102.54   | 5.60E-08                | LVLEVAQHLGENTVR          |
|    |              |                                                                       |      |         | 961.83  | 1921.65 | 1920.96 | 84.87    | 2.80E-06                | DQEGQDVLLFIDNIFR         |
|    |              |                                                                       |      |         | 994.82  | 1987.63 | 1987.03 | 98.94    | 1.10E-07                | AIAELGIYPAVDPLDSTSR      |
|    |              |                                                                       |      |         | 1004.29 | 2006.57 | 2004.05 | 85.99    | 2.10E-06                | FLSQPFQVAEVFTGHLGK       |
|    |              |                                                                       |      |         | 687.83  | 2060.47 | 2059.99 | 39.81    | 0.087                   | EGNDLYHEMIESGVINLK       |
|    |              |                                                                       |      |         | 1330.59 | 2659.17 | 2658.38 | 122.66   | 3.80E-10                | SLQDIIAILGMDELSEEDKLTVAR |
|    |              |                                                                       |      |         | 1282.31 | 3843.90 | 3841.97 | 53.23    | 0.002                   | KGSITSVQAIYVPADDLTDPPA   |
| 14 | gi 47551317  | enolase 3, (beta, muscle) [Danio rerio]                               | 70   | 433     | 687.71  | 1373.40 | 1372.70 | 80.72    | 8.70E-06                | HITGEQLGDLYK             |
|    |              |                                                                       |      |         | 719.54  | 1437.06 | 1435.72 | 59.66    | 0.001                   | GNPTVEVDLYTTK            |
|    |              |                                                                       |      |         | 1054.07 | 2106.12 | 2104.07 | 111.53   | 6.00E-09                | FTGSVDIQVVGDDLTVTNPK     |
|    |              |                                                                       |      |         | 1060.84 | 2119.67 | 2118.12 | 102.85   | 4.30E-08                | DVILPVPFNVINGGSHAGNK     |
|    |              |                                                                       |      |         | 1013.17 | 3036.49 | 3037.61 | 62.59    | 0.00033                 | HIADLAGNKDVILPVPFNVINGC  |
| 15 | gi 18858539  | desmin [Danio rerio]                                                  | 56.7 | 473     | 773.44  | 772.43  | 772.43  | 35.04    | 0.45                    | LEAEIAK                  |
|    |              |                                                                       |      |         | 527.61  | 1053.20 | 1052.56 | 39.51    | 0.11                    | KIHEEEIR                 |
|    |              |                                                                       |      |         | 545.18  | 1088.34 | 1086.57 | 41.12    | 0.095                   | VSDLNQAVNK               |
|    |              |                                                                       |      |         | 1254.56 | 1253.55 | 1253.56 | 38.11    | 0.15                    | NISEAEDWYK               |
|    |              |                                                                       |      |         | 888.41  | 1774.80 | 1775.91 | 99.92    | 1.00E-07                | FLEQQNSALTVEIER          |
|    |              |                                                                       |      |         | 989.77  | 1977.53 | 1978.97 | 108.45   | 1.20E-08                | LDFNLADAINQDFLNTR        |
|    |              |                                                                       |      |         | 1094.31 | 2186.61 | 2186.00 | 145.27   | 2.50E-12                | TFGSGLGSSIFAGHGSSGSSGS   |
| 16 | gi 23097290  | troponin T2, cardiac [Danio rerio]                                    | 18.4 | 282     | 609.45  | 1216.89 | 1216.66 | 49.43    | 0.013                   | KEEEEEISLK               |
|    |              |                                                                       |      |         | 672.95  | 1343.88 | 1344.75 | 79.90    | 1.10E-05                | KKEEEEEISLK              |
|    |              |                                                                       |      |         | 855.86  | 1709.71 | 1710.90 | 55.88    | 0.0024                  | RKPLDIDNANESALR          |
|    |              |                                                                       |      |         | 957.92  | 1913.82 | 1913.95 | 94.24    | 3.30E-07                | DLNELQTLIEAHFESR         |
| 17 | gi 189536981 | PREDICTED: similar to slow myosin heavy chain 3 isoform [Danio rerio] | 48.2 | 1940    | 496.09  | 990.16  | 989.50  | 39.61    | 0.13                    | SNNFQKPR                 |
|    |              |                                                                       |      |         | 1182.71 | 1181.70 | 1180.57 | 49.07    | 0.012                   | DFEISQLSSR               |
|    |              |                                                                       |      |         | 1224.67 | 1223.66 | 1223.61 | 43.14    | 0.046                   | TKYETDAIQR               |
|    |              |                                                                       |      |         | 641.99  | 1281.96 | 1281.54 | 41.73    | 0.067                   | EQYEEEQEAK               |
|    |              |                                                                       |      |         | 643.04  | 1284.06 | 1282.57 | 37.91    | 0.16                    | ELTYQTEEDR               |
|    |              |                                                                       |      |         | 685.16  | 1368.31 | 1367.63 | 47.57    | 0.017                   | LQHELDEAEER              |
|    |              |                                                                       |      |         | 748.98  | 1495.95 | 1495.73 | 61.03    | 0.00074                 | KLQHELDEAEER             |
|    |              |                                                                       |      |         | 752.60  | 1503.19 | 1502.76 | 72.06    | 6.30E-05                | ENQSILITGESGAGK          |
|    |              |                                                                       |      |         | 810.75  | 1619.49 | 1620.72 | 57.80    | 0.0016                  | LEDEEEMNAELTAK           |

|    |              |                                                         |      |         |         |         |         |          |                       |                          |
|----|--------------|---------------------------------------------------------|------|---------|---------|---------|---------|----------|-----------------------|--------------------------|
|    |              |                                                         |      | 816.81  | 1631.60 | 1631.78 | 96.03   | 2.60E-07 | LEEAGGATAAQIEMNK      |                          |
|    |              |                                                         |      | 860.59  | 1719.16 | 1716.90 | 95.15   | 3.00E-07 | NKDPLNETVVGLYQK       |                          |
|    |              |                                                         |      | 862.60  | 1723.18 | 1721.94 | 75.88   | 2.50E-05 | VQLLHSQNTSLLNQK       |                          |
|    |              |                                                         |      | 897.20  | 1792.39 | 1790.76 | 52.36   | 0.0056   | QREEQAEADGTEDADK      |                          |
|    |              |                                                         |      | 931.62  | 1861.22 | 1858.88 | 99.10   | 1.10E-07 | LEQQVDDLEGSLEQEK      |                          |
|    |              |                                                         |      | 949.82  | 1897.63 | 1895.90 | 59.47   | 0.00096  | HADSVSDLGEQIDNLQR     |                          |
|    |              |                                                         |      | 995.29  | 1988.57 | 1986.97 | 72.80   | 4.40E-05 | LEQQVDDLEGSLEQEKK     |                          |
|    |              |                                                         |      | 1099.79 | 2197.57 | 2197.01 | 97.21   | 1.60E-07 | ALQEAHQQTLDLQSEEDK    |                          |
|    |              |                                                         |      | 1427.49 | 2852.97 | 2853.40 | 96.93   | 1.30E-07 | ALQEAHQQTLDLQSEEDKVNT |                          |
| 18 | gi 189536979 | PREDICTED: similar to slow myosin heavy chain 3 isoform | 46.4 | 1934    | 496.09  | 990.16  | 989.50  | 39.61    | 0.13                  | SNNFQKPR                 |
|    |              |                                                         |      |         | 1182.71 | 1181.70 | 1180.57 | 49.07    | 0.012                 | DFEISQLSSR               |
|    |              |                                                         |      |         | 1224.67 | 1223.66 | 1223.61 | 43.14    | 0.046                 | TKYETDAIQR               |
|    |              |                                                         |      |         | 641.99  | 1281.96 | 1281.54 | 41.73    | 0.067                 | EQYEEEQEAK               |
|    |              |                                                         |      |         | 643.04  | 1284.06 | 1282.57 | 37.91    | 0.16                  | ELTYQTEEDR               |
|    |              |                                                         |      |         | 685.16  | 1368.31 | 1367.63 | 47.57    | 0.017                 | LQHELDEAEER              |
|    |              |                                                         |      |         | 748.98  | 1495.95 | 1495.73 | 61.03    | 0.00074               | KLQHELDEAEER             |
|    |              |                                                         |      |         | 752.60  | 1503.19 | 1502.76 | 72.06    | 6.30E-05              | ENQSILITGESGAGK          |
|    |              |                                                         |      |         | 810.75  | 1619.49 | 1620.72 | 57.80    | 0.0016                | LEDEEEMNAELTAK           |
|    |              |                                                         |      |         | 816.81  | 1631.60 | 1631.78 | 96.03    | 2.60E-07              | LEEAGGATAAQIEMNK         |
|    |              |                                                         |      |         | 860.59  | 1719.16 | 1716.90 | 95.15    | 3.00E-07              | NKDPLNETVVGLYQK          |
|    |              |                                                         |      |         | 862.60  | 1723.18 | 1721.94 | 75.88    | 2.50E-05              | VQLLHSQNTSLLNQK          |
|    |              |                                                         |      |         | 897.20  | 1792.39 | 1790.76 | 52.36    | 0.0056                | QREEQAEADGTEDADK         |
|    |              |                                                         |      |         | 931.62  | 1861.22 | 1858.88 | 99.10    | 1.10E-07              | LEQQVDDLEGSLEQEK         |
|    |              |                                                         |      |         | 949.82  | 1897.63 | 1895.90 | 59.47    | 0.00096               | HADSVSDLGEQIDNLQR        |
|    |              |                                                         |      |         | 995.29  | 1988.57 | 1986.97 | 72.80    | 4.40E-05              | LEQQVDDLEGSLEQEKK        |
|    |              |                                                         |      |         | 1099.79 | 2197.57 | 2197.01 | 97.21    | 1.60E-07              | ALQEAHQQTLDLQSEEDK       |
|    |              |                                                         |      |         | 1427.49 | 2852.97 | 2853.40 | 96.93    | 1.30E-07              | ALQEAHQQTLDLQSEEDKVNT    |
| 19 | gi 83025080  | actinin, alpha 2 [Danio rerio]                          | 42.3 | 895     | 671.13  | 1340.24 | 1338.79 | 55.24    | 0.0029                | QAILGIQQEVLK             |
|    |              |                                                         |      |         | 826.12  | 1650.22 | 1648.81 | 71.27    | 7.40E-05              | KAGTQIENIEEDFR           |
|    |              |                                                         |      |         | 842.75  | 1683.49 | 1680.90 | 72.26    | 5.60E-05              | LLETVDQLFLEYAK           |
|    |              |                                                         |      |         | 860.29  | 1718.57 | 1715.95 | 46.08    | 0.024                 | ILAADKPYILSDELK          |
|    |              |                                                         |      |         | 873.76  | 1745.51 | 1743.87 | 73.20    | 4.60E-05              | DDPLGNLNLAFDIAEK         |
|    |              |                                                         |      |         | 885.39  | 1768.76 | 1768.81 | 108.07   | 1.40E-08              | KHEAFESDLSAHQDR          |
|    |              |                                                         |      |         | 916.62  | 1831.23 | 1828.89 | 71.45    | 6.70E-05              | MLDAEDILSTPKPDER         |
|    |              |                                                         |      |         | 969.28  | 1936.54 | 1934.98 | 74.47    | 3.10E-05              | GDLTNPYSTITAEIIAIK       |
|    |              |                                                         |      |         | 1000.26 | 1998.50 | 1998.01 | 57.54    | 0.0015                | LEGDHQLIQESLIFDNK        |
|    |              |                                                         |      |         | 1050.91 | 2099.81 | 2099.09 | 86.17    | 2.00E-06              | LNKDDPLGNLNLAFDIAEK      |
|    |              |                                                         |      |         | 1412.81 | 2823.60 | 2824.40 | 93.56    | 2.80E-07              | VEQIAAIAQELNELDYHDTVASVN |
| 20 | gi 66773080  | ATP synthase, H+ transporting, mitochondrial F1 complex | 69.8 | 517     | 975.59  | 974.58  | 974.55  | 36.11    | 0.31                  | IGLFGGAGVVK              |
|    |              |                                                         |      |         | 704.65  | 1407.28 | 1405.67 | 96.20    | 2.30E-07              | AHGGYSVFAGVGER           |
|    |              |                                                         |      |         | 1436.69 | 1435.68 | 1434.75 | 46.62    | 0.022                 | FTQAGSEVSALLGR           |
|    |              |                                                         |      |         | 720.34  | 1438.67 | 1438.78 | 103.02   | 4.80E-08              | VALTGLTVAEYFR            |
|    |              |                                                         |      |         | 729.69  | 1457.36 | 1456.83 | 72.54    | 5.60E-05              | TVLIMELINNVAK            |
|    |              |                                                         |      |         | 839.46  | 1676.91 | 1676.92 | 102.54   | 5.60E-08              | LVLEVAQHLGENTVR          |
|    |              |                                                         |      |         | 961.83  | 1921.65 | 1920.96 | 84.87    | 2.80E-06              | DQEGQDVLLFIDNIFR         |
|    |              |                                                         |      |         | 994.82  | 1987.63 | 1987.03 | 98.94    | 1.10E-07              | AIAELGIYPAVDPLDSTSR      |
|    |              |                                                         |      |         | 1004.29 | 2006.57 | 2004.05 | 85.99    | 2.10E-06              | FLSQPFQVAEVFTGHLGK       |
|    |              |                                                         |      |         | 687.83  | 2060.47 | 2059.99 | 39.81    | 0.087                 | EGNDLYHEMIESGVINLK       |
|    |              |                                                         |      |         | 1282.31 | 3843.90 | 3841.97 | 53.23    | 0.002                 | KGSITSVQAIYVPADLTDPPAPA  |
| 21 | gi 29725603  | myosin, light polypeptide 7, regulatory [Danio rerio]   | 87.2 | 172     | 1274.59 | 1273.58 | 1273.67 | 40.26    | 0.1                   | LFDPNATGVVVK             |
|    |              |                                                         |      |         | 842.26  | 1682.51 | 1681.91 | 98.27    | 1.40E-07              | GPINFTVFLTLFGEK          |
|    |              |                                                         |      |         | 897.81  | 1793.60 | 1792.84 | 50.73    | 0.0079                | LNVSDEELESMLTEGK         |

|    |              |                                                         |      |       |         |         |         |        |          |                          |
|----|--------------|---------------------------------------------------------|------|-------|---------|---------|---------|--------|----------|--------------------------|
| 22 | gi 189520343 | PREDICTED: similar to myosin heavy chain fast skeletal  | 40.8 | 1933  | 1047.20 | 2092.38 | 2091.96 | 104.81 | 2.80E-08 | GSSNVFSMFEQSQIQEFK       |
|    |              |                                                         |      |       | 1292.50 | 2582.99 | 2582.25 | 108.90 | 8.90E-09 | FTAEEDVQAFVAPIDVAGNIDY   |
|    |              |                                                         |      |       | 1224.67 | 1223.66 | 1223.61 | 43.14  | 0.046    | TKYETDAIQR               |
|    |              |                                                         |      |       | 641.99  | 1281.96 | 1281.54 | 41.73  | 0.067    | EQYEEEQEAK               |
|    |              |                                                         |      |       | 752.60  | 1503.19 | 1502.76 | 72.06  | 6.30E-05 | ENQSILITGESGAGK          |
|    |              |                                                         |      |       | 846.60  | 1691.19 | 1690.81 | 85.65  | 2.70E-06 | NSYEETLDHLETLK           |
|    |              |                                                         |      |       | 931.62  | 1861.22 | 1858.88 | 99.10  | 1.10E-07 | LEQQVDDLEGSLEQEK         |
|    |              |                                                         |      |       | 943.56  | 1885.10 | 1884.92 | 73.56  | 3.90E-05 | QADSVaelGEQIDNLQR        |
|    |              |                                                         |      |       | 995.29  | 1988.57 | 1986.97 | 72.80  | 4.40E-05 | LEQQVDDLEGSLEQEKK        |
|    |              |                                                         |      |       | 1010.39 | 2018.76 | 2016.00 | 68.23  | 0.00013  | NLQQEITDLTEQLGETGK       |
| 23 | gi 189537429 | PREDICTED: hypothetical protein [Danio rerio]           | 67.9 | 377   | 1108.55 | 2215.08 | 2213.03 | 110.50 | 7.20E-09 | SEIQAALeEAeATLeHEESK     |
|    |              |                                                         |      |       | 489.47  | 976.93  | 975.44  | 36.02  | 0.29     | AGFAGDDAPR               |
|    |              |                                                         |      |       | 600.05  | 1198.08 | 1197.51 | 75.20  | 3.20E-05 | DSYVGDEAQSK              |
|    |              |                                                         |      |       | 895.36  | 1788.71 | 1789.88 | 109.27 | 1.20E-08 | SYELPDGQVITIGNER         |
| 24 | gi 50344802  | hypothetical protein LOC415164 [Danio rerio]            | 68.7 | 377   | 1954.17 | 1953.16 | 1953.06 | 81.42  | 6.10E-06 | VAPeEHpVLLTeAPLNPK       |
|    |              |                                                         |      |       | 489.47  | 976.93  | 975.44  | 36.02  | 0.29     | AGFAGDDAPR               |
|    |              |                                                         |      |       | 600.05  | 1198.08 | 1197.51 | 75.20  | 3.20E-05 | DSYVGDEAQSK              |
|    |              |                                                         |      |       | 895.36  | 1788.71 | 1789.88 | 109.27 | 1.20E-08 | SYELPDGQVITIGNER         |
| 25 | gi 189540220 | PREDICTED: hypothetical protein LOC393472 [Danio rerio] | 35.1 | 1937  | 1954.17 | 1953.16 | 1953.06 | 81.42  | 6.10E-06 | VAPeEHpVLLTeAPLNPK       |
|    |              |                                                         |      |       | 1224.67 | 1223.66 | 1223.61 | 43.14  | 0.046    | TKYETDAIQR               |
|    |              |                                                         |      |       | 752.60  | 1503.19 | 1502.76 | 72.06  | 6.30E-05 | ENQSILITGESGAGK          |
|    |              |                                                         |      |       | 816.81  | 1631.60 | 1631.78 | 96.03  | 2.60E-07 | LEEAGGATAAQIEMNK         |
|    |              |                                                         |      |       | 931.62  | 1861.22 | 1858.88 | 99.10  | 1.10E-07 | LEQQVDDLEGSLEQEK         |
|    |              |                                                         |      |       | 943.56  | 1885.10 | 1884.92 | 73.56  | 3.90E-05 | QADSVaelGEQIDNLQR        |
|    |              |                                                         |      |       | 995.29  | 1988.57 | 1986.97 | 72.80  | 4.40E-05 | LEQQVDDLEGSLEQEKK        |
| 26 | gi 18858961  | lactate dehydrogenase B4 [Danio rerio]                  | 78.7 | 334   | 1003.16 | 2004.30 | 2001.99 | 56.30  | 0.002    | NLQQEISDLTEQLGETGK       |
|    |              |                                                         |      |       | 710.69  | 1419.36 | 1417.79 | 76.48  | 2.30E-05 | LITPLASGPAEPPR           |
|    |              |                                                         |      |       | 770.19  | 1538.36 | 1537.77 | 74.86  | 3.10E-05 | IVADKDYSVTANSR           |
|    |              |                                                         |      |       | 843.74  | 1685.46 | 1684.85 | 114.34 | 3.60E-09 | ELADELALVDVVEDR          |
| 27 | gi 18858335  | bactin1 [Danio rerio]                                   | 62.1 | 375   | 489.47  | 976.93  | 975.44  | 36.02  | 0.29     | AGFAGDDAPR               |
|    |              |                                                         |      |       | 600.05  | 1198.08 | 1197.51 | 75.20  | 3.20E-05 | DSYVGDEAQSK              |
|    |              |                                                         |      |       | 895.36  | 1788.71 | 1789.88 | 109.27 | 1.20E-08 | SYELPDGQVITIGNER         |
| 28 | gi 38707983  | aconitase 2, mitochondrial [Danio rerio]                | 54.3 | 782   | 786.18  | 1570.35 | 1568.82 | 59.32  | 0.0012   | FKLEPPTGDELPAR           |
|    |              |                                                         |      |       | 1695.68 | 1694.67 | 1694.78 | 51.72  | 0.0066   | FNPETDYLTAPNGEK          |
|    |              |                                                         |      |       | 857.83  | 1713.65 | 1711.84 | 77.20  | 1.80E-05 | EVNQEVYSFLASAGAK         |
|    |              |                                                         |      |       | 878.27  | 1754.52 | 1752.88 | 68.60  | 0.00013  | IVYGHLLDDPAGQEIAR        |
|    |              |                                                         |      |       | 954.55  | 1907.08 | 1905.98 | 68.05  | 0.00014  | KQGLLPLTFSNPADYDK        |
|    |              |                                                         |      |       | 1041.84 | 2081.67 | 2080.94 | 61.45  | 0.00059  | NNISWVVVGDenYGEGSSR      |
|    |              |                                                         |      |       | 1106.24 | 2210.46 | 2209.04 | 53.72  | 0.0034   | KNNISWVVVGDenYGEGSSR     |
|    |              |                                                         |      |       | 1267.35 | 2532.69 | 2532.29 | 120.88 | 5.90E-10 | GHLdNISnLLIGAVNIeNDGVN   |
|    |              |                                                         |      |       | 1361.62 | 2721.22 | 2721.43 | 65.92  | 0.00017  | NDANPATHAFVTSPEIVTALAIAc |
|    |              |                                                         |      |       | 1178.33 | 3531.95 | 3531.63 | 40.47  | 0.044    | HTDGSSETIeLNHTFNeTQIEWF  |
| 29 | gi 189523699 | PREDICTED: titin a [Danio rerio]                        | 49.5 | 32757 | 622.64  | 1243.26 | 1243.73 | 45.32  | 0.033    | KPKPPVQEPK               |
|    |              |                                                         |      |       | 804.70  | 1607.39 | 1605.88 | 52.60  | 0.0054   | AEDPLFLPSPPAKPK          |
|    |              |                                                         |      |       | 831.24  | 1660.46 | 1658.82 | 50.71  | 0.0084   | VNVEVEYTEPVER            |
|    |              |                                                         |      |       | 863.58  | 1725.14 | 1722.92 | 52.16  | 0.0057   | AGSDLVLDAAVGGKPEPK       |
|    |              |                                                         |      |       | 947.83  | 1893.64 | 1892.90 | 52.96  | 0.0043   | HTVTLsWEKPDHDGGSK        |
|    |              |                                                         |      |       | 968.75  | 1935.49 | 1936.07 | 49.40  | 0.0099   | AVNEAGASRPSVTAGPIVIK     |
|    |              |                                                         |      |       | 1015.88 | 2029.75 | 2029.15 | 63.89  | 0.00033  | KVPAKPVEAITVPTeEPPK      |
|    |              |                                                         |      |       | 1029.07 | 2056.13 | 2056.09 | 70.98  | 6.60E-05 | ELPISFVTPLADVHVYEK       |
|    |              |                                                         |      |       | 1035.13 | 2068.25 | 2067.07 | 47.02  | 0.017    | NKFDVPDAPQNVIVGNVnK      |
|    |              |                                                         |      |       | 1049.90 | 2097.79 | 2095.07 | 51.75  | 0.0057   | LQGEVLSPSPDVeIIEDGAK     |

|    |              |                                                            |      |         |         |         |         |          |                          |                          |
|----|--------------|------------------------------------------------------------|------|---------|---------|---------|---------|----------|--------------------------|--------------------------|
|    |              |                                                            |      | 1052.35 | 2102.69 | 2102.05 | 79.10   | 1.10E-05 | EQVTHQAALLQSHEVQER       |                          |
|    |              |                                                            |      | 1058.69 | 2115.37 | 2113.11 | 54.55   | 0.003    | VLAENEHGIGLPAETPEPLK     |                          |
|    |              |                                                            |      | 708.80  | 2123.37 | 2122.13 | 68.98   | 0.0001   | VLDRPGPSSGPLDITGLTAEK    |                          |
|    |              |                                                            |      | 1070.08 | 2138.14 | 2137.14 | 45.22   | 0.025    | EQHKPVVLSVNETTQTLSK      |                          |
|    |              |                                                            |      | 1079.92 | 2157.82 | 2157.24 | 49.64   | 0.0092   | KVPAKPVEAITVPTEEPPKK     |                          |
|    |              |                                                            |      | 1098.94 | 2195.87 | 2196.14 | 55.19   | 0.0025   | VLDRPGPPDGPISYIGVTSEK    |                          |
|    |              |                                                            |      | 1101.80 | 2201.58 | 2199.25 | 68.20   | 0.00013  | KLPAKPDETIAPVPIEPPKK     |                          |
|    |              |                                                            |      | 1140.29 | 2278.57 | 2276.23 | 39.60   | 0.088    | VKEPPSIIEKPESQDVIPGSK    |                          |
|    |              |                                                            |      | 1177.07 | 2352.13 | 2351.12 | 38.63   | 0.1      | VSWRPPSDDGGSDIFGYIVER    |                          |
|    |              |                                                            |      | 1224.99 | 2447.97 | 2447.27 | 40.79   | 0.062    | VNDAENLHPSTVFTIPNLPELK   |                          |
|    |              |                                                            |      | 1299.87 | 2597.72 | 2597.14 | 69.48   | 7.90E-05 | EKEVEEPEEPEEEYHPSLNER    |                          |
|    |              |                                                            |      | 1072.88 | 3215.61 | 3213.65 | 67.41   | 0.0001   | SHAIDSAPIVAQYPFTPPGPPTS  |                          |
|    |              |                                                            |      | 1108.51 | 3322.51 | 3321.81 | 37.42   | 0.099    | YTITATNNIGTVTEEVAIILDKPG |                          |
| 30 | gj 66472732  | myosin heavy chain 4 [Danio rerio]                         | 43.9 | 1935    | 1224.67 | 1223.66 | 1223.61 | 43.14    | 0.046                    | TKYETDAIQR               |
|    |              |                                                            |      |         | 816.81  | 1631.60 | 1631.78 | 96.03    | 2.60E-07                 | LEEAGGATAAQIEMNK         |
|    |              |                                                            |      |         | 931.62  | 1861.22 | 1858.88 | 99.10    | 1.10E-07                 | LEQQVDDLEGSLEQEK         |
|    |              |                                                            |      |         | 943.56  | 1885.10 | 1884.92 | 73.56    | 3.90E-05                 | QADSV AELGEQIDNLQR       |
|    |              |                                                            |      |         | 995.29  | 1988.57 | 1986.97 | 72.80    | 4.40E-05                 | LEQQVDDLEGSLEQEKK        |
|    |              |                                                            |      |         | 1003.16 | 2004.30 | 2001.99 | 56.30    | 0.002                    | NLQQEISDLTEQIGETGK       |
|    |              |                                                            |      |         | 1044.21 | 2086.41 | 2088.02 | 74.04    | 3.30E-05                 | TKLEQQVDDLEGSLEQEK       |
|    |              |                                                            |      |         | 1087.82 | 2173.62 | 2173.01 | 88.30    | 1.20E-06                 | NDLQLAVASEAENLSDAEER     |
|    |              |                                                            |      |         | 738.94  | 2213.78 | 2213.03 | 41.26    | 0.061                    | AEIQTAL EEAEGTLEHEESK    |
| 31 | gj 189519129 | PREDICTED: similar to myosin heavy chain 4 [Danio rerio]   | 41   | 1933    | 1224.67 | 1223.66 | 1223.61 | 43.14    | 0.046                    | TKYETDAIQR               |
|    |              |                                                            |      |         | 816.81  | 1631.60 | 1631.78 | 96.03    | 2.60E-07                 | LEEAGGATAAQIEMNK         |
|    |              |                                                            |      |         | 931.62  | 1861.22 | 1858.88 | 99.10    | 1.10E-07                 | LEQQVDDLEGSLEQEK         |
|    |              |                                                            |      |         | 943.56  | 1885.10 | 1884.92 | 73.56    | 3.90E-05                 | QADSV AELGEQIDNLQR       |
|    |              |                                                            |      |         | 995.29  | 1988.57 | 1986.97 | 72.80    | 4.40E-05                 | LEQQVDDLEGSLEQEKK        |
|    |              |                                                            |      |         | 1003.16 | 2004.30 | 2001.99 | 56.30    | 0.002                    | NLQQEISDLTEQIGETGK       |
|    |              |                                                            |      |         | 1044.21 | 2086.41 | 2088.02 | 74.04    | 3.30E-05                 | TKLEQQVDDLEGSLEQEK       |
|    |              |                                                            |      |         | 1087.82 | 2173.62 | 2173.01 | 88.30    | 1.20E-06                 | NDLQLAVASEAENLSDAEER     |
|    |              |                                                            |      |         | 738.94  | 2213.78 | 2213.03 | 41.26    | 0.061                    | AEIQTAL EEAEGTLEHEESK    |
| 32 | gj 148596963 | spectrin alpha 2 [Danio rerio]                             | 43.8 | 2480    | 787.22  | 1572.42 | 1571.78 | 80.51    | 9.20E-06                 | HQALQAEISGHEPR           |
|    |              |                                                            |      |         | 567.84  | 1700.48 | 1699.88 | 49.54    | 0.01                     | KHQALQAEISGHEPR          |
|    |              |                                                            |      |         | 869.56  | 1737.10 | 1736.82 | 56.93    | 0.0019                   | TATDEAYKDPSNLQ GK        |
|    |              |                                                            |      |         | 873.61  | 1745.21 | 1744.82 | 38.53    | 0.14                     | LSDDNTIGQEEIQQR          |
|    |              |                                                            |      |         | 926.15  | 1850.29 | 1848.86 | 74.98    | 2.80E-05                 | KFE EFQTDLAAHEER         |
|    |              |                                                            |      |         | 964.07  | 1926.13 | 1924.90 | 93.25    | 4.10E-07                 | SSLSSAEADFSQLAELDR       |
|    |              |                                                            |      |         | 698.23  | 2091.67 | 2091.08 | 70.44    | 7.60E-05                 | LEAELGAHEPAIQSVLETGK     |
|    |              |                                                            |      |         | 1077.98 | 2153.95 | 2153.10 | 123.55   | 3.70E-10                 | ALINADELANDVAGAEALLDR    |
|    |              |                                                            |      |         | 1109.34 | 2216.67 | 2215.12 | 36.12    | 0.2                      | RDELITNWEQIQT LATER      |
|    |              |                                                            |      |         | 1110.83 | 2219.64 | 2219.03 | 45.13    | 0.025                    | STDEAGQALLNTGHYASEEVK    |
|    |              |                                                            |      |         | 750.39  | 2248.15 | 2247.19 | 67.14    | 0.00016                  | RLEAELGAHEPAIQSVLETGK    |
|    |              |                                                            |      |         | 831.34  | 2490.98 | 2489.22 | 39.47    | 0.081                    | EKEPIV GSPDYGKDEDSAEALLI |
| 33 | gj 169259784 | myosin, heavy polypeptide 1, skeletal muscle [Danio rerio] | 37.4 | 1937    | 1224.67 | 1223.66 | 1223.61 | 43.14    | 0.046                    | TKYETDAIQR               |
|    |              |                                                            |      |         | 816.81  | 1631.60 | 1631.78 | 96.03    | 2.60E-07                 | LEEAGGATAAQIEMNK         |
|    |              |                                                            |      |         | 931.62  | 1861.22 | 1858.88 | 99.10    | 1.10E-07                 | LEQQVDDLEGSLEQEK         |
|    |              |                                                            |      |         | 943.56  | 1885.10 | 1884.92 | 73.56    | 3.90E-05                 | QADSV AELGEQIDNLQR       |
|    |              |                                                            |      |         | 995.29  | 1988.57 | 1986.97 | 72.80    | 4.40E-05                 | LEQQVDDLEGSLEQEKK        |
|    |              |                                                            |      |         | 1003.16 | 2004.30 | 2001.99 | 56.30    | 0.002                    | NLQQEISDLTEQLGETGK       |
|    |              |                                                            |      |         | 1044.21 | 2086.41 | 2088.02 | 74.04    | 3.30E-05                 | TKLEQQVDDLEGSLEQEK       |
|    |              |                                                            |      |         | 738.94  | 2213.78 | 2213.03 | 41.26    | 0.061                    | AEIQTAL EEAEGTLEHEESK    |
| 34 | gj 18858427  | creatine kinase, muscle a [Danio rerio]                    | 26.2 | 381     | 754.73  | 1507.44 | 1506.70 | 57.40    | 0.0017                   | GGDDLDPNYVLSSR           |

|    |              |                                                                 |      |       |         |         |         |        |          |                          |
|----|--------------|-----------------------------------------------------------------|------|-------|---------|---------|---------|--------|----------|--------------------------|
| 35 | gi 189540216 | PREDICTED: wu:fd14a01 [Danio rerio]                             | 38   | 1936  | 999.17  | 1996.33 | 1993.93 | 107.13 | 1.60E-08 | GTGGVDTASVGGVFDISNADR    |
|    |              |                                                                 |      |       | 1224.67 | 1223.66 | 1223.61 | 43.14  | 0.046    | TKYETDAIQR               |
|    |              |                                                                 |      |       | 816.81  | 1631.60 | 1631.78 | 96.03  | 2.60E-07 | LEEAGGATAAQIEMNK         |
|    |              |                                                                 |      |       | 931.62  | 1861.22 | 1858.88 | 99.10  | 1.10E-07 | LEQQVDDLEGSLEQEK         |
|    |              |                                                                 |      |       | 943.56  | 1885.10 | 1884.92 | 73.56  | 3.90E-05 | QADSVAEELGEQIDNLQR       |
|    |              |                                                                 |      |       | 995.29  | 1988.57 | 1986.97 | 72.80  | 4.40E-05 | LEQQVDDLEGSLEQEKK        |
| 36 | gi 189523697 | PREDICTED: im:6911926 [Danio rerio]                             | 51.2 | 28836 | 1003.16 | 2004.30 | 2001.99 | 56.30  | 0.002    | NLQQEISDLTEQLGETGK       |
|    |              |                                                                 |      |       | 671.64  | 1341.26 | 1340.73 | 47.09  | 0.019    | VTEHTVTGLLSGK            |
|    |              |                                                                 |      |       | 700.80  | 1399.58 | 1399.71 | 67.53  | 0.00017  | HVSVEALDFIDR             |
|    |              |                                                                 |      |       | 710.47  | 1418.92 | 1418.74 | 37.16  | 0.2      | FGLGEALESEIVR            |
|    |              |                                                                 |      |       | 808.51  | 1615.01 | 1612.87 | 52.28  | 0.0058   | ALDPVFKPGPPHNP           |
|    |              |                                                                 |      |       | 830.81  | 1659.61 | 1660.95 | 47.43  | 0.018    | VILSKPDEPQGP             |
|    |              |                                                                 |      |       | 856.20  | 1710.38 | 1709.82 | 61.51  | 0.00064  | ADSGNYTITIQNAAGSK        |
|    |              |                                                                 |      |       | 863.58  | 1725.14 | 1722.92 | 52.16  | 0.0057   | AGSDLVLDAAVGGKPEPK       |
|    |              |                                                                 |      |       | 885.45  | 1768.89 | 1768.91 | 37.29  | 0.17     | SSVTLTWVKAHDGGSK         |
|    |              |                                                                 |      |       | 920.85  | 1839.68 | 1838.93 | 50.02  | 0.0089   | STVSLAWKPLHDGGS          |
|    |              |                                                                 |      |       | 924.84  | 1847.66 | 1845.01 | 54.27  | 0.0034   | VQILDKPGPPAGHIEFK        |
|    |              |                                                                 |      |       | 929.14  | 1856.27 | 1854.92 | 68.20  | 0.00013  | TSVSLWEKPIHDGGS          |
|    |              |                                                                 |      |       | 951.67  | 1901.33 | 1898.91 | 43.42  | 0.039    | TTVTLWEKPEHDGGS          |
|    |              |                                                                 |      |       | 648.76  | 1943.24 | 1941.02 | 43.23  | 0.04     | IGESFEIDVPISGRPTPK       |
|    |              |                                                                 |      |       | 989.31  | 1976.60 | 1976.14 | 42.13  | 0.052    | SQLERPGAPLKPVSGITK       |
| 37 | gi 47085883  | hypothetical protein LOC406405 [Danio rerio]                    | 93.2 | 337   | 1013.79 | 2025.56 | 2025.09 | 38.16  | 0.13     | ITIDTKPGHSTLSIANTR       |
|    |              |                                                                 |      |       | 1040.51 | 2079.00 | 2077.08 | 49.15  | 0.01     | HGTGEAFINLDVIDVGPVK      |
|    |              |                                                                 |      |       | 1045.73 | 2089.44 | 2089.14 | 70.70  | 7.20E-05 | DATIEITLTKPGPPTGPVR      |
|    |              |                                                                 |      |       | 1047.74 | 2093.46 | 2092.96 | 51.97  | 0.0054   | WTEPDSGGSPITNYVVEK       |
|    |              |                                                                 |      |       | 1112.56 | 2223.10 | 2222.18 | 41.11  | 0.064    | VTAENEIGTGDPVPSKPILAK    |
|    |              |                                                                 |      |       | 1146.20 | 2290.39 | 2289.16 | 55.90  | 0.002    | KGEWVAVTTDEIHQTVYSVK     |
|    |              |                                                                 |      |       | 1152.84 | 2303.67 | 2302.28 | 45.00  | 0.025    | SEPKPLAAPVIANDLTIEPSLK   |
|    |              |                                                                 |      |       | 884.78  | 2651.30 | 2651.51 | 60.57  | 0.0006   | KKPTLPATILTKPQSLTVSEGES' |
|    |              |                                                                 |      |       | 661.18  | 1320.35 | 1319.67 | 78.24  | 1.50E-05 | GYIGADQLGDALK            |
|    |              |                                                                 |      |       | 753.50  | 1504.98 | 1502.77 | 81.33  | 7.40E-06 | VEFPADQLSALTGR           |
| 38 | gi 41054601  | voltage-dependent anion channel 2 [Danio rerio]                 | 63.6 | 283   | 1545.20 | 3088.39 | 3088.58 | 91.67  | 4.00E-07 | NSPLVSELSLFDIAHTPGVAADL  |
|    |              |                                                                 |      |       | 588.48  | 1174.94 | 1173.56 | 62.94  | 0.00059  | SEYGLTFTEK               |
|    |              |                                                                 |      |       | 1429.74 | 1428.73 | 1427.69 | 59.35  | 0.0012   | LTFDITTFSPNTGK           |
|    |              |                                                                 |      |       | 1052.33 | 2102.65 | 2102.15 | 73.62  | 3.70E-05 | VNNTSLVGVGYTQSLRPGIK     |
| 39 | gi 41054651  | isocitrate dehydrogenase 2 (NADP+), mitochondrial [Danio rerio] | 52.1 | 449   | 1088.83 | 2175.64 | 2174.05 | 81.62  | 5.60E-06 | WNTDNTLGTEINIEDQIAK      |
|    |              |                                                                 |      |       | 1258.10 | 2514.18 | 2513.15 | 75.22  | 2.10E-05 | TGDFQLHTNVNDGSEFGGSIYG   |
|    |              |                                                                 |      |       | 578.00  | 1153.98 | 1153.57 | 40.85  | 0.086    | DIFQDIFEK                |
|    |              |                                                                 |      |       | 678.57  | 1355.13 | 1354.68 | 66.05  | 0.00024  | TIEAEEAHGTVTR            |
|    |              |                                                                 |      |       | 716.02  | 1430.02 | 1428.73 | 77.71  | 1.70E-05 | FKDIFQDIFEK              |
| 40 | gi 66792936  | tropomyosin 4 isoform 1 [Danio rerio]                           | 54.9 | 284   | 861.13  | 1720.25 | 1719.82 | 116.07 | 2.40E-09 | DQTDDQVTIDSAIATK         |
|    |              |                                                                 |      |       | 1894.09 | 1893.08 | 1891.93 | 57.87  | 0.0014   | LNEHYVNTTDFLDAIK         |
|    |              |                                                                 |      |       | 586.14  | 1170.26 | 1169.67 | 66.30  | 0.00025  | LVILEGELER               |
|    |              |                                                                 |      |       | 623.18  | 1244.35 | 1242.65 | 53.21  | 0.0056   | IQLVEEELDR               |
|    |              |                                                                 |      |       | 1298.84 | 1297.83 | 1297.76 | 53.23  | 0.0047   | KLVILEGELER              |
|    |              |                                                                 |      |       | 700.61  | 1399.21 | 1398.75 | 51.35  | 0.0072   | RIQLVEEELDR              |
|    |              |                                                                 |      |       | 709.64  | 1417.26 | 1416.75 | 48.43  | 0.015    | DAQEKLELSEKK             |
|    |              |                                                                 |      |       | 770.52  | 1539.02 | 1537.71 | 105.07 | 3.00E-08 | SIDDLEDELYAQK            |
| 41 | gi 125829449 | PREDICTED: similar to myosin heavy chain [Danio rerio]          | 35.7 | 1945  | 845.36  | 1688.70 | 1688.78 | 68.99  | 0.00013  | YSEKEDKYEEEIK            |
|    |              |                                                                 |      |       | 770.52  | 2308.54 | 2307.18 | 67.97  | 0.00013  | TVAKLEKSIDDLEDELYAQK     |
|    |              |                                                                 |      |       | 609.19  | 1216.37 | 1215.63 | 54.25  | 0.0044   | AGLLGQLEEMR              |
|    |              |                                                                 |      |       | 643.04  | 1284.06 | 1282.57 | 37.91  | 0.16     | ELTYQTEEDR               |



|    |              |                                                              |      |        |         |         |         |          |                   |                          |
|----|--------------|--------------------------------------------------------------|------|--------|---------|---------|---------|----------|-------------------|--------------------------|
|    |              |                                                              |      | 931.62 | 1861.22 | 1858.88 | 99.10   | 1.10E-07 | LEQQVDDLEGSLEQEK  |                          |
|    |              |                                                              |      | 995.29 | 1988.57 | 1986.97 | 72.80   | 4.40E-05 | LEQQVDDLEGSLEQEKK |                          |
| 42 | gi 189535893 | PREDICTED: similar to myosin heavy chain [Danio rerio]       | 35.1 | 1938   | 1224.67 | 1223.66 | 1223.61 | 43.14    | 0.046             | TKYETDAIQR               |
|    |              |                                                              |      |        | 643.04  | 1284.06 | 1282.57 | 37.91    | 0.16              | ELTYQTEEDR               |
|    |              |                                                              |      |        | 931.62  | 1861.22 | 1858.88 | 99.10    | 1.10E-07          | LEQQVDDLEGSLEQEK         |
|    |              |                                                              |      |        | 995.29  | 1988.57 | 1986.97 | 72.80    | 4.40E-05          | LEQQVDDLEGSLEQEKK        |
| 43 | gi 189517521 | PREDICTED: hypothetical protein [Danio rerio]                | 44.8 | 143    | 934.97  | 1867.93 | 1867.99 | 120.19   | 8.40E-10          | IDDLLGALSSLSLHATK        |
| 44 | gi 189529246 | PREDICTED: hypothetical protein [Danio rerio]                | 52.9 | 119    | 599.32  | 1196.62 | 1195.75 | 37.92    | 0.16              | AKLEPVVLSLK              |
|    |              |                                                              |      |        | 1050.98 | 2099.94 | 2100.09 | 88.07    | 1.30E-06          | ELTELGEQVKPHFEGIFK       |
|    |              |                                                              |      |        | 1115.07 | 2228.12 | 2228.18 | 64.05    | 0.00032           | KELTELGEQVKPHFEGIFK      |
| 45 | gi 41387136  | hypothetical protein LOC393781 [Danio rerio]                 | 74.2 | 128    | 902.23  | 1802.45 | 1801.94 | 110.64   | 8.20E-09          | YHVSETPFAISAQKPK         |
|    |              |                                                              |      |        | 915.41  | 2743.19 | 2742.29 | 43.40    | 0.03              | LFPGDVILETGEVVPDFPEDSHC  |
| 46 | gi 47086807  | acyl-Coenzyme A dehydrogenase, very long chain [Danio rerio] | 56.1 | 659    | 837.57  | 1673.13 | 1671.94 | 104.71   | 3.30E-08          | AIEQFGAVIEELLLK          |
|    |              |                                                              |      |        | 872.48  | 2614.41 | 2614.37 | 42.99    | 0.035             | AGLGSGLTLQGTVHPELNHSGE   |
| 47 | gi 41053595  | nucleoside diphosphate kinase-Z2 [Danio rerio]               | 63.4 | 153    | 550.56  | 1099.10 | 1098.53 | 38.00    | 0.18              | NLIHGS DSEK              |
|    |              |                                                              |      |        | 795.46  | 1588.90 | 1588.88 | 60.32    | 0.00091           | LVAAKFVQASEDLAK          |
|    |              |                                                              |      |        | 651.01  | 1950.01 | 1949.07 | 55.39    | 0.0024            | GFRLVAAKFVQASEDLAK       |
|    |              |                                                              |      |        | 1040.53 | 2079.05 | 2077.09 | 74.03    | 3.40E-05          | YTSSGPLLAMVWEGLNVIK      |
|    |              |                                                              |      |        | 1106.98 | 2211.95 | 2211.12 | 83.98    | 3.20E-06          | SAATEVSLWFKPEELVSYR      |
| 48 | gi 47085765  | hypothetical protein LOC406325 [Danio rerio]                 | 68.8 | 397    | 594.84  | 1187.66 | 1187.68 | 73.04    | 6.00E-05          | ITAHLVHELRL              |
|    |              |                                                              |      |        | 649.07  | 1296.12 | 1294.70 | 56.75    | 0.0021            | RTPFGTYGGVLK             |
|    |              |                                                              |      |        | 683.58  | 1365.14 | 1364.63 | 58.96    | 0.0012            | DHSATDLAEHAAK            |
|    |              |                                                              |      |        | 931.96  | 1861.91 | 1861.98 | 116.41   | 2.10E-09          | TNVNGGAI AIGHPLGASGTR    |
| 49 | gi 48762657  | enolase 1, (alpha) [Danio rerio]                             | 56.5 | 432    | 1002.93 | 3005.75 | 3006.57 | 90.40    | 5.60E-07          | HIADLAGNPDVILPVPAFNVINGC |
| 50 | gi 47271422  | triosephosphate isomerase 1b [Danio rerio]                   | 91.5 | 248    | 542.18  | 1082.34 | 1081.57 | 37.83    | 0.17              | KFFVGGNWK                |
|    |              |                                                              |      |        | 696.12  | 1390.22 | 1388.71 | 83.57    | 4.70E-06          | SIEELANTLNSAK            |
|    |              |                                                              |      |        | 1458.87 | 1457.86 | 1457.72 | 49.98    | 0.01              | HVFGESDELIGQK            |
|    |              |                                                              |      |        | 801.94  | 1601.87 | 1601.88 | 47.81    | 0.017             | VVLAYEPVWAIGTGK          |
|    |              |                                                              |      |        | 808.77  | 1615.53 | 1613.82 | 72.55    | 5.40E-05          | RHVFGESDELIGQK           |
|    |              |                                                              |      |        | 1216.87 | 2431.73 | 2431.30 | 60.01    | 0.00072           | DLDGFLVGGASLKPEFIDIINAK  |
| 51 | gi 54400442  | hypothetical protein LOC449795 [Danio rerio]                 | 73.3 | 202    | 999.09  | 2994.24 | 2996.41 | 41.19    | 0.046             | TLAAGSHA EHDGQPYCHKPCY,  |
|    |              |                                                              |      |        | 1008.14 | 3021.39 | 3023.42 | 48.04    | 0.0094            | TLNPGGHAEHDGKPYCHKPCY,   |
|    |              |                                                              |      |        | 1008.49 | 3022.44 | 3022.46 | 54.27    | 0.0022            | GVNIGGAGSYVYDTPVGDDSVF   |
|    |              |                                                              |      |        | 1008.85 | 3023.53 | 3023.42 | 54.78    | 0.002             | TLNPGGHAEHDGKPYCHKPCY,   |
| 52 | gi 148922875 | hypothetical protein LOC567716 [Danio rerio]                 | 34.1 | 331    | 969.23  | 1936.45 | 1936.93 | 114.30   | 3.20E-09          | HLTTLVDDI WYYAGDR        |
| 53 | gi 47085773  | glutamic-oxaloacetic transaminase 1, soluble [Danio rerio]   | 52   | 410    | 844.84  | 1687.67 | 1687.84 | 100.98   | 8.00E-08          | NIDYVAESIHEAVTK          |
|    |              |                                                              |      |        | 1115.18 | 2228.34 | 2226.03 | 63.50    | 0.00036           | NLFAFFDSAYQGFASGDLEK     |
| 54 | gi 38488731  | natriuretic peptide precursor A [Danio rerio]                | 77.4 | 106    | 1025.48 | 2048.94 | 2049.99 | 105.81   | 2.20E-08          | SLLQQFEEALATEEASER       |
|    |              |                                                              |      |        | 1182.83 | 2363.65 | 2362.99 | 79.64    | 8.30E-06          | DREEAAAPGEDSNPSDGFDTQI   |
| 55 | gi 156713467 | vitellogenin 7 [Danio rerio]                                 | 52.7 | 1358   | 587.59  | 1173.17 | 1172.62 | 60.66    | 0.001             | LEFEVQVGPR               |
|    |              |                                                              |      |        | 1299.73 | 1298.72 | 1298.71 | 49.73    | 0.011             | EIELTAALPSQK             |
|    |              |                                                              |      |        | 1706.13 | 1705.12 | 1705.02 | 40.57    | 0.087             | WLLDALPAVGT PVIK         |
|    |              |                                                              |      |        | 1069.54 | 2137.07 | 2135.16 | 100.74   | 7.00E-08          | ISDATAQIVEVLTHLVANNK     |
| 56 | gi 50540358  | hypothetical protein LOC436918 [Danio rerio]                 | 48.5 | 357    | 1112.08 | 2222.15 | 2220.13 | 106.28   | 1.90E-08          | NAITVEMYNELIEALELAGK     |
|    |              |                                                              |      |        | 1315.03 | 2628.05 | 2626.36 | 76.50    | 1.50E-05          | QQYVDLISSLVGAEAPAVAAQP*  |
| 57 | gi 47086523  | ictacalcin [Danio rerio]                                     | 76.8 | 95     | 697.11  | 1392.20 | 1390.73 | 104.53   | 3.60E-08          | ELLSAELGDIFGK            |
| 58 | gi 40786398  | pyruvate kinase, muscle, a [Danio rerio]                     | 41.7 | 532    | 882.38  | 1762.75 | 1763.98 | 115.54   | 2.70E-09          | KGVNLPGA AVDLPVAVSEK     |
|    |              |                                                              |      |        | 937.95  | 1873.89 | 1872.82 | 46.17    | 0.021             | MNFSHGSHEYHGETIK         |
| 59 | gi 8395615   | cytochrome c oxidase subunit II [Danio rerio]                | 16.1 | 230    | 1068.17 | 2134.32 | 2133.18 | 94.22    | 3.10E-07          | ILVSAEDVLH SWAVPSLGIK    |
| 60 | gi 54400698  | hydroxysteroid (17-beta) dehydrogenase 10 [Danio rerio]      | 94.6 | 260    | 851.87  | 1701.73 | 1702.86 | 109.48   | 1.10E-08          | HGASAVILDLPSSDGHK        |
| 61 | gi 40254659  | bactin2 [Danio rerio]                                        | 53.1 | 375    | 489.47  | 976.93  | 975.44  | 36.02    | 0.29              | AGFAGDDAPR               |
|    |              |                                                              |      |        | 600.05  | 1198.08 | 1197.51 | 75.20    | 3.20E-05          | DSYVGDEA QSK             |

|    |              |                                                                 |      |      |         |         |         |       |          |                            |
|----|--------------|-----------------------------------------------------------------|------|------|---------|---------|---------|-------|----------|----------------------------|
| 62 | gi 147906978 | hypothetical protein LOC492719 [Danio rerio]                    | 57.7 | 603  | 1954.17 | 1953.16 | 1953.06 | 81.42 | 6.10E-06 | VAPEEHPVLLTEAPLNPK         |
|    |              |                                                                 |      |      | 1379.96 | 2757.90 | 2756.52 | 38.69 | 0.09     | TLLEVVETIKPTAIGVAAIGGAFI   |
|    |              |                                                                 |      |      | 1006.36 | 3016.04 | 3013.43 | 94.02 | 2.40E-07 | HISDDIFLTTAEAISEMVTTEEHLA  |
| 63 | gi 18858587  | elongation factor 1-alpha [Danio rerio]                         | 60.4 | 462  | 530.41  | 1588.19 | 1587.87 | 51.62 | 0.0068   | THINIVVIGHVDSGK            |
|    |              |                                                                 |      |      | 1244.91 | 2487.80 | 2486.35 | 68.46 | 0.0001   | VETGVLKPGMVVTFAPANVTTE     |
|    |              |                                                                 |      |      | 973.65  | 2917.91 | 2917.55 | 69.48 | 7.00E-05 | EGNASGTTLLDALDAILPPSRPT    |
|    |              |                                                                 |      |      | 1015.61 | 3043.79 | 3045.65 | 67.12 | 0.00011  | KEGNASGTTLLDALDAILPPSRP    |
| 64 | gi 148224245 | hypothetical protein LOC793834 [Danio rerio]                    | 59.1 | 763  | 653.09  | 1304.16 | 1303.71 | 82.76 | 5.60E-06 | MLLEIITTDK                 |
|    |              |                                                                 |      |      | 804.74  | 1607.47 | 1606.81 | 72.46 | 5.50E-05 | DVNTEALEILEAYK             |
|    |              |                                                                 |      |      | 1049.90 | 2097.78 | 2095.02 | 66.49 | 0.00019  | AGVEQGPTTGYLVESQQFGK       |
|    |              |                                                                 |      |      | 1195.44 | 3583.28 | 3583.84 | 76.05 | 1.20E-05 | KLDSLTTGFGFPVGAATLADEVG    |
| 65 | gi 47086021  | aldolase a, fructose-bisphosphate, b [Danio rerio]              | 31.9 | 364  | 530.65  | 1059.29 | 1058.57 | 51.67 | 0.0086   | KELSDIAQR                  |
|    |              |                                                                 |      |      | 568.04  | 1134.06 | 1132.66 | 42.00 | 0.07     | LFSQLIKER                  |
|    |              |                                                                 |      |      | 660.09  | 1318.16 | 1317.68 | 91.48 | 7.50E-07 | GILAADESTGSAK              |
|    |              |                                                                 |      |      | 876.65  | 1751.28 | 1749.80 | 94.12 | 3.70E-07 | GDTGAAAGESLFFVANHAY        |
|    |              |                                                                 |      |      | 1174.96 | 2347.90 | 2347.17 | 50.36 | 0.007    | GVVPLAGTNGETTTQGLDGLYE     |
| 66 | gi 157426949 | hydroxyacyl-Coenzyme A dehydrogenase/3-ketoacyl-CoA             | 68.5 | 761  | 653.09  | 1304.16 | 1303.71 | 82.76 | 5.60E-06 | MLLEIITTDK                 |
|    |              |                                                                 |      |      | 698.19  | 1394.36 | 1392.67 | 54.97 | 0.0032   | LSGQLDYHGFEK               |
|    |              |                                                                 |      |      | 837.73  | 1673.45 | 1672.93 | 67.82 | 0.00016  | MGLVHQLVDPLGPKL            |
|    |              |                                                                 |      |      | 1167.77 | 3500.29 | 3497.79 | 58.92 | 0.00062  | LDSLTTGFGFPVGLATLADEVGI    |
|    |              |                                                                 |      |      | 1210.60 | 3628.77 | 3625.89 | 38.77 | 0.061    | KLDSLTTGFGFPVGLATLADEVG    |
| 67 | gi 24119234  | triosephosphate isomerase 1a [Danio rerio]                      | 48.8 | 248  | 542.18  | 1082.34 | 1081.57 | 37.83 | 0.17     | KFFVGGNWK                  |
|    |              |                                                                 |      |      | 1458.87 | 1457.86 | 1457.72 | 49.98 | 0.01     | HVFGESDELIGQK              |
|    |              |                                                                 |      |      | 801.94  | 1601.87 | 1601.88 | 47.81 | 0.017    | VVLAYEPVWAIGTGK            |
|    |              |                                                                 |      |      | 808.77  | 1615.53 | 1613.82 | 72.55 | 5.40E-05 | RHVFGESDELIGQK             |
| 68 | gi 47087061  | glutamic-oxaloacetic transaminase 2a, mitochondrial (aspartate) | 47.4 | 428  | 644.14  | 1286.26 | 1284.69 | 49.82 | 0.011    | GALDDISKIPEK               |
|    |              |                                                                 |      |      | 706.10  | 1410.19 | 1408.72 | 67.95 | 0.00015  | EYLPIGGLADFSK              |
|    |              |                                                                 |      |      | 723.85  | 1445.68 | 1445.81 | 66.36 | 0.00024  | IAATILNTPELYK              |
|    |              |                                                                 |      |      | 947.98  | 1893.94 | 1893.02 | 70.95 | 6.90E-05 | KLDKEYLPIGGLADFSK          |
|    |              |                                                                 |      |      | 998.97  | 1995.92 | 1994.03 | 41.92 | 0.054    | YFIEQGHNILLSQSFAK          |
|    |              |                                                                 |      |      | 784.61  | 2350.79 | 2350.26 | 62.99 | 0.00038  | ISVAGVTSANVEYLAHAHAIVTK    |
| 69 | gi 47086069  | hypothetical protein LOC406529 [Danio rerio]                    | 65.7 | 283  | 930.44  | 1858.86 | 1858.82 | 97.79 | 1.50E-07 | SQSGVEFTTGGSSNTDTGK        |
|    |              |                                                                 |      |      | 1030.87 | 2059.73 | 2058.12 | 72.35 | 4.80E-05 | VNNASLVGVGYTQSLRPGVK       |
| 70 | gi 48762665  | ubiquinol-cytochrome c reductase core protein II [Danio rerio]  | 52.6 | 454  | 1246.66 | 1245.65 | 1244.68 | 77.74 | 2.00E-05 | KVDFAAAGEPLK               |
|    |              |                                                                 |      |      | 696.14  | 1390.27 | 1390.71 | 74.71 | 3.60E-05 | GVEAVGGSLVSSSR             |
|    |              |                                                                 |      |      | 1265.98 | 3794.90 | 3793.99 | 58.55 | 0.00057  | HQTGAGLVHALVAIEGASATSAI    |
| 71 | gi 68448530  | vitellogenin 5 [Danio rerio]                                    | 44   | 1360 | 587.59  | 1173.17 | 1172.62 | 60.66 | 0.001    | LEFEVQVGPR                 |
|    |              |                                                                 |      |      | 1299.73 | 1298.72 | 1298.71 | 49.73 | 0.011    | EIELTAALPSQK               |
|    |              |                                                                 |      |      | 1706.13 | 1705.12 | 1705.02 | 40.57 | 0.087    | WLLDALPAVGTPVVIK           |
|    |              |                                                                 |      |      | 1074.23 | 3219.66 | 3217.64 | 49.60 | 0.0064   | DIHLPITVPINPDGTFSDINEDFLSI |
| 72 | gi 166795887 | vitellogenin 1 [Danio rerio]                                    | 48.2 | 1362 | 587.59  | 1173.17 | 1172.62 | 60.66 | 0.001    | LEFEVQVGPR                 |
|    |              |                                                                 |      |      | 682.95  | 1363.89 | 1363.69 | 44.02 | 0.039    | HILTAAYDTGFR               |
|    |              |                                                                 |      |      | 691.81  | 1381.61 | 1381.78 | 51.39 | 0.007    | ISDAPAQIVEVLK              |
|    |              |                                                                 |      |      | 1706.13 | 1705.12 | 1705.02 | 40.57 | 0.087    | WLLDALPAVGTPVVIK           |
| 73 | gi 160420306 | hypothetical protein LOC678536 [Danio rerio]                    | 46.1 | 1358 | 587.59  | 1173.17 | 1172.62 | 60.66 | 0.001    | LEFEVQVGPR                 |
|    |              |                                                                 |      |      | 1299.73 | 1298.72 | 1298.71 | 49.73 | 0.011    | EIELTAALPSQK               |
|    |              |                                                                 |      |      | 691.81  | 1381.61 | 1381.78 | 51.39 | 0.007    | ISDAPAQIVEVLK              |
|    |              |                                                                 |      |      | 1706.13 | 1705.12 | 1705.02 | 40.57 | 0.087    | WLLDALPAVGTPVVIK           |
| 74 | gi 113678458 | vitellogenin 2 isoform 1 [Danio rerio]                          | 45.6 | 1631 | 587.59  | 1173.17 | 1172.62 | 60.66 | 0.001    | LEFEVQVGPR                 |
|    |              |                                                                 |      |      | 925.36  | 1848.71 | 1847.86 | 65.37 | 0.00026  | LSENADSEIETETPVK           |
| 75 | gi 41054193  | hypothetical protein LOC327506 [Danio rerio]                    | 47.2 | 178  | 1042.49 | 2082.96 | 2079.97 | 96.83 | 1.70E-07 | GTGGVDTAAVGDTFDISNLDR      |
| 76 | gi 117606264 | sarcalumenin [Danio rerio]                                      | 58.5 | 482  | 731.19  | 1460.36 | 1459.77 | 63.21 | 0.00048  | VTFVDTPGIENR               |

|    |              |                                                                              |      |         |         |         |         |          |                   |                          |
|----|--------------|------------------------------------------------------------------------------|------|---------|---------|---------|---------|----------|-------------------|--------------------------|
|    |              |                                                                              |      | 1738.02 | 1737.01 | 1735.95 | 88.70   | 1.30E-06 | AITHELPSLLGSINSGK |                          |
|    |              |                                                                              |      | 1036.41 | 2070.80 | 2069.08 | 65.94   | 0.00022  | REEISLLEDLNQVIENR |                          |
| 77 | gi 41152342  | creatine kinase, mitochondrial 2 (sarcomeric) [Danio rerio]                  | 54.2 | 413     | 1503.86 | 1502.85 | 1501.78 | 37.62    | 0.18              | GQDITVPSVPSQFK           |
|    |              |                                                                              |      |         | 1042.49 | 2082.96 | 2079.97 | 96.83    | 1.70E-07          | GTGGVDTAAVGDTFDISNLDR    |
| 78 | gi 50344790  | hypothetical protein LOC415158 [Danio rerio]                                 | 54.8 | 104     | 745.36  | 1488.71 | 1487.65 | 60.28    | 0.00096           | TGQAEGFSYTDANK           |
|    |              |                                                                              |      |         | 997.04  | 1992.06 | 1992.95 | 90.95    | 6.70E-07          | GIVWGEDTLMLEYLENPK       |
| 79 | gi 189529437 | PREDICTED: similar to plectin 1 isoform 1 [Danio rerio]                      | 36.8 | 4530    | 669.70  | 2006.06 | 2004.06 | 42.99    | 0.041             | LLDAQLATGGIIDPVESH       |
|    |              |                                                                              |      |         | 1032.88 | 2063.74 | 2062.11 | 98.98    | 1.00E-07          | DGHNLISLLEVLSETLPR       |
|    |              |                                                                              |      |         | 1163.62 | 2325.22 | 2323.14 | 48.85    | 0.01              | IDTAEWGIDLPTVESQLGSHR    |
| 80 | gi 189529439 | PREDICTED: similar to plectin 1 isoform 2 [Danio rerio]                      | 36.6 | 4506    | 669.70  | 2006.06 | 2004.06 | 42.99    | 0.041             | LLDAQLATGGIIDPVESH       |
|    |              |                                                                              |      |         | 1032.88 | 2063.74 | 2062.11 | 98.98    | 1.00E-07          | DGHNLISLLEVLSETLPR       |
|    |              |                                                                              |      |         | 1163.62 | 2325.22 | 2323.14 | 48.85    | 0.01              | IDTAEWGIDLPTVESQLGSHR    |
| 81 | gi 41053939  | malate dehydrogenase 1a, NAD (soluble) [Danio rerio]                         | 85.2 | 305     | 855.23  | 1708.45 | 1706.82 | 92.94    | 4.90E-07          | EIAAFDAVNDESWLK          |
|    |              |                                                                              |      |         | 877.76  | 2630.26 | 2631.29 | 87.23    | 1.30E-06          | NVTIWGNHSSSTQYPDVHHAIVTI |
| 82 | gi 41282154  | aldolase a, fructose-bisphosphate [Danio rerio]                              | 36.5 | 364     | 530.65  | 1059.29 | 1058.57 | 51.67    | 0.0086            | KELSDIAQR                |
|    |              |                                                                              |      |         | 660.09  | 1318.16 | 1317.68 | 91.48    | 7.50E-07          | GILAADESTGSAK            |
|    |              |                                                                              |      |         | 1174.96 | 2347.90 | 2347.17 | 50.36    | 0.007             | GVVPLAGTNGETTTQGLDGLYE   |
| 83 | gi 50344894  | tropomyosin 2 (beta) [Danio rerio]                                           | 46.5 | 284     | 586.14  | 1170.26 | 1169.67 | 66.30    | 0.00025           | LVILEGELER               |
|    |              |                                                                              |      |         | 623.18  | 1244.35 | 1242.65 | 53.21    | 0.0056            | IQLVEEELDR               |
|    |              |                                                                              |      |         | 1298.84 | 1297.83 | 1297.76 | 53.23    | 0.0047            | KLVILEGELER              |
|    |              |                                                                              |      |         | 700.61  | 1399.21 | 1398.75 | 51.35    | 0.0072            | RIQLVEEELDR              |
|    |              |                                                                              |      |         | 709.10  | 1416.18 | 1415.73 | 49.47    | 0.012             | DAQEKLEQAEKK             |
| 84 | gi 47550793  | nicotinamide nucleotide transhydrogenase [Danio rerio]                       | 34.5 | 1079    | 1271.84 | 1270.83 | 1269.68 | 44.80    | 0.036             | SLGAEPLEVDIK             |
|    |              |                                                                              |      |         | 707.70  | 1413.39 | 1412.74 | 49.47    | 0.011             | GVIHVGYTDIPSR            |
|    |              |                                                                              |      |         | 790.14  | 1578.26 | 1577.77 | 42.94    | 0.049             | QGFNVVVEGAGESAK          |
|    |              |                                                                              |      |         | 922.59  | 2764.74 | 2763.39 | 66.57    | 0.00015           | DGSVVVDLAAEAGGNIETTVP    |
| 85 | gi 162287365 | hemopexin [Danio rerio]                                                      | 48.8 | 447     | 1339.69 | 1338.68 | 1338.61 | 51.90    | 0.0061            | FHSDTIESEFK              |
|    |              |                                                                              |      |         | 901.36  | 1800.71 | 1800.00 | 63.19    | 0.00045           | VGKPHTHLEGYPKPLK         |
| 86 | gi 66773050  | myosin, heavy polypeptide 11, smooth muscle [Danio rerio]                    | 43.8 | 1974    | 808.09  | 1614.16 | 1612.69 | 40.36    | 0.089             | DLEEHLEEEEDAR            |
|    |              |                                                                              |      |         | 1000.25 | 1998.48 | 1997.92 | 83.36    | 3.90E-06          | ELEGHISDLQEDLESER        |
|    |              |                                                                              |      |         | 1066.46 | 2130.91 | 2131.00 | 57.42    | 0.0015            | QVEAERDELADLASNASGK      |
| 87 | gi 47086819  | tyrosine 3-monooxygenase/tryptophan 5-monooxygenase [Danio rerio]            | 43.9 | 255     | 1044.76 | 2087.51 | 2086.96 | 98.21    | 1.30E-07          | AAFDDAIAELDTLSEESYK      |
| 88 | gi 47086533  | 2-peptidylprolyl isomerase A [Danio rerio]                                   | 57.9 | 164     | 820.79  | 1639.56 | 1637.91 | 94.27    | 3.50E-07          | HVVFGQVVEGLDVIK          |
| 89 | gi 45387763  | hypothetical protein LOC402975 [Danio rerio]                                 | 41.9 | 284     | 623.18  | 1244.35 | 1242.65 | 53.21    | 0.0056            | IQLVEEELDR               |
|    |              |                                                                              |      |         | 700.61  | 1399.21 | 1398.75 | 51.35    | 0.0072            | RIQLVEEELDR              |
|    |              |                                                                              |      |         | 709.64  | 1417.26 | 1416.75 | 48.43    | 0.015             | DAQEKLEISEKK             |
|    |              |                                                                              |      |         | 770.52  | 2308.54 | 2307.18 | 67.97    | 0.00013           | SVAKLEKTIDDLEDELYAQK     |
| 90 | gi 47085923  | pyruvate dehydrogenase (lipoamide) beta [Danio rerio]                        | 35.1 | 359     | 880.53  | 1759.04 | 1758.94 | 75.76    | 2.60E-05          | SIRPLDADTIETSITK         |
| 91 | gi 66773138  | cytochrome c oxidase subunit Vaa [Danio rerio]                               | 63.1 | 141     | 565.40  | 1128.79 | 1128.63 | 54.53    | 0.0041            | RLDDLASAIR               |
|    |              |                                                                              |      |         | 1105.94 | 3314.79 | 3313.73 | 63.69    | 0.00023           | EIYPYVIQELRPTLDELGIATPEE |
|    |              |                                                                              |      |         | 1693.85 | 3385.68 | 3384.77 | 50.22    | 0.0049            | EIYPYVIQELRPTLDELGIATPEE |
| 92 | gi 47087077  | phosphoglycerate kinase 1 [Danio rerio]                                      | 63.5 | 417     | 666.83  | 1331.65 | 1331.73 | 46.32    | 0.025             | ITLPVDFITADK             |
|    |              |                                                                              |      |         | 818.96  | 1635.91 | 1633.78 | 39.91    | 0.097             | LGDVYVNDAFGTAHR          |
|    |              |                                                                              |      |         | 1740.87 | 1739.86 | 1739.91 | 58.16    | 0.0014            | VSHVSTGGGASLELLEGGK      |
|    |              |                                                                              |      |         | 925.89  | 1849.76 | 1850.97 | 62.41    | 0.00052           | ITLPVDFITADKFDEK         |
|    |              |                                                                              |      |         | 801.08  | 2400.20 | 2400.17 | 46.35    | 0.017             | QIVWNGPVGVFWDNFAHGK      |
| 93 | gi 41054435  | hypothetical protein LOC324244 [Danio rerio]                                 | 33.5 | 248     | 586.14  | 1170.26 | 1169.67 | 66.30    | 0.00025           | LVILEGELER               |
|    |              |                                                                              |      |         | 623.18  | 1244.35 | 1242.65 | 53.21    | 0.0056            | IQLVEEELDR               |
|    |              |                                                                              |      |         | 1298.84 | 1297.83 | 1297.76 | 53.23    | 0.0047            | KLVILEGELER              |
|    |              |                                                                              |      |         | 700.61  | 1399.21 | 1398.75 | 51.35    | 0.0072            | RIQLVEEELDR              |
| 94 | gi 47085905  | tyrosine 3-monooxygenase/tryptophan 5-monooxygenase [Danio rerio]            | 47.5 | 242     | 1074.12 | 2146.22 | 2143.98 | 91.19    | 6.40E-07          | TAFDEAIAELDTLNEDSYK      |
| 95 | gi 189520787 | PREDICTED: tyrosine 3-monooxygenase/tryptophan 5-monooxygenase [Danio rerio] | 58.2 | 244     | 1074.12 | 2146.22 | 2143.98 | 91.19    | 6.40E-07          | TAFDEAIAELDTLNEDSYK      |

|     |              |                                                                                                                   |      |      |         |         |         |        |          |                            |
|-----|--------------|-------------------------------------------------------------------------------------------------------------------|------|------|---------|---------|---------|--------|----------|----------------------------|
| 96  | gj 41055728  | ATPase, Ca++ transporting, cardiac muscle, slow twitch :                                                          | 49.6 | 996  | 1526.85 | 1525.84 | 1524.80 | 69.48  | 0.00011  | DIVPGDIVEVAVGDK            |
|     |              |                                                                                                                   |      |      | 765.37  | 1528.72 | 1526.87 | 36.19  | 0.24     | AIGVVVATGVNTEIGK           |
|     |              |                                                                                                                   |      |      | 789.18  | 1576.34 | 1573.86 | 86.39  | 2.30E-06 | VDQSILTGESVSVIK            |
| 97  | gj 189526600 | PREDICTED: similar to dystonin [Danio rerio]                                                                      | 39.3 | 8365 | 1032.88 | 2063.74 | 2062.11 | 98.98  | 1.00E-07 | DGHNLSLLEVLSETLPR          |
| 98  | gj 153792369 | si:dkey-151c10.1 [Danio rerio]                                                                                    | 38.1 | 4577 | 1032.88 | 2063.74 | 2062.11 | 98.98  | 1.00E-07 | DGHNLSLLEVLSETLPR          |
| 99  | gj 189516972 | PREDICTED: similar to Myosin light polypeptide 4 (Myosin light chain alkali, smooth-muscle isoform [Danio rerio]) | 72.2 | 187  | 757.17  | 1512.33 | 1511.69 | 84.44  | 3.40E-06 | DQGTFFDFVEGLR              |
| 100 | gj 47174755  | hypothetical protein LOC550556 [Danio rerio]                                                                      | 48.3 | 151  | 757.17  | 1512.33 | 1511.69 | 84.44  | 3.40E-06 | DQGTFFDFVEGLR              |
| 101 | gj 62955689  | alpha-tropomyosin [Danio rerio]                                                                                   | 33.7 | 270  | 842.61  | 1683.21 | 1682.84 | 86.73  | 2.00E-06 | AFAEFLTEEIKEEK             |
| 102 | gj 18859505  |                                                                                                                   | 31.7 | 284  | 623.18  | 1244.35 | 1242.65 | 53.21  | 0.0056   | IQLVEEELDR                 |
|     |              |                                                                                                                   |      |      | 700.61  | 1399.21 | 1398.75 | 51.35  | 0.0072   | RIQLVEEELDR                |
|     |              |                                                                                                                   |      |      | 770.52  | 2308.54 | 2307.18 | 67.97  | 0.00013  | SVAKLEKTIDDLEDELYAQK       |
| 103 | gj 68433600  | PREDICTED: similar to LOC495046 protein isoform 1 [Danio rerio]                                                   | 49.9 | 1056 | 1526.85 | 1525.84 | 1524.80 | 69.48  | 0.00011  | DIVPGDIVEVAVGDK            |
|     |              |                                                                                                                   |      |      | 789.18  | 1576.34 | 1573.86 | 86.39  | 2.30E-06 | VDQSILTGESVSVLK            |
| 104 | gj 71892474  | ATPase, Ca++ transporting, cardiac muscle, slow twitch :                                                          | 41.1 | 1035 | 1526.85 | 1525.84 | 1524.80 | 69.48  | 0.00011  | DIVPGDIVEVAVGDK            |
|     |              |                                                                                                                   |      |      | 789.18  | 1576.34 | 1573.86 | 86.39  | 2.30E-06 | VDQSILTGESVSVIK            |
| 105 | gj 41055855  | aldehyde dehydrogenase 4 family, member A1 [Danio rerio]                                                          | 33.8 | 556  | 1044.85 | 2087.69 | 2086.97 | 84.57  | 2.90E-06 | VGDPVEDFSTFFSAVIDDK        |
| 106 | gj 46358344  | isocitrate dehydrogenase 3 (NAD+) alpha [Danio rerio]                                                             | 52.9 | 365  | 1251.50 | 2500.99 | 2501.23 | 87.86  | 1.20E-06 | ENTEGEYSGIEHVIVDGVVQSIK    |
| 107 | gj 41054770  | WD repeat domain 1 [Danio rerio]                                                                                  | 51.3 | 606  | 1296.44 | 2590.87 | 2589.21 | 86.27  | 1.60E-06 | AHDGGIYAVSWSPDSTQLISASQ    |
| 108 | gj 47086247  | proto galectin Gal1-L2 [Danio rerio]                                                                              | 38.1 | 134  | 1339.12 | 2676.23 | 2675.32 | 66.46  | 0.00016  | ITFTNEEFLVTLPDGSEIHFPNR    |
| 109 | gj 41152400  | peptidylprolyl isomerase A, like [Danio rerio]                                                                    | 73.8 | 164  | 686.49  | 1370.97 | 1370.73 | 87.95  | 1.60E-06 | VVDGLDVVDAIEK              |
| 110 | gj 71834286  | hypothetical protein LOC321166 [Danio rerio]                                                                      | 38.3 | 3730 | 637.94  | 1273.86 | 1273.71 | 79.51  | 1.20E-05 | SKVEEILSELK                |
|     |              |                                                                                                                   |      |      | 1036.49 | 3106.45 | 3105.49 | 56.25  | 0.0014   | YDAEEIEAEVSSDVTTTEIHNIITTI |
| 111 | gj 51571925  | hypothetical protein LOC445486 [Danio rerio]                                                                      | 44.8 | 194  | 902.31  | 1802.60 | 1800.95 | 59.54  | 0.0011   | INSELPVDEVFAIVEK           |
|     |              |                                                                                                                   |      |      | 965.71  | 1929.41 | 1929.05 | 73.55  | 3.90E-05 | KINSELPVDEVFAIVEK          |
| 112 | gj 27545193  | creatine kinase, brain [Danio rerio]                                                                              | 40.7 | 381  | 754.73  | 1507.44 | 1506.70 | 57.40  | 0.0017   | GGDDLDPNYVLSSR             |
|     |              |                                                                                                                   |      |      | 894.58  | 1787.15 | 1785.94 | 47.27  | 0.018    | GIESLSVEALGALDGLK          |
|     |              |                                                                                                                   |      |      | 990.39  | 1978.76 | 1977.94 | 66.42  | 0.0002   | GTGGVDTAAGGVFDISNADR       |
| 113 | gj 56118753  | troponin C, slow [Danio rerio]                                                                                    | 44.1 | 161  | 602.40  | 1202.78 | 1202.58 | 47.42  | 0.02     | AAAEQLTDEQK                |
|     |              |                                                                                                                   |      |      | 603.43  | 1204.85 | 1202.58 | 56.44  | 0.0025   | AAAEQLTDEQK                |
|     |              |                                                                                                                   |      |      | 684.11  | 1366.20 | 1364.65 | 62.15  | 0.00058  | NADGYIDLDELK               |
| 114 | gj 58801524  | LIM domain containing preferred translocation partner in                                                          | 47.1 | 556  | 732.30  | 2193.86 | 2193.06 | 41.09  | 0.064    | AEP SHHPAPTPSQGYQPAPPK     |
|     |              |                                                                                                                   |      |      | 1398.18 | 2794.34 | 2793.39 | 116.45 | 1.50E-09 | SSLDAEIDSLTSILADLESSSPYK   |
| 115 | gj 47087349  | coagulation factor II [Danio rerio]                                                                               | 46.8 | 524  | 674.22  | 1346.42 | 1345.80 | 77.10  | 2.10E-05 | IVAIDEIIVHPK               |
|     |              |                                                                                                                   |      |      | 674.76  | 1347.50 | 1345.80 | 80.64  | 8.90E-06 | IVAIDEIIVHPK               |
| 116 | gj 41055546  | hypothetical protein LOC393186 [Danio rerio]                                                                      | 45.9 | 281  | 973.05  | 1944.09 | 1942.85 | 73.38  | 3.90E-05 | SQNGVEFNTSGSTNTDTGK        |
|     |              |                                                                                                                   |      |      | 1044.26 | 2086.51 | 2086.15 | 55.93  | 0.0021   | VNNASLIGIGYTQSLRPGVK       |
| 117 | gj 62955483  | NADH dehydrogenase (ubiquinone) Fe-S protein 3, (NAC)                                                             | 42   | 255  | 1179.48 | 2356.94 | 2358.17 | 88.22  | 1.20E-06 | DPVTHSQLSEFGYVAEILPK       |
|     |              |                                                                                                                   |      |      | 1410.75 | 2819.48 | 2817.31 | 58.87  | 0.00082  | TYTDELTPLDSSVPVFQASNWY     |
| 118 | gj 41152346  | hypothetical protein LOC393668 [Danio rerio]                                                                      | 59.8 | 433  | 1008.31 | 3021.90 | 3020.58 | 67.54  | 0.00011  | HIADLAGNPEVILPVPAFNVINGC   |
| 119 | gj 40538764  | ceruloplasmin [Danio rerio]                                                                                       | 31.1 | 1087 | 828.53  | 1655.05 | 1654.78 | 117.55 | 1.70E-09 | LVDDIVSDTFFDNR             |
| 120 | gj 47777298  | inner membrane protein, mitochondrial (mitofilin) [Danio rerio]                                                   | 61.4 | 757  | 978.83  | 1955.65 | 1955.09 | 75.99  | 2.20E-05 | KPETVKPLQISSLSEATK         |
|     |              |                                                                                                                   |      |      | 1066.23 | 2130.45 | 2130.11 | 36.16  | 0.21     | AELDALAALTAGLEETLGSSAK     |
|     |              |                                                                                                                   |      |      | 732.09  | 2193.24 | 2192.18 | 53.19  | 0.0039   | VTLQAIGAQAALTAIAAHTDK      |
| 121 | gj 41282194  | glutamate dehydrogenase 1 [Danio rerio]                                                                           | 48.2 | 542  | 785.85  | 1569.68 | 1568.77 | 91.97  | 6.30E-07 | IIEGANGPTTPDADK            |
| 122 | gj 51972166  | radixin isoform 1 [Danio rerio]                                                                                   | 41.3 | 579  | 481.06  | 960.10  | 958.59  | 46.63  | 0.028    | FVIKPIDK                   |
|     |              |                                                                                                                   |      |      | 1683.89 | 1682.88 | 1682.85 | 73.28  | 4.40E-05 | NQEHLATELAELTSK            |
| 123 | gj 189535578 | PREDICTED: fetuin B [Danio rerio]                                                                                 | 32.7 | 498  | 1117.51 | 2233.01 | 2233.01 | 59.36  | 0.00092  | KDETHEHDHEIVLDHDK          |
|     |              |                                                                                                                   |      |      | 797.59  | 2389.73 | 2389.01 | 53.15  | 0.0035   | AHEHGQDEWEHQHHQYGHK        |
| 124 | gj 41055654  | hypothetical protein LOC393165 isoform 2 [Danio rerio]                                                            | 61.3 | 628  | 1025.69 | 2049.36 | 2049.07 | 51.32  | 0.0062   | KPVLETEVNHVSPLSDASK        |
|     |              |                                                                                                                   |      |      | 1079.64 | 2157.27 | 2155.09 | 92.58  | 4.70E-07 | ILAQITGTENDQAQESRPGK       |
| 125 | gj 18859045  | mitochondrial carrier homolog 2 [Danio rerio]                                                                     | 40.3 | 300  | 824.74  | 1647.47 | 1647.80 | 48.34  | 0.015    | SDEGSLQQVINETTK            |
|     |              |                                                                                                                   |      |      | 843.43  | 1684.84 | 1684.96 | 56.86  | 0.002    | VLVQVGHEPLAPTLGR           |

|     |              |                                                                                                |      |      |         |         |         |        |          |                          |
|-----|--------------|------------------------------------------------------------------------------------------------|------|------|---------|---------|---------|--------|----------|--------------------------|
| 126 | gi 116004537 | hypothetical protein LOC564694 [Danio rerio]                                                   | 50.4 | 381  | 754.73  | 1507.44 | 1506.70 | 57.40  | 0.0017   | GGDDLDPNYVLSSR           |
|     |              |                                                                                                |      |      | 990.39  | 1978.76 | 1977.94 | 66.42  | 0.0002   | GTGGVDTAAVGGVFDISNADR    |
| 127 | gi 56693302  | heat shock protein, alpha-crystallin-related, 1 [Danio rerio]                                  | 48.7 | 199  | 667.37  | 1332.73 | 1332.69 | 69.63  | 0.00011  | KYTLPPGVDSEK             |
|     |              |                                                                                                |      |      | 921.78  | 1841.54 | 1839.94 | 54.79  | 0.003    | ISLDVNHFSPEELNVK         |
| 128 | gi 41152448  | NADH dehydrogenase (ubiquinone) 1 alpha subcomplex, fumarate hydratase precursor [Danio rerio] | 51   | 355  | 1228.12 | 2454.22 | 2454.31 | 90.23  | 7.00E-07 | LLQYSDAVEHLLTTGQGVILER   |
| 129 | gi 41055718  |                                                                                                | 51.5 | 509  | 1077.99 | 2153.96 | 2153.18 | 63.34  | 0.00039  | EVHEVLLPGLQTLHDALAAK     |
|     |              |                                                                                                |      |      | 1251.93 | 2501.85 | 2501.26 | 77.23  | 1.30E-05 | THTQDAVPLSLGQEFGGYVQQV   |
| 130 | gi 41151982  | major vault protein [Danio rerio]                                                              | 53.1 | 863  | 1019.64 | 2037.26 | 2036.88 | 108.34 | 1.20E-08 | AVEAFIDTQGDEAESEER       |
| 131 | gi 80751141  | solute carrier family 8 (sodium/calcium exchanger), member 1 [Danio rerio]                     | 30.3 | 974  | 985.15  | 1968.29 | 1968.04 | 63.87  | 0.00035  | EGVILPIWTPVNPSPFGDK      |
|     |              |                                                                                                |      |      | 1212.35 | 2422.69 | 2422.06 | 42.42  | 0.043    | GGGEDFEDTHGVLEFQNDSEIK   |
| 132 | gi 41053873  | succinate dehydrogenase complex, subunit A, flavoprotein [Danio rerio]                         | 55.7 | 661  | 738.79  | 1475.57 | 1473.75 | 60.59  | 0.00088  | KHTLSYVDPETGK            |
| 133 | gi 113195582 | hypothetical protein LOC556489 [Danio rerio]                                                   | 54.4 | 226  | 724.13  | 1446.24 | 1445.78 | 60.12  | 0.001    | VIFEAEETKPGVK            |
|     |              |                                                                                                |      |      | 881.73  | 2642.17 | 2641.29 | 65.66  | 0.00019  | SPDPAAVEHKPEESKPEESKPE   |
| 134 | gi 47086479  | solute carrier family 25 (mitochondrial carrier, Aralar), member 1 [Danio rerio]               | 46.9 | 682  | 406.52  | 811.02  | 810.48  | 45.06  | 0.026    | FGLHLPK                  |
|     |              |                                                                                                |      |      | 622.59  | 1243.16 | 1240.68 | 51.93  | 0.0073   | LQVAGEITTGPR             |
|     |              |                                                                                                |      |      | 1325.61 | 1324.60 | 1324.74 | 85.06  | 3.00E-06 | TVHLLAGVADTTK            |
| 135 | gi 189521338 | PREDICTED: hypothetical protein [Danio rerio]                                                  | 46.1 | 523  | 789.78  | 1577.54 | 1577.76 | 37.55  | 0.17     | YDVQVQIENVEDK            |
|     |              |                                                                                                |      |      | 790.64  | 1579.27 | 1577.76 | 97.12  | 1.80E-07 | YDVQVQIENVEDK            |
| 136 | gi 189526930 | PREDICTED: similar to c-Cbl associated protein [Danio rerio]                                   | 40.5 | 1015 | 918.74  | 1835.46 | 1834.94 | 67.53  | 0.00016  | HAGLVVTHQQFITNDR         |
| 137 | gi 41053732  | aldehyde dehydrogenase 2 precursor [Danio rerio]                                               | 56.6 | 516  | 881.60  | 1761.19 | 1760.83 | 67.29  | 0.00018  | TFVQESIYDEFVER           |
|     |              |                                                                                                |      |      | 778.04  | 2331.08 | 2330.19 | 63.12  | 0.00038  | VAFTGSTDVGHLIQQASSASNLI  |
| 138 | gi 189537447 | PREDICTED: similar to Ndufa9 protein [Danio rerio]                                             | 32.6 | 380  | 691.30  | 1380.58 | 1379.71 | 71.30  | 7.10E-05 | FFEAAVGEAKPSK            |
|     |              |                                                                                                |      |      | 1079.82 | 2157.62 | 2155.10 | 42.96  | 0.043    | YDLPGLLEDLITPASIEQK      |
| 139 | gi 56118264  | actinin alpha 3 [Danio rerio]                                                                  | 32.7 | 896  | 826.12  | 1650.22 | 1648.81 | 71.27  | 7.40E-05 | KAGTQIENIEEDFR           |
| 140 | gi 153791915 | hypothetical protein LOC100006671 [Danio rerio]                                                | 31.1 | 151  | 826.12  | 1650.22 | 1648.81 | 71.27  | 7.40E-05 | KAGTQIENIEEDFR           |
| 141 | gi 56090150  | NADH dehydrogenase (ubiquinone) Fe-S protein 1 [Danio rerio]                                   | 57.3 | 731  | 1570.82 | 3139.63 | 3139.56 | 75.20  | 1.70E-05 | DSFIVYQGHGHDVGAADIADVILP |
| 142 | gi 31044489  | heat shock 60 kD protein 1 [Danio rerio]                                                       | 73   | 575  | 814.72  | 2441.14 | 2439.35 | 53.75  | 0.0031   | TALLDAAGVASLLSTAEAVVTEII |
|     |              |                                                                                                |      |      | 942.68  | 2825.01 | 2825.53 | 73.70  | 2.70E-05 | TALLDAAGVASLLSTAEAVVTEII |
| 143 | gi 46559752  | ATPase, Na <sup>+</sup> /K <sup>+</sup> transporting, beta 1a polypeptide [Danio rerio]        | 33.3 | 306  | 700.18  | 1398.35 | 1398.75 | 68.66  | 0.00013  | REEEANLLGQIK             |
| 144 | gi 189531406 | PREDICTED: similar to nicotinamide nucleotide transhydrogenase [Danio rerio]                   | 39.3 | 679  | 553.22  | 1104.42 | 1102.64 | 47.20  | 0.022    | YKDVVVGVPK               |
|     |              |                                                                                                |      |      | 1153.05 | 2304.08 | 2303.11 | 75.64  | 2.10E-05 | SFGAEPLEVHIAESGEGVGGYA   |
| 145 | gi 41056085  | keratin 8 [Danio rerio]                                                                        | 30.6 | 520  | 545.21  | 1088.41 | 1087.55 | 50.59  | 0.011    | KLLEGEEDR                |
|     |              |                                                                                                |      |      | 744.37  | 1486.73 | 1485.71 | 41.88  | 0.065    | ANLENQIAEAEER            |
|     |              |                                                                                                |      |      | 1009.39 | 2016.76 | 2017.16 | 59.54  | 0.00094  | SLLAPLNLEIDPNIQIVR       |
| 146 | gi 23308625  | fatty acid binding protein 3, muscle and heart [Danio rerio]                                   | 51.9 | 133  | 749.63  | 1497.24 | 1496.63 | 69.94  | 9.50E-05 | LGEEFDETTADDR            |
| 147 | gi 18858657  | fatty acid binding protein 7, brain, alpha [Danio rerio]                                       | 33.3 | 132  | 749.63  | 1497.24 | 1496.63 | 69.94  | 9.50E-05 | LGEEFDETTADDR            |
| 148 | gi 66472610  | hypothetical protein LOC553595 [Danio rerio]                                                   | 48.7 | 275  | 1284.63 | 2567.24 | 2566.31 | 88.00  | 1.10E-06 | STPTDLVTEADHQVEELIISTLR  |
| 149 | gi 18859423  | spectrin, beta, erythrocytic [Danio rerio]                                                     | 39.9 | 2357 | 714.77  | 1427.52 | 1425.74 | 43.23  | 0.047    | HRPDLVDYGNLK             |
|     |              |                                                                                                |      |      | 945.01  | 1888.00 | 1887.93 | 72.39  | 5.20E-05 | KKHDAIETDIAAYEER         |
|     |              |                                                                                                |      |      | 733.65  | 2197.91 | 2197.09 | 36.78  | 0.18     | IIDELIEGGHSESATLAEWK     |
| 150 | gi 47085999  | hypothetical protein LOC406484 [Danio rerio]                                                   | 30.7 | 361  | 722.75  | 1443.49 | 1443.76 | 85.59  | 2.80E-06 | GQAFLLDLILDPK            |
| 151 | gi 41152453  | tyrosine 3-monooxygenase/tryptophan 5-monooxygenase [Danio rerio]                              | 29.8 | 245  | 782.16  | 1562.31 | 1560.73 | 50.70  | 0.0084   | AVTEGDIELSNEER           |
|     |              |                                                                                                |      |      | 1073.02 | 2144.03 | 2143.98 | 56.16  | 0.002    | TAFDEAIAELDSLNEESYK      |
| 152 | gi 61806484  | hypothetical protein LOC541328 [Danio rerio]                                                   | 57.8 | 116  | 839.77  | 1677.52 | 1677.88 | 62.40  | 0.00058  | TTGLVGLAVSQNPHER         |
| 153 | gi 52219158  | aquaporin 8 [Danio rerio]                                                                      | 20.4 | 260  | 1057.84 | 2113.66 | 2113.97 | 41.95  | 0.054    | SELFTVATGDGGDNHQNPQPK    |
|     |              |                                                                                                |      |      | 1058.64 | 2115.26 | 2113.97 | 55.18  | 0.0026   | SELFTVATGDGGDNHQNPQPK    |
| 154 | gi 58801528  | SET translocation (myeloid leukemia-associated) A [Danio rerio]                                | 22.7 | 269  | 1098.65 | 2195.28 | 2194.01 | 56.17  | 0.002    | EQQAIEHIDEVQNEIDR        |
| 155 | gi 58801526  | SET translocation (myeloid leukemia-associated) B [Danio rerio]                                | 16.7 | 275  | 1098.65 | 2195.28 | 2194.01 | 56.17  | 0.002    | EQQAIEHIDEVQNEIDR        |
| 156 | gi 117606266 | ATPase, Ca <sup>++</sup> transporting, cardiac muscle, fast twitch 1 [Danio rerio]             | 46.6 | 991  | 789.18  | 1576.34 | 1573.86 | 86.39  | 2.30E-06 | VDQSILTGESVSVIK          |
| 157 | gi 55741944  | wu:cegs655 [Danio rerio]                                                                       | 45.8 | 994  | 789.18  | 1576.34 | 1573.86 | 86.39  | 2.30E-06 | VDQSILTGESVSVIK          |
| 158 | gi 57526509  | propionyl-Coenzyme A carboxylase, alpha polypeptide [Danio rerio]                              | 57.8 | 709  | 825.71  | 1649.40 | 1649.84 | 62.28  | 0.0006   | TVAVHSDVDSSAVHVK         |
|     |              |                                                                                                |      |      | 945.77  | 1889.53 | 1887.95 | 48.08  | 0.014    | LTGAQAVHPGYGFLSENK       |

|     |              |                                                                 |      |      |         |         |         |       |          |                          |
|-----|--------------|-----------------------------------------------------------------|------|------|---------|---------|---------|-------|----------|--------------------------|
| 159 | gj 50344731  | fibrinogen alpha chain [Danio rerio]                            | 56.1 | 684  | 677.11  | 1352.21 | 1350.70 | 80.92 | 7.60E-06 | LGISDSEFLTAAK            |
| 160 | gj 54400460  | fibulin 5 [Danio rerio]                                         | 31.2 | 477  | 1111.43 | 2220.84 | 2220.00 | 80.84 | 6.70E-06 | NSPLPYPEASYPEEYPDR       |
| 161 | gj 55925387  | carnitine palmitoyltransferase II [Danio rerio]                 | 49.9 | 668  | 1127.33 | 2252.65 | 2252.11 | 56.20 | 0.002    | YLAAQRPLLNDEQYSNTEK      |
|     |              |                                                                 |      |      | 1193.60 | 2385.19 | 2384.18 | 44.83 | 0.025    | DTTEKPLVGPQSQPASVDSSSA   |
| 162 | gj 47777306  | Voltage-dependent anion channel 1 [Danio rerio]                 | 61.5 | 283  | 1045.96 | 2089.91 | 2088.16 | 80.68 | 7.20E-06 | VNSSLVGLGYTQTLKPGIK      |
| 163 | gj 113679439 | hypothetical protein LOC751638 [Danio rerio]                    | 47.6 | 126  | 637.26  | 1272.51 | 1272.68 | 49.46 | 0.012    | GQDPYSILRPK              |
|     |              |                                                                 |      |      | 468.43  | 1402.27 | 1400.78 | 36.47 | 0.24     | KGQDPYSILRPK             |
|     |              |                                                                 |      |      | 1471.59 | 1470.58 | 1470.70 | 64.81 | 0.00032  | GIPTDDEQAAGLER           |
| 164 | gj 41387118  | ubiquinol-cytochrome c reductase core I protein [Danio rerio]   | 48.7 | 474  | 943.51  | 1885.00 | 1882.98 | 79.05 | 1.10E-05 | MVLATAGGVSHDEVVSLAK      |
| 165 | gj 68362804  | PREDICTED: similar to Histone H4 replacement CG3379             | 61.2 | 103  | 495.60  | 989.18  | 988.57  | 47.01 | 0.025    | VFLENVIR                 |
|     |              |                                                                 |      |      | 591.57  | 1181.13 | 1179.61 | 59.87 | 0.001    | ISGLIYEETR               |
| 166 | gj 189538855 | PREDICTED: similar to sarcalumenin [Danio rerio]                | 31   | 882  | 731.19  | 1460.36 | 1459.77 | 63.21 | 0.00048  | VTFVDTPGIENR             |
|     |              |                                                                 |      |      | 783.21  | 1564.40 | 1564.67 | 41.58 | 0.067    | SEELSQEEAASEEK           |
| 167 | gj 41386743  | eukaryotic translation elongation factor 2, like [Danio rerio]  | 41.1 | 858  | 703.72  | 1405.42 | 1404.80 | 77.74 | 1.70E-05 | TFAQLILDPIFK             |
| 168 | gj 18858399  | cadherin 2, neuronal [Danio rerio]                              | 22.7 | 783  | 1148.25 | 3441.71 | 3440.82 | 76.41 | 1.10E-05 | YSVTGPGADQNPTGLFIIDPISGI |
| 169 | gj 189530625 | PREDICTED: similar to spectrin repeat containing, nucle         | 36.9 | 8621 | 550.38  | 1098.74 | 1097.66 | 63.31 | 0.00054  | QLADAIAKLR               |
| 170 | gj 68389723  | PREDICTED: catechol-O-methyltransferase domain cont             | 70.2 | 238  | 778.40  | 1554.79 | 1553.87 | 76.16 | 2.30E-05 | KGGIVAINVNLWGGR          |
| 171 | gj 41056123  | phosphoglycerate mutase 2 (muscle) [Danio rerio]                | 40   | 255  | 827.80  | 1653.58 | 1653.91 | 71.00 | 7.40E-05 | ALPFWNEVIVPEIK           |
| 172 | gj 50540420  | branched chain aminotransferase 2, mitochondrial [Danio rerio]  | 20   | 415  | 900.83  | 1799.64 | 1799.02 | 46.62 | 0.02     | SSVLKPKPDPSTLVFGK        |
| 173 | gj 52219190  | hypothetical protein LOC447942 [Danio rerio]                    | 30.1 | 103  | 1168.02 | 3501.04 | 3500.62 | 45.24 | 0.014    | TKPWPWGDGNHSLFHNPHNTA    |
| 174 | gj 189535572 | PREDICTED: hypothetical protein [Danio rerio]                   | 64.6 | 455  | 824.81  | 1647.61 | 1645.83 | 39.41 | 0.12     | KCPDCPGLLPLHEPK          |
|     |              |                                                                 |      |      | 654.65  | 1960.93 | 1959.96 | 43.44 | 0.039    | FHDHRPGSVHPLGPDHR        |
| 175 | gj 189525434 | PREDICTED: im:7157373 [Danio rerio]                             | 59.3 | 545  | 1430.98 | 2859.95 | 2859.32 | 74.75 | 2.10E-05 | SAAAPPKEEAPPANAPDGDAPA   |
| 176 | gj 68444185  | PREDICTED: cytochrome c oxidase subunit Vab [Danio rerio]       | 77.9 | 172  | 565.40  | 1128.79 | 1127.64 | 45.39 | 0.034    | RLNDLASAIR               |
|     |              |                                                                 |      |      | 1106.47 | 3316.39 | 3314.75 | 67.87 | 8.70E-05 | EIYPYVIQELKPTLQELGISTPEE |
| 177 | gj 62122813  | 3-hydroxyisobutyryl-Coenzyme A hydrolase [Danio rerio]          | 52.4 | 382  | 897.46  | 1792.91 | 1790.92 | 71.86 | 6.10E-05 | WKPSTLAGVSEQFVDK         |
| 178 | gj 189517274 | PREDICTED: hypothetical protein [Danio rerio]                   | 39.1 | 797  | 602.97  | 1203.92 | 1201.66 | 58.26 | 0.0016   | MRNLTEGILR               |
| 179 | gj 18858281  | apolipoprotein A-I [Danio rerio]                                | 48.5 | 262  | 822.99  | 1643.96 | 1643.73 | 71.47 | 7.00E-05 | ALDNLGTDYEYK             |
| 180 | gj 50540186  | hypothetical protein LOC436833 [Danio rerio]                    | 32.3 | 229  | 1079.82 | 2157.63 | 2156.16 | 60.52 | 0.00075  | AGLTASEVDELLTLATSQPIK    |
| 181 | gj 150378483 | heat shock protein, alpha-crystallin-related, b11 [Danio rerio] | 23.4 | 205  | 1113.16 | 2224.31 | 2223.99 | 70.86 | 6.80E-05 | NPALQNSEPENQAVEAEEAEN    |
| 182 | gj 49274617  | tropomyosin 1 alpha [Danio rerio]                               | 44.4 | 284  | 623.18  | 1244.35 | 1242.65 | 53.21 | 0.0056   | IQLVEEELDR               |
|     |              |                                                                 |      |      | 700.61  | 1399.21 | 1398.75 | 51.35 | 0.0072   | RIQLVEEELDR              |
| 183 | gj 41393141  | tropomyosin 3 [Danio rerio]                                     | 37.5 | 248  | 623.18  | 1244.35 | 1242.65 | 53.21 | 0.0056   | IQLVEEELDR               |
|     |              |                                                                 |      |      | 700.61  | 1399.21 | 1398.75 | 51.35 | 0.0072   | RIQLVEEELDR              |
| 184 | gj 136429    | Trypsin precursor                                               | 66.8 | 232  | 737.73  | 2210.15 | 2210.10 | 70.33 | 7.40E-05 | LGEHNIDVLEGNEQFINAAK     |
| 185 | gj 57528846  | hypothetical protein LOC445255 [Danio rerio]                    | 37.7 | 207  | 770.14  | 1538.26 | 1537.87 | 69.95 | 9.50E-05 | AEEDKIPLLLVGNK           |
| 186 | gj 123706335 | hypothetical protein LOC791136 [Danio rerio]                    | 52.7 | 313  | 1223.67 | 2445.33 | 2443.21 | 48.42 | 0.01     | QILANPFQDYVNTHPVSHAHR    |
|     |              |                                                                 |      |      | 1296.63 | 2591.25 | 2589.22 | 42.49 | 0.038    | GTKDDPIEPQQAIPDAQSFEFEK  |
| 187 | gj 70778808  | vesicle amine transport protein 1 [Danio rerio]                 | 37.2 | 484  | 904.58  | 1807.15 | 1806.90 | 69.69 | 0.0001   | HEVISQGGVTHPIDYR         |
| 188 | gj 189517050 | PREDICTED: glycine C-acetyltransferase [Danio rerio]            | 58.5 | 458  | 785.77  | 1569.52 | 1568.74 | 69.25 | 0.00012  | VQISAAHTDEDIDR           |
| 189 | gj 114326248 | elastin b [Danio rerio]                                         | 16.6 | 2054 | 888.60  | 1775.19 | 1772.86 | 68.41 | 0.00015  | SYGGAGALGGAGQGGIGGGPGC   |
| 190 | gj 189528827 | PREDICTED: similar to LOC567732 protein [Danio rerio]           | 41.7 | 1368 | 1212.77 | 2423.53 | 2422.19 | 68.39 | 0.00011  | GQNHLEEVELAFPQNVIIEGSGR  |
| 191 | gj 189516653 | PREDICTED: myosin, heavy chain 9, non-muscle like-1,            | 34.7 | 1754 | 575.38  | 1723.12 | 1721.89 | 38.26 | 0.14     | KQELEEILHDLEAR           |
|     |              |                                                                 |      |      | 958.30  | 1914.58 | 1913.91 | 68.34 | 0.00013  | HSQAFDELNEQLEQVK         |
| 192 | gj 189535920 | PREDICTED: similar to Filamin-A (Alpha-filamin) (Filamin A)     | 53.2 | 2523 | 1207.46 | 2412.90 | 2411.15 | 54.31 | 0.0028   | EGPYSINVLVADEEIPQSPYK    |
|     |              |                                                                 |      |      | 1178.80 | 3533.36 | 3531.58 | 47.45 | 0.0089   | DLGDGTYQVEYTPYEEGTHSVE   |
| 193 | gj 51571951  | aldehyde dehydrogenase 2b [Danio rerio]                         | 41.5 | 516  | 881.60  | 1761.19 | 1760.83 | 67.29 | 0.00018  | TFVQESIYDEFVER           |
| 194 | gj 41054571  | citrate synthase [Danio rerio]                                  | 39.5 | 468  | 564.10  | 1126.18 | 1126.65 | 40.48 | 0.095    | ALGFPLRPK                |
|     |              |                                                                 |      |      | 881.85  | 1761.69 | 1761.88 | 63.55 | 0.00044  | GLVYETSVLDPDEGIR         |
| 195 | gj 27545305  | laminin, gamma 1 [Danio rerio]                                  | 55.8 | 1593 | 1175.40 | 2348.79 | 2346.18 | 66.83 | 0.00016  | LLDLQNLIDSLDNTETTIVSDK   |
| 196 | gj 41055614  | hypothetical protein LOC393478 [Danio rerio]                    | 59.3 | 86   | 1465.66 | 1464.65 | 1464.65 | 41.10 | 0.075    | WDSQIEDGSFPGK            |
|     |              |                                                                 |      |      | 733.65  | 1465.28 | 1464.65 | 61.22 | 0.00072  | WDSQIEDGSFPGK            |

|     |              |                                                              |      |      |         |         |         |       |         |                          |
|-----|--------------|--------------------------------------------------------------|------|------|---------|---------|---------|-------|---------|--------------------------|
| 197 | gj 55742559  | Rho GDP dissociation inhibitor (GDI) alpha [Danio rerio]     | 47.3 | 203  | 960.67  | 1919.32 | 1916.90 | 52.99 | 0.0045  | SLQEIQELDQDDESLR         |
|     |              |                                                              |      |      | 1023.83 | 2045.64 | 2044.99 | 51.22 | 0.0065  | SLQEIQELDQDDESLRK        |
| 198 | gj 121583986 | hypothetical protein LOC557972 [Danio rerio]                 | 36.5 | 562  | 1071.25 | 2140.48 | 2138.14 | 66.20 | 0.0002  | TFLVIPELAQELHVWTDK       |
| 199 | gj 41152334  | ATP synthase, H+ transporting, mitochondrial F0 comple:      | 44.7 | 161  | 573.43  | 1144.85 | 1144.54 | 66.01 | 0.00029 | IDAQEQEANK               |
| 200 | gj 41053347  | mitochondrial trifunctional protein, beta subunit [Danio rei | 41   | 471  | 710.16  | 1418.30 | 1415.77 | 65.85 | 0.00027 | DQLLLGPTYATPK            |
| 201 | gj 189522849 | PREDICTED: similar to oxoglutarate (alpha-ketoglutarate      | 31.8 | 961  | 834.04  | 1666.06 | 1665.82 | 38.69 | 0.13    | VITDDGPPAQNPSSEVK        |
|     |              |                                                              |      |      | 1201.44 | 2400.87 | 2399.32 | 54.83 | 0.0025  | NITLSLVANPSHLEAVNPVVQGH  |
| 202 | gj 189518755 | PREDICTED: similar to malic enzyme 2, NAD(+)-depend          | 66.3 | 581  | 1093.78 | 2185.54 | 2184.23 | 53.23 | 0.004   | SFLDAVNVIKPTAIIQVSGAGR   |
| 203 | gj 189527793 | PREDICTED: wu:fb05a01 [Danio rerio]                          | 50.8 | 6009 | 579.12  | 1156.23 | 1155.65 | 54.20 | 0.0041  | LKGDVDVSVPK              |
|     |              |                                                              |      |      | 1033.94 | 2065.86 | 2062.98 | 46.95 | 0.017   | SDASLSGGIENQEGNLTFPK     |
| 204 | gj 148596955 | ATP synthase, H+ transporting, mitochondrial F0 comple:      | 19.7 | 71   | 817.37  | 1632.73 | 1631.83 | 63.17 | 0.00049 | RYDNLKPIAEEER            |
| 205 | gj 41055939  | sorting and assembly machinery component 50 homolog          | 38.4 | 469  | 997.86  | 1993.70 | 1992.02 | 64.82 | 0.00028 | TKEDILTYEIAADVFAK        |
| 206 | gj 41056175  | programmed cell death 8 (apoptosis-inducing factor) [Dar     | 37.7 | 751  | 736.65  | 1471.28 | 1471.66 | 64.47 | 0.00036 | SAGLEVSDSDFGGYR          |
| 207 | gj 57525836  | hypothetical protein LOC445175 [Danio rerio]                 | 53.1 | 697  | 1302.96 | 1301.95 | 1301.66 | 64.35 | 0.00039 | SHIDELYANIK              |
| 208 | gj 113678983 | hypothetical protein LOC751707 [Danio rerio]                 | 37.8 | 606  | 1090.76 | 2179.50 | 2179.07 | 64.20 | 0.00031 | GGENIYPAEIEQFLHHPK       |
| 209 | gj 51011067  | pyruvate kinase, muscle, b [Danio rerio]                     | 40.8 | 530  | 904.59  | 1807.16 | 1806.98 | 63.88 | 0.00038 | KGVNLPGANVDLPVSEK        |
| 210 | gj 189538766 | PREDICTED: similar to mitogen-activated protein kinase-      | 54   | 535  | 778.04  | 2331.08 | 2330.19 | 63.12 | 0.00038 | VAFTGSTDVGHLIQQASSASNLI  |
| 211 | gj 41055658  | 3-hydroxyisobutyrate dehydrogenase b [Danio rerio]           | 70.2 | 329  | 865.98  | 1729.95 | 1729.95 | 62.94 | 0.00049 | KGSLIDSSTIDPAVSK         |
| 212 | gj 125828659 | PREDICTED: hypothetical protein LOC449551 [Danio rei         | 63.5 | 126  | 1270.39 | 2538.76 | 2538.31 | 62.53 | 0.00039 | LVVNDGPDGGQSVYHIHIHVLG   |
| 213 | gj 189514551 | PREDICTED: sorbin and SH3 domain containing 2a [Dar          | 37   | 2115 | 1419.48 | 2836.94 | 2835.44 | 62.39 | 0.00037 | GAFTPSPLDPASTSDSHIASLSIK |
| 214 | gj 113678245 | hypothetical protein LOC558738 [Danio rerio]                 | 62.2 | 111  | 846.23  | 1690.45 | 1689.84 | 61.33 | 0.00074 | IEFSPLDAWNSGVQK          |
| 215 | gj 189526598 | PREDICTED: similar to COASTER [Danio rerio]                  | 40.7 | 916  | 657.73  | 1313.44 | 1312.78 | 53.00 | 0.0051  | QAVALSLEARK              |
| 216 | gj 68444865  | PREDICTED: dodecenoyl-Coenzyme A delta isomerase             | 56.1 | 301  | 663.69  | 1325.37 | 1325.71 | 52.34 | 0.0058  | IGLVDELVPEDK             |
| 217 | gj 51010975  | hypothetical protein LOC445053 [Danio rerio]                 | 30.4 | 204  | 853.72  | 1705.42 | 1704.91 | 61.21 | 0.00075 | GATYGKPVHGHVGNQIK        |
| 218 | gj 189533438 | PREDICTED: novel protein similar to vertebrate apolipop      | 40.5 | 2633 | 1230.41 | 2458.81 | 2458.19 | 61.14 | 0.00054 | HAINQEINAYNTPAQFGLEGSGH  |
| 219 | gj 54400426  | ATP synthase, H+ transporting, mitochondrial F0 comple:      | 67.1 | 252  | 764.44  | 1526.87 | 1526.78 | 52.48 | 0.0055  | LDYQVELQNLHR             |
| 220 | gj 41152175  | ribosomal protein S7 [Danio rerio]                           | 60.3 | 194  | 733.47  | 1464.93 | 1464.94 | 60.08 | 0.00094 | KAIIFVVPVQLK             |
| 221 | gj 189532432 | PREDICTED: novel protein similar to vertebrate AT rich ii    | 25.7 | 2113 | 653.09  | 1304.16 | 1303.77 | 57.14 | 0.002   | RCLIEIFGILK              |
| 222 | gj 189532434 | PREDICTED: im:7160733 [Danio rerio]                          | 25.1 | 1248 | 653.09  | 1304.16 | 1303.77 | 57.14 | 0.002   | RCLIEIFGILK              |
| 223 | gj 189516256 | PREDICTED: similar to phosphofructokinase, platelet [D       | 56.8 | 782  | 707.25  | 1412.48 | 1411.69 | 59.91 | 0.001   | DLQSNVEHLTEK             |
| 224 | gj 52219010  | EH-domain containing 3, like [Danio rerio]                   | 21.6 | 532  | 853.20  | 1704.38 | 1703.91 | 58.84 | 0.0013  | KKDPELFQTVSDGLK          |
| 225 | gj 125854185 | PREDICTED: hypothetical protein [Danio rerio]                | 16.6 | 645  | 672.86  | 1343.71 | 1346.62 | 48.88 | 0.014   | EEEEEQKADK               |
| 226 | gj 74315945  | hypothetical protein LOC613246 [Danio rerio]                 | 51.2 | 422  | 1048.40 | 2094.79 | 2092.98 | 58.42 | 0.0012  | ALVGNEASEELQSADGNPHR     |
| 227 | gj 47086875  | glutamate dehydrogenase 1a [Danio rerio]                     | 48.5 | 544  | 862.40  | 1722.79 | 1722.87 | 57.43 | 0.0017  | HGGAIPIVPTSDFQER         |
| 228 | gj 123858772 | protein phosphatase 1, catalytic subunit, beta [Danio reri   | 79.5 | 327  | 978.50  | 1954.99 | 1952.12 | 57.82 | 0.0014  | EIFLSQPILLELEAPLK        |
| 229 | gj 189518709 | PREDICTED: wu:fi22e08 [Danio rerio]                          | 49.2 | 323  | 978.50  | 1954.99 | 1952.12 | 57.82 | 0.0014  | EIFLSQPILLELEAPLK        |
| 230 | gj 47550715  | heterogeneous nuclear ribonucleoprotein A0 [Danio rerio]     | 44.9 | 314  | 843.62  | 1685.23 | 1683.72 | 57.64 | 0.0017  | GFGFVHFEDNDSADK          |
| 231 | gj 41056209  | hypothetical protein LOC393532 [Danio rerio]                 | 35.3 | 490  | 1012.59 | 2023.16 | 2022.00 | 56.97 | 0.0017  | HILDTHGLDPHQATASGPR      |
| 232 | gj 33667057  | calmodulin 2, gamma [Danio rerio]                            | 20.1 | 149  | 923.68  | 1845.34 | 1843.88 | 56.77 | 0.0019  | EAFSLFDKDGDTITTK         |
| 233 | gj 189532998 | PREDICTED: similar to calmodulin 2 [Danio rerio]             | 21.7 | 152  | 923.68  | 1845.34 | 1843.88 | 56.77 | 0.0019  | EAFSLFDKDGDTITTK         |
| 234 | gj 56693257  | hypothetical protein LOC494050 [Danio rerio]                 | 53.3 | 368  | 1035.13 | 3102.35 | 3100.58 | 51.88 | 0.0038  | ILLDQQQEHTVETPHGVLHVTVH  |
| 235 | gj 41053611  | hypothetical protein LOC393828 [Danio rerio]                 | 27.2 | 213  | 1200.94 | 2399.87 | 2399.16 | 56.18 | 0.0018  | SYHSPWEEAIINDPTLADTLK    |
| 236 | gj 38707985  | electron-transfer-flavoprotein, alpha polypeptide [Danio r   | 41.4 | 333  | 713.59  | 1425.17 | 1424.81 | 56.10 | 0.0024  | LDVAPISDIEIK             |
| 237 | gj 41053746  | RNA binding protein with multiple splicing 2 [Danio rerio]   | 45.5 | 200  | 772.69  | 1543.36 | 1542.88 | 56.08 | 0.0025  | TLFVSGLPDIDKPR           |
| 238 | gj 56790313  | homeo box B9a [Danio rerio]                                  | 14.1 | 255  | 710.16  | 1418.30 | 1416.74 | 55.87 | 0.0027  | MEPLLGHLGEPK             |
| 239 | gj 44917595  | alcohol dehydrogenase 8b [Danio rerio]                       | 61.2 | 376  | 966.09  | 2895.25 | 2894.48 | 55.82 | 0.0017  | GFPTILGHEAAGVVESVGPVTH   |
| 240 | gj 154707842 | methylmalonyl Coenzyme A mutase [Danio rerio]                | 39.5 | 757  | 786.15  | 1570.29 | 1568.84 | 47.95 | 0.016   | NTQIIIQEESEGIPK          |
|     |              |                                                              |      |      | 976.35  | 1950.69 | 1948.02 | 44.18 | 0.032   | TPEGISIKPVYTQTDATAK      |
| 241 | gj 62955301  | hypothetical protein LOC550355 [Danio rerio]                 | 39.6 | 255  | 925.67  | 1849.32 | 1848.92 | 55.56 | 0.0025  | VLPQVDVTVGHEEEQGGK       |
| 242 | gj 68438153  | PREDICTED: similar to predicted protein [Danio rerio]        | 60.5 | 124  | 872.20  | 1742.39 | 1742.81 | 55.55 | 0.0027  | AMGIMNSFVNDIFER          |
| 243 | gj 41152402  | histone 2, H2, like [Danio rerio]                            | 35.7 | 126  | 872.20  | 1742.39 | 1742.81 | 55.55 | 0.0027  | AMGIMNSFVNDIFER          |
| 244 | gj 56693297  | hypothetical protein LOC494070 [Danio rerio]                 | 45.1 | 182  | 952.62  | 1903.22 | 1902.91 | 55.04 | 0.0028  | AKEELEQELADKEDEK         |



|     |              |                                                           |      |      |         |         |         |       |        |                          |
|-----|--------------|-----------------------------------------------------------|------|------|---------|---------|---------|-------|--------|--------------------------|
| 245 | gi 51467909  | ATP synthase, H+ transporting, mitochondrial F1 comple:   | 58.4 | 209  | 920.66  | 1839.30 | 1838.03 | 54.42 | 0.0032 | VSPITINLINVLSENGR        |
| 246 | gi 83523754  | chimera galectin Gal3 [Danio rerio]                       | 18.4 | 228  | 705.77  | 1409.53 | 1408.73 | 54.11 | 0.0037 | RGNDIAFHINPR             |
| 247 | gi 50539806  | hypothetical protein LOC436642 [Danio rerio]              | 23.5 | 323  | 976.35  | 1950.69 | 1950.01 | 53.72 | 0.0036 | ALESAYGSEKPSLTSAAIR      |
| 248 | gi 66472400  | NADH dehydrogenase (ubiquinone) Fe-S protein 4, (NAC      | 48.2 | 168  | 827.09  | 1652.17 | 1650.88 | 53.50 | 0.0041 | LDISTLTGVPEEHIK          |
| 249 | gi 125995404 | DEAD (Asp-Glu-Ala-Asp) box polypeptide 3 [Danio rerio]    | 55   | 709  | 695.11  | 2082.30 | 2082.02 | 53.31 | 0.0038 | HVINFDLPSDIEEYVHR        |
| 250 | gi 41282082  | p110 [Danio rerio]                                        | 50.3 | 688  | 695.11  | 2082.30 | 2082.02 | 53.31 | 0.0038 | HVINFDLPSDIEEYVHR        |
| 251 | gi 55742591  | telomerase binding protein, p23 [Danio rerio]             | 20.8 | 159  | 974.86  | 1947.70 | 1944.92 | 53.01 | 0.0043 | HHNEVDLLEAIDPNDSK        |
| 252 | gi 55926092  | heat shock 10kD protein 1 (chaperonin 10) [Danio rerio]   | 65   | 100  | 770.78  | 1539.54 | 1539.86 | 52.40 | 0.0055 | VLQATVVAVGPGSTNK         |
| 253 | gi 125842393 | PREDICTED: zgc:103738 [Danio rerio]                       | 36.4 | 77   | 987.76  | 2960.25 | 2961.35 | 52.44 | 0.0034 | TLSAGSHAEHEGKPYCNNPCY/   |
| 254 | gi 52218912  | enoyl Coenzyme A hydratase, short chain, 1, mitochondr    | 43   | 291  | 1056.69 | 2111.36 | 2110.12 | 52.29 | 0.005  | AQFGQPEILLGTIPGAGGTQR    |
| 255 | gi 189532637 | PREDICTED: similar to Calcium-binding mitochondrial ca    | 26.9 | 774  | 622.59  | 1243.16 | 1240.68 | 51.93 | 0.0073 | LQVAGEITTGPR             |
| 256 | gi 30410758  | keratin 18 [Danio rerio]                                  | 73.8 | 431  | 1000.00 | 1997.99 | 1998.02 | 51.86 | 0.0055 | GNIQHQTQEYEALLNIK        |
| 257 | gi 27545251  | solute carrier family 25 alpha, member 5 [Danio rerio]    | 49.7 | 298  | 617.63  | 1233.24 | 1232.68 | 51.16 | 0.0084 | DFLAGGIAAAISK            |
| 258 | gi 167621510 | hypothetical protein LOC100136853 [Danio rerio]           | 31.6 | 424  | 654.89  | 1307.76 | 1306.71 | 46.23 | 0.023  | KNSSSLKSTIDK             |
|     |              |                                                           |      |      | 655.46  | 1308.91 | 1306.71 | 47.37 | 0.018  | KNSSSLKSTIDK             |
| 259 | gi 68357456  | PREDICTED: similar to mCG1046517 [Danio rerio]            | 46.1 | 1561 | 766.34  | 1530.67 | 1530.94 | 47.44 | 0.018  | LLEKSKELAFILK            |
| 260 | gi 59933260  | cardiomyopathy associated 1 [Danio rerio]                 | 49.8 | 2297 | 915.95  | 1829.89 | 1827.92 | 51.47 | 0.0066 | SHTWLFETQPLDNIK          |
| 261 | gi 53292609  | clathrin, heavy polypeptide a (Hc) [Danio rerio]          | 34.9 | 1680 | 1170.75 | 2339.48 | 2338.23 | 51.37 | 0.0057 | ISGETIFVTAPHDATAGIIGVNR  |
| 262 | gi 57770449  | hypothetical protein LOC393165 isoform 1 [Danio rerio]    | 42.1 | 197  | 1025.69 | 2049.36 | 2049.07 | 51.32 | 0.0062 | KPVLETEVNHVSPLSDASK      |
| 263 | gi 80751159  | hypothetical protein LOC641325 [Danio rerio]              | 46   | 313  | 1296.63 | 2591.25 | 2589.22 | 42.49 | 0.038  | GTKDDPIEPQQAIPDAQSFEFEK  |
| 264 | gi 50344970  | hypothetical protein LOC415247 [Danio rerio]              | 52.1 | 382  | 604.82  | 1207.63 | 1205.69 | 50.73 | 0.0088 | HNNLDLVIIR               |
| 265 | gi 189523865 | PREDICTED: myosin 1b-like 2 [Danio rerio]                 | 46.9 | 1078 | 752.61  | 2254.79 | 2255.13 | 46.51 | 0.019  | SLRHQDKDQCILITGESGAGK    |
| 266 | gi 18858981  | lamin b2 [Danio rerio]                                    | 66.2 | 583  | 545.21  | 1088.41 | 1087.55 | 50.59 | 0.011  | KLLEGEEDR                |
| 267 | gi 125849603 | PREDICTED: similar to keratin 8 [Danio rerio]             | 41.8 | 438  | 545.21  | 1088.41 | 1087.55 | 50.59 | 0.011  | KLLEGEEDR                |
| 268 | gi 157743314 | NADH dehydrogenase (ubiquinone) 1 beta subcomplex 5       | 33.3 | 186  | 866.17  | 1730.33 | 1729.87 | 50.53 | 0.0086 | EKGDPWFQIPTIDK           |
| 269 | gi 50540060  | ubiquinol-cytochrome c reductase, complex III subunit VII | 76.8 | 82   | 915.14  | 2742.38 | 2740.48 | 50.26 | 0.0063 | GLHFGNLAKVRHVITYSISPFEQ  |
| 270 | gi 68448495  | hypothetical protein LOC100003906 isoform 1 [Danio reri   | 29.6 | 915  | 1373.97 | 4118.89 | 4117.98 | 50.23 | 0.0034 | SGTPGFSHHHYTTNSGQPGLH/   |
| 271 | gi 37497110  | ribophorin I [Danio rerio]                                | 40   | 598  | 813.09  | 2436.23 | 2435.30 | 50.20 | 0.0069 | VETVFSHVLKPFPTHITQAER    |
| 272 | gi 189516116 | PREDICTED: similar to ribophorin I [Danio rerio]          | 27.1 | 505  | 813.09  | 2436.23 | 2435.30 | 50.20 | 0.0069 | VETVFSHVLKPFPTHITQAER    |
| 273 | gi 62955727  | NADH dehydrogenase (ubiquinone) 1 beta subcomplex, !      | 19.4 | 175  | 814.41  | 1626.81 | 1625.79 | 50.13 | 0.0095 | EVQQLQSETPADGPK          |
| 274 | gi 54261767  | succinate-CoA ligase, ADP-forming, beta subunit [Danio    | 63.1 | 466  | 1294.16 | 2586.30 | 2585.29 | 50.09 | 0.0067 | LHGGTPANFLDVGGGATAQQV    |
| 275 | gi 68379126  | PREDICTED: hypothetical protein LOC767664 [Danio rer      | 74.1 | 81   | 1494.87 | 1493.86 | 1493.82 | 50.07 | 0.0092 | IFLEDNGLPVHIK            |
| 276 | gi 112363126 | dynein, cytoplasmic 1, heavy chain 1 [Danio rerio]        | 33.7 | 4643 | 843.40  | 2527.16 | 2526.32 | 49.04 | 0.0088 | VLRPQVSAVPQHAQGESAEPAI   |
| 277 | gi 189533132 | PREDICTED: A kinase anchor protein 12 [Danio rerio]       | 27.5 | 1533 | 1075.96 | 3224.86 | 3224.59 | 48.92 | 0.0074 | QSSVIVQEIIQNVVENFAEAHGE  |
| 278 | gi 61806580  | hypothetical protein LOC541378 [Danio rerio]              | 57.1 | 448  | 780.37  | 1558.73 | 1557.89 | 48.92 | 0.013  | LLEVIDGHIPLPSR           |
| 279 | gi 47087201  | RIO kinase 2 [Danio rerio]                                | 16.8 | 512  | 896.26  | 1790.51 | 1790.03 | 47.93 | 0.016  | NHEIVPVSLIASIASLK        |
| 280 | gi 189545630 | PREDICTED: hypothetical protein [Danio rerio]             | 28   | 403  | 1429.65 | 1428.64 | 1427.78 | 47.74 | 0.017  | LYEVFIKNFQK              |
| 281 | gi 160333682 | heat shock protein 8 [Danio rerio]                        | 35.7 | 649  | 1131.27 | 2260.52 | 2259.14 | 47.51 | 0.014  | SINPDEAVAYGAAVQAAILSGDK  |
| 282 | gi 130494136 | ubiquitin-conjugating enzyme E2L 3, like [Danio rerio]    | 70   | 190  | 828.62  | 2482.83 | 2482.32 | 47.47 | 0.013  | TDQVIQSLIALVNDPQPEHPLR   |
| 283 | gi 57222259  | talin 1 [Danio rerio]                                     | 46.9 | 2538 | 1059.58 | 3175.71 | 3174.57 | 47.34 | 0.011  | EAVDDLGSTLAEVASAAGAVGG   |
| 284 | gi 55925219  | sorting and assembly machinery component 50 homolog,      | 38.8 | 469  | 768.63  | 1535.24 | 1533.83 | 47.24 | 0.018  | DVVVQHVNIIEGLGR          |
| 285 | gi 189537996 | PREDICTED: similar to sorting and assembly machinery      | 42.8 | 201  | 768.63  | 1535.24 | 1533.83 | 47.24 | 0.018  | DVVVQHVNIIEGLGR          |
| 286 | gi 47086623  | monocarboxylate transporter 4 [Danio rerio]               | 65   | 508  | 946.72  | 1891.42 | 1889.91 | 47.08 | 0.017  | ELESIEVDSIEVENASK        |
| 287 | gi 50539996  | peroxiredoxin 2 [Danio rerio]                             | 84.8 | 197  | 922.51  | 2764.51 | 2762.45 | 47.00 | 0.013  | KIGVELIAASTDSHFSHLAWINTF |
| 288 | gi 125814831 | PREDICTED: similar to zinc finger protein 585B [Danio re  | 51.7 | 298  | 838.32  | 1674.63 | 1672.88 | 46.69 | 0.021  | EESEDVKIEEIIK            |
| 289 | gi 189527553 | PREDICTED: hypothetical protein LOC553434 [Danio rer      | 47.2 | 568  | 481.06  | 960.10  | 958.59  | 46.63 | 0.028  | FVIKPIDK                 |
| 290 | gi 71892458  | villin 2 [Danio rerio]                                    | 40   | 583  | 481.06  | 960.10  | 958.59  | 46.63 | 0.028  | FVIKPIDK                 |
| 291 | gi 125833577 | PREDICTED: similar to Galectin-3 (Galactose-specific lect | 15.5 | 368  | 670.74  | 1339.46 | 1337.66 | 46.62 | 0.021  | GHEVVFFHFNPR             |
| 292 | gi 189519969 | PREDICTED: myosin, heavy polypeptide 10, non-muscle       | 43.3 | 1973 | 580.54  | 1738.58 | 1737.89 | 46.55 | 0.021  | KQELEEILHDLESR           |
| 293 | gi 189519965 | PREDICTED: similar to nonmuscle myosin heavy chain [I     | 43.5 | 1857 | 580.54  | 1738.58 | 1737.89 | 46.55 | 0.021  | KQELEEILHDLESR           |
| 294 | gi 61651682  | fibronectin 1b [Danio rerio]                              | 40.9 | 2408 | 806.73  | 2417.17 | 2416.31 | 46.22 | 0.018  | SAPLVGTATTQLISGLPSLPSHG  |
| 295 | gi 125832496 | PREDICTED: similar to mCG2694 [Danio rerio]               | 64.3 | 308  | 550.57  | 1099.13 | 1098.61 | 44.93 | 0.037  | QLADALKANR               |



|     |              |                                                                              |      |      |         |         |         |       |       |                          |
|-----|--------------|------------------------------------------------------------------------------|------|------|---------|---------|---------|-------|-------|--------------------------|
| 296 | gi 189523776 | PREDICTED: hypothetical protein LOC798920 isoform 1                          | 74   | 265  | 685.11  | 1368.20 | 1367.61 | 45.43 | 0.027 | TRMYNTQDDPK              |
| 297 | gi 50233897  | FLJ12716-like protein [Danio rerio]                                          | 29.8 | 1132 | 596.22  | 1190.42 | 1187.63 | 45.26 | 0.034 | TAYSLVHELK               |
| 298 | gi 73611922  | histone 2, H2a [Danio rerio]                                                 | 60.2 | 128  | 972.56  | 2914.65 | 2914.58 | 45.22 | 0.019 | VGAGAPVYLAHVLEYLTAIELEL  |
| 299 | gi 41055102  | H2A histone family, member X [Danio rerio]                                   | 60.6 | 142  | 972.56  | 2914.65 | 2914.58 | 45.22 | 0.019 | VGAGAPVYLAHVLEYLTAIELEL  |
| 300 | gi 21426835  | glucose phosphate isomerase a [Danio rerio]                                  | 15   | 553  | 593.18  | 1184.34 | 1183.63 | 45.16 | 0.033 | HFVALSTNAPK              |
| 301 | gi 189525785 | PREDICTED: similar to AT rich interactive domain 5B (M                       | 31.1 | 935  | 673.32  | 1344.62 | 1344.72 | 45.14 | 0.032 | KQEGSVQESIHK             |
| 302 | gi 61806508  | signal peptidase complex subunit 2 homolog [Danio rerio]                     | 48.3 | 201  | 650.50  | 1298.98 | 1299.73 | 45.04 | 0.032 | AARNGKNSILEK             |
| 303 | gi 189523571 | PREDICTED: similar to mcf.2 transforming sequence-like                       | 30.5 | 929  | 889.20  | 1776.39 | 1774.95 | 44.83 | 0.033 | ESSPLFAADVITELKR         |
| 304 | gi 125850307 | PREDICTED: CFH protein [Danio rerio]                                         | 63.1 | 751  | 1101.66 | 2201.30 | 2200.96 | 44.39 | 0.031 | DDITYENVEPVSEASYADGK     |
| 305 | gi 189528635 | PREDICTED: similar to odorant receptor [Danio rerio]                         | 4.6  | 305  | 797.72  | 1593.43 | 1591.89 | 44.35 | 0.035 | LLTDLLSDTHLVPR           |
| 306 | gi 125843259 | PREDICTED: polymerase (RNA) III (DNA directed) polyp                         | 44.7 | 1130 | 585.65  | 1169.29 | 1169.70 | 44.34 | 0.039 | VILIQEQLSK               |
| 307 | gi 131888959 | hypothetical protein LOC100034538 [Danio rerio]                              | 21.9 | 448  | 710.11  | 1418.20 | 1415.74 | 44.34 | 0.038 | EALGAENIQSTKR            |
| 308 | gi 47085781  | ubiquitin-like modifier activating enzyme 1 [Danio rerio]                    | 37.1 | 1058 | 733.03  | 2196.05 | 2196.12 | 44.01 | 0.033 | FDRPGQLHVGFGALHAFEK      |
| 309 | gi 189526852 | PREDICTED: similar to G2/M-phase specific E3 ubiquitin                       | 43   | 762  | 898.52  | 1795.02 | 1794.80 | 44.16 | 0.035 | SNMEFAINNTHGFGKE         |
| 310 | gi 50344798  | ubiquitin-conjugating enzyme E2L 3 [Danio rerio]                             | 53.2 | 154  | 828.62  | 2482.83 | 2482.32 | 47.47 | 0.013 | TDQVIQSLIALVNDPQPEHPLR   |
| 311 | gi 189532554 | PREDICTED: similar to karyopherin alpha 6 (importin alp                      | 33.9 | 537  | 609.19  | 1216.37 | 1216.62 | 44.01 | 0.046 | NKALNLEEMR               |
| 312 | gi 52219050  | hypothetical protein LOC447859 [Danio rerio]                                 | 41.7 | 617  | 928.92  | 2783.72 | 2782.39 | 43.84 | 0.028 | ITDENLQSQTTGLYIPEYEEALKI |
| 313 | gi 47086477  | ribosomal protein L13a [Danio rerio]                                         | 39   | 205  | 634.75  | 1267.49 | 1265.65 | 43.73 | 0.042 | YQAITATLEEK              |
| 314 | gi 189517523 | PREDICTED: hypothetical protein [Danio rerio]                                | 66   | 147  | 713.74  | 1425.46 | 1424.76 | 43.62 | 0.042 | INVDEIGPQTLAR            |
| 315 | gi 121583897 | hypothetical protein LOC562692 [Danio rerio]                                 | 46.6 | 384  | 816.81  | 1631.60 | 1631.81 | 43.59 | 0.045 | ELEEKVAMLEAENK           |
| 316 | gi 50539832  | lysyl-tRNA synthetase [Danio rerio]                                          | 28.1 | 602  | 750.82  | 2249.44 | 2247.14 | 43.46 | 0.037 | YNHLQPGDHLTDVVLNLSGR     |
| 317 | gi 52218992  | hypothetical protein LOC447834 [Danio rerio]                                 | 48.8 | 248  | 662.36  | 1322.70 | 1321.71 | 43.45 | 0.044 | TLLGGGGVDGAIHR           |
| 318 | gi 189536881 | PREDICTED: hypothetical protein LOC402880 [Danio rerio]                      | 28.3 | 173  | 684.43  | 1366.84 | 1367.74 | 43.41 | 0.044 | LDTPLPDVPFVR             |
| 319 | gi 189541652 | PREDICTED: similar to Myosin-3 (Myosin heavy chain 3)                        | 40.6 | 882  | 659.27  | 1316.53 | 1315.65 | 43.35 | 0.049 | ELELELDAEQK              |
| 320 | gi 189531190 | PREDICTED: im:7145859 isoform 1 [Danio rerio]                                | 38.3 | 677  | 1052.47 | 2102.92 | 2102.03 | 42.90 | 0.044 | EVDEVDAALSLEITLEGGK      |
| 321 | gi 57525959  | BCL2-associated athanogene 3 [Danio rerio]                                   | 20   | 459  | 1015.59 | 3043.75 | 3041.54 | 42.71 | 0.031 | VSEVPQQIHHQPVQQQQPTQ     |
| 322 | gi 62955581  | hypothetical protein LOC550502 [Danio rerio]                                 | 50.8 | 455  | 1113.39 | 2224.76 | 2224.07 | 42.61 | 0.045 | AHIVFDFHQAVDGVQEQER      |
| 323 | gi 136256027 | phosphorylase, glycogen; brain [Danio rerio]                                 | 33.9 | 843  | 953.65  | 1905.28 | 1905.00 | 42.55 | 0.049 | LITSVGEVVNHDPVVGDR       |
| 324 | gi 41055708  | proteasome (prosome, macropain) 26S subunit, non-ATF                         | 31.4 | 503  | 1294.90 | 2587.79 | 2586.35 | 42.35 | 0.04  | EFLLGFLQVPEIEGDVPFRPR    |
| 325 | gi 41053395  | glutamate oxaloacetate transaminase 2 [Danio rerio]                          | 47   | 428  | 998.97  | 1995.92 | 1994.03 | 41.92 | 0.054 | YFIEQGHNILLSQSFAK        |
| 326 | gi 52219194  | fatty acid binding protein 11 [Danio rerio]                                  | 64.2 | 134  | 769.63  | 1537.24 | 1535.67 | 41.74 | 0.063 | LNEPFEETTADDR            |
| 327 | gi 131889079 | hypothetical protein LOC100034487 [Danio rerio]                              | 60.5 | 850  | 544.27  | 543.26  | 543.31  | 41.53 | 0.034 | INAAR                    |
| 328 | gi 39752649  | kelch repeat and BTB (POZ) domain containing 10 [Danio rerio]                | 28.1 | 605  | 544.27  | 543.26  | 543.31  | 41.53 | 0.034 | LNAAR                    |
| 329 | gi 28201964  | erythrocyte membrane protein band 4.1 (elliptocytosis 1, ELP1) [Danio rerio] | 28.6 | 1534 | 583.60  | 1165.19 | 1164.71 | 41.44 | 0.071 | IELVLPEKPK               |
| 330 | gi 189536521 | PREDICTED: similar to phosphofructokinase, platelet [Danio rerio]            | 50.4 | 789  | 1115.74 | 2229.46 | 2229.10 | 41.20 | 0.062 | TSYDVSDSGQLHVVVNRPK      |

#### TCDD replicate 2

| Protein # | Accession ID | Protein name                                      | Protein coverage | length | peptide m/z | peptide Mr <sub>expt</sub> | peptide Mr <sub>calc</sub> | peptide score | pep_expect | peptide sequence        |
|-----------|--------------|---------------------------------------------------|------------------|--------|-------------|----------------------------|----------------------------|---------------|------------|-------------------------|
| 1         | gi 41053652  | myoglobin [Danio rerio]                           | 100              | 147    | 550.49      | 1098.97                    | 1098.58                    | 69.68         | 0.00012    | AGLDAAGQGALR            |
|           |              |                                                   |                  |        | 780.21      | 1558.40                    | 1557.74                    | 111.12        | 7.70E-09   | VMDAVIGDIDGYYK          |
|           |              |                                                   |                  |        | 1010.42     | 2018.82                    | 2020.10                    | 106.78        | 1.80E-08   | GDHAALLKPLANTHANIHK     |
|           |              |                                                   |                  |        | 1110.91     | 2219.80                    | 2219.23                    | 91.96         | 5.10E-07   | AKGDHAALLKPLANTHANIHK   |
|           |              |                                                   |                  |        | 1128.60     | 2255.18                    | 2253.18                    | 112.98        | 4.10E-09   | FSGISQGLAGSPAVAAHGATV   |
|           |              |                                                   |                  |        | 946.49      | 2836.43                    | 2834.54                    | 64.80         | 0.00021    | GDHAALLKPLANTHANIHKVALN |
|           |              |                                                   |                  |        | 1012.59     | 3034.75                    | 3033.67                    | 57.28         | 0.0011     | AKGDHAALLKPLANTHANIHKVA |
|           |              |                                                   |                  |        | 496.09      | 990.16                     | 989.50                     | 39.61         | 0.13       | SNNFQKPR                |
| 2         | gi 163644263 | ventricular myosin heavy chain-like [Danio rerio] | 53.6             | 1936   | 1180.66     | 1179.65                    | 1179.58                    | 47.68         | 0.017      | DFEISQLNSK              |
|           |              |                                                   |                  |        | 609.19      | 1216.37                    | 1215.63                    | 54.25         | 0.0044     | AGLLGQLEEMR             |
|           |              |                                                   |                  |        | 1224.67     | 1223.66                    | 1223.61                    | 43.14         | 0.046      | TKYETDAIQR              |
|           |              |                                                   |                  |        | 621.00      | 1239.98                    | 1237.63                    | 51.96         | 0.0063     | EADVLQQNPPK             |
|           |              |                                                   |                  |        |             |                            |                            |               |            |                         |

|         |         |         |        |          |                       |
|---------|---------|---------|--------|----------|-----------------------|
| 641.99  | 1281.96 | 1281.54 | 41.73  | 0.067    | EQYEEEQEAK            |
| 643.04  | 1284.06 | 1282.57 | 37.91  | 0.16     | ELTYQTEEDR            |
| 645.12  | 1288.22 | 1288.63 | 47.26  | 0.02     | DSQLQLDDSLR           |
| 654.30  | 1306.58 | 1305.58 | 40.69  | 0.088    | ELECEVEAEQK           |
| 655.46  | 1308.91 | 1307.64 | 77.55  | 1.70E-05 | NSFSQQLEDLK           |
| 685.16  | 1368.31 | 1367.63 | 47.57  | 0.017    | LQHELDEAEER           |
| 699.56  | 1397.10 | 1397.75 | 86.37  | 2.20E-06 | NALLQAELEELR          |
| 708.41  | 1414.80 | 1414.73 | 99.51  | 1.20E-07 | LAEQELLDVTER          |
| 733.14  | 1464.26 | 1463.74 | 77.88  | 1.60E-05 | NSFSQQLEDLKR          |
| 738.45  | 1474.89 | 1473.68 | 79.64  | 1.10E-05 | VEELEEELEAER          |
| 748.98  | 1495.95 | 1495.73 | 61.03  | 0.00074  | KLQHELDEAEER          |
| 751.13  | 1500.24 | 1499.75 | 107.00 | 2.00E-08 | LQEAEAVEAVNAK         |
| 752.60  | 1503.19 | 1502.76 | 72.06  | 6.30E-05 | ENQSILITGESGAGK       |
| 1540.74 | 1539.73 | 1539.77 | 67.06  | 0.00019  | DYHIFYQILSNK          |
| 771.81  | 1541.61 | 1541.83 | 41.93  | 0.063    | IDDEQSIIIQLQK         |
| 772.07  | 1542.12 | 1539.77 | 43.86  | 0.041    | DYHIFYQILSNK          |
| 772.48  | 1542.94 | 1542.83 | 83.14  | 4.90E-06 | KLAEQELLDVTER         |
| 772.58  | 1543.15 | 1541.83 | 79.18  | 1.20E-05 | IDDEQSIIIQLQK         |
| 773.18  | 1544.35 | 1542.83 | 89.45  | 1.20E-06 | KLAEQELLDVTER         |
| 778.74  | 1555.46 | 1553.85 | 77.67  | 1.70E-05 | RNALLQAELEELR         |
| 779.46  | 1556.90 | 1556.79 | 66.68  | 0.00021  | LLGSLDIDHQQYR         |
| 802.72  | 1603.42 | 1602.78 | 73.08  | 4.90E-05 | SNDDLKENTAIVER        |
| 806.41  | 1610.80 | 1610.75 | 87.04  | 1.90E-06 | AAEESSEQANVHLGK       |
| 810.75  | 1619.49 | 1620.72 | 57.80  | 0.0016   | LEDEEEMNAELTAK        |
| 816.81  | 1631.60 | 1631.78 | 96.03  | 2.60E-07 | LEEAGGATAAQIEMNK      |
| 825.24  | 1648.47 | 1645.82 | 53.20  | 0.0049   | NLTEEMAALDDIIAK       |
| 843.71  | 1685.41 | 1684.83 | 67.36  | 0.00018  | LELDDVASSMEHIVK       |
| 845.72  | 1689.42 | 1688.88 | 91.16  | 7.80E-07 | GQNVQQVNYAIGALSK      |
| 1713.93 | 1712.92 | 1711.91 | 50.75  | 0.0078   | ILNPAAIPEGQFIDSK      |
| 860.59  | 1719.16 | 1717.85 | 95.23  | 3.00E-07 | NEDPLNETVVGLYQK       |
| 862.60  | 1723.18 | 1721.94 | 75.88  | 2.50E-05 | VQLLHSQNTSLINQK       |
| 895.49  | 1788.97 | 1786.87 | 93.20  | 4.50E-07 | TIDTLQSALESETHSR      |
| 897.20  | 1792.39 | 1790.76 | 52.36  | 0.0056   | QREEQAEADGTEDADK      |
| 931.62  | 1861.22 | 1858.88 | 99.10  | 1.10E-07 | LEQQVDDLEGSLEQEK      |
| 934.83  | 1867.65 | 1867.93 | 118.48 | 1.30E-09 | DLEEATLQHEATAATLR     |
| 943.56  | 1885.10 | 1884.92 | 73.56  | 3.90E-05 | QADSVaelGEQIDNLQR     |
| 979.93  | 1957.84 | 1957.98 | 122.26 | 5.20E-10 | ILQEEISDLTEQLGEGGK    |
| 995.29  | 1988.57 | 1986.97 | 72.80  | 4.40E-05 | LEQQVDDLEGSLEQEKK     |
| 1021.70 | 2041.38 | 2040.98 | 102.96 | 4.30E-08 | LLSNLFANYAGADSATGDGGK |
| 1044.21 | 2086.41 | 2086.04 | 81.55  | 5.80E-06 | VKLEQQVDDLEGSLEQEK    |
| 1069.85 | 2137.69 | 2139.00 | 132.48 | 4.70E-11 | AEIQAALeeAEGSLEHEEGK  |
| 1099.79 | 2197.57 | 2197.01 | 97.21  | 1.60E-07 | ALQEAHQQTLDLQSEEDK    |
| 1101.39 | 2200.76 | 2199.12 | 103.60 | 3.70E-08 | GTLEDQIIQANPALEAFGNAK |
| 1145.88 | 2289.75 | 2290.10 | 89.15  | 9.70E-07 | LTQESIMDLENDKQQLEEK   |
| 1241.45 | 2480.89 | 2481.17 | 111.86 | 4.70E-09 | KLETDLsqFQTEVEEAVQECR |
| 1117.39 | 1116.38 | 1114.56 | 42.40  | 0.07     | ADEIGAEALAR           |
| 588.76  | 1175.51 | 1175.62 | 78.14  | 1.80E-05 | TIMGAVGEAISK          |
| 684.64  | 1367.27 | 1365.73 | 80.52  | 8.50E-06 | FFNNLALALSEK          |
| 932.23  | 1862.44 | 1863.88 | 119.89 | 9.30E-10 | TYFSHWSDLSPGSGPVK     |
| 934.14  | 1866.26 | 1868.00 | 104.77 | 3.00E-08 | IDDLVGGLAALSELHAFK    |
| 934.17  | 1866.32 | 1863.88 | 96.10  | 2.20E-07 | TYFSHWSDLSPGSGPVK     |
| 934.23  | 1866.44 | 1868.00 | 116.08 | 2.20E-09 | IDDLVGGLAALSELHAFK    |

3 gj|74315904 alpha globin-like [Danio rerio]

67.8 143

|   |              |                                                                  |      |        |         |         |         |          |                                  |
|---|--------------|------------------------------------------------------------------|------|--------|---------|---------|---------|----------|----------------------------------|
|   |              |                                                                  |      | 934.30 | 1866.58 | 1863.88 | 93.17   | 4.40E-07 | TYFSHWSDLSPGSGPVK                |
|   |              |                                                                  |      | 934.46 | 1866.90 | 1868.00 | 133.85  | 3.70E-11 | IDDLVGGLAALSELHAFK               |
|   |              |                                                                  |      | 998.22 | 1994.42 | 1991.97 | 69.02   | 0.00011  | TYFSHWSDLSPGSGPVKK               |
| 4 | gj 47271417  | hemoglobin alpha adult-1 [Danio rerio]                           | 67.8 | 143    | 1117.39 | 1116.38 | 1114.56 | 42.40    | 0.07 ADEIGAEALAR                 |
|   |              |                                                                  |      |        | 582.09  | 1162.17 | 1161.61 | 80.71    | 9.20E-06 TIMGAVGEAVSK            |
|   |              |                                                                  |      |        | 684.64  | 1367.27 | 1365.73 | 80.52    | 8.50E-06 FFNNLALALSEK            |
|   |              |                                                                  |      |        | 924.26  | 1846.50 | 1847.88 | 123.11   | 4.40E-10 TYFSHWADLSPGSGPVK       |
|   |              |                                                                  |      |        | 934.46  | 1866.90 | 1868.00 | 133.85   | 3.70E-11 IDDLVGGLAALSELHAFK      |
| 5 | gj 169403947 | glyceraldehyde-3-phosphate dehydrogenase [Danio rerio]           | 79.3 | 333    | 748.67  | 1495.33 | 1494.84 | 73.96    | 3.80E-05 VPTPNVSVVDLTVR          |
|   |              |                                                                  |      |        | 787.22  | 1572.42 | 1571.83 | 87.49    | 1.80E-06 LVIDGHAITVYSER          |
|   |              |                                                                  |      |        | 882.65  | 1763.28 | 1762.80 | 54.62    | 0.0034 LVTWYDNEFGYSNR            |
|   |              |                                                                  |      |        | 931.70  | 1861.39 | 1860.94 | 91.36    | 6.60E-07 SSIFDAGAGIALNDHFVK      |
|   |              |                                                                  |      |        | 1105.92 | 2209.83 | 2210.17 | 74.16    | 3.10E-05 LVIDGHAITVYSERDPANIK    |
|   |              |                                                                  |      |        | 1117.33 | 2232.65 | 2230.08 | 125.99   | 2.00E-10 WGDAGATYVVESTGVFTTIEK   |
|   |              |                                                                  |      |        | 1301.14 | 2600.27 | 2599.37 | 90.28    | 6.60E-07 VINDNFVIVEGLMSTVHAITATQ |
| 6 | gj 38488753  | myosin, heavy polypeptide 6, cardiac muscle, alpha [Danio rerio] | 46.9 | 1936   | 602.49  | 1202.96 | 1202.57 | 64.97    | 0.00035 DGDVHPQNPPK              |
|   |              |                                                                  |      |        | 659.27  | 1316.53 | 1316.61 | 44.94    | 0.034 ELENELDAEQK                |
|   |              |                                                                  |      |        | 671.85  | 1341.68 | 1341.65 | 84.88    | 3.20E-06 AFDVLGFTSEEK            |
|   |              |                                                                  |      |        | 1375.67 | 1374.66 | 1374.66 | 66.79    | 0.00022 LAEQELTDATER             |
|   |              |                                                                  |      |        | 702.67  | 1403.32 | 1403.72 | 76.66    | 2.30E-05 KDFEINQLNQR             |
|   |              |                                                                  |      |        | 737.76  | 1473.50 | 1473.68 | 50.23    | 0.0097 IEELEEEELDAER             |
|   |              |                                                                  |      |        | 742.19  | 1482.37 | 1480.77 | 58.83    | 0.0012 LSSADIETYLLEK             |
|   |              |                                                                  |      |        | 755.38  | 1508.74 | 1509.74 | 59.37    | 0.0011 KLQHELEEEAER              |
|   |              |                                                                  |      |        | 774.42  | 1546.82 | 1546.71 | 67.01    | 0.0002 SAEAAEELANANTAK           |
|   |              |                                                                  |      |        | 794.15  | 1586.29 | 1585.79 | 48.54    | 0.014 IRELENELDAEQK              |
|   |              |                                                                  |      |        | 795.70  | 1589.38 | 1588.75 | 98.08    | 1.50E-07 IEDEEEINADLTAK          |
|   |              |                                                                  |      |        | 809.11  | 1616.20 | 1615.81 | 111.35   | 7.20E-09 LEEAGGATSAQVELNK        |
|   |              |                                                                  |      |        | 846.60  | 1691.19 | 1690.81 | 85.65    | 2.80E-06 NSYEETLDHLETIK          |
|   |              |                                                                  |      |        | 860.59  | 1719.16 | 1716.90 | 95.15    | 3.00E-07 NKDPLNETVVGLYQK         |
|   |              |                                                                  |      |        | 862.98  | 1723.94 | 1723.90 | 72.40    | 5.40E-05 MQLLHSQNTGLINQK         |
|   |              |                                                                  |      |        | 1744.97 | 1743.96 | 1742.92 | 44.84    | 0.031 ILNASAIPEGQFIENK           |
|   |              |                                                                  |      |        | 931.62  | 1861.22 | 1858.88 | 99.10    | 1.10E-07 LEQQVDDLEGSLEQEK        |
|   |              |                                                                  |      |        | 950.87  | 1899.73 | 1899.92 | 88.36    | 1.30E-06 DLEESTLQHEATTASLR       |
|   |              |                                                                  |      |        | 967.26  | 1932.50 | 1931.91 | 114.53   | 3.00E-09 NLQEEISDLTDQVSEGR       |
|   |              |                                                                  |      |        | 995.29  | 1988.57 | 1986.97 | 72.80    | 4.40E-05 LEQQVDDLEGSLEQEKK       |
|   |              |                                                                  |      |        | 1029.23 | 2056.45 | 2056.02 | 50.36    | 0.0077 RDLEESTLQHEATTASLR        |
|   |              |                                                                  |      |        | 1044.21 | 2086.41 | 2086.04 | 81.55    | 5.80E-06 VKLEQQVDDLEGSLEQEK      |
|   |              |                                                                  |      |        | 1086.81 | 2171.61 | 2170.99 | 90.81    | 6.80E-07 TELQSALEEADASVEHEEGK    |
|   |              |                                                                  |      |        | 1099.79 | 2197.57 | 2197.01 | 97.21    | 1.60E-07 ALQEAHQQTLDLQSEEDK      |
|   |              |                                                                  |      |        | 1101.39 | 2200.76 | 2199.12 | 103.60   | 3.70E-08 GTLEDQIIQANPALEAFGNAK   |
|   |              |                                                                  |      |        | 1145.86 | 2289.71 | 2289.08 | 53.91    | 0.0032 LTQENVMDLENDKQQLEDK       |
|   |              |                                                                  |      |        | 1158.89 | 2315.76 | 2316.11 | 145.85   | 2.10E-12 NDLLLQVQSEQDTLTDAEER    |
|   |              |                                                                  |      |        | 1278.37 | 2554.72 | 2554.29 | 64.17    | 0.00027 KQESDLLQLQNELEELVQENR    |
|   |              |                                                                  |      |        | 1341.94 | 2681.86 | 2682.38 | 81.75    | 4.50E-06 KKQESDLLQLQNELEELVQENR  |
|   |              |                                                                  |      |        | 1427.49 | 2852.97 | 2853.40 | 96.93    | 1.30E-07 ALQEAHQQTLDLQSEEDKVNT   |
| 7 | gj 51592073  | actin, alpha, cardiac muscle 1 like [Danio rerio]                | 57   | 377    | 489.47  | 976.93  | 975.44  | 36.02    | 0.29 AGFAGDDAPR                  |
|   |              |                                                                  |      |        | 600.05  | 1198.08 | 1197.51 | 75.20    | 3.20E-05 DSYVGDEAQS              |
|   |              |                                                                  |      |        | 895.36  | 1788.71 | 1789.88 | 109.27   | 1.10E-08 SYELPDGQVITIGNER        |
|   |              |                                                                  |      |        | 977.68  | 1953.34 | 1955.04 | 80.29    | 8.00E-06 VAPEEHPTLLTEAPLNPK      |
|   |              |                                                                  |      |        | 1114.80 | 2227.58 | 2227.06 | 62.75    | 0.00044 DLYANNVLSGGTTMYPGIADR    |
| 8 | gj 62955473  | hypothetical protein LOC550445 [Danio rerio]                     | 50.7 | 377    | 489.47  | 976.93  | 975.44  | 36.02    | 0.29 AGFAGDDAPR                  |
|   |              |                                                                  |      |        | 600.05  | 1198.08 | 1197.51 | 75.20    | 3.20E-05 DSYVGDEAQS              |

|    |              |                                                         |      |         |         |         |         |          |                       |                          |
|----|--------------|---------------------------------------------------------|------|---------|---------|---------|---------|----------|-----------------------|--------------------------|
|    |              |                                                         |      | 895.36  | 1788.71 | 1789.88 | 109.27  | 1.10E-08 | SYELPDGQVITIGNER      |                          |
|    |              |                                                         |      | 977.68  | 1953.34 | 1955.04 | 80.29   | 8.00E-06 | VAPEEHPTLLTEAPLNPK    |                          |
|    |              |                                                         |      | 1114.80 | 2227.58 | 2227.06 | 62.75   | 0.00044  | DLYANNVLSGGTTMYPGIADR |                          |
| 9  | gj 163644331 | ventricular myosin heavy chain [Danio rerio]            | 53.4 | 1938    | 496.09  | 990.16  | 989.50  | 39.61    | 0.13                  | SNNFQKPR                 |
|    |              |                                                         |      |         | 609.19  | 1216.37 | 1215.63 | 54.25    | 0.0044                | AGLLGQLEEMR              |
|    |              |                                                         |      |         | 1224.67 | 1223.66 | 1223.61 | 43.14    | 0.046                 | TKYETDAIQR               |
|    |              |                                                         |      |         | 641.99  | 1281.96 | 1281.54 | 41.73    | 0.067                 | EQYEEEQEAK               |
|    |              |                                                         |      |         | 643.04  | 1284.06 | 1282.57 | 37.91    | 0.16                  | ELTYQTEEDR               |
|    |              |                                                         |      |         | 685.16  | 1368.31 | 1367.63 | 47.57    | 0.017                 | IQHELDEAEER              |
|    |              |                                                         |      |         | 748.98  | 1495.95 | 1495.73 | 61.03    | 0.00074               | KIQHELDEAEER             |
|    |              |                                                         |      |         | 752.60  | 1503.19 | 1502.76 | 72.06    | 6.30E-05              | ENQSILITGESGAGK          |
|    |              |                                                         |      |         | 810.75  | 1619.49 | 1620.72 | 57.80    | 0.0016                | LEDEEEMNAELTAK           |
|    |              |                                                         |      |         | 816.81  | 1631.60 | 1631.78 | 96.03    | 2.60E-07              | LEEAGGATAAQIEMNK         |
|    |              |                                                         |      |         | 825.24  | 1648.47 | 1645.82 | 53.20    | 0.0049                | NLTEEMAALDDIIAK          |
|    |              |                                                         |      |         | 862.60  | 1723.18 | 1721.94 | 75.88    | 2.50E-05              | VQLLHSQNTSLLNQK          |
|    |              |                                                         |      |         | 931.62  | 1861.22 | 1858.88 | 99.10    | 1.10E-07              | LEQQVDDLEGSLEQEK         |
|    |              |                                                         |      |         | 934.83  | 1867.65 | 1867.93 | 118.48   | 1.30E-09              | DLEEATLQHEATAATLR        |
|    |              |                                                         |      |         | 943.56  | 1885.10 | 1884.92 | 73.56    | 3.90E-05              | QADSVaelgeQIDNLQR        |
|    |              |                                                         |      |         | 981.20  | 1960.38 | 1958.94 | 97.52    | 1.50E-07              | NLQEEISDLTEQLGEGGK       |
|    |              |                                                         |      |         | 995.29  | 1988.57 | 1986.97 | 72.80    | 4.40E-05              | LEQQVDDLEGSLEQEKK        |
|    |              |                                                         |      |         | 1094.51 | 2187.00 | 2185.00 | 73.03    | 4.20E-05              | SEIQSALEEAASLEHEEGK      |
|    |              |                                                         |      |         | 1099.79 | 2197.57 | 2197.01 | 97.21    | 1.60E-07              | ALQEAHQQTLDLQSEEDK       |
|    |              |                                                         |      |         | 1101.39 | 2200.76 | 2199.12 | 103.60   | 3.70E-08              | GTLEDQIIQANPALEAFGNAK    |
|    |              |                                                         |      |         | 1165.44 | 2328.86 | 2327.21 | 37.90    | 0.13                  | KGTLEDQIIQANPALEAFGNAK   |
|    |              |                                                         |      |         | 1427.49 | 2852.97 | 2853.40 | 96.93    | 1.30E-07              | ALQEAHQQTLDLQSEEDKVNT    |
| 10 | gj 116325975 | ATP synthase, H+ transporting, mitochondrial F1 comple: | 65.3 | 551     | 1199.65 | 1198.64 | 1196.64 | 38.38    | 0.16                  | VVDALGNPIDGK             |
|    |              |                                                         |      |         | 644.36  | 1286.71 | 1286.69 | 72.45    | 6.20E-05              | HALIYDDLSK               |
|    |              |                                                         |      |         | 650.86  | 1299.70 | 1299.74 | 95.06    | 3.20E-07              | TAIAIDTIINQK             |
|    |              |                                                         |      |         | 682.29  | 1362.56 | 1362.69 | 80.70    | 8.60E-06              | TGTAEVSSILEEK            |
|    |              |                                                         |      |         | 766.34  | 1530.67 | 1530.75 | 131.50   | 7.20E-11              | ILGADTGAELEETGR          |
|    |              |                                                         |      |         | 1031.84 | 2061.66 | 2059.13 | 79.24    | 9.90E-06              | AFLQHVISQHQDLLAAIR       |
|    |              |                                                         |      |         | 1182.76 | 2363.50 | 2364.17 | 82.77    | 4.00E-06              | EVAFAQFGSDLDAATQQLLNR    |
| 11 | gj 55926111  | cardiac myosin light chain-1 [Danio rerio]              | 61.7 | 196     | 757.17  | 1512.33 | 1511.69 | 84.44    | 3.40E-06              | DQGTfEDFVEGLR            |
|    |              |                                                         |      |         | 780.26  | 1558.50 | 1559.82 | 92.64    | 5.40E-07              | KEEAPAPAPVPETPK          |
|    |              |                                                         |      |         | 889.30  | 1776.58 | 1777.85 | 48.44    | 0.014                 | SVPLDFSPDQIEEFR          |
|    |              |                                                         |      |         | 973.35  | 1944.68 | 1944.08 | 96.37    | 1.90E-07              | ALGHNPTNADVLTVLGKPK      |
|    |              |                                                         |      |         | 790.88  | 2369.61 | 2370.23 | 93.88    | 3.20E-07              | KEEAPAPAPVPETPKPEVDLK    |
| 12 | gj 18858329  | ba1 globin [Danio rerio]                                | 93.2 | 148     | 713.59  | 1425.16 | 1424.76 | 91.43    | 7.00E-07              | LNIDEIGPQALSR            |
|    |              |                                                         |      |         | 726.37  | 1450.72 | 1449.69 | 68.09    | 0.00015               | NTYAALSVMHSEK            |
|    |              |                                                         |      |         | 898.52  | 1795.02 | 1794.83 | 130.34   | 8.60E-11              | FGQAGFNADVQEAWQK         |
|    |              |                                                         |      |         | 994.50  | 1986.99 | 1984.97 | 94.14    | 3.30E-07              | YFATFGNLSSPAAIMGNPK      |
| 13 | gj 23097290  | troponin T2, cardiac [Danio rerio]                      | 22.7 | 282     | 609.45  | 1216.89 | 1216.66 | 49.43    | 0.013                 | KEEEEEIISLK              |
|    |              |                                                         |      |         | 672.95  | 1343.88 | 1344.75 | 79.90    | 1.10E-05              | KKEEEEEIISLK             |
|    |              |                                                         |      |         | 855.86  | 1709.71 | 1710.90 | 55.88    | 0.0024                | RKPLDIDNANESALR          |
|    |              |                                                         |      |         | 957.92  | 1913.82 | 1913.95 | 94.24    | 3.30E-07              | DLNELQTLIEAHFESR         |
| 14 | gj 47551317  | enolase 3, (beta, muscle) [Danio rerio]                 | 78.3 | 433     | 687.71  | 1373.40 | 1372.70 | 80.72    | 8.70E-06              | HITGEQLGDLYK             |
|    |              |                                                         |      |         | 719.54  | 1437.06 | 1435.72 | 59.66    | 0.001                 | GNPTVEVDLYTTK            |
|    |              |                                                         |      |         | 1054.07 | 2106.12 | 2104.07 | 111.53   | 6.00E-09              | FTGSVDIQQVGGDDLTVTNPK    |
|    |              |                                                         |      |         | 1060.84 | 2119.67 | 2118.12 | 102.85   | 4.30E-08              | DVILPVPafNVINGGSHAGNK    |
|    |              |                                                         |      |         | 1147.92 | 2293.83 | 2295.13 | 40.61    | 0.067                 | SGETEDTFIADLVVGLCTGQIK   |
|    |              |                                                         |      |         | 1013.17 | 3036.49 | 3037.61 | 62.59    | 0.00033               | HIADLAGNKDVILPVPafNVINGC |
| 15 | gj 18858539  | desmin [Danio rerio]                                    | 62.8 | 473     | 527.61  | 1053.20 | 1052.56 | 39.51    | 0.11                  | KIHEEEIR                 |

|    |              |                                                         |      |         |         |         |         |          |                        |                          |
|----|--------------|---------------------------------------------------------|------|---------|---------|---------|---------|----------|------------------------|--------------------------|
|    |              |                                                         |      | 545.18  | 1088.34 | 1086.57 | 41.12   | 0.096    | VSDLNQAVNK             |                          |
|    |              |                                                         |      | 1254.56 | 1253.55 | 1253.56 | 38.11   | 0.15     | NISEAEDWYK             |                          |
|    |              |                                                         |      | 888.41  | 1774.80 | 1775.91 | 99.92   | 1.00E-07 | FLEQQNSALTVEIER        |                          |
|    |              |                                                         |      | 989.77  | 1977.53 | 1978.97 | 108.45  | 1.20E-08 | LDFNLADAINQDFLNTR      |                          |
|    |              |                                                         |      | 1094.31 | 2186.61 | 2186.00 | 145.27  | 2.50E-12 | TFGSGLGSSIFAGHGSSGSSGS |                          |
| 16 | gj 189525553 | PREDICTED: hypothetical protein LOC336197 [Danio rerio] | 80.7 | 517     | 975.59  | 974.58  | 974.55  | 36.11    | 0.31                   | IGLFGGAGVGK              |
|    |              |                                                         |      |         | 704.65  | 1407.28 | 1405.67 | 96.20    | 2.30E-07               | AHGGYSVFAGVGER           |
|    |              |                                                         |      |         | 1436.69 | 1435.68 | 1434.75 | 46.62    | 0.022                  | FTQAGSEVSALLGR           |
|    |              |                                                         |      |         | 720.70  | 1439.39 | 1438.78 | 77.81    | 1.60E-05               | VALTGLTVAEYFR            |
|    |              |                                                         |      |         | 730.22  | 1458.43 | 1456.83 | 60.63    | 0.00086                | TVLIMELINNVAK            |
|    |              |                                                         |      |         | 839.46  | 1676.91 | 1676.92 | 102.54   | 5.60E-08               | LVLEVAQHLGENTVR          |
|    |              |                                                         |      |         | 961.83  | 1921.65 | 1920.96 | 84.87    | 2.80E-06               | DQEGQDVLLFIDNIFR         |
|    |              |                                                         |      |         | 994.82  | 1987.63 | 1987.03 | 98.94    | 1.10E-07               | AIAELGIYPAVDPLDSTSR      |
|    |              |                                                         |      |         | 1003.42 | 2004.82 | 2004.05 | 79.87    | 8.60E-06               | FLSQPFQVAEVFTGHLGK       |
|    |              |                                                         |      |         | 687.83  | 2060.47 | 2059.99 | 39.81    | 0.087                  | EGNDLYHEMIESGVINLK       |
|    |              |                                                         |      |         | 1330.59 | 2659.17 | 2658.38 | 122.66   | 3.80E-10               | SLQDIIAILGMDELSEEDKLTVAR |
|    |              |                                                         |      |         | 1282.47 | 3844.39 | 3841.97 | 52.51    | 0.0024                 | KGSITSVQAIYVPADDLTDPPA   |
| 17 | gj 189536981 | PREDICTED: similar to slow myosin heavy chain 3 isoform | 48.7 | 1940    | 496.09  | 990.16  | 989.50  | 39.61    | 0.13                   | SNNFQKPR                 |
|    |              |                                                         |      |         | 1182.71 | 1181.70 | 1180.57 | 49.07    | 0.012                  | DFEISQLSSR               |
|    |              |                                                         |      |         | 1224.67 | 1223.66 | 1223.61 | 43.14    | 0.046                  | TKYETDAIQR               |
|    |              |                                                         |      |         | 641.99  | 1281.96 | 1281.54 | 41.73    | 0.067                  | EQYEEEEQAK               |
|    |              |                                                         |      |         | 643.04  | 1284.06 | 1282.57 | 37.91    | 0.16                   | ELTYQTEEDR               |
|    |              |                                                         |      |         | 685.16  | 1368.31 | 1367.63 | 47.57    | 0.017                  | LQHELDEAEER              |
|    |              |                                                         |      |         | 748.98  | 1495.95 | 1495.73 | 61.03    | 0.00074                | KLQHELDEAEER             |
|    |              |                                                         |      |         | 752.60  | 1503.19 | 1502.76 | 72.06    | 6.30E-05               | ENQSILITGESGAGK          |
|    |              |                                                         |      |         | 810.75  | 1619.49 | 1620.72 | 57.80    | 0.0016                 | LEDEEEMNAELTAK           |
|    |              |                                                         |      |         | 816.81  | 1631.60 | 1631.78 | 96.03    | 2.60E-07               | LEEAGGATAAQIEMNK         |
|    |              |                                                         |      |         | 860.59  | 1719.16 | 1716.90 | 95.15    | 3.00E-07               | NKDPLNETVVGLYQK          |
|    |              |                                                         |      |         | 862.60  | 1723.18 | 1721.94 | 75.88    | 2.50E-05               | VQLLHSQNTSLLNQK          |
|    |              |                                                         |      |         | 897.20  | 1792.39 | 1790.76 | 52.36    | 0.0056                 | QREEQAEADGTEDADK         |
|    |              |                                                         |      |         | 931.62  | 1861.22 | 1858.88 | 99.10    | 1.10E-07               | LEQQVDDLEGSLEQEK         |
|    |              |                                                         |      |         | 949.82  | 1897.63 | 1895.90 | 59.47    | 0.00096                | HADSVSDLGEQIDNLQR        |
|    |              |                                                         |      |         | 995.29  | 1988.57 | 1986.97 | 72.80    | 4.40E-05               | LEQQVDDLEGSLEQEKK        |
|    |              |                                                         |      |         | 1099.79 | 2197.57 | 2197.01 | 97.21    | 1.60E-07               | ALQEAHQQTLDLQSEEDK       |
|    |              |                                                         |      |         | 1427.49 | 2852.97 | 2853.40 | 96.93    | 1.30E-07               | ALQEAHQQTLDLQSEEDKVNT    |
| 18 | gj 189536979 | PREDICTED: similar to slow myosin heavy chain 3 isoform | 48.2 | 1934    | 496.09  | 990.16  | 989.50  | 39.61    | 0.13                   | SNNFQKPR                 |
|    |              |                                                         |      |         | 1182.71 | 1181.70 | 1180.57 | 49.07    | 0.012                  | DFEISQLSSR               |
|    |              |                                                         |      |         | 1224.67 | 1223.66 | 1223.61 | 43.14    | 0.046                  | TKYETDAIQR               |
|    |              |                                                         |      |         | 641.99  | 1281.96 | 1281.54 | 41.73    | 0.067                  | EQYEEEEQAK               |
|    |              |                                                         |      |         | 643.04  | 1284.06 | 1282.57 | 37.91    | 0.16                   | ELTYQTEEDR               |
|    |              |                                                         |      |         | 685.16  | 1368.31 | 1367.63 | 47.57    | 0.017                  | LQHELDEAEER              |
|    |              |                                                         |      |         | 748.98  | 1495.95 | 1495.73 | 61.03    | 0.00074                | KLQHELDEAEER             |
|    |              |                                                         |      |         | 752.60  | 1503.19 | 1502.76 | 72.06    | 6.30E-05               | ENQSILITGESGAGK          |
|    |              |                                                         |      |         | 810.75  | 1619.49 | 1620.72 | 57.80    | 0.0016                 | LEDEEEMNAELTAK           |
|    |              |                                                         |      |         | 816.81  | 1631.60 | 1631.78 | 96.03    | 2.60E-07               | LEEAGGATAAQIEMNK         |
|    |              |                                                         |      |         | 860.59  | 1719.16 | 1716.90 | 95.15    | 3.00E-07               | NKDPLNETVVGLYQK          |
|    |              |                                                         |      |         | 862.60  | 1723.18 | 1721.94 | 75.88    | 2.50E-05               | VQLLHSQNTSLLNQK          |
|    |              |                                                         |      |         | 897.20  | 1792.39 | 1790.76 | 52.36    | 0.0056                 | QREEQAEADGTEDADK         |
|    |              |                                                         |      |         | 931.62  | 1861.22 | 1858.88 | 99.10    | 1.10E-07               | LEQQVDDLEGSLEQEK         |
|    |              |                                                         |      |         | 949.82  | 1897.63 | 1895.90 | 59.47    | 0.00096                | HADSVSDLGEQIDNLQR        |
|    |              |                                                         |      |         | 995.29  | 1988.57 | 1986.97 | 72.80    | 4.40E-05               | LEQQVDDLEGSLEQEKK        |
|    |              |                                                         |      |         | 1099.79 | 2197.57 | 2197.01 | 97.21    | 1.60E-07               | ALQEAHQQTLDLQSEEDK       |

|    |              |                                                         |      |      |         |         |         |        |          |                          |
|----|--------------|---------------------------------------------------------|------|------|---------|---------|---------|--------|----------|--------------------------|
| 19 | gi 83025080  | actinin, alpha 2 [Danio rerio]                          | 40.1 | 895  | 1427.49 | 2852.97 | 2853.40 | 96.93  | 1.30E-07 | ALQEAHQQTLDLQSEEDKVNT    |
|    |              |                                                         |      |      | 671.13  | 1340.24 | 1338.79 | 55.24  | 0.0029   | QAILGIQQEVLK             |
|    |              |                                                         |      |      | 826.12  | 1650.22 | 1648.81 | 71.27  | 7.40E-05 | KAGTQIENIEEDFR           |
|    |              |                                                         |      |      | 860.29  | 1718.57 | 1715.95 | 46.08  | 0.024    | ILAADKPYILSDELK          |
|    |              |                                                         |      |      | 873.76  | 1745.51 | 1743.87 | 73.20  | 4.60E-05 | DDPLGNLNLAFDIAEK         |
|    |              |                                                         |      |      | 885.47  | 1768.93 | 1768.81 | 104.59 | 3.20E-08 | KHEAFESDLSAHQDR          |
|    |              |                                                         |      |      | 916.62  | 1831.23 | 1828.89 | 71.45  | 6.60E-05 | MLDAEDILSTPKPDER         |
|    |              |                                                         |      |      | 969.28  | 1936.54 | 1934.98 | 74.47  | 3.10E-05 | GDLTNPYSTITAEIEIAIK      |
|    |              |                                                         |      |      | 1001.17 | 2000.32 | 1998.01 | 68.34  | 0.00013  | LEGDHQLIQESLIFDNK        |
|    |              |                                                         |      |      | 1050.91 | 2099.81 | 2099.09 | 86.17  | 2.00E-06 | LNKDDPLGNLNLAFDIAEK      |
| 20 | gi 66773080  | ATP synthase, H+ transporting, mitochondrial F1 comple: | 76   | 517  | 1412.81 | 2823.60 | 2824.40 | 93.56  | 2.70E-07 | VEQIAAIAQELNELDYHDVASVN  |
|    |              |                                                         |      |      | 975.59  | 974.58  | 974.55  | 36.11  | 0.31     | IGLFGGAGVGK              |
|    |              |                                                         |      |      | 704.65  | 1407.28 | 1405.67 | 96.20  | 2.30E-07 | AHGGYSVFAGVGER           |
|    |              |                                                         |      |      | 1436.69 | 1435.68 | 1434.75 | 46.62  | 0.022    | FTQAGSEVSALLGR           |
|    |              |                                                         |      |      | 720.70  | 1439.39 | 1438.78 | 77.81  | 1.60E-05 | VALTGLTVAEYFR            |
|    |              |                                                         |      |      | 730.22  | 1458.43 | 1456.83 | 60.63  | 0.00086  | TVLIMELINNVAK            |
|    |              |                                                         |      |      | 839.46  | 1676.91 | 1676.92 | 102.54 | 5.60E-08 | LVLEVAQHLGENTVR          |
|    |              |                                                         |      |      | 961.83  | 1921.65 | 1920.96 | 84.87  | 2.80E-06 | DQEGQDVLLFIDNIFR         |
|    |              |                                                         |      |      | 994.82  | 1987.63 | 1987.03 | 98.94  | 1.10E-07 | AIAELGIYPAVDPLDSTSR      |
|    |              |                                                         |      |      | 1003.42 | 2004.82 | 2004.05 | 79.87  | 8.60E-06 | FLSQPFQVAEVFTGHLGK       |
| 21 | gi 29725603  | myosin, light polypeptide 7, regulatory [Danio rerio]   | 77.9 | 172  | 687.83  | 2060.47 | 2059.99 | 39.81  | 0.087    | EGNDLYHEMIESGVINLK       |
|    |              |                                                         |      |      | 1282.47 | 3844.39 | 3841.97 | 52.51  | 0.0024   | KGSITSVQAIYVPADDLTDPPA   |
|    |              |                                                         |      |      | 1274.59 | 1273.58 | 1273.67 | 40.26  | 0.1      | LFDPNATGVVVK             |
|    |              |                                                         |      |      | 897.81  | 1793.60 | 1792.84 | 50.73  | 0.0081   | LNVSDEELESMLTEGK         |
|    |              |                                                         |      |      | 1048.00 | 2093.99 | 2091.96 | 79.59  | 9.30E-06 | GSSNVFSMFEQSQIQEFK       |
|    |              |                                                         |      |      | 1292.50 | 2582.99 | 2582.25 | 108.90 | 9.00E-09 | FTAAEVDQAFAPIDVAGNIDY    |
|    |              |                                                         |      |      | 489.47  | 976.93  | 975.44  | 36.02  | 0.29     | AGFAGDDAPR               |
|    |              |                                                         |      |      | 600.05  | 1198.08 | 1197.51 | 75.20  | 3.20E-05 | DSYVGDEAQS               |
|    |              |                                                         |      |      | 895.36  | 1788.71 | 1789.88 | 109.27 | 1.10E-08 | SYELPDGQVITIGNER         |
|    |              |                                                         |      |      | 1954.17 | 1953.16 | 1953.06 | 81.42  | 6.20E-06 | VAPPEHPVLLTEAPLNPK       |
| 22 | gi 189537429 | PREDICTED: hypothetical protein [Danio rerio]           | 48.3 | 377  | 489.47  | 976.93  | 975.44  | 36.02  | 0.29     | AGFAGDDAPR               |
|    |              |                                                         |      |      | 600.05  | 1198.08 | 1197.51 | 75.20  | 3.20E-05 | DSYVGDEAQS               |
|    |              |                                                         |      |      | 895.36  | 1788.71 | 1789.88 | 109.27 | 1.10E-08 | SYELPDGQVITIGNER         |
|    |              |                                                         |      |      | 1954.17 | 1953.16 | 1953.06 | 81.42  | 6.20E-06 | VAPPEHPVLLTEAPLNPK       |
|    |              |                                                         |      |      | 489.47  | 976.93  | 975.44  | 36.02  | 0.29     | AGFAGDDAPR               |
|    |              |                                                         |      |      | 600.05  | 1198.08 | 1197.51 | 75.20  | 3.20E-05 | DSYVGDEAQS               |
|    |              |                                                         |      |      | 895.36  | 1788.71 | 1789.88 | 109.27 | 1.10E-08 | SYELPDGQVITIGNER         |
|    |              |                                                         |      |      | 1954.17 | 1953.16 | 1953.06 | 81.42  | 6.20E-06 | VAPPEHPVLLTEAPLNPK       |
|    |              |                                                         |      |      | 1224.67 | 1223.66 | 1223.61 | 43.14  | 0.046    | TKYETDAIQR               |
|    |              |                                                         |      |      | 641.99  | 1281.96 | 1281.54 | 41.73  | 0.067    | EQYEEEQEAK               |
| 23 | gi 50344802  | hypothetical protein LOC415164 [Danio rerio]            | 48.3 | 377  | 752.60  | 1503.19 | 1502.76 | 72.06  | 6.30E-05 | ENQSILITGESGAGK          |
|    |              |                                                         |      |      | 846.60  | 1691.19 | 1690.81 | 85.65  | 2.80E-06 | NSYEETLDHLETLK           |
|    |              |                                                         |      |      | 931.62  | 1861.22 | 1858.88 | 99.10  | 1.10E-07 | LEQQVDDLEGSLEQEK         |
|    |              |                                                         |      |      | 943.56  | 1885.10 | 1884.92 | 73.56  | 3.90E-05 | QADSV AELGEQIDNLQR       |
|    |              |                                                         |      |      | 995.29  | 1988.57 | 1986.97 | 72.80  | 4.40E-05 | LEQQVDDLEGSLEQEK         |
|    |              |                                                         |      |      | 1010.39 | 2018.76 | 2016.00 | 68.23  | 0.00013  | NLQQEITDLTEQLGETGK       |
|    |              |                                                         |      |      | 1108.55 | 2215.08 | 2213.03 | 110.50 | 7.20E-09 | SEIQAALEEAATLEHEESK      |
|    |              |                                                         |      |      | 786.18  | 1570.35 | 1568.82 | 59.32  | 0.0012   | FKLEPPTGDELPAK           |
|    |              |                                                         |      |      | 1695.68 | 1694.67 | 1694.78 | 51.72  | 0.0067   | FNPETDYLTAPNGEK          |
|    |              |                                                         |      |      | 857.83  | 1713.65 | 1711.84 | 77.20  | 1.80E-05 | EVNQEVYSFLASAGAK         |
| 24 | gi 189520343 | PREDICTED: similar to myosin heavy chain fast skeletal  | 47.5 | 1933 | 878.27  | 1754.52 | 1752.88 | 68.60  | 0.00013  | IVYGHLLDDPAGQEIAK        |
|    |              |                                                         |      |      | 954.55  | 1907.08 | 1905.98 | 68.05  | 0.00014  | KQGLLPLTFSNPADYDK        |
|    |              |                                                         |      |      | 1041.84 | 2081.67 | 2080.94 | 61.45  | 0.0006   | NNISWVVVGDENYGEKSSR      |
|    |              |                                                         |      |      | 1106.24 | 2210.46 | 2209.04 | 53.72  | 0.0034   | KNNISWVVVGDENYGEKSSR     |
|    |              |                                                         |      |      | 1267.35 | 2532.69 | 2532.29 | 120.88 | 5.80E-10 | GHLDNISNLLIGAVNIENDGVN   |
|    |              |                                                         |      |      | 1361.62 | 2721.22 | 2721.43 | 65.92  | 0.00017  | NDANPATHAFVTSPEIVTALAIAK |
|    |              |                                                         |      |      | 786.18  | 1570.35 | 1568.82 | 59.32  | 0.0012   | FKLEPPTGDELPAK           |
|    |              |                                                         |      |      | 1695.68 | 1694.67 | 1694.78 | 51.72  | 0.0067   | FNPETDYLTAPNGEK          |
|    |              |                                                         |      |      | 857.83  | 1713.65 | 1711.84 | 77.20  | 1.80E-05 | EVNQEVYSFLASAGAK         |
|    |              |                                                         |      |      | 878.27  | 1754.52 | 1752.88 | 68.60  | 0.00013  | IVYGHLLDDPAGQEIAK        |
| 25 | gi 38707983  | aconitase 2, mitochondrial [Danio rerio]                | 55.2 | 782  | 954.55  | 1907.08 | 1905.98 | 68.05  | 0.00014  | KQGLLPLTFSNPADYDK        |
|    |              |                                                         |      |      | 1041.84 | 2081.67 | 2080.94 | 61.45  | 0.0006   | NNISWVVVGDENYGEKSSR      |
|    |              |                                                         |      |      | 1106.24 | 2210.46 | 2209.04 | 53.72  | 0.0034   | KNNISWVVVGDENYGEKSSR     |
|    |              |                                                         |      |      | 1267.35 | 2532.69 | 2532.29 | 120.88 | 5.80E-10 | GHLDNISNLLIGAVNIENDGVN   |
|    |              |                                                         |      |      | 1361.62 | 2721.22 | 2721.43 | 65.92  | 0.00017  | NDANPATHAFVTSPEIVTALAIAK |

|    |              |                                                         |      |       |         |         |         |        |          |                         |
|----|--------------|---------------------------------------------------------|------|-------|---------|---------|---------|--------|----------|-------------------------|
| 26 | gi 189540220 | PREDICTED: hypothetical protein LOC393472 [Danio rerio] | 44.2 | 1937  | 1224.67 | 1223.66 | 1223.61 | 43.14  | 0.046    | TKYETDAIQR              |
|    |              |                                                         |      |       | 752.60  | 1503.19 | 1502.76 | 72.06  | 6.30E-05 | ENQSILITGESGAGK         |
|    |              |                                                         |      |       | 816.81  | 1631.60 | 1631.78 | 96.03  | 2.60E-07 | LEEAGGATAAQIEMNK        |
|    |              |                                                         |      |       | 931.62  | 1861.22 | 1858.88 | 99.10  | 1.10E-07 | LEQQVDDLEGSLEQEK        |
|    |              |                                                         |      |       | 943.56  | 1885.10 | 1884.92 | 73.56  | 3.90E-05 | QADSV AELGEQIDNLQR      |
|    |              |                                                         |      |       | 995.29  | 1988.57 | 1986.97 | 72.80  | 4.40E-05 | LEQQVDDLEGSLEQEKK       |
|    |              |                                                         |      |       | 1003.16 | 2004.30 | 2001.99 | 56.30  | 0.0019   | NLQQEISDLTEQLGETGK      |
| 27 | gi 18858335  | bactin1 [Danio rerio]                                   | 46.1 | 375   | 489.47  | 976.93  | 975.44  | 36.02  | 0.29     | AGFAGDDAPR              |
|    |              |                                                         |      |       | 600.05  | 1198.08 | 1197.51 | 75.20  | 3.20E-05 | DSYVGDEAQS K            |
|    |              |                                                         |      |       | 895.36  | 1788.71 | 1789.88 | 109.27 | 1.10E-08 | SYELPDGQVITIGNER        |
| 28 | gi 18858961  | lactate dehydrogenase B4 [Danio rerio]                  | 65.3 | 334   | 710.69  | 1419.36 | 1417.79 | 76.48  | 2.30E-05 | LITPLASGPAEPPR          |
|    |              |                                                         |      |       | 770.19  | 1538.36 | 1537.77 | 74.86  | 3.10E-05 | IVADKDYSVTANSR          |
|    |              |                                                         |      |       | 843.74  | 1685.46 | 1684.85 | 114.34 | 3.50E-09 | ELADELALVDVVEDR         |
| 29 | gi 148596963 | spectrin alpha 2 [Danio rerio]                          | 43.5 | 2480  | 787.22  | 1572.42 | 1571.78 | 80.51  | 9.20E-06 | HQALQAEISGHEPR          |
|    |              |                                                         |      |       | 851.84  | 1701.66 | 1699.88 | 93.88  | 3.80E-07 | KHQALQAEISGHEPR         |
|    |              |                                                         |      |       | 869.56  | 1737.10 | 1736.82 | 56.93  | 0.0019   | TATDEAYKDPSNLQ GK       |
|    |              |                                                         |      |       | 873.61  | 1745.21 | 1744.82 | 38.53  | 0.14     | LSDDNTIGQEEIQQR         |
|    |              |                                                         |      |       | 882.85  | 1763.69 | 1760.88 | 36.14  | 0.24     | KHQLLEADISAHEDR         |
|    |              |                                                         |      |       | 926.15  | 1850.29 | 1848.86 | 74.98  | 2.80E-05 | KFE EFQTDLAAHEER        |
|    |              |                                                         |      |       | 964.07  | 1926.13 | 1924.90 | 93.25  | 4.10E-07 | SSLSSAEADFSQLAELDR      |
|    |              |                                                         |      |       | 698.23  | 2091.67 | 2091.08 | 70.44  | 7.60E-05 | LEAELGAHEPAIQSVLETGK    |
|    |              |                                                         |      |       | 1077.98 | 2153.95 | 2153.10 | 123.55 | 3.70E-10 | ALINADELANDVAGAEALLDR   |
|    |              |                                                         |      |       | 1110.83 | 2219.64 | 2219.03 | 45.13  | 0.025    | STDEAGQALLNTGHYASEEVK   |
|    |              |                                                         |      |       | 750.39  | 2248.15 | 2247.19 | 67.14  | 0.00016  | RLEAELGAHEPAIQSVLETGK   |
|    |              |                                                         |      |       | 831.34  | 2490.98 | 2489.22 | 39.47  | 0.08     | EKEPIVGSPDYGKDEDSAEALLR |
| 30 | gi 189523699 | PREDICTED: titin a [Danio rerio]                        | 52   | 32757 | 804.70  | 1607.39 | 1605.88 | 52.60  | 0.0054   | AEDPLFLPSPPAKPK         |
|    |              |                                                         |      |       | 831.24  | 1660.46 | 1658.82 | 50.71  | 0.0084   | VNVEVEYTEPVPER          |
|    |              |                                                         |      |       | 863.58  | 1725.14 | 1722.92 | 52.16  | 0.0057   | AGSDLVLDAAVGGKPEPK      |
|    |              |                                                         |      |       | 947.83  | 1893.64 | 1892.90 | 52.96  | 0.0043   | HTVTLSEKPDHDGGSK        |
|    |              |                                                         |      |       | 968.75  | 1935.49 | 1936.07 | 49.40  | 0.0099   | AVNEAGASRPSVTAGPIVIK    |
|    |              |                                                         |      |       | 1015.88 | 2029.75 | 2029.15 | 63.89  | 0.00033  | KVPAKPVEAITVPTTEPPK     |
|    |              |                                                         |      |       | 1029.07 | 2056.13 | 2056.09 | 70.98  | 6.60E-05 | ELPISFVTPLADVHVY EK     |
|    |              |                                                         |      |       | 1035.13 | 2068.25 | 2067.07 | 47.02  | 0.017    | NKFDVPDAPQNVIVGNV NK    |
|    |              |                                                         |      |       | 1049.90 | 2097.79 | 2095.07 | 51.75  | 0.0057   | LQGEVLSPPDVEIIEDGAK     |
|    |              |                                                         |      |       | 1052.35 | 2102.69 | 2102.05 | 79.10  | 1.10E-05 | EQVTHQAALLQSHEVQER      |
|    |              |                                                         |      |       | 1058.69 | 2115.37 | 2113.11 | 54.55  | 0.003    | VLAENEHGIGLPAETPEPLK    |
|    |              |                                                         |      |       | 708.80  | 2123.37 | 2122.13 | 68.98  | 0.0001   | VLDRPGPSSGPLDITGLTAEK   |
|    |              |                                                         |      |       | 1070.08 | 2138.14 | 2137.14 | 45.22  | 0.025    | EQHKPVVLSVNETTQTL SK    |
|    |              |                                                         |      |       | 1079.92 | 2157.82 | 2157.24 | 49.64  | 0.0092   | KVPAKPVEAITVPTTEPPK K   |
|    |              |                                                         |      |       | 1098.94 | 2195.87 | 2196.14 | 55.19  | 0.0025   | VLDRPGPPDGPISYIGVTSEK   |
|    |              |                                                         |      |       | 1101.80 | 2201.58 | 2199.25 | 68.20  | 0.00013  | KLPAKPDETIAPVPIEPPK K   |
|    |              |                                                         |      |       | 1140.29 | 2278.57 | 2276.23 | 39.60  | 0.087    | VKEPPSII EK PESQDVIPGSK |
|    |              |                                                         |      |       | 1177.07 | 2352.13 | 2351.12 | 38.63  | 0.1      | VSWRPPSDDGGSDIFGYIVER   |
|    |              |                                                         |      |       | 1224.99 | 2447.97 | 2447.27 | 40.79  | 0.062    | VNDAENLHPSTVFTIPNLPELK  |
|    |              |                                                         |      |       | 1299.87 | 2597.72 | 2597.14 | 69.48  | 7.90E-05 | EKEVEEPEEPEEEYHPSLNER   |
|    |              |                                                         |      |       | 1072.88 | 3215.61 | 3213.65 | 67.41  | 0.0001   | SHAIDSAPIVAQYPTPPGPPTS  |
| 31 | gi 66472732  | myosin heavy chain 4 [Danio rerio]                      | 41.7 | 1935  | 1224.67 | 1223.66 | 1223.61 | 43.14  | 0.046    | TKYETDAIQR              |
|    |              |                                                         |      |       | 816.81  | 1631.60 | 1631.78 | 96.03  | 2.60E-07 | LEEAGGATAAQIEMNK        |
|    |              |                                                         |      |       | 931.62  | 1861.22 | 1858.88 | 99.10  | 1.10E-07 | LEQQVDDLEGSLEQEK        |
|    |              |                                                         |      |       | 943.56  | 1885.10 | 1884.92 | 73.56  | 3.90E-05 | QADSV AELGEQIDNLQR      |
|    |              |                                                         |      |       | 995.29  | 1988.57 | 1986.97 | 72.80  | 4.40E-05 | LEQQVDDLEGSLEQEKK       |
|    |              |                                                         |      |       | 1003.16 | 2004.30 | 2001.99 | 56.30  | 0.0019   | NLQQEISDLTEQIGETGK      |

|    |              |                                                            |      |         |         |         |         |          |                      |                       |
|----|--------------|------------------------------------------------------------|------|---------|---------|---------|---------|----------|----------------------|-----------------------|
|    |              |                                                            |      | 1044.21 | 2086.41 | 2088.02 | 74.04   | 3.20E-05 | TKLEQQVDDLEGSLEQEK   |                       |
|    |              |                                                            |      | 1087.82 | 2173.62 | 2173.01 | 88.30   | 1.20E-06 | NDLQLAVASEAENLSDAEER |                       |
|    |              |                                                            |      | 738.94  | 2213.78 | 2213.03 | 41.26   | 0.061    | AEIQTALEEAEGTLEHEESK |                       |
| 32 | gi 189519129 | PREDICTED: similar to myosin heavy chain 4 [Danio rerio]   | 41.2 | 1933    | 1224.67 | 1223.66 | 1223.61 | 43.14    | 0.046                | TKYETDAIQR            |
|    |              |                                                            |      |         | 816.81  | 1631.60 | 1631.78 | 96.03    | 2.60E-07             | LEEAGGATAAQIEMNK      |
|    |              |                                                            |      |         | 931.62  | 1861.22 | 1858.88 | 99.10    | 1.10E-07             | LEQQVDDLEGSLEQEK      |
|    |              |                                                            |      |         | 943.56  | 1885.10 | 1884.92 | 73.56    | 3.90E-05             | QADSVaelGEQIDNLQR     |
|    |              |                                                            |      |         | 995.29  | 1988.57 | 1986.97 | 72.80    | 4.40E-05             | LEQQVDDLEGSLEQEKK     |
|    |              |                                                            |      |         | 1003.16 | 2004.30 | 2001.99 | 56.30    | 0.0019               | NLQQEISDLTEQIGETGK    |
|    |              |                                                            |      |         | 1044.21 | 2086.41 | 2088.02 | 74.04    | 3.20E-05             | TKLEQQVDDLEGSLEQEK    |
|    |              |                                                            |      |         | 1087.82 | 2173.62 | 2173.01 | 88.30    | 1.20E-06             | NDLQLAVASEAENLSDAEER  |
|    |              |                                                            |      |         | 738.94  | 2213.78 | 2213.03 | 41.26    | 0.061                | AEIQTALEEAEGTLEHEESK  |
| 33 | gi 169259784 | myosin, heavy polypeptide 1, skeletal muscle [Danio rerio] | 36.4 | 1937    | 1224.67 | 1223.66 | 1223.61 | 43.14    | 0.046                | TKYETDAIQR            |
|    |              |                                                            |      |         | 816.81  | 1631.60 | 1631.78 | 96.03    | 2.60E-07             | LEEAGGATAAQIEMNK      |
|    |              |                                                            |      |         | 931.62  | 1861.22 | 1858.88 | 99.10    | 1.10E-07             | LEQQVDDLEGSLEQEK      |
|    |              |                                                            |      |         | 943.56  | 1885.10 | 1884.92 | 73.56    | 3.90E-05             | QADSVaelGEQIDNLQR     |
|    |              |                                                            |      |         | 995.29  | 1988.57 | 1986.97 | 72.80    | 4.40E-05             | LEQQVDDLEGSLEQEKK     |
|    |              |                                                            |      |         | 1003.16 | 2004.30 | 2001.99 | 56.30    | 0.0019               | NLQQEISDLTEQLGETGK    |
|    |              |                                                            |      |         | 1044.21 | 2086.41 | 2088.02 | 74.04    | 3.20E-05             | TKLEQQVDDLEGSLEQEK    |
|    |              |                                                            |      |         | 738.94  | 2213.78 | 2213.03 | 41.26    | 0.061                | AEIQTALEEAEGTLEHEESK  |
| 34 | gi 18858427  | creatine kinase, muscle a [Danio rerio]                    | 40.2 | 381     | 754.73  | 1507.44 | 1506.70 | 57.40    | 0.0017               | GGDDLDPNYVLSSR        |
|    |              |                                                            |      |         | 999.17  | 1996.33 | 1993.93 | 107.13   | 1.60E-08             | GTGGVDTASVGGVFDISNADR |
| 35 | gi 189540216 | PREDICTED: wu:fd14a01 [Danio rerio]                        | 46   | 1936    | 1224.67 | 1223.66 | 1223.61 | 43.14    | 0.046                | TKYETDAIQR            |
|    |              |                                                            |      |         | 816.81  | 1631.60 | 1631.78 | 96.03    | 2.60E-07             | LEEAGGATAAQIEMNK      |
|    |              |                                                            |      |         | 931.62  | 1861.22 | 1858.88 | 99.10    | 1.10E-07             | LEQQVDDLEGSLEQEK      |
|    |              |                                                            |      |         | 943.56  | 1885.10 | 1884.92 | 73.56    | 3.90E-05             | QADSVaelGEQIDNLQR     |
|    |              |                                                            |      |         | 995.29  | 1988.57 | 1986.97 | 72.80    | 4.40E-05             | LEQQVDDLEGSLEQEKK     |
|    |              |                                                            |      |         | 1003.16 | 2004.30 | 2001.99 | 56.30    | 0.0019               | NLQQEISDLTEQLGETGK    |
| 36 | gi 189523697 | PREDICTED: im:6911926 [Danio rerio]                        | 55.1 | 28836   | 671.64  | 1341.26 | 1340.73 | 47.09    | 0.019                | VTEHTVTGLLSGK         |
|    |              |                                                            |      |         | 700.80  | 1399.58 | 1399.71 | 67.53    | 0.00017              | HVSVEALDFIDR          |
|    |              |                                                            |      |         | 710.47  | 1418.92 | 1418.74 | 37.16    | 0.2                  | FGLGEALESEIVR         |
|    |              |                                                            |      |         | 808.51  | 1615.01 | 1612.87 | 52.28    | 0.0058               | ALDPVFKPGPPHNP        |
|    |              |                                                            |      |         | 830.81  | 1659.61 | 1660.95 | 47.43    | 0.018                | VILSKPDEPQGP          |
|    |              |                                                            |      |         | 856.20  | 1710.38 | 1709.82 | 61.51    | 0.00065              | ADSGNYTITIQNAAGSK     |
|    |              |                                                            |      |         | 863.58  | 1725.14 | 1722.92 | 52.16    | 0.0057               | AGSDLVLDAAVGGKPEPK    |
|    |              |                                                            |      |         | 885.45  | 1768.89 | 1768.91 | 37.29    | 0.17                 | SSVTLTWVKAHDGGSK      |
|    |              |                                                            |      |         | 920.85  | 1839.68 | 1838.93 | 50.02    | 0.009                | STVSLAWEKPLHDGGS      |
|    |              |                                                            |      |         | 924.84  | 1847.66 | 1845.01 | 54.27    | 0.0034               | VQILDKPGPPAGHIEFK     |
|    |              |                                                            |      |         | 929.14  | 1856.27 | 1854.92 | 68.20    | 0.00013              | TSVSLSWEKPIHDGGS      |
|    |              |                                                            |      |         | 951.67  | 1901.33 | 1898.91 | 43.42    | 0.04                 | TTVTLSWEKPEHDGGS      |
|    |              |                                                            |      |         | 648.76  | 1943.24 | 1941.02 | 43.23    | 0.04                 | IGESFEIDVPISGRPTPK    |
|    |              |                                                            |      |         | 989.31  | 1976.60 | 1976.14 | 42.13    | 0.052                | SQLERPGAPLKPVVS       |
|    |              |                                                            |      |         | 1013.79 | 2025.56 | 2025.09 | 38.16    | 0.13                 | ITIDTKPGHSTLSIAN      |
|    |              |                                                            |      |         | 1033.20 | 2064.39 | 2064.06 | 43.67    | 0.035                | VISGVQDLEYTVTDVIEGK   |
|    |              |                                                            |      |         | 1039.66 | 2077.30 | 2077.08 | 43.93    | 0.035                | HGTGEAFINLDVIDVPGPVK  |
|    |              |                                                            |      |         | 1045.73 | 2089.44 | 2089.14 | 70.70    | 7.20E-05             | DATIEITLDKGPPTGPVR    |
|    |              |                                                            |      |         | 1047.74 | 2093.46 | 2092.96 | 51.97    | 0.0054               | WTEPDSGGSPITNYVVEK    |
|    |              |                                                            |      |         | 1112.56 | 2223.10 | 2222.18 | 41.11    | 0.064                | VTAENEIGTDPSVPSKILAK  |
|    |              |                                                            |      |         | 1146.20 | 2290.39 | 2289.16 | 55.90    | 0.002                | KGEWVAVTTDEIHQTVYSVK  |
|    |              |                                                            |      |         | 1152.84 | 2303.67 | 2302.28 | 45.00    | 0.024                | SEPKLAAPVIANDLTIEPSLK |
| 37 | gi 47085883  | hypothetical protein LOC406405 [Danio rerio]               | 76.9 | 337     | 661.18  | 1320.35 | 1319.67 | 78.24    | 1.50E-05             | GYIGADQLGDALK         |
|    |              |                                                            |      |         | 753.50  | 1504.98 | 1502.77 | 81.33    | 7.40E-06             | VEFPADQLSALTGR        |



|    |              |                                                            |      |      |         |         |         |        |          |                         |
|----|--------------|------------------------------------------------------------|------|------|---------|---------|---------|--------|----------|-------------------------|
| 38 | gi 41054601  | voltage-dependent anion channel 2 [Danio rerio]            | 89.4 | 283  | 1545.20 | 3088.39 | 3088.58 | 91.67  | 4.10E-07 | NSPLVSELSLFDIAHTPGVAADL |
|    |              |                                                            |      |      | 588.48  | 1174.94 | 1173.56 | 62.94  | 0.00059  | SEYGLTFTEK              |
|    |              |                                                            |      |      | 1429.74 | 1428.73 | 1427.69 | 59.35  | 0.0012   | LTFDITTFSPNTGK          |
|    |              |                                                            |      |      | 1052.33 | 2102.65 | 2102.15 | 73.62  | 3.70E-05 | VNNTSLVGVGYTQSLRPGIK    |
|    |              |                                                            |      |      | 1088.83 | 2175.64 | 2174.05 | 81.62  | 5.60E-06 | WNTDNTLGTEINIEDQIAK     |
| 39 | gi 41054651  | isocitrate dehydrogenase 2 (NADP+), mitochondrial [Dan     | 50.6 | 449  | 1258.10 | 2514.18 | 2513.15 | 75.22  | 2.20E-05 | TGDFQLHTNVNDGSEFGGSIYC  |
|    |              |                                                            |      |      | 578.00  | 1153.98 | 1153.57 | 40.85  | 0.086    | DIFQDIFEK               |
|    |              |                                                            |      |      | 678.57  | 1355.13 | 1354.68 | 66.05  | 0.00024  | TIEAEEAHGTVTR           |
|    |              |                                                            |      |      | 716.02  | 1430.02 | 1428.73 | 77.71  | 1.70E-05 | FKDIFQDIFEK             |
|    |              |                                                            |      |      | 861.13  | 1720.25 | 1719.82 | 116.07 | 2.40E-09 | DQTDDQVTIDSAIATK        |
| 40 | gi 66792936  | tropomyosin 4 isoform 1 [Danio rerio]                      | 62   | 284  | 1894.09 | 1893.08 | 1891.93 | 57.87  | 0.0014   | LNEHYVNTTDFLDAIK        |
|    |              |                                                            |      |      | 586.14  | 1170.26 | 1169.67 | 66.30  | 0.00025  | LVILEGELER              |
|    |              |                                                            |      |      | 623.18  | 1244.35 | 1242.65 | 53.21  | 0.0055   | IQLVEEELDR              |
|    |              |                                                            |      |      | 649.69  | 1297.36 | 1297.76 | 68.97  | 0.00013  | KLVILEGELER             |
|    |              |                                                            |      |      | 700.61  | 1399.21 | 1398.75 | 51.35  | 0.0072   | RIQLVEEELDR             |
|    |              |                                                            |      |      | 709.64  | 1417.26 | 1416.75 | 48.43  | 0.015    | DAQEKLELSEKK            |
|    |              |                                                            |      |      | 770.52  | 1539.02 | 1537.71 | 105.07 | 2.90E-08 | SIDDLEDELYAQK           |
|    |              |                                                            |      |      | 845.36  | 1688.70 | 1688.78 | 68.99  | 0.00013  | YSEKEDKYEEEIK           |
| 41 | gi 41053595  | nucleoside diphosphate kinase-Z2 [Danio rerio]             | 63.4 | 153  | 770.52  | 2308.54 | 2307.18 | 67.97  | 0.00013  | TVAKLEKSIDDLEDELYAQK    |
|    |              |                                                            |      |      | 550.56  | 1099.10 | 1098.53 | 38.00  | 0.18     | NLIHGSDSEK              |
|    |              |                                                            |      |      | 795.45  | 1588.88 | 1588.88 | 78.54  | 1.40E-05 | LVAAKFVQASEDLAK         |
|    |              |                                                            |      |      | 975.95  | 1949.88 | 1949.07 | 83.51  | 3.80E-06 | GFRLVAAKFVQASEDLAK      |
|    |              |                                                            |      |      | 1040.04 | 2078.06 | 2077.09 | 38.09  | 0.13     | YTSSGPLLAMVWEGLNVIK     |
| 42 | gi 189517521 | PREDICTED: hypothetical protein [Danio rerio]              | 41.3 | 143  | 1106.98 | 2211.95 | 2211.12 | 83.98  | 3.20E-06 | SAATEVSLWFKPEELVSUR     |
|    |              |                                                            |      |      | 934.97  | 1867.93 | 1867.99 | 120.19 | 8.40E-10 | IDDLLGALSSLSLHATK       |
| 43 | gi 125829449 | PREDICTED: similar to myosin heavy chain [Danio rerio]     | 36.8 | 1945 | 609.19  | 1216.37 | 1215.63 | 54.25  | 0.0044   | AGLLGQLEEMR             |
|    |              |                                                            |      |      | 643.04  | 1284.06 | 1282.57 | 37.91  | 0.16     | ELTYQTEEDR              |
|    |              |                                                            |      |      | 931.62  | 1861.22 | 1858.88 | 99.10  | 1.10E-07 | LEQQVDDLEGSLEQEK        |
|    |              |                                                            |      |      | 995.29  | 1988.57 | 1986.97 | 72.80  | 4.40E-05 | LEQQVDDLEGSLEQEKK       |
| 44 | gi 189535893 | PREDICTED: similar to myosin heavy chain [Danio rerio]     | 39.7 | 1938 | 1224.67 | 1223.66 | 1223.61 | 43.14  | 0.046    | TKYETDAIQR              |
|    |              |                                                            |      |      | 643.04  | 1284.06 | 1282.57 | 37.91  | 0.16     | ELTYQTEEDR              |
|    |              |                                                            |      |      | 931.62  | 1861.22 | 1858.88 | 99.10  | 1.10E-07 | LEQQVDDLEGSLEQEK        |
|    |              |                                                            |      |      | 995.29  | 1988.57 | 1986.97 | 72.80  | 4.40E-05 | LEQQVDDLEGSLEQEKK       |
| 45 | gi 41387136  | hypothetical protein LOC393781 [Danio rerio]               | 77.3 | 128  | 902.23  | 1802.45 | 1801.94 | 110.64 | 8.00E-09 | YHVSETPFAISAQKPK        |
|    |              |                                                            |      |      | 915.41  | 2743.19 | 2742.29 | 43.40  | 0.03     | LFPGDVILETGEVVPDFPEDSHC |
| 46 | gi 148922875 | hypothetical protein LOC567716 [Danio rerio]               | 34.4 | 331  | 969.23  | 1936.45 | 1936.93 | 114.30 | 3.20E-09 | HLTTLVDDIWIYYAGDR       |
|    |              |                                                            |      |      | 844.84  | 1687.67 | 1687.84 | 100.98 | 7.90E-08 | NIDYVAESIHEAVTK         |
| 47 | gi 47085773  | glutamic-oxaloacetic transaminase 1, soluble [Danio rerio] | 52.7 | 410  | 1115.35 | 2228.68 | 2226.03 | 103.90 | 3.40E-08 | NLFAFFDSAYQGFASGDLEK    |
|    |              |                                                            |      |      | 1147.92 | 2293.83 | 2295.13 | 40.61  | 0.067    | SGETEDTFIADLVVGLCTGQIK  |
| 48 | gi 48762657  | enolase 1, (alpha) [Danio rerio]                           | 57.9 | 432  | 1002.93 | 3005.75 | 3006.57 | 90.40  | 5.70E-07 | HIADLAGNPVILPVPFNVINGC  |
|    |              |                                                            |      |      | 594.84  | 1187.66 | 1187.68 | 73.04  | 6.00E-05 | ITAHLVHELRL             |
| 49 | gi 47085765  | hypothetical protein LOC406325 [Danio rerio]               | 79.3 | 397  | 649.07  | 1296.12 | 1294.70 | 56.75  | 0.0021   | RTPFGTYGGVLK            |
|    |              |                                                            |      |      | 683.58  | 1365.14 | 1364.63 | 58.96  | 0.0012   | DHSATDLAEHAAK           |
|    |              |                                                            |      |      | 931.96  | 1861.91 | 1861.98 | 116.41 | 2.10E-09 | TNVNGGAIAGHPLGASGTR     |
|    |              |                                                            |      |      | 1025.48 | 2048.94 | 2049.99 | 105.81 | 2.20E-08 | SLLQQFEEALATEEASER      |
| 50 | gi 38488731  | natriuretic peptide precursor A [Danio rerio]              | 77.4 | 106  | 1182.83 | 2363.65 | 2362.99 | 79.64  | 8.30E-06 | DREEAAAPGEDSNPSDGFDTQI  |
|    |              |                                                            |      |      | 1339.69 | 1338.68 | 1338.61 | 51.90  | 0.0061   | FHSDTIESEFK             |
| 51 | gi 162287365 | hemopexin [Danio rerio]                                    | 54.1 | 447  | 900.94  | 1799.87 | 1800.00 | 65.16  | 0.00028  | VGKPHTHLEGYPKPLK        |
|    |              |                                                            |      |      | 530.52  | 1588.54 | 1587.87 | 53.53  | 0.0044   | THINIVVIGHVDSGK         |
| 52 | gi 18858587  | elongation factor 1-alpha [Danio rerio]                    | 50.2 | 462  | 1244.91 | 2487.80 | 2486.35 | 68.46  | 0.0001   | VETGVLPKGMVVTFAPANVTTE  |
|    |              |                                                            |      |      | 973.65  | 2917.91 | 2917.55 | 69.48  | 7.00E-05 | EGNASGTTLLDALDAILPPSRPT |
|    |              |                                                            |      |      | 1015.61 | 3043.79 | 3045.65 | 67.12  | 0.00011  | KEGNASGTTLLDALDAILPPSRP |
|    |              |                                                            |      |      |         |         |         |        |          |                         |

|    |              |                                                           |      |      |         |         |         |        |          |                          |
|----|--------------|-----------------------------------------------------------|------|------|---------|---------|---------|--------|----------|--------------------------|
| 53 | gi 48762665  | ubiquinol-cytochrome c reductase core protein II [Danio r | 51.1 | 454  | 1245.78 | 1244.77 | 1244.68 | 74.35  | 4.30E-05 | KVDFAAAGEPLK             |
|    |              |                                                           |      |      | 1246.66 | 1245.65 | 1244.68 | 77.74  | 2.00E-05 | KVDFAAAGEPLK             |
|    |              |                                                           |      |      | 696.14  | 1390.27 | 1390.71 | 74.71  | 3.70E-05 | GVEAVGGSLSVSSSR          |
|    |              |                                                           |      |      | 1265.56 | 3793.64 | 3793.99 | 160.27 | 4.00E-14 | HQTGAGLVHALVAIEGASATSAI  |
| 54 | gi 189529246 | PREDICTED: hypothetical protein [Danio rerio]             | 45.4 | 119  | 599.32  | 1196.62 | 1195.75 | 37.92  | 0.16     | AKLEPVVLSLK              |
|    |              |                                                           |      |      | 1050.98 | 2099.94 | 2100.09 | 88.07  | 1.30E-06 | ELTELGEQVKPHFEGIFK       |
|    |              |                                                           |      |      | 1115.07 | 2228.12 | 2228.18 | 64.05  | 0.00032  | KELTELGEQVKPHFEGIFK      |
| 55 | gi 47086523  | ictacalcin [Danio rerio]                                  | 86.3 | 95   | 697.11  | 1392.20 | 1390.73 | 104.53 | 3.60E-08 | ELLSAELGDIFGK            |
| 56 | gi 40786398  | pyruvate kinase, muscle, a [Danio rerio]                  | 66.4 | 532  | 882.38  | 1762.75 | 1763.98 | 115.54 | 2.70E-09 | KGVNLPGAAVDLPVSEK        |
|    |              |                                                           |      |      | 938.02  | 1874.03 | 1872.82 | 42.98  | 0.045    | MNFSHGSHEYHGETIK         |
| 57 | gi 47086807  | acyl-Coenzyme A dehydrogenase, very long chain [Danic     | 66.2 | 659  | 837.57  | 1673.13 | 1671.94 | 104.71 | 3.20E-08 | AIEQFGAVIEELLLK          |
|    |              |                                                           |      |      | 872.48  | 2614.41 | 2614.37 | 42.99  | 0.034    | AGLGSGLTLQGTVHPELNHSGE   |
| 58 | gi 54400698  | hydroxysteroid (17-beta) dehydrogenase 10 [Danio rerio]   | 70.4 | 260  | 851.87  | 1701.73 | 1702.86 | 109.48 | 1.00E-08 | HGASAVILDLPSSDGHK        |
| 59 | gi 156713467 | vitellogenin 7 [Danio rerio]                              | 55.7 | 1358 | 587.59  | 1173.17 | 1172.62 | 60.66  | 0.001    | LEFEVQVGPR               |
|    |              |                                                           |      |      | 1299.73 | 1298.72 | 1298.71 | 49.73  | 0.011    | EIELTAALPSQK             |
|    |              |                                                           |      |      | 1706.13 | 1705.12 | 1705.02 | 40.57  | 0.087    | WLLDALPAVGTPVIK          |
|    |              |                                                           |      |      | 1069.54 | 2137.07 | 2135.16 | 100.74 | 6.90E-08 | ISDATAQIVEVLTHLVANNK     |
| 60 | gi 148224245 | hypothetical protein LOC793834 [Danio rerio]              | 62.4 | 763  | 653.09  | 1304.16 | 1303.71 | 82.76  | 5.60E-06 | MQLLEIITTDK              |
|    |              |                                                           |      |      | 804.74  | 1607.47 | 1606.81 | 72.46  | 5.60E-05 | DVNTEALEILEAYK           |
|    |              |                                                           |      |      | 1049.90 | 2097.78 | 2095.02 | 66.49  | 0.00019  | AGVEQGPTTGYLVESQQFGK     |
|    |              |                                                           |      |      | 1195.44 | 3583.28 | 3583.84 | 76.05  | 1.20E-05 | KLDSLTTGFGFPVGAATLADEV(  |
| 61 | gi 40254659  | bactin2 [Danio rerio]                                     | 44   | 375  | 489.47  | 976.93  | 975.44  | 36.02  | 0.29     | AGFAGDDAPR               |
|    |              |                                                           |      |      | 600.05  | 1198.08 | 1197.51 | 75.20  | 3.20E-05 | DSYVGDEAQS               |
|    |              |                                                           |      |      | 1954.17 | 1953.16 | 1953.06 | 81.42  | 6.20E-06 | VAPEEHPVLLTEAPLNPK       |
| 62 | gi 157426949 | hydroxyacyl-Coenzyme A dehydrogenase/3-ketoacyl-Co        | 74.6 | 761  | 653.09  | 1304.16 | 1303.71 | 82.76  | 5.60E-06 | MQLLEIITTDK              |
|    |              |                                                           |      |      | 698.19  | 1394.36 | 1392.67 | 54.97  | 0.0032   | LSGQLDYHGF               |
|    |              |                                                           |      |      | 837.73  | 1673.45 | 1672.93 | 67.82  | 0.00016  | MGLVHQLVDPLGPK           |
|    |              |                                                           |      |      | 1167.77 | 3500.29 | 3497.79 | 58.92  | 0.00062  | LDSLTTGFGFPVGLATLADEVGI  |
| 63 | gi 47086021  | aldolase a, fructose-bisphosphate, b [Danio rerio]        | 64.8 | 364  | 530.65  | 1059.29 | 1058.57 | 51.67  | 0.0085   | KELSDIAQR                |
|    |              |                                                           |      |      | 568.04  | 1134.06 | 1132.66 | 42.00  | 0.069    | LFSQLIKER                |
|    |              |                                                           |      |      | 660.09  | 1318.16 | 1317.68 | 91.48  | 7.50E-07 | GILAADESTGSVAK           |
|    |              |                                                           |      |      | 876.65  | 1751.28 | 1749.80 | 94.12  | 3.70E-07 | GDTGAAAGESLFFVANHAY      |
|    |              |                                                           |      |      | 1174.96 | 2347.90 | 2347.17 | 50.36  | 0.007    | GVVPLAGTNGETTTQGLDGLYE   |
| 64 | gi 47271422  | triosephosphate isomerase 1b [Danio rerio]                | 88.3 | 248  | 696.12  | 1390.22 | 1388.71 | 83.57  | 4.70E-06 | SIEELANTLNSAK            |
|    |              |                                                           |      |      | 1458.87 | 1457.86 | 1457.72 | 49.98  | 0.01     | HVFGESDELIGQK            |
|    |              |                                                           |      |      | 801.94  | 1601.87 | 1601.88 | 47.81  | 0.017    | VVLAYEPVWAIGTGK          |
|    |              |                                                           |      |      | 808.26  | 1614.50 | 1613.82 | 63.83  | 0.0004   | RHVFGESDELIGQK           |
|    |              |                                                           |      |      | 1216.87 | 2431.73 | 2431.30 | 60.01  | 0.00071  | DLDGFLVGGASLKPEFIDIINAK  |
| 65 | gi 8395615   | cytochrome c oxidase subunit II [Danio rerio]             | 31.7 | 230  | 1068.17 | 2134.32 | 2133.18 | 94.22  | 3.20E-07 | ILVSAEDVLHSAVPSLGIK      |
| 66 | gi 47086533  | 2-peptidylprolyl isomerase A [Danio rerio]                | 47   | 164  | 820.79  | 1639.56 | 1637.91 | 94.27  | 3.60E-07 | HVVFGQVVEGLDVIK          |
| 67 | gi 117606264 | sarcalumenin [Danio rerio]                                | 52.1 | 482  | 731.19  | 1460.36 | 1459.77 | 63.21  | 0.00049  | VTFVDTPGIENR             |
|    |              |                                                           |      |      | 1738.02 | 1737.01 | 1735.95 | 88.70  | 1.30E-06 | AITHELPSLLGSINSGK        |
|    |              |                                                           |      |      | 1036.41 | 2070.80 | 2069.08 | 65.94  | 0.00022  | REEISLLEDLNQVIENR        |
| 68 | gi 62955689  | hypothetical protein LOC550556 [Danio rerio]              | 38.1 | 270  | 842.00  | 1681.99 | 1682.84 | 89.42  | 1.10E-06 | AFAEFLTEEIK              |
| 69 | gi 147906978 | hypothetical protein LOC492719 [Danio rerio]              | 60.4 | 603  | 1379.96 | 2757.90 | 2756.52 | 38.69  | 0.09     | TLEEVETIKPTAIGVAAIGGAF   |
|    |              |                                                           |      |      | 1006.36 | 3016.04 | 3013.43 | 94.02  | 2.40E-07 | HISDDIFLTTAEAISEMVTEEHLA |
| 70 | gi 47087061  | glutamic-oxaloacetic transaminase 2a, mitochondrial (as   | 49.8 | 428  | 644.14  | 1286.26 | 1284.69 | 49.82  | 0.011    | GALDDISKIPEK             |
|    |              |                                                           |      |      | 706.10  | 1410.19 | 1408.72 | 67.95  | 0.00015  | EYLPIGGLADFSK            |
|    |              |                                                           |      |      | 723.85  | 1445.68 | 1445.81 | 66.36  | 0.00024  | IAATILNTPELYK            |
|    |              |                                                           |      |      | 947.98  | 1893.94 | 1893.02 | 70.95  | 6.90E-05 | KLDKEYLPIGGLADFSK        |
|    |              |                                                           |      |      | 998.97  | 1995.92 | 1994.03 | 41.92  | 0.054    | YFIEQGHNILLSQSF          |
|    |              |                                                           |      |      | 784.61  | 2350.79 | 2350.26 | 62.99  | 0.00038  | ISVAGVTSANVEYLAHAIHAVTK  |

|    |              |                                                             |      |      |         |         |         |       |          |                          |
|----|--------------|-------------------------------------------------------------|------|------|---------|---------|---------|-------|----------|--------------------------|
| 71 | gi 544400442 | hypothetical protein LOC449795 [Danio rerio]                | 79.2 | 202  | 999.96  | 2996.84 | 2996.41 | 42.81 | 0.031    | TLAAGSHAHDGQPYCHKPCY/    |
|    |              |                                                             |      |      | 1008.19 | 3021.55 | 3023.42 | 63.54 | 0.00026  | TLNPGGHAEHDGKPYCHKPCY/   |
|    |              |                                                             |      |      | 1008.49 | 3022.44 | 3022.46 | 54.27 | 0.0022   | GVNIGGAGSYVYDTPVGDDSVF   |
|    |              |                                                             |      |      | 1009.02 | 3024.02 | 3023.42 | 61.13 | 0.00046  | TLNPGGHAEHDGKPYCHKPCY/   |
| 72 | gi 47086069  | hypothetical protein LOC406529 [Danio rerio]                | 72.1 | 283  | 930.44  | 1858.86 | 1858.82 | 97.79 | 1.50E-07 | SQSGVEFTTGGSSNTDTGK      |
|    |              |                                                             |      |      | 1030.87 | 2059.73 | 2058.12 | 72.35 | 4.90E-05 | VNNASLVGVGYTQSLRPGVK     |
| 73 | gi 50344894  | tropomyosin 2 (beta) [Danio rerio]                          | 52.5 | 284  | 586.14  | 1170.26 | 1169.67 | 66.30 | 0.00025  | LVILEGELER               |
|    |              |                                                             |      |      | 623.18  | 1244.35 | 1242.65 | 53.21 | 0.0055   | IQLVEEELDR               |
|    |              |                                                             |      |      | 649.69  | 1297.36 | 1297.76 | 68.97 | 0.00013  | KLVILEGELER              |
|    |              |                                                             |      |      | 700.61  | 1399.21 | 1398.75 | 51.35 | 0.0072   | RIQLVEEELDR              |
|    |              |                                                             |      |      | 709.10  | 1416.18 | 1415.73 | 49.47 | 0.012    | DAQEKLEQAEKK             |
| 74 | gi 166795887 | vitellogenin 1 [Danio rerio]                                | 51.8 | 1362 | 587.59  | 1173.17 | 1172.62 | 60.66 | 0.001    | LEFEVQVGPR               |
|    |              |                                                             |      |      | 682.95  | 1363.89 | 1363.69 | 44.02 | 0.039    | HILTAAYDTGFR             |
|    |              |                                                             |      |      | 691.81  | 1381.61 | 1381.78 | 51.39 | 0.0071   | ISDAPAQIVEVLK            |
|    |              |                                                             |      |      | 1706.13 | 1705.12 | 1705.02 | 40.57 | 0.087    | WLLDALPAVGTPVVIK         |
| 75 | gi 41152342  | creatine kinase, mitochondrial 2 (sarcomeric) [Danio rerio] | 47.7 | 413  | 1503.86 | 1502.85 | 1501.78 | 37.62 | 0.18     | GQDITVPSVPSQFK           |
|    |              |                                                             |      |      | 1042.49 | 2082.96 | 2079.97 | 96.83 | 1.70E-07 | GTGGVDTAAVGDTFDISNLDR    |
| 76 | gi 41054193  | hypothetical protein LOC327506 [Danio rerio]                | 38.2 | 178  | 1042.49 | 2082.96 | 2079.97 | 96.83 | 1.70E-07 | GTGGVDTAAVGDTFDISNLDR    |
| 77 | gi 160420306 | hypothetical protein LOC678536 [Danio rerio]                | 51.3 | 1358 | 587.59  | 1173.17 | 1172.62 | 60.66 | 0.001    | LEFEVQVGPR               |
|    |              |                                                             |      |      | 1299.73 | 1298.72 | 1298.71 | 49.73 | 0.011    | EIELTAALPSQK             |
|    |              |                                                             |      |      | 691.81  | 1381.61 | 1381.78 | 51.39 | 0.0071   | ISDAPAQIVEVLK            |
|    |              |                                                             |      |      | 1706.13 | 1705.12 | 1705.02 | 40.57 | 0.087    | WLLDALPAVGTPVVIK         |
| 78 | gi 41054435  | hypothetical protein LOC324244 [Danio rerio]                | 38.3 | 248  | 586.14  | 1170.26 | 1169.67 | 66.30 | 0.00025  | LVILEGELER               |
|    |              |                                                             |      |      | 623.18  | 1244.35 | 1242.65 | 53.21 | 0.0055   | IQLVEEELDR               |
|    |              |                                                             |      |      | 649.69  | 1297.36 | 1297.76 | 68.97 | 0.00013  | KLVILEGELER              |
|    |              |                                                             |      |      | 700.61  | 1399.21 | 1398.75 | 51.35 | 0.0072   | RIQLVEEELDR              |
| 79 | gi 113678458 | vitellogenin 2 isoform 1 [Danio rerio]                      | 54.8 | 1631 | 587.59  | 1173.17 | 1172.62 | 60.66 | 0.001    | LEFEVQVGPR               |
|    |              |                                                             |      |      | 925.36  | 1848.71 | 1847.86 | 65.37 | 0.00026  | LSSENADSEIETETPVK        |
| 80 | gi 189529437 | PREDICTED: similar to plectin 1 isoform 1 [Danio rerio]     | 41.9 | 4530 | 669.70  | 2006.06 | 2004.06 | 42.99 | 0.042    | LLDAQLATGGIIDPVESH       |
|    |              |                                                             |      |      | 1032.88 | 2063.74 | 2062.11 | 98.98 | 1.10E-07 | DGHNLSLLEVLSETLPR        |
|    |              |                                                             |      |      | 1163.62 | 2325.22 | 2323.14 | 48.85 | 0.01     | IDTAEWGIDLPTVESQLGSHR    |
| 81 | gi 189529439 | PREDICTED: similar to plectin 1 isoform 2 [Danio rerio]     | 42.2 | 4506 | 669.70  | 2006.06 | 2004.06 | 42.99 | 0.042    | LLDAQLATGGIIDPVESH       |
|    |              |                                                             |      |      | 1032.88 | 2063.74 | 2062.11 | 98.98 | 1.10E-07 | DGHNLSLLEVLSETLPR        |
|    |              |                                                             |      |      | 1163.62 | 2325.22 | 2323.14 | 48.85 | 0.01     | IDTAEWGIDLPTVESQLGSHR    |
| 82 | gi 47087077  | phosphoglycerate kinase 1 [Danio rerio]                     | 63.1 | 417  | 666.83  | 1331.65 | 1331.73 | 46.32 | 0.025    | ITLPVDFITADK             |
|    |              |                                                             |      |      | 818.96  | 1635.91 | 1633.78 | 39.91 | 0.097    | LGDVYVNDAFGTAHR          |
|    |              |                                                             |      |      | 1740.87 | 1739.86 | 1739.91 | 58.16 | 0.0014   | VSHVSTGGGASLELLEGGK      |
|    |              |                                                             |      |      | 925.89  | 1849.76 | 1850.97 | 62.41 | 0.00052  | ITLPVDFITADKFDEK         |
|    |              |                                                             |      |      | 801.08  | 2400.20 | 2400.17 | 46.35 | 0.017    | QIVWNGPVGVFWDNFAHGK      |
| 83 | gi 41053939  | malate dehydrogenase 1a, NAD (soluble) [Danio rerio]        | 54.4 | 305  | 855.23  | 1708.45 | 1706.82 | 92.94 | 5.00E-07 | EIAAFDAVNDESWLK          |
|    |              |                                                             |      |      | 877.76  | 2630.26 | 2631.29 | 87.23 | 1.30E-06 | NVTIWGNHSSSTQYPDVHHAIVTI |
| 84 | gi 41282154  | aldolase a, fructose-bisphosphate [Danio rerio]             | 60.2 | 364  | 530.65  | 1059.29 | 1058.57 | 51.67 | 0.0085   | KELSDIAQR                |
|    |              |                                                             |      |      | 660.09  | 1318.16 | 1317.68 | 91.48 | 7.50E-07 | GILAADESTGSAK            |
|    |              |                                                             |      |      | 1174.96 | 2347.90 | 2347.17 | 50.36 | 0.007    | GVVPLAGTNGETTTQGLDGLYE   |
| 85 | gi 68448530  | vitellogenin 5 [Danio rerio]                                | 43.6 | 1360 | 587.59  | 1173.17 | 1172.62 | 60.66 | 0.001    | LEFEVQVGPR               |
|    |              |                                                             |      |      | 1299.73 | 1298.72 | 1298.71 | 49.73 | 0.011    | EIELTAALPSQK             |
|    |              |                                                             |      |      | 1706.13 | 1705.12 | 1705.02 | 40.57 | 0.087    | WLLDALPAVGTPVVIK         |
| 86 | gi 47550793  | nicotinamide nucleotide transhydrogenase [Danio rerio]      | 38.6 | 1079 | 1271.84 | 1270.83 | 1269.68 | 44.80 | 0.036    | SLGAEPLEVDIK             |
|    |              |                                                             |      |      | 707.70  | 1413.39 | 1412.74 | 49.47 | 0.011    | GVIHVGTYTDIPSR           |
|    |              |                                                             |      |      | 790.14  | 1578.26 | 1577.77 | 42.94 | 0.049    | QGFNVVVEGAGESAK          |
|    |              |                                                             |      |      | 922.59  | 2764.74 | 2763.39 | 66.57 | 0.00015  | DGSVVVDLAAEAGGNIETTVPG   |
| 87 | gi 71834286  | hypothetical protein LOC321166 [Danio rerio]                | 38.4 | 3730 | 637.94  | 1273.86 | 1273.71 | 79.51 | 1.20E-05 | SKVEEILSELK              |

|     |              |                                                                                |      |      |         |         |         |        |          |                           |
|-----|--------------|--------------------------------------------------------------------------------|------|------|---------|---------|---------|--------|----------|---------------------------|
| 88  | gi 66773050  | myosin, heavy polypeptide 11, smooth muscle [Danio rerio]                      | 42.9 | 1974 | 1036.97 | 3107.89 | 3105.49 | 62.90  | 0.0003   | YDAEEIEAEVSSDVTTEIHNIITTI |
|     |              |                                                                                |      |      | 808.09  | 1614.16 | 1612.69 | 40.36  | 0.089    | DLEEHLEEEEDAR             |
|     |              |                                                                                |      |      | 1000.25 | 1998.48 | 1997.92 | 83.36  | 3.90E-06 | ELEGHISDLQEDLESER         |
|     |              |                                                                                |      |      | 1066.46 | 2130.91 | 2131.00 | 57.42  | 0.0015   | QVEAERDELADELASNASGK      |
| 89  | gi 189535572 | PREDICTED: hypothetical protein [Danio rerio]                                  | 69.5 | 455  | 824.81  | 1647.61 | 1645.83 | 39.41  | 0.12     | KCPDCPGLLLPHEPK           |
|     |              |                                                                                |      |      | 654.45  | 1960.33 | 1959.96 | 51.31  | 0.0063   | FHDHRPGSVHPLGPDHR         |
| 90  | gi 47085923  | pyruvate dehydrogenase (lipoamide) beta [Danio rerio]                          | 36.5 | 359  | 880.53  | 1759.04 | 1758.94 | 75.76  | 2.50E-05 | SIRPLDADIETISITK          |
| 91  | gi 47086819  | tyrosine 3-monooxygenase/tryptophan 5-monooxygenase                            | 59.2 | 255  | 1044.76 | 2087.51 | 2086.96 | 98.21  | 1.30E-07 | AAFDDAIAELDTLSEESYK       |
| 92  | gi 45387763  | hypothetical protein LOC402975 [Danio rerio]                                   | 69   | 284  | 623.18  | 1244.35 | 1242.65 | 53.21  | 0.0055   | IQLVEEELDR                |
|     |              |                                                                                |      |      | 700.61  | 1399.21 | 1398.75 | 51.35  | 0.0072   | RIQLVEEELDR               |
|     |              |                                                                                |      |      | 709.64  | 1417.26 | 1416.75 | 48.43  | 0.015    | DAQEKLEISEKK              |
|     |              |                                                                                |      |      | 770.52  | 2308.54 | 2307.18 | 67.97  | 0.00013  | SVAKLEKTIDDELEDELYAQK     |
| 93  | gi 41055728  | ATPase, Ca++ transporting, cardiac muscle, slow twitch isoform 1 [Danio rerio] | 49.7 | 996  | 1526.85 | 1525.84 | 1524.80 | 69.48  | 0.00011  | DIVPGDIVEVAVGDK           |
|     |              |                                                                                |      |      | 765.37  | 1528.72 | 1526.87 | 36.19  | 0.24     | AIGVVVATGVNTEIGK          |
|     |              |                                                                                |      |      | 789.18  | 1576.34 | 1573.86 | 86.39  | 2.30E-06 | VDQSILTGESVSVIK           |
| 94  | gi 68433600  | PREDICTED: similar to LOC495046 protein isoform 1 [Danio rerio]                | 44.8 | 1056 | 1526.85 | 1525.84 | 1524.80 | 69.48  | 0.00011  | DIVPGDIVEVAVGDK           |
|     |              |                                                                                |      |      | 789.18  | 1576.34 | 1573.86 | 86.39  | 2.30E-06 | VDQSILTGESVSVLK           |
| 95  | gi 71892474  | ATPase, Ca++ transporting, cardiac muscle, slow twitch isoform 2 [Danio rerio] | 39.7 | 1035 | 1526.85 | 1525.84 | 1524.80 | 69.48  | 0.00011  | DIVPGDIVEVAVGDK           |
|     |              |                                                                                |      |      | 789.18  | 1576.34 | 1573.86 | 86.39  | 2.30E-06 | VDQSILTGESVSVIK           |
| 96  | gi 189526600 | PREDICTED: similar to dystonin [Danio rerio]                                   | 42   | 8365 | 1032.88 | 2063.74 | 2062.11 | 98.98  | 1.10E-07 | DGHNLISLLEVLGSETLPR       |
| 97  | gi 153792369 | si:dkey-151c10.1 [Danio rerio]                                                 | 37.6 | 4577 | 1032.88 | 2063.74 | 2062.11 | 98.98  | 1.10E-07 | DGHNLISLLEVLGSETLPR       |
| 98  | gi 68448513  | hypothetical protein LOC574004 [Danio rerio]                                   | 42.2 | 187  | 757.17  | 1512.33 | 1511.69 | 84.44  | 3.40E-06 | DQGTFFEDFVEGLR            |
| 99  | gi 47174755  | myosin light chain alkali, smooth-muscle isoform 1 [Danio rerio]               | 39.7 | 151  | 757.17  | 1512.33 | 1511.69 | 84.44  | 3.40E-06 | DQGTFFEDFVEGLR            |
| 100 | gi 189520787 | PREDICTED: tyrosine 3-monooxygenase/tryptophan 5-monooxygenase                 | 59   | 244  | 1074.12 | 2146.22 | 2143.98 | 91.19  | 6.40E-07 | TAFDEAIAELDTLNEDSYK       |
| 101 | gi 47085905  | tyrosine 3-monooxygenase/tryptophan 5-monooxygenase                            | 50.8 | 242  | 1074.12 | 2146.22 | 2143.98 | 91.19  | 6.40E-07 | TAFDEAIAELDTLNEDSYK       |
| 102 | gi 41151982  | major vault protein [Danio rerio]                                              | 55   | 863  | 1019.64 | 2037.26 | 2036.88 | 108.34 | 1.20E-08 | AVEAFIDTQGDEAEDEEER       |
|     |              |                                                                                |      |      | 713.28  | 2136.80 | 2137.12 | 52.17  | 0.005    | IPPHHYIHVLDQNTNIAR        |
| 103 | gi 18859505  | alpha-tropomyosin [Danio rerio]                                                | 47.2 | 284  | 623.18  | 1244.35 | 1242.65 | 53.21  | 0.0055   | IQLVEEELDR                |
|     |              |                                                                                |      |      | 700.61  | 1399.21 | 1398.75 | 51.35  | 0.0072   | RIQLVEEELDR               |
|     |              |                                                                                |      |      | 770.52  | 2308.54 | 2307.18 | 67.97  | 0.00013  | SVAKLEKTIDDELEDELYAQK     |
| 104 | gi 66773138  | cytochrome c oxidase subunit Vaa [Danio rerio]                                 | 75.9 | 141  | 565.40  | 1128.79 | 1128.63 | 54.53  | 0.0041   | RLDDLASAIR                |
|     |              |                                                                                |      |      | 1105.94 | 3314.79 | 3313.73 | 63.69  | 0.00023  | EIYPYVIQELRPTLDELGIATPEE  |
|     |              |                                                                                |      |      | 1693.85 | 3385.68 | 3384.77 | 50.22  | 0.0049   | EIYPYVIQELRPTLDELGIATPEE  |
| 105 | gi 46358344  | isocitrate dehydrogenase 3 (NAD+) alpha [Danio rerio]                          | 34.5 | 365  | 1251.50 | 2500.99 | 2501.23 | 87.86  | 1.20E-06 | ENTEGEYSGIEHVVDGTVVQSIK   |
| 106 | gi 24119234  | triosephosphate isomerase 1a [Danio rerio]                                     | 66.9 | 248  | 1458.87 | 1457.86 | 1457.72 | 49.98  | 0.01     | HVFGESDELIGQK             |
|     |              |                                                                                |      |      | 801.94  | 1601.87 | 1601.88 | 47.81  | 0.017    | VVLAYEPVWAIGTGK           |
|     |              |                                                                                |      |      | 808.26  | 1614.50 | 1613.82 | 63.83  | 0.0004   | RHVFGESDELIGQK            |
| 107 | gi 41054770  | WD repeat domain 1 [Danio rerio]                                               | 63   | 606  | 1296.44 | 2590.87 | 2589.21 | 86.27  | 1.60E-06 | AHDGGIYAVSWSPDSTQLISASG   |
| 108 | gi 41152346  | hypothetical protein LOC393668 [Danio rerio]                                   | 55.7 | 433  | 1147.92 | 2293.83 | 2295.13 | 40.61  | 0.067    | SGETEDTFIADLVVGLCTGQIK    |
|     |              |                                                                                |      |      | 1008.31 | 3021.90 | 3020.58 | 67.54  | 0.00011  | HIADLAGNPEVILPVPAFNVIINGC |
| 109 | gi 41152400  | peptidylprolyl isomerase A, like [Danio rerio]                                 | 43.9 | 164  | 686.49  | 1370.97 | 1370.73 | 87.95  | 1.60E-06 | VVDGLDVVDAIEK             |
| 110 | gi 41053873  | succinate dehydrogenase complex, subunit A, flavoprotein [Danio rerio]         | 65.5 | 661  | 738.51  | 1475.00 | 1473.75 | 73.92  | 4.10E-05 | KHTLSYVDPETGK             |
|     |              |                                                                                |      |      | 889.00  | 2663.98 | 2662.42 | 46.42  | 0.015    | GVGPKDKDHVHLQLHHLPPQQLA   |
| 111 | gi 27545193  | creatine kinase, brain [Danio rerio]                                           | 38.3 | 381  | 754.73  | 1507.44 | 1506.70 | 57.40  | 0.0017   | GGDDLDPNYVLSSR            |
|     |              |                                                                                |      |      | 894.58  | 1787.15 | 1785.94 | 47.27  | 0.018    | GIESLSVEALGALDGDLDK       |
|     |              |                                                                                |      |      | 990.39  | 1978.76 | 1977.94 | 66.42  | 0.00019  | GTGGVDTAAGGVFDISNADR      |
| 112 | gi 47086247  | proto galectin Gal1-L2 [Danio rerio]                                           | 38.1 | 134  | 1339.12 | 2676.23 | 2675.32 | 66.46  | 0.00016  | ITFTNEEFLVTLPDGSEIHFPNR   |
| 113 | gi 56118753  | troponin C, slow [Danio rerio]                                                 | 32.3 | 161  | 602.40  | 1202.78 | 1202.58 | 47.42  | 0.02     | AAAEQLTDEQK               |
|     |              |                                                                                |      |      | 603.43  | 1204.85 | 1202.58 | 56.44  | 0.0025   | AAAEQLTDEQK               |
|     |              |                                                                                |      |      | 684.11  | 1366.20 | 1364.65 | 62.15  | 0.00058  | NADGYIDLDELK              |
| 114 | gi 58801524  | LIM domain containing preferred translocation partner in [Danio rerio]         | 55.2 | 556  | 732.30  | 2193.86 | 2193.06 | 41.09  | 0.064    | AEP SHHPAPTPSQGYQPAPPK    |
|     |              |                                                                                |      |      | 1398.18 | 2794.34 | 2793.39 | 116.45 | 1.50E-09 | SSLDAEIDSLTSILADLESSSPYK  |

|     |              |                                                              |      |      |         |         |         |        |          |                        |
|-----|--------------|--------------------------------------------------------------|------|------|---------|---------|---------|--------|----------|------------------------|
| 115 | gj 47087349  | coagulation factor II [Danio rerio]                          | 44.3 | 524  | 674.22  | 1346.42 | 1345.80 | 77.10  | 2.10E-05 | IVAIDEIVHPK            |
|     |              |                                                              |      |      | 674.76  | 1347.50 | 1345.80 | 80.64  | 8.90E-06 | IVAIDEIVHPK            |
| 116 | gj 41055546  | hypothetical protein LOC393186 [Danio rerio]                 | 59.8 | 281  | 973.05  | 1944.09 | 1942.85 | 73.38  | 3.90E-05 | SQNGVEFNTSGSTNTDTGK    |
|     |              |                                                              |      |      | 1044.26 | 2086.51 | 2086.15 | 55.93  | 0.0021   | VNNASLIGIGYTQSLRPGVK   |
| 117 | gj 62955483  | NADH dehydrogenase (ubiquinone) Fe-S protein 3, (NAC         | 37.3 | 255  | 1179.48 | 2356.94 | 2358.17 | 88.22  | 1.20E-06 | DPVTHSQLSEFGGEYVAEILPK |
|     |              |                                                              |      |      | 1410.75 | 2819.48 | 2817.31 | 58.87  | 0.00083  | TYTDELTPLDSSVPVFQASNWY |
| 118 | gj 41055855  | aldehyde dehydrogenase 4 family, member A1 [Danio rei        | 39.2 | 556  | 1044.85 | 2087.69 | 2086.97 | 84.57  | 2.90E-06 | VGDPVEDFSTFFSAVIDDK    |
| 119 | gj 50540358  | hypothetical protein LOC436918 [Danio rerio]                 | 56.6 | 357  | 1315.03 | 2628.05 | 2626.36 | 76.50  | 1.50E-05 | QQYVDLISSLVGAEAPAVAAQP |
| 120 | gj 47777298  | inner membrane protein, mitochondrial (mitofilin) [Danio r   | 45.6 | 757  | 978.83  | 1955.65 | 1955.09 | 75.99  | 2.20E-05 | KPETVKPLQISSLSEATK     |
|     |              |                                                              |      |      | 1066.23 | 2130.45 | 2130.11 | 36.16  | 0.21     | AELDALAALTAGLEETLGSSAK |
|     |              |                                                              |      |      | 732.09  | 2193.24 | 2192.18 | 53.19  | 0.0039   | VTLQAIGAQAALTAIAAHTDK  |
| 121 | gj 40538764  | ceruloplasmin [Danio rerio]                                  | 36.8 | 1087 | 828.53  | 1655.05 | 1654.78 | 117.55 | 1.70E-09 | LVDDIVSDTFFDNR         |
| 122 | gj 41282194  | glutamate dehydrogenase 1 [Danio rerio]                      | 44.1 | 542  | 785.85  | 1569.68 | 1568.77 | 91.97  | 6.30E-07 | IIEGANGPTTPDADK        |
| 123 | gj 189535578 | PREDICTED: fetuin B [Danio rerio]                            | 42   | 498  | 1117.51 | 2233.01 | 2233.01 | 59.36  | 0.00092  | KDETHEHDHEIVLDHDK      |
|     |              |                                                              |      |      | 808.91  | 2423.70 | 2423.12 | 39.35  | 0.086    | HLLGGEVDHSHTTGSSTAHDHT |
| 124 | gj 51972166  | radixin isoform 1 [Danio rerio]                              | 41.3 | 579  | 481.06  | 960.10  | 958.59  | 46.63  | 0.028    | FVIKPIDK               |
|     |              |                                                              |      |      | 1683.89 | 1682.88 | 1682.85 | 73.28  | 4.40E-05 | NQEHLATELAELTSK        |
| 125 | gj 189522028 | PREDICTED: similar to myomesin [Danio rerio]                 | 70.7 | 923  | 1302.32 | 3903.94 | 3901.05 | 74.82  | 1.30E-05 | KGASAPWTGQIIVTEEEPVEGV |
| 126 | gj 41055654  | hypothetical protein LOC393165 isoform 2 [Danio rerio]       | 65.6 | 628  | 1025.69 | 2049.36 | 2049.07 | 51.32  | 0.0062   | KPVLETEVNHVSPLSDASK    |
|     |              |                                                              |      |      | 1079.64 | 2157.27 | 2155.09 | 92.58  | 4.70E-07 | ILAQITGTENDQAQESRPGK   |
| 127 | gj 18859045  | mitochondrial carrier homolog 2 [Danio rerio]                | 40.7 | 300  | 824.74  | 1647.47 | 1647.80 | 48.34  | 0.015    | SDEGSLQQVINETTK        |
|     |              |                                                              |      |      | 843.43  | 1684.84 | 1684.96 | 56.86  | 0.002    | VLVQVGHEPLAPTLGR       |
| 128 | gj 18859423  | spectrin, beta, erythrocytic [Danio rerio]                   | 38.1 | 2357 | 945.35  | 1888.69 | 1887.93 | 76.88  | 1.80E-05 | KKHDAIETDIAAYEER       |
|     |              |                                                              |      |      | 733.65  | 2197.91 | 2197.09 | 36.78  | 0.18     | IIDELIEGGHSESATLAEWK   |
| 129 | gj 56693302  | heat shock protein, alpha-crystallin-related, 1 [Danio reric | 46.7 | 199  | 667.37  | 1332.73 | 1332.69 | 69.63  | 0.00011  | KYTLPPGVDSEK           |
|     |              |                                                              |      |      | 921.78  | 1841.54 | 1839.94 | 54.79  | 0.003    | ISLDVNHFSPEELNVK       |
| 130 | gj 41152448  | NADH dehydrogenase (ubiquinone) 1 alpha subcomplex,          | 56.9 | 355  | 1228.12 | 2454.22 | 2454.31 | 90.23  | 6.90E-07 | LLQYSDAVEHLLTTGQGVLIER |
| 131 | gj 116004537 | hypothetical protein LOC564694 [Danio rerio]                 | 36   | 381  | 754.73  | 1507.44 | 1506.70 | 57.40  | 0.0017   | GGDDLDPNYVLSSR         |
|     |              |                                                              |      |      | 990.39  | 1978.76 | 1977.94 | 66.42  | 0.00019  | GTGGVDTAAGGVDFDISNADR  |
| 132 | gj 41055718  | fumarate hydratase precursor [Danio rerio]                   | 49.1 | 509  | 1077.99 | 2153.96 | 2153.18 | 63.34  | 0.00039  | EVHEVLLPGLQTLHDALAAK   |
|     |              |                                                              |      |      | 1251.93 | 2501.85 | 2501.26 | 77.23  | 1.40E-05 | THTQDAVPLSLGQEFGGYVQQ  |
| 133 | gj 51571925  | hypothetical protein LOC445486 [Danio rerio]                 | 43.8 | 194  | 902.31  | 1802.60 | 1800.95 | 59.54  | 0.001    | INSELPVDEVFAIVEK       |
|     |              |                                                              |      |      | 965.71  | 1929.41 | 1929.05 | 73.55  | 3.90E-05 | KINSELPVDEVFAIVEK      |
| 134 | gj 80751141  | solute carrier family 8 (sodium/calcium exchanger), meml     | 33.3 | 974  | 985.15  | 1968.29 | 1968.04 | 63.87  | 0.00035  | EGVILPIWTPVNPSPFGDK    |
|     |              |                                                              |      |      | 1212.35 | 2422.69 | 2422.06 | 42.42  | 0.043    | GGEDFEDTHGVLEFQNDISK   |
| 135 | gj 113195582 | hypothetical protein LOC556489 [Danio rerio]                 | 61.5 | 226  | 724.13  | 1446.24 | 1445.78 | 60.12  | 0.001    | VIFEAETEKPGVK          |
|     |              |                                                              |      |      | 881.73  | 2642.17 | 2641.29 | 65.66  | 0.00019  | SPDPAAVEHKPEESKPEESKPE |
| 136 | gj 41387118  | ubiquinol-cytochrome c reductase core I protein [Danio re    | 61   | 474  | 943.51  | 1885.00 | 1882.98 | 79.05  | 1.10E-05 | MVLATAGGVSHDEVVSLAK    |
|     |              |                                                              |      |      | 1307.43 | 2612.84 | 2610.26 | 57.63  | 0.0012   | KHPQSALEQAVESMGGHLNAY  |
| 137 | gj 47086479  | solute carrier family 25 (mitochondrial carrier, Aralar), me | 49.3 | 682  | 622.59  | 1243.16 | 1240.68 | 51.93  | 0.0072   | LQVAGEITTGPR           |
|     |              |                                                              |      |      | 1325.61 | 1324.60 | 1324.74 | 85.06  | 3.00E-06 | TVHLLAGVADTTK          |
| 138 | gj 189526930 | PREDICTED: similar to c-Cbl associated protein [Danio r      | 35.6 | 1015 | 918.74  | 1835.46 | 1834.94 | 67.53  | 0.00016  | HAGLVVTHQQFITNDR       |
| 139 | gj 189521338 | PREDICTED: hypothetical protein [Danio rerio]                | 49.7 | 523  | 790.64  | 1579.27 | 1577.76 | 97.12  | 1.80E-07 | YDVQVQIENVEDK          |
| 140 | gj 136429    | Trypsin precursor                                            | 63.4 | 232  | 737.73  | 2210.15 | 2210.10 | 70.33  | 7.50E-05 | LGEHNIDVLEGNEQFINAAK   |
| 141 | gj 21426835  | glucose phosphate isomerase a [Danio rerio]                  | 25   | 553  | 593.18  | 1184.34 | 1183.63 | 45.16  | 0.033    | HFVALSTNAPK            |
|     |              |                                                              |      |      | 1127.48 | 3379.42 | 3376.65 | 58.76  | 0.00069  | VNYHTGPIVWGEPTNGQHAF   |
| 142 | gj 51011067  | pyruvate kinase, muscle, b [Danio rerio]                     | 54   | 530  | 904.59  | 1807.16 | 1806.98 | 63.88  | 0.00038  | KGVNLPGANVDLPVSEK      |
|     |              |                                                              |      |      | 942.87  | 1883.72 | 1882.90 | 67.23  | 0.00016  | LNFSHGTHEYHAETIK       |
| 143 | gj 189531406 | PREDICTED: similar to nicotinamide nucleotide transhyd       | 41.1 | 679  | 553.22  | 1104.42 | 1102.64 | 47.20  | 0.022    | YKDVVVGVPK             |
|     |              |                                                              |      |      | 1153.05 | 2304.08 | 2303.11 | 75.64  | 2.10E-05 | SFGAEPLEVHIAESGEGVGGYA |
| 144 | gj 189537447 | PREDICTED: similar to Ndufa9 protein [Danio rerio]           | 36.8 | 380  | 691.30  | 1380.58 | 1379.71 | 71.30  | 7.20E-05 | FFEAAVGEAKPSK          |
|     |              |                                                              |      |      | 1079.82 | 2157.62 | 2155.10 | 42.96  | 0.043    | YDLPGLDLGITPASIEQK     |

|     |              |                                                                              |      |      |         |         |         |       |          |                          |
|-----|--------------|------------------------------------------------------------------------------|------|------|---------|---------|---------|-------|----------|--------------------------|
| 145 | gi 31044489  | heat shock 60 kD protein 1 [Danio rerio]                                     | 76.5 | 575  | 814.72  | 2441.14 | 2439.35 | 53.75 | 0.0031   | TALLDAAGVASLLSTAEAVVTEII |
|     |              |                                                                              |      |      | 942.68  | 2825.01 | 2825.53 | 73.70 | 2.70E-05 | TALLDAAGVASLLSTAEAVVTEII |
| 146 | gi 23308625  | fatty acid binding protein 3, muscle and heart [Danio rerio]                 | 63.9 | 133  | 749.63  | 1497.24 | 1496.63 | 69.94 | 9.50E-05 | LGEEFDETTADDR            |
| 147 | gi 41054603  | actinin alpha 4 [Danio rerio]                                                | 36.6 | 901  | 826.12  | 1650.22 | 1648.81 | 71.27 | 7.40E-05 | KAGTQIENIEEDFR           |
| 148 | gi 56118264  | actinin alpha 3 [Danio rerio]                                                | 31.4 | 896  | 826.12  | 1650.22 | 1648.81 | 71.27 | 7.40E-05 | KAGTQIENIEEDFR           |
| 149 | gi 46559752  | ATPase, Na+/K+ transporting, beta 1a polypeptide [Danio rerio]               | 45.4 | 306  | 700.18  | 1398.35 | 1398.75 | 68.66 | 0.00013  | REEEANLLGQIK             |
| 150 | gi 56090150  | NADH dehydrogenase (ubiquinone) Fe-S protein 1 [Danio rerio]                 | 63.5 | 731  | 1570.82 | 3139.63 | 3139.56 | 75.20 | 1.70E-05 | DSFIVYQGHGVDVGAPIADVILP  |
| 151 | gi 41056085  | keratin 8 [Danio rerio]                                                      | 26   | 520  | 545.21  | 1088.41 | 1087.55 | 50.59 | 0.011    | KLLEGEEDR                |
|     |              |                                                                              |      |      | 744.37  | 1486.73 | 1485.71 | 41.88 | 0.065    | ANLENQIAEAEER            |
|     |              |                                                                              |      |      | 1009.39 | 2016.76 | 2017.16 | 59.54 | 0.00094  | SLLAPLNLEIDPNIQIVR       |
| 152 | gi 66472610  | hypothetical protein LOC553595 [Danio rerio]                                 | 44.4 | 275  | 1284.63 | 2567.24 | 2566.31 | 88.00 | 1.10E-06 | STPTDLVTEADHQVEELIISTLR  |
| 153 | gi 189535920 | PREDICTED: similar to Filamin-A (Alpha-filamin) (Filamin A) [Danio rerio]    | 55.7 | 2523 | 824.65  | 1647.29 | 1645.89 | 49.61 | 0.011    | VHGPGLQSGITNKPNK         |
|     |              |                                                                              |      |      | 1207.46 | 2412.90 | 2411.15 | 54.31 | 0.0028   | EGPYSINVLVADEEIPQSPYK    |
|     |              |                                                                              |      |      | 1178.80 | 3533.36 | 3531.58 | 47.45 | 0.0089   | DLGDGTYQVEYTPYEEGTHSVE   |
| 154 | gi 47085999  | hypothetical protein LOC406484 [Danio rerio]                                 | 26.9 | 361  | 722.75  | 1443.49 | 1443.76 | 85.59 | 2.80E-06 | GQAFLLDLDLDPK            |
| 155 | gi 41152453  | tyrosine 3-monooxygenase/tryptophan 5-monooxygenase [Danio rerio]            | 41.2 | 245  | 782.16  | 1562.31 | 1560.73 | 50.70 | 0.0084   | AVTEGDIELSNEER           |
|     |              |                                                                              |      |      | 1073.02 | 2144.03 | 2143.98 | 56.16 | 0.002    | TAFDEAIAELDSLNEESYK      |
| 156 | gi 21426837  | glucose phosphate isomerase b [Danio rerio]                                  | 40.9 | 553  | 1127.48 | 3379.42 | 3376.65 | 58.76 | 0.00069  | VNYHTGPVWGEPTNGQHAFV     |
| 157 | gi 61806484  | hypothetical protein LOC541328 [Danio rerio]                                 | 78.4 | 116  | 839.77  | 1677.52 | 1677.88 | 62.40 | 0.00057  | TTGLVGLAVSQNPHER         |
| 158 | gi 117606266 | ATPase, Ca++ transporting, cardiac muscle, fast twitch 1 [Danio rerio]       | 50.3 | 991  | 789.18  | 1576.34 | 1573.86 | 86.39 | 2.30E-06 | VDQSILTGESVSVIK          |
| 159 | gi 189519111 | PREDICTED: similar to ATPase, Ca++ transporting, fast twitch 1 [Danio rerio] | 50   | 1005 | 789.18  | 1576.34 | 1573.86 | 86.39 | 2.30E-06 | VDQSILTGESVSVIK          |
| 160 | gi 58801528  | SET translocation (myeloid leukemia-associated) A [Danio rerio]              | 22.7 | 269  | 1098.65 | 2195.28 | 2194.01 | 56.17 | 0.002    | EQQEAIHIDEVQNEIDR        |
| 161 | gi 58801526  | SET translocation (myeloid leukemia-associated) B [Danio rerio]              | 18.5 | 275  | 1098.65 | 2195.28 | 2194.01 | 56.17 | 0.002    | EQQEAIHIDEVQNEIDR        |
| 162 | gi 57526509  | propionyl-Coenzyme A carboxylase, alpha polypeptide [Danio rerio]            | 53.7 | 709  | 825.71  | 1649.40 | 1649.84 | 62.28 | 0.00059  | TVAVHSDVDSSAVHVK         |
|     |              |                                                                              |      |      | 945.77  | 1889.53 | 1887.95 | 48.08 | 0.014    | LTGAQAVHPGYGFLSENK       |
| 163 | gi 50344731  | fibrinogen alpha chain [Danio rerio]                                         | 64.5 | 684  | 677.11  | 1352.21 | 1350.70 | 80.92 | 7.60E-06 | LGISDSEFLTAAK            |
| 164 | gi 544400460 | fibulin 5 [Danio rerio]                                                      | 40.3 | 477  | 1111.43 | 2220.84 | 2220.00 | 80.84 | 6.70E-06 | NSPLPYPEASYPEEPYPDR      |
| 165 | gi 55925387  | carnitine palmitoyltransferase II [Danio rerio]                              | 46.1 | 668  | 1127.33 | 2252.65 | 2252.11 | 56.20 | 0.0019   | YLAAQRPLLNDEQYSNTEK      |
|     |              |                                                                              |      |      | 1193.60 | 2385.19 | 2384.18 | 44.83 | 0.025    | DTTEKPLVGPQSPASVDSSSA    |
| 166 | gi 47777306  | Voltage-dependent anion channel 1 [Danio rerio]                              | 56.2 | 283  | 1045.96 | 2089.91 | 2088.16 | 80.68 | 7.30E-06 | VNNSLVGLGYTQTLKPGIK      |
| 167 | gi 52219158  | aquaporin 8 [Danio rerio]                                                    | 20.4 | 260  | 1057.84 | 2113.66 | 2113.97 | 41.95 | 0.054    | SELFTVATGDGGDNHQNQPK     |
|     |              |                                                                              |      |      | 1058.64 | 2115.26 | 2113.97 | 55.18 | 0.0026   | SELFTVATGDGGDNHQNQPK     |
| 168 | gi 113679439 | hypothetical protein LOC751638 [Danio rerio]                                 | 55.6 | 126  | 637.26  | 1272.51 | 1272.68 | 49.46 | 0.012    | GQDPYSILRPK              |
|     |              |                                                                              |      |      | 468.43  | 1402.27 | 1400.78 | 36.47 | 0.23     | KGQDPYSILRPK             |
|     |              |                                                                              |      |      | 1471.59 | 1470.58 | 1470.70 | 64.81 | 0.00032  | GIPTDDEQAAGLER           |
| 169 | gi 68362804  | PREDICTED: similar to Histone H4 replacement CG3379 [Danio rerio]            | 55.3 | 103  | 495.60  | 989.18  | 988.57  | 47.01 | 0.025    | VFLENVIR                 |
|     |              |                                                                              |      |      | 591.57  | 1181.13 | 1179.61 | 59.87 | 0.001    | ISGLIYEETR               |
| 170 | gi 41055939  | sorting and assembly machinery component 50 homolog [Danio rerio]            | 52   | 469  | 997.86  | 1993.70 | 1992.02 | 64.82 | 0.00028  | TKEDILTYEIAADVFAK        |
| 171 | gi 41386743  | eukaryotic translation elongation factor 2, like [Danio rerio]               | 57.5 | 858  | 703.72  | 1405.42 | 1404.80 | 77.74 | 1.70E-05 | TFAQLLDPIFK              |
| 172 | gi 41056123  | phosphoglycerate mutase 2 (muscle) [Danio rerio]                             | 55.7 | 255  | 827.80  | 1653.58 | 1653.91 | 71.00 | 7.40E-05 | ALPFWNEVIVPEIK           |
| 173 | gi 18858399  | cadherin 2, neuronal [Danio rerio]                                           | 26.2 | 783  | 1148.25 | 3441.71 | 3440.82 | 76.41 | 1.10E-05 | YSVTGPGADQNPTGLFIIDPISGI |
| 174 | gi 189530625 | PREDICTED: similar to spectrin repeat containing, nuclear [Danio rerio]      | 41.4 | 8621 | 550.38  | 1098.74 | 1097.66 | 63.31 | 0.00054  | QLADAIKLR                |
| 175 | gi 50540420  | branched chain aminotransferase 2, mitochondrial [Danio rerio]               | 31.3 | 415  | 900.83  | 1799.64 | 1799.02 | 46.62 | 0.02     | SSVLKPKPDPSTLVFGK        |
| 176 | gi 68389723  | PREDICTED: catechol-O-methyltransferase domain containing [Danio rerio]      | 81.9 | 238  | 778.40  | 1554.79 | 1553.87 | 76.16 | 2.40E-05 | KGIVAVDNLVWGGRR          |
| 177 | gi 189538855 | PREDICTED: similar to sarcalumenin [Danio rerio]                             | 23.4 | 882  | 731.19  | 1460.36 | 1459.77 | 63.21 | 0.00049  | VTFVDTPGIENR             |
|     |              |                                                                              |      |      | 783.21  | 1564.40 | 1564.67 | 41.58 | 0.068    | SEELSQEEAASEEK           |
| 178 | gi 189525434 | PREDICTED: im:7157373 [Danio rerio]                                          | 55   | 545  | 1430.98 | 2859.95 | 2859.32 | 74.75 | 2.10E-05 | SAAAPPKEEAPPANAPDGDAPA   |
| 179 | gi 68444185  | PREDICTED: cytochrome c oxidase subunit Vab [Danio rerio]                    | 67.4 | 172  | 565.40  | 1128.79 | 1127.64 | 45.39 | 0.034    | RLNDLASAIR               |
|     |              |                                                                              |      |      | 1106.47 | 3316.39 | 3314.75 | 67.87 | 8.70E-05 | EIYPYVIQELKPTLQELGISTPEE |
| 180 | gi 123706335 | hypothetical protein LOC791136 [Danio rerio]                                 | 50.5 | 313  | 1223.67 | 2445.33 | 2443.21 | 48.42 | 0.011    | QILANPFQDYVNTHPVSHAHR    |
|     |              |                                                                              |      |      | 1296.63 | 2591.25 | 2589.22 | 42.49 | 0.038    | GTKDDPIEPQQAIPDAQSFEFER  |
| 181 | gi 168229163 | cysteine-rich protein 2 [Danio rerio]                                        | 76.2 | 206  | 990.03  | 2967.06 | 2968.41 | 48.11 | 0.0093   | TLTAGGHAHDGKPYCHKPCYV    |

|     |              |                                                                   |      |      |         |         |         |       |          |                         |
|-----|--------------|-------------------------------------------------------------------|------|------|---------|---------|---------|-------|----------|-------------------------|
| 182 | gi 62122813  | 3-hydroxyisobutyryl-Coenzyme A hydrolase [Danio rerio]            | 49   | 382  | 999.96  | 2996.84 | 2996.41 | 42.81 | 0.031    | TLAAGSHAEHDGQPYCHKPCY/  |
| 183 | gi 52219190  | hypothetical protein LOC447942 [Danio rerio]                      | 57.3 | 103  | 897.46  | 1792.91 | 1790.92 | 71.86 | 6.20E-05 | WKPSTLAGVSEQFVDK        |
| 184 | gi 189517274 | PREDICTED: hypothetical protein [Danio rerio]                     | 33   | 797  | 1167.53 | 3499.56 | 3500.62 | 52.81 | 0.0025   | TKPWPWGDGNHSLFHNPHNTNA  |
| 185 | gi 18858281  | apolipoprotein A-I [Danio rerio]                                  | 42   | 262  | 602.97  | 1203.92 | 1201.66 | 58.26 | 0.0016   | MRNLTEGILR              |
| 186 | gi 50540186  | hypothetical protein LOC436833 [Danio rerio]                      | 32.3 | 229  | 822.99  | 1643.96 | 1643.73 | 71.47 | 6.90E-05 | ALDNLDTDYEQYK           |
| 187 | gi 150378483 | heat shock protein, alpha-crystallin-related, b11 [Danio rerio]   | 47.8 | 205  | 1079.82 | 2157.63 | 2156.16 | 60.52 | 0.00075  | AGLTASEVDELLTLATSQPIK   |
| 188 | gi 41393141  | tropomyosin 3 [Danio rerio]                                       | 59.3 | 248  | 1113.16 | 2224.31 | 2223.99 | 70.86 | 6.80E-05 | NPALQNSEPENQAVEAEAAEN   |
| 189 | gi 49274617  | tropomyosin 1 alpha [Danio rerio]                                 | 40.8 | 284  | 623.18  | 1244.35 | 1242.65 | 53.21 | 0.0055   | IQLVEEELDR              |
| 190 | gi 50344790  | hypothetical protein LOC415158 [Danio rerio]                      | 38.5 | 104  | 700.61  | 1399.21 | 1398.75 | 51.35 | 0.0072   | RIQLVEEELDR             |
| 191 | gi 57528846  | hypothetical protein LOC445255 [Danio rerio]                      | 50.2 | 207  | 745.36  | 1488.71 | 1487.65 | 60.28 | 0.00096  | TGQAEGFSYTDANK          |
| 192 | gi 70778808  | vesicle amine transport protein 1 [Danio rerio]                   | 47.5 | 484  | 770.14  | 1538.26 | 1537.87 | 69.95 | 9.50E-05 | AEEDKIPLLLVGNK          |
| 193 | gi 189517050 | PREDICTED: glycine C-acetyltransferase [Danio rerio]              | 69.4 | 458  | 904.58  | 1807.15 | 1806.90 | 69.69 | 0.0001   | HEVISQGGVTHPIDYR        |
| 194 | gi 114326248 | elastin b [Danio rerio]                                           | 16.6 | 2054 | 785.77  | 1569.52 | 1568.74 | 69.25 | 0.00012  | VQISAAHTDEDIDR          |
| 195 | gi 189528827 | PREDICTED: similar to LOC567732 protein [Danio rerio]             | 43.1 | 1368 | 888.60  | 1775.19 | 1772.86 | 68.41 | 0.00015  | SYGGAGALGGAGQGGGIGGGPC  |
| 196 | gi 189516653 | PREDICTED: myosin, heavy chain 9, non-muscle like-1,              | 39.7 | 1754 | 1212.77 | 2423.53 | 2422.19 | 68.39 | 0.00011  | GQNHLEEVELAFPQNVIEGSGR  |
| 197 | gi 41055614  | hypothetical protein LOC393478 [Danio rerio]                      | 15.1 | 86   | 575.38  | 1723.12 | 1721.89 | 38.26 | 0.14     | KQELEEILHDLER           |
| 198 | gi 41054571  | citrate synthase [Danio rerio]                                    | 24.6 | 468  | 958.30  | 1914.58 | 1913.91 | 68.34 | 0.00013  | HSQAFDELNEQLEQVK        |
| 199 | gi 27545305  | laminin, gamma 1 [Danio rerio]                                    | 55.8 | 1593 | 1465.66 | 1464.65 | 1464.65 | 41.10 | 0.076    | WDSQIEDGSFPGK           |
| 200 | gi 55742559  | Rho GDP dissociation inhibitor (GDI) alpha [Danio rerio]          | 45.8 | 203  | 733.65  | 1465.28 | 1464.65 | 61.22 | 0.00072  | WDSQIEDGSFPGK           |
| 201 | gi 121583986 | hypothetical protein LOC557972 [Danio rerio]                      | 35.6 | 562  | 564.10  | 1126.18 | 1126.65 | 40.48 | 0.094    | ALGFPLERPK              |
| 202 | gi 41152334  | ATP synthase, H+ transporting, mitochondrial F0 comple:           | 59.6 | 161  | 881.85  | 1761.69 | 1761.88 | 63.55 | 0.00043  | GLVYETSVLDPDEGIR        |
| 203 | gi 41053347  | mitochondrial trifunctional protein, beta subunit [Danio rerio]   | 48.8 | 471  | 1175.40 | 2348.79 | 2346.18 | 66.83 | 0.00016  | LLDLQNLIDSLDNTETTVDK    |
| 204 | gi 189522849 | PREDICTED: similar to oxoglutarate (alpha-ketoglutarate           | 49   | 961  | 960.67  | 1919.32 | 1916.90 | 52.99 | 0.0044   | SLQEIQLDQDDESLR         |
| 205 | gi 189527793 | PREDICTED: wu:fb05a01 [Danio rerio]                               | 52.1 | 6009 | 1023.83 | 2045.64 | 2044.99 | 51.22 | 0.0065   | SLQEIQLDQDDESLRK        |
| 206 | gi 148596955 | ATP synthase, H+ transporting, mitochondrial F0 comple:           | 69   | 71   | 1071.25 | 2140.48 | 2138.14 | 66.20 | 0.0002   | TFLVIPELAQELHVWTDK      |
| 207 | gi 189518755 | PREDICTED: similar to malic enzyme 2, NAD(+)-depend               | 59.9 | 581  | 573.43  | 1144.85 | 1144.54 | 66.01 | 0.00029  | IDAQEQEANK              |
| 208 | gi 41056175  | programmed cell death 8 (apoptosis-inducing factor) [Danio rerio] | 43.4 | 751  | 710.16  | 1418.30 | 1415.77 | 65.85 | 0.00027  | DQLLLGPTYATPK           |
| 209 | gi 57525836  | hypothetical protein LOC445175 [Danio rerio]                      | 62.3 | 697  | 834.04  | 1666.06 | 1665.82 | 38.69 | 0.13     | VITDDGPPAQNPSEVK        |
| 210 | gi 189526598 | PREDICTED: similar to COASTER [Danio rerio]                       | 54.5 | 916  | 1201.44 | 2400.87 | 2399.32 | 54.83 | 0.0025   | NITLSLVANPSHLEAVNPVVQGR |
| 211 | gi 113678983 | hypothetical protein LOC751707 [Danio rerio]                      | 45.7 | 606  | 579.12  | 1156.23 | 1155.65 | 54.20 | 0.0042   | LKGDVDVSVPK             |
| 212 | gi 189515773 | PREDICTED: amylo-1, 6-glucosidase, 4-alpha-glucanotr:             | 45.3 | 1532 | 1033.94 | 2065.86 | 2062.98 | 46.95 | 0.017    | SDASLSGGIENQEGNLTFPK    |
| 213 | gi 41053732  | aldehyde dehydrogenase 2 precursor [Danio rerio]                  | 38.6 | 516  | 816.74  | 1631.46 | 1631.83 | 43.32 | 0.048    | RYDNLKPIAEER            |
| 214 | gi 189538766 | PREDICTED: similar to mitogen-activated protein kinase-           | 32   | 535  | 817.37  | 1632.73 | 1631.83 | 63.17 | 0.00049  | RYDNLKPIAEER            |
| 215 | gi 41055658  | 3-hydroxyisobutyrate dehydrogenase b [Danio rerio]                | 52.3 | 329  | 1093.78 | 2185.54 | 2184.23 | 53.23 | 0.004    | SFLDAVNVIKPTAIIIGVSGAGR |
| 216 | gi 47271384  | cofilin 2, like [Danio rerio]                                     | 40.6 | 165  | 736.65  | 1471.28 | 1471.66 | 64.47 | 0.00036  | SAGLEVDSDFGGYR          |
| 217 | gi 189533438 | PREDICTED: novel protein similar to vertebrate apolipop           | 44.1 | 2633 | 1302.96 | 1301.95 | 1301.66 | 64.35 | 0.00039  | SHIDELYANIK             |
| 218 | gi 189532432 | PREDICTED: novel protein similar to vertebrate AT rich ii         | 31.2 | 2113 | 657.73  | 1313.44 | 1312.78 | 53.00 | 0.0052   | QAVALSLEARK             |
| 219 | gi 189532434 | PREDICTED: im:7160733 [Danio rerio]                               | 34.8 | 1248 | 1090.76 | 2179.50 | 2179.07 | 64.20 | 0.00031  | GGENIYPAEIEQFLHTHPK     |
| 220 | gi 125828659 | PREDICTED: hypothetical protein LOC449551 [Danio rerio]           | 38.1 | 126  | 894.83  | 1787.64 | 1787.00 | 63.95 | 0.00039  | GLPALIQDHPHLHAIR        |
| 221 | gi 189514551 | PREDICTED: sorbin and SH3 domain containing 2a [Danio rerio]      | 35.1 | 2115 | 778.04  | 2331.08 | 2330.19 | 63.12 | 0.00038  | VAFTGSTDVGHLIQQASSASNLH |
| 222 | gi 54400426  | ATP synthase, H+ transporting, mitochondrial F0 comple:           | 68.7 | 252  | 778.04  | 2331.08 | 2330.19 | 63.12 | 0.00038  | VAFTGSTDVGHLIQQASSASNLH |
| 223 | gi 113678245 | hypothetical protein LOC558738 [Danio rerio]                      | 62.2 | 111  | 865.98  | 1729.95 | 1729.95 | 62.94 | 0.00049  | KGSLIDSSTIDPAVSK        |



|     |              |                                                                 |      |      |         |         |         |       |         |                         |
|-----|--------------|-----------------------------------------------------------------|------|------|---------|---------|---------|-------|---------|-------------------------|
| 224 | gi 68444865  | PREDICTED: dodecenoyl-Coenzyme A delta isomerase                | 39.5 | 301  | 663.69  | 1325.37 | 1325.71 | 52.34 | 0.0058  | IGLVDELVPEDK            |
| 225 | gi 41152175  | ribosomal protein S7 [Danio rerio]                              | 35.1 | 194  | 733.47  | 1464.93 | 1464.94 | 60.08 | 0.00094 | KAIIFVVPVQLK            |
| 226 | gi 189516256 | PREDICTED: similar to phosphofructokinase, platelet [Dre        | 49.4 | 782  | 707.25  | 1412.48 | 1411.69 | 59.91 | 0.00099 | DLQSNVEHLTEK            |
| 227 | gi 57525624  | malic enzyme 2, NAD(+)-dependent, mitochondrial [Danio          | 56.5 | 581  | 1093.78 | 2185.54 | 2184.23 | 53.23 | 0.004   | SFLDAVNVIKPTAIGVSGAGR   |
| 228 | gi 61806580  | hypothetical protein LOC541378 [Danio rerio]                    | 48.7 | 448  | 780.37  | 1558.73 | 1557.89 | 48.92 | 0.013   | LLEVIDGHIPLPSR          |
|     |              |                                                                 |      |      | 920.26  | 1838.50 | 1836.96 | 44.61 | 0.031   | DKPHLNIGTIGHVDHGK       |
| 229 | gi 52219010  | EH-domain containing 3, like [Danio rerio]                      | 35.2 | 532  | 853.20  | 1704.38 | 1703.91 | 58.84 | 0.0013  | KKDPELFQTVSDGLK         |
| 230 | gi 125854185 | PREDICTED: hypothetical protein [Danio rerio]                   | 15.7 | 645  | 672.86  | 1343.71 | 1346.62 | 48.88 | 0.014   | EEEEEQLKADK             |
| 231 | gi 61806608  | hypothetical protein LOC541390 [Danio rerio]                    | 60   | 110  | 1161.83 | 2321.64 | 2319.22 | 58.56 | 0.0011  | NSVWLGLLGWANAVLHNSVNR   |
| 232 | gi 74315945  | hypothetical protein LOC613246 [Danio rerio]                    | 51.9 | 422  | 1048.40 | 2094.79 | 2092.98 | 58.42 | 0.0012  | ALVGNASEELQSADGNPHR     |
| 233 | gi 125842393 | PREDICTED: zgc:103738 [Danio rerio]                             | 57.1 | 77   | 987.76  | 2960.25 | 2961.35 | 52.44 | 0.0035  | TLSAGSHAEHEGKPYCNNPCY/  |
| 234 | gi 47086875  | glutamate dehydrogenase 1a [Danio rerio]                        | 33.5 | 544  | 862.40  | 1722.79 | 1722.87 | 57.43 | 0.0018  | HGGAIPVPTSDFQER         |
| 235 | gi 47551331  | hypothetical protein LOC407980 [Danio rerio]                    | 52.3 | 331  | 978.50  | 1954.99 | 1952.12 | 57.82 | 0.0014  | EIFLSQPILLELEAPLK       |
| 236 | gi 123858772 | protein phosphatase 1, catalytic subunit, beta [Danio rerio]    | 21.4 | 327  | 978.50  | 1954.99 | 1952.12 | 57.82 | 0.0014  | EIFLSQPILLELEAPLK       |
| 237 | gi 189518709 | PREDICTED: wu:fi22e08 [Danio rerio]                             | 49.8 | 323  | 978.50  | 1954.99 | 1952.12 | 57.82 | 0.0014  | EIFLSQPILLELEAPLK       |
| 238 | gi 56693257  | hypothetical protein LOC494050 [Danio rerio]                    | 48.9 | 368  | 1035.13 | 3102.35 | 3100.58 | 51.88 | 0.0038  | ILLDQGGQEHVETPHGVLHVTVI |
| 239 | gi 47550715  | heterogeneous nuclear ribonucleoprotein A0 [Danio rerio]        | 28.3 | 314  | 843.62  | 1685.23 | 1683.72 | 57.64 | 0.0016  | GFGFVHFEDNDSADK         |
| 240 | gi 41056209  | hypothetical protein LOC393532 [Danio rerio]                    | 35.1 | 490  | 1012.59 | 2023.16 | 2022.00 | 56.97 | 0.0017  | HILDTHGLDPHQATASGPR     |
| 241 | gi 189532998 | PREDICTED: similar to calmodulin 2 [Danio rerio]                | 21.7 | 152  | 923.68  | 1845.34 | 1843.88 | 56.77 | 0.0019  | EAFSLFDKDGDTITTK        |
| 242 | gi 41053611  | hypothetical protein LOC393828 [Danio rerio]                    | 33.8 | 213  | 1200.94 | 2399.87 | 2399.16 | 56.18 | 0.0018  | SYHSPWEEAIINDPTLADTLK   |
| 243 | gi 38707985  | electron-transfer-flavoprotein, alpha polypeptide [Danio rerio] | 70.3 | 333  | 713.59  | 1425.17 | 1424.81 | 56.10 | 0.0024  | LDVAPISDIEIK            |
| 244 | gi 41053746  | RNA binding protein with multiple splicing 2 [Danio rerio]      | 39.5 | 200  | 772.69  | 1543.36 | 1542.88 | 56.08 | 0.0025  | TLFVSGGLPTDIKPR         |
| 245 | gi 41393119  | valosin containing protein [Danio rerio]                        | 56.1 | 806  | 905.89  | 1809.76 | 1809.99 | 55.96 | 0.0023  | NAPAIIFIDELDAIPK        |
| 246 | gi 56790313  | homeo box B9a [Danio rerio]                                     | 20.8 | 255  | 710.16  | 1418.30 | 1416.74 | 55.87 | 0.0027  | MEPLLGHLGEPK            |
| 247 | gi 44917595  | alcohol dehydrogenase 8b [Danio rerio]                          | 70.7 | 376  | 966.09  | 2895.25 | 2894.48 | 55.82 | 0.0016  | GFPTILGHEAAGVVESVGPVTI  |
| 248 | gi 154707842 | methylmalonyl Coenzyme A mutase [Danio rerio]                   | 42.1 | 757  | 786.15  | 1570.29 | 1568.84 | 47.95 | 0.016   | NTQIIIQEEGIPK           |
|     |              |                                                                 |      |      | 976.35  | 1950.69 | 1948.02 | 44.18 | 0.032   | TPEGISIKPVYTQTD TAK     |
| 249 | gi 62955301  | hypothetical protein LOC550355 [Danio rerio]                    | 41.6 | 255  | 925.67  | 1849.32 | 1848.92 | 55.56 | 0.0025  | VLPQVDVTVGHEEQGGK       |
| 250 | gi 56693297  | hypothetical protein LOC494070 [Danio rerio]                    | 58.2 | 182  | 952.62  | 1903.22 | 1902.91 | 55.04 | 0.0027  | AKEEQELADKEDEK          |
| 251 | gi 51467909  | ATP synthase, H+ transporting, mitochondrial F1 comple          | 66   | 209  | 920.66  | 1839.30 | 1838.03 | 54.42 | 0.0033  | VSPITINLINVLENGR        |
| 252 | gi 80751159  | hypothetical protein LOC641325 [Danio rerio]                    | 43.8 | 313  | 1296.63 | 2591.25 | 2589.22 | 42.49 | 0.038   | GTKDDPIEPQQAIPDAQSFEFEK |
| 253 | gi 50539806  | hypothetical protein LOC436642 [Danio rerio]                    | 27.6 | 323  | 976.35  | 1950.69 | 1950.01 | 53.72 | 0.0036  | ALESAYGSEKPSLTSAAIR     |
| 254 | gi 66472400  | NADH dehydrogenase (ubiquinone) Fe-S protein 4, (NAC            | 48.2 | 168  | 827.09  | 1652.17 | 1650.88 | 53.50 | 0.0042  | LDISTLTGVPEEHIK         |
| 255 | gi 125995404 | DEAD (Asp-Glu-Ala-Asp) box polypeptide 3 [Danio rerio]          | 52   | 709  | 695.11  | 2082.30 | 2082.02 | 53.31 | 0.0038  | HVINFDLPSDIEEYVHR       |
| 256 | gi 41282082  | p110 [Danio rerio]                                              | 50.6 | 688  | 695.11  | 2082.30 | 2082.02 | 53.31 | 0.0038  | HVINFDLPSDIEEYVHR       |
| 257 | gi 55742591  | telomerase binding protein, p23 [Danio rerio]                   | 45.3 | 159  | 974.86  | 1947.70 | 1944.92 | 53.01 | 0.0043  | HHNEVDLLEAIDPNDSK       |
| 258 | gi 55926092  | heat shock 10kD protein 1 (chaperonin 10) [Danio rerio]         | 34   | 100  | 770.78  | 1539.54 | 1539.86 | 52.40 | 0.0054  | VLQATVVAVGPGSTNK        |
| 259 | gi 52218912  | enoyl Coenzyme A hydratase, short chain, 1, mitochondr          | 36.1 | 291  | 1056.69 | 2111.36 | 2110.12 | 52.29 | 0.005   | AQFGQPEILLGTIPGAGGTQR   |
| 260 | gi 189532637 | PREDICTED: similar to Calcium-binding mitochondrial ca          | 45.1 | 774  | 622.59  | 1243.16 | 1240.68 | 51.93 | 0.0072  | LQVAGEITTGPR            |
| 261 | gi 30410758  | keratin 18 [Danio rerio]                                        | 54.5 | 431  | 1000.00 | 1997.99 | 1998.02 | 51.86 | 0.0055  | GNIQHQTQEYEALLNIK       |
| 262 | gi 27545251  | solute carrier family 25 alpha, member 5 [Danio rerio]          | 48   | 298  | 617.63  | 1233.24 | 1232.68 | 51.16 | 0.0084  | DFLAGGIAAAISK           |
| 263 | gi 167621510 | hypothetical protein LOC100136853 [Danio rerio]                 | 28.5 | 424  | 654.89  | 1307.76 | 1306.71 | 46.23 | 0.023   | KNSSSLKSTIDK            |
|     |              |                                                                 |      |      | 655.46  | 1308.91 | 1306.71 | 47.37 | 0.018   | KNSSSLKSTIDK            |
| 264 | gi 68357456  | PREDICTED: similar to mCG1046517 [Danio rerio]                  | 51.4 | 1561 | 766.34  | 1530.67 | 1530.94 | 47.44 | 0.018   | LLEKSKELAFILK           |
| 265 | gi 59933260  | cardiomyopathy associated 1 [Danio rerio]                       | 55   | 2297 | 915.95  | 1829.89 | 1827.92 | 51.47 | 0.0066  | SHTWLFETQPLDNIK         |
| 266 | gi 53292609  | clathrin, heavy polypeptide a (Hc) [Danio rerio]                | 35   | 1680 | 1170.75 | 2339.48 | 2338.23 | 51.37 | 0.0057  | ISGETIFVTAPHDATAGIIGVNR |
| 267 | gi 57770449  | hypothetical protein LOC393165 isoform 1 [Danio rerio]          | 52.3 | 197  | 1025.69 | 2049.36 | 2049.07 | 51.32 | 0.0062  | KPVLETEVNHVSPLSDASK     |
| 268 | gi 50344970  | hypothetical protein LOC415247 [Danio rerio]                    | 41.4 | 382  | 604.82  | 1207.63 | 1205.69 | 50.73 | 0.0088  | HNNLDLVIIR              |
| 269 | gi 189523865 | PREDICTED: myosin 1b-like 2 [Danio rerio]                       | 44.3 | 1078 | 752.61  | 2254.79 | 2255.13 | 46.51 | 0.018   | SLRHQDKDQCILITGESGAGK   |
| 270 | gi 18858981  | lamin b2 [Danio rerio]                                          | 64.5 | 583  | 545.21  | 1088.41 | 1087.55 | 50.59 | 0.011   | KLLEGEEDR               |
| 271 | gi 125849603 | PREDICTED: similar to keratin 8 [Danio rerio]                   | 41.1 | 438  | 545.21  | 1088.41 | 1087.55 | 50.59 | 0.011   | KLLEGEEDR               |
| 272 | gi 189523135 | PREDICTED: similar to type II keratin E1 [Danio rerio]          | 27.3 | 311  | 545.21  | 1088.41 | 1087.55 | 50.59 | 0.011   | KLLEGEEDR               |



|     |              |                                                                     |      |      |         |         |         |       |        |                          |
|-----|--------------|---------------------------------------------------------------------|------|------|---------|---------|---------|-------|--------|--------------------------|
| 273 | gi 157743314 | NADH dehydrogenase (ubiquinone) 1 beta subcomplex 5                 | 33.3 | 186  | 866.17  | 1730.33 | 1729.87 | 50.53 | 0.0085 | EKGDGPWFQIPTIDK          |
| 274 | gi 37497110  | ribophorin I [Danio rerio]                                          | 47   | 598  | 813.09  | 2436.23 | 2435.30 | 50.20 | 0.0069 | VETVFSHVLKPFPTHITQAER    |
| 275 | gi 189516116 | PREDICTED: similar to ribophorin I [Danio rerio]                    | 29.3 | 505  | 813.09  | 2436.23 | 2435.30 | 50.20 | 0.0069 | VETVFSHVLKPFPTHITQAER    |
| 276 | gi 62955727  | NADH dehydrogenase (ubiquinone) 1 beta subcomplex, !                | 22.3 | 175  | 814.41  | 1626.81 | 1625.79 | 50.13 | 0.0093 | EVQQLQSETPADGPK          |
| 277 | gi 54261767  | succinate-CoA ligase, ADP-forming, beta subunit [Danio              | 58.2 | 466  | 1294.16 | 2586.30 | 2585.29 | 50.09 | 0.0067 | LHGGTPANFLDVGGGATAQQV    |
| 278 | gi 68379126  | PREDICTED: hypothetical protein LOC767664 [Danio rerio]             | 80.2 | 81   | 1494.87 | 1493.86 | 1493.82 | 50.07 | 0.0093 | IFLEDNGLPVIHK            |
| 279 | gi 162138946 | hypothetical protein LOC562705 [Danio rerio]                        | 52.8 | 307  | 549.17  | 1096.33 | 1094.59 | 49.23 | 0.012  | KYGSVTVWR                |
| 280 | gi 112363126 | dynein, cytoplasmic 1, heavy chain 1 [Danio rerio]                  | 36   | 4643 | 843.40  | 2527.16 | 2526.32 | 49.04 | 0.0088 | VLRPQVSAVPQHAQGESAEPAL   |
| 281 | gi 189533132 | PREDICTED: A kinase anchor protein 12 [Danio rerio]                 | 46.4 | 1533 | 1075.96 | 3224.86 | 3224.59 | 48.92 | 0.0074 | QSSVIVQEIIQNVVENFAEAHGE  |
| 282 | gi 18859107  | non-metastatic cells 2, protein (NM23B) expressed in [Danio         | 62.7 | 153  | 1088.81 | 3263.40 | 3261.62 | 48.41 | 0.0082 | NIIHGSDSVDSANTEISLWFKPEI |
| 283 | gi 47087201  | RIO kinase 2 [Danio rerio]                                          | 24   | 512  | 896.26  | 1790.51 | 1790.03 | 47.93 | 0.016  | NHEIVPVSLIASIASLK        |
| 284 | gi 189545630 | PREDICTED: hypothetical protein [Danio rerio]                       | 31.3 | 403  | 1429.65 | 1428.64 | 1427.78 | 47.74 | 0.017  | LYEVFIKNFQK              |
| 285 | gi 47086529  | hypothetical protein LOC336641 [Danio rerio]                        | 40.2 | 184  | 891.22  | 1780.42 | 1777.96 | 47.58 | 0.017  | GLDVDSLVIHQVQNK          |
| 286 | gi 160333682 | heat shock protein 8 [Danio rerio]                                  | 43   | 649  | 1131.27 | 2260.52 | 2259.14 | 47.51 | 0.014  | SINPDEAVAYGAAVQAAILSGDK  |
| 287 | gi 130494136 | ubiquitin-conjugating enzyme E2L 3, like [Danio rerio]              | 58.4 | 190  | 828.62  | 2482.83 | 2482.32 | 47.47 | 0.013  | TDQVIQSLIALVNDPQPEHPLR   |
| 288 | gi 57222259  | talin 1 [Danio rerio]                                               | 52.9 | 2538 | 1059.58 | 3175.71 | 3174.57 | 47.34 | 0.011  | EAVDDLGLSTLAEVASAAGAVGC  |
| 289 | gi 55925219  | sorting and assembly machinery component 50 homolog, isoform 1      | 48.8 | 469  | 768.63  | 1535.24 | 1533.83 | 47.24 | 0.018  | DVVVQHVNIQGLGR           |
| 290 | gi 51467931  | enolase 2 [Danio rerio]                                             | 61.5 | 434  | 1147.92 | 2293.83 | 2295.13 | 40.61 | 0.067  | SGETEDTFIADLVVGLCTGQIK   |
|     |              |                                                                     |      |      | 1008.90 | 3023.68 | 3024.58 | 36.03 | 0.15   | HIADLAGNTELVLPVPAFNVINGI |
| 291 | gi 47086623  | monocarboxylate transporter 4 [Danio rerio]                         | 65   | 508  | 946.72  | 1891.42 | 1889.91 | 47.08 | 0.017  | ELESIEVDSIEVENASK        |
| 292 | gi 71892458  | villin 2 [Danio rerio]                                              | 45.6 | 583  | 481.06  | 960.10  | 958.59  | 46.63 | 0.028  | FVIKPIDK                 |
| 293 | gi 189527553 | PREDICTED: hypothetical protein LOC553434 [Danio rerio]             | 37.5 | 568  | 481.06  | 960.10  | 958.59  | 46.63 | 0.028  | FVIKPIDK                 |
| 294 | gi 189519969 | PREDICTED: myosin, heavy polypeptide 10, non-muscle isoform 1       | 41.9 | 1973 | 580.54  | 1738.58 | 1737.89 | 46.55 | 0.021  | KQELEEILHDLESR           |
| 295 | gi 189519965 | PREDICTED: similar to nonmuscle myosin heavy chain IIA              | 40.6 | 1857 | 580.54  | 1738.58 | 1737.89 | 46.55 | 0.021  | KQELEEILHDLESR           |
| 296 | gi 189522138 | PREDICTED: similar to paxillin [Danio rerio]                        | 43.6 | 527  | 1147.86 | 2293.70 | 2294.99 | 42.47 | 0.044  | TWHPEHFVCTHCQEEIGSR      |
| 297 | gi 61651682  | fibronectin 1b [Danio rerio]                                        | 47.3 | 2408 | 806.73  | 2417.17 | 2416.31 | 46.22 | 0.018  | SAPLVGTATTQLISGLPSLPSHG  |
| 298 | gi 50539996  | peroxiredoxin 2 [Danio rerio]                                       | 69.5 | 197  | 1318.69 | 2635.36 | 2634.36 | 36.61 | 0.15   | IGVELIAASTDSHFSLAWINTPF  |
| 299 | gi 113678121 | ATPase inhibitory factor 1-like [Danio rerio]                       | 43   | 107  | 655.66  | 1309.30 | 1308.60 | 46.03 | 0.024  | HHQEEIDHHK               |
| 300 | gi 125832496 | PREDICTED: similar to mCG2694 [Danio rerio]                         | 33.1 | 308  | 550.57  | 1099.13 | 1098.61 | 44.93 | 0.037  | QLADALKANR               |
| 301 | gi 189523776 | PREDICTED: hypothetical protein LOC798920 isoform 1                 | 80   | 265  | 685.11  | 1368.20 | 1367.61 | 45.43 | 0.027  | TRMYNTQDDPK              |
| 302 | gi 50233897  | FLJ12716-like protein [Danio rerio]                                 | 39.9 | 1132 | 596.22  | 1190.42 | 1187.63 | 45.26 | 0.034  | TAYSLVHELK               |
| 303 | gi 189525785 | PREDICTED: similar to AT rich interactive domain 5B (MIM) isoform 1 | 44.6 | 935  | 1080.49 | 1079.48 | 1077.58 | 36.93 | 0.21   | LGGYEVITAR               |
|     |              |                                                                     |      |      | 673.32  | 1344.62 | 1344.72 | 45.14 | 0.032  | KQEGSVQESIHK             |
| 304 | gi 61806508  | signal peptidase complex subunit 2 homolog [Danio rerio]            | 54.2 | 201  | 650.50  | 1298.98 | 1299.73 | 45.04 | 0.032  | AARNGKNSILEK             |
| 305 | gi 189532951 | PREDICTED: hypothetical protein [Danio rerio]                       | 41.1 | 570  | 1001.67 | 2001.32 | 2000.01 | 44.93 | 0.027  | YVIDTSDVVTNYKELNK        |
| 306 | gi 189523571 | PREDICTED: similar to mcf.2 transforming sequence-like protein 1    | 44.3 | 929  | 889.20  | 1776.39 | 1774.95 | 44.83 | 0.033  | ESSPLFAADVITELKR         |
| 307 | gi 189523947 | PREDICTED: similar to Poly [ADP-ribose] polymerase 14               | 72   | 683  | 788.66  | 1575.31 | 1572.84 | 44.72 | 0.034  | LLDCKDGLGLVLEK           |
| 308 | gi 125850307 | PREDICTED: CFH protein [Danio rerio]                                | 64.8 | 751  | 1101.66 | 2201.30 | 2200.96 | 44.39 | 0.031  | DDITYENVEPVSEASYADGK     |
| 309 | gi 189528635 | PREDICTED: similar to odorant receptor [Danio rerio]                | 27.9 | 305  | 797.72  | 1593.43 | 1591.89 | 44.35 | 0.035  | LLTDLLSDTHLVPR           |
| 310 | gi 125843259 | PREDICTED: polymerase (RNA) III (DNA directed) polypeptide 1        | 41.8 | 1130 | 585.65  | 1169.29 | 1169.70 | 44.34 | 0.039  | VILIQEQLSK               |
| 311 | gi 131888959 | hypothetical protein LOC100034538 [Danio rerio]                     | 43.5 | 448  | 710.11  | 1418.20 | 1415.74 | 44.34 | 0.038  | EALGAENIQSTKR            |
| 312 | gi 189526852 | PREDICTED: similar to G2/M-phase specific E3 ubiquitin ligase 1     | 44.9 | 762  | 898.52  | 1795.02 | 1794.80 | 44.16 | 0.036  | SNMEFAINNTHGFGKE         |
| 313 | gi 189519924 | PREDICTED: similar to Uncharacterized protein KIAA0461              | 33.5 | 2775 | 664.74  | 1991.18 | 1992.00 | 44.09 | 0.033  | VGEDSMSGDPLSKLPVPHK      |
| 314 | gi 50344798  | ubiquitin-conjugating enzyme E2L 3 [Danio rerio]                    | 69.5 | 154  | 828.62  | 2482.83 | 2482.32 | 47.47 | 0.013  | TDQVIQSLIALVNDPQPEHPLR   |
| 315 | gi 189532554 | PREDICTED: similar to karyopherin alpha 6 (importin alpha 6)        | 37.4 | 537  | 609.19  | 1216.37 | 1216.62 | 44.01 | 0.046  | NKALNLEEMR               |
| 316 | gi 47086477  | ribosomal protein L13a [Danio rerio]                                | 46.8 | 205  | 634.75  | 1267.49 | 1265.65 | 43.73 | 0.043  | YQAITATLEEK              |
| 317 | gi 189517523 | PREDICTED: hypothetical protein [Danio rerio]                       | 58.5 | 147  | 713.74  | 1425.46 | 1424.76 | 43.62 | 0.042  | INVDEIGPQTLAR            |
| 318 | gi 121583897 | hypothetical protein LOC562692 [Danio rerio]                        | 39.8 | 384  | 816.81  | 1631.60 | 1631.81 | 43.59 | 0.045  | ELEEKVAMLEAENK           |
| 319 | gi 51010975  | hypothetical protein LOC445053 [Danio rerio]                        | 39.2 | 204  | 853.67  | 1705.32 | 1704.91 | 43.53 | 0.044  | GATYGKPVHHGVNQIK         |
| 320 | gi 41053395  | glutamate oxaloacetate transaminase 2 [Danio rerio]                 | 66.1 | 428  | 998.97  | 1995.92 | 1994.03 | 41.92 | 0.054  | YFIEQGHNILLSQSFAK        |
| 321 | gi 50539832  | lysyl-tRNA synthetase [Danio rerio]                                 | 37.2 | 602  | 750.82  | 2249.44 | 2247.14 | 43.46 | 0.036  | YNHLQPGDHLTDVVLNLSGR     |
| 322 | gi 52218992  | hypothetical protein LOC447834 [Danio rerio]                        | 52.8 | 248  | 662.36  | 1322.70 | 1321.71 | 43.45 | 0.044  | TLLGGGGVDGAIHR           |

|     |              |                                                                    |      |      |         |         |         |       |       |                         |
|-----|--------------|--------------------------------------------------------------------|------|------|---------|---------|---------|-------|-------|-------------------------|
| 323 | gi 189536881 | PREDICTED: hypothetical protein LOC402880 [Danio rerio]            | 26.6 | 173  | 684.43  | 1366.84 | 1367.74 | 43.41 | 0.044 | LDTPLPDVPFVR            |
| 324 | gi 189541652 | PREDICTED: similar to Myosin-3 (Myosin heavy chain 3)              | 52.7 | 882  | 659.27  | 1316.53 | 1315.65 | 43.35 | 0.049 | ELELELDAEQK             |
| 325 | gi 52219050  | hypothetical protein LOC447859 [Danio rerio]                       | 61.6 | 617  | 928.92  | 2783.72 | 2782.39 | 43.84 | 0.028 | ITDENLQSQTGLYIPEYEEALKI |
| 326 | gi 113682189 | glutaminase, like [Danio rerio]                                    | 44.5 | 591  | 652.45  | 1954.32 | 1951.90 | 42.93 | 0.044 | ASSRRALCTQTDAANDK       |
| 327 | gi 189531190 | PREDICTED: im:7145859 isoform 1 [Danio rerio]                      | 28.8 | 677  | 1052.47 | 2102.92 | 2102.03 | 42.90 | 0.044 | EVDEVDAALSDLEITLEGGK    |
| 328 | gi 57525959  | BCL2-associated athanogene 3 [Danio rerio]                         | 24.6 | 459  | 1015.59 | 3043.75 | 3041.54 | 42.71 | 0.031 | VSEVPQQIHHQPVQQQQPTQ    |
| 329 | gi 189529567 | PREDICTED: glutamate receptor, ionotropic, kainate 5 [Danio rerio] | 48.9 | 1052 | 808.26  | 1614.50 | 1612.91 | 42.69 | 0.052 | AECLLRLEELIRR           |
| 330 | gi 18858379  | carbonic anhydrase [Danio rerio]                                   | 55.8 | 260  | 745.25  | 1488.49 | 1489.64 | 39.21 | 0.12  | QFHFWGSSDDK             |
| 331 | gi 62955581  | hypothetical protein LOC550502 [Danio rerio]                       | 53.8 | 455  | 1113.39 | 2224.76 | 2224.07 | 42.61 | 0.045 | AHIVFDFHQAVDGVQEQER     |
| 332 | gi 136256027 | phosphorylase, glycogen; brain [Danio rerio]                       | 43.2 | 843  | 953.65  | 1905.28 | 1905.00 | 42.55 | 0.049 | LITSVGEVNVHDPVVGDR      |
| 333 | gi 41055708  | proteasome (prosome, macropain) 26S subunit, non-ATF               | 32.4 | 503  | 1294.90 | 2587.79 | 2586.35 | 42.35 | 0.04  | EFLGFLQVVEIEGDVPFRPR    |
| 334 | gi 52219194  | fatty acid binding protein 11 [Danio rerio]                        | 48.5 | 134  | 769.63  | 1537.24 | 1535.67 | 41.74 | 0.063 | LNEPFEETTADDR           |
| 335 | gi 131889079 | hypothetical protein LOC100034487 [Danio rerio]                    | 60.5 | 850  | 544.27  | 543.26  | 543.31  | 41.53 | 0.034 | INAAR                   |
| 336 | gi 39752649  | kelch repeat and BTB (POZ) domain containing 10 [Danio rerio]      | 35   | 605  | 544.27  | 543.26  | 543.31  | 41.53 | 0.034 | LNAAR                   |
| 337 | gi 28201964  | erythrocyte membrane protein band 4.1 (elliptocytosis 1,)          | 25.8 | 1534 | 583.60  | 1165.19 | 1164.71 | 41.44 | 0.071 | IELVLPEKPK              |
| 338 | gi 189536521 | PREDICTED: similar to phosphofructokinase, platelet [Danio rerio]  | 49.6 | 789  | 1115.74 | 2229.46 | 2229.10 | 41.20 | 0.062 | TSYDVSDSGQLEHVVVNRPK    |

### TCDD replicate 3

| Protein # | Accession ID | Protein name                                      | Protein coverage | length   | peptide m/z  | peptide M <sub>rxpt</sub> | peptide M <sub>r<sub>calc</sub></sub> | peptide score | pep_expect | peptide sequence        |
|-----------|--------------|---------------------------------------------------|------------------|----------|--------------|---------------------------|---------------------------------------|---------------|------------|-------------------------|
| 1         | gi 41053652  | myoglobin [Danio rerio]                           | 88.4             | 147      | 550.28       | 1098.55                   | 1098.58                               | 95.61         | 1.60E-07   | AGLDAAGQGALR            |
|           |              |                                                   |                  |          | 780.21       | 1558.40                   | 1557.74                               | 111.12        | 3.40E-09   | VMDAVIGDIDGYK           |
|           |              |                                                   |                  |          | 1010.42      | 2018.82                   | 2020.10                               | 106.78        | 7.00E-09   | GDHAALLKPLANTHANIHK     |
|           |              |                                                   |                  |          | 1110.00      | 2217.98                   | 2219.23                               | 105.42        | 8.80E-09   | AKGDHAALLKPLANTHANIHK   |
|           |              |                                                   |                  |          | 1127.60      | 2253.19                   | 2253.18                               | 118.45        | 4.30E-10   | FSGISQDLAGSPAVAAHGATV   |
|           |              |                                                   |                  |          | 1191.71      | 2381.41                   | 2381.27                               | 87.39         | 4.80E-07   | FSGISQDLAGSPAVAAHGATV   |
|           |              |                                                   |                  |          | 946.49       | 2836.43                   | 2834.54                               | 64.80         | 7.10E-05   | GDHAALLKPLANTHANIHKVALN |
| 2         | gi 74315904  | alpha globin-like [Danio rerio]                   | 60.1             | 143      | 559.18       | 1116.34                   | 1114.56                               | 48.72         | 0.0082     | ADEIGAEALAR             |
|           |              |                                                   |                  |          | 589.10       | 1176.18                   | 1175.62                               | 80.21         | 5.50E-06   | TIMGAVGEAISK            |
|           |              |                                                   |                  |          | 684.61       | 1367.21                   | 1365.73                               | 77.39         | 8.40E-06   | FFNNLALALSEK            |
|           |              |                                                   |                  |          | 933.31       | 1864.61                   | 1863.88                               | 111.04        | 2.90E-09   | TYFSHWSDLSPGSGPVK       |
|           |              |                                                   |                  |          | 934.31       | 1866.60                   | 1868.00                               | 124.17        | 1.40E-10   | IDDLVGGLAALSELHAFK      |
|           |              |                                                   |                  |          | 997.30       | 1992.58                   | 1991.97                               | 54.63         | 0.0012     | TYFSHWSDLSPGSGPVKK      |
|           |              |                                                   |                  |          | 1008.94      | 3023.79                   | 3025.62                               | 41.79         | 0.013      | TIMGAVGEAISKIDDLVGGLAAL |
| 3         | gi 47271417  | hemoglobin alpha adult-1 [Danio rerio]            | 68.5             | 143      | 559.18       | 1116.34                   | 1114.56                               | 48.72         | 0.0082     | ADEIGAEALAR             |
|           |              |                                                   |                  |          | 582.09       | 1162.17                   | 1161.61                               | 80.71         | 4.70E-06   | TIMGAVGEAVSK            |
|           |              |                                                   |                  |          | 684.61       | 1367.21                   | 1365.73                               | 77.39         | 8.40E-06   | FFNNLALALSEK            |
|           |              |                                                   |                  |          | 924.26       | 1846.50                   | 1847.88                               | 123.11        | 1.70E-10   | TYFSHWADLSPGSGPVK       |
|           |              |                                                   |                  |          | 934.31       | 1866.60                   | 1868.00                               | 124.17        | 1.40E-10   | IDDLVGGLAALSELHAFK      |
| 4         | gi 163644263 | ventricular myosin heavy chain-like [Danio rerio] | 57.6             | 1936     | 496.07       | 990.13                    | 989.50                                | 55.65         | 0.0018     | SNNFQKPR                |
|           |              |                                                   |                  |          | 609.16       | 1216.30                   | 1215.63                               | 44.72         | 0.019      | AGLLGQLEEMR             |
|           |              |                                                   |                  |          | 1224.67      | 1223.66                   | 1223.61                               | 43.14         | 0.023      | TKYETDAIQR              |
|           |              |                                                   |                  |          | 620.08       | 1238.15                   | 1237.63                               | 47.53         | 0.0085     | EADVLQQNPPK             |
|           |              |                                                   |                  |          | 641.99       | 1281.96                   | 1281.54                               | 41.73         | 0.032      | EQYEEEQEAK              |
|           |              |                                                   |                  |          | 643.04       | 1284.06                   | 1282.57                               | 37.91         | 0.078      | ELTYQTEEDR              |
|           |              |                                                   |                  |          | 645.12       | 1288.22                   | 1288.63                               | 47.26         | 0.0099     | DSQLQLDDSLR             |
|           |              |                                                   |                  |          | 654.30       | 1306.58                   | 1305.58                               | 40.69         | 0.044      | ELECEVEAEQK             |
|           |              |                                                   |                  |          | 655.60       | 1309.19                   | 1307.64                               | 67.02         | 9.30E-05   | NSFSQQLEDLK             |
|           |              |                                                   |                  |          | 1368.62      | 1367.61                   | 1367.63                               | 55.83         | 0.0012     | LQHELDEAEER             |
| 699.73    | 1397.44      | 1397.75                                           | 84.68            | 1.50E-06 | NALLQAELEELR |                           |                                       |               |            |                         |
| 706.52    | 1411.03      | 1410.66                                           | 59.01            | 0.00056  | ELTYQTEEDRK  |                           |                                       |               |            |                         |

|   |              |                                                       |      |         |         |         |         |          |                   |                          |
|---|--------------|-------------------------------------------------------|------|---------|---------|---------|---------|----------|-------------------|--------------------------|
|   |              |                                                       |      | 708.66  | 1415.30 | 1414.73 | 99.30   | 5.60E-08 | LAEQELLDVTER      |                          |
|   |              |                                                       |      | 732.18  | 1462.35 | 1463.74 | 67.18   | 8.90E-05 | NSFSQQLEDLKR      |                          |
|   |              |                                                       |      | 733.09  | 1464.16 | 1463.68 | 57.89   | 0.00074  | LSEKDEEMEQVK      |                          |
|   |              |                                                       |      | 733.14  | 1464.26 | 1463.74 | 77.88   | 7.40E-06 | NSFSQQLEDLKR      |                          |
|   |              |                                                       |      | 733.64  | 1465.26 | 1463.68 | 65.89   | 0.00012  | LSEKDEEMEQVK      |                          |
|   |              |                                                       |      | 738.45  | 1474.89 | 1473.68 | 79.64   | 5.10E-06 | VEELEEELEAER      |                          |
|   |              |                                                       |      | 748.98  | 1495.95 | 1495.73 | 61.03   | 0.00034  | KLQHELDEAEER      |                          |
|   |              |                                                       |      | 751.13  | 1500.24 | 1499.75 | 107.00  | 8.80E-09 | LQEAEVEAVNAK      |                          |
|   |              |                                                       |      | 752.60  | 1503.19 | 1502.76 | 72.06   | 3.00E-05 | ENQSILITGESGAGK   |                          |
|   |              |                                                       |      | 761.34  | 1520.66 | 1520.76 | 65.72   | 0.00012  | AITDAAMMAEELKK    |                          |
|   |              |                                                       |      | 771.09  | 1540.17 | 1539.77 | 71.72   | 2.90E-05 | DYHIFYQILSNK      |                          |
|   |              |                                                       |      | 771.81  | 1541.61 | 1541.83 | 41.93   | 0.028    | IDDEQSIIIQLQK     |                          |
|   |              |                                                       |      | 771.90  | 1541.78 | 1542.83 | 96.87   | 8.70E-08 | KLAEQELLDVTER     |                          |
|   |              |                                                       |      | 772.41  | 1542.81 | 1541.83 | 31.84   | 0.29     | IDDEQSIIIQLQK     |                          |
|   |              |                                                       |      | 772.48  | 1542.94 | 1542.83 | 83.14   | 2.10E-06 | KLAEQELLDVTER     |                          |
|   |              |                                                       |      | 772.58  | 1543.15 | 1541.83 | 79.18   | 5.30E-06 | IDDEQSIIIQLQK     |                          |
|   |              |                                                       |      | 773.18  | 1544.35 | 1542.83 | 89.45   | 5.10E-07 | KLAEQELLDVTER     |                          |
|   |              |                                                       |      | 779.46  | 1556.90 | 1556.79 | 66.68   | 9.80E-05 | LLGSLDIDHQQYR     |                          |
|   |              |                                                       |      | 802.68  | 1603.34 | 1602.78 | 88.85   | 5.80E-07 | SNDDLKENTAIVER    |                          |
|   |              |                                                       |      | 806.78  | 1611.54 | 1610.75 | 87.12   | 8.00E-07 | AAEESSEEQANVHLGK  |                          |
|   |              |                                                       |      | 810.75  | 1619.49 | 1620.72 | 57.80   | 0.00071  | LEDEEEMNAELTAK    |                          |
|   |              |                                                       |      | 816.81  | 1631.60 | 1631.78 | 96.03   | 1.10E-07 | LEEAGGATAAQIEMNK  |                          |
|   |              |                                                       |      | 824.65  | 1647.28 | 1645.82 | 84.14   | 1.80E-06 | NLTEEMAALDDIIAK   |                          |
|   |              |                                                       |      | 843.71  | 1685.41 | 1684.83 | 61.27   | 0.00031  | LELDDVASSMEHIVK   |                          |
|   |              |                                                       |      | 845.69  | 1689.37 | 1688.88 | 93.45   | 1.90E-07 | GQNVQQVNYAIGALSK  |                          |
|   |              |                                                       |      | 1712.88 | 1711.87 | 1711.91 | 36.88   | 0.079    | ILNPAAIPEGQFIDSK  |                          |
|   |              |                                                       |      | 859.79  | 1717.56 | 1717.85 | 96.85   | 8.30E-08 | NEDPLNETVVGLYQK   |                          |
|   |              |                                                       |      | 862.23  | 1722.44 | 1721.94 | 96.71   | 9.10E-08 | VQLLHSQNTSLINQK   |                          |
|   |              |                                                       |      | 880.79  | 1759.56 | 1759.88 | 84.54   | 1.40E-06 | LEEAGGATAAQIEMNKK |                          |
|   |              |                                                       |      | 894.72  | 1787.43 | 1786.87 | 93.16   | 1.90E-07 | TIDTLQSALESETHSR  |                          |
|   |              |                                                       |      | 896.63  | 1791.24 | 1790.76 | 101.34  | 3.10E-08 | QREEQAEADGTEDADK  |                          |
|   |              |                                                       |      | 930.48  | 1858.95 | 1858.88 | 100.27  | 3.50E-08 | LEQQVDDLEGSLEQEK  |                          |
|   |              |                                                       |      | 935.63  | 1869.25 | 1867.93 | 118.69  | 5.00E-10 | DLEEATLQHEATAATLR |                          |
|   |              |                                                       |      | 943.56  | 1885.10 | 1884.92 | 73.56   | 1.60E-05 | QADSVLGEQIDNLQR   |                          |
| 5 | gj 169403947 | glyceraldehyde-3-phosphate dehydrogenase [Danio rerio | 79   | 333     | 748.28  | 1494.55 | 1494.84 | 92.12    | 2.60E-07          | VPTPNVSVVDLTVR           |
|   |              |                                                       |      |         | 787.22  | 1572.42 | 1571.83 | 87.49    | 7.80E-07          | LVIDGHAIIVYSER           |
|   |              |                                                       |      |         | 882.65  | 1763.28 | 1762.80 | 54.62    | 0.0014            | LVTWYDNEFGYSNR           |
|   |              |                                                       |      |         | 931.70  | 1861.39 | 1860.94 | 91.36    | 2.70E-07          | SSIFDAGAGIALNDHFVK       |
|   |              |                                                       |      |         | 1105.92 | 2209.83 | 2210.17 | 74.16    | 1.20E-05          | LVIDGHAIIVYSERDPANIK     |
|   |              |                                                       |      |         | 1108.00 | 2213.98 | 2212.10 | 70.66    | 2.60E-05          | VIISAPSADAPMFVMGVNHEK    |
|   |              |                                                       |      |         | 1116.28 | 2230.55 | 2230.08 | 112.38   | 1.70E-09          | WGDAGATYVVESTGVFTTIEK    |
|   |              |                                                       |      |         | 1300.97 | 2599.93 | 2599.37 | 115.89   | 6.60E-10          | VINDNFVIVEGLMSTVHAITATQK |
| 6 | gj 189536977 | PREDICTED: similar to slow myosin heavy chain 3 [Dani | 46.2 | 1938    | 496.07  | 990.13  | 989.50  | 55.65    | 0.0018            | SNNFQKPR                 |
|   |              |                                                       |      |         | 1224.67 | 1223.66 | 1223.61 | 43.14    | 0.023             | TKYETDAIQR               |
|   |              |                                                       |      |         | 641.99  | 1281.96 | 1281.54 | 41.73    | 0.032             | EQYEEEQEAK               |
|   |              |                                                       |      |         | 643.04  | 1284.06 | 1282.57 | 37.91    | 0.078             | ELTYQTEEDR               |
|   |              |                                                       |      |         | 1368.62 | 1367.61 | 1367.63 | 55.83    | 0.0012            | LQHELDEAEER              |
|   |              |                                                       |      |         | 706.52  | 1411.03 | 1410.66 | 59.01    | 0.00056           | ELTYQTEEDRK              |
|   |              |                                                       |      |         | 748.98  | 1495.95 | 1495.73 | 61.03    | 0.00034           | KLQHELDEAEER             |
|   |              |                                                       |      |         | 752.60  | 1503.19 | 1502.76 | 72.06    | 3.00E-05          | ENQSILITGESGAGK          |
|   |              |                                                       |      |         | 761.34  | 1520.66 | 1520.76 | 65.72    | 0.00012           | AITDAAMMAEELKK           |
|   |              |                                                       |      |         | 810.75  | 1619.49 | 1620.72 | 57.80    | 0.00071           | LEDEEEMNAELTAK           |

|    |              |                                                         |      |         |         |         |         |          |                       |                         |
|----|--------------|---------------------------------------------------------|------|---------|---------|---------|---------|----------|-----------------------|-------------------------|
|    |              |                                                         |      | 816.81  | 1631.60 | 1631.78 | 96.03   | 1.10E-07 | LEEAGGATAAQIEMNK      |                         |
|    |              |                                                         |      | 858.95  | 1715.88 | 1716.90 | 88.94   | 5.30E-07 | NKDPLNETVVGLYQK       |                         |
|    |              |                                                         |      | 862.23  | 1722.44 | 1721.94 | 96.71   | 9.10E-08 | VQLLHSQNTSLLNQK       |                         |
|    |              |                                                         |      | 880.79  | 1759.56 | 1759.88 | 84.54   | 1.40E-06 | LEEAGGATAAQIEMNKK     |                         |
|    |              |                                                         |      | 896.63  | 1791.24 | 1790.76 | 101.34  | 3.10E-08 | QREEQAEADGTEDADK      |                         |
|    |              |                                                         |      | 930.48  | 1858.95 | 1858.88 | 100.27  | 3.50E-08 | LEQQVDDLEGSLEQEK      |                         |
|    |              |                                                         |      | 948.33  | 1894.65 | 1895.90 | 70.16   | 3.40E-05 | HADSVSDLGEQIDNLQR     |                         |
|    |              |                                                         |      | 993.73  | 1985.45 | 1986.97 | 82.42   | 2.00E-06 | LEQQVDDLEGSLEQEKK     |                         |
|    |              |                                                         |      | 1070.77 | 2139.52 | 2139.00 | 135.28  | 9.50E-12 | AEIQAALAEAEGSLEHEEGK  |                         |
|    |              |                                                         |      | 1099.79 | 2197.57 | 2197.01 | 97.21   | 6.10E-08 | ALQEAHQQTLDLQSEEDK    |                         |
|    |              |                                                         |      | 1427.49 | 2852.97 | 2853.40 | 96.93   | 4.10E-08 | ALQEAHQQTLDLQSEEDKVNT |                         |
| 7  | gj 70778800  | actin, alpha, cardiac muscle [Danio rerio]              | 71.6 | 377     | 600.05  | 1198.08 | 1197.51 | 75.20    | 1.60E-05              | DSYVGDEAQS              |
|    |              |                                                         |      |         | 896.17  | 1790.32 | 1789.88 | 102.64   | 2.10E-08              | SYELPDGQVITIGNER        |
|    |              |                                                         |      |         | 978.36  | 1954.70 | 1955.04 | 95.38    | 1.00E-07              | VAPEEHPTLLTEAPLNPK      |
|    |              |                                                         |      |         | 1114.80 | 2227.58 | 2227.06 | 62.75    | 0.00016               | DLYANNVLSGGTTMYPGIADR   |
|    |              |                                                         |      |         | 1178.43 | 2354.85 | 2355.15 | 135.42   | 8.00E-12              | KDLYANNVLSGGTTMYPGIADR  |
|    |              |                                                         |      |         | 1178.43 | 2354.85 | 2355.15 | 135.42   | 8.00E-12              | KDLYANNVLSGGTTMYPGIADR  |
| 8  | gj 62955473  | hypothetical protein LOC550445 [Danio rerio]            | 69.2 | 377     | 600.05  | 1198.08 | 1197.51 | 75.20    | 1.60E-05              | DSYVGDEAQS              |
|    |              |                                                         |      |         | 896.17  | 1790.32 | 1789.88 | 102.64   | 2.10E-08              | SYELPDGQVITIGNER        |
|    |              |                                                         |      |         | 978.36  | 1954.70 | 1955.04 | 95.38    | 1.00E-07              | VAPEEHPTLLTEAPLNPK      |
|    |              |                                                         |      |         | 1114.80 | 2227.58 | 2227.06 | 62.75    | 0.00016               | DLYANNVLSGGTTMYPGIADR   |
|    |              |                                                         |      |         | 1178.43 | 2354.85 | 2355.15 | 135.42   | 8.00E-12              | KDLYANNVLSGGTTMYPGIADR  |
| 9  | gj 66472252  | slow myosin heavy chain 1 [Danio rerio]                 | 43.1 | 1938    | 1224.67 | 1223.66 | 1223.61 | 43.14    | 0.023                 | TKYETDAIQR              |
|    |              |                                                         |      |         | 643.04  | 1284.06 | 1282.57 | 37.91    | 0.078                 | ELTYQTEEDR              |
|    |              |                                                         |      |         | 1368.62 | 1367.61 | 1367.63 | 55.83    | 0.0012                | LQHELDEAEER             |
|    |              |                                                         |      |         | 706.52  | 1411.03 | 1410.66 | 59.01    | 0.00056               | ELTYQTEEDRK             |
|    |              |                                                         |      |         | 1489.81 | 1488.80 | 1488.74 | 50.47    | 0.0042                | ENQSVLITGESGAGK         |
|    |              |                                                         |      |         | 748.98  | 1495.95 | 1495.73 | 61.03    | 0.00034               | KLQHELDEAEER            |
|    |              |                                                         |      |         | 751.13  | 1500.24 | 1499.75 | 107.00   | 8.80E-09              | LQEAEAVEAVNAK           |
|    |              |                                                         |      |         | 761.34  | 1520.66 | 1520.76 | 65.72    | 0.00012               | AITDAAMMAEELKK          |
|    |              |                                                         |      |         | 783.19  | 1564.37 | 1562.78 | 31.72    | 0.29                  | VVDTLQSSLESETR          |
|    |              |                                                         |      |         | 816.81  | 1631.60 | 1631.78 | 96.03    | 1.10E-07              | LEEAGGATAAQIEMNK        |
|    |              |                                                         |      |         | 880.79  | 1759.56 | 1759.88 | 84.54    | 1.40E-06              | LEEAGGATAAQIEMNKK       |
|    |              |                                                         |      |         | 896.63  | 1791.24 | 1790.76 | 101.34   | 3.10E-08              | QREEQAEADGTEDADK        |
|    |              |                                                         |      |         | 930.48  | 1858.95 | 1858.88 | 100.27   | 3.50E-08              | LEQQVDDLEGSLEQEK        |
|    |              |                                                         |      |         | 935.63  | 1869.25 | 1867.93 | 118.69   | 5.00E-10              | DLEEATLQHEATAATLR       |
|    |              |                                                         |      |         | 993.73  | 1985.45 | 1986.97 | 82.42    | 2.00E-06              | LEQQVDDLEGSLEQEKK       |
|    |              |                                                         |      |         | 1003.16 | 2004.30 | 2002.97 | 56.10    | 0.00081               | NLQEEISDLTEQLGETGK      |
|    |              |                                                         |      |         | 1099.79 | 2197.57 | 2197.01 | 97.21    | 6.10E-08              | ALQEAHQQTLDLQSEEDK      |
|    |              |                                                         |      |         | 1101.39 | 2200.76 | 2199.12 | 103.60   | 1.40E-08              | GTLEDQIIQANPALEAFGNAK   |
|    |              |                                                         |      |         | 1165.44 | 2328.86 | 2327.21 | 37.90    | 0.047                 | KGTLLEDQIIQANPALEAFGNAK |
|    |              |                                                         |      |         | 1427.49 | 2852.97 | 2853.40 | 96.93    | 4.10E-08              | ALQEAHQQTLDLQSEEDKVNT   |
| 10 | gj 18858329  | ba1 globin [Danio rerio]                                | 71.6 | 148     | 480.00  | 957.99  | 957.56  | 46.94    | 0.013                 | TAILGLWGK               |
|    |              |                                                         |      |         | 713.66  | 1425.30 | 1424.76 | 77.10    | 8.90E-06              | LNIDEIGPQALSR           |
|    |              |                                                         |      |         | 725.37  | 1448.72 | 1449.69 | 86.81    | 9.90E-07              | NTYAALSVMHSEK           |
|    |              |                                                         |      |         | 898.52  | 1795.02 | 1794.83 | 130.34   | 3.50E-11              | FGQAGFNADVQEAQWQK       |
|    |              |                                                         |      |         | 993.79  | 1985.57 | 1984.97 | 94.94    | 1.10E-07              | YFATFGNLSSPAAIMGNPK     |
| 11 | gj 116325975 | ATP synthase, H+ transporting, mitochondrial F1 comple: | 52.3 | 551     | 645.10  | 1288.19 | 1286.69 | 73.63    | 2.30E-05              | HALIYDDLK               |
|    |              |                                                         |      |         | 651.12  | 1300.22 | 1299.74 | 86.95    | 1.00E-06              | TAIAIDTIINQK            |
|    |              |                                                         |      |         | 682.71  | 1363.40 | 1362.69 | 82.87    | 2.50E-06              | TGTAEVSSILEEK           |
|    |              |                                                         |      |         | 720.11  | 1438.21 | 1437.84 | 47.15    | 0.0085                | GIRPAINVGLSVSR          |
|    |              |                                                         |      |         | 766.34  | 1530.67 | 1530.75 | 131.50   | 3.30E-11              | ILGADTGAELEETGR         |

|         |              |                                                         |        |          |                       |         |         |        |          |                      |
|---------|--------------|---------------------------------------------------------|--------|----------|-----------------------|---------|---------|--------|----------|----------------------|
| 12      | gj 189536981 | PREDICTED: similar to slow myosin heavy chain 3 isoform | 45.4   | 1940     | 1031.14               | 2060.27 | 2059.13 | 83.36  | 1.50E-06 | AFLQHVISQHQDLLAAIR   |
|         |              |                                                         |        |          | 1182.76               | 2363.50 | 2364.17 | 82.77  | 1.50E-06 | EVAFAQFGSDLDAATQQLNR |
|         |              |                                                         |        |          | 496.07                | 990.13  | 989.50  | 55.65  | 0.0018   | SNNFQKPR             |
|         |              |                                                         |        |          | 1224.67               | 1223.66 | 1223.61 | 43.14  | 0.023    | TKYETDAIQR           |
|         |              |                                                         |        |          | 641.99                | 1281.96 | 1281.54 | 41.73  | 0.032    | EQYEEEQEAK           |
|         |              |                                                         |        |          | 643.04                | 1284.06 | 1282.57 | 37.91  | 0.078    | ELTYQTEEDR           |
|         |              |                                                         |        |          | 1368.62               | 1367.61 | 1367.63 | 55.83  | 0.0012   | LQHELDEAEER          |
|         |              |                                                         |        |          | 706.52                | 1411.03 | 1410.66 | 59.01  | 0.00056  | ELTYQTEEDRK          |
|         |              |                                                         |        |          | 748.98                | 1495.95 | 1495.73 | 61.03  | 0.00034  | KLQHELDEAEER         |
|         |              |                                                         |        |          | 752.60                | 1503.19 | 1502.76 | 72.06  | 3.00E-05 | ENQSILITGESGAGK      |
|         |              |                                                         |        |          | 761.34                | 1520.66 | 1520.76 | 65.72  | 0.00012  | AITDAAMMAEELKK       |
|         |              |                                                         |        |          | 810.75                | 1619.49 | 1620.72 | 57.80  | 0.00071  | LEDEEEMNAELTAK       |
|         |              |                                                         |        |          | 816.81                | 1631.60 | 1631.78 | 96.03  | 1.10E-07 | LEEAGGATAAQIEMNK     |
|         |              |                                                         |        |          | 858.95                | 1715.88 | 1716.90 | 88.94  | 5.30E-07 | NKDPLNETVVGLYQK      |
|         |              |                                                         |        |          | 862.23                | 1722.44 | 1721.94 | 96.71  | 9.10E-08 | VQLLHSQNTSLLNQK      |
|         |              |                                                         |        |          | 880.79                | 1759.56 | 1759.88 | 84.54  | 1.40E-06 | LEEAGGATAAQIEMNKK    |
|         |              |                                                         |        |          | 896.63                | 1791.24 | 1790.76 | 101.34 | 3.10E-08 | QREEQAEADGTEDADK     |
| 930.48  | 1858.95      | 1858.88                                                 | 100.27 | 3.50E-08 | LEQQVDDLEGSLEQEK      |         |         |        |          |                      |
| 948.33  | 1894.65      | 1895.90                                                 | 70.16  | 3.40E-05 | HADSVSDLGEQIDNLQR     |         |         |        |          |                      |
| 993.73  | 1985.45      | 1986.97                                                 | 82.42  | 2.00E-06 | LEQQVDDLEGSLEQEKK     |         |         |        |          |                      |
| 1099.79 | 2197.57      | 2197.01                                                 | 97.21  | 6.10E-08 | ALQEAHQQTLDLQSEEDK    |         |         |        |          |                      |
| 1427.49 | 2852.97      | 2853.40                                                 | 96.93  | 4.10E-08 | ALQEAHQQTLDLQSEEDKVNT |         |         |        |          |                      |
| 13      | gj 189536979 | PREDICTED: similar to slow myosin heavy chain 3 isoform | 45.3   | 1934     | 496.07                | 990.13  | 989.50  | 55.65  | 0.0018   | SNNFQKPR             |
|         |              |                                                         |        |          | 1224.67               | 1223.66 | 1223.61 | 43.14  | 0.023    | TKYETDAIQR           |
|         |              |                                                         |        |          | 641.99                | 1281.96 | 1281.54 | 41.73  | 0.032    | EQYEEEQEAK           |
|         |              |                                                         |        |          | 643.04                | 1284.06 | 1282.57 | 37.91  | 0.078    | ELTYQTEEDR           |
|         |              |                                                         |        |          | 1368.62               | 1367.61 | 1367.63 | 55.83  | 0.0012   | LQHELDEAEER          |
|         |              |                                                         |        |          | 706.52                | 1411.03 | 1410.66 | 59.01  | 0.00056  | ELTYQTEEDRK          |
|         |              |                                                         |        |          | 748.98                | 1495.95 | 1495.73 | 61.03  | 0.00034  | KLQHELDEAEER         |
|         |              |                                                         |        |          | 752.60                | 1503.19 | 1502.76 | 72.06  | 3.00E-05 | ENQSILITGESGAGK      |
|         |              |                                                         |        |          | 761.34                | 1520.66 | 1520.76 | 65.72  | 0.00012  | AITDAAMMAEELKK       |
|         |              |                                                         |        |          | 810.75                | 1619.49 | 1620.72 | 57.80  | 0.00071  | LEDEEEMNAELTAK       |
|         |              |                                                         |        |          | 816.81                | 1631.60 | 1631.78 | 96.03  | 1.10E-07 | LEEAGGATAAQIEMNK     |
|         |              |                                                         |        |          | 858.95                | 1715.88 | 1716.90 | 88.94  | 5.30E-07 | NKDPLNETVVGLYQK      |
|         |              |                                                         |        |          | 862.23                | 1722.44 | 1721.94 | 96.71  | 9.10E-08 | VQLLHSQNTSLLNQK      |
|         |              |                                                         |        |          | 880.79                | 1759.56 | 1759.88 | 84.54  | 1.40E-06 | LEEAGGATAAQIEMNKK    |
|         |              |                                                         |        |          | 896.63                | 1791.24 | 1790.76 | 101.34 | 3.10E-08 | QREEQAEADGTEDADK     |
|         |              |                                                         |        |          | 930.48                | 1858.95 | 1858.88 | 100.27 | 3.50E-08 | LEQQVDDLEGSLEQEK     |
|         |              |                                                         |        |          | 948.33                | 1894.65 | 1895.90 | 70.16  | 3.40E-05 | HADSVSDLGEQIDNLQR    |
| 993.73  | 1985.45      | 1986.97                                                 | 82.42  | 2.00E-06 | LEQQVDDLEGSLEQEKK     |         |         |        |          |                      |
| 1099.79 | 2197.57      | 2197.01                                                 | 97.21  | 6.10E-08 | ALQEAHQQTLDLQSEEDK    |         |         |        |          |                      |
| 1427.49 | 2852.97      | 2853.40                                                 | 96.93  | 4.10E-08 | ALQEAHQQTLDLQSEEDKVNT |         |         |        |          |                      |
| 14      | gj 189525553 | PREDICTED: hypothetical protein LOC336197 [Danio rerio] | 85.9   | 517      | 488.47                | 974.92  | 974.55  | 46.55  | 0.015    | IGLFGGAGVVK          |
|         |              |                                                         |        |          | 1435.70               | 1434.69 | 1434.75 | 48.04  | 0.0074   | FTQAGSEVSALLGR       |
|         |              |                                                         |        |          | 720.70                | 1439.39 | 1438.78 | 77.81  | 7.50E-06 | VALTGLTVAEYFR        |
|         |              |                                                         |        |          | 729.72                | 1457.43 | 1456.83 | 62.88  | 0.00023  | TVLIMELINNVAK        |
|         |              |                                                         |        |          | 838.90                | 1675.79 | 1676.92 | 111.15 | 3.30E-09 | LVLEVAQHLGENTVR      |
|         |              |                                                         |        |          | 916.22                | 1830.42 | 1828.88 | 72.59  | 2.10E-05 | IMDPNIVGTEHYDVAR     |
|         |              |                                                         |        |          | 961.34                | 1920.66 | 1920.96 | 43.02  | 0.018    | DQEGQDVLLFIDNIFR     |
|         |              |                                                         |        |          | 994.82                | 1987.63 | 1987.03 | 98.94  | 4.30E-08 | AIAELGIYPAVDPLDSTSR  |
|         |              |                                                         |        |          | 1003.03               | 2004.05 | 2004.05 | 112.09 | 2.00E-09 | FLSQPFQVAEVFTGHLGK   |
|         |              |                                                         |        |          | 687.59                | 2059.73 | 2059.99 | 41.30  | 0.024    | EGNDLYHEMIESGVINLK   |

|    |              |                                                         |      |         |         |         |         |          |                          |                          |
|----|--------------|---------------------------------------------------------|------|---------|---------|---------|---------|----------|--------------------------|--------------------------|
|    |              |                                                         |      | 1060.02 | 2118.03 | 2118.04 | 38.73   | 0.042    | SLQDIIAILGMDELSEEDK      |                          |
|    |              |                                                         |      | 1331.03 | 2660.05 | 2658.38 | 97.51   | 4.40E-08 | SLQDIIAILGMDELSEEDKLTVAR |                          |
|    |              |                                                         |      | 1282.28 | 3843.82 | 3841.97 | 47.77   | 0.002    | KGSITSVQAIYVPADDLTDPPAPA |                          |
| 15 | gi 23097290  | troponin T2, cardiac [Danio rerio]                      | 34.8 | 282     | 718.46  | 717.45  | 717.35  | 31.99    | 0.54                     | ELEAEK                   |
|    |              |                                                         |      |         | 509.03  | 1016.05 | 1015.47 | 58.74    | 0.00085                  | VDFDDIHR                 |
|    |              |                                                         |      |         | 609.45  | 1216.89 | 1216.66 | 49.43    | 0.0062                   | KEEEEIISLK               |
|    |              |                                                         |      |         | 855.86  | 1709.71 | 1710.90 | 55.88    | 0.001                    | RKPLDIDNANESALR          |
|    |              |                                                         |      |         | 957.35  | 1912.69 | 1913.95 | 95.06    | 1.10E-07                 | DLNELQTLIEAHFESR         |
| 16 | gi 66773080  | ATP synthase, H+ transporting, mitochondrial F1 comple: | 81.2 | 517     | 488.47  | 974.92  | 974.55  | 46.55    | 0.015                    | IGLFGGAGVGK              |
|    |              |                                                         |      |         | 1435.70 | 1434.69 | 1434.75 | 48.04    | 0.0074                   | FTQAGSEVSALLGR           |
|    |              |                                                         |      |         | 720.70  | 1439.39 | 1438.78 | 77.81    | 7.50E-06                 | VALTGLTVAEYFR            |
|    |              |                                                         |      |         | 729.72  | 1457.43 | 1456.83 | 62.88    | 0.00023                  | TVLIMELINNVAK            |
|    |              |                                                         |      |         | 838.90  | 1675.79 | 1676.92 | 111.15   | 3.30E-09                 | LVLEVAQHLGENTVR          |
|    |              |                                                         |      |         | 916.22  | 1830.42 | 1828.88 | 72.59    | 2.10E-05                 | IMDPNIVGTEHYDVAR         |
|    |              |                                                         |      |         | 961.34  | 1920.66 | 1920.96 | 43.02    | 0.018                    | DQEGQDVLLFIDNIFR         |
|    |              |                                                         |      |         | 994.82  | 1987.63 | 1987.03 | 98.94    | 4.30E-08                 | AIAELGIYPAVDPLDSTSR      |
|    |              |                                                         |      |         | 1003.03 | 2004.05 | 2004.05 | 112.09   | 2.00E-09                 | FLSQPFQVAEVFTGHLGK       |
|    |              |                                                         |      |         | 687.59  | 2059.73 | 2059.99 | 41.30    | 0.024                    | EGNDLYHEMIESGVINLK       |
|    |              |                                                         |      |         | 1282.28 | 3843.82 | 3841.97 | 47.77    | 0.002                    | KGSITSVQAIYVPADDLTDPPAPA |
| 17 | gi 55926111  | cardiac myosin light chain-1 [Danio rerio]              | 62.8 | 196     | 968.51  | 967.50  | 966.55  | 60.55    | 0.00047                  | HVLATLGEK                |
|    |              |                                                         |      |         | 757.17  | 1512.33 | 1511.69 | 84.44    | 1.60E-06                 | DQGTFFEDFVEGLR           |
|    |              |                                                         |      |         | 780.26  | 1558.50 | 1559.82 | 92.64    | 2.40E-07                 | KEEAPAPAPVPETPK          |
|    |              |                                                         |      |         | 856.49  | 1710.96 | 1710.82 | 92.16    | 2.40E-07                 | AKDQGTFFEDFVEGLR         |
|    |              |                                                         |      |         | 889.30  | 1776.58 | 1777.85 | 48.44    | 0.0061                   | SVPLDFSPDQIEEFR          |
|    |              |                                                         |      |         | 973.03  | 1944.05 | 1944.08 | 97.32    | 6.10E-08                 | ALGHNPTNADVLTVLGKPK      |
| 18 | gi 18858539  | desmin [Danio rerio]                                    | 52.2 | 473     | 527.61  | 1053.20 | 1052.56 | 39.51    | 0.06                     | KIHEEEIR                 |
|    |              |                                                         |      |         | 545.18  | 1088.34 | 1086.57 | 41.12    | 0.048                    | VSDLNQAVNK               |
|    |              |                                                         |      |         | 888.41  | 1774.80 | 1775.91 | 99.92    | 4.00E-08                 | FLEQQNSALTVEIER          |
|    |              |                                                         |      |         | 989.77  | 1977.53 | 1978.97 | 108.45   | 4.80E-09                 | LDFNLADAINQDFLNTR        |
|    |              |                                                         |      |         | 1094.31 | 2186.61 | 2186.00 | 145.27   | 9.40E-13                 | TFGSGLGSSIFAGHGSSGSSGS   |
| 19 | gi 83025080  | actinin, alpha 2 [Danio rerio]                          | 44.7 | 895     | 670.69  | 1339.36 | 1338.79 | 39.36    | 0.054                    | QAILGIQQEVLK             |
|    |              |                                                         |      |         | 547.73  | 1640.17 | 1640.72 | 43.32    | 0.019                    | HEAFESDLSAHQDR           |
|    |              |                                                         |      |         | 826.12  | 1650.22 | 1648.81 | 71.27    | 3.30E-05                 | KAGTQIENIEEDFR           |
|    |              |                                                         |      |         | 873.76  | 1745.51 | 1743.87 | 73.20    | 1.90E-05                 | DDPLGNLNLAFDIAEK         |
|    |              |                                                         |      |         | 885.47  | 1768.93 | 1768.81 | 104.59   | 1.30E-08                 | KHEAFESDLSAHQDR          |
|    |              |                                                         |      |         | 916.17  | 1830.33 | 1828.89 | 73.78    | 1.60E-05                 | MLDAEDILSTPKPDER         |
|    |              |                                                         |      |         | 969.28  | 1936.54 | 1934.98 | 74.47    | 1.30E-05                 | GDLTNPYSTITAEIEIAIK      |
|    |              |                                                         |      |         | 1000.26 | 1998.50 | 1998.01 | 57.54    | 0.00059                  | LEGDHQLIQESLIFDNK        |
|    |              |                                                         |      |         | 1050.91 | 2099.81 | 2099.09 | 86.17    | 7.90E-07                 | LNKDDPLGNLNLAFDIAEK      |
|    |              |                                                         |      |         | 942.63  | 2824.85 | 2824.40 | 71.67    | 1.40E-05                 | VEQIAAIAQELNELDYHDVASVN  |
| 20 | gi 47551317  | enolase 3, (beta, muscle) [Danio rerio]                 | 64.4 | 433     | 469.64  | 937.27  | 937.50  | 41.97    | 0.034                    | HIADLAGNK                |
|    |              |                                                         |      |         | 687.75  | 1373.49 | 1372.70 | 48.62    | 0.0067                   | HITGEQLGDLYK             |
|    |              |                                                         |      |         | 719.54  | 1437.06 | 1435.72 | 59.66    | 0.00049                  | GNPTVEVDLYTTK            |
|    |              |                                                         |      |         | 1053.98 | 2105.94 | 2104.07 | 85.69    | 8.90E-07                 | FTGSVDIQVVGDDLTVTNPK     |
|    |              |                                                         |      |         | 1060.86 | 2119.71 | 2118.12 | 60.54    | 0.00029                  | DVILPVPFNVINGGSHAGNK     |
|    |              |                                                         |      |         | 1147.92 | 2293.83 | 2295.13 | 40.61    | 0.024                    | SGETEDTFIADLVVGLCTGQIK   |
|    |              |                                                         |      |         | 1013.17 | 3036.49 | 3037.61 | 62.59    | 0.0001                   | HIADLAGNKDVILPVPFNVINGC  |
| 21 | gi 189540220 | PREDICTED: hypothetical protein LOC393472 [Danio rerio] | 38.7 | 1937    | 1224.67 | 1223.66 | 1223.61 | 43.14    | 0.023                    | TKYETDAIQR               |
|    |              |                                                         |      |         | 752.60  | 1503.19 | 1502.76 | 72.06    | 3.00E-05                 | ENQSILITGESGAGK          |
|    |              |                                                         |      |         | 761.34  | 1520.66 | 1520.76 | 65.72    | 0.00012                  | AITDAAMMAEELKK           |
|    |              |                                                         |      |         | 816.81  | 1631.60 | 1631.78 | 96.03    | 1.10E-07                 | LEEAGGATAAQIEMNK         |
|    |              |                                                         |      |         | 880.79  | 1759.56 | 1759.88 | 84.54    | 1.40E-06                 | LEEAGGATAAQIEMNKK        |

|    |              |                                                                 |      |        |         |         |         |          |                    |                      |
|----|--------------|-----------------------------------------------------------------|------|--------|---------|---------|---------|----------|--------------------|----------------------|
|    |              |                                                                 |      | 930.48 | 1858.95 | 1858.88 | 100.27  | 3.50E-08 | LEQQVDDLEGSLEQEK   |                      |
|    |              |                                                                 |      | 943.56 | 1885.10 | 1884.92 | 73.56   | 1.60E-05 | QADSV AELGEQIDNLQR |                      |
|    |              |                                                                 |      | 993.73 | 1985.45 | 1986.97 | 82.42   | 2.00E-06 | LEQQVDDLEGSLEQEKK  |                      |
| 22 | gj 189520343 | PREDICTED: similar to myosin heavy chain fast skeletal          | 48.6 | 1933   | 1224.67 | 1223.66 | 1223.61 | 43.14    | 0.023              | TKYETDAIQR           |
|    |              |                                                                 |      |        | 641.99  | 1281.96 | 1281.54 | 41.73    | 0.032              | EQYEEEQEAK           |
|    |              |                                                                 |      |        | 684.76  | 1367.50 | 1366.65 | 31.95    | 0.29               | VQHELEEAQER          |
|    |              |                                                                 |      |        | 752.60  | 1503.19 | 1502.76 | 72.06    | 3.00E-05           | ENQSILITGESGAGK      |
|    |              |                                                                 |      |        | 761.34  | 1520.66 | 1520.76 | 65.72    | 0.00012            | AITDAAMMAEELKK       |
|    |              |                                                                 |      |        | 824.74  | 1647.46 | 1647.78 | 35.76    | 0.12               | LEEAGGATSAQIEMNK     |
|    |              |                                                                 |      |        | 847.15  | 1692.29 | 1690.81 | 82.30    | 2.70E-06           | NSYEETLDHLETLK       |
|    |              |                                                                 |      |        | 930.48  | 1858.95 | 1858.88 | 100.27   | 3.50E-08           | LEQQVDDLEGSLEQEK     |
|    |              |                                                                 |      |        | 943.56  | 1885.10 | 1884.92 | 73.56    | 1.60E-05           | QADSV AELGEQIDNLQR   |
|    |              |                                                                 |      |        | 993.73  | 1985.45 | 1986.97 | 82.42    | 2.00E-06           | LEQQVDDLEGSLEQEKK    |
| 23 | gj 66472732  | myosin heavy chain 4 [Danio rerio]                              | 37.1 | 1935   | 1224.67 | 1223.66 | 1223.61 | 43.14    | 0.023              | TKYETDAIQR           |
|    |              |                                                                 |      |        | 684.76  | 1367.50 | 1367.63 | 44.43    | 0.017              | VQHELEEAER           |
|    |              |                                                                 |      |        | 1489.81 | 1488.80 | 1488.74 | 50.47    | 0.0042             | ENQSVLITGESGAGK      |
|    |              |                                                                 |      |        | 761.34  | 1520.66 | 1520.76 | 65.72    | 0.00012            | AITDAAMMAEELKK       |
|    |              |                                                                 |      |        | 816.81  | 1631.60 | 1631.78 | 96.03    | 1.10E-07           | LEEAGGATAAQIEMNK     |
|    |              |                                                                 |      |        | 880.79  | 1759.56 | 1759.88 | 84.54    | 1.40E-06           | LEEAGGATAAQIEMNKK    |
|    |              |                                                                 |      |        | 930.48  | 1858.95 | 1858.88 | 100.27   | 3.50E-08           | LEQQVDDLEGSLEQEK     |
|    |              |                                                                 |      |        | 943.56  | 1885.10 | 1884.92 | 73.56    | 1.60E-05           | QADSV AELGEQIDNLQR   |
|    |              |                                                                 |      |        | 993.73  | 1985.45 | 1986.97 | 82.42    | 2.00E-06           | LEQQVDDLEGSLEQEKK    |
|    |              |                                                                 |      |        | 1044.21 | 2086.41 | 2088.02 | 74.04    | 1.30E-05           | TKLEQQVDDLEGSLEQEK   |
|    |              |                                                                 |      |        | 1087.82 | 2173.62 | 2173.01 | 88.30    | 4.40E-07           | NDLQLAVASEAENLSDAEER |
| 24 | gj 189519129 | PREDICTED: similar to myosin heavy chain 4 [Danio rerio]        | 37.4 | 1933   | 1224.67 | 1223.66 | 1223.61 | 43.14    | 0.023              | TKYETDAIQR           |
|    |              |                                                                 |      |        | 684.76  | 1367.50 | 1367.63 | 44.43    | 0.017              | VQHELEEAER           |
|    |              |                                                                 |      |        | 1489.81 | 1488.80 | 1488.74 | 50.47    | 0.0042             | ENQSVLITGESGAGK      |
|    |              |                                                                 |      |        | 761.34  | 1520.66 | 1520.76 | 65.72    | 0.00012            | AITDAAMMAEELKK       |
|    |              |                                                                 |      |        | 816.81  | 1631.60 | 1631.78 | 96.03    | 1.10E-07           | LEEAGGATAAQIEMNK     |
|    |              |                                                                 |      |        | 880.79  | 1759.56 | 1759.88 | 84.54    | 1.40E-06           | LEEAGGATAAQIEMNKK    |
|    |              |                                                                 |      |        | 930.48  | 1858.95 | 1858.88 | 100.27   | 3.50E-08           | LEQQVDDLEGSLEQEK     |
|    |              |                                                                 |      |        | 943.56  | 1885.10 | 1884.92 | 73.56    | 1.60E-05           | QADSV AELGEQIDNLQR   |
|    |              |                                                                 |      |        | 993.73  | 1985.45 | 1986.97 | 82.42    | 2.00E-06           | LEQQVDDLEGSLEQEKK    |
|    |              |                                                                 |      |        | 1044.21 | 2086.41 | 2088.02 | 74.04    | 1.30E-05           | TKLEQQVDDLEGSLEQEK   |
|    |              |                                                                 |      |        | 1087.82 | 2173.62 | 2173.01 | 88.30    | 4.40E-07           | NDLQLAVASEAENLSDAEER |
| 25 | gj 50512294  | myosin, heavy polypeptide 2, fast muscle specific [Danio rerio] | 37.8 | 1935   | 1224.67 | 1223.66 | 1223.61 | 43.14    | 0.023              | TKYETDAIQR           |
|    |              |                                                                 |      |        | 684.76  | 1367.50 | 1367.63 | 44.43    | 0.017              | VQHELEEAER           |
|    |              |                                                                 |      |        | 1489.81 | 1488.80 | 1488.74 | 50.47    | 0.0042             | ENQSVLITGESGAGK      |
|    |              |                                                                 |      |        | 761.34  | 1520.66 | 1520.76 | 65.72    | 0.00012            | AITDAAMMAEELKK       |
|    |              |                                                                 |      |        | 816.81  | 1631.60 | 1631.78 | 96.03    | 1.10E-07           | LEEAGGATAAQIEMNK     |
|    |              |                                                                 |      |        | 880.79  | 1759.56 | 1759.88 | 84.54    | 1.40E-06           | LEEAGGATAAQIEMNKK    |
|    |              |                                                                 |      |        | 930.48  | 1858.95 | 1858.88 | 100.27   | 3.50E-08           | LEQQVDDLEGSLEQEK     |
|    |              |                                                                 |      |        | 943.56  | 1885.10 | 1884.92 | 73.56    | 1.60E-05           | QADSV AELGEQIDNLQR   |
|    |              |                                                                 |      |        | 993.73  | 1985.45 | 1986.97 | 82.42    | 2.00E-06           | LEQQVDDLEGSLEQEKK    |
|    |              |                                                                 |      |        | 1044.21 | 2086.41 | 2088.02 | 74.04    | 1.30E-05           | TKLEQQVDDLEGSLEQEK   |
|    |              |                                                                 |      |        | 1087.82 | 2173.62 | 2173.01 | 88.30    | 4.40E-07           | NDLQLAVASEAENLSDAEER |
| 26 | gj 169259784 | myosin, heavy polypeptide 1, skeletal muscle [Danio rerio]      | 36.2 | 1937   | 1224.67 | 1223.66 | 1223.61 | 43.14    | 0.023              | TKYETDAIQR           |
|    |              |                                                                 |      |        | 684.76  | 1367.50 | 1367.63 | 44.43    | 0.017              | VQHELEEAER           |
|    |              |                                                                 |      |        | 1489.81 | 1488.80 | 1488.74 | 50.47    | 0.0042             | ENQSVLITGESGAGK      |
|    |              |                                                                 |      |        | 761.34  | 1520.66 | 1520.76 | 65.72    | 0.00012            | AITDAAMMAEELKK       |
|    |              |                                                                 |      |        | 816.81  | 1631.60 | 1631.78 | 96.03    | 1.10E-07           | LEEAGGATAAQIEMNK     |
|    |              |                                                                 |      |        | 880.79  | 1759.56 | 1759.88 | 84.54    | 1.40E-06           | LEEAGGATAAQIEMNKK    |
|    |              |                                                                 |      |        | 930.48  | 1858.95 | 1858.88 | 100.27   | 3.50E-08           | LEQQVDDLEGSLEQEK     |

|    |              |                                                       |      |         |         |         |         |          |                    |                          |
|----|--------------|-------------------------------------------------------|------|---------|---------|---------|---------|----------|--------------------|--------------------------|
|    |              |                                                       |      | 943.56  | 1885.10 | 1884.92 | 73.56   | 1.60E-05 | QADSVaelGEQIDNLQR  |                          |
|    |              |                                                       |      | 993.73  | 1985.45 | 1986.97 | 82.42   | 2.00E-06 | LEQQVDDLEGSLEQEKK  |                          |
|    |              |                                                       |      | 1044.21 | 2086.41 | 2088.02 | 74.04   | 1.30E-05 | TKLEQQVDDLEGSLEQEK |                          |
| 27 | gi 29725603  | myosin, light polypeptide 7, regulatory [Danio rerio] | 79.1 | 172     | 690.02  | 1378.03 | 1377.66 | 55.55    | 0.0013             | SLCYIITHGDEK             |
|    |              |                                                       |      |         | 809.72  | 1617.43 | 1617.83 | 31.87    | 0.28               | LNGTDPEETILAAFK          |
|    |              |                                                       |      |         | 842.26  | 1682.51 | 1681.91 | 98.27    | 6.00E-08           | GPINFTVFLTLFGEK          |
|    |              |                                                       |      |         | 1047.36 | 2092.71 | 2091.96 | 75.34    | 9.40E-06           | GSSNVFSMFEQSQIQEFK       |
|    |              |                                                       |      |         | 1292.50 | 2582.99 | 2582.25 | 108.90   | 3.10E-09           | FTAAEVDQAFVAPIDVAGNIDY   |
| 28 | gi 189540216 | PREDICTED: wu:fd14a01 [Danio rerio]                   | 43   | 1936    | 1224.67 | 1223.66 | 1223.61 | 43.14    | 0.023              | TKYETDAIQR               |
|    |              |                                                       |      |         | 1489.81 | 1488.80 | 1488.74 | 50.47    | 0.0042             | ENQSVLITGESGAGK          |
|    |              |                                                       |      |         | 761.34  | 1520.66 | 1520.76 | 65.72    | 0.00012            | AITDAAMMAEELKK           |
|    |              |                                                       |      |         | 816.81  | 1631.60 | 1631.78 | 96.03    | 1.10E-07           | LEEAGGATAAQIEMNK         |
|    |              |                                                       |      |         | 880.79  | 1759.56 | 1759.88 | 84.54    | 1.40E-06           | LEEAGGATAAQIEMNKK        |
|    |              |                                                       |      |         | 930.48  | 1858.95 | 1858.88 | 100.27   | 3.50E-08           | LEQQVDDLEGSLEQEK         |
|    |              |                                                       |      |         | 943.56  | 1885.10 | 1884.92 | 73.56    | 1.60E-05           | QADSVaelGEQIDNLQR        |
|    |              |                                                       |      |         | 993.73  | 1985.45 | 1986.97 | 82.42    | 2.00E-06           | LEQQVDDLEGSLEQEKK        |
| 29 | gi 189537429 | PREDICTED: hypothetical protein [Danio rerio]         | 72.7 | 377     | 600.05  | 1198.08 | 1197.51 | 75.20    | 1.60E-05           | DSYVGDEAQS               |
|    |              |                                                       |      |         | 896.17  | 1790.32 | 1789.88 | 102.64   | 2.10E-08           | SYELPDGQVITIGNER         |
|    |              |                                                       |      |         | 1954.17 | 1953.16 | 1953.06 | 81.42    | 2.40E-06           | VAPPEHPVLLTEAPLNPK       |
| 30 | gi 18858961  | lactate dehydrogenase B4 [Danio rerio]                | 83.5 | 334     | 710.40  | 1418.78 | 1417.79 | 55.13    | 0.0015             | LITPLASGPAEPPR           |
|    |              |                                                       |      |         | 769.90  | 1537.78 | 1537.77 | 102.60   | 2.30E-08           | IVADKDYSVTANSR           |
|    |              |                                                       |      |         | 843.74  | 1685.46 | 1684.85 | 114.34   | 1.50E-09           | ELADELALVDVVEDR          |
|    |              |                                                       |      |         | 858.16  | 1714.30 | 1714.82 | 48.64    | 0.0057             | LNPDIGTDKDAENWK          |
| 31 | gi 38707983  | aconitase 2, mitochondrial [Danio rerio]              | 52.7 | 782     | 786.18  | 1570.35 | 1568.82 | 59.32    | 0.00051            | FKLEPPTGDELPAR           |
|    |              |                                                       |      |         | 857.83  | 1713.65 | 1711.84 | 77.20    | 7.70E-06           | EVNQEYVSFLASAGAK         |
|    |              |                                                       |      |         | 878.27  | 1754.52 | 1752.88 | 68.60    | 5.40E-05           | IVYGHLLDDPAGQEIAR        |
|    |              |                                                       |      |         | 954.55  | 1907.08 | 1905.98 | 68.05    | 5.40E-05           | KQGLLPLTFSNPADYDK        |
|    |              |                                                       |      |         | 1041.84 | 2081.67 | 2080.94 | 61.45    | 0.00023            | NNISWVVVGDENYEGSSR       |
|    |              |                                                       |      |         | 1267.44 | 2532.86 | 2532.29 | 120.13   | 2.40E-10           | GHLDNISNLLIGAVNIENDGVN   |
|    |              |                                                       |      |         | 1362.08 | 2722.14 | 2721.43 | 48.21    | 0.0033             | NDANPATHAFVTSPEIVTALAIAI |
| 32 | gi 47085883  | hypothetical protein LOC406405 [Danio rerio]          | 81.3 | 337     | 661.47  | 1320.92 | 1319.67 | 72.08    | 3.00E-05           | GYIGADQLGDALK            |
|    |              |                                                       |      |         | 751.89  | 1501.77 | 1502.77 | 93.73    | 2.00E-07           | VEFPADQLSALTGR           |
|    |              |                                                       |      |         | 1545.56 | 3089.10 | 3088.58 | 102.99   | 1.00E-08           | NSPLVSELSLFDIAHTPGVAADL  |
| 33 | gi 189523699 | PREDICTED: titin a [Danio rerio]                      | 50.7 | 32757   | 824.59  | 823.58  | 822.50  | 52.54    | 0.0028             | VHIVIDK                  |
|    |              |                                                       |      |         | 567.69  | 1133.36 | 1133.57 | 50.68    | 0.005              | KGDVTLSDSGR              |
|    |              |                                                       |      |         | 616.63  | 1231.24 | 1230.66 | 42.57    | 0.031              | DTATLAWTKPK              |
|    |              |                                                       |      |         | 681.12  | 1360.22 | 1359.75 | 38.80    | 0.064              | VLDRPGPPDGPLK            |
|    |              |                                                       |      |         | 781.54  | 1561.07 | 1560.75 | 40.14    | 0.042              | EHSEVIPHTQKEK            |
|    |              |                                                       |      |         | 804.70  | 1607.39 | 1605.88 | 52.60    | 0.0023             | AEDPLFLPSPPAKPK          |
|    |              |                                                       |      |         | 831.24  | 1660.46 | 1658.82 | 50.71    | 0.0037             | VNVEVEYTEPVER            |
|    |              |                                                       |      |         | 862.77  | 1723.52 | 1722.92 | 49.25    | 0.005              | AGSDLVLDAAVGGKPEPK       |
|    |              |                                                       |      |         | 877.52  | 1753.03 | 1752.99 | 43.02    | 0.02               | EAEILKPLASVEVVEK         |
|    |              |                                                       |      |         | 940.78  | 1879.54 | 1878.92 | 96.56    | 7.60E-08           | TPLHDGGAEVSHYIVER        |
|    |              |                                                       |      |         | 947.83  | 1893.64 | 1892.90 | 52.96    | 0.0018             | HTVTLSEKPDHDGGSK         |
|    |              |                                                       |      |         | 968.75  | 1935.49 | 1936.07 | 49.40    | 0.004              | AVNEAGASRPSVTAGPIVIK     |
|    |              |                                                       |      |         | 1005.77 | 2009.52 | 2009.11 | 51.51    | 0.0023             | AAPAPLHLQAVHSENLLTK      |
|    |              |                                                       |      |         | 1014.48 | 2026.94 | 2024.95 | 48.72    | 0.0044             | GNTLQSDDKYEIISEGK        |
|    |              |                                                       |      |         | 1035.13 | 2068.25 | 2067.07 | 47.02    | 0.0063             | NKFDVPDAPQNVIVGNVVK      |
|    |              |                                                       |      |         | 1052.34 | 2102.66 | 2102.05 | 88.77    | 4.40E-07           | EQVTHQAALLQSHEVQER       |
|    |              |                                                       |      |         | 708.80  | 2123.37 | 2122.13 | 68.98    | 3.90E-05           | VLDRPGPSSGPLDITGLTAEK    |
|    |              |                                                       |      |         | 1082.45 | 2162.89 | 2161.14 | 39.72    | 0.032              | VLDRPGPPEGPLTVSGVTNEK    |
|    |              |                                                       |      |         | 1098.94 | 2195.87 | 2196.14 | 55.19    | 0.00093            | VLDRPGPPDGPISIYGVVTSEK   |



|    |              |                                                        |      |         |         |         |         |          |                         |                         |
|----|--------------|--------------------------------------------------------|------|---------|---------|---------|---------|----------|-------------------------|-------------------------|
|    |              |                                                        |      | 1100.60 | 2199.18 | 2199.29 | 64.34   | 0.00012  | KEPKPESILQVISTPVPLPK    |                         |
|    |              |                                                        |      | 1114.26 | 2226.51 | 2226.10 | 51.16   | 0.0024   | EHVIEWFKPENDGGSEIK      |                         |
|    |              |                                                        |      | 1151.50 | 2300.99 | 2300.07 | 51.59   | 0.0019   | EVTNSVTLSEKPDHDGGS      |                         |
|    |              |                                                        |      | 1177.07 | 2352.13 | 2351.12 | 38.63   | 0.037    | VSWRPPSDDGGSDIFGYIVER   |                         |
|    |              |                                                        |      | 1299.87 | 2597.72 | 2597.14 | 69.48   | 2.80E-05 | EKEVEEPEEPEEEYHPSLNER   |                         |
|    |              |                                                        |      | 895.44  | 2683.29 | 2684.42 | 50.51   | 0.002    | TPILAIPLQKPGEPENFHVGDIC |                         |
|    |              |                                                        |      | 1108.51 | 3322.51 | 3321.81 | 37.42   | 0.031    | YTITATNIGTVTEEVAIILDKPG |                         |
| 34 | gj 125829449 | PREDICTED: similar to myosin heavy chain [Danio rerio] | 36   | 1945    | 609.16  | 1216.30 | 1215.63 | 44.72    | 0.019                   | AGLLGQLEEMR             |
|    |              |                                                        |      |         | 643.04  | 1284.06 | 1282.57 | 37.91    | 0.078                   | ELTYQTEEDR              |
|    |              |                                                        |      |         | 706.52  | 1411.03 | 1410.66 | 59.01    | 0.00056                 | ELTYQTEEDRK             |
|    |              |                                                        |      |         | 761.34  | 1520.66 | 1520.76 | 65.72    | 0.00012                 | AITDAAMMAEELKK          |
|    |              |                                                        |      |         | 824.74  | 1647.46 | 1647.78 | 35.76    | 0.12                    | LEEAGGATSAQIEMNK        |
|    |              |                                                        |      |         | 930.48  | 1858.95 | 1858.88 | 100.27   | 3.50E-08                | LEQQVDDLEGSLEQEK        |
|    |              |                                                        |      |         | 993.73  | 1985.45 | 1986.97 | 82.42    | 2.00E-06                | LEQQVDDLEGSLEQEKK       |
| 35 | gj 189535893 | PREDICTED: similar to myosin heavy chain [Danio rerio] | 36   | 1938    | 1224.67 | 1223.66 | 1223.61 | 43.14    | 0.023                   | TKYETDAIQR              |
|    |              |                                                        |      |         | 643.04  | 1284.06 | 1282.57 | 37.91    | 0.078                   | ELTYQTEEDR              |
|    |              |                                                        |      |         | 706.52  | 1411.03 | 1410.66 | 59.01    | 0.00056                 | ELTYQTEEDRK             |
|    |              |                                                        |      |         | 761.34  | 1520.66 | 1520.76 | 65.72    | 0.00012                 | AITDAAMMAEELKK          |
|    |              |                                                        |      |         | 930.48  | 1858.95 | 1858.88 | 100.27   | 3.50E-08                | LEQQVDDLEGSLEQEK        |
|    |              |                                                        |      |         | 993.73  | 1985.45 | 1986.97 | 82.42    | 2.00E-06                | LEQQVDDLEGSLEQEKK       |
| 36 | gj 41054651  | isocitrate dehydrogenase 2 (NADP+), mitochondrial [Dan | 57.7 | 449     | 578.00  | 1153.98 | 1153.57 | 40.85    | 0.042                   | DIFQDIFEK               |
|    |              |                                                        |      |         | 678.77  | 1355.52 | 1354.68 | 97.84    | 7.70E-08                | TIEAEEAHGTVTR           |
|    |              |                                                        |      |         | 716.14  | 1430.27 | 1428.73 | 81.19    | 3.50E-06                | FKDIFQDIFEK             |
|    |              |                                                        |      |         | 861.13  | 1720.25 | 1719.82 | 116.07   | 1.10E-09                | DQTDDQVTIDSAIATK        |
|    |              |                                                        |      |         | 1893.05 | 1892.04 | 1891.93 | 83.81    | 1.50E-06                | LNEHYVNTTDFLDAIK        |
| 37 | gj 189523697 | PREDICTED: im:6911926 [Danio rerio]                    | 52.6 | 28836   | 671.64  | 1341.26 | 1340.73 | 47.09    | 0.0091                  | VTEHTVTGLLSGK           |
|    |              |                                                        |      |         | 701.73  | 1401.45 | 1399.71 | 64.74    | 0.00016                 | HVSVEALDFIDR            |
|    |              |                                                        |      |         | 738.17  | 1474.33 | 1473.71 | 56.64    | 0.001                   | RLDETDEAQLER            |
|    |              |                                                        |      |         | 807.69  | 1613.36 | 1612.87 | 47.29    | 0.0078                  | ALDPVFKPGPPHNP          |
|    |              |                                                        |      |         | 830.81  | 1659.61 | 1660.95 | 47.43    | 0.0078                  | VIILSKPDEPQGP           |
|    |              |                                                        |      |         | 856.20  | 1710.38 | 1709.82 | 61.51    | 0.00027                 | ADSGNYTITIQNAAGSK       |
|    |              |                                                        |      |         | 862.77  | 1723.52 | 1722.92 | 49.25    | 0.005                   | AGSDLVLDAAVGGKPEPK      |
|    |              |                                                        |      |         | 872.18  | 1742.35 | 1742.87 | 33.61    | 0.17                    | AISVNIQEDENSPTVK        |
|    |              |                                                        |      |         | 877.52  | 1753.03 | 1752.99 | 43.02    | 0.02                    | EAEILKPLASVEVVEK        |
|    |              |                                                        |      |         | 885.70  | 1769.38 | 1768.91 | 59.08    | 0.00048                 | SSVTLTWVKAHDGGSK        |
|    |              |                                                        |      |         | 894.79  | 1787.56 | 1787.83 | 38.15    | 0.061                   | GENKVDVEYDEHINK         |
|    |              |                                                        |      |         | 905.42  | 1808.83 | 1807.91 | 39.53    | 0.042                   | VTLTWTAPHEDGGSPIK       |
|    |              |                                                        |      |         | 920.77  | 1839.53 | 1838.93 | 62.48    | 0.00021                 | STVSLAWKPLHDGGS         |
|    |              |                                                        |      |         | 923.72  | 1845.43 | 1845.01 | 63.56    | 0.00016                 | VQILDKPGPPAGHIEFK       |
|    |              |                                                        |      |         | 928.68  | 1855.35 | 1854.92 | 75.30    | 1.00E-05                | TSVSLSEKPIHDGGS         |
|    |              |                                                        |      |         | 935.40  | 1868.78 | 1867.88 | 35.85    | 0.097                   | TSADLQWTRPEHDGGAK       |
|    |              |                                                        |      |         | 939.89  | 1877.77 | 1877.90 | 33.61    | 0.15                    | VLNYDEEVDDTRPVSK        |
|    |              |                                                        |      |         | 950.74  | 1899.47 | 1898.91 | 53.37    | 0.0016                  | TTVTLSWEKPEHDGGS        |
|    |              |                                                        |      |         | 1002.79 | 2003.56 | 2002.96 | 75.42    | 9.50E-06                | KDNTSDDIGWVTSTHK        |
|    |              |                                                        |      |         | 1009.78 | 2017.54 | 2017.97 | 31.43    | 0.23                    | TVQPEPEEEFHPPLVDR       |
|    |              |                                                        |      |         | 1028.52 | 2055.03 | 2055.07 | 32.17    | 0.2                     | LKGDVLSASPDVEIIEDGAK    |
|    |              |                                                        |      |         | 1033.20 | 2064.39 | 2064.06 | 43.67    | 0.014                   | VISGVQDLEYTVTDVIEGK     |
|    |              |                                                        |      |         | 1039.66 | 2077.30 | 2077.08 | 43.93    | 0.014                   | HGTGEAFINLDVIDVPGPVK    |
|    |              |                                                        |      |         | 1045.72 | 2089.43 | 2089.14 | 87.49    | 5.70E-07                | DATIEIITLTKPGPPTGPVR    |
|    |              |                                                        |      |         | 1258.45 | 2514.89 | 2514.23 | 109.45   | 2.80E-09                | HTLPVDSDISSDTSVVTIPES   |
| 38 | gj 148596963 | spectrin alpha 2 [Danio rerio]                         | 49.1 | 2480    | 903.21  | 2706.60 | 2706.41 | 44.80    | 0.0077                  | TPVLAVDPVEKPGEPENFQITEI |
|    |              |                                                        |      |         | 624.57  | 1247.12 | 1246.55 | 41.19    | 0.042                   | GEIDAHEDSFK             |

|    |              |                                                    |      |         |         |         |         |          |                       |                         |
|----|--------------|----------------------------------------------------|------|---------|---------|---------|---------|----------|-----------------------|-------------------------|
|    |              |                                                    |      | 773.69  | 1545.36 | 1544.77 | 82.66   | 2.50E-06 | HALLEADVAAHQDR        |                         |
|    |              |                                                    |      | 787.22  | 1572.42 | 1571.78 | 80.51   | 3.90E-06 | HQALQAEISGHEPR        |                         |
|    |              |                                                    |      | 567.84  | 1700.48 | 1699.88 | 49.54   | 0.0044   | KHQALQAEISGHEPR       |                         |
|    |              |                                                    |      | 861.63  | 1721.25 | 1720.86 | 47.63   | 0.0076   | LIQSHPEAVDDIQEK       |                         |
|    |              |                                                    |      | 873.61  | 1745.21 | 1744.82 | 38.53   | 0.056    | LSDDNTIGQEEIQQR       |                         |
|    |              |                                                    |      | 925.80  | 1849.59 | 1848.86 | 86.05   | 9.10E-07 | KFEEFQTDLAAHEER       |                         |
|    |              |                                                    |      | 964.07  | 1926.13 | 1924.90 | 93.25   | 1.70E-07 | SSLSSAEADFSQLAELDR    |                         |
|    |              |                                                    |      | 1010.83 | 2019.65 | 2018.99 | 84.45   | 1.20E-06 | LQIASDENYKDPSNLQGK    |                         |
|    |              |                                                    |      | 1077.98 | 2153.95 | 2153.10 | 123.55  | 1.40E-10 | ALINADELANDVAGAEALLDR |                         |
|    |              |                                                    |      | 1108.81 | 2215.60 | 2215.12 | 41.10   | 0.024    | RDELITNWEQIQLATER     |                         |
|    |              |                                                    |      | 1110.29 | 2218.56 | 2219.03 | 35.74   | 0.08     | STDEAGQALLNTGHYASEEVK |                         |
|    |              |                                                    |      | 750.41  | 2248.19 | 2247.19 | 55.90   | 0.00076  | RLEAELGAHEPAIQSVLETGK |                         |
| 39 | gi 18858335  | bactin1 [Danio rerio]                              | 60.8 | 375     | 1198.50 | 1197.49 | 1197.51 | 54.95    | 0.0016                | DSYVGDEAQS              |
|    |              |                                                    |      |         | 600.05  | 1198.08 | 1197.51 | 75.20    | 1.60E-05              | DSYVGDEAQS              |
|    |              |                                                    |      |         | 896.17  | 1790.32 | 1789.88 | 102.64   | 2.10E-08              | SYELPDGQVITIGNER        |
| 40 | gi 189529246 | PREDICTED: hypothetical protein [Danio rerio]      | 54.6 | 119     | 599.36  | 1196.71 | 1195.75 | 42.35    | 0.03                  | AKLEPVVLSLK             |
|    |              |                                                    |      |         | 1050.98 | 2099.94 | 2100.09 | 88.07    | 5.10E-07              | ELTELGEQVKPHFEGIFK      |
|    |              |                                                    |      |         | 1115.07 | 2228.12 | 2228.18 | 64.05    | 0.00012               | KELTELGEQVKPHFEGIFK     |
| 41 | gi 162287365 | hemopexin [Danio rerio]                            | 61.7 | 447     | 1339.71 | 1338.70 | 1338.61 | 63.12    | 0.00022               | FHSDTIESEFK             |
|    |              |                                                    |      |         | 900.94  | 1799.87 | 1800.00 | 65.16    | 0.00011               | VGKPTHLEGYPKPLK         |
|    |              |                                                    |      |         | 720.76  | 2159.26 | 2159.07 | 35.56    | 0.086                 | GKPGGEGHKHELHHGAQLDR    |
| 42 | gi 148922875 | hypothetical protein LOC567716 [Danio rerio]       | 29   | 331     | 969.23  | 1936.45 | 1936.93 | 114.30   | 1.30E-09              | HLTTLVDDIWYYAGDR        |
| 43 | gi 54400442  | hypothetical protein LOC449795 [Danio rerio]       | 52   | 202     | 999.96  | 2996.84 | 2996.41 | 42.81    | 0.01                  | TLAAGSHAHDGQPYCHKPCY/   |
|    |              |                                                    |      |         | 1008.19 | 3021.55 | 3023.42 | 63.54    | 8.50E-05              | TLNPGGHAHDGKPYCHKPCY/   |
| 44 | gi 41054601  | voltage-dependent anion channel 2 [Danio rerio]    | 74.6 | 283     | 588.48  | 1174.94 | 1173.56 | 62.94    | 0.0003                | SEYGLTFTEK              |
|    |              |                                                    |      |         | 665.84  | 1329.67 | 1329.66 | 41.35    | 0.037                 | RSEYGLTFTEK             |
|    |              |                                                    |      |         | 1052.41 | 2102.81 | 2102.15 | 74.40    | 1.20E-05              | VNNTSLVGVGYTQSLRPGIK    |
|    |              |                                                    |      |         | 1088.83 | 2175.64 | 2174.05 | 69.95    | 3.00E-05              | WNTDNTLGTEINIEDQIAK     |
|    |              |                                                    |      |         | 1258.26 | 2514.51 | 2513.15 | 43.86    | 0.01                  | TGDFQLHTNVNDGSEFGGSIYQ  |
| 45 | gi 66792936  | tropomyosin 4 isoform 1 [Danio rerio]              | 42.3 | 284     | 777.37  | 776.36  | 776.33  | 34.17    | 0.29                  | AADESER                 |
|    |              |                                                    |      |         | 537.38  | 1072.75 | 1072.55 | 46.75    | 0.013                 | LDKENAIDR               |
|    |              |                                                    |      |         | 586.14  | 1170.26 | 1169.67 | 66.30    | 0.00013               | LVILEGELER              |
|    |              |                                                    |      |         | 622.72  | 1243.43 | 1242.65 | 73.33    | 2.50E-05              | IQLVEEELDR              |
|    |              |                                                    |      |         | 649.69  | 1297.36 | 1297.76 | 68.97    | 6.10E-05              | KLVILEGELER             |
|    |              |                                                    |      |         | 701.18  | 1400.34 | 1399.71 | 101.39   | 3.40E-08              | KAADAEGDVAALNR          |
|    |              |                                                    |      |         | 770.10  | 1538.18 | 1537.71 | 79.43    | 4.80E-06              | SIDDLEDELYAQA           |
| 46 | gi 47085765  | hypothetical protein LOC406325 [Danio rerio]       | 94.2 | 397     | 594.84  | 1187.66 | 1187.68 | 73.04    | 2.90E-05              | ITAHLVHELRL             |
|    |              |                                                    |      |         | 649.07  | 1296.12 | 1294.70 | 56.75    | 0.00099               | RTPFGTYGGVLK            |
|    |              |                                                    |      |         | 683.58  | 1365.14 | 1364.63 | 58.96    | 0.00059               | DHSATDLAEHAAK           |
|    |              |                                                    |      |         | 931.96  | 1861.91 | 1861.98 | 116.41   | 8.40E-10              | TNVNGGAIAIGHPLGASGTR    |
| 47 | gi 47086021  | aldolase a, fructose-bisphosphate, b [Danio rerio] | 60.4 | 364     | 530.65  | 1059.29 | 1058.57 | 51.67    | 0.0044                | KELSDIAQR               |
|    |              |                                                    |      |         | 660.09  | 1318.16 | 1317.68 | 91.48    | 3.60E-07              | GILAADESTGSAK           |
|    |              |                                                    |      |         | 777.08  | 1552.14 | 1550.70 | 74.99    | 1.40E-05              | FQSINAENTEENR           |
|    |              |                                                    |      |         | 876.65  | 1751.28 | 1749.80 | 94.12    | 1.60E-07              | GDTGAAAGESLFFVANHAY     |
|    |              |                                                    |      |         | 1174.96 | 2347.90 | 2347.17 | 50.36    | 0.0025                | GVVPLAGTNGETTTQGLDGLYE  |
| 48 | gi 18858587  | elongation factor 1-alpha [Danio rerio]            | 48.7 | 462     | 530.52  | 1588.54 | 1587.87 | 53.53    | 0.0019                | THINIVVIGHVDSGK         |
|    |              |                                                    |      |         | 973.27  | 2916.77 | 2917.55 | 75.00    | 6.50E-06              | EGNASGTTLLDALDAILPPSRPT |
| 49 | gi 41053595  | nucleoside diphosphate kinase-Z2 [Danio rerio]     | 85.6 | 153     | 1099.44 | 1098.43 | 1098.53 | 56.37    | 0.0013                | NLIHGSDSEK              |
|    |              |                                                    |      |         | 665.79  | 1329.57 | 1329.74 | 31.80    | 0.32                  | TFIAVKPDGVQR            |
|    |              |                                                    |      |         | 795.45  | 1588.88 | 1588.88 | 78.54    | 6.10E-06              | LVAAKFVQASEDLAK         |
|    |              |                                                    |      |         | 1040.08 | 2078.14 | 2077.09 | 80.53    | 3.00E-06              | YTSSGPLLAMVWEGLNVIK     |
|    |              |                                                    |      |         | 1106.98 | 2211.95 | 2211.12 | 83.98    | 1.20E-06              | SAATEVSLWFKPEELVSYR     |

|    |              |                                                              |      |     |         |         |         |        |          |                           |
|----|--------------|--------------------------------------------------------------|------|-----|---------|---------|---------|--------|----------|---------------------------|
| 50 | gi 40254659  | bactin2 [Danio rerio]                                        | 42.7 | 375 | 1198.50 | 1197.49 | 1197.51 | 54.95  | 0.0016   | DSYVGDEAQSK               |
|    |              |                                                              |      |     | 600.05  | 1198.08 | 1197.51 | 75.20  | 1.60E-05 | DSYVGDEAQSK               |
|    |              |                                                              |      |     | 1954.17 | 1953.16 | 1953.06 | 81.42  | 2.40E-06 | VAPEEHPVLLTEAPLNPK        |
| 51 | gi 41387136  | hypothetical protein LOC393781 [Danio rerio]                 | 52.3 | 128 | 902.23  | 1802.45 | 1801.94 | 110.64 | 3.40E-09 | YHVSETPFAISAQKPK          |
|    |              |                                                              |      |     | 915.41  | 2743.19 | 2742.29 | 43.40  | 0.01     | LFPGDVILETGEVVPDFPEDSHC   |
| 52 | gi 8395615   | cytochrome c oxidase subunit II [Danio rerio]                | 37.4 | 230 | 442.41  | 882.81  | 882.46  | 55.83  | 0.0013   | LLETDHR                   |
|    |              |                                                              |      |     | 1068.14 | 2134.27 | 2133.18 | 99.87  | 3.30E-08 | ILVSAEDVLHSWAVPSLGIK      |
|    |              |                                                              |      |     | 905.75  | 2714.23 | 2715.50 | 31.08  | 0.18     | ESPIRILVSAEDVLHSWAVPSLG   |
| 53 | gi 40786398  | pyruvate kinase, muscle, a [Danio rerio]                     | 58.5 | 532 | 819.21  | 1636.41 | 1635.88 | 37.13  | 0.081    | GVNLPGAAVDLPVAVSEK        |
|    |              |                                                              |      |     | 882.38  | 1762.75 | 1763.98 | 115.54 | 1.20E-09 | KGVNLPGAAVDLPVAVSEK       |
|    |              |                                                              |      |     | 938.02  | 1874.03 | 1872.82 | 42.98  | 0.018    | MNFSHGSHEYHGETIK          |
| 54 | gi 62955689  | hypothetical protein LOC550556 [Danio rerio]                 | 66.3 | 270 | 843.26  | 1684.50 | 1682.84 | 89.86  | 4.20E-07 | AFAEFLTEEIKEEK            |
| 55 | gi 41282154  | aldolase a, fructose-bisphosphate [Danio rerio]              | 61.3 | 364 | 530.65  | 1059.29 | 1058.57 | 51.67  | 0.0044   | KELSDIAQR                 |
|    |              |                                                              |      |     | 660.09  | 1318.16 | 1317.68 | 91.48  | 3.60E-07 | GILAADESTGSAK             |
|    |              |                                                              |      |     | 1427.77 | 1426.76 | 1426.72 | 45.39  | 0.013    | PHAYPFLTPEQK              |
|    |              |                                                              |      |     | 777.08  | 1552.14 | 1550.70 | 74.99  | 1.40E-05 | FQSINAENTEENR             |
|    |              |                                                              |      |     | 1174.96 | 2347.90 | 2347.17 | 50.36  | 0.0025   | GVVPLAGTNGETTTQGLDGLYE    |
| 56 | gi 38488731  | natriuretic peptide precursor A [Danio rerio]                | 60.4 | 106 | 1026.70 | 2051.39 | 2049.99 | 106.07 | 8.20E-09 | SLLQQFEEALATEEASER        |
|    |              |                                                              |      |     | 1182.79 | 2363.56 | 2362.99 | 76.92  | 5.70E-06 | DREEAAAPGEDSNPSDGFDTQI    |
| 57 | gi 48762657  | enolase 1, (alpha) [Danio rerio]                             | 51.4 | 432 | 1147.92 | 2293.83 | 2295.13 | 40.61  | 0.024    | SGETEDTFIADLVVGLCTGQIK    |
|    |              |                                                              |      |     | 1504.37 | 3006.73 | 3006.57 | 90.04  | 1.90E-07 | HIADLAGNPVILPVPFNVINGC    |
| 58 | gi 47086807  | acyl-Coenzyme A dehydrogenase, very long chain [Danio rerio] | 57.1 | 659 | 577.56  | 1153.10 | 1152.61 | 48.98  | 0.0064   | VEEHTLQGLK                |
|    |              |                                                              |      |     | 638.66  | 1275.30 | 1275.65 | 46.36  | 0.012    | SFGGVSSGPPEKK             |
|    |              |                                                              |      |     | 837.28  | 1672.54 | 1671.94 | 94.37  | 1.50E-07 | AIEQFGAVIEELLLK           |
|    |              |                                                              |      |     | 872.48  | 2614.41 | 2614.37 | 42.99  | 0.012    | AGLGSGLTLQGTVHPELNHSGE    |
| 59 | gi 147906978 | hypothetical protein LOC492719 [Danio rerio]                 | 70.1 | 603 | 1059.42 | 2116.82 | 2115.97 | 81.90  | 2.00E-06 | GKEYDDLIDEFMQAVTDK        |
|    |              |                                                              |      |     | 736.20  | 2205.58 | 2204.05 | 33.56  | 0.13     | SHLNHEKEEFAHDHPIK         |
|    |              |                                                              |      |     | 1380.08 | 2758.14 | 2756.52 | 35.10  | 0.071    | TLEEVVETIKPTAIGVAAIGGAFI  |
|    |              |                                                              |      |     | 1005.22 | 3012.64 | 3013.43 | 105.12 | 6.00E-09 | HISDDIFLTTAEAISEMVTTEEHLA |
| 60 | gi 18858427  | creatine kinase, muscle a [Danio rerio]                      | 50.4 | 381 | 754.52  | 1507.03 | 1506.70 | 35.38  | 0.12     | GGDDLDPNYVLSSR            |
|    |              |                                                              |      |     | 998.78  | 1995.54 | 1993.93 | 91.51  | 2.40E-07 | GTGGVDTASVGGVFDISNADR     |
|    |              |                                                              |      |     | 1076.62 | 2151.22 | 2150.04 | 34.27  | 0.12     | RGTGGVDTASVGGVFDISNADF    |
| 61 | gi 189517521 | PREDICTED: hypothetical protein [Danio rerio]                | 36.4 | 143 | 935.31  | 1868.61 | 1867.99 | 94.68  | 1.30E-07 | IDDLLGALSSLSLHATK         |
| 62 | gi 157787181 | creatine kinase CKM3 [Danio rerio]                           | 51.3 | 380 | 754.52  | 1507.03 | 1506.70 | 35.38  | 0.12     | GGDDLDPNYVLSSR            |
|    |              |                                                              |      |     | 998.78  | 1995.54 | 1993.93 | 91.51  | 2.40E-07 | GTGGVDTASVGGVFDISNADR     |
|    |              |                                                              |      |     | 1076.62 | 2151.22 | 2150.04 | 34.27  | 0.12     | RGTGGVDTASVGGVFDISNADF    |
| 63 | gi 117606264 | sarcalumenin [Danio rerio]                                   | 62.7 | 482 | 1738.02 | 1737.01 | 1735.95 | 88.70  | 5.50E-07 | AITHELPSLLGSINSGK         |
|    |              |                                                              |      |     | 957.65  | 1913.29 | 1912.97 | 35.94  | 0.091    | EEISLLEDLNQVIENR          |
|    |              |                                                              |      |     | 1036.33 | 2070.65 | 2069.08 | 98.98  | 4.10E-08 | REEISLLEDLNQVIENR         |
| 64 | gi 47085773  | glutamic-oxaloacetic transaminase 1, soluble [Danio rerio]   | 44.4 | 410 | 844.91  | 1687.81 | 1687.84 | 103.16 | 2.10E-08 | NIDYVAESIHEAVTK           |
|    |              |                                                              |      |     | 1114.35 | 2226.68 | 2226.03 | 41.35  | 0.023    | NLFAFFDSAYQGFASGDLEK      |
|    |              |                                                              |      |     | 1291.46 | 2580.90 | 2579.28 | 55.51  | 0.00067  | MIADDHSLNHEYLPIGLPEFR     |
|    |              |                                                              |      |     | 1103.95 | 3308.81 | 3308.59 | 32.16  | 0.1      | TPVYVSAPTWENHNAVFSNAGF    |
| 65 | gi 47271422  | triosephosphate isomerase 1b [Danio rerio]                   | 82.3 | 248 | 1458.82 | 1457.81 | 1457.72 | 75.26  | 1.40E-05 | HVFGESDELIGQK             |
|    |              |                                                              |      |     | 802.24  | 1602.47 | 1601.88 | 64.30  | 0.00016  | VVLAYEPVWAIGTGK           |
|    |              |                                                              |      |     | 808.26  | 1614.50 | 1613.82 | 63.83  | 0.00018  | RHVFGESDELIGQK            |
|    |              |                                                              |      |     | 1216.41 | 2430.81 | 2431.30 | 86.70  | 5.30E-07 | DLDGFLVGGASLKPEFIDIINAK   |
| 66 | gi 50344894  | tropomyosin 2 (beta) [Danio rerio]                           | 33.5 | 284 | 777.37  | 776.36  | 776.33  | 34.17  | 0.29     | AADESER                   |
|    |              |                                                              |      |     | 537.38  | 1072.75 | 1072.55 | 46.75  | 0.013    | LDKENAIDR                 |
|    |              |                                                              |      |     | 586.14  | 1170.26 | 1169.67 | 66.30  | 0.00013  | LVILEGELER                |
|    |              |                                                              |      |     | 622.72  | 1243.43 | 1242.65 | 73.33  | 2.50E-05 | IQLVEEELDR                |
|    |              |                                                              |      |     | 649.69  | 1297.36 | 1297.76 | 68.97  | 6.10E-05 | KLVILEGELER               |

|    |              |                                                                              |      |      |         |         |         |        |          |                           |
|----|--------------|------------------------------------------------------------------------------|------|------|---------|---------|---------|--------|----------|---------------------------|
| 67 | gi 189538466 | PREDICTED: similar to alpha 2 actin [Danio rerio]                            | 46.2 | 132  | 1114.80 | 2227.58 | 2227.06 | 62.75  | 0.00016  | DLYANNVLSGGTTMYPGIADR     |
| 68 | gi 41054435  | tropomyosin alpha-4 chain [Danio rerio]                                      | 20.6 | 248  | 1178.43 | 2354.85 | 2355.15 | 135.42 | 8.00E-12 | KDLYANNVLSGGTTMYPGIADR    |
|    |              |                                                                              |      |      | 777.37  | 776.36  | 776.33  | 34.17  | 0.29     | AADESER                   |
|    |              |                                                                              |      |      | 586.14  | 1170.26 | 1169.67 | 66.30  | 0.00013  | LVILEGELER                |
|    |              |                                                                              |      |      | 622.72  | 1243.43 | 1242.65 | 73.33  | 2.50E-05 | IQLVEEELDR                |
| 69 | gi 50539808  | hypothetical protein LOC436647 [Danio rerio]                                 | 49.7 | 525  | 649.69  | 1297.36 | 1297.76 | 68.97  | 6.10E-05 | KLVILEGELER               |
|    |              |                                                                              |      |      | 968.42  | 1934.82 | 1932.99 | 40.30  | 0.032    | VNAGDQPGADVGPLISPQAK      |
|    |              |                                                                              |      |      | 1006.23 | 2010.44 | 2009.00 | 95.36  | 9.20E-08 | SSQWLDIHNPATSEVIGR        |
| 70 | gi 41053939  | malate dehydrogenase 1a, NAD (soluble) [Danio rerio]                         | 55.1 | 305  | 730.84  | 1459.66 | 1459.79 | 56.96  | 0.00094  | EVIPTDKVEVGFK             |
|    |              |                                                                              |      |      | 855.08  | 1708.14 | 1706.82 | 100.12 | 4.20E-08 | EIAAFDAVNDES WLK          |
|    |              |                                                                              |      |      | 877.76  | 2630.26 | 2631.29 | 87.23  | 4.40E-07 | NVTIWGNHSSTQYPDVHHAIVTI   |
| 71 | gi 50540358  | hypothetical protein LOC436918 [Danio rerio]                                 | 66.7 | 357  | 1252.70 | 1251.69 | 1251.62 | 69.12  | 6.10E-05 | LHAVNDAEVER               |
|    |              |                                                                              |      |      | 1111.95 | 2221.88 | 2220.13 | 94.16  | 1.10E-07 | NAITVEMYNELIEALELAGK      |
|    |              |                                                                              |      |      | 1315.03 | 2628.05 | 2626.36 | 76.50  | 5.20E-06 | QQYVDLISSLVGAEAPAVAAQP    |
| 72 | gi 66773050  | myosin, heavy polypeptide 11, smooth muscle [Danio rerio]                    | 37.7 | 1974 | 1000.33 | 1998.64 | 1997.92 | 68.53  | 4.70E-05 | ELEGHISDLQEDLESER         |
|    |              |                                                                              |      |      | 1007.71 | 2013.41 | 2012.04 | 58.97  | 0.00041  | TLEAELLQLQEDLAAAER        |
|    |              |                                                                              |      |      | 1066.71 | 2131.40 | 2131.00 | 69.02  | 4.10E-05 | QVEAERDELADELASNASGK      |
| 73 | gi 47087077  | phosphoglycerate kinase 1 [Danio rerio]                                      | 60.4 | 417  | 916.46  | 915.45  | 915.45  | 52.89  | 0.0034   | FHVAEEGK                  |
|    |              |                                                                              |      |      | 818.24  | 1634.46 | 1633.78 | 84.76  | 1.40E-06 | LGDVYVNDAFGTAHR           |
|    |              |                                                                              |      |      | 1740.87 | 1739.86 | 1739.91 | 58.16  | 0.00059  | VSHVSTGGGASLELLEGGK       |
|    |              |                                                                              |      |      | 926.88  | 1851.75 | 1850.97 | 49.52  | 0.004    | ITLPVDFITADKFDEK          |
|    |              |                                                                              |      |      | 801.08  | 2400.20 | 2400.17 | 46.35  | 0.0065   | QIVWNGPVGVFEWDFAHGTK      |
| 74 | gi 40538764  | ceruloplasmin [Danio rerio]                                                  | 36.1 | 1087 | 805.83  | 1609.65 | 1609.72 | 87.83  | 6.90E-07 | SVNKEDADFQESNK            |
|    |              |                                                                              |      |      | 828.53  | 1655.05 | 1654.78 | 117.55 | 7.00E-10 | LVDDIVSDTFFDNR            |
|    |              |                                                                              |      |      | 1287.86 | 2573.71 | 2573.23 | 102.88 | 1.20E-08 | VSWHLSGLGSETDIHGLYFEGN    |
| 75 | gi 50344790  | hypothetical protein LOC415158 [Danio rerio]                                 | 47.1 | 104  | 608.49  | 1214.96 | 1214.66 | 57.95  | 0.0009   | VGPNLWGLFGR               |
|    |              |                                                                              |      |      | 745.36  | 1488.71 | 1487.65 | 60.28  | 0.00043  | TGQAEGFSYTDANK            |
|    |              |                                                                              |      |      | 808.82  | 1615.63 | 1615.75 | 107.78 | 7.00E-09 | KTGQAEGFSYTDANK           |
|    |              |                                                                              |      |      | 998.19  | 1994.37 | 1992.95 | 53.43  | 0.0015   | GIVWGEDTLMEYLENPK         |
| 76 | gi 157426949 | hydroxyacyl-Coenzyme A dehydrogenase/3-ketoacyl-CoA synthetase [Danio rerio] | 66.4 | 761  | 653.09  | 1304.16 | 1303.71 | 82.76  | 2.70E-06 | MQLLEIITTDK               |
|    |              |                                                                              |      |      | 698.19  | 1394.36 | 1392.67 | 54.97  | 0.0015   | LSGQLDYHGFEK              |
|    |              |                                                                              |      |      | 837.73  | 1673.45 | 1672.93 | 67.82  | 6.80E-05 | MGLVHQLVDPLGPGGLK         |
| 77 | gi 47086069  | hypothetical protein LOC406529 [Danio rerio]                                 | 74.6 | 283  | 1348.76 | 1347.75 | 1347.70 | 53.27  | 0.0022   | LGLDTSFVPNTGK             |
|    |              |                                                                              |      |      | 930.44  | 1858.86 | 1858.82 | 97.79  | 6.00E-08 | SQSGVEFTTGGSSNTDTGK       |
|    |              |                                                                              |      |      | 1030.87 | 2059.73 | 2058.12 | 72.35  | 1.90E-05 | VNNASLVGVGYTQSLRPGVK      |
| 78 | gi 136429    | Trypsin precursor                                                            | 75.4 | 232  | 1105.98 | 2209.95 | 2210.10 | 98.95  | 3.90E-08 | LGEHNIDVLEGNEQFINAAK      |
| 79 | gi 113195582 | hypothetical protein LOC556489 [Danio rerio]                                 | 67.7 | 226  | 723.80  | 1445.58 | 1445.78 | 65.41  | 0.00014  | VIFEAEETKPGVK             |
|    |              |                                                                              |      |      | 881.46  | 2641.36 | 2641.29 | 69.67  | 2.50E-05 | SPDPAAVEHKPEESKPEESKPE    |
| 80 | gi 48762665  | ubiquinol-cytochrome c reductase core protein II [Danio rerio]               | 46.9 | 454  | 1245.76 | 1244.75 | 1244.68 | 78.80  | 7.70E-06 | KVDFAAAGEPLK              |
|    |              |                                                                              |      |      | 696.14  | 1390.27 | 1390.71 | 74.71  | 1.70E-05 | GVEAVGGSLSVSSSR           |
| 81 | gi 61806484  | hypothetical protein LOC541328 [Danio rerio]                                 | 66.4 | 116  | 840.79  | 1679.57 | 1677.88 | 85.12  | 1.30E-06 | TTGLVGLAVSQN PHER         |
| 82 | gi 41152346  | hypothetical protein LOC393668 [Danio rerio]                                 | 52.9 | 433  | 1147.92 | 2293.83 | 2295.13 | 40.61  | 0.024    | SGETEDTFIADLVVGLCTGQIK    |
|    |              |                                                                              |      |      | 1008.42 | 3022.23 | 3020.58 | 72.22  | 1.20E-05 | HIADLAGNPEVILPVPAFN VINGC |
| 83 | gi 24119234  | triosephosphate isomerase 1a [Danio rerio]                                   | 78.6 | 248  | 1458.82 | 1457.81 | 1457.72 | 75.26  | 1.40E-05 | HVFGESDELIGQK             |
|    |              |                                                                              |      |      | 802.24  | 1602.47 | 1601.88 | 64.30  | 0.00016  | VVLAYEPVWAIGTGK           |
|    |              |                                                                              |      |      | 808.26  | 1614.50 | 1613.82 | 63.83  | 0.00018  | RHVFGESDELIGQK            |
| 84 | gi 41055718  | fumarate hydratase precursor [Danio rerio]                                   | 42.2 | 509  | 719.05  | 2154.12 | 2153.18 | 71.07  | 2.50E-05 | EVHEVLLPGLQTLHDALAAK      |
|    |              |                                                                              |      |      | 1251.93 | 2501.85 | 2501.26 | 77.23  | 4.70E-06 | THTQDAVPLSLGQEFGGYVQQ     |
| 85 | gi 148224245 | hypothetical protein LOC793834 [Danio rerio]                                 | 68.9 | 763  | 653.09  | 1304.16 | 1303.71 | 82.76  | 2.70E-06 | MQLLEIITTDK               |
|    |              |                                                                              |      |      | 804.74  | 1607.47 | 1606.81 | 72.46  | 2.40E-05 | DVNTEALEILEAYK            |
|    |              |                                                                              |      |      | 1195.44 | 3583.28 | 3583.84 | 76.05  | 3.50E-06 | KLDSLTTGFGFPVGAATLADEV    |
| 86 | gi 47085923  | pyruvate dehydrogenase (lipoamide) beta [Danio rerio]                        | 54.6 | 359  | 880.40  | 1758.79 | 1758.94 | 83.05  | 1.90E-06 | SIRPLDADTIETSITK          |

|     |              |                                                              |      |      |         |         |         |        |          |                          |
|-----|--------------|--------------------------------------------------------------|------|------|---------|---------|---------|--------|----------|--------------------------|
| 87  | gi 47086479  | solute carrier family 25 (mitochondrial carrier, Aralar), me | 55.3 | 682  | 1325.66 | 1324.65 | 1324.74 | 91.10  | 3.60E-07 | TVHLLAGVADTTK            |
|     |              |                                                              |      |      | 677.63  | 1353.24 | 1352.69 | 51.33  | 0.0033   | SSGISTIHPEPK             |
|     |              |                                                              |      |      | 1057.39 | 2112.76 | 2113.04 | 73.43  | 1.50E-05 | WLYVDFGGHRPAGSEPTPK      |
| 88  | gi 58801524  | LIM domain containing preferred translocation partner in     | 62.2 | 556  | 1097.90 | 2193.79 | 2193.06 | 52.39  | 0.0018   | AEPShHPAPTPSQGYQPAPPK    |
|     |              |                                                              |      |      | 1398.18 | 2794.34 | 2793.39 | 116.45 | 5.10E-10 | SSLDAEIDSLTSILADLESSSPYK |
| 89  | gi 189530625 | PREDICTED: similar to spectrin repeat containing, nuclea     | 37.7 | 8621 | 550.32  | 1098.62 | 1097.66 | 69.95  | 6.10E-05 | QLADAIAKLR               |
| 90  | gi 189535572 | PREDICTED: hypothetical protein [Danio rerio]                | 69.5 | 455  | 759.60  | 1517.19 | 1517.74 | 36.85  | 0.096    | CPDCPGLLPLHEPK           |
|     |              |                                                              |      |      | 824.81  | 1647.61 | 1645.83 | 39.41  | 0.053    | KCPDCPGLLPLHEPK          |
|     |              |                                                              |      |      | 654.45  | 1960.33 | 1959.96 | 51.31  | 0.0025   | FHDHRPGSVHPLGPDHR        |
| 91  | gi 41055728  | ATPase, Ca++ transporting, cardiac muscle, slow twitch ;     | 45.8 | 996  | 732.69  | 1463.37 | 1463.67 | 47.19  | 0.0088   | IRDEMASTEQER             |
|     |              |                                                              |      |      | 733.60  | 1465.19 | 1464.92 | 72.90  | 2.30E-05 | ISLPVILLDELLK            |
|     |              |                                                              |      |      | 733.61  | 1465.21 | 1463.67 | 49.86  | 0.0046   | IRDEMASTEQER             |
|     |              |                                                              |      |      | 1526.85 | 1525.84 | 1524.80 | 69.48  | 4.90E-05 | DIVPGDIVEVAVGDK          |
| 92  | gi 156713467 | vitellogenin 7 [Danio rerio]                                 | 50.7 | 1358 | 587.14  | 1172.27 | 1172.62 | 59.04  | 0.00071  | LEFEVQVGPR               |
|     |              |                                                              |      |      | 1215.56 | 1214.55 | 1214.59 | 42.98  | 0.028    | THYVINEDPK               |
|     |              |                                                              |      |      | 1069.54 | 2137.07 | 2135.16 | 100.74 | 2.60E-08 | ISDATAQIVEVLTHLVANNK     |
| 93  | gi 189533438 | PREDICTED: novel protein similar to vertebrate apolipop      | 42.5 | 2633 | 1230.46 | 2458.90 | 2458.19 | 90.98  | 2.00E-07 | HAINQEINAYNTPAQFGLEGSGI  |
| 94  | gi 41053873  | succinate dehydrogenase complex, subunit A, flavoprotei      | 65.4 | 661  | 738.51  | 1475.00 | 1473.75 | 73.92  | 1.90E-05 | KHTLSYVDPETGK            |
|     |              |                                                              |      |      | 1291.54 | 2581.07 | 2582.14 | 56.25  | 0.00057  | DGQDHVVPGLYACGEAGCASV    |
| 95  | gi 47086523  | ictacalcin [Danio rerio]                                     | 57.9 | 95   | 696.55  | 1391.08 | 1390.73 | 96.62  | 1.10E-07 | ELLSAELGDIFGK            |
| 96  | gi 189528827 | PREDICTED: similar to LOC567732 protein [Danio rerio]        | 35.9 | 1368 | 1212.60 | 2423.18 | 2422.19 | 102.56 | 1.50E-08 | GQNHLEEVELAFPQNVIEGSGR   |
|     |              |                                                              |      |      | 988.87  | 2963.58 | 2964.31 | 50.87  | 0.0017   | VFSSDGSSTVTVQSAGDSHHFI   |
| 97  | gi 47777306  | Voltage-dependent anion channel 1 [Danio rerio]              | 53.4 | 283  | 660.08  | 1318.14 | 1317.64 | 60.19  | 0.00048  | WAEHGLTFTEK              |
|     |              |                                                              |      |      | 1045.46 | 2088.90 | 2088.16 | 88.25  | 4.80E-07 | VNNSLVGLGYTQTLKPGIK      |
| 98  | gi 56090150  | NADH dehydrogenase (ubiquinone) Fe-S protein 1 [Danio        | 54.9 | 731  | 1570.97 | 3139.92 | 3139.56 | 100.34 | 1.60E-08 | DSFIVYQGHGHDVGAPIADVILP  |
| 99  | gi 47086533  | 2-peptidylprolyl isomerase A [Danio rerio]                   | 70.7 | 164  | 820.21  | 1638.40 | 1637.91 | 103.88 | 1.70E-08 | HVVFGQVVEGLDVIK          |
| 100 | gi 189516653 | PREDICTED: myosin, heavy chain 9, non-muscle like-1,         | 31.4 | 1754 | 575.27  | 1722.79 | 1721.89 | 60.94  | 0.00033  | KQELEEILHDLEAR           |
|     |              |                                                              |      |      | 958.30  | 1914.58 | 1913.91 | 68.34  | 5.30E-05 | HSQAFDELNEQLEQVK         |
|     |              |                                                              |      |      | 893.88  | 2678.62 | 2678.38 | 79.43  | 2.70E-06 | KLEGDSTELHDQIAELQAQIAEL  |
| 101 | gi 189522028 | PREDICTED: similar to myomesin [Danio rerio]                 | 52.9 | 923  | 1508.67 | 1507.66 | 1507.73 | 82.72  | 2.30E-06 | FKGEFDESPLSPR            |
|     |              |                                                              |      |      | 1301.70 | 3902.07 | 3901.05 | 52.45  | 0.00066  | KGASAPWTGQIIVTEEEPVEGVA  |
| 102 | gi 82658182  | cytochrome c-1 [Danio rerio]                                 | 59.9 | 307  | 714.58  | 1427.15 | 1425.71 | 80.63  | 4.00E-06 | NLVGVSHTEDEVK            |
|     |              |                                                              |      |      | 1310.72 | 2619.42 | 2618.22 | 38.78  | 0.031    | TLAEEIEVVDGPDNDGEMFTRP   |
| 103 | gi 68448513  | hypothetical protein LOC574004 [Danio rerio]                 | 56.1 | 187  | 968.51  | 967.50  | 966.55  | 60.55  | 0.00047  | HVLATLGEK                |
|     |              |                                                              |      |      | 757.17  | 1512.33 | 1511.69 | 84.44  | 1.60E-06 | DQGTFFEDFVEGLR           |
| 104 | gi 70778734  | ATPase, Na+/K+ transporting, alpha 3b polypeptide [Dan       | 46.3 | 1023 | 924.66  | 1847.31 | 1846.81 | 86.28  | 8.50E-07 | YQLSIHETEDNNDNR          |
| 105 | gi 51972166  | radixin isoform 1 [Danio rerio]                              | 43.5 | 579  | 704.77  | 1407.53 | 1407.78 | 68.51  | 6.30E-05 | HLLALTSELANAR            |
|     |              |                                                              |      |      | 1683.89 | 1682.88 | 1682.85 | 73.28  | 1.90E-05 | NQEHLATELAELTSK          |
|     |              |                                                              |      |      | 1027.33 | 2052.65 | 2052.96 | 44.28  | 0.012    | FYPEDVSEELIQEATQR        |
| 106 | gi 189529437 | PREDICTED: similar to plectin 1 isoform 1 [Danio rerio]      | 42.4 | 4530 | 1032.88 | 2063.74 | 2062.11 | 98.98  | 4.10E-08 | DGHNLISLLEVLVSGETLPR     |
| 107 | gi 189529439 | PREDICTED: similar to plectin 1 isoform 2 [Danio rerio]      | 42.4 | 4506 | 1032.88 | 2063.74 | 2062.11 | 98.98  | 4.10E-08 | DGHNLISLLEVLVSGETLPR     |
| 108 | gi 57526509  | propionyl-Coenzyme A carboxylase, alpha polypeptide [C       | 56.6 | 709  | 1164.68 | 1163.67 | 1164.65 | 55.10  | 0.0016   | HIEIQVLADK               |
|     |              |                                                              |      |      | 826.01  | 1650.00 | 1649.84 | 65.94  | 0.00011  | TVAVHSDVDSSAVHVK         |
|     |              |                                                              |      |      | 945.77  | 1889.53 | 1887.95 | 48.08  | 0.0055   | LTGAQAVHPGYGFLSENK       |
| 109 | gi 189526600 | PREDICTED: similar to dystonin [Danio rerio]                 | 43.8 | 8365 | 1032.88 | 2063.74 | 2062.11 | 98.98  | 4.10E-08 | DGHNLISLLEVLVSGETLPR     |
| 110 | gi 153792369 | si:dkey-151c10.1 [Danio rerio]                               | 32.9 | 4577 | 1032.88 | 2063.74 | 2062.11 | 98.98  | 4.10E-08 | DGHNLISLLEVLVSGETLPR     |
| 111 | gi 47086247  | proto galectin Gal1-L2 [Danio rerio]                         | 82.1 | 134  | 1339.12 | 2676.23 | 2675.32 | 66.46  | 5.40E-05 | ITFTNEEFVLTLPDGSEIHFPNR  |
| 112 | gi 41055546  | hypothetical protein LOC393186 [Danio rerio]                 | 38.1 | 281  | 1348.76 | 1347.75 | 1347.70 | 51.96  | 0.003    | VALDTSFVPNTGK            |
|     |              |                                                              |      |      | 973.05  | 1944.09 | 1942.85 | 73.38  | 1.50E-05 | SQNGVEFNTSGSTNTDTGK      |
|     |              |                                                              |      |      | 1044.26 | 2086.51 | 2086.15 | 55.93  | 0.00082  | VNNASLIGIGYTQSLRPGVK     |
| 113 | gi 18858959  | lactate dehydrogenase A4 [Danio rerio]                       | 48.3 | 333  | 755.98  | 1509.94 | 1509.77 | 80.77  | 3.60E-06 | IVADKDYSVTANSK           |
| 114 | gi 74315945  | hypothetical protein LOC613246 [Danio rerio]                 | 54   | 422  | 1047.77 | 2093.53 | 2092.98 | 84.98  | 1.00E-06 | ALVGNASEELQSADGNPHR      |

|     |              |                                                                  |      |      |         |         |         |        |          |                           |
|-----|--------------|------------------------------------------------------------------|------|------|---------|---------|---------|--------|----------|---------------------------|
| 115 | gi 47087061  | glutamic-oxaloacetic transaminase 2a, mitochondrial (aspartate)  | 62.1 | 428  | 644.14  | 1286.26 | 1284.69 | 49.82  | 0.0053   | GALDDISKIPEK              |
|     |              |                                                                  |      |      | 665.76  | 1994.24 | 1994.03 | 43.33  | 0.016    | YFIEQGHNILLSQSFAK         |
|     |              |                                                                  |      |      | 784.38  | 2350.11 | 2350.26 | 58.13  | 0.00043  | ISVAGVTSANVEYLAHAHAVTK    |
| 116 | gi 47085679  | electron-transfer-flavoprotein, beta polypeptide [Danio rerio]   | 63.8 | 254  | 924.89  | 923.88  | 924.50  | 63.43  | 0.00023  | GIHVEVSGK                 |
|     |              |                                                                  |      |      | 601.23  | 1200.44 | 1199.71 | 71.48  | 3.90E-05 | KEEASLIILGK               |
| 117 | gi 71834286  | hypothetical protein LOC321166 [Danio rerio]                     | 52.4 | 3730 | 637.94  | 1273.86 | 1273.71 | 79.51  | 5.90E-06 | SKVEEILSELK               |
|     |              |                                                                  |      |      | 967.39  | 1932.77 | 1931.96 | 72.74  | 1.80E-05 | TLHLDDSIDSVHPIQDK         |
|     |              |                                                                  |      |      | 1036.26 | 3105.74 | 3105.49 | 38.48  | 0.027    | YDAEEIEAEVSSDVTTEIHNIITTI |
| 118 | gi 47086819  | tyrosine 3-monooxygenase/tryptophan 5-monooxygenase              | 48.6 | 255  | 1044.76 | 2087.51 | 2086.96 | 98.21  | 4.80E-08 | AAFDDAIAELDTLSEESYK       |
| 119 | gi 71892474  | ATPase, Ca++ transporting, cardiac muscle, slow twitch isoform 1 | 40.3 | 1035 | 733.61  | 1465.21 | 1463.67 | 49.86  | 0.0046   | IRDEMASTEQER              |
|     |              |                                                                  |      |      | 1526.85 | 1525.84 | 1524.80 | 69.48  | 4.90E-05 | DIVPGDIVEVAVGDK           |
| 120 | gi 41054770  | WD repeat domain 1 [Danio rerio]                                 | 56.6 | 606  | 1296.44 | 2590.87 | 2589.21 | 86.27  | 5.70E-07 | AHDGGIYAVSWSPDSTQLISASG   |
| 121 | gi 41152400  | peptidylprolyl isomerase A, like [Danio rerio]                   | 64   | 164  | 686.49  | 1370.97 | 1370.73 | 87.95  | 7.60E-07 | VVDGLDVVDAIEK             |
| 122 | gi 47271384  | cofilin 2, like [Danio rerio]                                    | 80.6 | 165  | 996.00  | 1989.98 | 1989.06 | 62.79  | 0.00017  | KEDLVFIFWAPESAPLK         |
|     |              |                                                                  |      |      | 1207.39 | 2412.76 | 2412.16 | 63.61  | 0.00012  | HIIMEQQQEILQGDEGDPYLK     |
| 123 | gi 113678983 | hypothetical protein LOC751707 [Danio rerio]                     | 52.8 | 606  | 810.47  | 1618.93 | 1617.74 | 31.69  | 0.29     | QLCPOMETASPGGIK           |
|     |              |                                                                  |      |      | 1091.31 | 2180.60 | 2179.07 | 79.39  | 3.60E-06 | GGENIYPAEIEQFLHHPK        |
| 124 | gi 47174755  | myosin light chain alkali, smooth-muscle isoform [Danio rerio]   | 69.5 | 151  | 757.17  | 1512.33 | 1511.69 | 84.44  | 1.60E-06 | DQGTFFDFVEGLR             |
| 125 | gi 41055855  | aldehyde dehydrogenase 4 family, member A1 [Danio rerio]         | 40.6 | 556  | 1044.55 | 2087.08 | 2086.97 | 68.40  | 4.60E-05 | VGDPVEDFSTFFSAVIDDK       |
| 126 | gi 66773138  | cytochrome c oxidase subunit Vaa [Danio rerio]                   | 58.9 | 141  | 565.40  | 1128.79 | 1128.63 | 54.53  | 0.0021   | RLDDLASAIR                |
|     |              |                                                                  |      |      | 1658.57 | 3315.12 | 3313.73 | 47.65  | 0.0028   | EIYPYVIQELRPTLDELGIATPEE  |
|     |              |                                                                  |      |      | 1694.17 | 3386.32 | 3384.77 | 46.69  | 0.0032   | EIYPYVIQELRPTLDELGIATPEE  |
| 127 | gi 47087349  | coagulation factor II [Danio rerio]                              | 63.5 | 524  | 674.76  | 1347.50 | 1345.80 | 80.64  | 4.30E-06 | IVAIDEIIVHPK              |
| 128 | gi 23308625  | fatty acid binding protein 3, muscle and heart [Danio rerio]     | 56.4 | 133  | 749.63  | 1497.24 | 1496.63 | 69.94  | 4.40E-05 | LGEEFDETTADDR             |
|     |              |                                                                  |      |      | 813.62  | 1625.23 | 1624.72 | 62.83  | 0.00022  | LGEEFDETTADDRK            |
| 129 | gi 189519969 | PREDICTED: myosin, heavy polypeptide 10, non-muscle              | 39.7 | 1973 | 580.67  | 1738.97 | 1737.89 | 69.98  | 4.00E-05 | KQELEEILHDLESR            |
|     |              |                                                                  |      |      | 1093.83 | 2185.64 | 2184.99 | 76.48  | 7.20E-06 | HAEQERDELADEISNSASGK      |
| 130 | gi 41282194  | glutamate dehydrogenase 1 [Danio rerio]                          | 51.7 | 542  | 785.85  | 1569.68 | 1568.77 | 91.97  | 2.80E-07 | IIEGANGPTTPDADK           |
| 131 | gi 51571925  | hypothetical protein LOC445486 [Danio rerio]                     | 51   | 194  | 902.00  | 1801.98 | 1800.95 | 49.53  | 0.0043   | INSELPVDEVFAIVEK          |
|     |              |                                                                  |      |      | 965.71  | 1929.41 | 1929.05 | 73.55  | 1.50E-05 | KINSELPVDEVFAIVEK         |
| 132 | gi 113678458 | vitellogenin 2 isoform 1 [Danio rerio]                           | 56.8 | 1631 | 587.14  | 1172.27 | 1172.62 | 59.04  | 0.00071  | LEFEVQVGPR                |
|     |              |                                                                  |      |      | 925.36  | 1848.71 | 1847.86 | 65.37  | 0.00011  | LSENADSEIETETPVK          |
| 133 | gi 41152342  | creatine kinase, mitochondrial 2 (sarcomeric) [Danio rerio]      | 48.2 | 413  | 1041.29 | 2080.57 | 2079.97 | 95.84  | 8.60E-08 | GTGGVDTAAVGDTFDISNLDR     |
|     |              |                                                                  |      |      | 1119.27 | 2236.53 | 2236.07 | 41.96  | 0.018    | RGTGGVDTAAVGDTFDISNLDR    |
| 134 | gi 80751141  | solute carrier family 8 (sodium/calcium exchanger), member 1     | 31.8 | 974  | 985.15  | 1968.29 | 1968.04 | 63.87  | 0.00014  | EGVILPIWTPVNPSPFGDK       |
|     |              |                                                                  |      |      | 1002.61 | 3004.79 | 3003.40 | 32.64  | 0.11     | TEDGTANAGSDYQFTEGVIIIFKF  |
| 135 | gi 49274617  | tropomyosin 1 alpha [Danio rerio]                                | 39.1 | 284  | 777.37  | 776.36  | 776.33  | 34.17  | 0.29     | AADESER                   |
|     |              |                                                                  |      |      | 537.38  | 1072.75 | 1072.55 | 46.75  | 0.013    | LDKENALDR                 |
|     |              |                                                                  |      |      | 622.72  | 1243.43 | 1242.65 | 73.33  | 2.50E-05 | IQLVEEELDR                |
| 136 | gi 18859505  | alpha-tropomyosin [Danio rerio]                                  | 29.2 | 284  | 777.37  | 776.36  | 776.33  | 34.17  | 0.29     | AADESER                   |
|     |              |                                                                  |      |      | 537.38  | 1072.75 | 1072.55 | 46.75  | 0.013    | LDKENALDR                 |
|     |              |                                                                  |      |      | 622.72  | 1243.43 | 1242.65 | 73.33  | 2.50E-05 | IQLVEEELDR                |
| 137 | gi 189537447 | PREDICTED: similar to Ndufa9 protein [Danio rerio]               | 48.2 | 380  | 691.30  | 1380.58 | 1379.71 | 71.30  | 3.40E-05 | FFEAAVGEAKPSK             |
| 138 | gi 189535578 | PREDICTED: fetuin B [Danio rerio]                                | 48.2 | 498  | 1117.51 | 2233.01 | 2233.01 | 59.36  | 0.00035  | KDETHEHDHEIVLDHDK         |
|     |              |                                                                  |      |      | 797.59  | 2389.73 | 2389.01 | 53.15  | 0.0012   | AHEHGQDEWEHQHHQYGHK       |
| 139 | gi 31044489  | heat shock 60 kD protein 1 [Danio rerio]                         | 71.5 | 575  | 602.23  | 1202.45 | 1200.63 | 35.42  | 0.16     | NAGVEGSLVVEK              |
|     |              |                                                                  |      |      | 814.72  | 2441.14 | 2439.35 | 53.75  | 0.0011   | TALLDAAGVASLLSTAEAVVTEII  |
|     |              |                                                                  |      |      | 942.90  | 2825.66 | 2825.53 | 79.28  | 2.50E-06 | TALLDAAGVASLLSTAEAVVTEII  |
| 140 | gi 41151982  | major vault protein [Danio rerio]                                | 58.6 | 863  | 804.76  | 1607.51 | 1607.71 | 34.39  | 0.15     | DDEGQVQFDGSGQVK           |
|     |              |                                                                  |      |      | 1019.64 | 2037.26 | 2036.88 | 108.34 | 4.70E-09 | AVEAFIDTQGDEAESEEER       |
| 141 | gi 27545193  | creatine kinase, brain [Danio rerio]                             | 35.4 | 381  | 754.52  | 1507.03 | 1506.70 | 35.38  | 0.12     | GGDDLDPNYVLSSR            |
|     |              |                                                                  |      |      | 894.58  | 1787.15 | 1785.94 | 47.27  | 0.0074   | GIESLSVEALGALDGLK         |

|     |              |                                                               |      |        |         |         |         |          |                                   |
|-----|--------------|---------------------------------------------------------------|------|--------|---------|---------|---------|----------|-----------------------------------|
|     |              |                                                               |      | 990.39 | 1978.76 | 1977.94 | 66.42   | 7.80E-05 | GTGGVDTAAVGGVFDISNADR             |
| 142 | gi 57525836  | hypothetical protein LOC445175 [Danio rerio]                  | 65.4 | 697    | 1302.96 | 1301.95 | 1301.66 | 64.35    | 0.00018 SHIDELYANIK               |
| 143 | gi 189535920 | PREDICTED: similar to Filamin-A (Alpha-filamin) (Filamir      | 62.8 | 2523   | 650.58  | 1299.14 | 1298.73 | 38.57    | 0.068 VTVLFAGQHISK                |
|     |              |                                                               |      |        | 720.86  | 1439.70 | 1437.71 | 32.98    | 0.22 TFEPAEFIIDTR                 |
|     |              |                                                               |      |        | 824.65  | 1647.29 | 1645.89 | 49.61    | 0.0051 VHGPGLQSGITNKPNK           |
|     |              |                                                               |      |        | 901.26  | 1800.50 | 1799.96 | 62.58    | 0.00021 VAKPDITDNKDGTVTVK         |
|     |              |                                                               |      |        | 1207.46 | 2412.90 | 2411.15 | 54.31    | 0.001 EGPYSINVLVADEEIPQSPYK       |
| 144 | gi 68433600  | PREDICTED: similar to LOC495046 protein isoform 1 [D:         | 44.6 | 1056   | 1526.85 | 1525.84 | 1524.80 | 69.48    | 4.90E-05 DIVPGDIVEVAVGDK          |
| 145 | gi 45387763  | hypothetical protein LOC402975 [Danio rerio]                  | 33.1 | 284    | 777.37  | 776.36  | 776.33  | 34.17    | 0.29 AADESER                      |
|     |              |                                                               |      |        | 622.72  | 1243.43 | 1242.65 | 73.33    | 2.50E-05 IQLVEEELDR               |
| 146 | gi 41393141  | tropomyosin 3 [Danio rerio]                                   | 35.9 | 248    | 777.37  | 776.36  | 776.33  | 34.17    | 0.29 AADESER                      |
|     |              |                                                               |      |        | 622.72  | 1243.43 | 1242.65 | 73.33    | 2.50E-05 IQLVEEELDR               |
| 147 | gi 50345022  | small muscle protein, X-linked [Danio rerio]                  | 83.1 | 83     | 1037.69 | 2073.37 | 2072.97 | 79.66    | 3.70E-06 REDTVETEEVSPVTPEEK       |
| 148 | gi 47777298  | inner membrane protein, mitochondrial (mitofilin) [Danio r    | 38   | 757    | 1066.23 | 2130.45 | 2130.11 | 36.16    | 0.08 AELDALAALTAGLEETLGSSAK       |
|     |              |                                                               |      |        | 732.40  | 2194.16 | 2192.18 | 37.50    | 0.053 VTLQAIGAQAALTAIAAHTDK       |
|     |              |                                                               |      |        | 893.21  | 2676.59 | 2677.37 | 79.30    | 2.70E-06 IDSARPQILAAEENLHSMIVDLDF |
| 149 | gi 21426837  | glucose phosphate isomerase b [Danio rerio]                   | 40.3 | 553    | 780.76  | 1559.51 | 1558.78 | 80.43    | 4.10E-06 KELEAGGLSGDNLEK          |
|     |              |                                                               |      |        | 1127.20 | 3378.58 | 3376.65 | 55.39    | 0.00044 VNYHTGPVWGEPTNGQHAFV      |
| 150 | gi 59858543  | gelsolin a [Danio rerio]                                      | 33.3 | 730    | 1071.90 | 2141.79 | 2141.06 | 98.83    | 4.30E-08 MLEVLGEKPDLPYGASDDVK     |
| 151 | gi 189526930 | PREDICTED: similar to c-Cbl associated protein [Danio r       | 34.1 | 1015   | 918.74  | 1835.46 | 1834.94 | 67.53    | 6.80E-05 HAGLVVTHQQFITNDR         |
| 152 | gi 189521338 | PREDICTED: hypothetical protein [Danio rerio]                 | 36.3 | 523    | 789.78  | 1577.54 | 1577.76 | 37.55    | 0.077 YDVQVQIENVEDK               |
|     |              |                                                               |      |        | 790.64  | 1579.27 | 1577.76 | 97.12    | 8.10E-08 YDVQVQIENVEDK            |
| 153 | gi 38707985  | electron-transfer-flavoprotein, alpha polypeptide [Danio r    | 75.1 | 333    | 552.89  | 1103.76 | 1102.56 | 37.70    | 0.099 SDRPELTSK                   |
|     |              |                                                               |      |        | 713.59  | 1425.17 | 1424.81 | 56.10    | 0.0011 LDVAPISDIEIK               |
|     |              |                                                               |      |        | 1105.34 | 2208.66 | 2207.12 | 63.10    | 0.00015 DPEAPIFQVADYGLVADLFK      |
| 154 | gi 47550793  | nicotinamide nucleotide transhydrogenase [Danio rerio]        | 34.2 | 1079   | 1268.85 | 1267.84 | 1266.75 | 32.36    | 0.28 VAISPAGVEALIK                |
|     |              |                                                               |      |        | 707.70  | 1413.39 | 1412.74 | 49.47    | 0.0051 GVIHVGYTDIPSR              |
|     |              |                                                               |      |        | 790.14  | 1578.26 | 1577.77 | 42.94    | 0.021 QGFNVVVEGAGESAK             |
|     |              |                                                               |      |        | 922.25  | 2763.71 | 2763.39 | 60.04    | 0.00022 DGSVVVDLAAEAGNIETTVPD     |
| 155 | gi 41386743  | eukaryotic translation elongation factor 2, like [Danio reric | 55.5 | 858    | 1073.30 | 2144.58 | 2144.05 | 65.62    | 8.60E-05 ARPFPDGLAEDIDKGDVSSR     |
| 156 | gi 27545251  | solute carrier family 25 alpha, member 5 [Danio rerio]        | 52   | 298    | 525.09  | 1048.16 | 1047.57 | 57.91    | 0.00098 VFLDGVDKR                 |
|     |              |                                                               |      |        | 617.63  | 1233.24 | 1232.68 | 51.16    | 0.0042 DFLAGGIAAAISK              |
| 157 | gi 125832496 | PREDICTED: similar to mCG2694 [Danio rerio]                   | 64   | 308    | 550.28  | 1098.55 | 1098.61 | 51.62    | 0.004 QLADALKANR                  |
| 158 | gi 51011067  | pyruvate kinase, muscle, b [Danio rerio]                      | 59.2 | 530    | 904.59  | 1807.16 | 1806.98 | 63.88    | 0.00016 KGVNLPGANVDLPVSEK         |
|     |              |                                                               |      |        | 942.87  | 1883.72 | 1882.90 | 67.23    | 6.40E-05 LNFSHGTHEYHAETIK         |
| 159 | gi 41152448  | NADH dehydrogenase (ubiquinone) 1 alpha subcomplex,           | 46.2 | 355    | 1228.47 | 2454.93 | 2454.31 | 67.96    | 4.20E-05 LLQYSDAVEHLLTTGQGVLIER   |
| 160 | gi 46559752  | ATPase, Na+/K+ transporting, beta 1a polypeptide [Danic       | 35.9 | 306    | 700.18  | 1398.35 | 1398.75 | 68.66    | 6.10E-05 REEEANLLGQIK             |
| 161 | gi 52219190  | hypothetical protein LOC447942 [Danio rerio]                  | 46.6 | 103    | 1167.53 | 3499.56 | 3500.62 | 52.81    | 0.00075 TKPWPWGDGNHSLFHNPHNTA     |
| 162 | gi 70778808  | vesicle amine transport protein 1 [Danio rerio]               | 43.4 | 484    | 818.92  | 1635.82 | 1635.85 | 57.52    | 0.00075 GLDIVLDPLGGSDTHK          |
|     |              |                                                               |      |        | 904.73  | 1807.45 | 1806.90 | 69.62    | 4.20E-05 HEVISQGGVTHPIDYR         |
| 163 | gi 166795887 | vitellogenin 1 [Danio rerio]                                  | 52.3 | 1362   | 587.14  | 1172.27 | 1172.62 | 59.04    | 0.00071 LEFEVQVGPR                |
|     |              |                                                               |      |        | 1215.56 | 1214.55 | 1214.59 | 42.98    | 0.028 THYVINEDPK                  |
| 164 | gi 160420306 | hypothetical protein LOC678536 [Danio rerio]                  | 55   | 1358   | 587.14  | 1172.27 | 1172.62 | 59.04    | 0.00071 LEFEVQVGPR                |
|     |              |                                                               |      |        | 1215.56 | 1214.55 | 1214.59 | 42.98    | 0.028 THYVINEDPK                  |
| 165 | gi 68448530  | vitellogenin 5 [Danio rerio]                                  | 48   | 1360   | 587.14  | 1172.27 | 1172.62 | 59.04    | 0.00071 LEFEVQVGPR                |
|     |              |                                                               |      |        | 1215.56 | 1214.55 | 1214.59 | 42.98    | 0.028 THYVINEDPK                  |
| 166 | gi 189520787 | PREDICTED: tyrosine 3-monooxygenase/tryptophan 5-m            | 52.5 | 244    | 1073.02 | 2144.03 | 2143.98 | 72.71    | 1.70E-05 TAFDEAIAELDTLNEDSYK      |
| 167 | gi 47085905  | tyrosine 3-monooxygenase/tryptophan 5-monooxygenase           | 43.8 | 242    | 1073.02 | 2144.03 | 2143.98 | 72.71    | 1.70E-05 TAFDEAIAELDTLNEDSYK      |
| 168 | gi 154707842 | methylmalonyl Coenzyme A mutase [Danio rerio]                 | 48.7 | 757    | 786.15  | 1570.29 | 1568.84 | 47.95    | 0.007 NTQIIIQEEESGIPK             |
|     |              |                                                               |      |        | 870.13  | 1738.25 | 1737.81 | 79.76    | 4.30E-06 SEFGEHEEIALAHNR          |
| 169 | gi 116004537 | hypothetical protein LOC564694 [Danio rerio]                  | 47   | 381    | 754.52  | 1507.03 | 1506.70 | 35.38    | 0.12 GGDDLDPNYVLSSR               |
|     |              |                                                               |      |        | 990.39  | 1978.76 | 1977.94 | 66.42    | 7.80E-05 GTGGVDTAAVGGVFDISNADR    |

|     |              |                                                                                  |      |      |         |         |         |       |          |                          |
|-----|--------------|----------------------------------------------------------------------------------|------|------|---------|---------|---------|-------|----------|--------------------------|
| 170 | gi 68444865  | PREDICTED: dodecenoyl-Coenzyme A delta isomerase                                 | 49.5 | 301  | 663.70  | 1325.39 | 1325.71 | 64.04 | 0.00019  | IGLVDELVPEDK             |
| 171 | gi 41393119  | valosin containing protein [Danio rerio]                                         | 63   | 806  | 905.89  | 1809.76 | 1809.99 | 55.96 | 0.00096  | NAPAIIFIDELDAIPK         |
|     |              |                                                                                  |      |      | 912.63  | 1823.24 | 1822.91 | 66.85 | 7.70E-05 | ELQELVQYPVEHPDK          |
| 172 | gi 68362804  | PREDICTED: similar to Histone H4 replacement CG3379                              | 76.7 | 103  | 447.35  | 446.34  | 445.26  | 32.55 | 0.015    | GKGGK                    |
|     |              |                                                                                  |      |      | 495.62  | 989.22  | 988.57  | 40.93 | 0.054    | VFLENVIR                 |
|     |              |                                                                                  |      |      | 591.57  | 1181.13 | 1179.61 | 59.87 | 0.00053  | ISGLIYEETR               |
|     |              |                                                                                  |      |      | 664.19  | 1326.36 | 1324.75 | 49.37 | 0.0057   | DNIQGITKPAIR             |
| 173 | gi 54400698  | hydroxysteroid (17-beta) dehydrogenase 10 [Danio rerio]                          | 63.1 | 260  | 852.76  | 1703.51 | 1702.86 | 86.75 | 8.30E-07 | HGASAVILDLPSSDGHK        |
| 174 | gi 113679439 | hypothetical protein LOC751638 [Danio rerio]                                     | 46   | 126  | 636.68  | 1271.35 | 1272.68 | 66.20 | 0.00012  | GQDPYSILRPK              |
|     |              |                                                                                  |      |      | 468.43  | 1402.27 | 1400.78 | 36.47 | 0.11     | KGQDPYSILRPK             |
| 175 | gi 18858399  | cadherin 2, neuronal [Danio rerio]                                               | 38.8 | 783  | 938.76  | 1875.50 | 1873.93 | 45.48 | 0.01     | SAAPHPGDIGEFIHEGLK       |
|     |              |                                                                                  |      |      | 1148.53 | 3442.55 | 3440.82 | 72.69 | 8.00E-06 | YSVTGPGADQNPTGLFIIDPISGI |
| 176 | gi 47086189  | propionyl Coenzyme A carboxylase, beta polypeptide [Danio rerio]                 | 70.7 | 557  | 874.24  | 1746.46 | 1744.85 | 85.36 | 1.20E-06 | AYDMLDIVHGVDER           |
| 177 | gi 45387563  | ADP-ribosylation factor-like 8Ba [Danio rerio]                                   | 45.2 | 186  | 1276.92 | 2551.83 | 2551.45 | 68.47 | 3.50E-05 | NELHNLLDKPQLQGIPVVLVGNK  |
| 178 | gi 56693302  | heat shock protein, alpha-crystallin-related, 1 [Danio rerio]                    | 48.2 | 199  | 581.73  | 1161.44 | 1159.64 | 63.81 | 0.00023  | TKDGVLEITGK              |
|     |              |                                                                                  |      |      | 920.97  | 1839.93 | 1839.94 | 50.96 | 0.0029   | ISLDVNHFSPEELNVK         |
| 179 | gi 136256027 | phosphorylase, glycogen; brain [Danio rerio]                                     | 42.2 | 843  | 954.50  | 1906.99 | 1905.00 | 61.61 | 0.00024  | LITSVGEVVNHDPVVGDR       |
| 180 | gi 50344731  | fibrinogen alpha chain [Danio rerio]                                             | 41.5 | 684  | 677.11  | 1352.21 | 1350.70 | 80.92 | 3.60E-06 | LGISDSEFLTAAK            |
| 181 | gi 54400460  | fibulin 5 [Danio rerio]                                                          | 40.7 | 477  | 1111.43 | 2220.84 | 2220.00 | 80.84 | 2.50E-06 | NSPLPYPEASYPEEPYDPR      |
| 182 | gi 50540420  | branched chain aminotransferase 2, mitochondrial [Danio rerio]                   | 55.4 | 415  | 900.90  | 1799.79 | 1799.02 | 52.09 | 0.0023   | SSVLKPKPDPSTLVFGK        |
| 183 | gi 41056123  | phosphoglycerate mutase 2 (muscle) [Danio rerio]                                 | 54.5 | 255  | 633.57  | 1265.13 | 1263.70 | 50.58 | 0.0042   | NVIAAHGNSLR              |
|     |              |                                                                                  |      |      | 672.48  | 1342.95 | 1342.57 | 41.92 | 0.031    | HGESSWNQENR              |
|     |              |                                                                                  |      |      | 1058.87 | 2115.72 | 2115.10 | 36.73 | 0.068    | DLKPIKPMQFLGDEETVR       |
| 184 | gi 189517050 | PREDICTED: glycine C-acetyltransferase [Danio rerio]                             | 57.9 | 458  | 785.68  | 1569.34 | 1568.74 | 68.82 | 5.70E-05 | VQISAAHTDEDIDR           |
| 185 | gi 68444185  | PREDICTED: cytochrome c oxidase subunit Vab [Danio rerio]                        | 61   | 172  | 565.40  | 1128.79 | 1127.64 | 45.39 | 0.017    | RLNDLASAIR               |
|     |              |                                                                                  |      |      | 1106.47 | 3316.39 | 3314.75 | 67.87 | 2.60E-05 | EIYPYVIQELKPTLQELGISTPEE |
| 186 | gi 41056085  | keratin 8 [Danio rerio]                                                          | 35.6 | 520  | 545.21  | 1088.41 | 1087.55 | 50.59 | 0.0054   | KLLEGEEDR                |
|     |              |                                                                                  |      |      | 1009.39 | 2016.76 | 2017.16 | 59.54 | 0.00036  | SLLAPLNLEIDPNIQIVR       |
| 187 | gi 168229163 | cysteine-rich protein 2 [Danio rerio]                                            | 65.5 | 206  | 990.03  | 2967.06 | 2968.41 | 48.11 | 0.0031   | TLTAGGHAHDGKPYCHKPCY/    |
|     |              |                                                                                  |      |      | 999.96  | 2996.84 | 2996.41 | 42.81 | 0.01     | TLAAGSHAHDGQPYCHKPCY/    |
| 188 | gi 41053395  | glutamate oxaloacetate transaminase 2 [Danio rerio]                              | 62.4 | 428  | 926.44  | 1850.87 | 1850.98 | 45.42 | 0.011    | ALDKEYLGIVGLGDFNK        |
|     |              |                                                                                  |      |      | 665.76  | 1994.24 | 1994.03 | 43.33 | 0.016    | YFIEQGHNILLSQSFAC        |
| 189 | gi 51467909  | ATP synthase, H+ transporting, mitochondrial F1 complex, b subunit [Danio rerio] | 72.7 | 209  | 638.04  | 1274.07 | 1272.67 | 50.07 | 0.0052   | SLDKVEQELGR              |
|     |              |                                                                                  |      |      | 920.66  | 1839.30 | 1838.03 | 54.42 | 0.0013   | VSPITINLINVLSSENGR       |
| 190 | gi 18859045  | mitochondrial carrier homolog 2 [Danio rerio]                                    | 43.7 | 300  | 843.43  | 1684.84 | 1684.96 | 56.86 | 0.00085  | VLVQVGHEPLAPTLGR         |
| 191 | gi 41055658  | 3-hydroxyisobutyrate dehydrogenase b [Danio rerio]                               | 65.3 | 329  | 865.98  | 1729.95 | 1729.95 | 62.94 | 0.0002   | KGSLIDSSTIDPAVSK         |
| 192 | gi 41152453  | tyrosine 3-monooxygenase/tryptophan 5-monooxygenase [Danio rerio]                | 40.4 | 245  | 782.16  | 1562.31 | 1560.73 | 50.70 | 0.0038   | AVTEGDIELSNEER           |
|     |              |                                                                                  |      |      | 1073.02 | 2144.03 | 2143.98 | 56.16 | 0.00077  | TAFDEAIAELDSLNEESYK      |
| 193 | gi 50540382  | hypothetical protein LOC436930 [Danio rerio]                                     | 51.3 | 460  | 1078.38 | 2154.75 | 2154.01 | 73.62 | 1.40E-05 | ISVDHLQQFFDNNYTSAR       |
| 194 | gi 189532432 | PREDICTED: novel protein similar to vertebrate AT rich protein [Danio rerio]     | 33.9 | 2113 | 653.09  | 1304.16 | 1303.77 | 57.14 | 0.00099  | RCLIEIFGILK              |
| 195 | gi 189532434 | PREDICTED: im:7160733 [Danio rerio]                                              | 36.5 | 1248 | 653.09  | 1304.16 | 1303.77 | 57.14 | 0.00099  | RCLIEIFGILK              |
| 196 | gi 56118264  | actinin alpha 3 [Danio rerio]                                                    | 35.6 | 896  | 826.12  | 1650.22 | 1648.81 | 71.27 | 3.30E-05 | KAGTQIENIEEDFR           |
| 197 | gi 41054603  | actinin alpha 4 [Danio rerio]                                                    | 39.7 | 901  | 826.12  | 1650.22 | 1648.81 | 71.27 | 3.30E-05 | KAGTQIENIEEDFR           |
| 198 | gi 153791915 | hypothetical protein LOC100006671 [Danio rerio]                                  | 37.7 | 151  | 826.12  | 1650.22 | 1648.81 | 71.27 | 3.30E-05 | KAGTQIENIEEDFR           |
| 199 | gi 51467931  | enolase 2 [Danio rerio]                                                          | 56.7 | 434  | 1147.92 | 2293.83 | 2295.13 | 40.61 | 0.024    | SGETEDTFIADLVVGLCTGQIK   |
|     |              |                                                                                  |      |      | 1009.55 | 3025.62 | 3024.58 | 41.01 | 0.015    | HIADLAGNTELVLPVPAFNVINGI |
| 200 | gi 150378483 | heat shock protein, alpha-crystallin-related, b11 [Danio rerio]                  | 57.6 | 205  | 1113.16 | 2224.31 | 2223.99 | 70.86 | 2.50E-05 | NPALQNSEPENQAVEAEAAEN    |
| 201 | gi 61651682  | fibronectin 1b [Danio rerio]                                                     | 47.9 | 2408 | 806.73  | 2417.17 | 2416.31 | 46.22 | 0.0064   | SAPLVGTATTQLISGLPSLPSHG  |
|     |              |                                                                                  |      |      | 1070.65 | 3208.93 | 3208.44 | 59.70 | 0.00019  | INTVGPTGHDSTDAHGQHVEYT   |
| 202 | gi 47085833  | glyceraldehyde-3-phosphate dehydrogenase, spermatozoan [Danio rerio]             | 21.2 | 335  | 718.69  | 1435.37 | 1434.76 | 70.02 | 4.60E-05 | GAHQNIIPASTGAAK          |
| 203 | gi 57528846  | hypothetical protein LOC445255 [Danio rerio]                                     | 49.3 | 207  | 770.14  | 1538.26 | 1537.87 | 69.95 | 4.30E-05 | AEEDKIPLLLVGNK           |
| 204 | gi 18858657  | fatty acid binding protein 7, brain, a [Danio rerio]                             | 28.8 | 132  | 749.63  | 1497.24 | 1496.63 | 69.94 | 4.40E-05 | LGEEFDETTADDR            |



|     |              |                                                          |      |      |         |         |         |       |          |                         |
|-----|--------------|----------------------------------------------------------|------|------|---------|---------|---------|-------|----------|-------------------------|
| 205 | gi 54606886  | hexokinase 1 [Danio rerio]                               | 60.1 | 918  | 638.68  | 1275.35 | 1274.50 | 64.37 | 0.00019  | HMDMVEGDEGR             |
|     |              |                                                          |      |      | 862.32  | 1722.62 | 1723.83 | 36.50 | 0.096    | TKYDDAVDDLNLNAGK        |
| 206 | gi 55925387  | carnitine palmitoyltransferase II [Danio rerio]          | 53   | 668  | 816.40  | 1630.78 | 1631.90 | 43.55 | 0.02     | DGNLIKPAEVQAHLK         |
|     |              |                                                          |      |      | 1127.33 | 2252.65 | 2252.11 | 56.20 | 0.00073  | YLAAQRPLLNDEQYSNTEK     |
| 207 | gi 68389723  | PREDICTED: catechol-O-methyltransferase domain cont      | 80.7 | 238  | 1028.82 | 2055.62 | 2055.00 | 68.70 | 4.40E-05 | SHEGDDPLLQYVVNNSLR      |
| 208 | gi 189536521 | PREDICTED: similar to phosphofructokinase, platelet [Dre | 55.5 | 789  | 1115.74 | 2229.46 | 2229.10 | 60.89 | 0.00024  | TSYDVSDSGQLEHVVVNRPK    |
| 209 | gi 52219158  | aquaporin 8 [Danio rerio]                                | 20.4 | 260  | 1058.75 | 2115.49 | 2113.97 | 68.39 | 4.60E-05 | SELFTVATGDGGDNHQNPQPK   |
| 210 | gi 189546569 | PREDICTED: complement component 3 [Danio rerio]          | 40.6 | 1648 | 763.11  | 1524.21 | 1523.75 | 66.87 | 8.80E-05 | AAVVHGEMVGDVQGR         |
| 211 | gi 51010955  | hypothetical protein LOC445042 [Danio rerio]             | 39.4 | 104  | 608.74  | 1215.47 | 1215.65 | 66.19 | 0.00014  | ALTAGESEASGKPK          |
| 212 | gi 41152334  | ATP synthase, H+ transporting, mitochondrial F0 comple:  | 46   | 161  | 573.43  | 1144.85 | 1144.54 | 66.01 | 0.00015  | IDAQEQEANK              |
| 213 | gi 57526735  | glutaredoxin 5 [Danio rerio]                             | 29   | 155  | 1106.67 | 2211.33 | 2209.97 | 64.91 | 9.70E-05 | MHGVDNYASYNVLDQDQDVR    |
| 214 | gi 41056175  | programmed cell death 8 (apoptosis-inducing factor) [Dan | 43.7 | 751  | 736.65  | 1471.28 | 1471.66 | 64.47 | 0.00016  | SAGLEVSDSDFGGYR         |
| 215 | gi 27545305  | laminin, gamma 1 [Danio rerio]                           | 63.3 | 1593 | 665.17  | 1328.32 | 1327.68 | 63.97 | 0.0002   | RAEAAALGNAAADAK         |
| 216 | gi 189515773 | PREDICTED: amylo-1, 6-glucosidase, 4-alpha-glucanotr:    | 49.9 | 1532 | 894.83  | 1787.64 | 1787.00 | 63.95 | 0.00016  | GLPALIQDHPHLHAIR        |
| 217 | gi 189536606 | PREDICTED: id:ibd5057 [Danio rerio]                      | 50.6 | 1830 | 418.88  | 835.75  | 837.47  | 57.52 | 0.0011   | VVAAPPER                |
|     |              |                                                          |      |      | 1051.37 | 3151.07 | 3149.88 | 40.31 | 0.017    | TASEKPPKPLEKPKPALEKPLK  |
| 218 | gi 41054571  | citrate synthase [Danio rerio]                           | 29.1 | 468  | 550.50  | 1098.99 | 1097.53 | 33.89 | 0.25     | HLPNDPMFK               |
|     |              |                                                          |      |      | 881.85  | 1761.69 | 1761.88 | 63.55 | 0.00018  | GLVYETSVLDPDEGIR        |
| 219 | gi 54400426  | ATP synthase, H+ transporting, mitochondrial F0 comple:  | 68.3 | 252  | 764.44  | 1526.87 | 1526.78 | 52.48 | 0.0025   | LDYQVELQNLHR            |
| 220 | gi 125828659 | PREDICTED: hypothetical protein LOC449551 [Danio rerio]  | 84.1 | 126  | 1270.39 | 2538.76 | 2538.31 | 62.53 | 0.00014  | LVVNDGPDGGQSVYHIHIVLGR  |
| 221 | gi 189527793 | PREDICTED: wu:fb05a01 [Danio rerio]                      | 39.5 | 6009 | 579.12  | 1156.23 | 1155.65 | 54.20 | 0.0021   | LKGDVDVSVPK             |
|     |              |                                                          |      |      | 651.60  | 1301.18 | 1299.69 | 35.67 | 0.13     | LMGSNVDLNLPK            |
| 222 | gi 32401408  | annexin A11b [Danio rerio]                               | 29.5 | 485  | 822.76  | 1643.51 | 1642.75 | 58.18 | 0.00061  | SLYTHISGDTSGDYK         |
|     |              |                                                          |      |      | 886.82  | 1771.62 | 1770.84 | 42.54 | 0.022    | SLYTHISGDTSGDYKK        |
| 223 | gi 50344950  | hypothetical protein LOC415237 [Danio rerio]             | 74.6 | 118  | 859.19  | 1716.36 | 1715.99 | 61.34 | 0.0003   | ILVLFYPLEPSQIGK         |
| 224 | gi 51010975  | hypothetical protein LOC445053 [Danio rerio]             | 26.5 | 204  | 853.72  | 1705.42 | 1704.91 | 61.21 | 0.00033  | GATYGKPVHHGVNQIK        |
| 225 | gi 61806580  | hypothetical protein LOC541378 [Danio rerio]             | 65.2 | 448  | 780.37  | 1558.73 | 1557.89 | 48.92 | 0.0056   | LLEVIDGHIPLPSR          |
|     |              |                                                          |      |      | 920.26  | 1838.50 | 1836.96 | 44.61 | 0.013    | DKPHLNIGTIGHVDHGK       |
| 226 | gi 41055823  | hypothetical protein LOC393488 [Danio rerio]             | 75.3 | 186  | 968.51  | 967.50  | 966.55  | 60.55 | 0.00047  | HVLATLGEK               |
| 227 | gi 50540186  | hypothetical protein LOC436833 [Danio rerio]             | 35.4 | 229  | 1079.82 | 2157.63 | 2156.16 | 60.52 | 0.00028  | AGLTASEVDELLTLATSQPIK   |
| 228 | gi 54261767  | succinate-CoA ligase, ADP-forming, beta subunit [Danio   | 53.9 | 466  | 1294.16 | 2586.30 | 2585.29 | 50.09 | 0.0023   | LHGGTPANFLDVGGGATAQQV   |
| 229 | gi 125842393 | PREDICTED: zgc:103738 [Danio rerio]                      | 40.3 | 77   | 987.76  | 2960.25 | 2961.35 | 52.44 | 0.0011   | TLSAGSHAEHEGKPYCNNPCYF  |
| 230 | gi 56693257  | hypothetical protein LOC494050 [Danio rerio]             | 55.4 | 368  | 1035.13 | 3102.35 | 3100.58 | 51.88 | 0.0013   | ILLDQQQEHTVETPHGVLHVTVF |
| 231 | gi 41152175  | ribosomal protein S7 [Danio rerio]                       | 53.6 | 194  | 733.47  | 1464.93 | 1464.94 | 60.08 | 0.00044  | KAIIFVVPVQLK            |
| 232 | gi 116487349 | carboxylesterase 2-like [Danio rerio]                    | 53.3 | 555  | 806.67  | 2416.99 | 2415.27 | 57.57 | 0.00048  | GSPAVVEQYLGIPFAQPPVGPH  |
| 233 | gi 125843378 | PREDICTED: si:dkey-38112.3 [Danio rerio]                 | 53.4 | 549  | 806.67  | 2416.99 | 2415.27 | 57.57 | 0.00048  | GSPAVVEQYLGIPFAQPPVGPH  |
| 234 | gi 40363541  | S-adenosylhomocysteine hydrolase [Danio rerio]           | 44.1 | 433  | 480.61  | 1438.81 | 1437.75 | 58.91 | 0.00057  | KLDEEVAAHLDK            |
| 235 | gi 189520524 | PREDICTED: similar to Troponin T2, cardiac [Danio rerio] | 31.7 | 243  | 509.03  | 1016.05 | 1015.47 | 58.74 | 0.00085  | VDFDDIHR                |
| 236 | gi 31377814  | troponin T1, skeletal, slow [Danio rerio]                | 25.2 | 290  | 509.03  | 1016.05 | 1015.47 | 58.74 | 0.00085  | VDFDDLHR                |
| 237 | gi 189517959 | PREDICTED: hypothetical protein LOC556703 [Danio rerio]  | 23.7 | 249  | 509.03  | 1016.05 | 1015.47 | 58.74 | 0.00085  | VDFDDIHR                |
| 238 | gi 68357880  | PREDICTED: similar to slow troponin T 1 [Danio rerio]    | 7.8  | 268  | 509.03  | 1016.05 | 1015.47 | 58.74 | 0.00085  | VDFDDIHR                |
| 239 | gi 50539832  | lysyl-tRNA synthetase [Danio rerio]                      | 29.9 | 602  | 1124.52 | 2247.02 | 2247.14 | 58.56 | 0.00042  | YNHLQPGDHLTDVVLNLSSGR   |
| 240 | gi 41056209  | hypothetical protein LOC393532 [Danio rerio]             | 51.6 | 490  | 1012.59 | 2023.16 | 2022.00 | 56.97 | 0.00068  | HILDTHGLDPHQATASGPR     |
| 241 | gi 189517274 | PREDICTED: hypothetical protein [Danio rerio]            | 42.3 | 797  | 602.46  | 1202.91 | 1201.66 | 47.02 | 0.011    | MRNLTEGILR              |
| 242 | gi 47550715  | heterogeneous nuclear ribonucleoprotein A0 [Danio rerio] | 43.9 | 314  | 843.62  | 1685.23 | 1683.72 | 57.64 | 0.00071  | GFGFVHFEDNDSADK         |
| 243 | gi 189540123 | PREDICTED: similar to Filamin-C (Gamma-filamin) (Filar   | 61.2 | 2702 | 1277.89 | 2553.77 | 2553.25 | 56.45 | 0.00055  | FNNEHIPDSPFIVPVATLSSDAR |
| 244 | gi 68379126  | PREDICTED: hypothetical protein LOC767664 [Danio rerio]  | 38.3 | 81   | 1494.55 | 1493.54 | 1493.82 | 45.21 | 0.014    | IFLEDNGLPVHIK           |
|     |              |                                                          |      |      | 1494.87 | 1493.86 | 1493.82 | 50.07 | 0.0042   | IFLEDNGLPVHIK           |
| 245 | gi 41053611  | hypothetical protein LOC393828 [Danio rerio]             | 73.2 | 213  | 1200.94 | 2399.87 | 2399.16 | 56.18 | 0.00068  | SYHSPWEEAIINDPTLADTLK   |
| 246 | gi 47085891  | cytochrome b5 [Danio rerio]                              | 38   | 137  | 1090.16 | 2178.31 | 2177.91 | 56.12 | 0.00073  | EQAGGDATESFEDVGHSTDAR   |
| 247 | gi 189540214 | PREDICTED: similar to myosin heavy chain, partial [Danio | 45.5 | 809  | 1489.81 | 1488.80 | 1488.74 | 50.47 | 0.0042   | ENQSVLITGESGAGK         |
| 248 | gi 189540222 | PREDICTED: similar to myosin, heavy polypeptide 2, fas:  | 42.1 | 950  | 1489.81 | 1488.80 | 1488.74 | 50.47 | 0.0042   | ENQSVLITGESGAGK         |

|     |              |                                                              |      |      |         |         |         |       |         |                          |
|-----|--------------|--------------------------------------------------------------|------|------|---------|---------|---------|-------|---------|--------------------------|
| 249 | gi 156616344 | hypothetical protein LOC100124599 [Danio rerio]              | 71.2 | 278  | 1489.81 | 1488.80 | 1488.74 | 50.47 | 0.0042  | ENQSVLITGESGAGK          |
| 250 | gi 41053746  | RNA binding protein with multiple splicing 2 [Danio rerio]   | 33.5 | 200  | 772.69  | 1543.36 | 1542.88 | 56.08 | 0.0011  | TLFVSGGLPTDIKPR          |
| 251 | gi 90093334  | hypothetical protein LOC563679 [Danio rerio]                 | 63   | 805  | 905.89  | 1809.76 | 1809.99 | 55.96 | 0.00096 | NAPAIIFIDELDAIAPK        |
| 252 | gi 56790313  | homeo box B9a [Danio rerio]                                  | 50.6 | 255  | 710.16  | 1418.30 | 1416.74 | 55.87 | 0.0013  | MEPLLGHLEPPK             |
| 253 | gi 44917595  | alcohol dehydrogenase 8b [Danio rerio]                       | 88.6 | 376  | 966.09  | 2895.25 | 2894.48 | 55.82 | 0.00051 | GFPTILGHEAAGVVESVGPVTL   |
| 254 | gi 168229182 | zgc:171912 [Danio rerio]                                     | 56   | 459  | 562.97  | 1123.92 | 1123.61 | 48.49 | 0.0073  | IIEKNAGHSR               |
| 255 | gi 47085971  | eukaryotic translation initiation factor 5A [Danio rerio]    | 61.9 | 155  | 678.36  | 1354.70 | 1354.76 | 55.66 | 0.0012  | VHLVGIDIFTNK             |
| 256 | gi 21426835  | glucose phosphate isomerase a [Danio rerio]                  | 44.7 | 553  | 1127.20 | 3378.58 | 3376.65 | 55.39 | 0.00044 | VNYHTGPVWGEPTNGQHAFV     |
| 257 | gi 90652819  | hypothetical protein LOC664756 [Danio rerio]                 | 53.7 | 462  | 972.67  | 2914.99 | 2915.57 | 39.60 | 0.023   | EGGANGVTLLLEALDSILPPSRPT |
| 258 | gi 41152375  | mitochondrial ATP synthase gamma-subunit [Danio rerio]       | 54.5 | 292  | 1097.58 | 1096.57 | 1095.60 | 55.25 | 0.0015  | HLIIGVSSDR               |
| 259 | gi 160333682 | heat shock protein 8 [Danio rerio]                           | 45.9 | 649  | 562.34  | 1122.67 | 1122.53 | 35.62 | 0.14    | YKAEDDVQR                |
|     |              |                                                              |      |      | 887.36  | 1772.70 | 1772.81 | 39.80 | 0.043   | NQTAEREFEHQK             |
|     |              |                                                              |      |      | 1131.27 | 2260.52 | 2259.14 | 47.51 | 0.0053  | SINPDEAVAYGAAVQAAILSGDK  |
| 260 | gi 41055654  | hypothetical protein LOC393165 isoform 2 [Danio rerio]       | 81.5 | 628  | 537.56  | 1073.11 | 1074.49 | 34.53 | 0.22    | DQDESVVQR                |
|     |              |                                                              |      |      | 1079.28 | 2156.54 | 2155.09 | 56.88 | 0.00064 | ILAQITGTENDQAQESRPGK     |
| 261 | gi 47086649  | F-actin capping protein alpha-1 subunit [Danio rerio]        | 47.6 | 286  | 717.26  | 2148.76 | 2147.02 | 54.51 | 0.0011  | LDGSEDQVLITEHGDLDHGR     |
| 262 | gi 50539806  | hypothetical protein LOC436642 [Danio rerio]                 | 54.2 | 323  | 976.35  | 1950.69 | 1950.01 | 53.72 | 0.0014  | ALESAYGSEKPSLTSAAIR      |
| 263 | gi 189518755 | PREDICTED: similar to malic enzyme 2, NAD(+)-depend          | 65.4 | 581  | 1093.78 | 2185.54 | 2184.23 | 53.23 | 0.0015  | SFLDAVNVIKPTAIIIGVSGAGR  |
| 264 | gi 57525624  | malic enzyme 2, NAD(+)-dependent, mitochondrial [Danio       | 62   | 581  | 1093.78 | 2185.54 | 2184.23 | 53.23 | 0.0015  | SFLDAVNVIKPTAIIIGVSGAGR  |
| 265 | gi 38488700  | phosphoglycerate mutase 1 [Danio rerio]                      | 42.5 | 254  | 835.62  | 1669.22 | 1668.89 | 52.44 | 0.0023  | ALPFWNDEIVPQIK           |
| 266 | gi 55926092  | heat shock 10kD protein 1 (chaperonin 10) [Danio rerio]      | 65   | 100  | 770.78  | 1539.54 | 1539.86 | 52.40 | 0.0024  | VLQATVVAVGPGSTNK         |
| 267 | gi 52218912  | enoyl Coenzyme A hydratase, short chain, 1, mitochondr       | 54.3 | 291  | 1056.69 | 2111.36 | 2110.12 | 52.29 | 0.0019  | AQFGQPEILLGTIPGAGGTQR    |
| 268 | gi 30410758  | keratin 18 [Danio rerio]                                     | 54.3 | 431  | 1000.00 | 1997.99 | 1998.02 | 51.86 | 0.0022  | GNIQHQTQEYEALLNIK        |
| 269 | gi 18858281  | apolipoprotein A-I [Danio rerio]                             | 40.1 | 262  | 912.77  | 1823.53 | 1821.93 | 50.61 | 0.0032  | EKLEPVFQEYSALNR          |
| 270 | gi 51011113  | hydroxyacyl-Coenzyme A dehydrogenase [Danio rerio]           | 70.6 | 309  | 923.36  | 2767.06 | 2767.42 | 51.37 | 0.0017  | NVSTSTDAASVVHGTDLVVEAIV  |
| 271 | gi 47271398  | ribosomal protein L7 [Danio rerio]                           | 41.5 | 246  | 680.91  | 1359.81 | 1359.62 | 51.36 | 0.0036  | TTHFVEGGDAGNR            |
| 272 | gi 41055997  | hypothetical protein LOC393098 [Danio rerio]                 | 54.5 | 343  | 863.60  | 1725.19 | 1724.92 | 50.74 | 0.0034  | DSTVLAHVMMKLLNER         |
| 273 | gi 18858981  | lamin b2 [Danio rerio]                                       | 49.7 | 583  | 545.21  | 1088.41 | 1087.55 | 50.59 | 0.0054  | KLLEGEEDR                |
| 274 | gi 125849603 | PREDICTED: similar to keratin 8 [Danio rerio]                | 31.3 | 438  | 545.21  | 1088.41 | 1087.55 | 50.59 | 0.0054  | KLLEGEEDR                |
| 275 | gi 189523135 | PREDICTED: similar to type II keratin E1 [Danio rerio]       | 48.2 | 311  | 545.21  | 1088.41 | 1087.55 | 50.59 | 0.0054  | KLLEGEEDR                |
| 276 | gi 157743314 | NADH dehydrogenase (ubiquinone) 1 beta subcomplex 5          | 28.5 | 186  | 866.17  | 1730.33 | 1729.87 | 50.53 | 0.0035  | EKGDGPWFQIPTIDK          |
| 277 | gi 148229906 | hypothetical protein LOC100037332 [Danio rerio]              | 30.1 | 302  | 550.67  | 1099.32 | 1098.64 | 50.39 | 0.0056  | LKQELAE LR               |
| 278 | gi 68448495  | hypothetical protein LOC100003906 isoform 1 [Danio rerio]    | 47.3 | 915  | 1373.97 | 4118.89 | 4117.98 | 50.23 | 0.00095 | SGTPGFSSHHTTNSGQPGLH/    |
| 279 | gi 37497110  | ribophorin I [Danio rerio]                                   | 34.4 | 598  | 813.09  | 2436.23 | 2435.30 | 50.20 | 0.0024  | VETVFSHVLKPFPTHITQAER    |
| 280 | gi 189516116 | PREDICTED: similar to ribophorin I [Danio rerio]             | 21.6 | 505  | 813.09  | 2436.23 | 2435.30 | 50.20 | 0.0024  | VETVFSHVLKPFPTHITQAER    |
| 281 | gi 62955727  | NADH dehydrogenase (ubiquinone) 1 beta subcomplex, 1         | 22.9 | 175  | 814.41  | 1626.81 | 1625.79 | 50.13 | 0.0041  | EVQQLQSETPADGPK          |
| 282 | gi 189514551 | PREDICTED: sorbin and SH3 domain containing 2a [Danio rerio] | 40.8 | 2115 | 1419.69 | 2837.37 | 2835.44 | 49.72 | 0.0023  | GAFTPSPLDPASTSDSHIASLSIK |
| 283 | gi 50539996  | peroxiredoxin 2 [Danio rerio]                                | 67   | 197  | 1318.69 | 2635.36 | 2634.36 | 36.61 | 0.051   | IGVELIAASTDSHFSLAWINTPF  |
| 284 | gi 189522138 | PREDICTED: similar to paxillin [Danio rerio]                 | 38.3 | 527  | 1147.86 | 2293.70 | 2294.99 | 42.47 | 0.016   | TWHPEHFVCTHCQEEIGSR      |
| 285 | gi 41055688  | diaphorase (NADH) (cytochrome b-5 reductase) [Danio rerio]   | 77   | 304  | 842.95  | 1683.88 | 1683.90 | 49.44 | 0.0046  | DILLKDELEEIQAR           |
| 286 | gi 189517210 | PREDICTED: similar to ATP-binding cassette, sub-family       | 47.5 | 1518 | 551.55  | 1101.08 | 1099.59 | 49.30 | 0.0077  | IIEAAEGER                |
| 287 | gi 162138946 | hypothetical protein LOC562705 [Danio rerio]                 | 48.5 | 307  | 549.17  | 1096.33 | 1094.59 | 49.23 | 0.0062  | KYGSVTVWR                |
| 288 | gi 125854185 | PREDICTED: hypothetical protein [Danio rerio]                | 24.3 | 645  | 673.68  | 1345.35 | 1346.62 | 48.11 | 0.0079  | EEEEEQLKADK              |
| 289 | gi 189528839 | PREDICTED: similar to LOC567732 protein [Danio rerio]        | 46.6 | 1442 | 988.87  | 2963.58 | 2964.31 | 50.87 | 0.0017  | VFSSDGSSTVTVQSAGDSHHFL   |
| 290 | gi 189528837 | PREDICTED: similar to LOC567732 protein [Danio rerio]        | 47.4 | 1157 | 988.87  | 2963.58 | 2964.31 | 50.87 | 0.0017  | VFSSDGSSTVTVQSAGDSHHFL   |
| 291 | gi 68354684  | PREDICTED: coiled-coil domain containing 47 [Danio rerio]    | 55.7 | 492  | 851.10  | 1700.18 | 1698.86 | 45.80 | 0.01    | IQRPPEDSIQPYEK           |
| 292 | gi 30231250  | cholinergic receptor, muscarinic 2 [Danio rerio]             | 34.5 | 495  | 418.31  | 417.30  | 418.22  | 37.37 | 0.0012  | AGGSK                    |
| 293 | gi 50345068  | dehydrogenase/reductase (SDR family) member 1 [Danio rerio]  | 69.4 | 310  | 909.43  | 1816.84 | 1815.86 | 47.68 | 0.0063  | YKDVFTNGETTELSGR         |
| 294 | gi 56118753  | troponin C, slow [Danio rerio]                               | 36   | 161  | 602.40  | 1202.78 | 1202.58 | 47.42 | 0.0099  | AAAEQLTDEQK              |
| 295 | gi 57222259  | talin 1 [Danio rerio]                                        | 53   | 2538 | 1059.58 | 3175.71 | 3174.57 | 47.34 | 0.0035  | EAVDDLSTLAEVASAAGAVGC    |
| 296 | gi 47086623  | monocarboxylate transporter 4 [Danio rerio]                  | 56.7 | 508  | 946.72  | 1891.42 | 1889.91 | 47.08 | 0.0069  | ELESIEVDSIEVENASK        |
| 297 | gi 125814831 | PREDICTED: similar to zinc finger protein 585B [Danio rerio] | 64.1 | 298  | 838.32  | 1674.63 | 1672.88 | 46.69 | 0.009   | EESEDVKIEEIIK            |

|     |              |                                                            |      |      |         |         |         |       |        |                          |
|-----|--------------|------------------------------------------------------------|------|------|---------|---------|---------|-------|--------|--------------------------|
| 298 | gi 189530311 | PREDICTED: hypothetical LOC555629 [Danio rerio]            | 61.6 | 401  | 796.88  | 1591.74 | 1591.82 | 46.57 | 0.0093 | QKMSLLSSNTEINK           |
| 299 | gi 189524989 | PREDICTED: neurobeachin-like 2 [Danio rerio]               | 48   | 1495 | 596.25  | 1190.48 | 1188.58 | 45.64 | 0.015  | GSYAIEIHDGK              |
| 300 | gi 189533816 | PREDICTED: hypothetical protein [Danio rerio]              | 41.2 | 1020 | 493.60  | 985.18  | 983.60  | 45.55 | 0.018  | QLIEQLLK                 |
| 301 | gi 189523776 | PREDICTED: hypothetical protein LOC798920 isoform 1        | 83.4 | 265  | 685.11  | 1368.20 | 1367.61 | 45.43 | 0.013  | TRMYNTQDDPK              |
| 302 | gi 48597012  | ribosomal protein L23a [Danio rerio]                       | 25.2 | 155  | 621.67  | 1241.33 | 1240.68 | 45.28 | 0.014  | VNTLIRPDGK               |
| 303 | gi 189522914 | PREDICTED: similar to RAS and EF-hand domain contai        | 49.2 | 551  | 506.72  | 1011.42 | 1012.59 | 45.19 | 0.016  | IVLAGDAAVGK              |
| 304 | gi 189525785 | PREDICTED: similar to AT rich interactive domain 5B (M     | 51.6 | 935  | 673.32  | 1344.62 | 1344.72 | 45.14 | 0.015  | KQEGSVQESI               |
| 305 | gi 189532951 | PREDICTED: hypothetical protein [Danio rerio]              | 29.3 | 570  | 1001.67 | 2001.32 | 2000.01 | 44.93 | 0.011  | YVIDTSDVVTNYKELNK        |
| 306 | gi 41152024  | glycoprotein, synaptic 2 [Danio rerio]                     | 31.2 | 308  | 608.63  | 1215.25 | 1215.61 | 44.90 | 0.018  | HYEVEILDAK               |
| 307 | gi 189523571 | PREDICTED: similar to mcf.2 transforming sequence-like     | 53.3 | 929  | 889.20  | 1776.39 | 1774.95 | 44.83 | 0.014  | ESSPLFAADVITELKR         |
| 308 | gi 125806044 | PREDICTED: similar to 19.9kD myosin light chain [Danio     | 28.3 | 173  | 669.26  | 2004.76 | 2002.97 | 42.20 | 0.02   | DGFIDKEDLHDMLASLGK       |
| 309 | gi 47550703  | myosin, light polypeptide 9, like [Danio rerio]            | 45.9 | 172  | 669.26  | 2004.76 | 2002.97 | 42.20 | 0.02   | DGFIDKEDLHDMLASLGK       |
| 310 | gi 125850307 | PREDICTED: CFH protein [Danio rerio]                       | 72   | 751  | 1101.66 | 2201.30 | 2200.96 | 44.39 | 0.011  | DDITYENVEPVSEASYADGK     |
| 311 | gi 189528635 | PREDICTED: similar to odorant receptor [Danio rerio]       | 50.5 | 305  | 797.72  | 1593.43 | 1591.89 | 44.35 | 0.016  | LLTDLLSDTHLVPR           |
| 312 | gi 47086899  | par-6 partitioning defective 6-like protein gamma [Danio r | 6    | 434  | 442.43  | 882.85  | 882.51  | 42.80 | 0.026  | LIMTIHR                  |
| 313 | gi 125843259 | PREDICTED: polymerase (RNA) III (DNA directed) polyp       | 55.9 | 1130 | 585.65  | 1169.29 | 1169.70 | 44.34 | 0.02   | VILIQEQLSK               |
| 314 | gi 45387877  | par-3 partitioning defective 3 homolog [Danio rerio]       | 40.3 | 1127 | 470.48  | 1408.42 | 1408.67 | 44.24 | 0.017  | TLSPSPDDHERR             |
| 315 | gi 189526852 | PREDICTED: similar to G2/M-phase specific E3 ubiquitin     | 41.9 | 762  | 898.52  | 1795.02 | 1794.80 | 44.16 | 0.014  | SNMEFAINNTHGFGKE         |
| 316 | gi 189519924 | PREDICTED: similar to Uncharacterized protein KIAA046      | 40.1 | 2775 | 664.74  | 1991.18 | 1992.00 | 44.09 | 0.013  | VGEDSMSGDPLSKLPVPHK      |
| 317 | gi 189519630 | PREDICTED: similar to centrosomal protein 110kDa [Dar      | 38   | 1959 | 551.48  | 1100.95 | 1099.62 | 43.75 | 0.027  | LEIAEKELR                |
| 318 | gi 125815320 | PREDICTED: similar to Cystine/glutamate transporter (Ar    | 52.4 | 492  | 476.65  | 951.28  | 952.38  | 43.97 | 0.022  | VCTDGGSEK                |
| 319 | gi 189529618 | PREDICTED: similar to Glutamate [NMDA] receptor subu       | 36.7 | 1924 | 418.31  | 417.30  | 418.22  | 37.37 | 0.0012 | AGGSK                    |
|     |              |                                                            |      |      | 501.48  | 500.47  | 501.28  | 31.42 | 0.096  | RGGGR                    |
| 320 | gi 122114635 | hypothetical protein LOC613021 [Danio rerio]               | 36.4 | 1176 | 418.31  | 417.30  | 418.22  | 37.37 | 0.0012 | AGGSK                    |
| 321 | gi 55926060  | seven in absentia 2-like [Danio rerio]                     | 39   | 331  | 418.31  | 417.30  | 418.22  | 37.37 | 0.0012 | AGGSK                    |
| 322 | gi 47086263  | phosphoglucomutase 2 [Danio rerio]                         | 45.8 | 611  | 522.11  | 1042.20 | 1043.57 | 43.80 | 0.025  | ELNRNTAVK                |
| 323 | gi 123708080 | hypothetical protein LOC791153 [Danio rerio]               | 38.8 | 304  | 916.46  | 915.45  | 914.55  | 43.74 | 0.028  | IVATAKAGGK               |
|     |              |                                                            |      |      | 566.56  | 1131.11 | 1129.61 | 35.10 | 0.18   | GEELSAAAVKR              |
| 324 | gi 47086477  | ribosomal protein L13a [Danio rerio]                       | 20   | 205  | 634.75  | 1267.49 | 1265.65 | 43.73 | 0.02   | YQAITATLEEK              |
| 325 | gi 121583897 | hypothetical protein LOC562692 [Danio rerio]               | 24.5 | 384  | 816.81  | 1631.60 | 1631.81 | 43.59 | 0.019  | ELEEKVAMLEAENK           |
| 326 | gi 52218992  | hypothetical protein LOC447834 [Danio rerio]               | 60.1 | 248  | 662.36  | 1322.70 | 1321.71 | 43.45 | 0.021  | TLLGGGGVDGAIHR           |
| 327 | gi 68435369  | PREDICTED: similar to Histone H1.5 (H1 VAR.5) (H1b) [      | 53.9 | 206  | 512.62  | 1023.22 | 1022.62 | 43.39 | 0.025  | HGVSLAALKK               |
| 328 | gi 113679269 | hypothetical protein LOC751661 [Danio rerio]               | 39.6 | 202  | 512.62  | 1023.22 | 1022.62 | 43.39 | 0.025  | HGVSLAALKK               |
| 329 | gi 189541652 | PREDICTED: similar to Myosin-3 (Myosin heavy chain 3)      | 30.8 | 882  | 659.27  | 1316.53 | 1315.65 | 43.35 | 0.024  | ELELELDAEQK              |
| 330 | gi 189530862 | PREDICTED: wu:fb54a03 [Danio rerio]                        | 32.7 | 727  | 401.07  | 800.12  | 800.46  | 43.33 | 0.032  | ELEGLLK                  |
| 331 | gi 125848202 | PREDICTED: similar to arachidonate lipoxygenase 3 [Da      | 29.5 | 722  | 635.12  | 1268.23 | 1267.71 | 39.82 | 0.05   | LADLPTQVINGK             |
| 332 | gi 18859107  | non-metastatic cells 2, protein (NM23B) expressed in [Da   | 57.5 | 153  | 1088.81 | 3263.40 | 3261.62 | 48.41 | 0.0024 | NIIHGSDSVDSANTEISLWFKPEI |
| 333 | gi 189529038 | PREDICTED: similar to Insulin receptor substrate 1-B (IR   | 45.4 | 1136 | 418.17  | 834.32  | 833.40  | 42.96 | 0.036  | ELSCPGTK                 |
| 334 | gi 189531190 | PREDICTED: im:7145859 isoform 1 [Danio rerio]              | 33.2 | 677  | 1052.47 | 2102.92 | 2102.03 | 42.90 | 0.017  | EVDEVDAALSDLEITLEGGK     |
| 335 | gi 189528657 | PREDICTED: hypothetical protein LOC503600 [Danio rei       | 44.7 | 1677 | 472.54  | 943.07  | 942.49  | 42.73 | 0.034  | HELIEFR                  |
| 336 | gi 53292609  | clathrin, heavy polypeptide a (Hc) [Danio rerio]           | 47.4 | 1680 | 472.54  | 943.07  | 942.49  | 42.73 | 0.034  | HELIEFR                  |
| 337 | gi 121583924 | hypothetical protein LOC335781 [Danio rerio]               | 48.3 | 147  | 552.33  | 1102.64 | 1102.65 | 42.54 | 0.034  | FIAVAVSALGR              |
| 338 | gi 55925317  | hypothetical protein LOC492525 [Danio rerio]               | 33.7 | 398  | 530.65  | 1059.29 | 1059.57 | 42.47 | 0.037  | EKNNSLSLR                |
| 339 | gi 123702724 | hypothetical protein LOC791201 [Danio rerio]               | 50   | 440  | 737.77  | 1473.52 | 1472.75 | 39.98 | 0.046  | QDLELQMENLLK             |
| 340 | gi 189531406 | PREDICTED: similar to nicotinamide nucleotide transhyd     | 49.2 | 679  | 552.60  | 1103.19 | 1102.64 | 42.41 | 0.035  | YKDVVVGVPK               |
| 341 | gi 41055969  | hypothetical protein LOC393494 [Danio rerio]               | 35.2 | 244  | 472.13  | 942.24  | 943.42  | 42.38 | 0.034  | QDVDGDAPK                |
| 342 | gi 41055708  | proteasome (prosome, macropain) 26S subunit, non-ATF       | 43.3 | 503  | 1294.90 | 2587.79 | 2586.35 | 42.35 | 0.014  | EFLLGFLQEPVEIEGDVPFRPR   |
| 343 | gi 131888959 | hypothetical protein LOC100034538 [Danio rerio]            | 18.1 | 448  | 709.08  | 1416.14 | 1415.74 | 42.27 | 0.029  | EALGAENIQSTKR            |
| 344 | gi 60279665  | protocadherin 15b [Danio rerio]                            | 36.4 | 1907 | 401.07  | 800.12  | 799.52  | 41.99 | 0.043  | ELKGILK                  |
| 345 | gi 189521167 | PREDICTED: MAP/microtubule affinity-regulating kinase      | 49.8 | 739  | 551.27  | 1100.52 | 1100.67 | 41.68 | 0.043  | FLILNPTKR                |
| 346 | gi 55742450  | coiled-coil domain containing 80 [Danio rerio]             | 24.7 | 867  | 551.27  | 1100.52 | 1099.59 | 41.66 | 0.043  | EEEIVPTKR                |
| 347 | gi 189518076 | PREDICTED: filamin C, gamma b (actin binding protein 2     | 44.8 | 2732 | 1277.89 | 2553.77 | 2554.23 | 37.76 | 0.041  | FNDEHIPDSPFIVPIASLSDDAR  |

|     |              |                                                               |      |      |         |         |         |       |       |                       |
|-----|--------------|---------------------------------------------------------------|------|------|---------|---------|---------|-------|-------|-----------------------|
| 348 | gi 39752649  | kelch repeat and BTB (POZ) domain containing 10 [Danio rerio] | 37   | 605  | 544.27  | 543.26  | 543.31  | 41.53 | 0.022 | LNAAR                 |
| 349 | gi 28201964  | erythrocyte membrane protein band 4.1 (elliptocytosis 1,)     | 33.5 | 1534 | 583.60  | 1165.19 | 1164.71 | 41.44 | 0.036 | IELVLPEKPK            |
| 350 | gi 157073897 | ubiquinol-cytochrome c reductase, Rieske iron-sulfur poly     | 42.1 | 273  | 1132.71 | 2263.40 | 2263.11 | 41.41 | 0.021 | EIETEAGVNLAE LRDPQHDK |
| 351 | gi 189530012 | PREDICTED: wu:fb94b04 [Danio rerio]                           | 43.8 | 762  | 550.32  | 1098.62 | 1098.61 | 41.37 | 0.044 | KLNEAQQLR             |
| 352 | gi 56693225  | F-box protein 44 [Danio rerio]                                | 54.7 | 276  | 665.84  | 1329.67 | 1330.68 | 36.18 | 0.02  | KEPIDTFQPEK           |

**DMSO replicate 1**

| Protein # | Accession ID | Protein name                           | Protein coverage | length   | peptide m/z     | peptide Mr <sub>expt</sub> | peptide Mr <sub>calc</sub>                        | peptide score | pep_expect | peptide sequence        |         |         |       |        |             |
|-----------|--------------|----------------------------------------|------------------|----------|-----------------|----------------------------|---------------------------------------------------|---------------|------------|-------------------------|---------|---------|-------|--------|-------------|
| 1         | gi 74315904  | alpha globin-like [Danio rerio]        | 72               | 143      | 559.16          | 1116.30                    | 1114.56                                           | 62.82         | 0.00064    | ADEIGAEALAR             |         |         |       |        |             |
|           |              |                                        |                  |          | 590.05          | 1178.09                    | 1175.62                                           | 81.86         | 7.00E-06   | TIMGAVGEAISK            |         |         |       |        |             |
|           |              |                                        |                  |          | 684.20          | 1366.38                    | 1365.73                                           | 83.43         | 4.40E-06   | FFNNLALALSEK            |         |         |       |        |             |
|           |              |                                        |                  |          | 932.40          | 1862.78                    | 1863.88                                           | 123.63        | 3.90E-10   | TYFSHWSDLSPGSGPVK       |         |         |       |        |             |
|           |              |                                        |                  |          | 934.07          | 1866.12                    | 1868.00                                           | 127.17        | 1.70E-10   | IDDLVGGLAALSELHAFK      |         |         |       |        |             |
|           |              |                                        |                  |          | 623.13          | 1866.35                    | 1863.88                                           | 43.57         | 0.039      | TYFSHWSDLSPGSGPVK       |         |         |       |        |             |
|           |              |                                        |                  |          | 934.35          | 1866.68                    | 1868.00                                           | 120.89        | 7.30E-10   | IDDLVGGLAALSELHAFK      |         |         |       |        |             |
|           |              |                                        |                  |          | 996.15          | 1990.29                    | 1991.97                                           | 89.92         | 8.50E-07   | TYFSHWSDLSPGSGPVKK      |         |         |       |        |             |
|           |              |                                        |                  |          | 1009.90         | 3026.67                    | 3025.62                                           | 60.45         | 0.00053    | TIMGAVGEAISKIDDLVGGLAAL |         |         |       |        |             |
|           |              |                                        |                  |          | 559.16          | 1116.30                    | 1114.56                                           | 62.82         | 0.00064    | ADEIGAEALAR             |         |         |       |        |             |
| 2         | gi 47271417  | hemoglobin alpha adult-1 [Danio rerio] | 74.1             | 143      | 582.04          | 1162.06                    | 1161.61                                           | 77.01         | 2.20E-05   | TIMGAVGEAVSK            |         |         |       |        |             |
|           |              |                                        |                  |          | 684.20          | 1366.38                    | 1365.73                                           | 83.43         | 4.40E-06   | FFNNLALALSEK            |         |         |       |        |             |
|           |              |                                        |                  |          | 924.15          | 1846.28                    | 1847.88                                           | 110.05        | 9.00E-09   | TYFSHWADLSPGSGPVK       |         |         |       |        |             |
|           |              |                                        |                  |          | 934.07          | 1866.12                    | 1868.00                                           | 127.17        | 1.70E-10   | IDDLVGGLAALSELHAFK      |         |         |       |        |             |
|           |              |                                        |                  |          | 660.43          | 1978.26                    | 1975.98                                           | 65.55         | 0.00024    | TYFSHWADLSPGSGPVKK      |         |         |       |        |             |
|           |              |                                        |                  |          | 3               | gi 163644263               | ventricular myosin heavy chain-like [Danio rerio] | 58.1          | 1936       | 918.52                  | 917.51  | 917.48  | 44.02 | 0.054  | VTVETQGGK   |
|           |              |                                        |                  |          |                 |                            |                                                   |               |            | 496.07                  | 990.13  | 989.50  | 55.65 | 0.0033 | SNNFQKPR    |
|           |              |                                        |                  |          |                 |                            |                                                   |               |            | 538.17                  | 1074.32 | 1073.54 | 42.91 | 0.063  | ADIAESQVNK  |
|           |              |                                        |                  |          |                 |                            |                                                   |               |            | 554.06                  | 1106.11 | 1104.58 | 44.72 | 0.036  | SNTAAASLDKK |
|           |              |                                        |                  |          |                 |                            |                                                   |               |            | 1182.68                 | 1181.67 | 1179.58 | 42.70 | 0.053  | DFEISQLNSK  |
| 1208.62   | 1207.61      | 1207.55                                | 55.68            | 0.0028   |                 |                            |                                                   |               |            | LQAENDEF SR             |         |         |       |        |             |
| 609.71    | 1217.41      | 1215.63                                | 70.03            | 0.00011  |                 |                            |                                                   |               |            | AGLLGQLEEMR             |         |         |       |        |             |
| 612.98    | 1223.95      | 1223.61                                | 40.18            | 0.093    |                 |                            |                                                   |               |            | TKYETDAIQR              |         |         |       |        |             |
| 619.88    | 1237.74      | 1237.63                                | 49.48            | 0.011    |                 |                            |                                                   |               |            | EADVLQQNPPK             |         |         |       |        |             |
| 623.38    | 1244.75      | 1244.65                                | 82.73            | 6.20E-06 |                 |                            |                                                   |               |            | DIDDLELTLAK             |         |         |       |        |             |
| 646.59    | 1291.16      | 1288.63                                | 51.30            | 0.008    |                 |                            |                                                   |               |            | DSQLQLDDSLR             |         |         |       |        |             |
| 650.14    | 1298.26      | 1297.56                                | 53.69            | 0.0042   |                 |                            |                                                   |               |            | TLEDQMNEYR              |         |         |       |        |             |
| 654.56    | 1307.11      | 1307.64                                | 84.62            | 3.50E-06 |                 |                            |                                                   |               |            | NSFSQQLEDLK             |         |         |       |        |             |
| 661.87    | 1321.73      | 1320.66                                | 42.87            | 0.05     |                 |                            |                                                   |               |            | KLEDECSELKK             |         |         |       |        |             |
| 1368.64   | 1367.63      | 1367.63                                | 66.26            | 0.00022  |                 |                            |                                                   |               |            | LQHELDEAEER             |         |         |       |        |             |
| 687.67    | 1373.32      | 1372.74                                | 51.55            | 0.0072   |                 |                            |                                                   |               |            | KDIDDLELTLAK            |         |         |       |        |             |
| 699.61    | 1397.21      | 1397.75                                | 78.26            | 1.40E-05 | NALLQAELEELR    |                            |                                                   |               |            |                         |         |         |       |        |             |
| 708.42    | 1414.83      | 1414.73                                | 99.72            | 1.10E-07 | LAEQELLDVTER    |                            |                                                   |               |            |                         |         |         |       |        |             |
| 733.10    | 1464.19      | 1463.68                                | 59.68            | 0.001    | LSEKDEEMEQVK    |                            |                                                   |               |            |                         |         |         |       |        |             |
| 738.40    | 1474.78      | 1473.68                                | 90.43            | 9.20E-07 | VEELEEELEAER    |                            |                                                   |               |            |                         |         |         |       |        |             |
| 748.76    | 1495.50      | 1495.73                                | 54.59            | 0.0032   | KLQHELDEAEER    |                            |                                                   |               |            |                         |         |         |       |        |             |
| 751.66    | 1501.31      | 1499.75                                | 102.78           | 5.30E-08 | LQEAEEAVEAVNAK  |                            |                                                   |               |            |                         |         |         |       |        |             |
| 752.63    | 1503.25      | 1502.76                                | 89.35            | 1.20E-06 | ENQSILITGESGAGK |                            |                                                   |               |            |                         |         |         |       |        |             |
| 754.50    | 1506.99      | 1506.60                                | 38.10            | 0.15     | EEQAEADGTEDADK  |                            |                                                   |               |            |                         |         |         |       |        |             |
| 761.65    | 1521.28      | 1520.76                                | 81.03            | 7.70E-06 | AITDAAMMAEELKK  |                            |                                                   |               |            |                         |         |         |       |        |             |
| 770.71    | 1539.41      | 1539.77                                | 76.29            | 2.20E-05 | DYHIFYQILSNK    |                            |                                                   |               |            |                         |         |         |       |        |             |
| 771.84    | 1541.67      | 1541.83                                | 91.51            | 6.90E-07 | IDDEQSIIIQLQK   |                            |                                                   |               |            |                         |         |         |       |        |             |

|                |                                              |      |      |         |         |         |        |          |                         |
|----------------|----------------------------------------------|------|------|---------|---------|---------|--------|----------|-------------------------|
|                |                                              |      |      | 771.90  | 1541.78 | 1542.83 | 96.87  | 2.00E-07 | KLAEQELLDVTER           |
|                |                                              |      |      | 772.38  | 1542.74 | 1541.83 | 64.33  | 0.00037  | IDDEQSIIIQLQK           |
|                |                                              |      |      | 1543.94 | 1542.93 | 1542.83 | 92.72  | 5.40E-07 | KLAEQELLDVTER           |
|                |                                              |      |      | 772.73  | 1543.45 | 1541.83 | 60.07  | 0.00099  | IDDEQSIIIQLQK           |
|                |                                              |      |      | 802.72  | 1603.43 | 1602.78 | 73.98  | 4.00E-05 | SNDDLKENTAIVER          |
|                |                                              |      |      | 806.68  | 1611.34 | 1610.75 | 79.68  | 1.00E-05 | AAEESSEEQANVHLGK        |
|                |                                              |      |      | 810.76  | 1619.50 | 1619.78 | 68.97  | 0.00012  | LSEKDEEMEQVKR           |
|                |                                              |      |      | 817.80  | 1633.58 | 1631.78 | 111.28 | 7.40E-09 | LEEAGGATAAQIEMNK        |
|                |                                              |      |      | 823.93  | 1645.84 | 1645.82 | 111.90 | 6.60E-09 | NLTEEMAALDDIIAK         |
|                |                                              |      |      | 844.34  | 1686.67 | 1684.83 | 55.53  | 0.0028   | LELDDVASSMEHIVK         |
|                |                                              |      |      | 845.48  | 1688.95 | 1688.88 | 92.61  | 5.60E-07 | GQNVQQVNYAIGALSK        |
|                |                                              |      |      | 852.23  | 1702.45 | 1701.82 | 98.48  | 1.30E-07 | LQNEIEDLMVDVER          |
|                |                                              |      |      | 859.76  | 1717.51 | 1717.85 | 103.10 | 4.80E-08 | NEDPLNETVVGLYQK         |
|                |                                              |      |      | 862.60  | 1723.19 | 1721.94 | 82.68  | 5.10E-06 | VQLLHSQNTSLINQK         |
|                |                                              |      |      | 893.74  | 1785.47 | 1786.87 | 131.68 | 6.40E-11 | TIDTLQSALESETHSR        |
|                |                                              |      |      | 896.44  | 1790.86 | 1790.76 | 78.77  | 1.30E-05 | QREEQAEADGTEDADK        |
|                |                                              |      |      | 931.71  | 1861.40 | 1858.88 | 102.14 | 5.50E-08 | LEQQVDDLEGSLEQEK        |
|                |                                              |      |      | 934.34  | 1866.67 | 1867.93 | 130.58 | 7.80E-11 | DLEEATLQHEATAATLR       |
|                |                                              |      |      | 942.98  | 1883.95 | 1884.92 | 100.93 | 7.00E-08 | QADSVaelGEQIDNLQR       |
|                |                                              |      |      | 981.26  | 1960.50 | 1957.98 | 104.58 | 3.00E-08 | ILQEEISDLTEQLGEGGK      |
|                |                                              |      |      | 989.22  | 1976.43 | 1976.89 | 60.09  | 0.00084  | MEGDLNEMEIQLSQANR       |
|                |                                              |      |      | 994.44  | 1986.87 | 1986.97 | 82.62  | 4.70E-06 | LEQQVDDLEGSLEQEKK       |
|                |                                              |      |      | 1044.14 | 2086.27 | 2086.04 | 94.86  | 2.70E-07 | VKLEQQVDDLEGSLEQEK      |
| 4 gj 41053652  | myoglobin [Danio rerio]                      | 74.1 | 147  | 550.57  | 1099.12 | 1098.58 | 99.70  | 1.20E-07 | AGLDAAGQGALR            |
|                |                                              |      |      | 779.82  | 1557.62 | 1557.74 | 87.48  | 1.80E-06 | VMDAVIDDIDGYK           |
|                |                                              |      |      | 1011.43 | 2020.84 | 2020.10 | 84.28  | 3.20E-06 | GDHAALLKPLANTHANIHK     |
|                |                                              |      |      | 1110.88 | 2219.75 | 2219.23 | 113.23 | 3.80E-09 | AKGDHAALLKPLANTHANIHK   |
|                |                                              |      |      | 1127.78 | 2253.55 | 2253.18 | 110.97 | 6.60E-09 | FSGISQDLAGSPAVAAHGATV   |
|                |                                              |      |      | 1192.16 | 2382.31 | 2381.27 | 90.70  | 6.40E-07 | FSGISQDLAGSPAVAAHGATV   |
|                |                                              |      |      | 946.44  | 2836.30 | 2834.54 | 54.67  | 0.0022   | GDHAALLKPLANTHANIHKVALN |
| 5 gj 163644331 | ventricular myosin heavy chain [Danio rerio] | 45.9 | 1938 | 496.07  | 990.13  | 989.50  | 55.65  | 0.0033   | SNNFQKPR                |
|                |                                              |      |      | 538.17  | 1074.32 | 1073.54 | 42.91  | 0.063    | ADIAESQVNK              |
|                |                                              |      |      | 609.71  | 1217.41 | 1215.63 | 70.03  | 0.00011  | AGLLGQLEEMR             |
|                |                                              |      |      | 612.98  | 1223.95 | 1223.61 | 40.18  | 0.093    | TKYETDAIQR              |
|                |                                              |      |      | 623.38  | 1244.75 | 1244.65 | 82.73  | 6.20E-06 | DIDDLELTLAK             |
|                |                                              |      |      | 661.87  | 1321.73 | 1320.66 | 42.87  | 0.05     | KLEDECSELKK             |
|                |                                              |      |      | 1368.64 | 1367.63 | 1367.63 | 66.26  | 0.00022  | IQHELDEAEER             |
|                |                                              |      |      | 687.67  | 1373.32 | 1372.74 | 51.55  | 0.0072   | KDIDDLELTLAK            |
|                |                                              |      |      | 748.76  | 1495.50 | 1495.73 | 54.59  | 0.0032   | KIQHELDEAEER            |
|                |                                              |      |      | 752.63  | 1503.25 | 1502.76 | 89.35  | 1.20E-06 | ENQSILITGESGAGK         |
|                |                                              |      |      | 761.65  | 1521.28 | 1520.76 | 81.03  | 7.70E-06 | AITDAAMMAEELKK          |
|                |                                              |      |      | 817.80  | 1633.58 | 1631.78 | 111.28 | 7.40E-09 | LEEAGGATAAQIEMNK        |
|                |                                              |      |      | 823.93  | 1645.84 | 1645.82 | 111.90 | 6.60E-09 | NLTEEMAALDDIIAK         |
|                |                                              |      |      | 862.60  | 1723.19 | 1721.94 | 82.68  | 5.10E-06 | VQLLHSQNTSLLNQK         |
|                |                                              |      |      | 931.71  | 1861.40 | 1858.88 | 102.14 | 5.50E-08 | LEQQVDDLEGSLEQEK        |
|                |                                              |      |      | 934.34  | 1866.67 | 1867.93 | 130.58 | 7.80E-11 | DLEEATLQHEATAATLR       |
|                |                                              |      |      | 942.98  | 1883.95 | 1884.92 | 100.93 | 7.00E-08 | QADSVaelGEQIDNLQR       |
|                |                                              |      |      | 1959.10 | 1958.09 | 1958.94 | 81.61  | 6.10E-06 | NLQEEISDLTEQLGEGGK      |
|                |                                              |      |      | 989.22  | 1976.43 | 1976.89 | 60.09  | 0.00084  | MEGDLNEMEIQLSQANR       |
|                |                                              |      |      | 994.44  | 1986.87 | 1986.97 | 82.62  | 4.70E-06 | LEQQVDDLEGSLEQEKK       |
|                |                                              |      |      | 1100.79 | 2199.56 | 2199.12 | 117.61 | 1.50E-09 | GTLEDQIIQANPALEAFGNAK   |
|                |                                              |      |      | 1183.60 | 2365.19 | 2366.12 | 87.76  | 1.30E-06 | LQFFNHHMFVLEQEEYK       |

|    |              |                                                                 |      |      |         |         |         |        |          |                          |
|----|--------------|-----------------------------------------------------------------|------|------|---------|---------|---------|--------|----------|--------------------------|
| 6  | gi 18858329  | ba1 globin [Danio rerio]                                        | 72.3 | 148  | 480.10  | 958.19  | 957.56  | 43.70  | 0.054    | TAILGLWGK                |
|    |              |                                                                 |      |      | 713.75  | 1425.48 | 1424.76 | 77.05  | 1.90E-05 | LNIDEIGPQALSR            |
|    |              |                                                                 |      |      | 726.09  | 1450.16 | 1449.69 | 79.72  | 1.00E-05 | NTYAALSVMHSEK            |
|    |              |                                                                 |      |      | 898.71  | 1795.40 | 1794.83 | 122.27 | 5.40E-10 | FGQAGFNADVQEAWQK         |
|    |              |                                                                 |      |      | 993.19  | 1984.36 | 1984.97 | 87.75  | 1.50E-06 | YFATFGNLSPPAAIMGNPK      |
| 7  | gi 116325975 | ATP synthase, H+ transporting, mitochondrial F1 comple:         | 53.9 | 551  | 820.50  | 819.49  | 819.40  | 36.13  | 0.29     | ISEASDAK                 |
|    |              |                                                                 |      |      | 1197.66 | 1196.65 | 1196.64 | 46.09  | 0.024    | VVDALGNPIDGK             |
|    |              |                                                                 |      |      | 644.18  | 1286.34 | 1286.69 | 72.39  | 6.10E-05 | HALIYDDLSK               |
|    |              |                                                                 |      |      | 651.57  | 1301.13 | 1299.74 | 86.66  | 2.30E-06 | TAIAIDIINQK              |
|    |              |                                                                 |      |      | 682.65  | 1363.29 | 1362.69 | 91.50  | 7.00E-07 | TGTAEVSSILEEK            |
|    |              |                                                                 |      |      | 766.40  | 1530.79 | 1530.75 | 121.91 | 6.70E-10 | ILGADTGAELEETGR          |
|    |              |                                                                 |      |      | 1625.03 | 1624.02 | 1623.88 | 75.60  | 2.60E-05 | TGAIVDVPVGEELLGR         |
|    |              |                                                                 |      |      | 1030.06 | 2058.11 | 2059.13 | 80.08  | 8.20E-06 | AFLQHVISQHQDLLAAIR       |
|    |              |                                                                 |      |      | 1054.00 | 2105.98 | 2103.03 | 59.97  | 0.00087  | GMSLNLEPDNVGVVVFVFNPK    |
|    |              |                                                                 |      |      | 1183.48 | 2364.95 | 2364.17 | 140.40 | 7.10E-12 | EVAFAAQFGSDLDAAATQQLNR   |
| 8  | gi 29725603  | myosin, light polypeptide 7, regulatory [Danio rerio]           | 53.5 | 172  | 639.21  | 1276.41 | 1273.67 | 43.69  | 0.046    | LDPNATGVVVK              |
|    |              |                                                                 |      |      | 810.67  | 1619.33 | 1617.83 | 96.66  | 2.10E-07 | LNGTDPEETILAAFK          |
|    |              |                                                                 |      |      | 1046.91 | 2091.80 | 2091.96 | 87.94  | 1.30E-06 | GSSNVFSMFEQSQIQEFK       |
|    |              |                                                                 |      |      | 1292.44 | 2582.87 | 2582.25 | 104.64 | 2.40E-08 | FTAAEVDQAFVAPIDVAGNIDY   |
| 9  | gi 169403947 | glyceraldehyde-3-phosphate dehydrogenase [Danio rerio]          | 67   | 333  | 1385.73 | 1384.72 | 1384.73 | 62.36  | 0.0006   | GASQNIIPASTGAAK          |
|    |              |                                                                 |      |      | 787.81  | 1573.60 | 1571.83 | 72.23  | 6.20E-05 | LVIDGHAIIVYSER           |
|    |              |                                                                 |      |      | 882.67  | 1763.32 | 1762.80 | 80.71  | 8.20E-06 | LVTWYDNEFGYSNR           |
|    |              |                                                                 |      |      | 931.72  | 1861.42 | 1860.94 | 86.98  | 1.80E-06 | SSIFDAGAGIALNDHFVK       |
|    |              |                                                                 |      |      | 1106.31 | 2210.60 | 2210.17 | 52.13  | 0.0049   | LVIDGHAIIVYSERDPANIK     |
|    |              |                                                                 |      |      | 1116.84 | 2231.66 | 2230.08 | 106.14 | 1.90E-08 | WGDAGATYVVESTGVFTTIEK    |
| 10 | gi 189540220 | PREDICTED: hypothetical protein LOC393472 [Danio rerio]         | 39.1 | 1937 | 867.26  | 2598.76 | 2599.37 | 72.63  | 3.90E-05 | VINDNFVIVEGLMSTVHAITATQK |
|    |              |                                                                 |      |      | 538.17  | 1074.32 | 1073.54 | 42.91  | 0.063    | ADIAESQVVK               |
|    |              |                                                                 |      |      | 612.98  | 1223.95 | 1223.61 | 40.18  | 0.093    | TKYETDAIQR               |
|    |              |                                                                 |      |      | 623.38  | 1244.75 | 1244.65 | 82.73  | 6.20E-06 | DIDDLELTLAK              |
|    |              |                                                                 |      |      | 661.87  | 1321.73 | 1320.66 | 42.87  | 0.05     | KLEDECSELKK              |
|    |              |                                                                 |      |      | 687.67  | 1373.32 | 1372.74 | 51.55  | 0.0072   | KDIDDLELTLAK             |
|    |              |                                                                 |      |      | 752.63  | 1503.25 | 1502.76 | 89.35  | 1.20E-06 | ENQSILITGESGAGK          |
|    |              |                                                                 |      |      | 761.65  | 1521.28 | 1520.76 | 81.03  | 7.70E-06 | AITDAAMMAEELKK           |
|    |              |                                                                 |      |      | 817.80  | 1633.58 | 1631.78 | 111.28 | 7.40E-09 | LEEAGGATAAQIEMNK         |
|    |              |                                                                 |      |      | 931.71  | 1861.40 | 1858.88 | 102.14 | 5.50E-08 | LEQQVDDLEGSLEQEK         |
|    |              |                                                                 |      |      | 942.98  | 1883.95 | 1884.92 | 100.93 | 7.00E-08 | QADSVAEELGEQIDNLQR       |
|    |              |                                                                 |      |      | 994.44  | 1986.87 | 1986.97 | 82.62  | 4.70E-06 | LEQQVDDLEGSLEQEKK        |
|    |              |                                                                 |      |      | 1183.60 | 2365.19 | 2366.12 | 87.76  | 1.30E-06 | LQQFFNHMHFVLEQEEYK       |
| 11 | gi 55926111  | cardiac myosin light chain-1 [Danio rerio]                      | 69.9 | 196  | 968.51  | 967.50  | 966.55  | 60.55  | 0.00082  | HVLATLGEK                |
|    |              |                                                                 |      |      | 757.12  | 1512.23 | 1511.69 | 84.28  | 3.50E-06 | DQGTFFDFVEGLR            |
|    |              |                                                                 |      |      | 855.80  | 1709.59 | 1710.82 | 89.24  | 1.10E-06 | AKDQGTFFDFVEGLR          |
|    |              |                                                                 |      |      | 889.86  | 1777.70 | 1777.85 | 80.93  | 8.20E-06 | SVPLDFSPDQIEEFR          |
|    |              |                                                                 |      |      | 972.94  | 1943.87 | 1944.08 | 94.30  | 3.10E-07 | ALGHNPTNADVLTVLGKPK      |
|    |              |                                                                 |      |      | 791.08  | 2370.22 | 2370.23 | 69.50  | 8.90E-05 | KEEAPAPVPVETPKEPEVDLK    |
| 12 | gi 50512294  | myosin, heavy polypeptide 2, fast muscle specific [Danio rerio] | 49.2 | 1935 | 538.17  | 1074.32 | 1073.54 | 42.91  | 0.063    | ADIAESQVVK               |
|    |              |                                                                 |      |      | 612.98  | 1223.95 | 1223.61 | 40.18  | 0.093    | TKYETDAIQR               |
|    |              |                                                                 |      |      | 623.38  | 1244.75 | 1244.65 | 82.73  | 6.20E-06 | DIDDLELTLAK              |
|    |              |                                                                 |      |      | 661.87  | 1321.73 | 1320.66 | 42.87  | 0.05     | KLEDECSELKK              |
|    |              |                                                                 |      |      | 687.67  | 1373.32 | 1372.74 | 51.55  | 0.0072   | KDIDDLELTLAK             |
|    |              |                                                                 |      |      | 745.59  | 1489.17 | 1488.74 | 49.21  | 0.012    | ENQSVLITGESGAGK          |
|    |              |                                                                 |      |      | 748.77  | 1495.52 | 1495.73 | 65.05  | 0.00029  | KVQHELEEAER              |
|    |              |                                                                 |      |      | 761.65  | 1521.28 | 1520.76 | 81.03  | 7.70E-06 | AITDAAMMAEELKK           |

|    |              |                                                         |      |         |         |         |         |          |                       |                       |
|----|--------------|---------------------------------------------------------|------|---------|---------|---------|---------|----------|-----------------------|-----------------------|
|    |              |                                                         |      | 817.80  | 1633.58 | 1631.78 | 111.28  | 7.40E-09 | LEEAGGATAAQIEMNK      |                       |
|    |              |                                                         |      | 931.71  | 1861.40 | 1858.88 | 102.14  | 5.50E-08 | LEQQVDDLEGSLEQEK      |                       |
|    |              |                                                         |      | 942.98  | 1883.95 | 1884.92 | 100.93  | 7.00E-08 | QADSV AELGEQIDNLQR    |                       |
|    |              |                                                         |      | 994.44  | 1986.87 | 1986.97 | 82.62   | 4.70E-06 | LEQQVDDLEGSLEQEKK     |                       |
|    |              |                                                         |      | 1044.14 | 2086.27 | 2088.02 | 75.58   | 2.30E-05 | TKLEQQVDDLEGSLEQEK    |                       |
|    |              |                                                         |      | 1107.99 | 2213.97 | 2213.03 | 75.84   | 2.10E-05 | AEIQTAL EEAEGTLEHEESK |                       |
|    |              |                                                         |      | 739.60  | 2215.76 | 2216.12 | 50.27   | 0.0076   | TKLEQQVDDLEGSLEQEKK   |                       |
|    |              |                                                         |      | 1183.60 | 2365.19 | 2366.12 | 87.76   | 1.30E-06 | LQFFNH HMFVLEQEEYK    |                       |
| 13 | gj 189519131 | PREDICTED: ns:zf-e68 [Danio rerio]                      | 46.1 | 1935    | 538.17  | 1074.32 | 1073.54 | 42.91    | 0.063                 | ADIAESQV NK           |
|    |              |                                                         |      |         | 612.98  | 1223.95 | 1223.61 | 40.18    | 0.093                 | TKYETDAIQR            |
|    |              |                                                         |      |         | 623.38  | 1244.75 | 1244.65 | 82.73    | 6.20E-06              | DIDDLELTLAK           |
|    |              |                                                         |      |         | 661.87  | 1321.73 | 1320.66 | 42.87    | 0.05                  | KLEDECSELKK           |
|    |              |                                                         |      |         | 687.67  | 1373.32 | 1372.74 | 51.55    | 0.0072                | KDIDDLELTLAK          |
|    |              |                                                         |      |         | 745.59  | 1489.17 | 1488.74 | 49.21    | 0.012                 | ENQSVLITGESGAGK       |
|    |              |                                                         |      |         | 748.77  | 1495.52 | 1495.73 | 65.05    | 0.00029               | KVQHELEEAER           |
|    |              |                                                         |      |         | 761.65  | 1521.28 | 1520.76 | 81.03    | 7.70E-06              | AITDAAMMAEELKK        |
|    |              |                                                         |      |         | 817.80  | 1633.58 | 1631.78 | 111.28   | 7.40E-09              | LEEAGGATAAQIEMNK      |
|    |              |                                                         |      |         | 931.71  | 1861.40 | 1858.88 | 102.14   | 5.50E-08              | LEQQVDDLEGSLEQEK      |
|    |              |                                                         |      |         | 942.98  | 1883.95 | 1884.92 | 100.93   | 7.00E-08              | QADSV AELGEQIDNLQR    |
|    |              |                                                         |      |         | 994.44  | 1986.87 | 1986.97 | 82.62    | 4.70E-06              | LEQQVDDLEGSLEQEKK     |
|    |              |                                                         |      |         | 1044.14 | 2086.27 | 2088.02 | 75.58    | 2.30E-05              | TKLEQQVDDLEGSLEQEK    |
|    |              |                                                         |      |         | 1107.99 | 2213.97 | 2213.03 | 75.84    | 2.10E-05              | AEIQTAL EEAEGTLEHEESK |
|    |              |                                                         |      |         | 739.60  | 2215.76 | 2216.12 | 50.27    | 0.0076                | TKLEQQVDDLEGSLEQEKK   |
|    |              |                                                         |      |         | 1183.60 | 2365.19 | 2366.12 | 87.76    | 1.30E-06              | LQFFNH HMFVLEQEEYK    |
| 14 | gj 66472732  | myosin heavy chain 4 [Danio rerio]                      | 50.9 | 1935    | 612.98  | 1223.95 | 1223.61 | 40.18    | 0.093                 | TKYETDAIQR            |
|    |              |                                                         |      |         | 623.38  | 1244.75 | 1244.65 | 82.73    | 6.20E-06              | DIDDLELTLAK           |
|    |              |                                                         |      |         | 661.87  | 1321.73 | 1320.66 | 42.87    | 0.05                  | KLEDECSELKK           |
|    |              |                                                         |      |         | 687.67  | 1373.32 | 1372.74 | 51.55    | 0.0072                | KDIDDLELTLAK          |
|    |              |                                                         |      |         | 745.59  | 1489.17 | 1488.74 | 49.21    | 0.012                 | ENQSVLITGESGAGK       |
|    |              |                                                         |      |         | 748.77  | 1495.52 | 1495.73 | 65.05    | 0.00029               | KVQHELEEAER           |
|    |              |                                                         |      |         | 761.65  | 1521.28 | 1520.76 | 81.03    | 7.70E-06              | AITDAAMMAEELKK        |
|    |              |                                                         |      |         | 817.80  | 1633.58 | 1631.78 | 111.28   | 7.40E-09              | LEEAGGATAAQIEMNK      |
|    |              |                                                         |      |         | 931.71  | 1861.40 | 1858.88 | 102.14   | 5.50E-08              | LEQQVDDLEGSLEQEK      |
|    |              |                                                         |      |         | 942.98  | 1883.95 | 1884.92 | 100.93   | 7.00E-08              | QADSV AELGEQIDNLQR    |
|    |              |                                                         |      |         | 994.44  | 1986.87 | 1986.97 | 82.62    | 4.70E-06              | LEQQVDDLEGSLEQEKK     |
|    |              |                                                         |      |         | 1044.14 | 2086.27 | 2088.02 | 75.58    | 2.30E-05              | TKLEQQVDDLEGSLEQEK    |
|    |              |                                                         |      |         | 1107.99 | 2213.97 | 2213.03 | 75.84    | 2.10E-05              | AEIQTAL EEAEGTLEHEESK |
|    |              |                                                         |      |         | 739.60  | 2215.76 | 2216.12 | 50.27    | 0.0076                | TKLEQQVDDLEGSLEQEKK   |
|    |              |                                                         |      |         | 1183.60 | 2365.19 | 2366.12 | 87.76    | 1.30E-06              | LQFFNH HMFVLEQEEYK    |
| 15 | gj 189525553 | PREDICTED: hypothetical protein LOC336197 [Danio rerio] | 90.1 | 517     | 471.62  | 941.22  | 940.53  | 45.28    | 0.03                  | VLDTGAPIR             |
|    |              |                                                         |      |         | 545.57  | 1089.13 | 1087.63 | 44.02    | 0.048                 | VVDLLAPYAK            |
|    |              |                                                         |      |         | 693.70  | 1385.39 | 1384.70 | 73.21    | 5.00E-05              | IMNVIGEPIDER          |
|    |              |                                                         |      |         | 1407.02 | 1406.01 | 1405.67 | 38.39    | 0.14                  | AHGGYSVFAGVGER        |
|    |              |                                                         |      |         | 718.44  | 1434.87 | 1434.75 | 96.54    | 2.20E-07              | FTQAGSEVSALLGR        |
|    |              |                                                         |      |         | 730.24  | 1458.47 | 1456.83 | 71.39    | 7.30E-05              | TVLIMELINNVAK         |
|    |              |                                                         |      |         | 839.54  | 1677.07 | 1676.92 | 99.39    | 1.20E-07              | LVLEVAQHLGENTVR       |
|    |              |                                                         |      |         | 916.20  | 1830.39 | 1828.88 | 61.80    | 0.00061               | IMDPNIVGTEHYDVAR      |
|    |              |                                                         |      |         | 962.57  | 1923.13 | 1920.96 | 72.13    | 5.30E-05              | DQEGQDVLLFIDNIFR      |
|    |              |                                                         |      |         | 994.51  | 1987.01 | 1987.03 | 85.08    | 2.70E-06              | AIAELGIYPAVDPLDSTSR   |
|    |              |                                                         |      |         | 1004.49 | 2006.96 | 2004.05 | 45.00    | 0.026                 | FLSQPFQVAEVFTGHLGK    |
|    |              |                                                         |      |         | 688.51  | 2062.50 | 2059.99 | 44.65    | 0.029                 | EGNDLYHEMIESGVINLK    |
|    |              |                                                         |      |         | 1060.47 | 2118.93 | 2118.04 | 99.97    | 8.30E-08              | SLQDI IAILGMDELSEEDK  |

|    |              |                                                   |      |         |         |         |         |          |                          |                             |
|----|--------------|---------------------------------------------------|------|---------|---------|---------|---------|----------|--------------------------|-----------------------------|
|    |              |                                                   |      | 1330.37 | 2658.73 | 2658.38 | 88.28   | 1.00E-06 | SLQDIIAILGMDELSEEDKLTVAR |                             |
|    |              |                                                   |      | 1492.02 | 2982.02 | 2981.47 | 59.23   | 0.00072  | SILGGEYDALPEQAFYVMVGPIEE |                             |
|    |              |                                                   |      | 1239.89 | 3716.65 | 3713.88 | 38.82   | 0.059    | GSITSVQAIYVPADDLTDPAPAT  |                             |
|    |              |                                                   |      | 1281.83 | 3842.46 | 3841.97 | 37.36   | 0.078    | KGSITSVQAIYVPADDLTDPAPA  |                             |
| 16 | gi 189540216 | PREDICTED: wu:fd14a01 [Danio rerio]               | 41.7 | 1936    | 538.17  | 1074.32 | 1073.54 | 42.91    | 0.063                    | ADIAESQVNK                  |
|    |              |                                                   |      |         | 612.98  | 1223.95 | 1223.61 | 40.18    | 0.093                    | TKYETDAIQR                  |
|    |              |                                                   |      |         | 623.38  | 1244.75 | 1244.65 | 82.73    | 6.20E-06                 | DIDDLELTLAK                 |
|    |              |                                                   |      |         | 661.87  | 1321.73 | 1320.66 | 42.87    | 0.05                     | KLEDECSELKK                 |
|    |              |                                                   |      |         | 687.67  | 1373.32 | 1372.74 | 51.55    | 0.0072                   | KDIDDLELTLAK                |
|    |              |                                                   |      |         | 745.59  | 1489.17 | 1488.74 | 49.21    | 0.012                    | ENQSVLITGESGAGK             |
|    |              |                                                   |      |         | 761.65  | 1521.28 | 1520.76 | 81.03    | 7.70E-06                 | AITDAAMMAEELKK              |
|    |              |                                                   |      |         | 817.80  | 1633.58 | 1631.78 | 111.28   | 7.40E-09                 | LEEAGGATAAQIEMNK            |
|    |              |                                                   |      |         | 931.71  | 1861.40 | 1858.88 | 102.14   | 5.50E-08                 | LEQQVDDLEGSLEQEK            |
|    |              |                                                   |      |         | 942.98  | 1883.95 | 1884.92 | 100.93   | 7.00E-08                 | QADSVaelGEQIDNLQR           |
|    |              |                                                   |      |         | 994.44  | 1986.87 | 1986.97 | 82.62    | 4.70E-06                 | LEQQVDDLEGSLEQEKK           |
|    |              |                                                   |      |         | 1183.60 | 2365.19 | 2366.12 | 87.76    | 1.30E-06                 | LQFFNHMHFVLEQEEYK           |
| 17 | gi 23097290  | troponin T2, cardiac [Danio rerio]                | 28   | 282     | 718.41  | 717.40  | 717.35  | 38.58    | 0.21                     | ELEAEK                      |
|    |              |                                                   |      |         | 431.68  | 861.35  | 861.41  | 41.02    | 0.1                      | KEEEEEAK                    |
|    |              |                                                   |      |         | 580.62  | 1159.23 | 1158.57 | 37.45    | 0.21                     | FELQYQFGK                   |
|    |              |                                                   |      |         | 1217.66 | 1216.65 | 1216.66 | 71.14    | 9.10E-05                 | KEEEEEISLK                  |
|    |              |                                                   |      |         | 674.08  | 1346.15 | 1344.75 | 80.98    | 8.50E-06                 | KKEEEEEISLK                 |
|    |              |                                                   |      |         | 571.64  | 1711.88 | 1710.90 | 63.71    | 0.00039                  | RKPLDIDNANESALR             |
|    |              |                                                   |      |         | 957.91  | 1913.80 | 1913.95 | 85.11    | 2.70E-06                 | DLNELQTLIEAHFESR            |
| 18 | gi 83025080  | actinin, alpha 2 [Danio rerio]                    | 48.2 | 895     | 410.26  | 1227.75 | 1226.64 | 56.49    | 0.0025                   | HRPDLIDYAK                  |
|    |              |                                                   |      |         | 762.20  | 1522.39 | 1520.71 | 50.51    | 0.0085                   | AGTQIENIEEDFR               |
|    |              |                                                   |      |         | 547.73  | 1640.17 | 1640.72 | 43.32    | 0.044                    | HEAFESDLSAHQDR              |
|    |              |                                                   |      |         | 842.32  | 1682.63 | 1680.90 | 63.92    | 0.00038                  | LLETVDQLFLEYAK              |
|    |              |                                                   |      |         | 859.65  | 1717.29 | 1715.95 | 47.07    | 0.019                    | ILAADKPYILSDEL              |
|    |              |                                                   |      |         | 885.64  | 1769.26 | 1768.81 | 74.13    | 3.60E-05                 | KHEAFESDLSAHQDR             |
|    |              |                                                   |      |         | 916.28  | 1830.54 | 1828.89 | 57.77    | 0.0015                   | MLDAEDILSTPKPDER            |
|    |              |                                                   |      |         | 933.28  | 1864.55 | 1861.89 | 100.43   | 8.10E-08                 | MVSDIASAWQGLEQAEK           |
|    |              |                                                   |      |         | 969.81  | 1937.61 | 1934.98 | 110.25   | 8.20E-09                 | GDLTNPYSTITAEIEIAIK         |
|    |              |                                                   |      |         | 667.40  | 1999.16 | 1998.01 | 38.70    | 0.11                     | LEGDHQLIQESLIFDNK           |
|    |              |                                                   |      |         | 701.57  | 2101.67 | 2099.09 | 78.17    | 1.30E-05                 | LNKDDPLGNLNLAFDIAEK         |
|    |              |                                                   |      |         | 968.50  | 2902.48 | 2899.50 | 71.13    | 4.90E-05                 | IFQSYGIRGDLTNPYSTITAEIEIAIK |
| 19 | gi 51592073  | actin, alpha, cardiac muscle 1 like [Danio rerio] | 70.3 | 377     | 489.44  | 976.86  | 975.44  | 48.58    | 0.016                    | AGFAGDDAPR                  |
|    |              |                                                   |      |         | 566.61  | 1131.20 | 1129.54 | 50.00    | 0.012                    | GYSFVTTAER                  |
|    |              |                                                   |      |         | 1161.09 | 1160.08 | 1160.61 | 45.99    | 0.029                    | EITALAPSTMK                 |
|    |              |                                                   |      |         | 600.12  | 1198.22 | 1197.70 | 43.75    | 0.045                    | AVFPSIVGRPR                 |
|    |              |                                                   |      |         | 758.70  | 1515.39 | 1514.74 | 39.42    | 0.12                     | IWHHTFYNELR                 |
|    |              |                                                   |      |         | 895.41  | 1788.80 | 1789.88 | 109.38   | 1.10E-08                 | SYELPDGQVITIGNER            |
|    |              |                                                   |      |         | 977.94  | 1953.87 | 1955.04 | 84.21    | 3.20E-06                 | VAPEEHPTLLTEAPLNPK          |
|    |              |                                                   |      |         | 1115.18 | 2228.34 | 2227.06 | 49.56    | 0.009                    | DLYANNVLSGGTTMYPGIADR       |
| 20 | gi 50344786  | cardiac muscle alpha actin 1 [Danio rerio]        | 69.2 | 377     | 1066.60 | 3196.78 | 3195.60 | 56.69    | 0.0012                   | TTGIVLDSGDGVTHNVPIYEGYA     |
|    |              |                                                   |      |         | 489.44  | 976.86  | 975.44  | 48.58    | 0.016                    | AGFAGDDAPR                  |
|    |              |                                                   |      |         | 566.61  | 1131.20 | 1129.54 | 50.00    | 0.012                    | GYSFVTTAER                  |
|    |              |                                                   |      |         | 1161.09 | 1160.08 | 1160.61 | 45.99    | 0.029                    | EITALAPSTMK                 |
|    |              |                                                   |      |         | 600.12  | 1198.22 | 1197.70 | 43.75    | 0.045                    | AVFPSIVGRPR                 |
|    |              |                                                   |      |         | 758.70  | 1515.39 | 1514.74 | 39.42    | 0.12                     | IWHHTFYNELR                 |
|    |              |                                                   |      |         | 895.41  | 1788.80 | 1789.88 | 109.38   | 1.10E-08                 | SYELPDGQVITIGNER            |
|    |              |                                                   |      |         | 977.94  | 1953.87 | 1955.04 | 84.21    | 3.20E-06                 | VAPEEHPTLLTEAPLNPK          |
|    |              |                                                   |      |         | 1115.18 | 2228.34 | 2227.06 | 49.56    | 0.009                    | DLYANNVLSGGTTMYPGIADR       |



|    |             |                                                         |      |     |         |         |         |        |          |                          |
|----|-------------|---------------------------------------------------------|------|-----|---------|---------|---------|--------|----------|--------------------------|
| 21 | gi 62955473 | hypothetical protein LOC550445 [Danio rerio]            | 63.7 | 377 | 1066.60 | 3196.78 | 3195.60 | 56.69  | 0.0012   | TTGIVLDSGDGVTHNVPIYEGYA  |
|    |             |                                                         |      |     | 489.44  | 976.86  | 975.44  | 48.58  | 0.016    | AGFAGDDAPR               |
|    |             |                                                         |      |     | 566.61  | 1131.20 | 1129.54 | 50.00  | 0.012    | GYSFVTTAER               |
|    |             |                                                         |      |     | 600.12  | 1198.22 | 1197.70 | 43.75  | 0.045    | AVFPSIVGRPR              |
|    |             |                                                         |      |     | 758.70  | 1515.39 | 1514.74 | 39.42  | 0.12     | IWHHTFYNELR              |
|    |             |                                                         |      |     | 895.41  | 1788.80 | 1789.88 | 109.38 | 1.10E-08 | SYELPDGQVITIGNER         |
|    |             |                                                         |      |     | 977.94  | 1953.87 | 1955.04 | 84.21  | 3.20E-06 | VAPEEHPTLLTEAPLNPK       |
|    |             |                                                         |      |     | 1115.18 | 2228.34 | 2227.06 | 49.56  | 0.009    | DLYANNVLSGGTTMYPGIADR    |
|    |             |                                                         |      |     | 1066.60 | 3196.78 | 3195.60 | 56.69  | 0.0012   | TTGIVLDSGDGVTHNVPIYEGYA  |
|    |             |                                                         |      |     | 489.44  | 976.86  | 975.44  | 48.58  | 0.016    | AGFAGDDAPR               |
| 22 | gi 18858249 | actin, alpha 1, skeletal muscle [Danio rerio]           | 64.2 | 377 | 566.61  | 1131.20 | 1129.54 | 50.00  | 0.012    | GYSFVTTAER               |
|    |             |                                                         |      |     | 1161.09 | 1160.08 | 1160.61 | 45.99  | 0.029    | EITALAPSTMK              |
|    |             |                                                         |      |     | 600.12  | 1198.22 | 1197.70 | 43.75  | 0.045    | AVFPSIVGRPR              |
|    |             |                                                         |      |     | 758.70  | 1515.39 | 1514.74 | 39.42  | 0.12     | IWHHTFYNELR              |
|    |             |                                                         |      |     | 895.41  | 1788.80 | 1789.88 | 109.38 | 1.10E-08 | SYELPDGQVITIGNER         |
|    |             |                                                         |      |     | 977.94  | 1953.87 | 1955.04 | 84.21  | 3.20E-06 | VAPEEHPTLLTEAPLNPK       |
|    |             |                                                         |      |     | 1115.18 | 2228.34 | 2227.06 | 49.56  | 0.009    | DLYANNVLSGGTTMYPGIADR    |
|    |             |                                                         |      |     | 544.45  | 1086.88 | 1086.57 | 53.90  | 0.005    | VSDLNQAVNK               |
|    |             |                                                         |      |     | 549.51  | 1097.01 | 1094.55 | 50.25  | 0.01     | AELQHLNDR                |
|    |             |                                                         |      |     | 591.47  | 1180.92 | 1179.55 | 48.04  | 0.016    | EAGGYQDTIAR              |
| 23 | gi 18858539 | desmin [Danio rerio]                                    | 49.3 | 473 | 1254.56 | 1253.55 | 1253.56 | 47.66  | 0.017    | NISEAEDWYK               |
|    |             |                                                         |      |     | 642.15  | 1282.28 | 1281.59 | 37.33  | 0.18     | IAELYEEEMR               |
|    |             |                                                         |      |     | 889.27  | 1776.52 | 1775.91 | 103.59 | 4.40E-08 | FLEQQNSALTVEIER          |
|    |             |                                                         |      |     | 991.08  | 1980.14 | 1978.97 | 91.31  | 6.40E-07 | LDFNLADAINQDFLNTR        |
|    |             |                                                         |      |     | 1094.09 | 2186.17 | 2186.00 | 151.75 | 5.70E-13 | TFGSGLGSSIFAGHGSSGSSGS   |
|    |             |                                                         |      |     | 471.62  | 941.22  | 940.53  | 45.28  | 0.03     | VLDTGAPIR                |
|    |             |                                                         |      |     | 545.57  | 1089.13 | 1087.63 | 44.02  | 0.048    | VVDLLAPYAK               |
|    |             |                                                         |      |     | 693.70  | 1385.39 | 1384.70 | 73.21  | 5.00E-05 | IMNVIGEPIDER             |
|    |             |                                                         |      |     | 1407.02 | 1406.01 | 1405.67 | 38.39  | 0.14     | AHGGYSVFAGVGER           |
|    |             |                                                         |      |     | 718.44  | 1434.87 | 1434.75 | 96.54  | 2.20E-07 | FTQAGSEVSALLGR           |
| 24 | gi 66773080 | ATP synthase, H+ transporting, mitochondrial F1 comple: | 85.5 | 517 | 730.24  | 1458.47 | 1456.83 | 71.39  | 7.30E-05 | TVLIMELINNVAK            |
|    |             |                                                         |      |     | 839.54  | 1677.07 | 1676.92 | 99.39  | 1.20E-07 | LVLEVAQHLGENTVR          |
|    |             |                                                         |      |     | 916.20  | 1830.39 | 1828.88 | 61.80  | 0.00061  | IMDPNIVGTEHYDVAR         |
|    |             |                                                         |      |     | 962.57  | 1923.13 | 1920.96 | 72.13  | 5.30E-05 | DQEGQDVLLFIDNIFR         |
|    |             |                                                         |      |     | 994.51  | 1987.01 | 1987.03 | 85.08  | 2.70E-06 | AIAELGIYPAVDPLDSTSR      |
|    |             |                                                         |      |     | 1004.49 | 2006.96 | 2004.05 | 45.00  | 0.026    | FLSQPFQVAEVFTGHLGK       |
|    |             |                                                         |      |     | 688.51  | 2062.50 | 2059.99 | 44.65  | 0.029    | EGNDLYHEMIESGVINLK       |
|    |             |                                                         |      |     | 1492.02 | 2982.02 | 2981.47 | 59.23  | 0.00072  | SILGGEYDALPEQAFYMGPIEE   |
|    |             |                                                         |      |     | 1239.89 | 3716.65 | 3713.88 | 38.82  | 0.059    | GSITSVQAIYVPADDLTD PAPAT |
|    |             |                                                         |      |     | 1281.83 | 3842.46 | 3841.97 | 37.36  | 0.078    | KGSITSVQAIYVPADDLTD PAPA |
| 25 | gi 47551317 | enolase 3, (beta, muscle) [Danio rerio]                 | 58.7 | 433 | 469.64  | 937.27  | 937.50  | 41.97  | 0.059    | HIADLAGNK                |
|    |             |                                                         |      |     | 573.42  | 1144.82 | 1142.61 | 42.17  | 0.07     | IGAEVYHNLK               |
|    |             |                                                         |      |     | 687.18  | 1372.35 | 1372.70 | 64.40  | 0.00037  | HITGEQLGDLYK             |
|    |             |                                                         |      |     | 719.58  | 1437.14 | 1435.72 | 86.91  | 2.00E-06 | GNPTVEVDLYTTK            |
|    |             |                                                         |      |     | 1053.67 | 2105.32 | 2104.07 | 89.76  | 9.10E-07 | FTGSVDIQVVGDDLTVTNPK     |
|    |             |                                                         |      |     | 1060.03 | 2118.04 | 2118.12 | 91.79  | 5.50E-07 | DVILPVPFNVINGGSHAGNK     |
| 26 | gi 66792936 | tropomyosin 4 isoform 1 [Danio rerio]                   | 75.7 | 284 | 1372.83 | 2743.65 | 2742.33 | 73.97  | 2.70E-05 | DATNVGDEGGFAPNILENNEALI  |
|    |             |                                                         |      |     | 537.56  | 1073.11 | 1072.55 | 55.86  | 0.0032   | LDKENAIDR                |
|    |             |                                                         |      |     | 586.09  | 1170.17 | 1169.67 | 73.35  | 5.00E-05 | LVILEGELER               |
|    |             |                                                         |      |     | 623.52  | 1245.02 | 1242.65 | 66.73  | 0.00025  | IQLVEELDR                |
|    |             |                                                         |      |     | 628.87  | 1255.73 | 1256.66 | 64.85  | 0.00034  | QLDDELVGLQK              |
|    |             |                                                         |      |     | 637.15  | 1272.29 | 1271.61 | 72.43  | 6.20E-05 | AADAEGDVAALNR            |

|    |              |                                                                 |      |        |         |         |         |          |                      |                          |
|----|--------------|-----------------------------------------------------------------|------|--------|---------|---------|---------|----------|----------------------|--------------------------|
|    |              |                                                                 |      | 651.07 | 1300.13 | 1297.76 | 59.34   | 0.0012   | KLVILEGELER          |                          |
|    |              |                                                                 |      | 700.72 | 1399.42 | 1399.71 | 107.10  | 1.90E-08 | KAADAEGDVAALNR       |                          |
|    |              |                                                                 |      | 770.15 | 1538.28 | 1537.71 | 100.31  | 8.80E-08 | SIDDLEDELYAQK        |                          |
|    |              |                                                                 |      | 700.72 | 2099.13 | 2099.09 | 80.39   | 7.70E-06 | LELSEKKAADAEGDVAALNR |                          |
|    |              |                                                                 |      | 747.65 | 2239.92 | 2239.05 | 56.88   | 0.0017   | QTEDELDKYSEALKDAQEK  |                          |
|    |              |                                                                 |      | 770.15 | 2307.42 | 2307.18 | 54.59   | 0.0027   | TVAKLEKSIDDLEDELYAQK |                          |
| 27 | gi 189523699 | PREDICTED: titin a [Danio rerio]                                | 43.9 | 32757  | 824.59  | 823.58  | 822.50  | 52.54    | 0.0048               | VHIVIDK                  |
|    |              |                                                                 |      |        | 511.18  | 1020.34 | 1019.54 | 37.43    | 0.21                 | ITDQYRPK                 |
|    |              |                                                                 |      |        | 567.76  | 1133.51 | 1133.57 | 64.96    | 0.00036              | KGDVTLSDSGR              |
|    |              |                                                                 |      |        | 705.08  | 1408.14 | 1407.69 | 57.46    | 0.0017               | TDDKFEVLQEGK             |
|    |              |                                                                 |      |        | 749.20  | 1496.39 | 1495.81 | 47.75    | 0.016                | KFDNLFFIEVPK             |
|    |              |                                                                 |      |        | 781.54  | 1561.07 | 1560.75 | 40.14    | 0.095                | EHSEVIPHTQQEK            |
|    |              |                                                                 |      |        | 819.76  | 1637.51 | 1636.89 | 41.42    | 0.067                | VEIPDIELPDELKK           |
|    |              |                                                                 |      |        | 878.68  | 1755.35 | 1752.99 | 47.59    | 0.016                | EAEILKPLASVEVVEK         |
|    |              |                                                                 |      |        | 907.31  | 1812.60 | 1811.95 | 45.44    | 0.026                | IGVGETADIPGSVIIEDK       |
|    |              |                                                                 |      |        | 908.46  | 1814.91 | 1812.91 | 55.97    | 0.0023               | ASQAPSAPDDLIVTDVSK       |
|    |              |                                                                 |      |        | 926.82  | 1851.63 | 1850.96 | 67.65    | 0.00015              | STVILGWEKPLHDGGSR        |
|    |              |                                                                 |      |        | 623.27  | 1866.79 | 1866.98 | 62.77    | 0.00047              | RRDEEAPTQIVPDITK         |
|    |              |                                                                 |      |        | 940.78  | 1879.54 | 1878.92 | 96.56    | 1.90E-07             | TPLHDGGAEVSHYIVER        |
|    |              |                                                                 |      |        | 947.81  | 1893.61 | 1892.90 | 71.72    | 5.80E-05             | HTVTLWEKPDHDGGSK         |
|    |              |                                                                 |      |        | 962.72  | 1923.43 | 1922.99 | 53.01    | 0.0043               | AVNAAGVGEPGEVADVIEVK     |
|    |              |                                                                 |      |        | 976.57  | 1951.13 | 1950.02 | 85.98    | 2.10E-06             | SSDIVQISSTPTSSTLSIK      |
|    |              |                                                                 |      |        | 1029.44 | 2056.87 | 2056.09 | 59.01    | 0.001                | ELPISFVTPLADVHVYEK       |
|    |              |                                                                 |      |        | 1052.34 | 2102.66 | 2102.05 | 88.77    | 1.10E-06             | EQVTHQAALLQSHEVQER       |
|    |              |                                                                 |      |        | 1060.46 | 2118.90 | 2118.12 | 44.96    | 0.026                | ASIEITPSFTLLIENVDR       |
|    |              |                                                                 |      |        | 1062.63 | 2123.25 | 2122.13 | 56.57    | 0.0018               | VLDRPGPSSGPLDITGLTAEK    |
|    |              |                                                                 |      |        | 1080.01 | 2158.01 | 2157.24 | 74.26    | 3.20E-05             | KVPAKPVEAITVPTTEPPKK     |
|    |              |                                                                 |      |        | 734.17  | 2199.49 | 2199.29 | 49.32    | 0.0099               | KEPKPESILQVISTPVPLPK     |
|    |              |                                                                 |      |        | 1114.26 | 2226.51 | 2226.10 | 51.16    | 0.0064               | EHVIEWFKPENDGGSEIK       |
|    |              |                                                                 |      |        | 1133.96 | 2265.91 | 2265.23 | 36.44    | 0.18                 | KEQHKPVVLSVNETTQTLK      |
|    |              |                                                                 |      |        | 1137.55 | 2273.09 | 2271.31 | 36.90    | 0.16                 | VEIQDKPLLPEGPVVVDALLK    |
|    |              |                                                                 |      |        | 1151.39 | 2300.76 | 2300.07 | 97.12    | 1.50E-07             | EVTNSVTLWEKPDHDGGSR      |
|    |              |                                                                 |      |        | 1682.58 | 5044.72 | 5042.61 | 49.40    | 0.0026               | HQLQADQSSLIPGLDSAISVQPL  |
| 28 | gi 38707983  | aconitase 2, mitochondrial [Danio rerio]                        | 55.2 | 782    | 854.52  | 853.51  | 853.47  | 42.30    | 0.051                | IHETNLK                  |
|    |              |                                                                 |      |        | 1160.53 | 1159.52 | 1159.57 | 47.24    | 0.022                | GEIATLADENK              |
|    |              |                                                                 |      |        | 1362.65 | 1361.64 | 1361.61 | 50.84    | 0.0084               | FEPSSYINYDK              |
|    |              |                                                                 |      |        | 786.32  | 1570.62 | 1568.82 | 42.98    | 0.051                | FKLEPPTGDELPAR           |
|    |              |                                                                 |      |        | 1695.86 | 1694.85 | 1694.78 | 63.98    | 0.00039              | FNPETDYLTAPNGEK          |
|    |              |                                                                 |      |        | 878.21  | 1754.41 | 1752.88 | 63.36    | 0.00043              | IVYGHLLDDPAGQEIAR        |
|    |              |                                                                 |      |        | 890.24  | 1778.47 | 1777.89 | 41.25    | 0.074                | QGLLPLTFSNPADYDK         |
|    |              |                                                                 |      |        | 1041.78 | 2081.55 | 2080.94 | 106.96   | 1.70E-08             | NNISWVVVGDENYGEGSSR      |
|    |              |                                                                 |      |        | 1080.47 | 2158.92 | 2157.96 | 40.01    | 0.084                | DFDPGQDTYQHPPADGSALK     |
|    |              |                                                                 |      |        | 1267.12 | 2532.23 | 2532.29 | 157.81   | 1.20E-13             | GHLDNISNLLIGAVNIENDGVN   |
|    |              |                                                                 |      |        | 1363.00 | 2723.98 | 2721.43 | 42.38    | 0.038                | NDANPATHAFVTSPEIVTALAIAK |
| 29 | gi 41054651  | isocitrate dehydrogenase 2 (NADP+), mitochondrial [Danio rerio] | 67.7 | 449    | 588.63  | 1175.24 | 1174.60 | 50.29    | 0.011                | ATDFVVNQPGK              |
|    |              |                                                                 |      |        | 677.67  | 1353.33 | 1354.68 | 79.89    | 9.70E-06             | TIEAEAAHGTVTR            |
|    |              |                                                                 |      |        | 716.14  | 1430.27 | 1428.73 | 81.19    | 7.70E-06             | FKDIFQDIFEK              |
|    |              |                                                                 |      |        | 861.03  | 1720.05 | 1719.82 | 124.78   | 3.30E-10             | DQTDDQVTIDSAIATK         |
|    |              |                                                                 |      |        | 947.29  | 1892.57 | 1891.93 | 67.72    | 0.00015              | LNEHYVNTTDFLDAIK         |
| 30 | gi 189523697 | PREDICTED: im:6911926 [Danio rerio]                             | 42.3 | 28836  | 431.68  | 861.35  | 860.46  | 39.18    | 0.16                 | KKEEEAK                  |
|    |              |                                                                 |      |        | 701.73  | 1401.45 | 1399.71 | 64.74    | 0.00035              | HVSVEALDFIDR             |
|    |              |                                                                 |      |        | 763.17  | 1524.32 | 1523.73 | 49.92    | 0.0097               | SDSGVYYLHLENK            |

|    |              |                                                        |      |         |         |         |         |          |                         |                         |
|----|--------------|--------------------------------------------------------|------|---------|---------|---------|---------|----------|-------------------------|-------------------------|
|    |              |                                                        |      | 787.63  | 1573.25 | 1572.78 | 78.62   | 1.40E-05 | FGQSGPSEPSGPVVTK        |                         |
|    |              |                                                        |      | 802.58  | 1603.15 | 1602.86 | 37.57   | 0.18     | YGVSEPLVSQNVIK          |                         |
|    |              |                                                        |      | 823.16  | 1644.31 | 1642.77 | 62.59   | 0.00054  | VHGLIEDHEYEFR           |                         |
|    |              |                                                        |      | 878.68  | 1755.35 | 1752.99 | 47.59   | 0.016    | EAEILKPLASVEVVEK        |                         |
|    |              |                                                        |      | 885.70  | 1769.38 | 1768.91 | 59.08   | 0.0011   | SSVTLTWVKPAHDGGSK       |                         |
|    |              |                                                        |      | 894.79  | 1787.56 | 1787.83 | 38.15   | 0.15     | GENKVDVEYDEHINK         |                         |
|    |              |                                                        |      | 920.77  | 1839.53 | 1838.93 | 62.48   | 0.00051  | STVSLAWEKPLHDGGSR       |                         |
|    |              |                                                        |      | 923.72  | 1845.43 | 1845.01 | 63.56   | 0.0004   | VQILDKPGPPAGHIEFK       |                         |
|    |              |                                                        |      | 928.68  | 1855.35 | 1854.92 | 75.30   | 2.60E-05 | TSVSLSWEKPIHDGGSR       |                         |
|    |              |                                                        |      | 940.54  | 1879.06 | 1877.90 | 56.82   | 0.0018   | VLNYDEEVDDTRPVSK        |                         |
|    |              |                                                        |      | 950.74  | 1899.47 | 1898.91 | 53.37   | 0.004    | TTVTLSWEKPEHDGGSR       |                         |
|    |              |                                                        |      | 988.99  | 1975.96 | 1976.14 | 61.35   | 0.00062  | SQLERPGAPLKPVVSGITK     |                         |
|    |              |                                                        |      | 1002.79 | 2003.56 | 2002.96 | 75.42   | 2.40E-05 | KDNTSDDIGWVTVTSTHK      |                         |
|    |              |                                                        |      | 1028.44 | 2054.86 | 2055.07 | 95.10   | 2.60E-07 | LKGDVLSASPDVEIIEDGAK    |                         |
|    |              |                                                        |      | 1047.32 | 2092.62 | 2092.08 | 64.74   | 0.00028  | INVSALNSEGVGEAAPVPGSPK  |                         |
|    |              |                                                        |      | 1073.03 | 2144.05 | 2142.23 | 51.74   | 0.0055   | SFHVQVITLGPPSKPIGPIR    |                         |
|    |              |                                                        |      | 1258.48 | 2514.94 | 2514.23 | 83.61   | 3.10E-06 | HTLPVDSDISSDTTSVVTIPESH |                         |
|    |              |                                                        |      | 902.92  | 2705.72 | 2706.41 | 50.47   | 0.0062   | TPVLAVDPVEKPGEPENFQITEI |                         |
| 31 | gi 47085883  | hypothetical protein LOC406405 [Danio rerio]           | 82.5 | 337     | 465.05  | 928.09  | 927.46  | 41.82    | 0.074                   | HGVYNPNK                |
|    |              |                                                        |      |         | 537.92  | 1073.83 | 1072.58 | 43.90    | 0.05                    | IQEAGTEVVK              |
|    |              |                                                        |      |         | 661.60  | 1321.18 | 1319.67 | 86.06    | 2.40E-06                | GYIGADQLGDALK           |
|    |              |                                                        |      |         | 728.21  | 1454.40 | 1453.70 | 37.29    | 0.18                    | AGAGSATLSMAYAGAR        |
|    |              |                                                        |      |         | 751.99  | 1501.97 | 1502.77 | 100.04   | 1.00E-07                | VEFPADQLSALTGR          |
| 32 | gi 125829449 | PREDICTED: similar to myosin heavy chain [Danio rerio] | 39.8 | 1945    | 1544.85 | 3087.69 | 3088.58 | 95.05    | 1.80E-07                | NSPLVSELSLFDIAHTPGVAADL |
|    |              |                                                        |      |         | 538.17  | 1074.32 | 1073.54 | 42.91    | 0.063                   | ADIAESQVNK              |
|    |              |                                                        |      |         | 609.71  | 1217.41 | 1215.63 | 70.03    | 0.00011                 | AGLLGQLEEMR             |
|    |              |                                                        |      |         | 623.38  | 1244.75 | 1244.65 | 82.73    | 6.20E-06                | DIDDLEITLAK             |
|    |              |                                                        |      |         | 687.67  | 1373.32 | 1372.74 | 51.55    | 0.0072                  | KDIDDLEITLAK            |
|    |              |                                                        |      |         | 504.06  | 1509.15 | 1507.70 | 37.65    | 0.16                    | SDSSKELEELSER           |
|    |              |                                                        |      |         | 761.65  | 1521.28 | 1520.76 | 81.03    | 7.70E-06                | AITDAAMMAEELKK          |
|    |              |                                                        |      |         | 825.52  | 1649.02 | 1647.78 | 50.84    | 0.0083                  | LEEAGGATSAQIEMNK        |
|    |              |                                                        |      |         | 931.71  | 1861.40 | 1858.88 | 102.14   | 5.50E-08                | LEQQVDDLEGSLEQEK        |
|    |              |                                                        |      |         | 994.44  | 1986.87 | 1986.97 | 82.62    | 4.70E-06                | LEQQVDDLEGSLEQEKK       |
| 33 | gi 41054601  | voltage-dependent anion channel 2 [Danio rerio]        | 70.7 | 283     | 1107.99 | 2213.97 | 2213.03 | 64.44    | 0.00029                 | TEIQAALAEAEGTLEHEESK    |
|    |              |                                                        |      |         | 588.19  | 1174.36 | 1173.56 | 42.41    | 0.068                   | SEYGLTFTEK              |
|    |              |                                                        |      |         | 665.84  | 1329.67 | 1329.66 | 41.35    | 0.078                   | RSEYGLTFTEK             |
|    |              |                                                        |      |         | 779.53  | 1557.05 | 1555.79 | 43.02    | 0.05                    | LTFDITTFSPNTGKK         |
|    |              |                                                        |      |         | 1051.96 | 2101.91 | 2102.15 | 84.24    | 3.30E-06                | VNNTSLVGVGYTQSLRPGIK    |
| 34 | gi 148596963 | spectrin alpha 2 [Danio rerio]                         | 39.3 | 2480    | 1088.43 | 2174.84 | 2174.05 | 117.04   | 1.60E-09                | WNTDNTLGTEINIEDQIAK     |
|    |              |                                                        |      |         | 625.55  | 1249.08 | 1246.55 | 45.75    | 0.028                   | GEIDAHEDSFK             |
|    |              |                                                        |      |         | 773.69  | 1545.36 | 1544.77 | 82.66    | 5.60E-06                | HALLEADVAAHQDR          |
|    |              |                                                        |      |         | 787.68  | 1573.34 | 1571.78 | 67.18    | 0.0002                  | HQALQAEISGHEPR          |
|    |              |                                                        |      |         | 537.25  | 1608.71 | 1607.74 | 39.91    | 0.098                   | HQAFEAEELHANADR         |
|    |              |                                                        |      |         | 850.21  | 1698.40 | 1699.88 | 81.65    | 6.40E-06                | KHQALQAEISGHEPR         |
|    |              |                                                        |      |         | 862.42  | 1722.82 | 1720.86 | 58.01    | 0.0015                  | LIQSHPEAVDDIQEK         |
|    |              |                                                        |      |         | 925.80  | 1849.59 | 1848.86 | 86.05    | 2.20E-06                | KFEETFQDLAAHEER         |
|    |              |                                                        |      |         | 1010.84 | 2019.66 | 2018.99 | 60.19    | 0.00081                 | LQIASDENYKDPSNLQGK      |
|    |              |                                                        |      |         | 1077.78 | 2153.55 | 2153.10 | 88.67    | 1.10E-06                | ALINADELANDVAGAEALLDR   |
|    |              |                                                        |      |         | 1109.09 | 2216.17 | 2215.12 | 57.78    | 0.0014                  | RDELITNWEQIQTATER       |
|    |              |                                                        |      |         | 740.44  | 2218.30 | 2219.18 | 48.35    | 0.012                   | LEAELGAHEPAIQSVLETGKK   |
|    |              |                                                        |      |         | 1110.70 | 2219.39 | 2219.03 | 79.75    | 8.60E-06                | STDEAGQALLNTGHYASEEVK   |
|    |              |                                                        |      |         | 792.49  | 2374.44 | 2375.28 | 66.34    | 0.00018                 | RLEAELGAHEPAIQSVLETGKK  |

|    |              |                                                           |      |      |         |         |         |        |          |                          |
|----|--------------|-----------------------------------------------------------|------|------|---------|---------|---------|--------|----------|--------------------------|
| 35 | gi 18858961  | lactate dehydrogenase B4 [Danio rerio]                    | 66.8 | 334  | 1246.00 | 2489.99 | 2489.22 | 66.52  | 0.00016  | EKEPIVGSPPDYGKDEDSAEALLI |
|    |              |                                                           |      |      | 474.43  | 946.84  | 946.60  | 41.19  | 0.093    | HIIPQIVK                 |
|    |              |                                                           |      |      | 1205.61 | 1204.60 | 1204.61 | 48.45  | 0.016    | SSADTLWGIQK              |
|    |              |                                                           |      |      | 628.45  | 1254.88 | 1252.64 | 54.64  | 0.0035   | MVVDSAYEVIK              |
|    |              |                                                           |      |      | 769.60  | 1537.18 | 1537.77 | 108.51 | 1.30E-08 | IVADKDYSVTANSR           |
| 36 | gi 189535893 | PREDICTED: similar to myosin heavy chain [Danio rerio]    | 30.4 | 1938 | 844.16  | 1686.31 | 1684.85 | 113.65 | 4.30E-09 | ELADELALVDVVEDR          |
|    |              |                                                           |      |      | 857.97  | 1713.92 | 1714.82 | 40.76  | 0.08     | LNPDIGTDKDAENWK          |
|    |              |                                                           |      |      | 612.98  | 1223.95 | 1223.61 | 40.18  | 0.093    | TKYETDAIQR               |
|    |              |                                                           |      |      | 623.38  | 1244.75 | 1244.65 | 82.73  | 6.20E-06 | DLDDLEITLAK              |
|    |              |                                                           |      |      | 687.67  | 1373.32 | 1372.74 | 51.55  | 0.0072   | KDLDDLEITLAK             |
| 37 | gi 189537429 | PREDICTED: hypothetical protein [Danio rerio]             | 70.6 | 377  | 761.65  | 1521.28 | 1520.76 | 81.03  | 7.70E-06 | AITDAAMMAEELKK           |
|    |              |                                                           |      |      | 931.71  | 1861.40 | 1858.88 | 102.14 | 5.50E-08 | LEQQVDDLEGSLEQEK         |
|    |              |                                                           |      |      | 994.44  | 1986.87 | 1986.97 | 82.62  | 4.70E-06 | LEQQVDDLEGSLEQEKK        |
|    |              |                                                           |      |      | 489.44  | 976.86  | 975.44  | 48.58  | 0.016    | AGFAGDDAPR               |
|    |              |                                                           |      |      | 566.61  | 1131.20 | 1129.54 | 50.00  | 0.012    | GYSFVTTAER               |
| 38 | gi 18858335  | bactin1 [Danio rerio]                                     | 58.9 | 375  | 1161.09 | 1160.08 | 1160.61 | 45.99  | 0.029    | EITALAPSTMK              |
|    |              |                                                           |      |      | 600.12  | 1198.22 | 1197.70 | 43.75  | 0.045    | AVFPSIVGRPR              |
|    |              |                                                           |      |      | 758.70  | 1515.39 | 1514.74 | 39.42  | 0.12     | IWHHTFYNELR              |
|    |              |                                                           |      |      | 895.41  | 1788.80 | 1789.88 | 109.38 | 1.10E-08 | SYELPDGQVITIGNER         |
|    |              |                                                           |      |      | 978.73  | 1955.44 | 1953.06 | 67.08  | 0.00017  | VAPEEHPVLLTEAPLNPK       |
| 39 | gi 41053595  | nucleoside diphosphate kinase-Z2 [Danio rerio]            | 43.1 | 153  | 489.44  | 976.86  | 975.44  | 48.58  | 0.016    | AGFAGDDAPR               |
|    |              |                                                           |      |      | 566.61  | 1131.20 | 1131.52 | 37.35  | 0.22     | GYSFTTTAER               |
|    |              |                                                           |      |      | 600.12  | 1198.22 | 1197.70 | 43.75  | 0.045    | AVFPSIVGRPR              |
|    |              |                                                           |      |      | 758.70  | 1515.39 | 1514.74 | 39.42  | 0.12     | IWHHTFYNELR              |
|    |              |                                                           |      |      | 895.41  | 1788.80 | 1789.88 | 109.38 | 1.10E-08 | SYELPDGQVITIGNER         |
| 40 | gi 18858587  | elongation factor 1-alpha [Danio rerio]                   | 52.6 | 462  | 1100.63 | 1099.62 | 1098.53 | 52.09  | 0.0074   | NLIHGSDSEK               |
|    |              |                                                           |      |      | 795.69  | 1589.36 | 1588.88 | 74.37  | 3.60E-05 | LVAAKFVQASEDLAK          |
|    |              |                                                           |      |      | 651.06  | 1950.14 | 1949.07 | 70.76  | 7.00E-05 | GFRLVAAKFVQASEDLAK       |
|    |              |                                                           |      |      | 1106.96 | 2211.90 | 2211.12 | 85.26  | 2.40E-06 | SAATEVSLWFKPEELVSYR      |
|    |              |                                                           |      |      | 766.50  | 765.49  | 765.39  | 39.76  | 0.09     | FEEITK                   |
| 41 | gi 40786398  | pyruvate kinase, muscle, a [Danio rerio]                  | 47.2 | 532  | 794.93  | 1587.84 | 1587.87 | 74.02  | 4.00E-05 | THINIVVIGHVDSGK          |
|    |              |                                                           |      |      | 974.39  | 2920.14 | 2917.55 | 69.01  | 7.60E-05 | EGNASGTTLLDALDAILPPSRPT  |
|    |              |                                                           |      |      | 1016.88 | 3047.61 | 3045.65 | 53.55  | 0.0026   | KEGNASGTTLLDALDAILPPSRP  |
|    |              |                                                           |      |      | 587.69  | 1173.36 | 1170.61 | 37.35  | 0.22     | GDLGIEIPTEK              |
|    |              |                                                           |      |      | 820.11  | 1638.21 | 1635.88 | 86.12  | 2.30E-06 | GVNLPGAAVDLPVAVSEK       |
| 42 | gi 162287365 | hemopexin [Danio rerio]                                   | 34.7 | 447  | 882.32  | 1762.62 | 1763.98 | 104.58 | 3.40E-08 | KGVNLPGAAVDLPVAVSEK      |
|    |              |                                                           |      |      | 1286.58 | 2571.15 | 2569.21 | 90.02  | 7.00E-07 | GIFPIYNSPSNDVWAEDVDLR    |
|    |              |                                                           |      |      | 1211.64 | 1210.63 | 1210.61 | 43.92  | 0.04     | GHHFLSITGDK              |
|    |              |                                                           |      |      | 1339.66 | 1338.65 | 1338.61 | 63.11  | 0.00046  | FHSDTIESEFK              |
|    |              |                                                           |      |      | 600.27  | 1797.79 | 1800.00 | 61.55  | 0.00064  | VGKPTHLEGYPKPLK          |
| 43 | gi 189529246 | PREDICTED: hypothetical protein [Danio rerio]             | 64.7 | 119  | 720.67  | 2158.98 | 2159.07 | 62.14  | 0.00052  | GKPGGEGHKHELHHGAQLDR     |
|    |              |                                                           |      |      | 529.66  | 1057.30 | 1056.56 | 77.57  | 2.10E-05 | VAENVQELR                |
|    |              |                                                           |      |      | 599.58  | 1197.14 | 1195.75 | 45.88  | 0.027    | AKLEPVVLSLK              |
|    |              |                                                           |      |      | 1050.75 | 2099.49 | 2100.09 | 79.52  | 9.40E-06 | ELTELGEQVKPHFEGIFK       |
|    |              |                                                           |      |      | 743.41  | 2227.20 | 2228.18 | 62.96  | 0.00042  | KELTELGEQVKPHFEGIFK      |
| 44 | gi 48762657  | enolase 1, (alpha) [Danio rerio]                          | 61.1 | 432  | 573.42  | 1144.82 | 1142.61 | 42.17  | 0.07     | IGAEVYHNLK               |
|    |              |                                                           |      |      | 1504.37 | 3006.73 | 3006.57 | 90.04  | 5.90E-07 | HIADLAGNPDVILPVPFNVINGC  |
| 45 | gi 66773050  | myosin, heavy polypeptide 11, smooth muscle [Danio rerio] | 39.6 | 1974 | 864.56  | 1727.10 | 1725.94 | 69.31  | 0.00011  | QLLQANPILEAFGNAK         |
|    |              |                                                           |      |      | 586.03  | 1755.05 | 1753.87 | 55.57  | 0.0026   | KQELEEILHEMEAR           |
|    |              |                                                           |      |      | 1000.03 | 1998.04 | 1997.92 | 75.62  | 2.30E-05 | ELEGHISDLQEDLESER        |
|    |              |                                                           |      |      | 1007.31 | 2012.60 | 2012.04 | 100.39 | 7.70E-08 | TLEAELLQLQEDLAAAER       |
|    |              |                                                           |      |      | 1066.77 | 2131.52 | 2131.00 | 43.65  | 0.037    | QVEAERDELADELASNASGK     |

|    |              |                                                              |      |         |         |         |         |          |                          |                          |
|----|--------------|--------------------------------------------------------------|------|---------|---------|---------|---------|----------|--------------------------|--------------------------|
|    |              |                                                              |      | 1131.02 | 2260.02 | 2259.10 | 76.40   | 1.90E-05 | KQVEAERDELADELASNASGK    |                          |
|    |              |                                                              |      | 895.73  | 2684.15 | 2682.37 | 52.91   | 0.0034   | KLEAESNDLQEIQIADLQAQIADL |                          |
| 46 | gi 47086807  | acyl-Coenzyme A dehydrogenase, very long chain [Danio rerio] | 44.3 | 659     | 836.68  | 1671.35 | 1671.94 | 114.36   | 3.50E-09                 | AIEQFGAVIEELLK           |
| 47 | gi 18858427  | creatine kinase, muscle a [Danio rerio]                      | 45.1 | 381     | 589.71  | 1177.41 | 1175.58 | 37.81    | 0.19                     | DLFDPVISDR               |
|    |              |                                                              |      |         | 755.56  | 1509.10 | 1506.70 | 47.37    | 0.017                    | GGDDLDPNYVLSSR           |
|    |              |                                                              |      |         | 836.18  | 1670.35 | 1670.77 | 59.49    | 0.0011                   | LNYSVDEEYPDLK            |
|    |              |                                                              |      |         | 999.00  | 1995.98 | 1993.93 | 93.47    | 3.80E-07                 | GTGGVDTASVGGVFDISNADR    |
|    |              |                                                              |      |         | 1077.13 | 2152.25 | 2150.04 | 41.65    | 0.057                    | RGTGGVDTASVGGVFDISNADF   |
| 48 | gi 41054435  | hypothetical protein LOC324244 [Danio rerio]                 | 29.4 | 248     | 586.09  | 1170.17 | 1169.67 | 73.35    | 5.00E-05                 | LVILEGELER               |
|    |              |                                                              |      |         | 623.52  | 1245.02 | 1242.65 | 66.73    | 0.00025                  | IQLVEEELDR               |
|    |              |                                                              |      |         | 638.09  | 1274.16 | 1271.65 | 65.71    | 0.00029                  | EKAEGDVAALNR             |
|    |              |                                                              |      |         | 651.07  | 1300.13 | 1297.76 | 59.34    | 0.0012                   | KLVILEGELER              |
| 49 | gi 189517521 | PREDICTED: hypothetical protein [Danio rerio]                | 72   | 143     | 589.05  | 1176.08 | 1173.64 | 42.73    | 0.061                    | IVMGAITDAVGK             |
|    |              |                                                              |      |         | 767.47  | 1532.93 | 1532.73 | 89.40    | 1.20E-06                 | IASQADSIGQEAMGR          |
|    |              |                                                              |      |         | 1869.06 | 1868.05 | 1867.99 | 101.03   | 6.90E-08                 | IDDLLGALSSLSLHATK        |
|    |              |                                                              |      |         | 978.64  | 1955.26 | 1954.97 | 58.28    | 0.0013                   | IYFAHWPDHSLGSAQVK        |
| 50 | gi 31044489  | heat shock 60 kD protein 1 [Danio rerio]                     | 47.8 | 575     | 602.58  | 1203.14 | 1200.63 | 46.52    | 0.025                    | NAGVEGSLVVEK             |
|    |              |                                                              |      |         | 984.90  | 1967.78 | 1967.90 | 75.41    | 2.50E-05                 | VNEIAEQLESTNSDYEK        |
|    |              |                                                              |      |         | 943.10  | 2826.27 | 2825.53 | 118.08   | 1.00E-09                 | TALLDAAGVASLLSTAEAVVTEII |
| 51 | gi 147906978 | hypothetical protein LOC492719 [Danio rerio]                 | 52.6 | 603     | 1359.62 | 1358.61 | 1358.64 | 59.74    | 0.0011                   | EEFAHDHPIK               |
|    |              |                                                              |      |         | 1103.45 | 2204.88 | 2204.05 | 68.40    | 0.00012                  | SHLNHEKEEFAHDHPIK        |
|    |              |                                                              |      |         | 1005.22 | 3012.64 | 3013.43 | 105.12   | 1.90E-08                 | HISDDIFLTTAEAISEMVTEEHLA |
| 52 | gi 50344790  | hypothetical protein LOC415158 [Danio rerio]                 | 79.8 | 104     | 608.49  | 1214.96 | 1214.66 | 57.95    | 0.0019                   | VGPNLWGLFGR              |
|    |              |                                                              |      |         | 744.56  | 1487.11 | 1487.65 | 83.55    | 4.50E-06                 | TGQAEGFSYTDANK           |
|    |              |                                                              |      |         | 808.82  | 1615.63 | 1615.75 | 107.78   | 1.60E-08                 | KTGQAEGFSYTDANK          |
|    |              |                                                              |      |         | 998.19  | 1994.36 | 1992.95 | 50.68    | 0.0073                   | GIVWGEDTLMLEYLENPK       |
| 53 | gi 50344894  | tropomyosin 2 (beta) [Danio rerio]                           | 48.9 | 284     | 537.56  | 1073.11 | 1072.55 | 55.86    | 0.0032                   | LDKENAIDR                |
|    |              |                                                              |      |         | 586.09  | 1170.17 | 1169.67 | 73.35    | 5.00E-05                 | LVILEGELER               |
|    |              |                                                              |      |         | 623.52  | 1245.02 | 1242.65 | 66.73    | 0.00025                  | IQLVEEELDR               |
|    |              |                                                              |      |         | 651.07  | 1300.13 | 1297.76 | 59.34    | 0.0012                   | KLVILEGELER              |
|    |              |                                                              |      |         | 708.64  | 1415.26 | 1415.73 | 37.18    | 0.2                      | DAQEKLEQAEKK             |
| 54 | gi 47086021  | aldolase a, fructose-bisphosphate, b [Danio rerio]           | 48.6 | 364     | 660.17  | 1318.33 | 1317.68 | 104.23   | 4.00E-08                 | GILAADESTGSAK            |
|    |              |                                                              |      |         | 776.51  | 1551.00 | 1550.70 | 71.66    | 6.60E-05                 | FQSINAENTEENR            |
|    |              |                                                              |      |         | 932.72  | 1863.42 | 1862.90 | 38.48    | 0.13                     | RFQSINAENTEENRR          |
|    |              |                                                              |      |         | 1055.50 | 2108.98 | 2107.16 | 65.57    | 0.00023                  | ITPTTPSNLAIENANVLAR      |
|    |              |                                                              |      |         | 1175.04 | 2348.06 | 2347.17 | 73.65    | 3.30E-05                 | GVVPLAGTNGETTTQGLDGLYE   |
| 55 | gi 47086523  | ictacalcin [Danio rerio]                                     | 46.3 | 95      | 696.65  | 1391.29 | 1390.73 | 90.39    | 9.70E-07                 | ELLSAELGDIFGK            |
| 56 | gi 38488731  | natriuretic peptide precursor A [Danio rerio]                | 84   | 106     | 1026.57 | 2051.12 | 2049.99 | 90.71    | 7.10E-07                 | SLLQQFEEALATEEASER       |
|    |              |                                                              |      |         | 1182.38 | 2362.75 | 2362.99 | 76.85    | 1.60E-05                 | DREEAAAPGEDSNPSDGFDTQI   |
|    |              |                                                              |      |         | 1248.96 | 2495.90 | 2495.11 | 43.62    | 0.03                     | AVDYEDSNTVLEQSPSTSWDF    |
| 57 | gi 157787181 | creatine kinase CKM3 [Danio rerio]                           | 47.6 | 380     | 755.56  | 1509.10 | 1506.70 | 47.37    | 0.017                    | GGDDLDPNYVLSSR           |
|    |              |                                                              |      |         | 999.00  | 1995.98 | 1993.93 | 93.47    | 3.80E-07                 | GTGGVDTASVGGVFDISNADR    |
|    |              |                                                              |      |         | 1077.13 | 2152.25 | 2150.04 | 41.65    | 0.057                    | RGTGGVDTASVGGVFDISNADF   |
| 58 | gi 40538764  | ceruloplasmin [Danio rerio]                                  | 29.7 | 1087    | 806.08  | 1610.15 | 1609.72 | 91.54    | 6.70E-07                 | SVNKEDADFQESNK           |
|    |              |                                                              |      |         | 828.99  | 1655.97 | 1654.78 | 85.47    | 2.70E-06                 | LVDDIVSDTFFDNR           |
|    |              |                                                              |      |         | 859.48  | 2575.40 | 2573.23 | 60.57    | 0.00061                  | VSWHLSGLGSETDIHGLYFEGN   |
| 59 | gi 41282154  | aldolase a, fructose-bisphosphate [Danio rerio]              | 58.8 | 364     | 660.17  | 1318.33 | 1317.68 | 104.23   | 4.00E-08                 | GILAADESTGSAK            |
|    |              |                                                              |      |         | 1427.77 | 1426.76 | 1426.72 | 45.39    | 0.028                    | PHAYPFLTPEQK             |
|    |              |                                                              |      |         | 776.51  | 1551.00 | 1550.70 | 71.66    | 6.60E-05                 | FQSINAENTEENR            |
|    |              |                                                              |      |         | 932.72  | 1863.42 | 1862.90 | 38.48    | 0.13                     | RFQSINAENTEENRR          |
|    |              |                                                              |      |         | 1175.04 | 2348.06 | 2347.17 | 73.65    | 3.30E-05                 | GVVPLAGTNGETTTQGLDGLYE   |
| 60 | gi 189535920 | PREDICTED: similar to Filamin-A (Alpha-filamin) (Filamir     | 50.2 | 2523    | 823.47  | 1644.92 | 1645.89 | 81.60    | 6.80E-06                 | VHGPGQLQSGITNKPNK        |

|    |              |                                                                               |      |         |         |         |         |          |                       |                          |
|----|--------------|-------------------------------------------------------------------------------|------|---------|---------|---------|---------|----------|-----------------------|--------------------------|
|    |              |                                                                               |      | 886.49  | 1770.96 | 1770.93 | 63.28   | 0.00045  | SGVELNKPTHFTVNTK      |                          |
|    |              |                                                                               |      | 901.26  | 1800.50 | 1799.96 | 62.58   | 0.00052  | VAKPDITDNKDGTVTVK     |                          |
|    |              |                                                                               |      | 1115.87 | 2229.73 | 2228.05 | 63.53   | 0.00036  | DGSSGVSYIVQEPGDYEVSIK |                          |
|    |              |                                                                               |      | 1206.85 | 2411.68 | 2411.15 | 89.21   | 9.10E-07 | EGPYSINVLYADEEIPQSPYK |                          |
| 61 | gi 41053939  | malate dehydrogenase 1a, NAD (soluble) [Danio rerio]                          | 64.3 | 305     | 662.59  | 1323.17 | 1320.67 | 70.62    | 8.40E-05              | VVDGLSINDFSR             |
|    |              |                                                                               |      |         | 730.42  | 1458.82 | 1459.79 | 53.60    | 0.0044                | EVIPTDKVEVGFK            |
|    |              |                                                                               |      |         | 878.99  | 2633.93 | 2631.29 | 81.11    | 5.40E-06              | NVTIWGNHSSTQYPDVHHAIVTI  |
| 62 | gi 41393131  | dihydrolipoamide S-succinyltransferase [Danio rerio]                          | 34.5 | 458     | 1075.38 | 2148.75 | 2147.07 | 114.26   | 3.20E-09              | AAAYALTDQPAVNAVIDDTTK    |
| 63 | gi 18858959  | lactate dehydrogenase A4 [Danio rerio]                                        | 45   | 333     | 596.12  | 1190.22 | 1188.61 | 84.43    | 4.20E-06              | VIGSGTNLDSAR             |
|    |              |                                                                               |      |         | 628.45  | 1254.88 | 1252.64 | 54.64    | 0.0035                | MVVD SAYEVIK             |
|    |              |                                                                               |      |         | 756.18  | 1510.35 | 1509.77 | 73.74    | 4.00E-05              | IVADKDYSVTANSK           |
| 64 | gi 47086069  | hypothetical protein LOC406529 [Danio rerio]                                  | 47.3 | 283     | 930.98  | 1859.95 | 1858.82 | 94.89    | 3.00E-07              | SQSGVEFTTGGSSNTDTGK      |
|    |              |                                                                               |      |         | 1030.85 | 2059.68 | 2058.12 | 82.00    | 5.30E-06              | VNNASLVGVGYTQSLRPGVK     |
| 65 | gi 41152342  | creatine kinase, mitochondrial 2 (sarcomeric) [Danio rerio]                   | 36.3 | 413     | 1040.87 | 2079.72 | 2079.97 | 91.39    | 6.20E-07              | GTGGVD TAAVGDTFDISNLDR   |
|    |              |                                                                               |      |         | 1119.31 | 2236.61 | 2236.07 | 52.22    | 0.0048                | RGTGGVD TAAVGDTFDISNLDR  |
| 66 | gi 41054193  | hypothetical protein LOC327506 [Danio rerio]                                  | 40.4 | 178     | 1040.87 | 2079.72 | 2079.97 | 91.39    | 6.20E-07              | GTGGVD TAAVGDTFDISNLDR   |
|    |              |                                                                               |      |         | 1119.31 | 2236.61 | 2236.07 | 52.22    | 0.0048                | RGTGGVD TAAVGDTFDISNLDR  |
| 67 | gi 47087061  | glutamic-oxaloacetic transaminase 2a, mitochondrial (aspartate) [Danio rerio] | 44.2 | 428     | 555.50  | 1108.99 | 1107.59 | 39.28    | 0.12                  | KMNLGVGAYR               |
|    |              |                                                                               |      |         | 705.68  | 1409.35 | 1408.72 | 46.27    | 0.023                 | EYLP IGG LADFSK          |
|    |              |                                                                               |      |         | 724.76  | 1447.51 | 1445.81 | 72.14    | 6.30E-05              | IAATILNTPELYK            |
|    |              |                                                                               |      |         | 946.71  | 1891.41 | 1893.02 | 95.60    | 2.40E-07              | KLDKEYLP IGG LADFSK      |
|    |              |                                                                               |      |         | 666.36  | 1996.04 | 1994.03 | 36.92    | 0.17                  | YFIEQGHNILLSQSF AK       |
|    |              |                                                                               |      |         | 784.38  | 2350.11 | 2350.26 | 58.13    | 0.0012                | ISVAGVTSANVEYLAHAIHAVTK  |
| 68 | gi 50539808  | hypothetical protein LOC436647 [Danio rerio]                                  | 41.3 | 525     | 908.92  | 1815.83 | 1815.92 | 76.41    | 2.10E-05              | ENTLNQLVGAAFGAAGQR       |
|    |              |                                                                               |      |         | 967.82  | 1933.62 | 1932.99 | 63.67    | 0.00037               | VNAGDQPGADVGLISPQAK      |
|    |              |                                                                               |      |         | 1005.87 | 2009.73 | 2009.00 | 85.54    | 2.30E-06              | SSQWLDIHN PATSEVIGR      |
| 69 | gi 47085773  | glutamic-oxaloacetic transaminase 1, soluble [Danio rerio]                    | 51.2 | 410     | 538.75  | 1075.48 | 1075.61 | 66.82    | 0.00025               | KVNLGVGAYR               |
|    |              |                                                                               |      |         | 1113.61 | 1112.60 | 1112.61 | 43.19    | 0.053                 | IALGEDSPA I K            |
|    |              |                                                                               |      |         | 845.28  | 1688.54 | 1687.84 | 84.95    | 3.20E-06              | NIDYVAESIHEAVTK          |
|    |              |                                                                               |      |         | 861.05  | 2580.13 | 2579.28 | 45.87    | 0.018                 | MIADDHSLNHEYLP I LGLPEFR |
| 70 | gi 68362804  | PREDICTED: similar to Histone H4 replacement CG3379 [Danio rerio]             | 73.8 | 103     | 1134.59 | 1133.58 | 1133.54 | 39.08    | 0.14                  | DAV TYTEHAK              |
|    |              |                                                                               |      |         | 591.69  | 1181.36 | 1179.61 | 63.27    | 0.00047               | ISGLIYEETR               |
|    |              |                                                                               |      |         | 657.23  | 1312.44 | 1309.70 | 58.02    | 0.0016                | TVTAMDVVYALK             |
|    |              |                                                                               |      |         | 664.19  | 1326.36 | 1324.75 | 43.50    | 0.044                 | DNIQGITKPAIR             |
| 71 | gi 41053873  | succinate dehydrogenase complex, subunit A, flavoprotein [Danio rerio]        | 49.2 | 661     | 666.56  | 1331.11 | 1329.65 | 45.28    | 0.031                 | GEGGILINSEGER            |
|    |              |                                                                               |      |         | 1474.80 | 1473.79 | 1473.75 | 85.53    | 2.90E-06              | KHTLSYVDPETGK            |
|    |              |                                                                               |      |         | 704.36  | 2110.06 | 2109.13 | 36.94    | 0.17                  | DHVHLQLHHLPPQQLAAR       |
|    |              |                                                                               |      |         | 861.14  | 2580.40 | 2582.14 | 47.38    | 0.013                 | DGQDHVVPGLYACGEAGCASV    |
|    |              |                                                                               |      |         | 888.37  | 2662.07 | 2662.42 | 51.70    | 0.0047                | GVGPKDHDVHLQLHHLPPQQLAAR |
| 72 | gi 23308625  | fatty acid binding protein 3, muscle and heart [Danio rerio]                  | 39.1 | 133     | 749.12  | 1496.23 | 1496.63 | 92.69    | 5.00E-07              | LGEEFDETTADDR            |
|    |              |                                                                               |      |         | 813.60  | 1625.18 | 1624.72 | 56.89    | 0.0019                | LGEEFDETTADDRK           |
|    |              |                                                                               |      |         | 1081.42 | 2160.82 | 2160.13 | 62.50    | 0.00047               | EVSDNNLTLTTLGDIVSTR      |
| 73 | gi 58801524  | LIM domain containing preferred translocation partner in [Danio rerio]        | 63.1 | 556     | 1097.90 | 2193.79 | 2193.06 | 52.39    | 0.0047                | AEP SHHPAPTPSQQGYQPAPPK  |
|    |              |                                                                               |      |         | 1397.62 | 2793.23 | 2793.39 | 108.68   | 9.00E-09              | SSLDAEIDSLTSILADLESSSPYK |
| 74 | gi 189535578 | PREDICTED: fetuin B [Danio rerio]                                             | 35.9 | 498     | 1053.80 | 2105.59 | 2104.92 | 74.74    | 2.90E-05              | DETHEHDHEIVLDHDHK        |
|    |              |                                                                               |      |         | 1117.31 | 2232.61 | 2233.01 | 77.52    | 1.40E-05              | KDETHEHDHEIVLDHDHK       |
|    |              |                                                                               |      |         | 797.16  | 2388.45 | 2389.01 | 42.74    | 0.039                 | AHEHGQDEWEHQHHQYGHK      |
| 75 | gi 66773138  | cytochrome c oxidase subunit Vaa [Danio rerio]                                | 83.7 | 141     | 487.46  | 972.90  | 972.52  | 66.23    | 0.0003                | LDDLASAIR                |
|    |              |                                                                               |      |         | 487.46  | 1459.36 | 1458.77 | 41.65    | 0.069                 | ACRRLDDLASAIR            |
|    |              |                                                                               |      |         | 1659.34 | 3316.67 | 3313.73 | 65.34    | 0.00015               | EIYPYVIQELRPTLDELGIATPEE |
|    |              |                                                                               |      |         | 1694.78 | 3387.54 | 3384.77 | 59.62    | 0.00055               | EIYPYVIQELRPTLDELGIATPEE |
| 76 | gi 41055718  | fumarate hydratase precursor [Danio rerio]                                    | 50.7 | 509     | 829.24  | 1656.46 | 1655.84 | 48.58    | 0.013                 | LGSKDPVHPNDHVNK          |

|    |              |                                                            |      |         |         |         |         |          |                                  |                        |
|----|--------------|------------------------------------------------------------|------|---------|---------|---------|---------|----------|----------------------------------|------------------------|
|    |              |                                                            |      | 719.09  | 2154.25 | 2153.18 | 65.75   | 0.00022  | EVHEVLLPGLQTLHDALAAK             |                        |
| 77 | gi 189516653 | PREDICTED: myosin, heavy chain 9, non-muscle like-1,       | 30.3 | 1754    | 1251.94 | 2501.87 | 2501.26 | 85.96    | 1.80E-06 THTQDAVPLSLGQEFGGYVQQV  |                        |
|    |              |                                                            |      | 569.07  | 1136.13 | 1135.60 | 36.18   | 0.25     | VLQEQGTHPK                       |                        |
|    |              |                                                            |      | 613.09  | 1224.17 | 1222.63 | 64.72   | 0.00033  | AGVLAHLEEER                      |                        |
|    |              |                                                            |      | 575.27  | 1722.79 | 1721.89 | 60.94   | 0.00077  | KQELEEILHDLEAR                   |                        |
|    |              |                                                            |      | 864.56  | 1727.10 | 1725.94 | 69.31   | 0.00011  | QLLQANPILEAFGNAK                 |                        |
| 78 | gi 47777298  | inner membrane protein, mitochondrial (mitofilin) [Danio r | 39.2 | 757     | 893.88  | 2678.62 | 2678.38 | 79.43    | 7.80E-06 KLEGDSTELHDQIAELQAQIAEL |                        |
|    |              |                                                            |      | 740.20  | 1478.39 | 1478.76 | 78.83   | 1.30E-05 | IVSQYSELVNEAK                    |                        |
|    |              |                                                            |      | 978.64  | 1955.26 | 1955.09 | 67.25   | 0.00016  | KPETVKPLQISSLSEATK               |                        |
|    |              |                                                            |      | 1065.82 | 2129.63 | 2130.11 | 49.26   | 0.01     | AELDALAALTAGLEETLGSSAK           |                        |
| 79 | gi 18858281  | apolipoprotein A-I [Danio rerio]                           | 55   | 262     | 585.45  | 1168.88 | 1166.55 | 57.61    | 0.0018                           | AFESNIEETK             |
|    |              |                                                            |      | 822.74  | 1643.47 | 1643.73 | 81.96   | 6.20E-06 | ALDNLGTDYEYK                     |                        |
|    |              |                                                            |      | 912.03  | 1822.04 | 1821.93 | 58.57   | 0.0012   | EKLEPVFQEYSALNR                  |                        |
|    |              |                                                            |      | 1580.96 | 3159.90 | 3159.53 | 45.88   | 0.015    | LQEYAQTTSQALTPYAETISTQL          |                        |
| 80 | gi 57222259  | talin 1 [Danio rerio]                                      | 52.6 | 2538    | 1526.50 | 3050.98 | 3050.51 | 110.47   | 5.30E-09                         | GTEWVDPEDPTVIAENELLGAA |
|    |              |                                                            |      | 1588.48 | 3174.95 | 3174.57 | 84.08   | 2.30E-06 | EAVDDLGSTLAEVASAAGAVGC           |                        |
| 81 | gi 8395615   | cytochrome c oxidase subunit II [Danio rerio]              | 11.7 | 230     | 442.31  | 882.61  | 882.46  | 41.11    | 0.072                            | LLETDHR                |
|    |              |                                                            |      | 712.46  | 2134.35 | 2133.18 | 59.60   | 0.00091  | ILVSAEDVLHSAWVPSLGIK             |                        |
| 82 | gi 56693297  | hypothetical protein LOC494070 [Danio rerio]               | 44   | 182     | 952.64  | 1903.26 | 1902.91 | 92.17    | 5.30E-07                         | AKEELEQELADKEDEK       |
| 83 | gi 56090150  | NADH dehydrogenase (ubiquinone) Fe-S protein 1 [Danio      | 46.9 | 731     | 805.71  | 1609.40 | 1607.78 | 75.77    | 2.50E-05                         | FASEVAGVEDLGTTGR       |
|    |              |                                                            |      | 1571.20 | 3140.38 | 3139.56 | 89.52   | 6.40E-07 | DSFIVYQGHGHDVGAPIADVILP          |                        |
| 84 | gi 117606264 | sarcalumenin [Danio rerio]                                 | 39.4 | 482     | 869.43  | 1736.85 | 1735.95 | 50.99    | 0.0074                           | AITHELPSLLGSINSKG      |
|    |              |                                                            |      | 1036.37 | 2070.72 | 2069.08 | 87.62   | 1.50E-06 | REEISLLEDLNQVIENR                |                        |
| 85 | gi 189517523 | PREDICTED: hypothetical protein [Danio rerio]              | 59.9 | 147     | 1060.96 | 1059.95 | 1060.52 | 40.46    | 0.11                             | LNVDPDFNK              |
|    |              |                                                            |      | 714.17  | 1426.32 | 1424.76 | 90.93   | 7.90E-07 | INVDEIGPQTLAR                    |                        |
| 86 | gi 189530625 | PREDICTED: similar to spectrin repeat containing, nucle:   | 35   | 8621    | 550.57  | 1099.13 | 1097.66 | 68.83    | 0.00015                          | QLADAIAKLR             |
| 87 | gi 113195582 | hypothetical protein LOC556489 [Danio rerio]               | 54.9 | 226     | 724.23  | 1446.44 | 1445.78 | 47.73    | 0.018                            | VIFEAEOTEKPGVK         |
|    |              |                                                            |      | 881.46  | 2641.36 | 2641.29 | 69.67   | 7.30E-05 | SPDPAAVEHKPEESKPEESKPE           |                        |
|    |              |                                                            |      | 1421.57 | 2841.12 | 2840.42 | 49.82   | 0.0068   | AKSPDPAAVEHKPEESKPEESK           |                        |
| 88 | gi 47271422  | triosephosphate isomerase 1b [Danio rerio]                 | 65.3 | 248     | 695.75  | 1389.49 | 1388.71 | 69.76    | 0.00011                          | SIEELANTLNSAK          |
|    |              |                                                            |      | 1458.82 | 1457.81 | 1457.72 | 75.26   | 3.00E-05 | HVFGESDELIGQK                    |                        |
|    |              |                                                            |      | 808.43  | 1614.84 | 1613.82 | 57.16   | 0.0019   | RHVFGESDELIGQK                   |                        |
|    |              |                                                            |      | 812.06  | 2433.15 | 2431.30 | 52.48   | 0.0041   | DLDGFLVGGASLKPEFIDIINAK          |                        |
| 89 | gi 47550793  | nicotinamide nucleotide transhydrogenase [Danio rerio]     | 36.4 | 1079    | 1270.68 | 1269.67 | 1269.68 | 49.62    | 0.011                            | SLGAEPLEVDIK           |
|    |              |                                                            |      | 707.79  | 1413.56 | 1412.74 | 41.33   | 0.073    | GVIHVGYTDIPSR                    |                        |
|    |              |                                                            |      | 789.81  | 1577.60 | 1577.77 | 66.87   | 0.0002   | QGFNVVVESEGAGESAK                |                        |
|    |              |                                                            |      | 922.38  | 2764.11 | 2763.39 | 47.00   | 0.013    | DGSVVVDLAAEAGGNIETTVP            |                        |
| 90 | gi 41152400  | peptidylprolyl isomerase A, like [Danio rerio]             | 68.9 | 164     | 686.63  | 1371.24 | 1370.73 | 82.70    | 5.50E-06                         | VVDGLDVVDAIEK          |
| 91 | gi 52219194  | fatty acid binding protein 11 [Danio rerio]                | 23.9 | 134     | 769.06  | 1536.10 | 1535.67 | 89.09    | 1.20E-06                         | LNEPFEETTADDR          |
|    |              |                                                            |      | 833.41  | 1664.80 | 1663.77 | 68.69   | 0.00013  | LNEPFEETTADDRK                   |                        |
| 92 | gi 114326248 | elastin b [Danio rerio]                                    | 21.6 | 2054    | 880.55  | 1759.08 | 1759.92 | 38.98    | 0.12                             | SYGGAGSLGAGGILPGTGIR   |
|    |              |                                                            |      | 887.73  | 1773.45 | 1772.86 | 55.25   | 0.0029   | SYGGAGALGGAGQGGIGGGPGC           |                        |
|    |              |                                                            |      | 1647.81 | 4940.40 | 4937.47 | 122.27  | 1.40E-10 | LGVGPGGAGGIGGGGLGVGPGG           |                        |
| 93 | gi 71834286  | hypothetical protein LOC321166 [Danio rerio]               | 37.6 | 3730    | 638.85  | 1275.69 | 1273.71 | 40.14    | 0.11                             | SKVEEILSELK            |
|    |              |                                                            |      | 967.82  | 1933.62 | 1931.96 | 84.94   | 2.80E-06 | TLHLDDSIDSVHPIQDK                |                        |
|    |              |                                                            |      | 1036.40 | 3106.17 | 3105.49 | 46.59   | 0.013    | YDAEEIEAEVSSDVTTEIHNIITTI        |                        |
| 94 | gi 41055728  | ATPase, Ca++ transporting, cardiac muscle, slow twitch :   | 38.8 | 996     | 1072.60 | 1071.59 | 1071.56 | 41.86    | 0.079                            | NAENAIEALK             |
|    |              |                                                            |      | 732.73  | 1463.44 | 1463.67 | 45.15   | 0.03     | IRDEMASTEQER                     |                        |
|    |              |                                                            |      | 1525.55 | 1524.54 | 1524.80 | 83.44   | 4.30E-06 | DIVPGDIVEVAVGDK                  |                        |
|    |              |                                                            |      | 788.74  | 1575.47 | 1573.86 | 86.36   | 2.40E-06 | VDQSILTGESVSVIK                  |                        |
| 95 | gi 71892474  | ATPase, Ca++ transporting, cardiac muscle, slow twitch :   | 28.7 | 1035    | 1072.60 | 1071.59 | 1071.56 | 41.86    | 0.079                            | NAENAIEALK             |
|    |              |                                                            |      | 732.73  | 1463.44 | 1463.67 | 45.15   | 0.03     | IRDEMASTEQER                     |                        |

|     |              |                                                         |      |         |         |         |         |          |                 |                          |
|-----|--------------|---------------------------------------------------------|------|---------|---------|---------|---------|----------|-----------------|--------------------------|
|     |              |                                                         |      | 1525.55 | 1524.54 | 1524.80 | 83.44   | 4.30E-06 | DIVPGDIVEVAVGDK |                          |
|     |              |                                                         |      | 788.74  | 1575.47 | 1573.86 | 86.36   | 2.40E-06 | VDQSILTGESVSVIK |                          |
| 96  | gi 50540008  | zgc:92882 [Danio rerio]                                 | 60.8 | 334     | 474.43  | 946.84  | 946.60  | 41.19    | 0.093           | HIIPQIVK                 |
|     |              |                                                         |      |         | 596.12  | 1190.22 | 1188.61 | 84.43    | 4.20E-06        | VIGSGTNLDSAR             |
| 97  | gi 189537196 | PREDICTED: similar to L-lactate dehydrogenase B chain   | 52.3 | 285     | 474.43  | 946.84  | 946.60  | 41.19    | 0.093           | HIIPQIVK                 |
|     |              |                                                         |      |         | 596.12  | 1190.22 | 1188.61 | 84.43    | 4.20E-06        | VIGSGTNLDSAR             |
| 98  | gi 189520789 | PREDICTED: si:ch211-239j9.2 [Danio rerio]               | 68.4 | 76      | 675.31  | 1348.61 | 1348.63 | 71.30    | 7.50E-05        | EAGIFESARPSGE            |
|     |              |                                                         |      |         | 787.29  | 1572.56 | 1571.68 | 64.31    | 0.00038         | AYADFYTQYDSTK            |
| 99  | gi 51571925  | hypothetical protein LOC445486 [Danio rerio]            | 36.1 | 194     | 902.32  | 1802.62 | 1800.95 | 39.68    | 0.1             | INSELPVDEVFAIVEK         |
|     |              |                                                         |      |         | 966.43  | 1930.84 | 1929.05 | 82.64    | 4.70E-06        | KINSELPVDEVFAIVEK        |
| 100 | gi 166795887 | vitellogenin 1 [Danio rerio]                            | 43.8 | 1362    | 481.12  | 960.22  | 959.47  | 36.63    | 0.28            | LEVEWER                  |
|     |              |                                                         |      |         | 587.65  | 1173.29 | 1172.62 | 56.41    | 0.0027          | LEFEVQVGPR               |
|     |              |                                                         |      |         | 590.06  | 1178.11 | 1176.64 | 48.71    | 0.015           | QTLAFVEIEK               |
|     |              |                                                         |      |         | 644.61  | 1287.21 | 1286.66 | 65.73    | 0.00029         | AEAGVLGEFPAAR            |
|     |              |                                                         |      |         | 692.52  | 1383.03 | 1381.78 | 54.77    | 0.0034          | ISDAPAQIVEVLK            |
| 101 | gi 68433600  | PREDICTED: similar to LOC495046 protein isoform 1 [D:   | 34.6 | 1056    | 1072.60 | 1071.59 | 1071.56 | 41.86    | 0.079           | NAENAIEALK               |
|     |              |                                                         |      |         | 1525.55 | 1524.54 | 1524.80 | 83.44    | 4.30E-06        | DIVPGDIVEVAVGDK          |
|     |              |                                                         |      |         | 788.74  | 1575.47 | 1573.86 | 86.36    | 2.40E-06        | VDQSILTGESVSVLK          |
| 102 | gi 136429    | Trypsin precursor                                       | 63.4 | 232     | 737.53  | 2209.57 | 2210.10 | 85.13    | 2.50E-06        | LGEHNIDVLEGNEQFINAAK     |
| 103 | gi 50345022  | small muscle protein, X-linked [Danio rerio]            | 61.4 | 83      | 1037.75 | 2073.48 | 2072.97 | 83.71    | 3.70E-06        | REDTVETEEVSPVTPEEK       |
|     |              |                                                         |      |         | 1115.86 | 2229.71 | 2229.08 | 60.21    | 0.00077         | RREDTVETEEVSPVTPEEK      |
| 104 | gi 18859505  | alpha-tropomyosin [Danio rerio]                         | 35.6 | 284     | 537.56  | 1073.11 | 1072.55 | 55.86    | 0.0032          | LDKENALDR                |
|     |              |                                                         |      |         | 623.52  | 1245.02 | 1242.65 | 66.73    | 0.00025         | IQLVEEELDR               |
|     |              |                                                         |      |         | 770.15  | 2307.42 | 2307.18 | 51.55    | 0.0055          | SVAKLEKTIDDLEDELYAQK     |
| 105 | gi 160333682 | heat shock protein 8 [Danio rerio]                      | 56.2 | 649     | 830.76  | 1659.50 | 1658.89 | 82.21    | 5.90E-06        | IINEPTAAAIAYGLDK         |
|     |              |                                                         |      |         | 847.03  | 1692.05 | 1690.72 | 44.48    | 0.035           | STAGDTHLGGEDFDNR         |
|     |              |                                                         |      |         | 887.36  | 1772.70 | 1772.81 | 39.80    | 0.1             | NQTAEREEFEHQK            |
|     |              |                                                         |      |         | 1131.58 | 2261.14 | 2259.14 | 47.52    | 0.014           | SINPDEAVAYGAAVQAAILSGDK  |
| 106 | gi 148922875 | hypothetical protein LOC567716 [Danio rerio]            | 26.3 | 331     | 969.31  | 1936.60 | 1936.93 | 83.84    | 3.60E-06        | HLTTLVDDIWYYAGDR         |
| 107 | gi 32308153  | annexin A2a [Danio rerio]                               | 27   | 337     | 633.21  | 1264.40 | 1263.66 | 53.64    | 0.0045          | SLHQITIAEHTK             |
|     |              |                                                         |      |         | 723.17  | 1444.33 | 1443.78 | 90.36    | 9.60E-07        | GVDEQTIIDILTK            |
| 108 | gi 18858299  | ATPase, Na+/K+ transporting, alpha 1a.3 polypeptide [D: | 35.5 | 1024    | 877.83  | 1753.65 | 1751.85 | 85.52    | 2.60E-06        | DAFQNAVYELGGLGER         |
|     |              |                                                         |      |         | 906.81  | 1811.60 | 1810.94 | 74.81    | 3.00E-05        | QGAIVAVTGDGVNDSPALK      |
| 109 | gi 18858295  | ATPase, Na+/K+ transporting, alpha 1 polypeptide [Danic | 35   | 1028    | 877.83  | 1753.65 | 1751.85 | 85.52    | 2.60E-06        | DAFQNAVYELGGLGER         |
|     |              |                                                         |      |         | 906.81  | 1811.60 | 1810.94 | 74.81    | 3.00E-05        | QGAIVAVTGDGVNDSPALK      |
| 110 | gi 189540222 | PREDICTED: similar to myosin, heavy polypeptide 2, fas: | 43.1 | 950     | 745.59  | 1489.17 | 1488.74 | 49.21    | 0.012           | ENQSVLITGESGAGK          |
|     |              |                                                         |      |         | 1183.60 | 2365.19 | 2366.12 | 87.76    | 1.30E-06        | LQQFFNHHMFVLEQEEYK       |
| 111 | gi 189540214 | PREDICTED: similar to myosin heavy chain, partial [Dani | 41   | 809     | 745.59  | 1489.17 | 1488.74 | 49.21    | 0.012           | ENQSVLITGESGAGK          |
|     |              |                                                         |      |         | 1183.60 | 2365.19 | 2366.12 | 87.76    | 1.30E-06        | LQQFFNHHMFVLEQEEYK       |
| 112 | gi 54400442  | hypothetical protein LOC449795 [Danio rerio]            | 55.4 | 202     | 998.94  | 2993.79 | 2996.41 | 52.99    | 0.003           | TLAAGSHAEHDGQPYCHKPCY/   |
|     |              |                                                         |      |         | 1008.39 | 3022.14 | 3023.42 | 68.79    | 7.90E-05        | TLNPGGHAHDGKPYCHKPCY/    |
| 113 | gi 156713467 | vitellogenin 7 [Danio rerio]                            | 49.4 | 1358    | 481.12  | 960.22  | 959.47  | 36.63    | 0.28            | LEVEWER                  |
|     |              |                                                         |      |         | 587.65  | 1173.29 | 1172.62 | 56.41    | 0.0027          | LEFEVQVGPR               |
|     |              |                                                         |      |         | 590.06  | 1178.11 | 1176.64 | 48.71    | 0.015           | QTLAFVEIEK               |
|     |              |                                                         |      |         | 644.61  | 1287.21 | 1286.66 | 65.73    | 0.00029         | AEAGVLGEFPAAR            |
| 114 | gi 189516972 | PREDICTED: similar to Myosin light polypeptide 4 (Myos  | 37.4 | 187     | 968.51  | 967.50  | 966.55  | 60.55    | 0.00082         | HVLATLGEK                |
|     |              |                                                         |      |         | 757.12  | 1512.23 | 1511.69 | 84.28    | 3.50E-06        | DQGTDFDFVEGLR            |
| 115 | gi 46358344  | isocitrate dehydrogenase 3 (NAD+) alpha [Danio rerio]   | 40.5 | 365     | 1251.43 | 2500.84 | 2501.23 | 114.90   | 2.30E-09        | ENTEGEYSGLIEHVIVDGVVQSIK |
| 116 | gi 119943123 | apolipoprotein A-IV [Danio rerio]                       | 62.7 | 255     | 903.92  | 1805.82 | 1802.94 | 78.36    | 1.40E-05        | AQIVQQSLTPYAEDLK         |
| 117 | gi 189526598 | PREDICTED: similar to COASTER [Danio rerio]             | 35.3 | 916     | 657.65  | 1313.29 | 1312.78 | 53.16    | 0.005           | QAVALSLEARK              |
| 118 | gi 45387763  | hypothetical protein LOC402975 [Danio rerio]            | 43.3 | 284     | 623.52  | 1245.02 | 1242.65 | 66.73    | 0.00025         | IQLVEEELDR               |
|     |              |                                                         |      |         | 770.15  | 2307.42 | 2307.18 | 51.55    | 0.0055          | SVAKLEKTIDDLEDELYAQK     |



|     |              |                                                               |      |      |         |         |         |        |          |                          |
|-----|--------------|---------------------------------------------------------------|------|------|---------|---------|---------|--------|----------|--------------------------|
| 119 | gi 47086247  | proto galectin Gal1-L2 [Danio rerio]                          | 40.3 | 134  | 892.64  | 2674.90 | 2675.32 | 93.26  | 3.30E-07 | ITFTNEEFLVTLPDGSEIHFPNR  |
| 120 | gi 189528827 | PREDICTED: similar to LOC567732 protein [Danio rerio]         | 39.6 | 1368 | 1212.43 | 2422.84 | 2422.19 | 114.22 | 2.80E-09 | GQNHLEEVELAFQNVIEGSGR    |
| 121 | gi 41055614  | hypothetical protein LOC393478 [Danio rerio]                  | 37.2 | 86   | 733.58  | 1465.15 | 1464.65 | 91.10  | 7.40E-07 | WDSQIEDGSFPGK            |
| 122 | gi 56118753  | troponin C, slow [Danio rerio]                                | 37.9 | 161  | 602.42  | 1202.83 | 1202.58 | 56.98  | 0.0022   | AAAEQLTDEQK              |
|     |              |                                                               |      |      | 684.15  | 1366.28 | 1364.65 | 68.52  | 0.00013  | NADGYIDLDELK             |
|     |              |                                                               |      |      | 726.33  | 1450.65 | 1448.65 | 60.34  | 0.0009   | IDYDEFLEFMK              |
| 123 | gi 189529657 | PREDICTED: similar to nonmuscle myosin heavy chain [          | 34.9 | 1962 | 613.09  | 1224.17 | 1222.63 | 64.72  | 0.00033  | AGVLAHLEEER              |
|     |              |                                                               |      |      | 864.56  | 1727.10 | 1725.94 | 69.31  | 0.00011  | QLLQANPILEAFGNAK         |
| 124 | gi 70778808  | vesicle amine transport protein 1 [Danio rerio]               | 33.3 | 484  | 904.66  | 1807.30 | 1806.90 | 75.89  | 2.40E-05 | HEVISQGGVTHPIDYR         |
| 125 | gi 18859423  | spectrin, beta, erythrocytic [Danio rerio]                    | 29.6 | 2357 | 669.07  | 1336.13 | 1335.74 | 59.62  | 0.0011   | HLLEVEDLLQK              |
|     |              |                                                               |      |      | 713.72  | 1425.42 | 1425.74 | 42.84  | 0.05     | HRPDLVDYGNLK             |
|     |              |                                                               |      |      | 945.11  | 1888.20 | 1887.93 | 88.71  | 1.20E-06 | KKHDAIETDIAAYEER         |
| 126 | gi 189531406 | PREDICTED: similar to nicotinamide nucleotide transhyd        | 40.4 | 679  | 567.07  | 1132.13 | 1130.59 | 54.85  | 0.0038   | SVAELEAEKR               |
|     |              |                                                               |      |      | 649.69  | 1297.36 | 1296.77 | 64.75  | 0.00033  | VSVSPAGVELLVK            |
|     |              |                                                               |      |      | 1771.82 | 3541.62 | 3538.84 | 66.53  | 0.00011  | VHEAELLSPGSTLVSFIYPAQNP  |
| 127 | gi 41055387  | hypothetical protein LOC393586 [Danio rerio]                  | 48.4 | 647  | 830.76  | 1659.50 | 1658.89 | 82.21  | 5.90E-06 | IINEPTAAAIAYGLDK         |
|     |              |                                                               |      |      | 847.03  | 1692.05 | 1690.72 | 44.48  | 0.035    | STAGDTHLGGEDFDNR         |
| 128 | gi 41386743  | eukaryotic translation elongation factor 2, like [Danio reric | 56.4 | 858  | 703.70  | 1405.38 | 1404.80 | 59.08  | 0.0013   | TFAQLILDPIFK             |
|     |              |                                                               |      |      | 1073.30 | 2144.58 | 2144.05 | 65.62  | 0.00023  | ARPPFDGLAEDIDKGDVSSR     |
| 129 | gi 47086479  | solute carrier family 25 (mitochondrial carrier, Aralar), me  | 33.9 | 682  | 1325.55 | 1324.54 | 1324.74 | 84.55  | 3.40E-06 | TVHLLAGVADTTK            |
|     |              |                                                               |      |      | 677.29  | 1352.56 | 1352.69 | 36.67  | 0.2      | SSGISTIHPEPK             |
|     |              |                                                               |      |      | 979.83  | 1957.64 | 1956.00 | 38.79  | 0.12     | IAPLEEGSLPYNVAEAQR       |
| 130 | gi 49274617  | tropomyosin 1 alpha [Danio rerio]                             | 33.5 | 284  | 537.56  | 1073.11 | 1072.55 | 55.86  | 0.0032   | LDKENALDR                |
|     |              |                                                               |      |      | 623.52  | 1245.02 | 1242.65 | 66.73  | 0.00025  | IQLVEEELDR               |
| 131 | gi 189522028 | PREDICTED: similar to myomesin [Danio rerio]                  | 61.5 | 923  | 1508.67 | 1507.66 | 1507.73 | 82.72  | 5.00E-06 | FKGEFDESPLSPR            |
|     |              |                                                               |      |      | 1259.63 | 3775.87 | 3772.95 | 53.75  | 0.0018   | GASAPWTGQIIVTEEEPVEGVVI  |
|     |              |                                                               |      |      | 1301.58 | 3901.72 | 3901.05 | 47.40  | 0.0073   | KGASAPWTGQIIVTEEEPVEGVV  |
| 132 | gi 55925387  | carnitine palmitoyltransferase II [Danio rerio]               | 37.9 | 668  | 816.40  | 1630.78 | 1631.90 | 43.55  | 0.045    | DGNLIKPAEVQAHLK          |
|     |              |                                                               |      |      | 1128.50 | 2254.98 | 2252.11 | 37.68  | 0.14     | YLAAQRPLLNDEQYSNTEK      |
|     |              |                                                               |      |      | 1194.52 | 2387.02 | 2384.18 | 59.47  | 0.00084  | DTTEKPLVGPQSPASVDSSSA    |
| 133 | gi 30410758  | keratin 18 [Danio rerio]                                      | 34.8 | 431  | 843.64  | 1685.27 | 1683.84 | 107.62 | 1.70E-08 | NQISQSGVQVDVDPAK         |
| 134 | gi 41152346  | hypothetical protein LOC393668 [Danio rerio]                  | 43   | 433  | 573.42  | 1144.82 | 1142.61 | 42.17  | 0.07     | IGAEVYHNLK               |
|     |              |                                                               |      |      | 1008.42 | 3022.23 | 3020.58 | 72.22  | 3.60E-05 | HIADLAGNPEVILPVPAFNVINGC |
| 135 | gi 189517055 | PREDICTED: similar to heat shock protein 8 [Danio rerio]      | 42.6 | 698  | 830.76  | 1659.50 | 1658.89 | 82.21  | 5.90E-06 | IINEPTAAAIAYGLDK         |
| 136 | gi 41053611  | hypothetical protein LOC393828 [Danio rerio]                  | 55.4 | 213  | 1602.92 | 3203.82 | 3202.41 | 103.90 | 2.40E-08 | YTFESIQNEANALFNNENQANAI  |
| 137 | gi 47086533  | 2-peptidylprolyl isomerase A [Danio rerio]                    | 57.3 | 164  | 820.21  | 1638.40 | 1637.91 | 103.88 | 3.90E-08 | HVVFGQVVEGLDVIK          |
| 138 | gi 160420306 | hypothetical protein LOC678536 [Danio rerio]                  | 46.2 | 1358 | 481.12  | 960.22  | 959.47  | 36.63  | 0.28     | LEVEWER                  |
|     |              |                                                               |      |      | 587.65  | 1173.29 | 1172.62 | 56.41  | 0.0027   | LEFEVQVGPR               |
|     |              |                                                               |      |      | 590.06  | 1178.11 | 1176.64 | 48.71  | 0.015    | QTLAFVEIEK               |
|     |              |                                                               |      |      | 692.52  | 1383.03 | 1381.78 | 54.77  | 0.0034   | ISDAPAQIVEVLK            |
| 139 | gi 48762665  | ubiquinol-cytochrome c reductase core protein II [Danio r     | 56.6 | 454  | 1245.76 | 1244.75 | 1244.68 | 78.80  | 1.50E-05 | KVDFAAAGEPLK             |
|     |              |                                                               |      |      | 693.59  | 1385.16 | 1385.75 | 63.33  | 0.00049  | INAVSSADVNVAK            |
| 140 | gi 52219050  | hypothetical protein LOC447859 [Danio rerio]                  | 58.3 | 617  | 701.31  | 1400.60 | 1400.70 | 64.79  | 0.00034  | HSGSDYAQLKPAK            |
|     |              |                                                               |      |      | 928.87  | 2783.58 | 2782.39 | 77.52  | 1.20E-05 | ITDENLQSQTGLYIPEYEEALKI  |
| 141 | gi 70778734  | ATPase, Na+/K+ transporting, alpha 3b polypeptide [Dan        | 35.7 | 1023 | 906.81  | 1811.60 | 1810.94 | 74.81  | 3.00E-05 | QGAIVAVTGDGVNDSPALK      |
|     |              |                                                               |      |      | 924.65  | 1847.29 | 1846.81 | 64.13  | 0.00035  | YQLSIHETEDNNDNR          |
| 142 | gi 47174755  | myosin light chain alkali, smooth-muscle isoform [Danio r     | 48.3 | 151  | 757.12  | 1512.23 | 1511.69 | 84.28  | 3.50E-06 | DQGTFFDFVEGLR            |
| 143 | gi 113678245 | hypothetical protein LOC558738 [Danio rerio]                  | 57.7 | 111  | 845.40  | 1688.79 | 1689.84 | 97.41  | 1.80E-07 | IEFSPLDAWNSGVQK          |
| 144 | gi 38198639  | TAR DNA binding protein, like [Danio rerio]                   | 14.5 | 303  | 846.16  | 1690.31 | 1688.83 | 72.42  | 5.80E-05 | HNNIHHLFSNFPGR           |
| 145 | gi 150378483 | heat shock protein, alpha-crystallin-related, b11 [Danio re   | 31.2 | 205  | 1113.54 | 2225.06 | 2223.99 | 95.53  | 2.30E-07 | NPALQNSEPENQAVEAEEAEN    |
| 146 | gi 41393141  | tropomyosin 3 [Danio rerio]                                   | 28.2 | 248  | 623.52  | 1245.02 | 1242.65 | 66.73  | 0.00025  | IQLVEEELDR               |
| 147 | gi 47085999  | hypothetical protein LOC406484 [Danio rerio]                  | 41   | 361  | 850.81  | 1699.60 | 1700.90 | 94.54  | 3.30E-07 | EKGQAFLDDLILDPK          |

|     |              |                                                                   |      |      |         |         |         |       |          |                       |
|-----|--------------|-------------------------------------------------------------------|------|------|---------|---------|---------|-------|----------|-----------------------|
| 148 | gi 189517144 | PREDICTED: similar to adaptor-related protein complex :           | 43.7 | 930  | 835.88  | 1669.75 | 1668.88 | 78.67 | 1.30E-05 | KGPGAVSVNELEEGKR      |
| 149 | gi 27545251  | solute carrier family 25 alpha, member 5 [Danio rerio]            | 58.7 | 298  | 525.02  | 1048.03 | 1047.57 | 38.02 | 0.18     | VFLDGVDKR             |
|     |              |                                                                   |      |      | 589.21  | 1176.41 | 1175.67 | 69.50 | 0.00013  | KVFLDGVDKR            |
|     |              |                                                                   |      |      | 618.00  | 1233.99 | 1232.68 | 66.02 | 0.00027  | DFLAGGIAAAISK         |
| 150 | gi 50540358  | hypothetical protein LOC436918 [Danio rerio]                      | 75.9 | 357  | 1252.70 | 1251.69 | 1251.62 | 69.12 | 0.00012  | LHAVNDAEVER           |
| 151 | gi 24119234  | triosephosphate isomerase 1a [Danio rerio]                        | 38.7 | 248  | 1458.82 | 1457.81 | 1457.72 | 75.26 | 3.00E-05 | HVFGESDELIGQK         |
|     |              |                                                                   |      |      | 808.43  | 1614.84 | 1613.82 | 57.16 | 0.0019   | RHVFGESDELIGQK        |
| 152 | gi 154707842 | methylmalonyl Coenzyme A mutase [Danio rerio]                     | 37.1 | 757  | 595.61  | 1189.21 | 1188.61 | 47.59 | 0.02     | AGLTIDEFAPR           |
|     |              |                                                                   |      |      | 870.13  | 1738.25 | 1737.81 | 79.76 | 9.90E-06 | SEFGEHEEIALAHNR       |
| 153 | gi 40254659  | bactin2 [Danio rerio]                                             | 51.5 | 375  | 489.44  | 976.86  | 975.44  | 48.58 | 0.016    | AGFAGDDAPR            |
|     |              |                                                                   |      |      | 566.61  | 1131.20 | 1131.52 | 37.35 | 0.22     | GYSFTTTAER            |
|     |              |                                                                   |      |      | 600.12  | 1198.22 | 1197.70 | 43.75 | 0.045    | AVFPSIVGRPR           |
|     |              |                                                                   |      |      | 758.70  | 1515.39 | 1514.74 | 39.42 | 0.12     | IWHHTFYNELR           |
|     |              |                                                                   |      |      | 978.73  | 1955.44 | 1953.06 | 67.08 | 0.00017  | VAPEEHPVLLTEAPLNPK    |
| 154 | gi 153791419 | si:ch73-252g14.4 [Danio rerio]                                    | 22.3 | 386  | 1244.37 | 2486.73 | 2486.30 | 90.43 | 6.50E-07 | VQQLLHAHTFGPQHNPVHGLF |
| 155 | gi 68379126  | PREDICTED: hypothetical protein LOC767664 [Danio rerio]           | 35.8 | 81   | 1494.75 | 1493.74 | 1493.82 | 56.01 | 0.0024   | IFLEDNGLPVHIK         |
|     |              |                                                                   |      |      | 748.64  | 1495.27 | 1493.82 | 76.25 | 2.20E-05 | IFLEDNGLPVHIK         |
| 156 | gi 46559752  | ATPase, Na+/K+ transporting, beta 1a polypeptide [Danio rerio]    | 36.6 | 306  | 659.22  | 1316.43 | 1315.59 | 65.54 | 0.0003   | VYGENIDYSEK           |
|     |              |                                                                   |      |      | 701.50  | 1400.99 | 1398.75 | 66.80 | 0.00022  | REEEANLLGQIK          |
| 157 | gi 47777306  | Voltage-dependent anion channel 1 [Danio rerio]                   | 66.1 | 283  | 660.08  | 1318.14 | 1317.64 | 60.19 | 0.001    | WAEHGLTFTEK           |
|     |              |                                                                   |      |      | 1045.44 | 2088.86 | 2088.16 | 70.82 | 7.00E-05 | VNSSLVGLGYTQTLKPGIK   |
| 158 | gi 68448530  | vitellogenin 5 [Danio rerio]                                      | 55.4 | 1360 | 481.12  | 960.22  | 959.47  | 36.63 | 0.28     | LEVEWER               |
|     |              |                                                                   |      |      | 587.65  | 1173.29 | 1172.62 | 56.41 | 0.0027   | LEFEVQVGPR            |
|     |              |                                                                   |      |      | 590.06  | 1178.11 | 1176.64 | 48.71 | 0.015    | QTLAFVEIEK            |
| 159 | gi 54262125  | heat shock protein 9 [Danio rerio]                                | 38.1 | 682  | 823.69  | 1645.37 | 1644.87 | 88.91 | 1.30E-06 | VINEPTAAALAYGLDK      |
| 160 | gi 41055939  | sorting and assembly machinery component 50 homolog               | 50.3 | 469  | 665.33  | 1992.95 | 1992.02 | 77.36 | 1.50E-05 | TKEDILTYEIADVFAK      |
| 161 | gi 47085765  | hypothetical protein LOC406325 [Danio rerio]                      | 55.4 | 397  | 1188.77 | 1187.76 | 1187.68 | 48.56 | 0.017    | ITAHLVHELK            |
|     |              |                                                                   |      |      | 932.43  | 1862.85 | 1861.98 | 75.84 | 2.40E-05 | TNVNGGAIAGHPLGASGTR   |
| 162 | gi 189533701 | PREDICTED: calpastatin [Danio rerio]                              | 62.6 | 824  | 1343.80 | 1342.79 | 1342.74 | 71.34 | 7.70E-05 | HGAGVPAGVPEKPK        |
|     |              |                                                                   |      |      | 736.38  | 1470.75 | 1470.83 | 48.01 | 0.016    | KHGAGVPAGVPEKPK       |
| 163 | gi 189519111 | PREDICTED: similar to ATPase, Ca++ transporting, fast             | 43.2 | 1005 | 1072.60 | 1071.59 | 1071.56 | 41.86 | 0.079    | NAENAIEALK            |
|     |              |                                                                   |      |      | 788.74  | 1575.47 | 1573.86 | 86.36 | 2.40E-06 | VDQSILTGESVSVIK       |
| 164 | gi 41056123  | phosphoglycerate mutase 2 (muscle) [Danio rerio]                  | 62   | 255  | 530.30  | 1058.58 | 1058.55 | 50.79 | 0.011    | HYGGLTGLNK            |
|     |              |                                                                   |      |      | 633.57  | 1265.13 | 1263.70 | 50.58 | 0.0088   | NVIAAHGNSLR           |
|     |              |                                                                   |      |      | 672.48  | 1342.95 | 1342.57 | 41.92 | 0.067    | HGESSWNQENR           |
|     |              |                                                                   |      |      | 828.27  | 1654.52 | 1653.91 | 60.12 | 0.00091  | ALPFWNEVIVPEIK        |
|     |              |                                                                   |      |      | 1058.87 | 2115.72 | 2115.10 | 36.73 | 0.18     | DLKPIKPMQFLGDEETVR    |
| 165 | gi 50344731  | fibrinogen alpha chain [Danio rerio]                              | 53.7 | 684  | 676.59  | 1351.17 | 1350.70 | 72.52 | 5.30E-05 | LGISDSEFLTAAK         |
|     |              |                                                                   |      |      | 750.64  | 1499.26 | 1498.69 | 57.20 | 0.0018   | FPTSGTGSTSQTSNK       |
| 166 | gi 54400698  | hydroxysteroid (17-beta) dehydrogenase 10 [Danio rerio]           | 46.2 | 260  | 852.76  | 1703.51 | 1702.86 | 86.75 | 2.10E-06 | HGASAVILDLPSSDGHK     |
| 167 | gi 120952565 | reticulon 4a isoform 4-I [Danio rerio]                            | 16.5 | 322  | 843.32  | 1684.62 | 1684.83 | 86.64 | 2.10E-06 | HQAQIDHYYGLVNK        |
| 168 | gi 40254661  | annexin A5 [Danio rerio]                                          | 47.9 | 317  | 530.21  | 1058.40 | 1058.56 | 40.72 | 0.1      | SEVDLLDIR             |
|     |              |                                                                   |      |      | 1144.59 | 2287.17 | 2284.98 | 86.60 | 1.70E-06 | EHDKDLEEDVTGDTGGHFER  |
| 169 | gi 41387146  | peroxiredoxin 6 [Danio rerio]                                     | 64.9 | 222  | 1052.48 | 2102.95 | 2103.09 | 75.38 | 2.50E-05 | PGILLGDVFPNFEADTTIGK  |
| 170 | gi 62955301  | hypothetical protein LOC550355 [Danio rerio]                      | 62   | 255  | 925.29  | 1848.57 | 1848.92 | 77.21 | 1.70E-05 | VLPQVDVTGHEEEQGGK     |
| 171 | gi 54400460  | fibulin 5 [Danio rerio]                                           | 23.1 | 477  | 1111.23 | 2220.45 | 2220.00 | 85.10 | 2.50E-06 | NSPLPYPEASYPEEPYDPR   |
| 172 | gi 47085923  | pyruvate dehydrogenase (lipoamide) beta [Danio rerio]             | 30.4 | 359  | 879.64  | 1757.27 | 1758.94 | 53.19 | 0.0045   | SIRPLDADTIETSITK      |
|     |              |                                                                   |      |      | 901.77  | 1801.52 | 1800.89 | 51.77 | 0.0063   | VFLLGEEVAQYDGAYK      |
|     |              |                                                                   |      |      | 967.33  | 1932.65 | 1932.85 | 44.87 | 0.028    | DALNQAMDEELERDER      |
| 173 | gi 57526509  | propionyl-Coenzyme A carboxylase, alpha polypeptide [Danio rerio] | 63.2 | 709  | 1164.68 | 1163.67 | 1164.65 | 55.10 | 0.0031   | HIEIQVLADK            |
|     |              |                                                                   |      |      | 827.11  | 1652.21 | 1649.84 | 62.11 | 0.00057  | TVAVHSDVDSSAVHVK      |
| 174 | gi 148224245 | hypothetical protein LOC793834 [Danio rerio]                      | 46.7 | 763  | 653.21  | 1304.41 | 1303.71 | 61.87 | 0.00069  | MQLLEIITTDK           |

|     |              |                                                             |      |      |         |         |         |       |          |                         |
|-----|--------------|-------------------------------------------------------------|------|------|---------|---------|---------|-------|----------|-------------------------|
| 175 | gi 68389723  | PREDICTED: catechol-O-methyltransferase domain cont         | 42.9 | 238  | 752.68  | 1503.34 | 1503.72 | 64.87 | 0.00033  | TAE EVTGLSQEGQR         |
| 176 | gi 41055748  | integrin linked kinase [Danio rerio]                        | 24.6 | 452  | 1029.00 | 2055.99 | 2055.00 | 84.28 | 3.10E-06 | SHEGDDPLLQYVVNNSLR      |
| 177 | gi 61806484  | hypothetical protein LOC541328 [Danio rerio]                | 35.3 | 116  | 792.72  | 1583.43 | 1582.76 | 83.90 | 4.00E-06 | GDDTPLHLAASHGHR         |
| 178 | gi 117606266 | ATPase, Ca++ transporting, cardiac muscle, fast twitch 1    | 31.2 | 991  | 1121.07 | 2240.13 | 2240.16 | 83.69 | 3.50E-06 | INAGQIEEVIAQAEELSLSR    |
| 179 | gi 189519965 | PREDICTED: similar to nonmuscle myosin heavy chain [l       | 37.8 | 1857 | 788.74  | 1575.47 | 1573.86 | 86.36 | 2.40E-06 | VDQSILTGESVSVIK         |
| 180 | gi 189521338 | PREDICTED: hypothetical protein [Danio rerio]               | 50.3 | 523  | 1093.83 | 2185.64 | 2184.99 | 76.48 | 1.90E-05 | HAEQERDELADEISNSASGK    |
| 181 | gi 189520787 | PREDICTED: tyrosine 3-monooxygenase/tryptophan 5-m          | 60.2 | 244  | 790.68  | 1579.35 | 1577.76 | 83.48 | 4.20E-06 | YDVQVQIENVEDK           |
|     |              |                                                             |      |      | 945.67  | 1889.33 | 1888.04 | 37.61 | 0.16     | ASVNIQIVDVPGPPQNLK      |
|     |              |                                                             |      |      | 903.52  | 902.51  | 902.51  | 42.18 | 0.083    | VISSIEQK                |
|     |              |                                                             |      |      | 1155.50 | 1154.49 | 1154.55 | 60.78 | 0.00087  | YLSEVASGDSK             |
|     |              |                                                             |      |      | 587.18  | 1172.34 | 1170.56 | 41.88 | 0.074    | AYQDAFEISK              |
|     |              |                                                             |      |      | 745.40  | 1488.78 | 1488.71 | 51.91 | 0.0066   | AVTEGGVELSNEER          |
| 182 | gi 113678344 | BCL2-like 13 (apoptosis facilitator) [Danio rerio]          | 18.8 | 485  | 1030.15 | 3087.41 | 3085.41 | 61.28 | 0.00044  | SLDSAEGVALAEQSENNSSNS   |
| 183 | gi 61806580  | hypothetical protein LOC541378 [Danio rerio]                | 67.2 | 448  | 919.82  | 1837.62 | 1836.96 | 64.83 | 0.00029  | DKPHLNIGTIGHVDHGK       |
| 184 | gi 47085905  | tyrosine 3-monooxygenase/tryptophan 5-monooxygenase         | 34.7 | 242  | 903.52  | 902.51  | 902.51  | 42.18 | 0.083    | VISSIEQK                |
|     |              |                                                             |      |      | 1155.50 | 1154.49 | 1154.55 | 60.78 | 0.00087  | YLSEVASGDSK             |
|     |              |                                                             |      |      | 745.40  | 1488.78 | 1488.71 | 51.91 | 0.0066   | AVTEGGVELSNEER          |
| 185 | gi 58801526  | SET translocation (myeloid leukemia-associated) B [Dani     | 16   | 275  | 605.37  | 1208.73 | 1207.60 | 35.37 | 0.3      | VEVTEFEDIK              |
|     |              |                                                             |      |      | 1098.47 | 2194.92 | 2194.01 | 81.47 | 5.90E-06 | EQQEAIHIDEVQNEIDR       |
| 186 | gi 58801528  | SET translocation (myeloid leukemia-associated) A [Dani     | 15.2 | 269  | 605.37  | 1208.73 | 1207.60 | 35.37 | 0.3      | VEVTEFEDIK              |
|     |              |                                                             |      |      | 1098.47 | 2194.92 | 2194.01 | 81.47 | 5.90E-06 | EQQEAIHIDEVQNEIDR       |
| 187 | gi 51467909  | ATP synthase, H+ transporting, mitochondrial F1 comple:     | 52.6 | 209  | 637.34  | 1272.66 | 1272.67 | 64.58 | 0.00038  | SLDKVEQELGR             |
| 188 | gi 47086189  | propionyl Coenzyme A carboxylase, beta polypeptide [Da      | 38.8 | 557  | 782.72  | 1563.43 | 1561.80 | 42.52 | 0.055    | SDASILGGMIVSIGDK        |
|     |              |                                                             |      |      | 838.80  | 1675.58 | 1675.79 | 55.44 | 0.0029   | SVTNEEDVTQEELGGAK       |
|     |              |                                                             |      |      | 872.59  | 1743.16 | 1744.85 | 63.94 | 0.00039  | AYDMLDIVHGIVDER         |
| 189 | gi 189533438 | PREDICTED: novel protein similar to vertebrate apolipop     | 33.6 | 2633 | 1230.28 | 2458.55 | 2458.19 | 81.11 | 5.50E-06 | HAINQEINAYNTPAQFGLEGSGI |
| 190 | gi 67514531  | ubiquitin specific protease 5 [Danio rerio]                 | 27.9 | 834  | 602.99  | 1805.95 | 1804.92 | 67.29 | 0.00018  | RREEAESSGAPPPVAPR       |
| 191 | gi 50540382  | hypothetical protein LOC436930 [Danio rerio]                | 32.2 | 460  | 735.25  | 1468.49 | 1467.79 | 63.52 | 0.00043  | ALADQSPQIGVLEK          |
|     |              |                                                             |      |      | 832.57  | 1663.12 | 1662.89 | 52.80 | 0.0051   | SAAPPVLQPQDVQVSK        |
| 192 | gi 54606886  | hexokinase 1 [Danio rerio]                                  | 46.3 | 918  | 864.33  | 1726.64 | 1723.83 | 79.77 | 9.80E-06 | TKYDDAVDDLNLNAGK        |
| 193 | gi 189518076 | PREDICTED: filamin C, gamma b (actin binding protein 2      | 43.7 | 2732 | 805.13  | 1608.25 | 1607.78 | 36.13 | 0.23     | VDVGKDEEFTVNTR          |
|     |              |                                                             |      |      | 1115.87 | 2229.73 | 2228.03 | 42.68 | 0.044    | DGSCGVAYIVQEPGDYEVSIG   |
|     |              |                                                             |      |      | 1152.87 | 2303.73 | 2303.14 | 72.02 | 4.90E-05 | GQHVPGSPFQFTVGPLGEGGA   |
| 194 | gi 45356143  | tumor protein D52-like 2 isoform 1 [Danio rerio]            | 50.2 | 201  | 737.80  | 1473.58 | 1473.69 | 79.41 | 1.20E-05 | GLGSDSISDLPEER          |
| 195 | gi 113678458 | vitellogenin 2 isoform 1 [Danio rerio]                      | 56.5 | 1631 | 587.65  | 1173.29 | 1172.62 | 56.41 | 0.0027   | LEFEVQVGPR              |
| 196 | gi 27545305  | laminin, gamma 1 [Danio rerio]                              | 48.2 | 1593 | 559.44  | 1116.86 | 1115.56 | 37.28 | 0.23     | DAENLINTAR              |
|     |              |                                                             |      |      | 665.17  | 1328.32 | 1327.68 | 63.97 | 0.00042  | RAEAALGNAAADAK          |
|     |              |                                                             |      |      | 963.13  | 1924.24 | 1924.06 | 50.87 | 0.007    | EVLNTINALLGQLGNIDK      |
| 197 | gi 189514551 | PREDICTED: sorbin and SH3 domain containing 2a [Danio       | 26.4 | 2115 | 643.71  | 1285.40 | 1284.76 | 57.60 | 0.0018   | KSPTPVPLPPPR            |
| 198 | gi 47085823  | acyl-Coenzyme A dehydrogenase, C-4 to C-12 straight cl      | 54.5 | 424  | 924.30  | 1846.58 | 1846.92 | 75.34 | 2.70E-05 | AFTGFIVDADTPGVQPGR      |
| 199 | gi 47085679  | electron-transfer-flavoprotein, beta polypeptide [Danio rei | 56.3 | 254  | 924.89  | 923.88  | 924.50  | 63.43 | 0.00041  | GIHVEVSGK               |
| 200 | gi 30017425  | ATPase, Na+/K+ transporting, alpha 1a.5 polypeptide [Da     | 32.1 | 1023 | 906.81  | 1811.60 | 1810.94 | 74.81 | 3.00E-05 | QGAIVAVTGDGVNDSPALK     |
| 201 | gi 18858303  | ATPase, Na+/K+ transporting, alpha 1b polypeptide [Dan      | 34.1 | 1025 | 906.81  | 1811.60 | 1810.94 | 74.81 | 3.00E-05 | QGAIVAVTGDGVNDSPALK     |
| 202 | gi 66472494  | phosphorylase, glycogen (muscle) A [Danio rerio]            | 37.2 | 842  | 594.42  | 1186.83 | 1184.64 | 74.74 | 4.00E-05 | GLAGVENVADLK            |
| 203 | gi 41054784  | phosphorylase, glycogen (muscle) b [Danio rerio]            | 38.1 | 315  | 594.42  | 1186.83 | 1184.64 | 74.74 | 4.00E-05 | GLAGVENVADLK            |
| 204 | gi 41387136  | hypothetical protein LOC393781 [Danio rerio]                | 57   | 128  | 902.80  | 1803.58 | 1801.94 | 74.18 | 3.60E-05 | YHVSETPFAISAQKPK        |
| 205 | gi 53933242  | cytochrome c oxidase subunit VIa polypeptide 1 [Danio re    | 69.4 | 108  | 781.74  | 2342.19 | 2341.05 | 50.66 | 0.0067   | TLFHNPHVNALPDGYEHHDE    |
| 206 | gi 41282137  | ATPase, Na+/K+ transporting, alpha 3a polypeptide [Dan      | 34.8 | 1023 | 906.81  | 1811.60 | 1810.94 | 74.81 | 3.00E-05 | QGAIVAVTGDGVNDSPALK     |
| 207 | gi 35902900  | aldolase c, fructose-bisphosphate [Danio rerio]             | 47.9 | 363  | 1136.95 | 2271.88 | 2271.13 | 72.97 | 4.10E-05 | GVVPLAGTNGETTTQGLDGLSE  |
| 208 | gi 57525836  | hypothetical protein LOC445175 [Danio rerio]                | 35   | 697  | 652.16  | 1302.30 | 1301.66 | 63.04 | 0.00053  | SHIDELYANIK             |
| 209 | gi 66472480  | NADH dehydrogenase (ubiquinone) Fe-S protein 5 [Danio       | 52.8 | 106  | 643.28  | 1284.55 | 1283.66 | 72.00 | 6.40E-05 | WLLAQSGEQPR             |
| 210 | gi 41151982  | major vault protein [Danio rerio]                           | 34.2 | 863  | 1069.61 | 2137.21 | 2137.12 | 65.00 | 0.00026  | IPPHHYIHVLDQNTNIAR      |

|     |              |                                                                                      |      |      |         |         |         |       |          |                          |
|-----|--------------|--------------------------------------------------------------------------------------|------|------|---------|---------|---------|-------|----------|--------------------------|
| 211 | gi 189536521 | PREDICTED: similar to phosphofructokinase, platelet [Danio rerio]                    | 49.2 | 789  | 1353.45 | 2704.89 | 2704.43 | 36.37 | 0.16     | STLITDGSSPINLFTTANGLLGS  |
| 212 | gi 157426949 | hydroxyacyl-Coenzyme A dehydrogenase/3-ketoacyl-CoA synthetase [Danio rerio]         | 57.4 | 761  | 699.53  | 1397.05 | 1395.70 | 71.84 | 6.30E-05 | DLQANVEHLTEK             |
|     |              |                                                                                      |      |      | 653.21  | 1304.41 | 1303.71 | 61.87 | 0.00069  | MLLEIITTDK               |
|     |              |                                                                                      |      |      | 697.27  | 1392.52 | 1392.67 | 46.97 | 0.021    | LSGQLDYHGFEK             |
|     |              |                                                                                      |      |      | 882.60  | 1763.19 | 1760.86 | 42.36 | 0.056    | LTAPPAVSSDEDIQYR         |
| 213 | gi 51010955  | hypothetical protein LOC445042 [Danio rerio]                                         | 52.9 | 104  | 609.53  | 1217.04 | 1215.65 | 71.12 | 8.90E-05 | ALTAGSEASGKPK            |
| 214 | gi 38488700  | phosphoglycerate mutase 1 [Danio rerio]                                              | 46.9 | 254  | 530.30  | 1058.58 | 1058.55 | 50.79 | 0.011    | HYGGLTGLNK               |
|     |              |                                                                                      |      |      | 835.57  | 1669.12 | 1668.89 | 60.67 | 0.0008   | ALPFWNDEIVPQIK           |
| 215 | gi 38707985  | electron-transfer-flavoprotein, alpha polypeptide [Danio rerio]                      | 52.9 | 333  | 713.78  | 1425.54 | 1424.81 | 70.23 | 9.10E-05 | LDVAPISDIEIK             |
| 216 | gi 47086009  | ribosomal protein L19 [Danio rerio]                                                  | 33.2 | 196  | 972.51  | 1943.00 | 1941.92 | 70.00 | 8.40E-05 | VWLDPNETNEIANANSR        |
| 217 | gi 189523865 | PREDICTED: myosin 1b-like 2 [Danio rerio]                                            | 42.5 | 1078 | 752.67  | 2254.98 | 2255.13 | 50.39 | 0.0076   | SLRHQDKDQCILITGESGAGK    |
| 218 | gi 18858873  | heat shock protein 90-alpha 1 [Danio rerio]                                          | 24.2 | 726  | 868.56  | 1735.10 | 1734.74 | 69.58 | 0.00011  | IEDLGADEDEDSKDGK         |
| 219 | gi 18858379  | carbonic anhydrase [Danio rerio]                                                     | 50.4 | 260  | 502.52  | 1003.03 | 1000.54 | 37.51 | 0.22     | VLDALDDIK                |
|     |              |                                                                                      |      |      | 824.38  | 2470.10 | 2471.13 | 63.52 | 0.00032  | QFHFWGSSDDKGSEHTIAGT     |
| 220 | gi 189517212 | PREDICTED: similar to myosin, heavy polypeptide 11, smooth muscle [Danio rerio]      | 32.1 | 1994 | 864.56  | 1727.10 | 1725.94 | 69.31 | 0.00011  | QLLQANPILEAFGNAK         |
| 221 | gi 116235424 | hypothetical protein LOC572011 [Danio rerio]                                         | 35.1 | 823  | 715.67  | 1429.33 | 1429.70 | 69.18 | 0.00012  | ELQEAQELANTGK            |
| 222 | gi 51010975  | hypothetical protein LOC445053 [Danio rerio]                                         | 38.2 | 204  | 853.75  | 1705.49 | 1704.91 | 69.08 | 0.00012  | GATYGKPVHGVNQIK          |
| 223 | gi 189537447 | PREDICTED: similar to Ndufa9 protein [Danio rerio]                                   | 38.7 | 380  | 690.97  | 1379.93 | 1379.71 | 69.07 | 0.00012  | FFEAAVGEAKPSK            |
| 224 | gi 189527793 | PREDICTED: wu:fb05a01 [Danio rerio]                                                  | 46.3 | 6009 | 578.82  | 1155.63 | 1155.65 | 55.90 | 0.0027   | LKGDVDVSVPK              |
|     |              |                                                                                      |      |      | 651.29  | 1300.57 | 1299.69 | 36.73 | 0.22     | LMGSNVDLNLPK             |
| 225 | gi 47550733  | SERPINE1 mRNA binding protein 1 [Danio rerio]                                        | 32.5 | 391  | 1118.80 | 2235.59 | 2235.08 | 68.31 | 0.00012  | RFDKPADEKPAEGGEFSVEK     |
| 226 | gi 189515773 | PREDICTED: amylo-1, 6-glucosidase, 4-alpha-glucanotransferase [Danio rerio]          | 41.6 | 1532 | 895.72  | 1789.43 | 1787.00 | 68.18 | 0.00015  | GLPALIQDHPHLHAIR         |
| 227 | gi 189521867 | PREDICTED: similar to histone cluster 2, H2ab [Danio rerio]                          | 66.7 | 144  | 1136.50 | 2270.98 | 2270.37 | 45.74 | 0.021    | LLGGVTIAQGGVLPNIQAVLLPK  |
|     |              |                                                                                      |      |      | 973.15  | 2916.42 | 2914.58 | 54.31 | 0.0023   | VGAGAPVYLAHVLEYLTAIEILEL |
| 228 | gi 41055102  | H2A histone family, member X [Danio rerio]                                           | 62   | 142  | 1136.50 | 2270.98 | 2270.37 | 45.74 | 0.021    | LLGGVTIAQGGVLPNIQAVLLPK  |
|     |              |                                                                                      |      |      | 973.15  | 2916.42 | 2914.58 | 54.31 | 0.0023   | VGAGAPVYLAHVLEYLTAIEILEL |
| 229 | gi 68441421  | PREDICTED: similar to Mid1ip1 protein [Danio rerio]                                  | 62.5 | 128  | 1136.50 | 2270.98 | 2270.37 | 45.74 | 0.021    | LLGGVTIAQGGVLPNIQAVLLPK  |
|     |              |                                                                                      |      |      | 973.15  | 2916.42 | 2914.58 | 54.31 | 0.0023   | VGAGAPVYLAHVLEYLTAIEILEL |
| 230 | gi 41152365  | ATP synthase, H+ transporting, mitochondrial F1 complex, alpha subunit [Danio rerio] | 68.6 | 159  | 732.54  | 1463.06 | 1462.69 | 70.61 | 8.60E-05 | AQSELVSASDEATR           |
| 231 | gi 70887615  | hypothetical protein LOC558711 [Danio rerio]                                         | 52.6 | 367  | 656.84  | 1311.67 | 1311.74 | 67.35 | 0.00018  | VKVESQVAVPEK             |
| 232 | gi 51467931  | enolase 2 [Danio rerio]                                                              | 59.7 | 434  | 1008.42 | 3022.23 | 3024.58 | 66.73 | 0.00013  | HIADLAGNTELVLPVPAFNVINGI |
| 233 | gi 82658182  | cytochrome c-1 [Danio rerio]                                                         | 36.8 | 307  | 715.11  | 1428.21 | 1425.71 | 66.24 | 0.00024  | NLVGVSHTEDEVK            |
| 234 | gi 125832496 | PREDICTED: similar to mCG2694 [Danio rerio]                                          | 25   | 308  | 550.57  | 1099.13 | 1098.61 | 50.09 | 0.011    | QLADALKANR               |
| 235 | gi 41053309  | hydroxyacylglutathione hydrolase [Danio rerio]                                       | 28.5 | 260  | 970.86  | 1939.71 | 1938.91 | 65.72 | 0.00023  | TVLTTHHHWDHAGGNEK        |
| 236 | gi 41056085  | keratin 8 [Danio rerio]                                                              | 37.3 | 520  | 1308.67 | 1307.66 | 1307.65 | 40.71 | 0.085    | NKYEDEINKR               |
|     |              |                                                                                      |      |      | 744.60  | 1487.19 | 1485.71 | 65.58 | 0.00028  | ANLENQIAEAEER            |
| 237 | gi 113681458 | NdrG4 [Danio rerio]                                                                  | 32.4 | 352  | 939.29  | 1876.56 | 1876.00 | 63.58 | 0.00039  | GNKPAILTYHDVGLNHNK       |
| 238 | gi 21426835  | glucose phosphate isomerase a [Danio rerio]                                          | 36.2 | 553  | 717.59  | 1433.16 | 1432.70 | 63.47 | 0.00045  | ELQASGLSGDSLEK           |
| 239 | gi 41152026  | phosphoglycerate mutase 1 like b [Danio rerio]                                       | 39.8 | 254  | 530.30  | 1058.58 | 1058.55 | 50.79 | 0.011    | HYGGLTGLNK               |
|     |              |                                                                                      |      |      | 1051.63 | 2101.25 | 2100.10 | 47.40 | 0.016    | NLKPVKPMQFLGDEETVR       |
| 240 | gi 41054573  | hydroxysteroid dehydrogenase like 2 [Danio rerio]                                    | 50.1 | 415  | 1588.03 | 3174.05 | 3171.54 | 58.77 | 0.00079  | DFDVYAVEPGHPLLPDFFLDGQ   |
| 241 | gi 189535572 | PREDICTED: hypothetical protein [Danio rerio]                                        | 61.5 | 455  | 759.60  | 1517.19 | 1517.74 | 36.85 | 0.21     | CPDCPGLLPLHEPK           |
|     |              |                                                                                      |      |      | 654.05  | 1959.11 | 1959.96 | 47.27 | 0.016    | FHDHRPGSVHPLGPDHR        |
| 242 | gi 116235416 | hypothetical protein LOC553452 [Danio rerio]                                         | 36.7 | 316  | 1009.26 | 2016.51 | 2014.96 | 62.10 | 0.00052  | HIDGAAVYNNETEVEGEGIK     |
| 243 | gi 45387723  | hypothetical protein LOC402952 [Danio rerio]                                         | 38.4 | 331  | 1181.37 | 3541.08 | 3539.71 | 48.56 | 0.0067   | GEDYYPPPPHYPPHPHDHPHI    |
| 244 | gi 61651682  | fibronectin 1b [Danio rerio]                                                         | 36   | 2408 | 1070.65 | 3208.93 | 3208.44 | 59.70 | 0.00061  | INTVGPTGHDSTDAHGHQHVEYT  |
| 245 | gi 47087077  | phosphoglycerate kinase 1 [Danio rerio]                                              | 59.5 | 417  | 916.46  | 915.45  | 915.45  | 52.89 | 0.0065   | FHVAEEGK                 |
|     |              |                                                                                      |      |      | 817.60  | 1633.19 | 1633.78 | 36.82 | 0.21     | LGDVYVNDAFGTAHR          |
| 246 | gi 189532432 | PREDICTED: novel protein similar to vertebrate AT rich protein [Danio rerio]         | 26.1 | 2113 | 651.79  | 1301.56 | 1299.71 | 37.15 | 0.2      | EIGGLTQVNKNK             |
|     |              |                                                                                      |      |      | 653.21  | 1304.41 | 1303.77 | 60.26 | 0.001    | RCLIEIFGILK              |
| 247 | gi 189532434 | PREDICTED: im:7160733 [Danio rerio]                                                  | 29.2 | 1248 | 653.21  | 1304.41 | 1303.77 | 60.26 | 0.001    | RCLIEIFGILK              |
| 248 | gi 66472386  | hypothetical protein LOC553711 [Danio rerio]                                         | 49.7 | 163  | 763.67  | 2287.99 | 2287.11 | 59.91 | 0.00081  | GDRPLTYEQAHHPHHISHR      |

|     |              |                                                                                        |      |      |         |         |         |       |         |                          |
|-----|--------------|----------------------------------------------------------------------------------------|------|------|---------|---------|---------|-------|---------|--------------------------|
| 249 | gj 32308156  | annexin A1a [Danio rerio]                                                              | 48.2 | 340  | 783.03  | 1564.04 | 1563.83 | 59.90 | 0.00099 | GVDEPTIIDTLVHR           |
| 250 | gj 189536881 | PREDICTED: hypothetical protein LOC402880 [Danio rerio]                                | 35.8 | 173  | 685.99  | 1369.96 | 1367.74 | 50.88 | 0.0081  | LDTPLPDVPPFVR            |
| 251 | gj 51011113  | hydroxyacyl-Coenzyme A dehydrogenase [Danio rerio]                                     | 71.8 | 309  | 819.15  | 1636.29 | 1636.85 | 49.33 | 0.011   | DPDNPLFAPSLLNK           |
|     |              |                                                                                        |      |      | 923.59  | 2767.73 | 2767.42 | 36.64 | 0.14    | NVSTSTDAASVVHGTDLVVEAV   |
| 252 | gj 40363541  | S-adenosylhomocysteine hydrolase [Danio rerio]                                         | 47.8 | 433  | 480.61  | 1438.81 | 1437.75 | 58.91 | 0.0012  | KLDEEVAAHLDK             |
| 253 | gj 50344812  | ribosomal protein S13 [Danio rerio]                                                    | 45   | 151  | 848.35  | 1694.68 | 1692.91 | 58.79 | 0.0013  | GLAPDLPEDLYHLIK          |
| 254 | gj 41054351  | ribosomal protein L27 [Danio rerio]                                                    | 30.1 | 136  | 752.58  | 2254.71 | 2255.09 | 58.76 | 0.0011  | NIDDGTADRPYSHALVAGIDR    |
| 255 | gj 50539832  | lysyl-tRNA synthetase [Danio rerio]                                                    | 29.4 | 602  | 1124.52 | 2247.02 | 2247.14 | 58.56 | 0.0011  | YNHLQPGDHLTDVVLNLSGR     |
| 256 | gj 189518755 | malic enzyme 2, NAD(+)-dependent, mitochondrial isoform [Danio rerio]                  | 40.3 | 581  | 1093.30 | 2184.59 | 2184.23 | 58.56 | 0.0012  | SFLDAVNVIKPTAIGVSGAGR    |
| 257 | gj 68444185  | PREDICTED: cytochrome c oxidase subunit Vab [Danio rerio]                              | 76.7 | 172  | 487.46  | 972.90  | 971.54  | 40.97 | 0.1     | LNDLASAIR                |
|     |              |                                                                                        |      |      | 1659.13 | 3316.24 | 3314.75 | 50.52 | 0.0047  | EIYPYVIQELKPTLQELGISTPEE |
| 258 | gj 47551341  | adenylosuccinate synthase like 1 [Danio rerio]                                         | 52   | 456  | 643.44  | 1284.87 | 1284.72 | 56.83 | 0.0021  | LDILDVLDEIK              |
| 259 | gj 189526054 | PREDICTED: hypothetical protein LOC335621, partial [Danio rerio]                       | 47.5 | 530  | 721.66  | 1441.30 | 1439.87 | 56.81 | 0.002   | AKLAAQEVELKLK            |
| 260 | gj 113678983 | hypothetical protein LOC751707 [Danio rerio]                                           | 37.6 | 606  | 1090.85 | 2179.69 | 2179.07 | 56.63 | 0.0018  | GGENIYPAEIEQFLHHPK       |
| 261 | gj 41152189  | hypothetical protein LOC393720 [Danio rerio]                                           | 71.7 | 244  | 820.65  | 1639.28 | 1638.85 | 49.87 | 0.0098  | RVEAIINNYPEGHK           |
| 262 | gj 41152375  | mitochondrial ATP synthase gamma-subunit [Danio rerio]                                 | 54.5 | 292  | 1097.58 | 1096.57 | 1095.60 | 55.25 | 0.003   | HLIIGVSSDR               |
| 263 | gj 47086943  | ATP synthase, H+ transporting, mitochondrial F0 complex c1 [Danio rerio]               | 61.6 | 112  | 905.44  | 904.43  | 904.45  | 39.81 | 0.14    | NLAEETTK                 |
|     |              |                                                                                        |      |      | 674.56  | 1347.10 | 1346.68 | 55.37 | 0.003   | ASGGVVDAGPVYQK           |
| 264 | gj 52219158  | aquaporin 8 [Danio rerio]                                                              | 22.7 | 260  | 1058.86 | 2115.71 | 2113.97 | 55.02 | 0.0027  | SELFTVATGDGGDNHQNPQK     |
| 265 | gj 41054699  | hypothetical protein LOC393530 [Danio rerio]                                           | 42.6 | 516  | 1059.44 | 1058.43 | 1058.47 | 54.82 | 0.004   | EHDFSEAPK                |
| 266 | gj 189516256 | PREDICTED: similar to phosphofructokinase, platelet [Danio rerio]                      | 45.8 | 782  | 706.78  | 1411.55 | 1411.69 | 54.77 | 0.0032  | DLQSNVEHLTEK             |
| 267 | gj 131888959 | hypothetical protein LOC100034538 [Danio rerio]                                        | 12.5 | 448  | 710.05  | 1418.09 | 1415.74 | 54.44 | 0.0037  | EALGAENIQSTKR            |
| 268 | gj 47085781  | ubiquitin-like modifier activating enzyme 1 [Danio rerio]                              | 41.1 | 1058 | 733.66  | 2197.94 | 2196.12 | 54.35 | 0.0031  | FDRPGQLHVGFQALHAFEK      |
| 269 | gj 47086817  | bscv (C20orf3) homolog [Danio rerio]                                                   | 23.9 | 415  | 1046.78 | 2091.54 | 2090.05 | 54.31 | 0.0031  | LNRPHIITDETPEPQYK        |
| 270 | gj 189524989 | PREDICTED: neurobeachin-like 2 [Danio rerio]                                           | 45.2 | 1495 | 655.96  | 1309.91 | 1308.70 | 53.90 | 0.004   | NNVAIEPLSAPGK            |
| 271 | gj 189521058 | PREDICTED: similar to cysteine and glycine-rich protein 1 [Danio rerio]                | 81.3 | 193  | 1251.74 | 2501.47 | 2503.17 | 53.78 | 0.003   | KGLDSTTVAHESEIYCKTCYGI   |
| 272 | gj 189527668 | PREDICTED: similar to janus kinase and microtubule interacting protein 1 [Danio rerio] | 37.2 | 807  | 773.19  | 1544.36 | 1543.91 | 52.30 | 0.006   | FQLKIAELQSVIR            |
| 273 | gj 168229163 | cysteine-rich protein 2 [Danio rerio]                                                  | 56.3 | 206  | 998.94  | 2993.79 | 2996.41 | 52.99 | 0.003   | TLAAGSHAEHDGQPYPYCHKPCYI |
| 274 | gj 46518516  | interferon 1 [Danio rerio]                                                             | 25.1 | 179  | 495.32  | 988.63  | 989.50  | 52.78 | 0.0066  | MDIASNAR                 |
| 275 | gj 55925377  | peptidase (mitochondrial processing) alpha [Danio rerio]                               | 44.9 | 517  | 1388.81 | 2775.60 | 2773.44 | 52.53 | 0.0038  | SKPAVAALGDLTELPSYEDIQAA  |
| 276 | gj 189541652 | PREDICTED: similar to Myosin-3 (Myosin heavy chain 3) [Danio rerio]                    | 31.4 | 882  | 660.22  | 1318.42 | 1315.65 | 52.39 | 0.0061  | ELELELDAEQK              |
| 277 | gj 189546569 | PREDICTED: complement component 3 [Danio rerio]                                        | 30.9 | 1648 | 652.15  | 1302.28 | 1301.65 | 52.01 | 0.0067  | EGTDQVIEGQVK             |
| 278 | gj 66773104  | branched chain keto acid dehydrogenase E1, alpha polypeptide [Danio rerio]             | 29.1 | 446  | 827.55  | 1653.08 | 1652.84 | 51.96 | 0.0059  | QGQIINPSEDPQLSK          |
| 279 | gj 189534068 | PREDICTED: nuclear RNA export factor 1 [Danio rerio]                                   | 50   | 642  | 731.60  | 1461.18 | 1460.65 | 51.91 | 0.0065  | FGGRGGGGGGGGGPPSDGR      |
| 280 | gj 56693302  | heat shock protein, alpha-crystallin-related, 1 [Danio rerio]                          | 29.1 | 199  | 668.10  | 1334.18 | 1332.69 | 51.50 | 0.007   | KYTLPPGVDSEK             |
| 281 | gj 148229906 | hypothetical protein LOC100037332 [Danio rerio]                                        | 28.8 | 302  | 550.58  | 1099.15 | 1098.64 | 46.82 | 0.024   | LKQELAEELR               |
| 282 | gj 47271398  | ribosomal protein L7 [Danio rerio]                                                     | 46.3 | 246  | 680.91  | 1359.81 | 1359.62 | 51.36 | 0.0076  | TTHFVEGGDAGNR            |
| 283 | gj 125854185 | PREDICTED: hypothetical protein [Danio rerio]                                          | 12.2 | 645  | 674.08  | 1346.15 | 1346.62 | 50.90 | 0.0086  | EEEEEQLKADK              |
| 284 | gj 189532605 | PREDICTED: thrombospondin, type I, domain containing 1 [Danio rerio]                   | 52   | 1684 | 1194.55 | 3580.61 | 3581.73 | 50.77 | 0.0039  | EVTCVHRSGSTASISQCTQQTLI  |
| 285 | gj 41055997  | hypothetical protein LOC393098 [Danio rerio]                                           | 30.3 | 343  | 863.60  | 1725.19 | 1724.92 | 50.74 | 0.0079  | DSTVLAHVMLLNER           |
| 286 | gj 125832538 | PREDICTED: nucleolar and coiled-body phosphoprotein 1 [Danio rerio]                    | 72.4 | 1001 | 1088.39 | 2174.77 | 2173.28 | 50.71 | 0.0069  | KKPATTTPVSKPTPAKPTPTVK   |
| 287 | gj 125833577 | PREDICTED: similar to Galectin-3 (Galactose-specific lectin 3) [Danio rerio]           | 29.6 | 368  | 670.63  | 1339.24 | 1337.66 | 50.69 | 0.0082  | GHEVVFHFNPR              |
| 288 | gj 41055658  | 3-hydroxyisobutyrate dehydrogenase b [Danio rerio]                                     | 45.3 | 329  | 867.36  | 1732.71 | 1729.95 | 50.68 | 0.0085  | KGSLIDSSTIDPAVSK         |
| 289 | gj 41054603  | actinin alpha 4 [Danio rerio]                                                          | 32.4 | 901  | 762.20  | 1522.39 | 1520.71 | 50.51 | 0.0085  | AGTQIENIEEDFR            |
| 290 | gj 66773056  | proteasome (prosome, macropain) subunit, alpha type, 2 [Danio rerio]                   | 56   | 234  | 734.65  | 2200.92 | 2200.13 | 50.39 | 0.0077  | YNEDLELEDAIHTAILTLK      |
| 291 | gj 189522138 | PREDICTED: similar to paxillin [Danio rerio]                                           | 39.7 | 527  | 1147.34 | 2292.67 | 2294.99 | 39.91 | 0.08    | TWHPEHFVCTHCQEEIGSR      |
| 292 | gj 189518402 | PREDICTED: similar to NLR family, CARD domain containing 1 [Danio rerio]               | 34.9 | 995  | 951.97  | 950.96  | 951.47  | 46.42 | 0.022   | CFDDIVLK                 |
| 293 | gj 116875779 | hypothetical protein LOC768287 [Danio rerio]                                           | 49.2 | 474  | 549.51  | 1097.01 | 1094.55 | 50.25 | 0.01    | AELQHLNDR                |
| 294 | gj 156616344 | hypothetical protein LOC100124599 [Danio rerio]                                        | 55   | 278  | 745.59  | 1489.17 | 1488.74 | 49.21 | 0.012   | ENQSVLITGESGAGK          |
| 295 | gj 189524320 | PREDICTED: similar to family with sequence similarity 88 [Danio rerio]                 | 37.4 | 174  | 533.18  | 1064.34 | 1063.51 | 49.33 | 0.013   | SRVSDCLER                |
| 296 | gj 148224341 | hypothetical protein LOC100038781 [Danio rerio]                                        | 21.2 | 226  | 538.13  | 1074.25 | 1073.56 | 49.09 | 0.015   | GGIHHISPEK               |
| 297 | gj 55742519  | vesicle-associated membrane protein 2 [Danio rerio]                                    | 64.5 | 110  | 833.77  | 1665.53 | 1664.80 | 48.94 | 0.012   | ADALQAGASQFETSAAK        |

|     |              |                                                                         |      |      |         |         |         |       |       |                          |
|-----|--------------|-------------------------------------------------------------------------|------|------|---------|---------|---------|-------|-------|--------------------------|
| 298 | gj 50344800  | vesicle-associated membrane protein 3 (cellubrevin) [Danio rerio]       | 58.8 | 102  | 833.77  | 1665.53 | 1664.80 | 48.94 | 0.012 | ADALQAGASQFETSAAK        |
| 299 | gj 47085833  | glyceraldehyde-3-phosphate dehydrogenase, spermatozoan                  | 40   | 335  | 718.66  | 1435.30 | 1434.76 | 48.73 | 0.013 | GAHQNIIPASTGAAK          |
| 300 | gj 189522849 | PREDICTED: similar to oxoglutarate (alpha-ketoglutarate)                | 21.9 | 961  | 1201.03 | 2400.04 | 2399.32 | 48.47 | 0.011 | NITLSLVANPSHLEAVNPVVQGH  |
| 301 | gj 125814522 | PREDICTED: si:dkey-261e22.2 [Danio rerio]                               | 37.5 | 1868 | 653.21  | 1304.41 | 1303.69 | 48.31 | 0.016 | DTSSDALELLIK             |
| 302 | gj 47086525  | ribosomal protein S15a [Danio rerio]                                    | 65.4 | 130  | 567.82  | 1700.43 | 1699.80 | 48.27 | 0.014 | HGYIGFEIIDDHR            |
| 303 | gj 41055407  | potassium channel, subfamily K, member 5 [Danio rerio]                  | 29.5 | 448  | 609.35  | 1216.68 | 1216.64 | 47.76 | 0.02  | KQEEELARSK               |
| 304 | gj 68448495  | hypothetical protein LOC100003906 isoform 1 [Danio rerio]               | 29   | 915  | 911.39  | 1820.76 | 1820.84 | 47.56 | 0.016 | SDASYDEIQGSQPPSLK        |
| 305 | gj 125817349 | PREDICTED: similar to CAP-GLY domain containing link                    | 44.6 | 1041 | 686.11  | 1370.20 | 1368.68 | 47.37 | 0.018 | HEIDAAVMAKER             |
| 306 | gj 116004537 | creatine kinase, brain [Danio rerio]                                    | 58.3 | 381  | 755.56  | 1509.10 | 1506.70 | 47.37 | 0.017 | GGDDLDPNYVLSSR           |
| 307 | gj 35902802  | chromobox homolog 2 [Danio rerio]                                       | 51.6 | 510  | 609.35  | 1216.68 | 1215.67 | 47.20 | 0.022 | EQEKELLISK               |
| 308 | gj 41282163  | protein disulfide isomerase-related protein (provisional) [Danio rerio] | 38.2 | 440  | 559.48  | 1116.95 | 1114.60 | 49.77 | 0.013 | GSTATVGGGALPK            |
| 309 | gj 41054003  | Cap1 CAP, adenylate cyclase-associated protein 1 [Danio rerio]          | 50.3 | 463  | 994.76  | 1987.51 | 1985.99 | 46.71 | 0.018 | VENQEGAQNLVISDTELK       |
| 310 | gj 189530311 | PREDICTED: hypothetical LOC555629 [Danio rerio]                         | 72.3 | 401  | 796.88  | 1591.74 | 1591.82 | 46.57 | 0.021 | QKMSLLSSNTEINK           |
| 311 | gj 46309527  | hypothetical protein LOC404610 [Danio rerio]                            | 36.6 | 325  | 724.76  | 1447.51 | 1447.76 | 46.36 | 0.024 | DALGILDELQAYK            |
| 312 | gj 113674674 | DEK oncogene-like [Danio rerio]                                         | 48   | 442  | 867.38  | 1732.74 | 1729.98 | 46.20 | 0.024 | KLLKTICQTLDLER           |
| 313 | gj 41152453  | tyrosine 3-monooxygenase/tryptophan 5-monooxygenase                     | 29   | 245  | 605.07  | 1208.12 | 1206.61 | 46.19 | 0.025 | YLAEVAVGEEK              |
| 314 | gj 125806044 | PREDICTED: similar to 19.9kD myosin light chain [Danio rerio]           | 29.5 | 173  | 699.83  | 1397.64 | 1398.63 | 46.09 | 0.024 | FTDEEVDELFR              |
| 315 | gj 157073897 | ubiquinol-cytochrome c reductase, Rieske iron-sulfur poly               | 29.7 | 273  | 773.42  | 1544.82 | 1542.79 | 45.70 | 0.028 | EIETEAGVNLAE LR          |
| 316 | gj 189525434 | PREDICTED: im:7157373 [Danio rerio]                                     | 46.6 | 545  | 954.39  | 2860.13 | 2859.32 | 45.68 | 0.017 | SAAAPPKKEEAPPANAPDGDAPA  |
| 317 | gj 189523403 | PREDICTED: NADH dehydrogenase (ubiquinone) flavop                       | 49.2 | 516  | 994.20  | 1986.38 | 1983.93 | 45.62 | 0.023 | TTDSPPADTAAADVAVEEPK     |
| 318 | gj 189516010 | PREDICTED: similar to leucine rich repeat containing 16l                | 40.1 | 1347 | 730.20  | 1458.38 | 1458.79 | 45.60 | 0.028 | GTVLVNALGSNACKL          |
| 319 | gj 189533816 | PREDICTED: hypothetical protein [Danio rerio]                           | 36   | 1020 | 493.60  | 985.18  | 983.60  | 45.55 | 0.032 | QLIEQLLK                 |
| 320 | gj 189530783 | PREDICTED: hypothetical protein isoform 2 [Danio rerio]                 | 31.1 | 222  | 493.60  | 985.18  | 983.65  | 45.55 | 0.032 | QILKKNLK                 |
| 321 | gj 50540198  | hypothetical protein LOC436839 [Danio rerio]                            | 48.3 | 201  | 721.18  | 1440.35 | 1439.63 | 45.52 | 0.027 | NIDEHANEDVER             |
| 322 | gj 116487349 | carboxylesterase 2-like [Danio rerio]                                   | 42   | 555  | 1027.86 | 2053.71 | 2052.99 | 45.38 | 0.024 | TGSPNPAPVPWPVYDQSNK      |
| 323 | gj 125843378 | PREDICTED: si:dkey-38112.3 [Danio rerio]                                | 25.3 | 549  | 1027.86 | 2053.71 | 2052.99 | 45.38 | 0.024 | TGSPNPAPVPWPVYDQSNK      |
| 324 | gj 189522914 | PREDICTED: similar to RAS and EF-hand domain contain                    | 40.1 | 551  | 506.72  | 1011.42 | 1012.59 | 45.19 | 0.03  | IVLAGDAAVVK              |
| 325 | gj 189523254 | PREDICTED: similar to CD22 antigen [Danio rerio]                        | 46.2 | 392  | 770.71  | 1539.41 | 1540.76 | 45.09 | 0.029 | IFSISKISSDDSDK           |
| 326 | gj 61806508  | signal peptidase complex subunit 2 homolog [Danio rerio]                | 63.7 | 201  | 650.84  | 1299.66 | 1299.73 | 44.33 | 0.037 | AARNGKNSILEK             |
| 327 | gj 68438157  | PREDICTED: similar to Histone H1.5 (H1 VAR.5) (H1b) [Danio rerio]       | 62.7 | 204  | 627.68  | 1253.35 | 1251.76 | 46.77 | 0.021 | ALVLNGTLVQPK             |
| 328 | gj 189536629 | PREDICTED: similar to DEP domain containing 2 [Danio rerio]             | 47.3 | 1600 | 611.27  | 1220.52 | 1218.70 | 44.63 | 0.037 | FNTIAIIDGKK              |
| 329 | gj 90652819  | hypothetical protein LOC664756 [Danio rerio]                            | 53.9 | 462  | 766.50  | 765.49  | 765.39  | 39.76 | 0.09  | FEEITK                   |
|     |              |                                                                         |      |      | 973.85  | 2918.52 | 2915.57 | 44.47 | 0.022 | EGGANGVTLLLEALDSILPPSRPT |
| 330 | gj 50233897  | FLJ12716-like protein [Danio rerio]                                     | 35.3 | 1132 | 1188.77 | 1187.76 | 1187.63 | 44.42 | 0.043 | TAYSLVHEL R              |
| 331 | gj 189529141 | PREDICTED: similar to NLR family, pyrin domain contain                  | 44.4 | 789  | 487.46  | 972.90  | 973.52  | 44.41 | 0.046 | DSAALASALR               |
| 332 | gj 153945891 | hypothetical protein LOC100101652 [Danio rerio]                         | 39.2 | 293  | 713.31  | 1424.60 | 1424.85 | 44.33 | 0.035 | RALTIQEIAALAR            |
| 333 | gj 189530012 | PREDICTED: wu:fb94b04 [Danio rerio]                                     | 33.9 | 762  | 551.34  | 1100.67 | 1098.61 | 44.29 | 0.045 | KLNEAQQLR                |
| 334 | gj 41056221  | hypothetical protein LOC393533 [Danio rerio]                            | 30.1 | 617  | 566.38  | 1130.75 | 1129.72 | 44.21 | 0.045 | SSLRLKVLSK               |
| 335 | gj 18858525  | death associated protein 1b [Danio rerio]                               | 77.1 | 109  | 469.10  | 1404.27 | 1403.80 | 44.20 | 0.039 | VRPSVEKPHISR             |
| 336 | gj 125814831 | PREDICTED: similar to zinc finger protein 585B [Danio rerio]            | 44.3 | 298  | 836.68  | 1671.35 | 1672.88 | 44.11 | 0.037 | EESEDVKIEEIIK            |
| 337 | gj 47086263  | phosphoglucomutase 2 [Danio rerio]                                      | 41.4 | 611  | 522.11  | 1042.20 | 1043.57 | 43.80 | 0.048 | ELNRNTAVK                |
| 338 | gj 125821665 | PREDICTED: similar to Putative S-adenosyl-L-methionin                   | 26.4 | 394  | 448.88  | 1343.62 | 1340.72 | 43.80 | 0.044 | FLRGEDLAAPPR             |
| 339 | gj 189530864 | PREDICTED: similar to RIKEN cDNA 2810405J04 gene                        | 52.3 | 516  | 581.62  | 1161.23 | 1160.63 | 43.73 | 0.047 | LCAWL VSELK              |
| 340 | gj 189525167 | PREDICTED: hypothetical protein [Danio rerio]                           | 39.7 | 1100 | 762.20  | 1522.39 | 1520.80 | 43.56 | 0.042 | VQLLQDLQDFFR             |
| 341 | gj 189533677 | PREDICTED: hypothetical protein [Danio rerio]                           | 39.1 | 128  | 531.01  | 1060.01 | 1058.51 | 43.41 | 0.057 | MQNHFGAVR                |
| 342 | gj 189530862 | PREDICTED: wu:fb54a03 [Danio rerio]                                     | 27.9 | 727  | 401.07  | 800.12  | 800.46  | 43.33 | 0.056 | ELEGLLK                  |
| 343 | gj 189520791 | PREDICTED: family with sequence similarity 62 (C2 dom                   | 27.7 | 1700 | 738.59  | 1475.17 | 1473.84 | 40.52 | 0.089 | IDFGGKPMKVVGVK           |
|     |              |                                                                         |      |      | 1094.98 | 3281.90 | 3280.56 | 43.09 | 0.028 | QKPVEDHSTGEEHEEKGPAT/    |
| 344 | gj 189528097 | PREDICTED: similar to sushi-repeat-containing protein, >                | 46.6 | 436  | 537.92  | 1073.83 | 1072.61 | 43.02 | 0.062 | LKCPLSREK                |
| 345 | gj 45433520  | hypothetical protein LOC327237 [Danio rerio]                            | 40.1 | 157  | 707.70  | 1413.38 | 1413.81 | 42.98 | 0.05  | ISREVIQMV LAR            |
| 346 | gj 113678297 | nudix (nucleoside diphosphate linked moiety X)-type moti                | 45.5 | 242  | 1056.28 | 2110.55 | 2110.04 | 42.84 | 0.044 | SKPKPLQPAEEEESESTEPK     |
| 347 | gj 45120100  | calcium channel, voltage-dependent, L type, alpha 1D su                 | 32.2 | 2082 | 701.36  | 2101.06 | 2100.08 | 38.30 | 0.13  | TAGKIKTEGNLEQANEELR      |



|     |              |                                                              |      |      |         |         |         |       |       |                        |
|-----|--------------|--------------------------------------------------------------|------|------|---------|---------|---------|-------|-------|------------------------|
| 348 | gi 53292609  | clathrin, heavy polypeptide a (Hc) [Danio rerio]             | 34.6 | 1680 | 472.54  | 943.07  | 942.49  | 42.73 | 0.064 | HELIEFR                |
| 349 | gi 41053833  | hypothetical protein LOC393213 [Danio rerio]                 | 25.2 | 333  | 542.49  | 1624.45 | 1623.84 | 42.64 | 0.052 | GHPDEAAAALKELFR        |
| 350 | gi 189532250 | PREDICTED: si:ch211-81a5.3 [Danio rerio]                     | 46   | 2962 | 771.84  | 1541.67 | 1540.86 | 42.63 | 0.053 | TDDPRSQLLQLKK          |
| 351 | gi 32401408  | annexin A11b [Danio rerio]                                   | 36.9 | 485  | 886.82  | 1771.62 | 1770.84 | 42.54 | 0.053 | SLYTHISGDTSGDYKK       |
| 352 | gi 125842393 | PREDICTED: zgc:103738 [Danio rerio]                          | 54.5 | 77   | 987.88  | 2960.60 | 2961.35 | 42.46 | 0.035 | TLSAGSHAEHEGKPYCNNPCY/ |
| 353 | gi 47086993  | palmitoyl-protein thioesterase 1 (ceroid-lipofuscinosis, ne  | 54.1 | 303  | 752.86  | 2255.55 | 2254.08 | 42.45 | 0.047 | HLVQAQYWHDP LNDDLYK    |
| 354 | gi 189522065 | PREDICTED: similar to Histone H1.2 (H1 VAR.1) (H1c) [I       | 82   | 200  | 456.60  | 1366.76 | 1365.83 | 44.67 | 0.032 | AKKAGPGV GELIVK        |
| 355 | gi 47086505  | fibrinogen, B beta polypeptide [Danio rerio]                 | 48   | 485  | 1376.63 | 1375.62 | 1375.70 | 48.45 | 0.015 | DTV DVTFPQNIK          |
| 356 | gi 82658210  | protein phosphatase 1, regulatory (inhibitor) subunit 7 [D:  | 33.6 | 345  | 1090.76 | 2179.50 | 2178.14 | 41.86 | 0.053 | V IENLDSLSSLES LFLGTNK |
| 357 | gi 160333235 | lyric-like [Danio rerio]                                     | 60.5 | 542  | 760.76  | 1519.50 | 1518.87 | 41.82 | 0.067 | SVTVKPHPPPHV PK        |
| 358 | gi 41053347  | mitochondrial trifunctional protein, beta subunit [Danio rei | 32.3 | 471  | 1197.60 | 1196.59 | 1196.57 | 41.61 | 0.068 | DFVYVSQDPK             |
| 359 | gi 189531881 | PREDICTED: solute carrier family 8 (sodium-calcium exc       | 24.2 | 967  | 770.74  | 1539.47 | 1536.85 | 41.54 | 0.067 | RPSIGGELGGPRVSR        |
| 360 | gi 52219178  | high-mobility group box 2 [Danio rerio]                      | 55.1 | 214  | 705.76  | 1409.50 | 1407.74 | 41.51 | 0.067 | SEHPNLTIGEIAK          |
| 361 | gi 189526982 | PREDICTED: similar to G protein-coupled receptor 103 [I      | 20.6 | 422  | 500.54  | 999.06  | 998.59  | 41.05 | 0.091 | IGIELWIR               |

### DMSO replicate 2

| Protein # | Accession ID | Protein name                                      | Protein coverage | length | peptide m/z             | peptide Mrexp | peptide Mrcalc | peptide score | pep_expect | peptide sequence      |
|-----------|--------------|---------------------------------------------------|------------------|--------|-------------------------|---------------|----------------|---------------|------------|-----------------------|
| 1         | gi 74315904  | alpha globin-like [Danio rerio]                   | 72.7             | 143    | 559.21                  | 1116.41       | 1114.56        | 61.51         | 0.00086    | ADEIGAEALAR           |
|           |              |                                                   |                  |        | 589.48                  | 1176.94       | 1175.62        | 79.59         | 1.20E-05   | TIMGAVGEAISK          |
|           |              |                                                   |                  |        | 684.19                  | 1366.37       | 1365.73        | 77.20         | 1.80E-05   | FFNNLALALSEK          |
|           |              |                                                   |                  |        | 933.26                  | 1864.50       | 1863.88        | 127.77        | 1.50E-10   | TYFSHWSDLSPGSGPVK     |
|           |              |                                                   |                  |        | 934.01                  | 1866.01       | 1868.00        | 50.86         | 0.0073     | IDDLVGGLAALSELHAFK    |
|           |              |                                                   |                  |        | 623.03                  | 1866.07       | 1863.88        | 50.21         | 0.0085     | TYFSHWSDLSPGSGPVK     |
|           |              |                                                   |                  |        | 934.08                  | 1866.14       | 1868.00        | 112.49        | 5.00E-09   | IDDLVGGLAALSELHAFK    |
|           |              |                                                   |                  |        | 934.14                  | 1866.26       | 1868.00        | 110.20        | 8.50E-09   | IDDLVGGLAALSELHAFK    |
|           |              |                                                   |                  |        | 934.20                  | 1866.38       | 1863.88        | 99.86         | 9.20E-08   | TYFSHWSDLSPGSGPVK     |
|           |              |                                                   |                  |        | 934.23                  | 1866.45       | 1868.00        | 90.05         | 8.80E-07   | IDDLVGGLAALSELHAFK    |
|           |              |                                                   |                  |        | 934.24                  | 1866.46       | 1863.88        | 89.80         | 9.40E-07   | TYFSHWSDLSPGSGPVK     |
|           |              |                                                   |                  |        | 934.28                  | 1866.55       | 1868.00        | 95.93         | 2.30E-07   | IDDLVGGLAALSELHAFK    |
|           |              |                                                   |                  |        | 934.40                  | 1866.79       | 1868.00        | 128.55        | 1.30E-10   | IDDLVGGLAALSELHAFK    |
|           |              |                                                   |                  |        | 996.85                  | 1991.69       | 1991.97        | 65.99         | 0.00021    | TYFSHWSDLSPGSGPVKK    |
| 1008.94   | 3023.79      | 3025.62                                           | 41.79            | 0.039  | TIMGAVGEAISKIDDLVGGLAAL |               |                |               |            |                       |
| 2         | gi 47271417  | hemoglobin alpha adult-1 [Danio rerio]            | 75.5             | 143    | 559.21                  | 1116.41       | 1114.56        | 61.51         | 0.00086    | ADEIGAEALAR           |
|           |              |                                                   |                  |        | 582.03                  | 1162.04       | 1161.61        | 84.54         | 3.80E-06   | TIMGAVGEAVSK          |
|           |              |                                                   |                  |        | 684.19                  | 1366.37       | 1365.73        | 77.20         | 1.80E-05   | FFNNLALALSEK          |
|           |              |                                                   |                  |        | 924.16                  | 1846.30       | 1847.88        | 127.55        | 1.60E-10   | TYFSHWADLSPGSGPVK     |
|           |              |                                                   |                  |        | 934.40                  | 1866.79       | 1868.00        | 128.55        | 1.30E-10   | IDDLVGGLAALSELHAFK    |
|           |              |                                                   |                  |        | 989.42                  | 1976.83       | 1975.98        | 76.11         | 2.10E-05   | TYFSHWADLSPGSGPVKK    |
| 3         | gi 41053652  | myoglobin [Danio rerio]                           | 82.3             | 147    | 456.00                  | 909.98        | 909.49         | 40.70         | 0.076      | ADHDLVLK              |
|           |              |                                                   |                  |        | 551.01                  | 1100.01       | 1098.58        | 83.28         | 5.60E-06   | AGLDAAGQGALR          |
|           |              |                                                   |                  |        | 780.67                  | 1559.33       | 1557.74        | 81.26         | 7.40E-06   | VMDAVIDIDGYYK         |
|           |              |                                                   |                  |        | 1010.16                 | 2018.30       | 2020.10        | 87.97         | 1.40E-06   | GDHAALLKPLANTHANIHK   |
|           |              |                                                   |                  |        | 1110.11                 | 2218.21       | 2219.23        | 109.00        | 1.00E-08   | AKGDHAALLKPLANTHANIHK |
|           |              |                                                   |                  |        | 1126.98                 | 2251.95       | 2253.18        | 117.85        | 1.30E-09   | FSGISQDLAGSPAVAAHGATV |
| 4         | gi 163644263 | ventricular myosin heavy chain-like [Danio rerio] | 62.4             | 1936   | 1191.84                 | 2381.67       | 2381.27        | 91.45         | 5.30E-07   | FSGISQDLAGSPAVAAHGATV |
|           |              |                                                   |                  |        | 699.39                  | 698.38        | 698.33         | 40.99         | 0.077      | HATENK                |
|           |              |                                                   |                  |        | 977.46                  | 976.45        | 976.48         | 41.31         | 0.09       | SNTAAASLDK            |
|           |              |                                                   |                  |        | 1074.55                 | 1073.54       | 1073.54        | 51.70         | 0.0085     | ADIAESQV NK           |
|           |              |                                                   |                  |        | 1180.76                 | 1179.75       | 1179.58        | 64.75         | 0.00034    | D FEISQLNSK           |
|           |              |                                                   |                  |        | 609.12                  | 1216.22       | 1215.63        | 46.69         | 0.025      | AGLLGQLEEMR           |
|           | 614.04       | 1226.07                                           | 1223.61          | 44.28  | 0.039                   | TKYETDAIQR    |                |               |            |                       |

|   |              |                                                         |      |         |         |         |         |          |                    |                          |
|---|--------------|---------------------------------------------------------|------|---------|---------|---------|---------|----------|--------------------|--------------------------|
|   |              |                                                         |      | 619.21  | 1236.41 | 1237.63 | 57.60   | 0.0018   | EADVLQQNPPK        |                          |
|   |              |                                                         |      | 624.15  | 1246.28 | 1244.65 | 73.73   | 4.80E-05 | DIDDLELTLAK        |                          |
|   |              |                                                         |      | 646.42  | 1290.83 | 1288.63 | 52.39   | 0.0062   | DSQLQLDDSLR        |                          |
|   |              |                                                         |      | 654.83  | 1307.64 | 1307.64 | 84.75   | 3.40E-06 | NSFSQQLEDLK        |                          |
|   |              |                                                         |      | 662.12  | 1322.23 | 1320.66 | 65.34   | 0.00029  | KLEDECSELKK        |                          |
|   |              |                                                         |      | 1368.62 | 1367.61 | 1367.63 | 55.83   | 0.0025   | LQHELDEAEER        |                          |
|   |              |                                                         |      | 700.52  | 1399.02 | 1397.75 | 81.11   | 7.60E-06 | NALLQAELEELR       |                          |
|   |              |                                                         |      | 708.70  | 1415.39 | 1414.73 | 99.59   | 1.10E-07 | LAEQELLDVTER       |                          |
|   |              |                                                         |      | 719.30  | 1436.59 | 1435.77 | 68.95   | 0.00012  | KKDFEISQLNSK       |                          |
|   |              |                                                         |      | 733.09  | 1464.16 | 1463.68 | 57.89   | 0.0016   | LSEKDEEMEQVK       |                          |
|   |              |                                                         |      | 733.28  | 1464.55 | 1464.77 | 90.20   | 9.20E-07 | LASADIETYLLEK      |                          |
|   |              |                                                         |      | 733.64  | 1465.26 | 1463.68 | 65.89   | 0.00025  | LSEKDEEMEQVK       |                          |
|   |              |                                                         |      | 738.67  | 1475.32 | 1473.68 | 90.98   | 8.00E-07 | VEELEEELEAER       |                          |
|   |              |                                                         |      | 749.34  | 1496.67 | 1495.73 | 47.12   | 0.018    | KLQHELDEAEER       |                          |
|   |              |                                                         |      | 750.83  | 1499.65 | 1499.75 | 102.22  | 5.70E-08 | LQEAEAVEAVNAK      |                          |
|   |              |                                                         |      | 752.68  | 1503.34 | 1502.76 | 91.89   | 6.50E-07 | ENQSILITGESGAGK    |                          |
|   |              |                                                         |      | 770.85  | 1539.68 | 1539.77 | 62.84   | 0.00049  | DYHIFYQILSNK       |                          |
|   |              |                                                         |      | 1543.82 | 1542.81 | 1542.83 | 88.50   | 1.40E-06 | KLAEQELLDVTER      |                          |
|   |              |                                                         |      | 772.48  | 1542.94 | 1541.83 | 49.13   | 0.012    | IDDEQSIIIQLQK      |                          |
|   |              |                                                         |      | 772.63  | 1543.25 | 1542.83 | 87.98   | 1.60E-06 | KLAEQELLDVTER      |                          |
|   |              |                                                         |      | 773.15  | 1544.28 | 1542.83 | 81.30   | 7.50E-06 | KLAEQELLDVTER      |                          |
|   |              |                                                         |      | 802.71  | 1603.40 | 1602.78 | 81.83   | 6.60E-06 | SNDDLKENTAIVER     |                          |
|   |              |                                                         |      | 806.37  | 1610.72 | 1610.75 | 74.36   | 3.50E-05 | AAEESSEEQANVHLGK   |                          |
|   |              |                                                         |      | 810.77  | 1619.52 | 1619.78 | 62.50   | 0.00055  | LSEKDEEMEQVKR      |                          |
|   |              |                                                         |      | 812.45  | 1622.88 | 1620.72 | 56.59   | 0.0021   | LEDEEEMNAELTAK     |                          |
|   |              |                                                         |      | 816.69  | 1631.36 | 1631.78 | 82.84   | 5.40E-06 | LEEAGGATAAQIEMNK   |                          |
|   |              |                                                         |      | 824.64  | 1647.26 | 1645.82 | 101.28  | 7.60E-08 | NLTEEMAALDDIIAK    |                          |
|   |              |                                                         |      | 843.61  | 1685.21 | 1684.83 | 51.88   | 0.0063   | LELDDVASSMEHIVK    |                          |
|   |              |                                                         |      | 846.74  | 1691.46 | 1688.88 | 86.26   | 2.40E-06 | GQNVQQVNYAIGALSK   |                          |
|   |              |                                                         |      | 852.23  | 1702.45 | 1701.82 | 84.74   | 3.10E-06 | LQNEIEDLMVDVER     |                          |
|   |              |                                                         |      | 859.79  | 1717.56 | 1717.85 | 96.85   | 2.00E-07 | NEDPLNETVVGLYQK    |                          |
|   |              |                                                         |      | 861.94  | 1721.86 | 1721.94 | 81.68   | 6.60E-06 | VQLLHSQNTSLINQK    |                          |
|   |              |                                                         |      | 895.79  | 1789.56 | 1786.87 | 89.81   | 1.00E-06 | TIDTLQSALESETHSR   |                          |
|   |              |                                                         |      | 896.63  | 1791.24 | 1790.76 | 101.34  | 7.20E-08 | QREEQAEADGTEDADK   |                          |
|   |              |                                                         |      | 930.22  | 1858.43 | 1858.88 | 83.59   | 3.90E-06 | LEQQVDDLEGSLEQEK   |                          |
|   |              |                                                         |      | 935.63  | 1869.25 | 1867.93 | 118.69  | 1.20E-09 | DLEEATLQHEATAATLR  |                          |
|   |              |                                                         |      | 980.80  | 1959.58 | 1957.98 | 95.64   | 2.40E-07 | ILQEEISDLTEQLGEGGK |                          |
|   |              |                                                         |      | 994.76  | 1987.50 | 1986.97 | 80.63   | 7.40E-06 | LEQQVDDLEGSLEQEKK  |                          |
|   |              |                                                         |      | 676.68  | 2027.00 | 2024.03 | 61.34   | 0.0006   | RDLEEATLQHEATAATLR |                          |
|   |              |                                                         |      | 696.78  | 2087.32 | 2086.04 | 53.87   | 0.0034   | VKLEQQVDDLEGSLEQEK |                          |
| 5 | gj 169403947 | glyceraldehyde-3-phosphate dehydrogenase [Danio rerio   | 63.4 | 333     | 693.68  | 1385.34 | 1384.73 | 88.31    | 1.50E-06           | GASQNIIPASTGAAK          |
|   |              |                                                         |      |         | 748.77  | 1495.53 | 1494.84 | 79.92    | 9.50E-06           | VPTPNVSVVDLTVR           |
|   |              |                                                         |      |         | 787.60  | 1573.18 | 1571.83 | 60.74    | 0.00088            | LVIDGHAITVYSER           |
|   |              |                                                         |      |         | 882.39  | 1762.77 | 1762.80 | 51.00    | 0.0078             | LVTWYDNEFGYSNR           |
|   |              |                                                         |      |         | 930.86  | 1859.70 | 1860.94 | 111.65   | 6.20E-09           | SSIFDAGAGIALNDHFVK       |
|   |              |                                                         |      |         | 1105.96 | 2209.91 | 2210.17 | 49.58    | 0.0089             | LVIDGHAITVYSERDPANIK     |
|   |              |                                                         |      |         | 1116.33 | 2230.64 | 2230.08 | 140.10   | 7.80E-12           | WGDAGATYVVESTGVFTTIEK    |
|   |              |                                                         |      |         | 1301.52 | 2601.03 | 2599.37 | 84.74    | 2.40E-06           | VINDNFVIVEGLMSTVHAITATQK |
| 6 | gj 116325975 | ATP synthase, H+ transporting, mitochondrial F1 comple: | 60.3 | 551     | 555.35  | 1108.68 | 1108.51 | 51.81    | 0.0067             | RFNEGTEEK                |
|   |              |                                                         |      |         | 600.61  | 1199.21 | 1196.64 | 55.34    | 0.0032             | VVDALGNPIDGK             |
|   |              |                                                         |      |         | 645.62  | 1289.23 | 1286.69 | 66.41    | 0.00025            | HALIYDDLK                |
|   |              |                                                         |      |         | 651.16  | 1300.30 | 1299.74 | 84.49    | 3.70E-06           | TAIAIDTIINQK             |



|    |              |                                                         |      |         |         |         |         |          |                        |                         |
|----|--------------|---------------------------------------------------------|------|---------|---------|---------|---------|----------|------------------------|-------------------------|
|    |              |                                                         |      | 682.43  | 1362.84 | 1362.69 | 79.10   | 1.20E-05 | TGTAEVSSILEEK          |                         |
|    |              |                                                         |      | 720.33  | 1438.65 | 1437.84 | 41.57   | 0.067    | GIRPAINVGLSVSR         |                         |
|    |              |                                                         |      | 766.41  | 1530.80 | 1530.75 | 116.75  | 2.20E-09 | ILGADTGAELEETGR        |                         |
|    |              |                                                         |      | 813.24  | 1624.46 | 1623.88 | 87.21   | 1.80E-06 | TGAIVDVPVGEELLGR       |                         |
|    |              |                                                         |      | 1030.47 | 2058.93 | 2059.13 | 90.44   | 7.60E-07 | AFLQHVISQHQDLLAAIR     |                         |
|    |              |                                                         |      | 1052.89 | 2103.76 | 2103.03 | 81.26   | 6.40E-06 | GMSLNLEPDNVGVVVFVFNNDK |                         |
|    |              |                                                         |      | 1156.38 | 2310.75 | 2308.15 | 46.53   | 0.018    | QGQYSPMAIEEQVAVIYAGVR  |                         |
|    |              |                                                         |      | 1183.60 | 2365.19 | 2364.17 | 65.54   | 0.00022  | EVAFAQFGSDLDAATQQLLNR  |                         |
| 7  | gi 18858329  | ba1 globin [Danio rerio]                                | 79.1 | 148     | 480.00  | 957.99  | 957.56  | 46.94    | 0.025                  | TAILGLWGK               |
|    |              |                                                         |      |         | 713.68  | 1425.34 | 1424.76 | 95.35    | 2.80E-07               | LNIDEIGPQALSR           |
|    |              |                                                         |      |         | 725.33  | 1448.65 | 1449.69 | 87.32    | 1.90E-06               | NTYAALSVMHSEK           |
|    |              |                                                         |      |         | 897.94  | 1793.87 | 1794.83 | 116.77   | 1.90E-09               | FGQAGFNADVQEAQWQK       |
|    |              |                                                         |      |         | 994.87  | 1987.72 | 1984.97 | 87.00    | 1.70E-06               | YFATFGNLSSPAAIMGNPK     |
| 8  | gi 163644331 | ventricular myosin heavy chain [Danio rerio]            | 44.6 | 1938    | 699.39  | 698.38  | 698.33  | 40.99    | 0.077                  | HATENK                  |
|    |              |                                                         |      |         | 1074.55 | 1073.54 | 1073.54 | 51.70    | 0.0085                 | ADIAESQVVK              |
|    |              |                                                         |      |         | 609.12  | 1216.22 | 1215.63 | 46.69    | 0.025                  | AGLLGQLEEMR             |
|    |              |                                                         |      |         | 614.04  | 1226.07 | 1223.61 | 44.28    | 0.039                  | TKYETDAIQR              |
|    |              |                                                         |      |         | 624.15  | 1246.28 | 1244.65 | 73.73    | 4.80E-05               | DIDDLELTLAK             |
|    |              |                                                         |      |         | 662.12  | 1322.23 | 1320.66 | 65.34    | 0.00029                | KLEDECSELKK             |
|    |              |                                                         |      |         | 1368.62 | 1367.61 | 1367.63 | 55.83    | 0.0025                 | IQHELDEAEER             |
|    |              |                                                         |      |         | 733.28  | 1464.55 | 1464.77 | 90.20    | 9.20E-07               | LASADIETYLLEK           |
|    |              |                                                         |      |         | 749.34  | 1496.67 | 1495.73 | 47.12    | 0.018                  | KIQHELDEAEER            |
|    |              |                                                         |      |         | 752.68  | 1503.34 | 1502.76 | 91.89    | 6.50E-07               | ENQSILITGESGAGK         |
|    |              |                                                         |      |         | 812.45  | 1622.88 | 1620.72 | 56.59    | 0.0021                 | LEDEEEMNAELTAK          |
|    |              |                                                         |      |         | 816.69  | 1631.36 | 1631.78 | 82.84    | 5.40E-06               | LEEAGGATAAQIEMNK        |
|    |              |                                                         |      |         | 824.64  | 1647.26 | 1645.82 | 101.28   | 7.60E-08               | NLTEEMAALDDIIAK         |
|    |              |                                                         |      |         | 861.94  | 1721.86 | 1721.94 | 81.68    | 6.60E-06               | VQLLHSQNTSLLNQK         |
|    |              |                                                         |      |         | 930.22  | 1858.43 | 1858.88 | 83.59    | 3.90E-06               | LEQQVDDLEGSLEQEK        |
|    |              |                                                         |      |         | 935.63  | 1869.25 | 1867.93 | 118.69   | 1.20E-09               | DLEEATLQHEATAATLR       |
|    |              |                                                         |      |         | 980.80  | 1959.58 | 1958.94 | 88.78    | 1.10E-06               | NLQEEISDLTEQLGEGGK      |
|    |              |                                                         |      |         | 994.76  | 1987.50 | 1986.97 | 80.63    | 7.40E-06               | LEQQVDDLEGSLEQEKK       |
|    |              |                                                         |      |         | 676.68  | 2027.00 | 2024.03 | 61.34    | 0.0006                 | RDLEEATLQHEATAATLR      |
|    |              |                                                         |      |         | 1100.81 | 2199.61 | 2199.12 | 88.83    | 1.10E-06               | GTLEDQIIQANPALEAFGNAK   |
|    |              |                                                         |      |         | 1163.71 | 2325.40 | 2325.11 | 68.24    | 0.00012                | KALQEAHQQTLLDDLQSEEDK   |
|    |              |                                                         |      |         | 790.32  | 2367.93 | 2366.12 | 47.04    | 0.016                  | LQQFFNHMHFVLEQEEYK      |
|    |              |                                                         |      |         | 1427.67 | 2853.33 | 2853.40 | 73.52    | 2.80E-05               | ALQEAHQQTLLDDLQSEEDKVNT |
| 9  | gi 55926111  | cardiac myosin light chain-1 [Danio rerio]              | 79.6 | 196     | 966.89  | 965.88  | 966.55  | 56.68    | 0.0021                 | HVLATLGEK               |
|    |              |                                                         |      |         | 781.14  | 1560.27 | 1559.82 | 71.73    | 6.70E-05               | KEEAPAPAPVPETPK         |
|    |              |                                                         |      |         | 851.66  | 1701.30 | 1700.76 | 74.67    | 3.20E-05               | DAFTLFDPTGEMK           |
|    |              |                                                         |      |         | 856.49  | 1710.96 | 1710.82 | 92.16    | 5.60E-07               | AKDQGTDFDFVEGLR         |
|    |              |                                                         |      |         | 891.17  | 1780.32 | 1777.85 | 71.23    | 7.20E-05               | SVPLDFSPDQIEEFR         |
|    |              |                                                         |      |         | 972.50  | 1942.98 | 1944.08 | 90.30    | 7.90E-07               | ALGHNPTNADVLTVLGKPK     |
|    |              |                                                         |      |         | 1186.43 | 2370.84 | 2370.23 | 75.39    | 2.30E-05               | KEEAPAPAPVPETPKPEVDLK   |
| 10 | gi 29725603  | myosin, light polypeptide 7, regulatory [Danio rerio]   | 74.4 | 172     | 638.69  | 1275.36 | 1273.67 | 65.53    | 0.0003                 | LFDPNATGVVVK            |
|    |              |                                                         |      |         | 690.02  | 1378.03 | 1377.66 | 55.55    | 0.0027                 | SLCYIITHGDEK            |
|    |              |                                                         |      |         | 809.36  | 1616.70 | 1617.83 | 57.27    | 0.0018                 | LNGTDPEETILAAFK         |
|    |              |                                                         |      |         | 1795.81 | 1794.80 | 1792.84 | 40.43    | 0.083                  | LNVSDEELESMLTEGK        |
|    |              |                                                         |      |         | 1046.59 | 2091.17 | 2091.96 | 85.68    | 2.30E-06               | GSSNVFSMFEQSQIQEFK      |
|    |              |                                                         |      |         | 1292.61 | 2583.21 | 2582.25 | 108.90   | 9.00E-09               | FTAAEVDQAFVAPIDVAGNIDY  |
| 11 | gi 189525553 | PREDICTED: hypothetical protein LOC336197 [Danio rerio] | 75.4 | 517     | 488.39  | 974.76  | 974.55  | 41.25    | 0.095                  | IGLFGGAGVGK             |
|    |              |                                                         |      |         | 1406.84 | 1405.83 | 1405.67 | 77.72    | 1.70E-05               | AHGGYSVFAGVGER          |
|    |              |                                                         |      |         | 718.59  | 1435.16 | 1434.75 | 102.43   | 5.70E-08               | FTQAGSEVSALLGR          |

|    |              |                                                         |      |         |         |         |         |          |                          |                          |
|----|--------------|---------------------------------------------------------|------|---------|---------|---------|---------|----------|--------------------------|--------------------------|
|    |              |                                                         |      | 729.47  | 1456.93 | 1456.83 | 90.05   | 9.90E-07 | TVLIMELINNVAK            |                          |
|    |              |                                                         |      | 839.67  | 1677.33 | 1676.92 | 83.08   | 5.00E-06 | LVLEVAQHLGENTVR          |                          |
|    |              |                                                         |      | 994.51  | 1987.00 | 1987.03 | 85.12   | 2.60E-06 | AIAELGIYPAVDPLDSTSR      |                          |
|    |              |                                                         |      | 1003.03 | 2004.05 | 2004.05 | 112.09  | 5.20E-09 | FLSQPFQVAEVFTGHLGK       |                          |
|    |              |                                                         |      | 687.82  | 2060.42 | 2059.99 | 42.32   | 0.049    | EGNDLYHEMIESGVINLK       |                          |
|    |              |                                                         |      | 1329.90 | 2657.78 | 2658.38 | 94.91   | 2.30E-07 | SLQDIIAILGMDELSEEDKLTVAR |                          |
|    |              |                                                         |      | 1282.42 | 3844.24 | 3841.97 | 68.79   | 5.70E-05 | KGSITSVQAIYVPADDLTDPPAPA |                          |
| 12 | gi 18858539  | desmin [Danio rerio]                                    | 55.2 | 473     | 445.53  | 889.04  | 887.48  | 40.63    | 0.11                     | SRVEIER                  |
|    |              |                                                         |      |         | 541.10  | 1080.18 | 1079.54 | 46.55    | 0.023                    | ASGSFSGGSVVR             |
|    |              |                                                         |      |         | 558.63  | 1115.25 | 1114.57 | 66.66    | 0.00026                  | GQVEALTNQR               |
|    |              |                                                         |      |         | 591.00  | 1179.98 | 1179.55 | 52.94    | 0.0052                   | EAGGYQDTIAR              |
|    |              |                                                         |      |         | 1254.61 | 1253.60 | 1253.56 | 42.27    | 0.058                    | NISEAEDWYK               |
|    |              |                                                         |      |         | 888.78  | 1775.55 | 1775.91 | 99.94    | 1.00E-07                 | FLEQQNSALTVEIER          |
|    |              |                                                         |      |         | 990.94  | 1979.86 | 1978.97 | 94.70    | 2.90E-07                 | LDNFLADAINQDFLNTR        |
|    |              |                                                         |      |         | 1094.25 | 2186.48 | 2186.00 | 133.47   | 3.80E-11                 | TFGSGLGSSIFAGHGSSGSSGS   |
| 13 | gi 66773080  | ATP synthase, H+ transporting, mitochondrial F1 comple: | 70.8 | 517     | 488.39  | 974.76  | 974.55  | 41.25    | 0.095                    | IGLFGGAGVGK              |
|    |              |                                                         |      |         | 1406.84 | 1405.83 | 1405.67 | 77.72    | 1.70E-05                 | AHGGYSVFAGVGER           |
|    |              |                                                         |      |         | 718.59  | 1435.16 | 1434.75 | 102.43   | 5.70E-08                 | FTQAGSEVSALLGR           |
|    |              |                                                         |      |         | 729.47  | 1456.93 | 1456.83 | 90.05    | 9.90E-07                 | TVLIMELINNVAK            |
|    |              |                                                         |      |         | 839.67  | 1677.33 | 1676.92 | 83.08    | 5.00E-06                 | LVLEVAQHLGENTVR          |
|    |              |                                                         |      |         | 994.51  | 1987.00 | 1987.03 | 85.12    | 2.60E-06                 | AIAELGIYPAVDPLDSTSR      |
|    |              |                                                         |      |         | 1003.03 | 2004.05 | 2004.05 | 112.09   | 5.20E-09                 | FLSQPFQVAEVFTGHLGK       |
|    |              |                                                         |      |         | 687.82  | 2060.42 | 2059.99 | 42.32    | 0.049                    | EGNDLYHEMIESGVINLK       |
|    |              |                                                         |      |         | 1282.42 | 3844.24 | 3841.97 | 68.79    | 5.70E-05                 | KGSITSVQAIYVPADDLTDPPAPA |
| 14 | gi 70778800  | actin, alpha, cardiac muscle [Danio rerio]              | 58.9 | 377     | 488.23  | 974.45  | 975.44  | 46.37    | 0.03                     | AGFAGDDAPR               |
|    |              |                                                         |      |         | 896.27  | 1790.52 | 1789.88 | 98.03    | 1.50E-07                 | SYELPDGQVITIGNER         |
|    |              |                                                         |      |         | 978.36  | 1954.70 | 1955.04 | 95.38    | 2.50E-07                 | VAPEEHPTLLTEAPLNPK       |
|    |              |                                                         |      |         | 1115.49 | 2228.97 | 2227.06 | 77.92    | 1.30E-05                 | DLYANNVLSGGTTMYPGIADR    |
|    |              |                                                         |      |         | 1067.01 | 3197.99 | 3195.60 | 47.46    | 0.01                     | TTGIVLDSGDGVTHNVPIYEGYA  |
| 15 | gi 62955473  | hypothetical protein LOC550445 [Danio rerio]            | 58.1 | 377     | 488.23  | 974.45  | 975.44  | 46.37    | 0.03                     | AGFAGDDAPR               |
|    |              |                                                         |      |         | 896.27  | 1790.52 | 1789.88 | 98.03    | 1.50E-07                 | SYELPDGQVITIGNER         |
|    |              |                                                         |      |         | 978.36  | 1954.70 | 1955.04 | 95.38    | 2.50E-07                 | VAPEEHPTLLTEAPLNPK       |
|    |              |                                                         |      |         | 1115.49 | 2228.97 | 2227.06 | 77.92    | 1.30E-05                 | DLYANNVLSGGTTMYPGIADR    |
|    |              |                                                         |      |         | 1067.01 | 3197.99 | 3195.60 | 47.46    | 0.01                     | TTGIVLDSGDGVTHNVPIYEGYA  |
| 16 | gi 23097290  | troponin T2, cardiac [Danio rerio]                      | 38.3 | 282     | 509.03  | 1016.05 | 1015.47 | 58.74    | 0.0017                   | VDFDDIHR                 |
|    |              |                                                         |      |         | 1217.73 | 1216.72 | 1216.66 | 46.97    | 0.023                    | KEEEEEIISLK              |
|    |              |                                                         |      |         | 673.42  | 1344.83 | 1344.75 | 59.81    | 0.0011                   | KKEEEEEIISLK             |
|    |              |                                                         |      |         | 957.35  | 1912.69 | 1913.95 | 95.06    | 2.70E-07                 | DLNELQTLIEAHFESR         |
| 17 | gi 189540220 | PREDICTED: hypothetical protein LOC393472 [Danio rerio] | 48.5 | 1937    | 699.39  | 698.38  | 698.33  | 40.99    | 0.077                    | HATENK                   |
|    |              |                                                         |      |         | 1074.55 | 1073.54 | 1073.54 | 51.70    | 0.0085                   | ADIAESQVNK               |
|    |              |                                                         |      |         | 614.04  | 1226.07 | 1223.61 | 44.28    | 0.039                    | TKYETDAIQR               |
|    |              |                                                         |      |         | 624.15  | 1246.28 | 1244.65 | 73.73    | 4.80E-05                 | DIDDLELTLAK              |
|    |              |                                                         |      |         | 662.12  | 1322.23 | 1320.66 | 65.34    | 0.00029                  | KLEDECSELKK              |
|    |              |                                                         |      |         | 733.28  | 1464.55 | 1464.77 | 90.20    | 9.20E-07                 | LASADIETYLLEK            |
|    |              |                                                         |      |         | 752.68  | 1503.34 | 1502.76 | 91.89    | 6.50E-07                 | ENQSILITGESGAGK          |
|    |              |                                                         |      |         | 816.69  | 1631.36 | 1631.78 | 82.84    | 5.40E-06                 | LEEAGGATAAQIEMNK         |
|    |              |                                                         |      |         | 928.91  | 1855.81 | 1853.91 | 74.52    | 3.10E-05                 | DLEESTLQHEATAAALR        |
|    |              |                                                         |      |         | 930.22  | 1858.43 | 1858.88 | 83.59    | 3.90E-06                 | LEQQVDDLEGSLEQEK         |
|    |              |                                                         |      |         | 994.76  | 1987.50 | 1986.97 | 80.63    | 7.40E-06                 | LEQQVDDLEGSLEQEKK        |
|    |              |                                                         |      |         | 790.32  | 2367.93 | 2366.12 | 47.04    | 0.016                    | LQQFFNHMHFVLEQEEYK       |
| 18 | gi 189523697 | PREDICTED: im:6911926 [Danio rerio]                     | 46.9 | 28836   | 701.17  | 1400.33 | 1399.71 | 64.53    | 0.00036                  | HVSVEALDFIDR             |
|    |              |                                                         |      |         | 738.17  | 1474.33 | 1473.71 | 56.64    | 0.0022                   | RLDETDEAQLER             |

|    |              |                                                          |      |         |         |         |         |          |                         |                      |
|----|--------------|----------------------------------------------------------|------|---------|---------|---------|---------|----------|-------------------------|----------------------|
|    |              |                                                          |      | 772.58  | 1543.15 | 1541.72 | 71.52   | 7.10E-05 | NDGGAPVTHYNIER          |                      |
|    |              |                                                          |      | 787.22  | 1572.42 | 1572.78 | 45.27   | 0.031    | FGQSGPSEPSGPVVTK        |                      |
|    |              |                                                          |      | 807.77  | 1613.53 | 1612.87 | 43.79   | 0.04     | ALDPVFKPGPPHNP          |                      |
|    |              |                                                          |      | 856.64  | 1711.26 | 1709.82 | 63.47   | 0.00041  | ADSGNYTITIQNAAGSK       |                      |
|    |              |                                                          |      | 894.75  | 1787.49 | 1787.83 | 55.94   | 0.0025   | GENKVDVEYDEHINK         |                      |
|    |              |                                                          |      | 920.70  | 1839.38 | 1838.93 | 41.66   | 0.061    | STVSLAWEKPLHDGGS        |                      |
|    |              |                                                          |      | 923.92  | 1845.82 | 1845.01 | 55.76   | 0.0024   | VQILDKPGPPAGHIEFK       |                      |
|    |              |                                                          |      | 928.62  | 1855.22 | 1854.92 | 96.97   | 1.80E-07 | TSVSLSWEKPIHDGGS        |                      |
|    |              |                                                          |      | 932.27  | 1862.52 | 1860.85 | 50.26   | 0.0085   | NAQPDDVAEYAVEVEGR       |                      |
|    |              |                                                          |      | 935.34  | 1868.66 | 1867.88 | 48.75   | 0.012    | TSADLQWTRPEHDGGA        |                      |
|    |              |                                                          |      | 950.65  | 1899.28 | 1898.91 | 73.18   | 4.20E-05 | TTVTLSEKPEHDGGS         |                      |
|    |              |                                                          |      | 971.98  | 1941.94 | 1941.02 | 49.42   | 0.0096   | IGESFEIDVPISGRPTK       |                      |
|    |              |                                                          |      | 1002.92 | 2003.83 | 2002.96 | 91.81   | 5.50E-07 | KDNTSDDIGWVTSTHK        |                      |
|    |              |                                                          |      | 1033.83 | 2065.64 | 2064.06 | 76.98   | 1.70E-05 | VISGVQDLEYTVTDVIEGK     |                      |
|    |              |                                                          |      | 1047.30 | 2092.59 | 2092.08 | 59.72   | 0.0009   | INVSALNSEGVGEAAPVPGSPK  |                      |
|    |              |                                                          |      | 1073.16 | 2144.30 | 2142.23 | 64.16   | 0.00032  | SFHVQVITLGPPSKPIGPIR    |                      |
|    |              |                                                          |      | 742.60  | 2224.76 | 2222.18 | 45.25   | 0.025    | VTAENEIGTGDPSVPSKPIAK   |                      |
|    |              |                                                          |      | 757.52  | 2269.52 | 2270.33 | 62.36   | 0.00047  | KSFHVQVITLGPPSKPIGPIR   |                      |
|    |              |                                                          |      | 1258.45 | 2514.89 | 2514.23 | 109.45  | 8.10E-09 | HTLPVDSDISSDTSVVTIPES   |                      |
|    |              |                                                          |      | 1326.96 | 2651.91 | 2651.51 | 61.01   | 0.00054  | KKPTLPATILTKPQSLTVSEGES |                      |
|    |              |                                                          |      | 966.81  | 2897.40 | 2895.47 | 44.42   | 0.022    | RLDIIDTDTSVTLAWLKPEHDG  |                      |
| 19 | gj 66472732  | myosin heavy chain 4 [Danio rerio]                       | 47.7 | 1935    | 699.39  | 698.38  | 698.33  | 40.99    | 0.077                   | HATENK               |
|    |              |                                                          |      |         | 614.04  | 1226.07 | 1223.61 | 44.28    | 0.039                   | TKYETDAIQR           |
|    |              |                                                          |      |         | 624.15  | 1246.28 | 1244.65 | 73.73    | 4.80E-05                | DIDDLELTLAK          |
|    |              |                                                          |      |         | 662.12  | 1322.23 | 1320.66 | 65.34    | 0.00029                 | KLEDECSELKK          |
|    |              |                                                          |      |         | 733.28  | 1464.55 | 1464.77 | 90.20    | 9.20E-07                | LASADIETYLLEK        |
|    |              |                                                          |      |         | 745.69  | 1489.36 | 1488.74 | 65.97    | 0.00026                 | ENQSVLITGESGAGK      |
|    |              |                                                          |      |         | 816.69  | 1631.36 | 1631.78 | 82.84    | 5.40E-06                | LEEAGGATAAQIEMNK     |
|    |              |                                                          |      |         | 928.91  | 1855.81 | 1853.91 | 74.52    | 3.10E-05                | DLEESTLQHEATAAALR    |
|    |              |                                                          |      |         | 930.22  | 1858.43 | 1858.88 | 83.59    | 3.90E-06                | LEQQVDDLEGSLEQEK     |
|    |              |                                                          |      |         | 994.76  | 1987.50 | 1986.97 | 80.63    | 7.40E-06                | LEQQVDDLEGSLEQEKK    |
|    |              |                                                          |      |         | 696.78  | 2087.32 | 2088.02 | 50.20    | 0.008                   | TKLEQQVDDLEGSLEQEK   |
|    |              |                                                          |      |         | 1107.82 | 2213.62 | 2213.03 | 72.78    | 4.30E-05                | AEIQTALAEAEGTLEHEESK |
|    |              |                                                          |      |         | 1107.97 | 2213.93 | 2216.12 | 46.28    | 0.019                   | TKLEQQVDDLEGSLEQEKK  |
|    |              |                                                          |      |         | 790.32  | 2367.93 | 2366.12 | 47.04    | 0.016                   | LQQFFNHMHFVLEQEEYK   |
| 20 | gj 189519129 | PREDICTED: similar to myosin heavy chain 4 [Danio rerio] | 46.8 | 1933    | 699.39  | 698.38  | 698.33  | 40.99    | 0.077                   | HATENK               |
|    |              |                                                          |      |         | 614.04  | 1226.07 | 1223.61 | 44.28    | 0.039                   | TKYETDAIQR           |
|    |              |                                                          |      |         | 624.15  | 1246.28 | 1244.65 | 73.73    | 4.80E-05                | DIDDLELTLAK          |
|    |              |                                                          |      |         | 662.12  | 1322.23 | 1320.66 | 65.34    | 0.00029                 | KLEDECSELKK          |
|    |              |                                                          |      |         | 733.28  | 1464.55 | 1464.77 | 90.20    | 9.20E-07                | LASADIETYLLEK        |
|    |              |                                                          |      |         | 745.69  | 1489.36 | 1488.74 | 65.97    | 0.00026                 | ENQSVLITGESGAGK      |
|    |              |                                                          |      |         | 816.69  | 1631.36 | 1631.78 | 82.84    | 5.40E-06                | LEEAGGATAAQIEMNK     |
|    |              |                                                          |      |         | 928.91  | 1855.81 | 1853.91 | 74.52    | 3.10E-05                | DLEESTLQHEATAAALR    |
|    |              |                                                          |      |         | 930.22  | 1858.43 | 1858.88 | 83.59    | 3.90E-06                | LEQQVDDLEGSLEQEK     |
|    |              |                                                          |      |         | 994.76  | 1987.50 | 1986.97 | 80.63    | 7.40E-06                | LEQQVDDLEGSLEQEKK    |
|    |              |                                                          |      |         | 696.78  | 2087.32 | 2088.02 | 50.20    | 0.008                   | TKLEQQVDDLEGSLEQEK   |
|    |              |                                                          |      |         | 1107.82 | 2213.62 | 2213.03 | 72.78    | 4.30E-05                | AEIQTALAEAEGTLEHEESK |
|    |              |                                                          |      |         | 1107.97 | 2213.93 | 2216.12 | 46.28    | 0.019                   | TKLEQQVDDLEGSLEQEKK  |
|    |              |                                                          |      |         | 790.32  | 2367.93 | 2366.12 | 47.04    | 0.016                   | LQQFFNHMHFVLEQEEYK   |
| 21 | gj 189537429 | PREDICTED: hypothetical protein [Danio rerio]            | 63.9 | 377     | 488.23  | 974.45  | 975.44  | 46.37    | 0.03                    | AGFAGDDAPR           |
|    |              |                                                          |      |         | 896.27  | 1790.52 | 1789.88 | 98.03    | 1.50E-07                | SYELPDGQVITIGNER     |
|    |              |                                                          |      |         | 977.46  | 1952.91 | 1953.06 | 79.89    | 8.60E-06                | VAPPEHPVLLTEAPLNPK   |

|    |              |                                                |      |       |         |         |         |        |          |                          |
|----|--------------|------------------------------------------------|------|-------|---------|---------|---------|--------|----------|--------------------------|
| 22 | gi 83025080  | actinin, alpha 2 [Danio rerio]                 | 48.9 | 895   | 717.70  | 1433.39 | 1432.71 | 40.30  | 0.094    | ISNRPAFMPSEGK            |
|    |              |                                                |      |       | 761.94  | 1521.86 | 1520.71 | 64.59  | 0.00033  | AGTQIENIEEDFR            |
|    |              |                                                |      |       | 821.59  | 1641.17 | 1640.72 | 81.70  | 6.40E-06 | HEAFESDLSAHQDR           |
|    |              |                                                |      |       | 826.70  | 1651.38 | 1648.81 | 54.98  | 0.0031   | KAGTQIENIEEDFR           |
|    |              |                                                |      |       | 842.04  | 1682.07 | 1680.90 | 75.94  | 2.40E-05 | LLETVDQLFLEYAK           |
|    |              |                                                |      |       | 885.69  | 1769.37 | 1768.81 | 68.26  | 0.00014  | KHEAFESDLSAHQDR          |
|    |              |                                                |      |       | 933.07  | 1864.13 | 1861.89 | 64.74  | 0.0003   | MVSDIASAWQGLEQAEK        |
|    |              |                                                |      |       | 968.96  | 1935.91 | 1934.98 | 100.27 | 8.10E-08 | GDLTNPYSTITAEIIAIK       |
|    |              |                                                |      |       | 1050.84 | 2099.67 | 2099.09 | 87.13  | 1.60E-06 | LNKDDPLGNLNLAFDIAEK      |
|    |              |                                                |      |       | 1099.44 | 1098.43 | 1098.53 | 56.37  | 0.0026   | NLIHGSDSEK               |
| 23 | gi 41053595  | nucleoside diphosphate kinase-Z2 [Danio rerio] | 86.3 | 153   | 554.51  | 1107.00 | 1106.56 | 66.61  | 0.00023  | FVQASEDLAK               |
|    |              |                                                |      |       | 974.87  | 1947.73 | 1949.07 | 126.73 | 1.80E-10 | GFRLVAAKFVQASEDLAK       |
|    |              |                                                |      |       | 1106.09 | 2210.17 | 2211.12 | 91.07  | 6.30E-07 | SAATEVSLWFKPEELVSYR      |
|    |              |                                                |      |       | 518.13  | 1034.24 | 1032.50 | 53.91  | 0.0047   | ASDLEELK                 |
| 24 | gi 66792936  | tropomyosin 4 isoform 1 [Danio rerio]          | 73.9 | 284   | 585.81  | 1169.61 | 1169.67 | 62.93  | 0.00053  | LVILEGELER               |
|    |              |                                                |      |       | 1182.60 | 1181.59 | 1181.55 | 44.09  | 0.039    | EDKYEEEEIK               |
|    |              |                                                |      |       | 622.64  | 1243.26 | 1242.65 | 73.35  | 5.20E-05 | IQLVEEELDR               |
|    |              |                                                |      |       | 629.66  | 1257.30 | 1256.66 | 60.54  | 0.00095  | QLDDELVGLQK              |
|    |              |                                                |      |       | 638.22  | 1274.42 | 1271.61 | 70.63  | 9.40E-05 | AADAEGDVAALNR            |
|    |              |                                                |      |       | 1298.67 | 1297.66 | 1297.76 | 56.35  | 0.0022   | KLVILEGELER              |
|    |              |                                                |      |       | 701.18  | 1400.34 | 1399.71 | 101.39 | 7.40E-08 | KAADAEGDVAALNR           |
|    |              |                                                |      |       | 770.64  | 1539.26 | 1537.71 | 73.76  | 4.00E-05 | SIDDLEDELYAQK            |
|    |              |                                                |      |       | 701.18  | 2100.51 | 2099.09 | 73.57  | 3.70E-05 | LELSEKKAADAEGDVAALNR     |
|    |              |                                                |      |       | 746.96  | 2237.85 | 2239.05 | 53.72  | 0.0034   | QTEDELDKYSEALKDAQEK      |
| 25 | gi 189540216 | PREDICTED: wu:fd14a01 [Danio rerio]            | 49.2 | 1936  | 699.39  | 698.38  | 698.33  | 40.99  | 0.077    | HATENK                   |
|    |              |                                                |      |       | 1074.55 | 1073.54 | 1073.54 | 51.70  | 0.0085   | ADIAESQVNK               |
|    |              |                                                |      |       | 614.04  | 1226.07 | 1223.61 | 44.28  | 0.039    | TKYETDAIQR               |
|    |              |                                                |      |       | 624.15  | 1246.28 | 1244.65 | 73.73  | 4.80E-05 | DIDDLELTLAK              |
|    |              |                                                |      |       | 662.12  | 1322.23 | 1320.66 | 65.34  | 0.00029  | KLEDECSELKK              |
|    |              |                                                |      |       | 733.28  | 1464.55 | 1464.77 | 90.20  | 9.20E-07 | LASADIETYLLEK            |
|    |              |                                                |      |       | 745.69  | 1489.36 | 1488.74 | 65.97  | 0.00026  | ENQSVLITGESGAGK          |
|    |              |                                                |      |       | 816.69  | 1631.36 | 1631.78 | 82.84  | 5.40E-06 | LEEAGGATAAQIEMNK         |
|    |              |                                                |      |       | 928.91  | 1855.81 | 1853.91 | 74.52  | 3.10E-05 | DLEESTLQHEATAAALR        |
|    |              |                                                |      |       | 930.22  | 1858.43 | 1858.88 | 83.59  | 3.90E-06 | LEQQVDDLEGSLEQEK         |
| 26 | gi 38707983  | aconitase 2, mitochondrial [Danio rerio]       | 51.8 | 782   | 994.76  | 1987.50 | 1986.97 | 80.63  | 7.40E-06 | LEQQVDDLEGSLEQEKK        |
|    |              |                                                |      |       | 790.32  | 2367.93 | 2366.12 | 47.04  | 0.016    | LQQFFNHMHFVLEQEEYK       |
|    |              |                                                |      |       | 1362.60 | 1361.59 | 1361.61 | 48.23  | 0.015    | FEPSSYINYDK              |
|    |              |                                                |      |       | 848.96  | 1695.90 | 1694.78 | 47.33  | 0.018    | FNPETDYLTAPNGEK          |
|    |              |                                                |      |       | 857.36  | 1712.71 | 1711.84 | 91.07  | 7.30E-07 | EVNQEVYSFLASAGAK         |
|    |              |                                                |      |       | 878.73  | 1755.45 | 1752.88 | 51.30  | 0.0069   | IVYGHLDPPAGQEIAR         |
|    |              |                                                |      |       | 890.73  | 1779.44 | 1777.89 | 40.99  | 0.078    | QGLLPLTFSNPADYDK         |
|    |              |                                                |      |       | 1042.22 | 2082.42 | 2080.94 | 98.48  | 1.20E-07 | NNISWVVVDENYEGESSR       |
|    |              |                                                |      |       | 1267.59 | 2533.16 | 2532.29 | 83.06  | 3.50E-06 | GHLDNISNLLIGAVNIENDGVN   |
|    |              |                                                |      |       | 1362.50 | 2722.98 | 2721.43 | 68.33  | 9.60E-05 | NDANPATHAFVTSPEIVTALAIAK |
| 27 | gi 47085883  | hypothetical protein LOC406405 [Danio rerio]   | 79.5 | 337   | 538.47  | 1074.93 | 1072.58 | 56.67  | 0.0026   | IQEAGTEVVK               |
|    |              |                                                |      |       | 661.99  | 1321.96 | 1319.67 | 84.23  | 3.70E-06 | GYIGADQLGDALK            |
|    |              |                                                |      |       | 752.74  | 1503.47 | 1502.77 | 94.91  | 3.30E-07 | VEFPADQLSALTGR           |
| 28 | gi 189523699 | PREDICTED: titin a [Danio rerio]               | 46.8 | 32757 | 1030.54 | 3088.58 | 3088.58 | 95.29  | 1.80E-07 | NSPLVSELSLFDIAHTPGVAADL  |
|    |              |                                                |      |       | 567.69  | 1133.36 | 1133.57 | 50.68  | 0.0096   | KGDVTLSDSGR              |
|    |              |                                                |      |       | 636.39  | 1270.77 | 1268.52 | 54.53  | 0.0038   | NYDEEVDETR               |
|    |              |                                                |      |       | 652.84  | 1303.66 | 1303.63 | 57.03  | 0.0021   | AVNEAGEIETSGK            |
|    |              |                                                |      |       | 666.15  | 1330.28 | 1328.66 | 54.57  | 0.0037   | SLVEDSQLPEGR             |

|    |              |                                                              |      |         |         |         |         |          |                          |                         |
|----|--------------|--------------------------------------------------------------|------|---------|---------|---------|---------|----------|--------------------------|-------------------------|
|    |              |                                                              |      | 718.53  | 1435.05 | 1434.70 | 50.80   | 0.0082   | YGVGPPLYSEPEK            |                         |
|    |              |                                                              |      | 907.47  | 1812.93 | 1811.95 | 39.91   | 0.092    | IGVGETADIPGSVIIEDK       |                         |
|    |              |                                                              |      | 915.70  | 1829.39 | 1828.83 | 47.26   | 0.017    | TTASLSWDKPDHDGGSR        |                         |
|    |              |                                                              |      | 940.81  | 1879.60 | 1878.92 | 73.48   | 3.90E-05 | TPLHDGGAEVSHYIVER        |                         |
|    |              |                                                              |      | 945.92  | 1889.83 | 1889.94 | 46.07   | 0.022    | NAAGLFSEPSESTGPVTVK      |                         |
|    |              |                                                              |      | 947.53  | 1893.04 | 1892.90 | 100.70  | 7.30E-08 | HTVTLSEKPDHDGGSK         |                         |
|    |              |                                                              |      | 975.71  | 1949.41 | 1948.02 | 49.13   | 0.01     | VLDVPGPPGPIEASSVSAEK     |                         |
|    |              |                                                              |      | 1015.41 | 2028.81 | 2029.15 | 70.81   | 6.80E-05 | KVPAKPVEAITVPTEEPPK      |                         |
|    |              |                                                              |      | 1079.59 | 2157.17 | 2157.24 | 74.29   | 3.10E-05 | KVPAKPVEAITVPTEEPPKK     |                         |
|    |              |                                                              |      | 1099.34 | 2196.66 | 2196.14 | 46.05   | 0.021    | VLDRPGPPDGPISYIGVTSEK    |                         |
|    |              |                                                              |      | 734.33  | 2199.95 | 2199.29 | 72.00   | 5.30E-05 | KEPKPESILQVISTPVPLPK     |                         |
|    |              |                                                              |      | 1133.89 | 2265.77 | 2265.23 | 56.10   | 0.002    | KEQHKPVVLSVNETTQTLK      |                         |
|    |              |                                                              |      | 1682.35 | 5044.02 | 5042.61 | 45.61   | 0.0064   | HQLQADQSSSLIPGLDSAISVQPL |                         |
| 29 | gi 47551317  | enolase 3, (beta, muscle) [Danio rerio]                      | 70.4 | 433     | 572.55  | 1143.09 | 1142.61 | 54.32    | 0.0042                   | IGAEVYHNLK              |
|    |              |                                                              |      |         | 687.75  | 1373.49 | 1372.70 | 48.62    | 0.014                    | HITGEQLGDLYK            |
|    |              |                                                              |      |         | 718.78  | 1435.54 | 1435.72 | 83.08    | 4.90E-06                 | GNPTVEVDLYTTK           |
|    |              |                                                              |      |         | 1053.85 | 2105.69 | 2104.07 | 109.40   | 9.80E-09                 | FTGSVDIQVVGDDLTVTNPK    |
|    |              |                                                              |      |         | 1060.42 | 2118.82 | 2118.12 | 86.64    | 1.80E-06                 | DVILPVPAPFNVIINGGSHAGNK |
| 30 | gi 189529246 | PREDICTED: hypothetical protein [Danio rerio]                | 63.9 | 119     | 530.06  | 1058.11 | 1056.56 | 89.53    | 1.40E-06                 | VAENVQELR               |
|    |              |                                                              |      |         | 701.10  | 1400.18 | 1399.67 | 54.77    | 0.0034                   | TMLEPYVQEYK             |
|    |              |                                                              |      |         | 1050.46 | 2098.90 | 2100.09 | 80.87    | 7.00E-06                 | ELTELGEQVKPHFEGIFK      |
|    |              |                                                              |      |         | 744.06  | 2229.14 | 2228.18 | 67.52    | 0.00014                  | KELTELGEQVKPHFEGIFK     |
| 31 | gi 18858961  | lactate dehydrogenase B4 [Danio rerio]                       | 70.1 | 334     | 603.57  | 1205.13 | 1204.61 | 51.19    | 0.0083                   | SSADTLWGIQK             |
|    |              |                                                              |      |         | 627.64  | 1253.27 | 1252.64 | 69.43    | 0.00011                  | MVVD SAYEVIK            |
|    |              |                                                              |      |         | 709.79  | 1417.56 | 1417.79 | 62.74    | 0.00055                  | LITPLASGPAEPPR          |
|    |              |                                                              |      |         | 769.81  | 1537.61 | 1537.77 | 83.72    | 4.00E-06                 | IVADKDYSVTANSR          |
|    |              |                                                              |      |         | 843.79  | 1685.56 | 1684.85 | 107.47   | 1.80E-08                 | ELADELALVDVVEDR         |
|    |              |                                                              |      |         | 858.16  | 1714.30 | 1714.82 | 48.64    | 0.013                    | LNPDIGTDKDAENWK         |
| 32 | gi 18858335  | bactin1 [Danio rerio]                                        | 51.7 | 375     | 488.23  | 974.45  | 975.44  | 46.37    | 0.03                     | AGFAGDDAPR              |
|    |              |                                                              |      |         | 896.27  | 1790.52 | 1789.88 | 98.03    | 1.50E-07                 | SYELPDGQVITIGNER        |
| 33 | gi 117606264 | sarcalumenin [Danio rerio]                                   | 41.7 | 482     | 957.14  | 1912.26 | 1912.97 | 52.75    | 0.0046                   | EEISLLEDLNQVIENR        |
|    |              |                                                              |      |         | 1036.33 | 2070.65 | 2069.08 | 98.98    | 1.10E-07                 | REEISLLEDLNQVIENR       |
| 34 | gi 189517521 | PREDICTED: hypothetical protein [Danio rerio]                | 67.1 | 143     | 768.07  | 1534.13 | 1532.73 | 97.00    | 1.90E-07                 | IASQADSIGQEAMGR         |
|    |              |                                                              |      |         | 934.49  | 1866.97 | 1867.99 | 114.49   | 3.20E-09                 | IDDLLGALSSLSDLHATK      |
| 35 | gi 125829449 | PREDICTED: similar to myosin heavy chain [Danio rerio]       | 43.1 | 1945    | 699.39  | 698.38  | 698.33  | 40.99    | 0.077                    | HATENK                  |
|    |              |                                                              |      |         | 1074.55 | 1073.54 | 1073.54 | 51.70    | 0.0085                   | ADIAESQVNK              |
|    |              |                                                              |      |         | 609.12  | 1216.22 | 1215.63 | 46.69    | 0.025                    | AGLLGQLEEMR             |
|    |              |                                                              |      |         | 624.15  | 1246.28 | 1244.65 | 73.73    | 4.80E-05                 | DIDDLEITLAK             |
|    |              |                                                              |      |         | 930.22  | 1858.43 | 1858.88 | 83.59    | 3.90E-06                 | LEQQVDDLEGSLEQEK        |
|    |              |                                                              |      |         | 994.76  | 1987.50 | 1986.97 | 80.63    | 7.40E-06                 | LEQQVDDLEGSLEQEKK       |
|    |              |                                                              |      |         | 1107.82 | 2213.62 | 2213.03 | 72.49    | 4.60E-05                 | TEIQAAL EEAEGTLEHEESK   |
| 36 | gi 162287365 | hemopexin [Danio rerio]                                      | 39.6 | 447     | 569.58  | 1137.14 | 1136.57 | 39.76    | 0.11                     | GQSIYDVDLK              |
|    |              |                                                              |      |         | 1211.60 | 1210.59 | 1210.61 | 42.67    | 0.054                    | GHHFLSITGDK             |
|    |              |                                                              |      |         | 1339.63 | 1338.62 | 1338.61 | 67.37    | 0.00018                  | FHSDTIESEFK             |
|    |              |                                                              |      |         | 900.94  | 1799.87 | 1800.00 | 65.94    | 0.00024                  | VGKPTHLEGYPKPLK         |
|    |              |                                                              |      |         | 721.15  | 2160.41 | 2159.07 | 59.48    | 0.00093                  | GKPGGEGHKHELHHGAQLDR    |
| 37 | gi 47086807  | acyl-Coenzyme A dehydrogenase, very long chain [Danio rerio] | 52.2 | 659     | 575.21  | 1148.40 | 1147.55 | 48.86    | 0.015                    | SFGGVSSGPPEK            |
|    |              |                                                              |      |         | 638.66  | 1275.30 | 1275.65 | 46.36    | 0.025                    | SFGGVSSGPPEKK           |
|    |              |                                                              |      |         | 837.23  | 1672.45 | 1671.94 | 109.89   | 9.80E-09                 | AIEQFGAVIEELLLK         |
| 38 | gi 189535893 | PREDICTED: similar to myosin heavy chain [Danio rerio]       | 40.4 | 1938    | 699.39  | 698.38  | 698.33  | 40.99    | 0.077                    | HATENK                  |
|    |              |                                                              |      |         | 614.04  | 1226.07 | 1223.61 | 44.28    | 0.039                    | TKYETDAIQR              |
|    |              |                                                              |      |         | 624.15  | 1246.28 | 1244.65 | 73.73    | 4.80E-05                 | DLDDLEITLAK             |

|    |              |                                                            |      |        |         |         |         |          |                   |                          |
|----|--------------|------------------------------------------------------------|------|--------|---------|---------|---------|----------|-------------------|--------------------------|
|    |              |                                                            |      | 930.22 | 1858.43 | 1858.88 | 83.59   | 3.90E-06 | LEQQVDDLEGSLEQEK  |                          |
|    |              |                                                            |      | 994.76 | 1987.50 | 1986.97 | 80.63   | 7.40E-06 | LEQQVDDLEGSLEQEKK |                          |
| 39 | gi 18858587  | elongation factor 1-alpha [Danio rerio]                    | 55.4 | 462    | 513.65  | 1025.28 | 1024.60 | 76.05    | 2.60E-05          | IGGIGTVPVGR              |
|    |              |                                                            |      |        | 530.56  | 1588.66 | 1587.87 | 53.86    | 0.0041            | THINIVVIGHVDSGK          |
|    |              |                                                            |      |        | 1250.51 | 2499.01 | 2497.15 | 74.77    | 2.30E-05          | SVEMHHESLTEATPGDNVGFN    |
|    |              |                                                            |      |        | 973.28  | 2916.80 | 2917.55 | 73.61    | 2.70E-05          | EGNASGTTLLDALDAILPPSRPT  |
| 40 | gi 148596963 | spectrin alpha 2 [Danio rerio]                             | 36.6 | 2480   | 624.43  | 1246.84 | 1246.55 | 52.54    | 0.0064            | GEIDAHEDSFK              |
|    |              |                                                            |      |        | 787.63  | 1573.25 | 1571.78 | 60.14    | 0.001             | HQALQAEISGHEPR           |
|    |              |                                                            |      |        | 851.20  | 1700.38 | 1699.88 | 108.80   | 1.20E-08          | KHQALQAEISGHEPR          |
|    |              |                                                            |      |        | 861.63  | 1721.25 | 1720.86 | 47.63    | 0.017             | LIQSHPEAVDDIQEK          |
|    |              |                                                            |      |        | 869.56  | 1737.10 | 1736.82 | 45.62    | 0.026             | TATDEAYKDPSNLQGK         |
|    |              |                                                            |      |        | 935.51  | 1869.01 | 1867.94 | 45.64    | 0.024             | HQAFEAEVQANAIAIK         |
|    |              |                                                            |      |        | 1010.83 | 2019.65 | 2018.99 | 84.45    | 3.10E-06          | LQIASDENYKDPSNLQGK       |
|    |              |                                                            |      |        | 1109.12 | 2216.23 | 2215.12 | 46.89    | 0.017             | RDELITNWEQIQLATER        |
|    |              |                                                            |      |        | 1245.85 | 2489.69 | 2489.22 | 70.75    | 6.00E-05          | EKEPIVGSPDYGKDEDSAEALL   |
| 41 | gi 41054601  | voltage-dependent anion channel 2 [Danio rerio]            | 60.4 | 283    | 1052.41 | 2102.81 | 2102.15 | 74.40    | 3.10E-05          | VNNTSLVGVGYTQSLRPGIK     |
|    |              |                                                            |      |        | 1087.84 | 2173.67 | 2174.05 | 116.05   | 2.00E-09          | WNTDNTLGTEINIEDQIAK      |
| 42 | gi 41054435  | hypothetical protein LOC324244 [Danio rerio]               | 42.7 | 248    | 585.81  | 1169.61 | 1169.67 | 62.93    | 0.00053           | LVILEGELER               |
|    |              |                                                            |      |        | 622.64  | 1243.26 | 1242.65 | 73.35    | 5.20E-05          | IQLVEEELDR               |
|    |              |                                                            |      |        | 638.22  | 1274.42 | 1271.65 | 70.93    | 8.80E-05          | EKAEGDVAALNR             |
|    |              |                                                            |      |        | 1298.67 | 1297.66 | 1297.76 | 56.35    | 0.0022            | KLVILEGELER              |
| 43 | gi 48762657  | enolase 1, (alpha) [Danio rerio]                           | 50.7 | 432    | 572.55  | 1143.09 | 1142.61 | 54.32    | 0.0042            | IGAEVYHNLK               |
|    |              |                                                            |      |        | 1002.86 | 3005.54 | 3006.57 | 91.47    | 4.40E-07          | HIADLAGNPVILPVPFNVINGC   |
| 44 | gi 47777298  | inner membrane protein, mitochondrial (mitofilin) [Danio r | 45.4 | 757    | 673.45  | 1344.88 | 1344.66 | 47.10    | 0.021             | STQALNEALNER             |
|    |              |                                                            |      |        | 978.50  | 1954.98 | 1955.09 | 105.92   | 2.20E-08          | KPETVKPLQISSLSEATK       |
|    |              |                                                            |      |        | 1066.66 | 2131.30 | 2130.11 | 113.88   | 3.50E-09          | AELDALAALTAGLEETLGSSAK   |
| 45 | gi 18858281  | apolipoprotein A-I [Danio rerio]                           | 48.5 | 262    | 585.48  | 1168.94 | 1166.55 | 54.76    | 0.0035            | AFESNIEETK               |
|    |              |                                                            |      |        | 823.18  | 1644.35 | 1643.73 | 85.28    | 2.90E-06          | ALDNLGTDYEYQYK           |
|    |              |                                                            |      |        | 912.77  | 1823.53 | 1821.93 | 50.61    | 0.0077            | EKLEPVFQEYSALNR          |
| 46 | gi 18858427  | creatine kinase, muscle a [Danio rerio]                    | 41.2 | 381    | 753.75  | 1505.48 | 1506.70 | 58.71    | 0.0013            | GGDDLDPNYVLSSR           |
|    |              |                                                            |      |        | 836.64  | 1671.27 | 1670.77 | 106.29   | 2.20E-08          | LNYSVDEEYPDLK            |
|    |              |                                                            |      |        | 997.90  | 1993.79 | 1993.93 | 89.39    | 9.70E-07          | GTGGVDTASVGGVFDISNADR    |
| 47 | gi 50344894  | tropomyosin 2 (beta) [Danio rerio]                         | 50.7 | 284    | 585.81  | 1169.61 | 1169.67 | 62.93    | 0.00053           | LVILEGELER               |
|    |              |                                                            |      |        | 622.64  | 1243.26 | 1242.65 | 73.35    | 5.20E-05          | IQLVEEELDR               |
|    |              |                                                            |      |        | 1298.67 | 1297.66 | 1297.76 | 56.35    | 0.0022            | KLVILEGELER              |
| 48 | gi 41054651  | isocitrate dehydrogenase 2 (NADP+), mitochondrial [Dan     | 47.4 | 449    | 1175.64 | 1174.63 | 1174.60 | 43.69    | 0.051             | ATDFVVNQPGK              |
|    |              |                                                            |      |        | 679.50  | 1356.98 | 1354.68 | 79.06    | 1.30E-05          | TIEAEEAHGTVTR            |
|    |              |                                                            |      |        | 716.09  | 1430.17 | 1428.73 | 77.41    | 1.80E-05          | FKDIFQDIFEK              |
| 49 | gi 41053939  | malate dehydrogenase 1a, NAD (soluble) [Danio rerio]       | 62   | 305    | 576.11  | 1150.21 | 1149.58 | 50.48    | 0.0096            | GDFISTVQQR               |
|    |              |                                                            |      |        | 662.69  | 1323.36 | 1320.67 | 44.96    | 0.031             | VVDGLSINDFSR             |
|    |              |                                                            |      |        | 855.66  | 1709.31 | 1706.82 | 87.43    | 1.70E-06          | EIAAFDAVNDESWLK          |
|    |              |                                                            |      |        | 1316.66 | 2631.30 | 2631.29 | 93.78    | 2.90E-07          | NVTIWGNHSSSTQYPDVHHAIVTI |
| 50 | gi 31044489  | heat shock 60 kD protein 1 [Danio rerio]                   | 62.6 | 575    | 985.23  | 1968.44 | 1967.90 | 120.13   | 8.30E-10          | VNEIAEQLESTNSDYEK        |
|    |              |                                                            |      |        | 813.97  | 2438.88 | 2439.35 | 87.01    | 1.50E-06          | TALLDAAGVASLLSTAEAVVTEII |
|    |              |                                                            |      |        | 942.93  | 2825.75 | 2825.53 | 52.54    | 0.0036            | TALLDAAGVASLLSTAEAVVTEII |
| 51 | gi 41282154  | aldolase a, fructose-bisphosphate [Danio rerio]            | 41.2 | 364    | 660.49  | 1318.96 | 1317.68 | 70.58    | 9.10E-05          | GILAADESTGSVAK           |
|    |              |                                                            |      |        | 776.69  | 1551.36 | 1550.70 | 66.10    | 0.00024           | FQSINAENTEENR            |
|    |              |                                                            |      |        | 1175.44 | 2348.86 | 2347.17 | 81.77    | 5.00E-06          | GVVPLAGTNGETTTQGLDGLYE   |
| 52 | gi 47086021  | aldolase a, fructose-bisphosphate, b [Danio rerio]         | 61.3 | 364    | 660.49  | 1318.96 | 1317.68 | 70.58    | 9.10E-05          | GILAADESTGSVAK           |
|    |              |                                                            |      |        | 776.69  | 1551.36 | 1550.70 | 66.10    | 0.00024           | FQSINAENTEENR            |
|    |              |                                                            |      |        | 1175.44 | 2348.86 | 2347.17 | 81.77    | 5.00E-06          | GVVPLAGTNGETTTQGLDGLYE   |
| 53 | gi 66773050  | myosin, heavy polypeptide 11, smooth muscle [Danio rer     | 44.8 | 1974   | 807.63  | 1613.25 | 1612.69 | 67.76    | 0.00016           | DLEEHLEEEEDAR            |

|    |              |                                                                        |      |         |         |         |         |          |                      |                           |
|----|--------------|------------------------------------------------------------------------|------|---------|---------|---------|---------|----------|----------------------|---------------------------|
|    |              |                                                                        |      | 865.31  | 1728.60 | 1725.94 | 53.58   | 0.0041   | QLLQANPILEAFGNAK     |                           |
|    |              |                                                                        |      | 956.63  | 1911.25 | 1910.93 | 69.96   | 8.70E-05 | HEVPPHIYSITDNAYR     |                           |
|    |              |                                                                        |      | 1000.06 | 1998.11 | 1997.92 | 89.03   | 1.10E-06 | ELEGHISDLQEDLESER    |                           |
|    |              |                                                                        |      | 1066.71 | 2131.40 | 2131.00 | 69.02   | 0.00011  | QVEAERDELADELASNASGK |                           |
| 54 | gi 47550793  | nicotinamide nucleotide transhydrogenase [Danio rerio]                 | 35.1 | 1079    | 1270.65 | 1269.64 | 1269.68 | 49.70    | 0.011                | SLGAEPLEVDIK              |
|    |              |                                                                        |      |         | 922.45  | 2764.32 | 2763.39 | 83.48    | 3.00E-06             | DGSVVVDLAAEAGGNIETTVP     |
| 55 | gi 50539808  | hypothetical protein LOC436647 [Danio rerio]                           | 57   | 525     | 709.08  | 1416.14 | 1415.73 | 72.48    | 5.90E-05             | VNSLIQSGVDEGAK            |
|    |              |                                                                        |      |         | 967.79  | 1933.56 | 1932.99 | 56.50    | 0.0019               | VNAGDQPGADVGLISPQAK       |
|    |              |                                                                        |      |         | 1006.23 | 2010.44 | 2009.00 | 95.36    | 2.40E-07             | SSQWLDIHNPATSEVIGR        |
| 56 | gi 47086069  | hypothetical protein LOC406529 [Danio rerio]                           | 85.2 | 283     | 675.75  | 1349.49 | 1347.70 | 62.29    | 0.00058              | LGLDTSFVPNTGK             |
|    |              |                                                                        |      |         | 930.64  | 1859.26 | 1858.82 | 76.85    | 1.90E-05             | SQSGVEFTTGGSSNTDTGK       |
|    |              |                                                                        |      |         | 1031.44 | 2060.86 | 2058.12 | 66.10    | 0.0002               | VNNASLVGVGYTQSLRPGVK      |
|    |              |                                                                        |      |         | 1096.63 | 2191.25 | 2189.09 | 81.74    | 5.50E-06             | WNTDNVLTTEVTLEDQLAK       |
| 57 | gi 56118753  | troponin C, slow [Danio rerio]                                         | 50.9 | 161     | 602.33  | 1202.64 | 1202.58 | 59.08    | 0.0014               | AAAEQLTDEQK               |
|    |              |                                                                        |      |         | 684.05  | 1366.08 | 1364.65 | 70.76    | 8.10E-05             | NADGYIDLDELK              |
|    |              |                                                                        |      |         | 723.66  | 1445.31 | 1444.73 | 60.51    | 0.00093              | GRPEEELAELEFR             |
| 58 | gi 47085773  | glutamic-oxaloacetic transaminase 1, soluble [Danio rerio]             | 61.5 | 410     | 1113.63 | 1112.62 | 1112.61 | 44.28    | 0.042                | IALGEDSPAIK               |
|    |              |                                                                        |      |         | 846.06  | 1690.11 | 1687.84 | 80.71    | 8.60E-06             | NIDYVAESIHEAVTK           |
|    |              |                                                                        |      |         | 1114.87 | 2227.73 | 2226.03 | 124.06   | 3.30E-10             | NLFAFFDSAYQGFASGDLEK      |
| 59 | gi 136429    | Trypsin precursor                                                      | 87.1 | 232     | 1105.98 | 2209.94 | 2210.10 | 125.54   | 2.30E-10             | LGEHNIDVLEGNEQFINAAK      |
| 60 | gi 41055728  | ATPase, Ca++ transporting, cardiac muscle, slow twitch :               | 51.6 | 996     | 732.86  | 1463.71 | 1463.67 | 54.55    | 0.0034               | IRDEMASTEQER              |
|    |              |                                                                        |      |         | 1525.87 | 1524.86 | 1524.80 | 73.09    | 4.60E-05             | DIVPGDIVEVAVGDK           |
|    |              |                                                                        |      |         | 788.66  | 1575.30 | 1573.86 | 86.17    | 2.50E-06             | VDQSILTGESVSVIK           |
| 61 | gi 71892474  | ATPase, Ca++ transporting, cardiac muscle, slow twitch :               | 47.7 | 1035    | 732.86  | 1463.71 | 1463.67 | 54.55    | 0.0034               | IRDEMASTEQER              |
|    |              |                                                                        |      |         | 1525.87 | 1524.86 | 1524.80 | 73.09    | 4.60E-05             | DIVPGDIVEVAVGDK           |
|    |              |                                                                        |      |         | 788.66  | 1575.30 | 1573.86 | 86.17    | 2.50E-06             | VDQSILTGESVSVIK           |
| 62 | gi 18858399  | cadherin 2, neuronal [Danio rerio]                                     | 27.3 | 783     | 843.88  | 1685.75 | 1683.81 | 61.16    | 0.00075              | VIDVNESPNFDPNPK           |
|    |              |                                                                        |      |         | 1148.47 | 3442.39 | 3440.82 | 98.83    | 6.30E-08             | YSVTGPGADQNPTGLFIIDPISGI  |
| 63 | gi 54606886  | hexokinase 1 [Danio rerio]                                             | 50.3 | 918     | 749.15  | 1496.28 | 1494.68 | 69.18    | 0.00011              | YDDAVDDLNLNAGK            |
|    |              |                                                                        |      |         | 863.58  | 1725.15 | 1723.83 | 106.79   | 2.00E-08             | TKYDDAVDDLNLNAGK          |
| 64 | gi 56090150  | NADH dehydrogenase (ubiquinone) Fe-S protein 1 [Danio rerio]           | 57.3 | 731     | 805.44  | 1608.86 | 1607.78 | 102.93   | 4.80E-08             | FASEVAGVEDLGTTR           |
|    |              |                                                                        |      |         | 1570.97 | 3139.92 | 3139.56 | 100.34   | 5.30E-08             | DSFIVYQGHGVDGAPIADVILP    |
| 65 | gi 40254659  | bactin2 [Danio rerio]                                                  | 52   | 375     | 488.23  | 974.45  | 975.44  | 46.37    | 0.03                 | AGFAGDDAPR                |
|    |              |                                                                        |      |         | 977.46  | 1952.91 | 1953.06 | 79.89    | 8.60E-06             | VAPEEHPVLLTEAPLNPK        |
| 66 | gi 147906978 | hypothetical protein LOC492719 [Danio rerio]                           | 60.2 | 603     | 1059.42 | 2116.82 | 2115.97 | 81.90    | 5.40E-06             | GKEYDDLIDEFMQAVTDK        |
|    |              |                                                                        |      |         | 1004.66 | 3010.94 | 3013.43 | 129.45   | 6.80E-11             | HISDDIFLTTAEAISEMVT EEHLA |
| 67 | gi 38488731  | natriuretic peptide precursor A [Danio rerio]                          | 74.5 | 106     | 1046.85 | 2091.68 | 2091.86 | 77.93    | 1.40E-05             | EEAAAPGEDSNPSDGFDTQR      |
|    |              |                                                                        |      |         | 1182.86 | 2363.71 | 2362.99 | 77.03    | 1.50E-05             | DREEAAAPGEDSNPSDGFDTQI    |
| 68 | gi 27545193  | creatine kinase, brain [Danio rerio]                                   | 40.4 | 381     | 753.75  | 1505.48 | 1506.70 | 58.71    | 0.0013               | GGDDLDPNYVLSSR            |
|    |              |                                                                        |      |         | 989.80  | 1977.58 | 1977.94 | 102.38   | 5.00E-08             | GTGGVDTA AVGGVFDISNADR    |
| 69 | gi 68383957  | PREDICTED: apolipoprotein C-II isoform 1 [Danio rerio]                 | 41   | 100     | 1013.75 | 2025.48 | 2024.92 | 111.62   | 5.70E-09             | SYDQSVDTASGYVETIK         |
| 70 | gi 116004537 | hypothetical protein LOC564694 [Danio rerio]                           | 43.6 | 381     | 753.75  | 1505.48 | 1506.70 | 58.71    | 0.0013               | GGDDLDPNYVLSSR            |
|    |              |                                                                        |      |         | 989.80  | 1977.58 | 1977.94 | 102.38   | 5.00E-08             | GTGGVDTA AVGGVFDISNADR    |
| 71 | gi 41053873  | succinate dehydrogenase complex, subunit A, flavoprotein [Danio rerio] | 61   | 661     | 1474.72 | 1473.71 | 1473.75 | 73.86    | 4.20E-05             | KHTLSYVDPETGK             |
|    |              |                                                                        |      |         | 1055.70 | 2109.39 | 2109.13 | 43.11    | 0.041                | DHVHLQLHHLPPQQLAAR        |
|    |              |                                                                        |      |         | 1291.54 | 2581.07 | 2582.14 | 56.25    | 0.0017               | DGQDHVVPGLYACGEAGCASV     |
|    |              |                                                                        |      |         | 888.17  | 2661.47 | 2662.42 | 60.65    | 0.00059              | GVGPKDQHVHLQLHHLPPQQLAAR  |
| 72 | gi 40538764  | ceruloplasmin [Danio rerio]                                            | 32.1 | 1087    | 805.83  | 1609.65 | 1609.72 | 87.83    | 1.60E-06             | SVNKEDADFQESNK            |
|    |              |                                                                        |      |         | 827.90  | 1653.79 | 1654.78 | 103.86   | 3.80E-08             | LVDDIVSDTFFDNR            |
| 73 | gi 40786398  | pyruvate kinase, muscle, a [Danio rerio]                               | 52.3 | 532     | 819.19  | 1636.36 | 1635.88 | 66.50    | 0.00021              | GVNLPGA AVDLPVAVSEK       |
|    |              |                                                                        |      |         | 884.20  | 1766.38 | 1763.98 | 94.81    | 3.00E-07             | KGVNLPGA AVDLPVAVSEK      |
| 74 | gi 32308153  | annexin A2a [Danio rerio]                                              | 44.8 | 337     | 606.76  | 1211.50 | 1211.57 | 72.36    | 6.00E-05             | STAQYDASEIK               |

|    |              |                                                                               |      |        |         |         |         |          |               |                          |
|----|--------------|-------------------------------------------------------------------------------|------|--------|---------|---------|---------|----------|---------------|--------------------------|
|    |              |                                                                               |      | 634.06 | 1266.11 | 1263.66 | 55.02   | 0.0032   | SLHQITAEHTK   |                          |
|    |              |                                                                               |      | 722.94 | 1443.86 | 1443.78 | 88.15   | 1.60E-06 | GVDEQTIIDILTK |                          |
| 75 | gj 47777306  | Voltage-dependent anion channel 1 [Danio rerio]                               | 56.9 | 283    | 1319.68 | 1318.67 | 1317.64 | 51.79    | 0.007         | WAEHGLTFTEK              |
|    |              |                                                                               |      |        | 1045.46 | 2088.90 | 2088.16 | 88.25    | 1.30E-06      | VNSSLVGLGYTQTLKPGIK      |
|    |              |                                                                               |      |        | 1097.43 | 2192.85 | 2191.06 | 103.87   | 3.30E-08      | WNTDNTLGTEITLEDQLTK      |
| 76 | gj 18858959  | lactate dehydrogenase A4 [Danio rerio]                                        | 54.1 | 333    | 480.22  | 958.43  | 956.61  | 50.92    | 0.01          | FIIPNIIK                 |
|    |              |                                                                               |      |        | 595.62  | 1189.23 | 1188.61 | 71.56    | 8.00E-05      | VIGSGTNLDSAR             |
|    |              |                                                                               |      |        | 627.64  | 1253.27 | 1252.64 | 69.43    | 0.00011       | MVVDSAYEVIK              |
|    |              |                                                                               |      |        | 756.27  | 1510.52 | 1509.77 | 63.97    | 0.00038       | IVADKDYSVTANSK           |
| 77 | gj 41152400  | peptidylprolyl isomerase A, like [Danio rerio]                                | 49.4 | 164    | 686.47  | 1370.93 | 1370.73 | 98.39    | 1.50E-07      | VVDGLDVVDAIEK            |
| 78 | gj 125805081 | PREDICTED: similar to LOC495046 protein [Danio rerio]                         | 42.7 | 1050   | 1525.87 | 1524.86 | 1524.80 | 73.09    | 4.60E-05      | DIVPGDIVEVAVGDK          |
|    |              |                                                                               |      |        | 788.66  | 1575.30 | 1573.86 | 86.17    | 2.50E-06      | VDQSILTGESVSVLK          |
|    |              |                                                                               |      |        | 920.62  | 1839.22 | 1837.88 | 39.20    | 0.11          | SLPSVETLGCTSVICSDK       |
| 79 | gj 68433600  | PREDICTED: similar to LOC495046 protein isoform 1 [Danio rerio]               | 41.5 | 1056   | 1525.87 | 1524.86 | 1524.80 | 73.09    | 4.60E-05      | DIVPGDIVEVAVGDK          |
|    |              |                                                                               |      |        | 788.66  | 1575.30 | 1573.86 | 86.17    | 2.50E-06      | VDQSILTGESVSVLK          |
|    |              |                                                                               |      |        | 920.62  | 1839.22 | 1837.88 | 39.20    | 0.11          | SLPSVETLGCTSVICSDK       |
| 80 | gj 47087061  | glutamic-oxaloacetic transaminase 2a, mitochondrial (aspartate) [Danio rerio] | 61.4 | 428    | 555.66  | 1109.31 | 1107.59 | 56.05    | 0.0025        | KMNLGVGAYR               |
|    |              |                                                                               |      |        | 644.57  | 1287.13 | 1284.69 | 49.72    | 0.012         | GALDDISKIPEK             |
|    |              |                                                                               |      |        | 947.18  | 1892.34 | 1893.02 | 103.02   | 4.30E-08      | KLDKEYLPIGGLADFSK        |
|    |              |                                                                               |      |        | 665.76  | 1994.24 | 1994.03 | 43.33    | 0.04          | YFIEQGHNILLSQSFAK        |
|    |              |                                                                               |      |        | 784.30  | 2349.87 | 2350.26 | 70.31    | 7.10E-05      | ISVAGVTSANVEYLAAHAIHAVTK |
| 81 | gj 47085765  | hypothetical protein LOC406325 [Danio rerio]                                  | 52.4 | 397    | 595.17  | 1188.32 | 1187.68 | 66.98    | 0.00024       | ITAHLVHELK               |
|    |              |                                                                               |      |        | 932.38  | 1862.75 | 1861.98 | 91.68    | 6.10E-07      | TNVNGGAIAGHPLGASGTR      |
| 82 | gj 47085905  | tyrosine 3-monooxygenase/tryptophan 5-monooxygenase [Danio rerio]             | 44.6 | 242    | 1155.55 | 1154.54 | 1154.55 | 53.71    | 0.0044        | YLSEVASGDSK              |
|    |              |                                                                               |      |        | 648.46  | 1294.90 | 1293.66 | 56.75    | 0.0021        | YLIANASQAESK             |
|    |              |                                                                               |      |        | 1073.03 | 2144.04 | 2143.98 | 120.68   | 7.10E-10      | TAFDEAIAELDTLNEDSYK      |
| 83 | gj 189522028 | PREDICTED: similar to myomesin [Danio rerio]                                  | 59.6 | 923    | 755.82  | 1509.62 | 1507.73 | 68.34    | 0.00014       | FKGEFDESLPSR             |
|    |              |                                                                               |      |        | 1258.77 | 3773.27 | 3772.95 | 53.64    | 0.0019        | GASAPWTGQIIVTEEEPVEGVV   |
|    |              |                                                                               |      |        | 1301.49 | 3901.45 | 3901.05 | 67.56    | 7.10E-05      | KGASAPWTGQIIVTEEEPVEGVV  |
| 84 | gj 8395615   | cytochrome c oxidase subunit II [Danio rerio]                                 | 26.5 | 230    | 1068.52 | 2135.02 | 2133.18 | 60.00    | 0.00083       | ILVSAEDVLHSAVPSLGIK      |
| 85 | gj 189520787 | PREDICTED: tyrosine 3-monooxygenase/tryptophan 5-monooxygenase [Danio rerio]  | 45.9 | 244    | 1155.55 | 1154.54 | 1154.55 | 53.71    | 0.0044        | YLSEVASGDSK              |
|    |              |                                                                               |      |        | 1073.03 | 2144.04 | 2143.98 | 120.68   | 7.10E-10      | TAFDEAIAELDTLNEDSYK      |
| 86 | gj 113195582 | hypothetical protein LOC556489 [Danio rerio]                                  | 75.2 | 226    | 723.80  | 1445.58 | 1445.78 | 65.41    | 0.0003        | VIFEAETEKPGVK            |
|    |              |                                                                               |      |        | 881.39  | 2641.15 | 2641.29 | 64.07    | 0.00027       | SPDPAAVEHKPEESKPEESKPE   |
|    |              |                                                                               |      |        | 1221.79 | 3662.33 | 3660.68 | 76.94    | 9.30E-06      | EPPPAPTENSAPESTGPPSDGV   |
| 87 | gj 189517523 | PREDICTED: hypothetical protein [Danio rerio]                                 | 83.7 | 147    | 714.14  | 1426.27 | 1424.76 | 97.25    | 1.80E-07      | INVDEIGPQTLAR            |
| 88 | gj 41152342  | creatine kinase, mitochondrial 2 (sarcomeric) [Danio rerio]                   | 50.1 | 413    | 1040.92 | 2079.82 | 2079.97 | 104.18   | 3.20E-08      | GTGGVDTAAVGDTFDISNLDR    |
|    |              |                                                                               |      |        | 1119.27 | 2236.53 | 2236.07 | 41.96    | 0.051         | RGTGGVDTAAVGDTFDISNLDR   |
| 89 | gj 41054193  | hypothetical protein LOC327506 [Danio rerio]                                  | 62.9 | 178    | 1040.92 | 2079.82 | 2079.97 | 104.18   | 3.20E-08      | GTGGVDTAAVGDTFDISNLDR    |
|    |              |                                                                               |      |        | 1119.27 | 2236.53 | 2236.07 | 41.96    | 0.051         | RGTGGVDTAAVGDTFDISNLDR   |
| 90 | gj 47085887  | MARCKS-like 1 [Danio rerio]                                                   | 55.9 | 213    | 939.32  | 1876.63 | 1874.84 | 89.22    | 1.10E-06      | TEEGDGIEAAPATEAEASK      |
|    |              |                                                                               |      |        | 980.98  | 1959.94 | 1959.89 | 70.18    | 8.20E-05      | AEEPAQQTETAPTEETTK       |
| 91 | gj 41393141  | tropomyosin 3 [Danio rerio]                                                   | 63.3 | 248    | 1182.60 | 1181.59 | 1181.55 | 44.09    | 0.039         | EDKYEEEIK                |
|    |              |                                                                               |      |        | 622.64  | 1243.26 | 1242.65 | 73.35    | 5.20E-05      | IQLVEEELDR               |
|    |              |                                                                               |      |        | 708.62  | 1415.23 | 1414.67 | 59.89    | 0.0011        | VLQQQADEAEER             |
| 92 | gj 189535578 | PREDICTED: fetuin B [Danio rerio]                                             | 42.8 | 498    | 456.37  | 910.72  | 910.50  | 56.67    | 0.002         | ASASLHLGR                |
|    |              |                                                                               |      |        | 1117.00 | 2231.98 | 2233.01 | 86.29    | 1.90E-06      | KDETHEHDHEIVLDHDK        |
|    |              |                                                                               |      |        | 797.00  | 2387.96 | 2389.01 | 42.38    | 0.043         | AHEHGQDEWEHQHHQYGHK      |
| 93 | gj 50344790  | hypothetical protein LOC415158 [Danio rerio]                                  | 79.8 | 104    | 745.23  | 1488.45 | 1487.65 | 58.76    | 0.0014        | TGQAEGFSYTDANK           |
|    |              |                                                                               |      |        | 809.10  | 1616.18 | 1615.75 | 91.49    | 7.00E-07      | KTGQAEGFSYTDANK          |
|    |              |                                                                               |      |        | 1061.98 | 2121.94 | 2121.05 | 45.63    | 0.022         | GIVWGEDTLMEYLENPKK       |
| 94 | gj 157787181 | creatine kinase CKM3 [Danio rerio]                                            | 43.9 | 380    | 753.75  | 1505.48 | 1506.70 | 58.71    | 0.0013        | GGDDLDPNYVLSSR           |



|     |              |                                                             |      |      |         |         |         |        |          |                           |
|-----|--------------|-------------------------------------------------------------|------|------|---------|---------|---------|--------|----------|---------------------------|
| 95  | gi 66773138  | cytochrome c oxidase subunit Vaa [Danio rerio]              | 79.4 | 141  | 997.90  | 1993.79 | 1993.93 | 89.39  | 9.70E-07 | GTGGVDTASVGGVFDISNADR     |
|     |              |                                                             |      |      | 488.03  | 974.05  | 972.52  | 54.91  | 0.0041   | LDDLASAIR                 |
|     |              |                                                             |      |      | 1659.06 | 3316.11 | 3313.73 | 60.17  | 0.00051  | EIYPYVIQELRPTLDELGIATPEE  |
|     |              |                                                             |      |      | 1694.32 | 3386.62 | 3384.77 | 59.50  | 0.00056  | EIYPYVIQELRPTLDELGIATPEE  |
| 96  | gi 119943123 | apolipoprotein A-IV [Danio rerio]                           | 38   | 255  | 903.11  | 1804.21 | 1802.94 | 108.11 | 1.50E-08 | AQIVQQSLTPYAEDLK          |
| 97  | gi 68448530  | vitellogenin 5 [Danio rerio]                                | 45.1 | 1360 | 588.13  | 1174.25 | 1172.62 | 53.92  | 0.0048   | LEFEVQVGPR                |
|     |              |                                                             |      |      | 1215.56 | 1214.55 | 1214.59 | 42.98  | 0.056    | THYVINEDPK                |
|     |              |                                                             |      |      | 706.51  | 1411.00 | 1410.81 | 47.98  | 0.015    | IKDAPAQTVEVLK             |
|     |              |                                                             |      |      | 759.43  | 1516.84 | 1514.74 | 75.85  | 2.70E-05 | VFGQEVAYVNFDFK            |
| 98  | gi 189530625 | PREDICTED: similar to spectrin repeat containing, nucle:    | 38.9 | 8621 | 551.01  | 1100.01 | 1097.66 | 70.18  | 0.00012  | QLADAIKLR                 |
| 99  | gi 57526509  | propionyl-Coenzyme A carboxylase, alpha polypeptide [C      | 64.2 | 709  | 826.20  | 1650.38 | 1649.84 | 74.99  | 3.10E-05 | TVAVHSDVDSSAVHVK          |
| 100 | gi 115495857 | hypothetical protein LOC767650 [Danio rerio]                | 75.7 | 103  | 567.82  | 1133.63 | 1133.54 | 49.53  | 0.012    | DAVITYTEHAK               |
|     |              |                                                             |      |      | 591.66  | 1181.30 | 1179.61 | 66.87  | 0.00021  | ISGLIYEETR                |
|     |              |                                                             |      |      | 657.35  | 1312.68 | 1309.70 | 53.96  | 0.004    | TVTAMDVVYALK              |
|     |              |                                                             |      |      | 664.19  | 1326.36 | 1324.75 | 49.37  | 0.011    | DNIQGITKPAIR              |
| 101 | gi 68362804  | PREDICTED: similar to Histone H4 replacement CG3379         | 75.7 | 103  | 567.82  | 1133.63 | 1133.54 | 49.53  | 0.012    | DAVITYTEHAK               |
|     |              |                                                             |      |      | 591.66  | 1181.30 | 1179.61 | 66.87  | 0.00021  | ISGLIYEETR                |
|     |              |                                                             |      |      | 657.35  | 1312.68 | 1309.70 | 53.96  | 0.004    | TVTAMDVVYALK              |
|     |              |                                                             |      |      | 664.19  | 1326.36 | 1324.75 | 49.37  | 0.011    | DNIQGITKPAIR              |
| 102 | gi 160420306 | hypothetical protein LOC678536 [Danio rerio]                | 49.2 | 1358 | 588.13  | 1174.25 | 1172.62 | 53.92  | 0.0048   | LEFEVQVGPR                |
|     |              |                                                             |      |      | 1215.56 | 1214.55 | 1214.59 | 42.98  | 0.056    | THYVINEDPK                |
|     |              |                                                             |      |      | 759.43  | 1516.84 | 1514.74 | 75.85  | 2.70E-05 | VFGQEVAYVNFDFK            |
| 103 | gi 156713467 | vitellogenin 7 [Danio rerio]                                | 44.8 | 1358 | 588.13  | 1174.25 | 1172.62 | 53.92  | 0.0048   | LEFEVQVGPR                |
|     |              |                                                             |      |      | 1215.56 | 1214.55 | 1214.59 | 42.98  | 0.056    | THYVINEDPK                |
|     |              |                                                             |      |      | 759.43  | 1516.84 | 1514.74 | 75.85  | 2.70E-05 | VFGQEVAYVNFDFK            |
| 104 | gi 166795887 | vitellogenin 1 [Danio rerio]                                | 42.6 | 1362 | 588.13  | 1174.25 | 1172.62 | 53.92  | 0.0048   | LEFEVQVGPR                |
|     |              |                                                             |      |      | 1215.56 | 1214.55 | 1214.59 | 42.98  | 0.056    | THYVINEDPK                |
|     |              |                                                             |      |      | 759.43  | 1516.84 | 1514.74 | 75.85  | 2.70E-05 | VFGQEVAYVNFDFK            |
| 105 | gi 47086009  | ribosomal protein L19 [Danio rerio]                         | 49   | 196  | 972.16  | 1942.31 | 1941.92 | 89.34  | 9.90E-07 | VWLDPNETNEIANANSR         |
| 106 | gi 45387763  | hypothetical protein LOC402975 [Danio rerio]                | 73.9 | 284  | 1182.60 | 1181.59 | 1181.55 | 44.09  | 0.039    | EDKYEEEIK                 |
|     |              |                                                             |      |      | 622.64  | 1243.26 | 1242.65 | 73.35  | 5.20E-05 | IQLVEEELDR                |
| 107 | gi 18859505  | alpha-tropomyosin [Danio rerio]                             | 56.7 | 284  | 1182.60 | 1181.59 | 1181.55 | 44.09  | 0.039    | EDKYEEEIK                 |
|     |              |                                                             |      |      | 622.64  | 1243.26 | 1242.65 | 73.35  | 5.20E-05 | IQLVEEELDR                |
| 108 | gi 49274617  | tropomyosin 1 alpha [Danio rerio]                           | 36.3 | 284  | 1182.60 | 1181.59 | 1181.55 | 44.09  | 0.039    | EDKYEEEIK                 |
|     |              |                                                             |      |      | 622.64  | 1243.26 | 1242.65 | 73.35  | 5.20E-05 | IQLVEEELDR                |
| 109 | gi 70778734  | ATPase, Na+/K+ transporting, alpha 3b polypeptide [Dan      | 50.9 | 1023 | 717.77  | 1433.53 | 1433.75 | 73.01  | 5.00E-05 | FQTDIVQGLTNAK             |
|     |              |                                                             |      |      | 907.46  | 1812.91 | 1810.94 | 70.66  | 7.70E-05 | QGAIVAVTGDGVNDSPALK       |
|     |              |                                                             |      |      | 924.90  | 1847.78 | 1846.81 | 66.68  | 0.00019  | YQLSIHETEDNNDNR           |
| 110 | gi 54400460  | fibulin 5 [Danio rerio]                                     | 46.3 | 477  | 1111.45 | 2220.88 | 2220.00 | 92.28  | 4.80E-07 | NSPLPYPEASYPEEPYDPR       |
| 111 | gi 71834286  | hypothetical protein LOC321166 [Danio rerio]                | 35.6 | 3730 | 816.24  | 1630.47 | 1628.74 | 82.22  | 6.10E-06 | FTSNNEANVGSFNTK           |
|     |              |                                                             |      |      | 967.39  | 1932.77 | 1931.96 | 72.74  | 4.60E-05 | TLHLDDSIDSVHPIQDK         |
|     |              |                                                             |      |      | 1036.96 | 3107.84 | 3105.49 | 44.71  | 0.02     | YDAEEIEAEVSSDVTTEIHNIITTI |
| 112 | gi 47086523  | ictacalcin [Danio rerio]                                    | 82.1 | 95   | 696.63  | 1391.25 | 1390.73 | 79.96  | 1.10E-05 | ELLSAELGDIFGK             |
| 113 | gi 41055614  | hypothetical protein LOC393478 [Danio rerio]                | 15.1 | 86   | 733.60  | 1465.19 | 1464.65 | 43.84  | 0.039    | WDSQIEDGSFPGK             |
|     |              |                                                             |      |      | 734.13  | 1466.25 | 1464.65 | 86.49  | 2.10E-06 | WDSQIEDGSFPGK             |
| 114 | gi 23308625  | fatty acid binding protein 3, muscle and heart [Danio reric | 46.6 | 133  | 749.60  | 1497.18 | 1496.63 | 63.80  | 0.00039  | LGEEFDETTADDR             |
|     |              |                                                             |      |      | 1081.31 | 2160.60 | 2160.13 | 61.63  | 0.00057  | EVSDNNLTLTLGLDIVSTR       |
| 115 | gi 55741944  | wu:cegs655 [Danio rerio]                                    | 47.9 | 994  | 788.66  | 1575.30 | 1573.86 | 86.17  | 2.50E-06 | VDQSILTGESVSVIK           |
|     |              |                                                             |      |      | 920.62  | 1839.22 | 1837.88 | 39.20  | 0.11     | SLPSVETLGCTSVICSDK        |
| 116 | gi 117606266 | ATPase, Ca++ transporting, cardiac muscle, fast twitch 1    | 43.2 | 991  | 788.66  | 1575.30 | 1573.86 | 86.17  | 2.50E-06 | VDQSILTGESVSVIK           |
|     |              |                                                             |      |      | 920.62  | 1839.22 | 1837.88 | 39.20  | 0.11     | SLPSVETLGCTSVICSDK        |
| 117 | gi 189519111 | PREDICTED: similar to ATPase, Ca++ transporting, fast       | 49.7 | 1005 | 788.66  | 1575.30 | 1573.86 | 86.17  | 2.50E-06 | VDQSILTGESVSVIK           |

|     |              |                                                                                         |      |      |         |         |         |        |          |                         |
|-----|--------------|-----------------------------------------------------------------------------------------|------|------|---------|---------|---------|--------|----------|-------------------------|
| 118 | gi 21426837  | glucose phosphate isomerase b [Danio rerio]                                             | 43.4 | 553  | 716.54  | 1431.06 | 1430.69 | 66.29  | 0.00024  | ELEAGGLSGDNLEK          |
|     |              |                                                                                         |      |      | 780.76  | 1559.51 | 1558.78 | 80.43  | 9.00E-06 | KELEAGGLSGDNLEK         |
|     |              |                                                                                         |      |      | 821.74  | 1641.46 | 1640.79 | 63.28  | 0.00044  | TFTTQETITNAESAK         |
| 119 | gi 47271422  | triosephosphate isomerase 1b [Danio rerio]                                              | 78.6 | 248  | 1458.72 | 1457.71 | 1457.72 | 88.87  | 1.30E-06 | HVFGESDELIGQK           |
|     |              |                                                                                         |      |      | 808.17  | 1614.32 | 1613.82 | 47.68  | 0.016    | RHVFGESDELIGQK          |
| 120 | gi 24119234  | triosephosphate isomerase 1a [Danio rerio]                                              | 51.2 | 248  | 1458.72 | 1457.71 | 1457.72 | 88.87  | 1.30E-06 | HVFGESDELIGQK           |
|     |              |                                                                                         |      |      | 808.17  | 1614.32 | 1613.82 | 47.68  | 0.016    | RHVFGESDELIGQK          |
| 121 | gi 189540214 | PREDICTED: similar to myosin heavy chain, partial [Danio rerio]                         | 58.6 | 809  | 733.28  | 1464.55 | 1464.77 | 90.20  | 9.20E-07 | LASADIETYLLEK           |
|     |              |                                                                                         |      |      | 745.69  | 1489.36 | 1488.74 | 65.97  | 0.00026  | ENQSVLITGESGAGK         |
|     |              |                                                                                         |      |      | 790.32  | 2367.93 | 2366.12 | 47.04  | 0.016    | LQQFFNHMHMFVLEQEEYK     |
| 122 | gi 189540222 | PREDICTED: similar to myosin, heavy polypeptide 2, fast                                 | 51.6 | 950  | 733.28  | 1464.55 | 1464.77 | 90.20  | 9.20E-07 | LASADIETYLLEK           |
|     |              |                                                                                         |      |      | 745.69  | 1489.36 | 1488.74 | 65.97  | 0.00026  | ENQSVLITGESGAGK         |
|     |              |                                                                                         |      |      | 790.32  | 2367.93 | 2366.12 | 47.04  | 0.016    | LQQFFNHMHMFVLEQEEYK     |
| 123 | gi 50345022  | small muscle protein, X-linked [Danio rerio]                                            | 59   | 83   | 1038.53 | 2075.05 | 2072.97 | 88.25  | 1.30E-06 | REDTVETEEVSPVTPEEK      |
| 124 | gi 189522849 | PREDICTED: similar to oxoglutarate (alpha-ketoglutarate) lyase                          | 30   | 961  | 834.79  | 1667.56 | 1665.82 | 81.39  | 6.90E-06 | VITDDGPPAQNPSSEVK       |
|     |              |                                                                                         |      |      | 1201.09 | 2400.17 | 2399.32 | 50.61  | 0.0065   | NITLSLVANPSHLEAVNPVVQGH |
| 125 | gi 41055855  | aldehyde dehydrogenase 4 family, member A1 [Danio rerio]                                | 34.5 | 556  | 1044.08 | 2086.14 | 2086.97 | 105.00 | 2.60E-08 | VGDPVEDFSTFFSAVIDDK     |
| 126 | gi 41282194  | glutamate dehydrogenase 1 [Danio rerio]                                                 | 47.8 | 542  | 786.25  | 1570.48 | 1568.77 | 84.15  | 3.90E-06 | IIAEGANGPTTPDADK        |
| 127 | gi 41151982  | major vault protein [Danio rerio]                                                       | 48.8 | 863  | 580.37  | 1158.73 | 1156.71 | 41.00  | 0.093    | KEVTVLEVIK              |
|     |              |                                                                                         |      |      | 1069.52 | 2137.03 | 2137.12 | 86.26  | 2.00E-06 | IPPHHYIHVLDQNTNIAR      |
| 128 | gi 54400442  | hypothetical protein LOC449795 [Danio rerio]                                            | 65.3 | 202  | 999.01  | 2993.99 | 2996.41 | 51.77  | 0.004    | TLAAGSHAEHDGQPYCHKPCY/  |
|     |              |                                                                                         |      |      | 1008.93 | 3023.75 | 3023.42 | 65.34  | 0.00017  | TLNPGGHAHDGKPYCHKPCY/   |
| 129 | gi 47085923  | pyruvate dehydrogenase (lipoamide) beta [Danio rerio]                                   | 30.6 | 359  | 635.80  | 1269.58 | 1268.70 | 46.61  | 0.022    | ILEDNSIPQIK             |
|     |              |                                                                                         |      |      | 879.64  | 1757.27 | 1758.94 | 85.04  | 3.00E-06 | SIRPLDADTIETSITK        |
| 130 | gi 54400698  | hydroxysteroid (17-beta) dehydrogenase 10 [Danio rerio]                                 | 58.5 | 260  | 852.69  | 1703.36 | 1702.86 | 87.04  | 1.90E-06 | HGASAVILDLPSSDGHK       |
| 131 | gi 52219194  | fatty acid binding protein 11 [Danio rerio]                                             | 53   | 134  | 769.55  | 1537.08 | 1535.67 | 70.79  | 7.80E-05 | LNEPFEETTADDR           |
|     |              |                                                                                         |      |      | 832.91  | 1663.80 | 1663.77 | 81.11  | 7.50E-06 | LNEPFEETTADDRK          |
| 132 | gi 45387533  | hypothetical protein LOC323320 [Danio rerio]                                            | 43.3 | 890  | 717.70  | 1433.39 | 1432.71 | 40.30  | 0.094    | LSNRPAFMPSEGK           |
|     |              |                                                                                         |      |      | 761.94  | 1521.86 | 1520.71 | 64.59  | 0.00033  | AGTQIENIEEDFR           |
|     |              |                                                                                         |      |      | 826.70  | 1651.38 | 1648.81 | 54.98  | 0.0031   | KAGTQIENIEEDFR          |
|     |              |                                                                                         |      |      | 877.58  | 1753.15 | 1752.82 | 74.90  | 3.00E-05 | KHEAFESDLAAHQDR         |
| 133 | gi 56118264  | actinin alpha 3 [Danio rerio]                                                           | 30.4 | 896  | 717.70  | 1433.39 | 1432.71 | 40.30  | 0.094    | LSNRPAFMPSEGK           |
|     |              |                                                                                         |      |      | 761.94  | 1521.86 | 1520.71 | 64.59  | 0.00033  | AGTQIENIEEDFR           |
|     |              |                                                                                         |      |      | 826.70  | 1651.38 | 1648.81 | 54.98  | 0.0031   | KAGTQIENIEEDFR          |
|     |              |                                                                                         |      |      | 877.58  | 1753.15 | 1752.82 | 74.90  | 3.00E-05 | KHEAFESDLAAHQDR         |
| 134 | gi 189521338 | PREDICTED: hypothetical protein [Danio rerio]                                           | 51.2 | 523  | 790.73  | 1579.45 | 1577.76 | 96.77  | 2.00E-07 | YDVQVQIENVEDK           |
|     |              |                                                                                         |      |      | 945.77  | 1889.52 | 1888.04 | 53.82  | 0.0037   | ASVNIQIVDVPQPPQNLK      |
| 135 | gi 41054603  | actinin alpha 4 [Danio rerio]                                                           | 27.3 | 901  | 761.94  | 1521.86 | 1520.71 | 64.59  | 0.00033  | AGTQIENIEEDFR           |
|     |              |                                                                                         |      |      | 826.70  | 1651.38 | 1648.81 | 54.98  | 0.0031   | KAGTQIENIEEDFR          |
|     |              |                                                                                         |      |      | 877.58  | 1753.15 | 1752.82 | 74.90  | 3.00E-05 | KHEAFESDLAAHQDR         |
| 136 | gi 148922875 | hypothetical protein LOC567716 [Danio rerio]                                            | 39.6 | 331  | 969.85  | 1937.69 | 1936.93 | 109.86 | 8.90E-09 | HLTTLVDDIWIYYAGDR       |
| 137 | gi 51011113  | hydroxyacyl-Coenzyme A dehydrogenase [Danio rerio]                                      | 62.8 | 309  | 797.76  | 1593.50 | 1593.77 | 45.57  | 0.027    | FAEKPEDGEAFVQK          |
|     |              |                                                                                         |      |      | 819.87  | 1637.72 | 1636.85 | 62.69  | 0.0005   | DPDNPLFAPSLLNK          |
|     |              |                                                                                         |      |      | 942.81  | 1883.61 | 1882.93 | 68.33  | 0.00013  | TPATSQQTFDALLEFSK       |
| 138 | gi 18858295  | ATPase, Na <sup>+</sup> /K <sup>+</sup> transporting, alpha 1 polypeptide [Danio rerio] | 47.8 | 1028 | 877.21  | 1752.40 | 1751.85 | 64.06  | 0.00037  | DAFQNAVYLELGLGER        |
|     |              |                                                                                         |      |      | 907.46  | 1812.91 | 1810.94 | 70.66  | 7.70E-05 | QGAIVAVTGDGVNDSPALK     |
|     |              |                                                                                         |      |      | 987.65  | 1973.29 | 1972.92 | 40.48  | 0.075    | YQLSIHQNPNSNNTESK       |
| 139 | gi 50540358  | hypothetical protein LOC436918 [Danio rerio]                                            | 56.6 | 357  | 626.78  | 1251.55 | 1251.62 | 49.54  | 0.011    | LHAVNDAEVER             |
|     |              |                                                                                         |      |      | 1111.50 | 2220.99 | 2220.13 | 92.38  | 4.70E-07 | NAITVEMYNELIEALELAGK    |
| 140 | gi 41056175  | programmed cell death 8 (apoptosis-inducing factor) [Danio rerio]                       | 36.4 | 751  | 614.32  | 1226.63 | 1226.57 | 73.89  | 4.20E-05 | LSDGSEISYEK             |
|     |              |                                                                                         |      |      | 616.35  | 1230.68 | 1228.64 | 73.63  | 5.10E-05 | VENGGVAVLTDR            |
| 141 | gi 148224245 | hypothetical protein LOC793834 [Danio rerio]                                            | 58.2 | 763  | 653.19  | 1304.36 | 1303.71 | 57.40  | 0.0019   | MQLLEIITTDK             |

|     |              |                                                                                                    |      |      |         |         |         |        |          |                          |
|-----|--------------|----------------------------------------------------------------------------------------------------|------|------|---------|---------|---------|--------|----------|--------------------------|
| 142 | gi 189526598 | PREDICTED: similar to COASTER [Danio rerio]                                                        | 42.9 | 916  | 753.25  | 1504.48 | 1503.72 | 81.80  | 6.60E-06 | TAE EVTGLSQEGQR          |
| 143 | gi 47085679  | electron-transfer-flavoprotein, beta polypeptide [Danio rerio]                                     | 70.1 | 254  | 657.66  | 1313.30 | 1312.78 | 53.15  | 0.005    | QAVALS LKEARK            |
| 144 | gi 61806484  | hypothetical protein LOC541328 [Danio rerio]                                                       | 55.2 | 116  | 925.57  | 924.56  | 924.50  | 51.93  | 0.0058   | GIHVEVSGK                |
| 145 | gi 18859423  | spectrin, beta, erythrocytic [Danio rerio]                                                         | 34.8 | 2357 | 601.23  | 1200.44 | 1199.71 | 71.48  | 8.00E-05 | KEEASLIILGK              |
| 146 | gi 189528827 | PREDICTED: similar to LOC567732 protein [Danio rerio]                                              | 31.1 | 1368 | 839.84  | 1677.67 | 1677.88 | 70.20  | 9.60E-05 | TTGLVGLAVSQN PHER        |
| 147 | gi 54261777  | NADH dehydrogenase (ubiquinone) Fe-S protein 8, (NAC)                                              | 22.9 | 210  | 713.91  | 1425.80 | 1425.74 | 51.18  | 0.0074   | HRPDLVDYGNLK             |
| 148 | gi 62955689  | hypothetical protein LOC550556 [Danio rerio]                                                       | 40   | 270  | 945.14  | 1888.27 | 1887.93 | 93.31  | 4.20E-07 | KKHDAIETDIAAYEER         |
| 149 | gi 90652819  | hypothetical protein LOC664756 [Danio rerio]                                                       | 72.1 | 462  | 1212.60 | 2423.18 | 2422.19 | 102.56 | 4.20E-08 | GQNHLEEV ELAFPQNVIEGSGR  |
| 150 | gi 59858543  | gelsolin a [Danio rerio]                                                                           | 27.3 | 730  | 748.62  | 1495.22 | 1495.66 | 70.62  | 8.00E-05 | YVNNQEEATDWK             |
| 151 | gi 41387146  | peroxiredoxin 6 [Danio rerio]                                                                      | 49.1 | 222  | 963.49  | 1924.97 | 1926.95 | 64.51  | 0.0003   | LCEAICPAQAITIEAEP R      |
| 152 | gi 18858299  | ATPase, Na+/K+ transporting, alpha 1a.3 polypeptide [Danio rerio]                                  | 36.8 | 1024 | 585.09  | 1168.17 | 1167.62 | 45.88  | 0.026    | FLEDLGT FVK              |
| 153 | gi 41055718  | fumarate hydratase precursor [Danio rerio]                                                         | 40.1 | 509  | 843.24  | 1684.46 | 1682.84 | 80.84  | 8.00E-06 | AFAEFLTEEIKEEK           |
| 154 | gi 189533701 | PREDICTED: calpastatin [Danio rerio]                                                               | 68.8 | 824  | 1125.33 | 2248.64 | 2246.10 | 46.64  | 0.017    | SQEEEEPDIVSTPNFVVEVTK    |
| 155 | gi 27545251  | solute carrier family 25 alpha, member 5 [Danio rerio]                                             | 65.8 | 298  | 513.65  | 1025.28 | 1024.60 | 76.05  | 2.60E-05 | IGGIGTVPVGR              |
| 156 | gi 48762665  | ubiquinol-cytochrome c reductase core protein II [Danio rerio]                                     | 33   | 454  | 972.45  | 2914.31 | 2915.57 | 43.03  | 0.031    | EGGANGVTLL EALDSILPPSRPT |
| 157 | gi 189533438 | PREDICTED: novel protein similar to vertebrate apolipoprotein A-II [Danio rerio]                   | 42.2 | 2633 | 1071.90 | 2141.79 | 2141.06 | 98.83  | 1.10E-07 | MLEVLGEKPD LPEGASDDVK    |
| 158 | gi 48762667  | collagen, type I, alpha 2 [Danio rerio]                                                            | 89.3 | 1352 | 1052.57 | 2103.13 | 2103.09 | 78.77  | 1.10E-05 | PGILLGDVFPNF EADTTIGK    |
| 159 | gi 116875789 | hypothetical protein LOC768289 [Danio rerio]                                                       | 52.2 | 431  | 877.21  | 1752.40 | 1751.85 | 64.06  | 0.00037  | DAFQNA YLELGG LGER       |
| 160 | gi 59933260  | cardiomyopathy associated 1 [Danio rerio]                                                          | 41.7 | 2297 | 907.46  | 1812.91 | 1810.94 | 70.66  | 7.70E-05 | QGAIVAVTGDGVND SPALK     |
| 161 | gi 68444865  | PREDICTED: dodecenoyl-Coenzyme A delta isomerase [Danio rerio]                                     | 62.8 | 301  | 719.05  | 2154.12 | 2153.18 | 71.07  | 6.50E-05 | EVHEVLLPGLQTL HDALAAK    |
| 162 | gi 41055939  | sorting and assembly machinery component 50 homolog [Danio rerio]                                  | 49.9 | 469  | 1251.82 | 2501.63 | 2501.26 | 47.13  | 0.014    | THTQDAVPLSLGQEF GGYVQQV  |
| 163 | gi 40363541  | S-adenosylhomocysteine hydrolase [Danio rerio]                                                     | 45   | 433  | 1343.82 | 1342.81 | 1342.74 | 51.69  | 0.0071   | HGAGVPAGVPEKPK           |
| 164 | gi 189519969 | PREDICTED: myosin, heavy polypeptide 10, non-muscle like-1, [Danio rerio]                          | 37.6 | 1973 | 735.92  | 1469.83 | 1470.83 | 57.29  | 0.0018   | KHGAGVPAGVPEKPK          |
| 165 | gi 189519965 | PREDICTED: similar to nonmuscle myosin heavy chain IIA [Danio rerio]                               | 37.3 | 1857 | 903.69  | 2708.03 | 2705.32 | 45.36  | 0.02     | QAVEDSSATDLLSSK PSSDVVP  |
| 166 | gi 47086479  | solute carrier family 25 (mitochondrial carrier, Aralar), member 1 [Danio rerio]                   | 37.5 | 682  | 525.09  | 1048.16 | 1047.57 | 57.91  | 0.0019   | VFLDGVDKR                |
| 167 | gi 189516653 | PREDICTED: myosin, heavy chain 9, non-muscle like-1, [Danio rerio]                                 | 41.7 | 1754 | 589.15  | 1176.28 | 1175.67 | 51.37  | 0.0084   | KVFLDGVDKR               |
| 168 | gi 41152365  | ATP synthase, H+ transporting, mitochondrial F1 complex, c subunit [Danio rerio]                   | 18.2 | 159  | 618.38  | 1234.75 | 1232.68 | 68.88  | 0.00014  | DFLAGGIAAAISK            |
| 169 | gi 189537549 | PREDICTED: similar to carnitine O-palmitoyltransferase I [Danio rerio]                             | 44.5 | 773  | 1245.66 | 1244.65 | 1244.68 | 89.06  | 1.50E-06 | KVDFAAAGEPLK             |
| 170 | gi 189537551 | PREDICTED: similar to carnitine O-palmitoyltransferase I [Danio rerio]                             | 40.9 | 753  | 694.50  | 1386.98 | 1385.75 | 48.37  | 0.016    | INAVSSADVNVAK            |
| 171 | gi 58801526  | SET translocation (myeloid leukemia-associated) B [Danio rerio]                                    | 30.9 | 275  | 1230.46 | 2458.90 | 2458.19 | 90.98  | 5.60E-07 | HAINQEINAYNTPAQFGLEGSGI  |
| 172 | gi 58801528  | SET translocation (myeloid leukemia-associated) A [Danio rerio]                                    | 20.1 | 269  | 819.00  | 1635.98 | 1635.80 | 93.63  | 4.10E-07 | GELGPAGPTGPSGAQQQR       |
| 173 | gi 157426949 | hydroxyacyl-Coenzyme A dehydrogenase/3-ketoacyl-CoA synthetase complex, beta subunit [Danio rerio] | 61.2 | 761  | 674.15  | 1346.28 | 1345.65 | 93.62  | 4.60E-07 | AALENSLGDTEAR            |
|     |              |                                                                                                    |      |      | 1039.06 | 2076.11 | 2075.93 | 93.51  | 3.90E-07 | SSLFEHSTFDSQHAAGAER      |
|     |              |                                                                                                    |      |      | 663.31  | 1324.60 | 1325.71 | 84.33  | 3.50E-06 | IGLVDELVPEDK             |
|     |              |                                                                                                    |      |      | 665.69  | 1994.04 | 1992.02 | 64.06  | 0.00033  | TKEDILTYE IADV FHAK      |
|     |              |                                                                                                    |      |      | 719.94  | 1437.87 | 1437.75 | 80.32  | 8.90E-06 | KLDEEVAA AHLDK           |
|     |              |                                                                                                    |      |      | 580.60  | 1738.78 | 1737.89 | 50.92  | 0.0075   | KQELEEILHDLES R          |
|     |              |                                                                                                    |      |      | 1093.81 | 2185.60 | 2184.99 | 80.53  | 7.50E-06 | HAEQERDELADEISNSASGK     |
|     |              |                                                                                                    |      |      | 580.60  | 1738.78 | 1737.89 | 50.92  | 0.0075   |                          |
|     |              |                                                                                                    |      |      | 1093.81 | 2185.60 | 2184.99 | 80.53  | 7.50E-06 |                          |
|     |              |                                                                                                    |      |      | 1325.66 | 1324.65 | 1324.74 | 91.10  | 7.40E-07 | TVHLLAGVADTTK            |
|     |              |                                                                                                    |      |      | 668.73  | 1335.44 | 1333.80 | 38.77  | 0.13     | GLLPQLIGVAPEK            |
|     |              |                                                                                                    |      |      | 613.78  | 1225.54 | 1222.63 | 38.19  | 0.15     | AGVLAHLEER               |
|     |              |                                                                                                    |      |      | 575.06  | 1722.16 | 1721.89 | 51.85  | 0.0064   | KQELEEILHDLEAR           |
|     |              |                                                                                                    |      |      | 865.31  | 1728.60 | 1725.94 | 53.58  | 0.0041   | QLLQANPILEAFGNAK         |
|     |              |                                                                                                    |      |      | 894.30  | 2679.86 | 2678.38 | 56.37  | 0.0016   | KLEGDSTELHDQIAELQAQIAEL  |
|     |              |                                                                                                    |      |      | 733.15  | 1464.28 | 1462.69 | 89.95  | 9.80E-07 | AQSELVSASDEATR           |
|     |              |                                                                                                    |      |      | 944.52  | 1887.03 | 1886.90 | 89.00  | 1.10E-06 | SEPQPGEEFLAALTAGDR       |
|     |              |                                                                                                    |      |      | 944.52  | 1887.03 | 1886.90 | 89.00  | 1.10E-06 |                          |
|     |              |                                                                                                    |      |      | 1098.28 | 2194.55 | 2194.01 | 88.55  | 1.10E-06 | EQQEAI EHIDEVQNEIDR      |
|     |              |                                                                                                    |      |      | 1098.28 | 2194.55 | 2194.01 | 88.55  | 1.10E-06 |                          |
|     |              |                                                                                                    |      |      | 653.19  | 1304.36 | 1303.71 | 57.40  | 0.0019   | MQLLEITTDK               |

|     |              |                                                                |      |         |         |         |         |          |                                  |
|-----|--------------|----------------------------------------------------------------|------|---------|---------|---------|---------|----------|----------------------------------|
|     |              |                                                                |      | 881.72  | 1761.43 | 1760.86 | 59.25   | 0.0012   | LTAPPAVSSDEDIQYR                 |
| 174 | gi 189517055 | PREDICTED: similar to heat shock protein 8 [Danio rerio]       | 60.9 | 698     | 831.22  | 1660.43 | 1658.89 | 86.78    | 2.10E-06 IINEPTAAAIAYGLDK        |
| 175 | gi 47085775  | heat shock 70kDa protein 5 [Danio rerio]                       | 40.6 | 650     | 831.22  | 1660.43 | 1658.89 | 86.78    | 2.10E-06 IINEPTAAAIAYGLDK        |
| 176 | gi 116235424 | hypothetical protein LOC572011 [Danio rerio]                   | 38.2 | 823     | 1268.25 | 2534.48 | 2533.22 | 86.76    | 1.50E-06 YEVEISNLQASFLQSQHQER    |
| 177 | gi 41152028  | prohibitin [Danio rerio]                                       | 62.7 | 271     | 575.24  | 1148.46 | 1148.58 | 43.36    | 0.052 FDAGELITQR                 |
|     |              |                                                                |      | 576.00  | 1149.98 | 1148.58 | 84.24   | 4.00E-06 |                                  |
| 178 | gi 160333682 | heat shock protein 8 [Danio rerio]                             | 56.4 | 649     | 831.22  | 1660.43 | 1658.89 | 86.78    | 2.10E-06 IINEPTAAAIAYGLDK        |
| 179 | gi 41055742  | selenium binding protein 1 [Danio rerio]                       | 52.3 | 457     | 846.88  | 2537.62 | 2537.25 | 89.21    | 8.50E-07 LNENFLVDFGAEPEGPALAHელი |
| 180 | gi 148922856 | hypothetical protein LOC559194 [Danio rerio]                   | 36.8 | 106     | 1069.99 | 2137.96 | 2136.73 | 83.54    | 3.70E-06 GADDEDEDEDEDDVDPK       |
| 181 | gi 45356145  | tumor protein D52-like 2 isoform 2 [Danio rerio]               | 45.9 | 185     | 737.79  | 1473.56 | 1473.69 | 75.37    | 3.00E-05 GLGSDSISDLPEER          |
| 182 | gi 47086533  | 2-peptidylprolyl isomerase A [Danio rerio]                     | 73.8 | 164     | 820.04  | 1638.07 | 1637.91 | 82.77    | 5.00E-06 HVVFGQVVEGLDVIK         |
| 183 | gi 47086875  | glutamate dehydrogenase 1a [Danio rerio]                       | 49.6 | 544     | 793.50  | 1584.99 | 1582.78 | 52.69    | 0.0054 IIAEGANGPTTPEADK          |
|     |              |                                                                |      | 863.73  | 1725.45 | 1722.87 | 56.83   | 0.0019   | HGGAIPVPTSDFQER                  |
| 184 | gi 18858379  | carbonic anhydrase [Danio rerio]                               | 57.7 | 260     | 501.56  | 1001.11 | 1000.54 | 65.27    | 0.00038 VLDALDDIK                |
|     |              |                                                                |      | 824.69  | 2471.05 | 2471.13 | 51.80   | 0.0048   | QFHFWGSSDDKGSEHTIAGT             |
| 185 | gi 51010975  | hypothetical protein LOC445053 [Danio rerio]                   | 39.7 | 204     | 853.63  | 1705.25 | 1704.91 | 79.51    | 1.10E-05 GATYGKPVHHGVNQIK        |
| 186 | gi 45387723  | hypothetical protein LOC402952 [Danio rerio]                   | 54.1 | 331     | 1181.36 | 3541.04 | 3539.71 | 57.14    | 0.00093 GEDYPPPPPPHYPPHPHDHPH    |
| 187 | gi 41152189  | hypothetical protein LOC393720 [Danio rerio]                   | 46.7 | 244     | 820.76  | 1639.51 | 1638.85 | 68.04    | 0.00015 RVEAIINNYPEGHK           |
| 188 | gi 68389723  | PREDICTED: catechol-O-methyltransferase domain cont            | 56.7 | 238     | 777.69  | 1553.37 | 1553.87 | 47.03    | 0.019 KGGIVAINVLWGGR             |
|     |              |                                                                |      | 1028.82 | 2055.62 | 2055.00 | 68.70   | 0.00011  | SHEGDDPLLQYVVNNSLR               |
| 189 | gi 41386743  | eukaryotic translation elongation factor 2, like [Danio rerio] | 53   | 858     | 703.58  | 1405.14 | 1404.80 | 48.13    | 0.016 TFAQLILDPIFK               |
|     |              |                                                                |      | 715.78  | 2144.30 | 2144.05 | 61.83   | 0.00055  | ARPPDGLAEDIDKGDVSSR              |
| 190 | gi 189521142 | PREDICTED: similar to phosphatidylinositol-binding clath       | 37.3 | 587     | 1258.24 | 3771.69 | 3770.92 | 78.08    | 6.70E-06 VAEQVGIDQGDPDLTQAPSSLL  |
| 191 | gi 41152448  | NADH dehydrogenase (ubiquinone) 1 alpha subcomplex,            | 34.6 | 355     | 680.96  | 1359.90 | 1358.56 | 78.04    | 1.60E-05 YAEGYNEDVGDK            |
| 192 | gi 189535920 | PREDICTED: similar to Filamin-A (Alpha-filamin) (Filamin       | 51.1 | 2523    | 719.89  | 1437.77 | 1437.71 | 66.30    | 0.00022 TFEPAEFIIDTR             |
|     |              |                                                                |      | 825.27  | 1648.52 | 1645.89 | 44.74   | 0.034    | VHGPGLQSGITNKPNK                 |
| 193 | gi 41054571  | citrate synthase [Danio rerio]                                 | 37.8 | 468     | 882.18  | 1762.35 | 1761.88 | 77.97    | 1.60E-05 GLVYETSVLDPDEGIR        |
| 194 | gi 189538466 | PREDICTED: similar to alpha 2 actin [Danio rerio]              | 71.2 | 132     | 1115.49 | 2228.97 | 2227.06 | 77.92    | 1.30E-05 DLYANNVLSGGTTMYPGIADR   |
| 195 | gi 47086703  | dihydrolipoamide S-acetyltransferase (E2 component of p        | 57.5 | 652     | 736.66  | 1471.31 | 1471.73 | 77.62    | 1.70E-05 GVDITQVTGTGPDGR         |
| 196 | gi 153791915 | hypothetical protein LOC100006671 [Danio rerio]                | 46.4 | 151     | 761.94  | 1521.86 | 1520.71 | 64.59    | 0.00033 AGTQIENIEEDFR            |
|     |              |                                                                |      | 826.70  | 1651.38 | 1648.81 | 54.98   | 0.0031   | KAGTQIENIEEDFR                   |
| 197 | gi 125852449 | PREDICTED: wu:fb57a10 [Danio rerio]                            | 30.2 | 603     | 1108.23 | 2214.44 | 2213.98 | 77.43    | 1.50E-05 KDDGTFYEFGEDIPEAPER     |
| 198 | gi 52219050  | hypothetical protein LOC447859 [Danio rerio]                   | 63.2 | 617     | 639.24  | 1276.47 | 1274.63 | 40.56    | 0.094 NLAIYDGPEQR                |
|     |              |                                                                |      | 928.72  | 2783.12 | 2782.39 | 76.93   | 1.40E-05 | ITDENLQSQTTGLYIPEYEEALKI         |
| 199 | gi 189537447 | PREDICTED: similar to Ndufa9 protein [Danio rerio]             | 50.5 | 380     | 691.63  | 1381.25 | 1379.71 | 59.25    | 0.0012 FFEAAVGEAKPSK             |
| 200 | gi 50539810  | hypothetical protein LOC436644 [Danio rerio]                   | 65   | 463     | 513.65  | 1025.28 | 1024.60 | 76.05    | 2.60E-05 IGGIGTVPVGR             |
| 201 | gi 189527793 | PREDICTED: wu:fb05a01 [Danio rerio]                            | 49.7 | 6009    | 578.98  | 1155.95 | 1155.65 | 43.42    | 0.05 LKGDVDVSVPK                 |
|     |              |                                                                |      | 586.18  | 1170.34 | 1169.67 | 37.19   | 0.21     | LKGEVDVSVPK                      |
|     |              |                                                                |      | 844.25  | 1686.48 | 1685.81 | 76.64   | 2.20E-05 | VELEGPEIEGPEGGFK                 |
| 202 | gi 189514551 | PREDICTED: sorbin and SH3 domain containing 2a [Danio rerio]   | 35.2 | 2115    | 643.76  | 1285.50 | 1284.76 | 43.24    | 0.049 KSPTPVPLPPR                |
|     |              |                                                                |      | 1418.91 | 2835.81 | 2835.44 | 67.01   | 0.00013  | GAFTPSPLDPASTSDSHIASLSIK         |
| 203 | gi 46559752  | ATPase, Na+/K+ transporting, beta 1a polypeptide [Danio rerio] | 37.6 | 306     | 659.50  | 1316.99 | 1315.59 | 65.66    | 0.00029 VYGENIDYSEK              |
| 204 | gi 50344731  | fibrinogen alpha chain [Danio rerio]                           | 46.6 | 684     | 750.41  | 1498.80 | 1498.69 | 74.11    | 3.70E-05 FPTSGETGSTSQTSNK        |
| 205 | gi 61806580  | hypothetical protein LOC541378 [Danio rerio]                   | 45.8 | 448     | 919.52  | 1837.03 | 1836.96 | 73.38    | 4.10E-05 DKPHLNIGTIGHVDHGK       |
| 206 | gi 113679439 | hypothetical protein LOC751638 [Danio rerio]                   | 73   | 126     | 491.53  | 981.05  | 980.52  | 44.06    | 0.039 LVHHELPH                   |
|     |              |                                                                |      | 636.68  | 1271.35 | 1272.68 | 66.20   | 0.00026  | GQDPYSILRPK                      |
| 207 | gi 125832496 | PREDICTED: similar to mCG2694 [Danio rerio]                    | 49   | 308     | 549.82  | 1097.62 | 1098.61 | 47.95    | 0.017 QLADALKANR                 |
|     |              |                                                                |      | 551.01  | 1100.01 | 1098.61 | 51.89   | 0.0078   |                                  |
| 208 | gi 21426835  | glucose phosphate isomerase a [Danio rerio]                    | 36.5 | 553     | 717.61  | 1433.21 | 1432.70 | 72.64    | 5.50E-05 ELQASGLSGDSLEK          |
| 209 | gi 70778808  | vesicle amine transport protein 1 [Danio rerio]                | 27.3 | 484     | 904.88  | 1807.74 | 1806.90 | 72.42    | 5.30E-05 HEVISQGGVTHPIDYR        |
| 210 | gi 66472610  | hypothetical protein LOC553595 [Danio rerio]                   | 53.8 | 275     | 1285.40 | 2568.79 | 2566.31 | 71.92    | 4.50E-05 STPTDLVTEADHQVEELIISTLR |
| 211 | gi 50540008  | zgc:92882 [Danio rerio]                                        | 41   | 334     | 595.62  | 1189.23 | 1188.61 | 71.56    | 8.00E-05 VIGSGTNLDSAR            |

|     |              |                                                              |      |      |         |         |         |       |                                   |
|-----|--------------|--------------------------------------------------------------|------|------|---------|---------|---------|-------|-----------------------------------|
| 212 | gi 189537196 | PREDICTED: similar to L-lactate dehydrogenase B chain        | 32.3 | 285  | 595.62  | 1189.23 | 1188.61 | 71.56 | 8.00E-05                          |
| 213 | gi 46358344  | isocitrate dehydrogenase 3 (NAD+) alpha [Danio rerio]        | 35.1 | 365  | 1251.99 | 2501.97 | 2501.23 | 71.48 | 5.10E-05 ENTEGEYSGLIEHVIVDGVVQSIK |
| 214 | gi 56693297  | hypothetical protein LOC494070 [Danio rerio]                 | 53.8 | 182  | 952.76  | 1903.50 | 1902.91 | 71.41 | 6.40E-05 AKEELEQELADKEDEK         |
| 215 | gi 157073897 | ubiquinol-cytochrome c reductase, Rieske iron-sulfur poly    | 72.9 | 273  | 773.18  | 1544.35 | 1542.79 | 77.14 | 2.00E-05 EIETEAGVNLALER           |
| 216 | gi 30017425  | ATPase, Na+/K+ transporting, alpha 1a.5 polypeptide [Dre     | 44.4 | 1023 | 907.46  | 1812.91 | 1810.94 | 70.66 | 7.70E-05 QGAIVAVTGDGVNDSPALK      |
| 217 | gi 189517050 | PREDICTED: glycine C-acetyltransferase [Danio rerio]         | 43.9 | 458  | 610.07  | 1218.13 | 1217.64 | 47.64 | 0.02 ALGGAAGGYTVGPK               |
|     |              |                                                              |      |      | 610.91  | 1219.80 | 1217.64 | 59.61 | 0.0012                            |
| 218 | gi 41053309  | hydroxyacylglutathione hydrolase [Danio rerio]               | 46.2 | 260  | 970.67  | 1939.33 | 1938.91 | 70.11 | 8.40E-05 TVLTTHHHWDHAGGNEK        |
| 219 | gi 47085833  | glyceraldehyde-3-phosphate dehydrogenase, spermatog          | 52.8 | 335  | 718.69  | 1435.37 | 1434.76 | 70.02 | 9.90E-05 GAHQNIIPASTGAAK          |
| 220 | gi 50300477  | coatamer protein complex, subunit beta 1 [Danio rerio]       | 52.4 | 953  | 830.92  | 2489.74 | 2489.26 | 69.90 | 7.30E-05 NFEHLIPDAPELIHDFLVNEK    |
| 221 | gi 47086505  | fibrinogen, B beta polypeptide [Danio rerio]                 | 61.4 | 485  | 1376.68 | 1375.67 | 1375.70 | 48.29 | 0.015 DTVDVTFPQNIK                |
|     |              |                                                              |      |      | 916.63  | 1831.25 | 1828.90 | 54.48 | 0.0033 ETYSPGPVSQPPISGGTR         |
| 222 | gi 113678458 | vitellogenin 2 isoform 1 [Danio rerio]                       | 46.7 | 1631 | 588.13  | 1174.25 | 1172.62 | 53.92 | 0.0048 LEFEVQVGPR                 |
| 223 | gi 57525836  | hypothetical protein LOC445175 [Danio rerio]                 | 43   | 697  | 651.91  | 1301.80 | 1301.66 | 68.64 | 0.00015 SHIDELYANIK               |
| 224 | gi 189536555 | PREDICTED: hypothetical protein [Danio rerio]                | 31.7 | 454  | 774.22  | 1546.42 | 1545.72 | 68.37 | 0.00015 YPEPVEGAEAGELK            |
| 225 | gi 54400408  | myosin, light chain 6, alkali, smooth muscle and non-mus     | 41.1 | 151  | 997.69  | 996.68  | 996.56  | 60.30 | 0.00094 HVLTTLGEK                 |
|     |              |                                                              |      |      | 677.17  | 1352.33 | 1351.75 | 49.02 | 0.012 ALGQNPVNAEVLK               |
| 226 | gi 47174755  | myosin light chain alkali, smooth-muscle isoform [Danio r    | 29.8 | 151  | 997.69  | 996.68  | 996.56  | 60.30 | 0.00094                           |
|     |              |                                                              |      |      | 677.17  | 1352.33 | 1351.75 | 49.02 | 0.012                             |
| 227 | gi 189516972 | PREDICTED: similar to Myosin light polypeptide 4 (Myos       | 44.4 | 187  | 966.89  | 965.88  | 966.55  | 56.68 | 0.0021 HVLATLGEK                  |
| 228 | gi 41055823  | hypothetical protein LOC393488 [Danio rerio]                 | 28   | 186  | 966.89  | 965.88  | 966.55  | 56.68 | 0.0021                            |
| 229 | gi 156616344 | hypothetical protein LOC100124599 [Danio rerio]              | 57.6 | 278  | 745.69  | 1489.36 | 1488.74 | 65.97 | 0.00026 ENQSVLITGESGAGK           |
| 230 | gi 41393125  | tyrosine 3-monooxygenase/tryptophan 5-monooxygenase          | 58   | 245  | 640.25  | 1278.49 | 1278.65 | 60.54 | 0.00091 YLAEVAAGDDKK              |
|     |              |                                                              |      |      | 691.66  | 1381.30 | 1379.66 | 48.36 | 0.014 YLIENSSNPESK                |
| 231 | gi 58801524  | LIM domain containing preferred translocation partner in     | 40.5 | 556  | 1098.63 | 2195.24 | 2193.06 | 60.16 | 0.00079 AEPShHPAPTPSQGYQPAPPK     |
| 232 | gi 113865949 | zgc:161979 [Danio rerio]                                     | 48.5 | 130  | 628.15  | 1254.29 | 1253.63 | 67.07 | 0.0002 YFQDLVDNLK                 |
| 233 | gi 49227667  | popeye domain containing 1 [Danio rerio]                     | 42.4 | 316  | 660.79  | 1319.56 | 1319.63 | 66.75 | 0.00022 GGSTGSSLPVTSR             |
| 234 | gi 148596955 | ATP synthase, H+ transporting, mitochondrial F0 comple       | 54.9 | 71   | 817.25  | 1632.48 | 1631.83 | 66.73 | 0.00022 RYDNLKPIAEER              |
| 235 | gi 62955727  | NADH dehydrogenase (ubiquinone) 1 beta subcomplex, !         | 31.4 | 175  | 814.44  | 1626.87 | 1625.79 | 66.52 | 0.00022 EVQQLQSETPADGPK           |
| 236 | gi 189531406 | PREDICTED: similar to nicotinamide nucleotide transhyd       | 44.6 | 679  | 567.50  | 1132.99 | 1130.59 | 41.62 | 0.077 SVAELEAEKR                  |
|     |              |                                                              |      |      | 649.20  | 1296.39 | 1296.77 | 66.51 | 0.00022 VSVSPAGVELLVK             |
| 237 | gi 41056085  | keratin 8 [Danio rerio]                                      | 43.8 | 520  | 1486.79 | 1485.78 | 1485.71 | 50.29 | 0.0093 ANLENQIAEAEER              |
|     |              |                                                              |      |      | 1009.90 | 2017.79 | 2017.16 | 48.42 | 0.012 SLLAPLNLEIDPNIQIVR          |
| 238 | gi 51010955  | hypothetical protein LOC445042 [Danio rerio]                 | 71.2 | 104  | 608.74  | 1215.47 | 1215.65 | 66.19 | 0.00028 ALTAGSEASGKPK             |
| 239 | gi 56693302  | heat shock protein, alpha-crystallin-related, 1 [Danio reric | 42.7 | 199  | 667.73  | 1333.44 | 1332.69 | 62.89 | 0.00053 KYTLPPGVDSEK              |
| 240 | gi 47086247  | proto galectin Gal1-L2 [Danio rerio]                         | 44   | 134  | 893.49  | 2677.44 | 2675.32 | 54.23 | 0.0026 ITFTNEEFLVTLPDGSEIHFPNR    |
| 241 | gi 41053395  | glutamate oxaloacetate transaminase 2 [Danio rerio]          | 43.2 | 428  | 555.66  | 1109.31 | 1107.59 | 56.05 | 0.0025 KMNLVGVGAYR                |
|     |              |                                                              |      |      | 926.44  | 1850.87 | 1850.98 | 45.42 | 0.025 ALDKEYLGVGLGDFNK            |
|     |              |                                                              |      |      | 665.76  | 1994.24 | 1994.03 | 43.33 | 0.04 YFIEQGHNILLSQSFAK            |
| 242 | gi 189521842 | PREDICTED: similar to Histone H1.5 (Histone H1a) isofo       | 80.4 | 194  | 556.09  | 1110.16 | 1108.54 | 64.97 | 0.00033 ALSAGGYDVEK               |
| 243 | gi 68444185  | PREDICTED: cytochrome c oxidase subunit Vab [Danio r         | 82   | 172  | 614.69  | 1227.37 | 1225.51 | 50.85 | 0.0088 VETDEEFDSR                 |
|     |              |                                                              |      |      | 1144.30 | 3429.88 | 3427.84 | 47.59 | 0.0089 EIYPYVIQELKPTLQELGISTPEE   |
| 244 | gi 113678983 | hypothetical protein LOC751707 [Danio rerio]                 | 42.2 | 606  | 1090.87 | 2179.73 | 2179.07 | 64.88 | 0.00027 GGNIYPAEIEQFLHHPK         |
| 245 | gi 18858657  | fatty acid binding protein 7, brain, a [Danio rerio]         | 54.5 | 132  | 749.60  | 1497.18 | 1496.63 | 63.80 | 0.00039 LGEEFDETTADDR             |
| 246 | gi 27545301  | laminin, beta 1 [Danio rerio]                                | 53.4 | 1785 | 1065.04 | 2128.06 | 2128.10 | 63.70 | 0.00037 VGSLTDVEDILNQSAADILR      |
| 247 | gi 47271384  | cofilin 2, like [Danio rerio]                                | 67.9 | 165  | 1207.39 | 2412.76 | 2412.16 | 63.61 | 0.00033 HIIMEQQQEILQGDEGDPYLK     |
| 248 | gi 41055546  | hypothetical protein LOC393186 [Danio rerio]                 | 73   | 281  | 675.75  | 1349.49 | 1347.70 | 62.34 | 0.00057 VALDTSFVPNTGK             |
| 249 | gi 40548314  | H1 histone family, member X [Danio rerio]                    | 56.8 | 192  | 866.08  | 1730.15 | 1729.89 | 62.32 | 0.00057 PAVVEESAPAPAPAPAEK        |
| 250 | gi 52218912  | enoyl Coenzyme A hydratase, short chain, 1, mitochondr       | 48.1 | 291  | 1056.37 | 2110.72 | 2110.12 | 62.20 | 0.00051 AQFGQPEILLGTIPGAGGTQR     |
| 251 | gi 113678344 | BCL2-like 13 (apoptosis facilitator) [Danio rerio]           | 45.8 | 485  | 1029.90 | 3086.66 | 3085.41 | 61.92 | 0.00038 SLDSAEGVALAEQSENNSNS      |
| 252 | gi 38198629  | solute carrier family 4, anion exchanger, member 1 [Dani     | 24.5 | 905  | 826.71  | 1651.40 | 1649.80 | 61.90 | 0.00062 RGDAESYVELNELR            |
| 253 | gi 53933242  | cytochrome c oxidase subunit VIa polypeptide 1 [Danio r      | 52.8 | 108  | 1171.65 | 2341.28 | 2341.05 | 61.51 | 0.00055 TLFHNPHVNALPDGYEHHDE      |

|     |              |                                                              |      |      |         |         |         |       |         |                        |
|-----|--------------|--------------------------------------------------------------|------|------|---------|---------|---------|-------|---------|------------------------|
| 254 | gj 40254661  | annexin A5 [Danio rerio]                                     | 50.8 | 317  | 1143.81 | 2285.61 | 2284.98 | 61.28 | 0.0006  | EHDKDLEEDVTGDTGGHFER   |
| 255 | gj 52219022  | hypothetical protein LOC447845 [Danio rerio]                 | 33.5 | 462  | 990.77  | 1979.53 | 1977.05 | 49.87 | 0.0089  | VLIFQEENEIPSSVFK       |
| 256 | gj 189536521 | PREDICTED: similar to phosphofructokinase, platelet [Dæ      | 62.1 | 789  | 1115.74 | 2229.46 | 2229.10 | 60.89 | 0.00066 | TSYDVSDSGQLHVVVNRPK    |
| 257 | gj 189522065 | PREDICTED: similar to Histone H1.2 (H1 VAR.1) (H1c) [I       | 60.5 | 200  | 521.08  | 1040.14 | 1038.61 | 54.49 | 0.0037  | AGPGVGELIVK            |
|     |              |                                                              |      |      | 456.55  | 1366.61 | 1365.83 | 44.62 | 0.033   | AKKAGPGVGELIVK         |
| 258 | gj 61651682  | fibronectin 1b [Danio rerio]                                 | 43.9 | 2408 | 766.21  | 1530.41 | 1529.75 | 50.29 | 0.0095  | GGQGPTFSELVGP          |
|     |              |                                                              |      |      | 995.13  | 1988.24 | 1987.01 | 41.68 | 0.057   | ILEEVVTAGNTVPGDATSSK   |
|     |              |                                                              |      |      | 1070.96 | 3209.84 | 3208.44 | 37.88 | 0.093   | INTVGPTGHDSTDAHGHVEYT  |
| 259 | gj 189534068 | PREDICTED: nuclear RNA export factor 1 [Danio rerio]         | 45.8 | 642  | 731.21  | 1460.40 | 1460.65 | 60.46 | 0.00091 | FGRRGGGGGGGGPSDGR      |
| 260 | gj 41055658  | 3-hydroxyisobutyrate dehydrogenase b [Danio rerio]           | 66.9 | 329  | 667.28  | 1332.54 | 1331.67 | 45.39 | 0.03    | DLGLAQNSATNTK          |
|     |              |                                                              |      |      | 865.58  | 1729.14 | 1729.95 | 49.58 | 0.01    | KGSLIDSSTIDPAVSK       |
| 261 | gj 55742376  | sex hormone binding globulin [Danio rerio]                   | 51.4 | 381  | 495.50  | 988.99  | 987.52  | 59.46 | 0.0014  | LAEEQLTGK              |
| 262 | gj 41053347  | mitochondrial trifunctional protein, beta subunit [Danio rei | 48   | 471  | 561.19  | 1120.36 | 1119.56 | 49.10 | 0.014   | LEQDEFALR              |
|     |              |                                                              |      |      | 709.86  | 1417.70 | 1415.77 | 53.33 | 0.0049  | DQLLLGPTYATPK          |
| 263 | gj 189517202 | PREDICTED: NADH dehydrogenase (ubiquinone) 1, alph           | 70.6 | 153  | 812.60  | 1623.19 | 1621.83 | 58.87 | 0.0013  | LMTPEEIVTYIADK         |
| 264 | gj 68357880  | PREDICTED: similar to slow troponin T 1 [Danio rerio]        | 21.3 | 268  | 509.03  | 1016.05 | 1015.47 | 58.74 | 0.0017  | VDFDDIHR               |
| 265 | gj 31377814  | troponin T1, skeletal, slow [Danio rerio]                    | 15.9 | 290  | 509.03  | 1016.05 | 1015.47 | 58.74 | 0.0017  | VDFDDLHR               |
| 266 | gj 189520524 | PREDICTED: similar to Troponin T2, cardiac [Danio rerio]     | 25.1 | 243  | 509.03  | 1016.05 | 1015.47 | 58.74 | 0.0017  |                        |
| 267 | gj 41152453  | tyrosine 3-monooxygenase/tryptophan 5-monooxygenase          | 48.6 | 245  | 1073.03 | 2144.04 | 2143.98 | 57.93 | 0.0013  | TAFDEAIAELDSLNEESYK    |
| 268 | gj 51467909  | ATP synthase, H+ transporting, mitochondrial F1 comple:      | 73.2 | 209  | 637.58  | 1273.14 | 1272.67 | 52.09 | 0.0067  | SLDKVEQELGR            |
|     |              |                                                              |      |      | 920.90  | 1839.79 | 1838.03 | 36.05 | 0.22    | VSPITINLINVLENGR       |
| 269 | gj 189530481 | PREDICTED: similar to LIM domain-containing protein 1        | 61   | 490  | 843.76  | 1685.51 | 1684.80 | 56.53 | 0.0022  | HHSTIIQHNDGPSSR        |
| 270 | gj 189535572 | PREDICTED: hypothetical protein [Danio rerio]                | 72.7 | 455  | 758.93  | 1515.84 | 1517.74 | 37.74 | 0.17    | CPDCPGLLPLHEPK         |
|     |              |                                                              |      |      | 654.52  | 1960.54 | 1959.96 | 44.47 | 0.031   | FHDHRPGSVHPLGPDHR      |
| 271 | gj 189530774 | PREDICTED: ryanodine receptor 2b (cardiac) [Danio reri       | 38.7 | 4882 | 727.63  | 2179.85 | 2177.92 | 36.56 | 0.18    | EEDFHAVQDEEEDTETKK     |
|     |              |                                                              |      |      | 779.29  | 2334.84 | 2333.25 | 50.22 | 0.0073  | HLTTGSFLGLIHDQGLQLVER  |
| 272 | gj 68362968  | PREDICTED: similar to TAF6-like RNA polymerase II, p3        | 55.9 | 641  | 819.52  | 1637.03 | 1636.94 | 56.28 | 0.0022  | EINLVELALATNIPK        |
| 273 | gj 74315945  | hypothetical protein LOC613246 [Danio rerio]                 | 54   | 422  | 1048.00 | 2093.99 | 2092.98 | 56.22 | 0.002   | ALVGNEASEELQSADGNPHR   |
| 274 | gj 68365370  | PREDICTED: hypothetical protein LOC325885 [Danio rei         | 33   | 276  | 445.53  | 889.04  | 887.48  | 56.13 | 0.0032  | RSVELER                |
| 275 | gj 32401408  | annexin A11b [Danio rerio]                                   | 39.2 | 485  | 886.76  | 1771.51 | 1770.84 | 56.08 | 0.0023  | SLYTHISGDTSGDYKK       |
| 276 | gj 125822895 | PREDICTED: similar to phospholipase A2, group IVC (cy        | 47.6 | 548  | 878.65  | 1755.29 | 1754.84 | 56.05 | 0.0023  | IQEFFTQSTPAEETK        |
| 277 | gj 47085823  | acyl-Coenzyme A dehydrogenase, C-4 to C-12 straight cl       | 58.7 | 424  | 609.57  | 1217.13 | 1216.67 | 56.22 | 0.0028  | GITFEDVVIPK            |
| 278 | gj 50080164  | 5'-3' exoribonuclease 2 [Danio rerio]                        | 28.7 | 540  | 530.06  | 1058.11 | 1060.53 | 55.24 | 0.0037  | MREEVIER               |
| 279 | gj 41054573  | hydroxysteroid dehydrogenase like 2 [Danio rerio]            | 59   | 415  | 785.87  | 1569.72 | 1568.74 | 55.00 | 0.0031  | HMEAHGATPAFTTAK        |
| 280 | gj 47086649  | F-actin capping protein alpha-1 subunit [Danio rerio]        | 15.4 | 286  | 717.26  | 2148.76 | 2147.02 | 54.51 | 0.003   | LDGSEDQVLITEHGDLGHGR   |
| 281 | gj 189525013 | PREDICTED: im:7145727 [Danio rerio]                          | 74.5 | 561  | 530.57  | 1059.12 | 1057.54 | 54.32 | 0.0046  | AVEIVEAGDR             |
| 282 | gj 41152346  | hypothetical protein LOC393668 [Danio rerio]                 | 58.2 | 433  | 572.55  | 1143.09 | 1142.61 | 54.32 | 0.0042  | IGAEVYHNLK             |
| 283 | gj 47086189  | propionyl Coenzyme A carboxylase, beta polypeptide [Dæ       | 65.2 | 557  | 847.73  | 1693.44 | 1692.80 | 54.30 | 0.0036  | GKQNQAEAEAEYVEK        |
| 284 | gj 57525801  | hypothetical protein LOC445183 [Danio rerio]                 | 34   | 200  | 518.13  | 1034.24 | 1032.60 | 54.10 | 0.0045  | TGNIFLQLK              |
| 285 | gj 113678245 | hypothetical protein LOC558738 [Danio rerio]                 | 64   | 111  | 873.28  | 1744.54 | 1744.90 | 52.89 | 0.0049  | SIHALSVAPSTVGDYTK      |
| 286 | gj 189532065 | PREDICTED: similar to acyl-Coenzyme A dehydrogenase          | 34.6 | 442  | 771.24  | 1540.46 | 1539.72 | 53.98 | 0.0038  | AQDTAELFFEDVR          |
| 287 | gj 41056265  | acyl-Coenzyme A dehydrogenase, long chain [Danio reri        | 33.5 | 442  | 771.24  | 1540.46 | 1539.72 | 53.98 | 0.0038  |                        |
| 288 | gj 52219190  | hypothetical protein LOC447942 [Danio rerio]                 | 81.6 | 103  | 1167.88 | 3500.62 | 3500.62 | 53.66 | 0.0021  | TKPWPWGDGNHSLFHNPHNTNA |
| 289 | gj 189517212 | PREDICTED: similar to myosin, heavy polypeptide 11, sr       | 40.6 | 1994 | 865.31  | 1728.60 | 1725.94 | 53.58 | 0.0041  | QLLQANPILEAFGNAK       |
| 290 | gj 168229163 | cysteine-rich protein 2 [Danio rerio]                        | 68.9 | 206  | 999.01  | 2993.99 | 2996.41 | 51.77 | 0.004   | TAAAGSHAEHDGQPYCHKPCY/ |
| 291 | gj 189529657 | PREDICTED: similar to nonmuscle myosin heavy chain [I        | 40.8 | 1962 | 865.31  | 1728.60 | 1725.94 | 53.58 | 0.0041  | QLLQANPILEAFGNAK       |
| 292 | gj 189525028 | PREDICTED: wu:fi27h03 [Danio rerio]                          | 44.9 | 3392 | 483.04  | 964.07  | 963.54  | 53.06 | 0.0054  | INLSAATFK              |
| 293 | gj 123858772 | protein phosphatase 1, catalytic subunit, beta [Danio reri   | 50.2 | 327  | 977.65  | 1953.29 | 1952.12 | 53.02 | 0.0042  | EIFLSQPILLELEAPLK      |
| 294 | gj 41056123  | phosphoglycerate mutase 2 (muscle) [Danio rerio]             | 49.8 | 255  | 632.78  | 1263.55 | 1263.70 | 49.54 | 0.012   | NVIAAHGNSLR            |
|     |              |                                                              |      |      | 828.74  | 1655.46 | 1653.91 | 42.52 | 0.053   | ALPFWNEVIVPEIK         |
| 295 | gj 41054025  | adenylosuccinate lyase [Danio rerio]                         | 36.1 | 482  | 762.75  | 2285.22 | 2284.20 | 52.32 | 0.0047  | VQADPYFAPILGELDALLDPK  |
| 296 | gj 189522138 | PREDICTED: similar to paxillin [Danio rerio]                 | 41.7 | 527  | 1149.87 | 2297.72 | 2294.99 | 45.75 | 0.021   | TWHPEHFVCTHCQEEIGSR    |



|     |              |                                                             |      |       |         |         |         |       |        |                        |
|-----|--------------|-------------------------------------------------------------|------|-------|---------|---------|---------|-------|--------|------------------------|
| 297 | gj 189521681 | PREDICTED: im:7139872 [Danio rerio]                         | 35.8 | 584   | 842.74  | 1683.47 | 1682.82 | 51.16 | 0.0072 | HQVETSQEANTQALK        |
| 298 | gj 55925233  | suppressor of variegation 4-20 [Danio rerio]                | 45.5 | 808   | 601.52  | 1201.02 | 1199.66 | 51.06 | 0.009  | RSQANISSLPK            |
| 299 | gj 27545305  | laminin, gamma 1 [Danio rerio]                              | 58.4 | 1593  | 665.17  | 1328.32 | 1327.68 | 51.01 | 0.0083 | RAEAAALGNAAADAK        |
| 300 | gj 89886285  | endothelial PAS domain protein 1 [Danio rerio]              | 32.6 | 832   | 576.62  | 1151.22 | 1150.59 | 50.92 | 0.0084 | LFSLDTQEAK             |
| 301 | gj 189532432 | PREDICTED: novel protein similar to vertebrate AT rich ii   | 30.8 | 2113  | 653.19  | 1304.36 | 1303.77 | 48.47 | 0.015  | RCLIEIFGILK            |
| 302 | gj 41152161  | Rho GTPase activating protein 12 [Danio rerio]              | 30.6 | 817   | 530.06  | 1058.11 | 1060.49 | 48.93 | 0.016  | SSNENLNQR              |
|     |              |                                                             |      |       | 530.07  | 1587.17 | 1586.76 | 44.57 | 0.035  | SSNENLNQRAPTEK         |
| 303 | gj 56790313  | homeo box B9a [Danio rerio]                                 | 27.1 | 255   | 709.86  | 1417.70 | 1416.74 | 49.99 | 0.01   | MEPLLGHLEPPK           |
| 304 | gj 55926092  | heat shock 10kD protein 1 (chaperonin 10) [Danio rerio]     | 50   | 100   | 771.64  | 1541.27 | 1539.86 | 49.56 | 0.011  | VLQATVVAVGPGSTNK       |
| 305 | gj 189527715 | PREDICTED: similar to dentin sialophosphoprotein [Dani      | 31.2 | 998   | 729.47  | 1456.93 | 1457.71 | 47.26 | 0.019  | SDNDPGSKINLGNK         |
| 306 | gj 125814831 | PREDICTED: similar to zinc finger protein 585B [Danio re    | 47.7 | 298   | 837.97  | 1673.92 | 1672.88 | 46.67 | 0.021  | EESEDVKIEEIIK          |
| 307 | gj 66472430  | hypothetical protein LOC553684 [Danio rerio]                | 42.6 | 324   | 477.16  | 952.30  | 952.52  | 49.28 | 0.011  | FMSKSVVR               |
| 308 | gj 18858981  | lamin b2 [Danio rerio]                                      | 34.6 | 583   | 624.69  | 1247.37 | 1245.61 | 48.79 | 0.015  | VELEESSTAGPK           |
| 309 | gj 38707985  | electron-transfer-flavoprotein, alpha polypeptide [Danio re | 57.1 | 333   | 714.44  | 1426.86 | 1424.81 | 52.98 | 0.005  | LDVAPISDIEIK           |
| 310 | gj 153791419 | si:ch73-252g14.4 [Danio rerio]                              | 28.2 | 386   | 829.77  | 2486.28 | 2486.30 | 48.59 | 0.0099 | VQQLLHAHTFGPQHNPTVHGLF |
| 311 | gj 148229906 | hypothetical protein LOC100037332 [Danio rerio]             | 45.4 | 302   | 551.01  | 1100.01 | 1098.64 | 48.48 | 0.017  | LKQELAEELR             |
| 312 | gj 148922926 | succinate dehydrogenase complex, subunit B, iron sulfur     | 68.2 | 280   | 634.14  | 1266.26 | 1264.60 | 48.26 | 0.015  | QQYLQSVEDR             |
| 313 | gj 189518965 | PREDICTED: similar to Acetyl-CoA carboxylase 2 (ACC-        | 35.4 | 2240  | 836.89  | 1671.76 | 1672.86 | 48.19 | 0.014  | ESRGGVLEAEGTVEIK       |
| 314 | gj 131888959 | hypothetical protein LOC100034538 [Danio rerio]             | 25.2 | 448   | 708.70  | 1415.39 | 1415.74 | 48.18 | 0.016  | EALGAENIQSTKR          |
| 315 | gj 41055754  | sarcolemma associated protein [Danio rerio]                 | 38.8 | 376   | 902.65  | 1803.28 | 1801.84 | 48.03 | 0.015  | LNQELQEANEQANSSK       |
| 316 | gj 50345068  | dehydrogenase/reductase (SDR family) member 1 [Danic        | 78.1 | 310   | 909.43  | 1816.84 | 1815.86 | 47.68 | 0.016  | YKDVFTNGETTELSGR       |
| 317 | gj 55742454  | signal transducer and activator of transcription 4 [Danio r | 44.5 | 667   | 635.80  | 1269.58 | 1268.77 | 47.68 | 0.017  | QLDKLGELILK            |
| 318 | gj 189533166 | PREDICTED: similar to G protein-coupled receptor 126 b      | 22   | 1236  | 581.81  | 1161.61 | 1161.64 | 47.63 | 0.019  | LTSTVAWGLSK            |
| 319 | gj 121583897 | hypothetical protein LOC562692 [Danio rerio]                | 22.1 | 384   | 816.69  | 1631.36 | 1631.81 | 47.64 | 0.018  | ELEEKVAMLEAENK         |
| 320 | gj 68357456  | PREDICTED: similar to mCG1046517 [Danio rerio]              | 38.3 | 1561  | 767.11  | 1532.20 | 1530.94 | 47.56 | 0.018  | LLEKSKELAFILK          |
| 321 | gj 51870938  | cortactin [Danio rerio]                                     | 50.4 | 504   | 843.14  | 1684.27 | 1683.84 | 47.32 | 0.018  | TVQGGSGHQEHINIK        |
| 322 | gj 50233897  | FLJ12716-like protein [Danio rerio]                         | 30.7 | 1132  | 595.17  | 1188.32 | 1187.63 | 46.86 | 0.025  | TAYSLVHELK             |
| 323 | gj 47086425  | cytochrome P450, family 17, subfamily A, polypeptide 1 [    | 43.5 | 519   | 531.43  | 1060.84 | 1061.51 | 46.84 | 0.025  | MNGFVPAGNR             |
| 324 | gj 168229182 | zgc:171912 [Danio rerio]                                    | 52.7 | 459   | 562.80  | 1123.58 | 1123.61 | 46.57 | 0.022  | IIEKNAGHSR             |
| 325 | gj 189530003 | PREDICTED: hypothetical protein [Danio rerio]               | 72.4 | 261   | 664.65  | 1327.28 | 1325.80 | 46.21 | 0.024  | CALLALRGLALR           |
| 326 | gj 115529393 | hypothetical protein LOC767787 [Danio rerio]                | 46.4 | 168   | 1304.73 | 1303.72 | 1303.63 | 46.05 | 0.026  | GIEFDAIAPDEK           |
| 327 | gj 189532603 | PREDICTED: im:7151086 [Danio rerio]                         | 24.2 | 15951 | 690.69  | 1379.37 | 1379.61 | 46.02 | 0.024  | ELEDQMMDLTR            |
| 328 | gj 123708080 | hypothetical protein LOC791153 [Danio rerio]                | 50   | 304   | 459.01  | 916.00  | 914.55  | 45.98 | 0.033  | IVATAKAGGK             |
| 329 | gj 189518402 | PREDICTED: similar to NLR family, CARD domain conta         | 48.8 | 995   | 952.59  | 951.58  | 951.47  | 45.61 | 0.025  | CFDDIVLK               |
| 330 | gj 189523575 | PREDICTED: similar to gag-pol polyprotein [Danio rerio]     | 58.8 | 1555  | 550.82  | 1099.63 | 1098.64 | 45.59 | 0.033  | LELAAAVVSAR            |
| 331 | gj 18858907  | islet2 [Danio rerio]                                        | 51.8 | 359   | 656.53  | 1966.55 | 1963.95 | 45.44 | 0.024  | VDILPHPSFLGDMGDHSK     |
| 332 | gj 189520388 | PREDICTED: similar to helitron 4 helitron-like transpos     | 30.3 | 2363  | 799.26  | 1596.50 | 1595.81 | 45.40 | 0.028  | QNNYNLFKSNLTK          |
| 333 | gj 57525891  | hypothetical protein LOC445162 [Danio rerio]                | 36.3 | 306   | 799.26  | 1596.50 | 1593.85 | 45.32 | 0.028  | NKMLSAAFKSAAVEK        |
| 334 | gj 189529618 | PREDICTED: similar to Glutamate [NMDA] receptor subu        | 27.5 | 1924  | 418.31  | 417.30  | 418.22  | 37.37 | 0.0013 | AGGSK                  |
| 335 | gj 122114635 | hypothetical protein LOC613021 [Danio rerio]                | 52.3 | 1176  | 418.31  | 417.30  | 418.22  | 37.37 | 0.0013 | AGGSK                  |
| 336 | gj 189516062 | PREDICTED: similar to cadherin-like 24 [Danio rerio]        | 32.3 | 725   | 577.37  | 1152.73 | 1152.52 | 45.16 | 0.031  | EMSVDSRSSR             |
| 337 | gj 189523771 | PREDICTED: wu:fa11e05 [Danio rerio]                         | 25.5 | 715   | 664.43  | 1990.27 | 1988.96 | 45.09 | 0.026  | HHTILSDMASVPNFQHR      |
| 338 | gj 189514468 | PREDICTED: similar to tropomodulin [Danio rerio]            | 42.4 | 356   | 844.25  | 1686.48 | 1684.83 | 45.05 | 0.031  | SNDPDLTEVNLNNIK        |
| 339 | gj 189529885 | PREDICTED: similar to Si:dkey-204a24.2 protein [Danio       | 39.4 | 1182  | 607.51  | 1213.01 | 1212.65 | 44.95 | 0.035  | LLQAQLDEQR             |
| 340 | gj 41152024  | glycoprotein, synaptic 2 [Danio rerio]                      | 27.3 | 308   | 608.63  | 1215.25 | 1215.61 | 44.90 | 0.038  | HYEVEILDAK             |
| 341 | gj 189537716 | PREDICTED: similar to kinesin family member 21A, parti      | 39.2 | 1581  | 410.34  | 818.67  | 818.47  | 44.82 | 0.043  | KLSVMNK                |
| 342 | gj 164414411 | hypothetical protein LOC561896 [Danio rerio]                | 37.8 | 423   | 719.94  | 1437.87 | 1439.78 | 44.47 | 0.034  | ENLQVVRSRDPK           |
| 343 | gj 189536525 | PREDICTED: similar to carbohydrate (N-acetylglucosami       | 24.6 | 423   | 719.94  | 1437.87 | 1439.78 | 44.47 | 0.034  |                        |
| 344 | gj 189529867 | PREDICTED: similar to transforming growth factor beta r     | 33   | 2317  | 635.80  | 1269.58 | 1268.77 | 44.44 | 0.037  | IIQLSETKPLK            |
| 345 | gj 189517917 | PREDICTED: similar to family with sequence similarity 4C    | 42.1 | 789   | 589.15  | 1176.28 | 1177.49 | 44.15 | 0.044  | VEMESDSPER             |
| 346 | gj 189515647 | PREDICTED: similar to Choline transporter-like protein 5    | 37   | 737   | 478.48  | 954.95  | 952.49  | 44.15 | 0.04   | FLLCCLK                |
| 347 | gj 189522362 | PREDICTED: similar to Choline transporter-like protein 5    | 41.5 | 730   | 478.48  | 954.95  | 952.49  | 44.15 | 0.04   |                        |

|     |              |                                                             |      |      |         |         |         |       |       |                         |
|-----|--------------|-------------------------------------------------------------|------|------|---------|---------|---------|-------|-------|-------------------------|
| 348 | gi 189533245 | PREDICTED: ryanodine receptor 3 [Danio rerio]               | 38.1 | 4863 | 701.10  | 1400.18 | 1398.71 | 44.00 | 0.041 | GRPQKTEEEPTK            |
| 349 | gi 66773104  | branched chain keto acid dehydrogenase E1, alpha poly       | 25.3 | 446  | 827.53  | 1653.04 | 1652.84 | 43.92 | 0.038 | QGQIINPSEDPQLSK         |
| 350 | gi 189519010 | PREDICTED: similar to dynein, axonemal, heavy chain 1       | 39.1 | 4616 | 558.63  | 1115.25 | 1114.58 | 45.21 | 0.036 | VWQADVLER               |
| 351 | gi 45387519  | short chain dehydrogenase/reductase [Danio rerio]           | 45.6 | 320  | 529.67  | 1585.97 | 1586.92 | 43.87 | 0.041 | VITVSSGGMLVQKLR         |
| 352 | gi 160333235 | lyric-like [Danio rerio]                                    | 72.1 | 542  | 1176.76 | 2351.51 | 2350.20 | 43.69 | 0.032 | KRPEEEGSAVEVIPEVSAPA EK |
| 353 | gi 68399071  | PREDICTED: similar to rCG63619 [Danio rerio]                | 37.5 | 104  | 530.07  | 1587.17 | 1586.77 | 43.63 | 0.043 | KES AQMPGDVQELR         |
| 354 | gi 125848595 | PREDICTED: similar to procollagen I N-proteinase [Danic     | 45   | 1270 | 1059.42 | 2116.82 | 2114.97 | 43.57 | 0.037 | CGVCGGDNSTCKIVKGNFTR    |
| 355 | gi 57770377  | homeo box HB9 like a [Danio rerio]                          | 57.6 | 309  | 599.59  | 1197.16 | 1196.70 | 43.36 | 0.048 | RSINVGVS LPR            |
| 356 | gi 189519045 | PREDICTED: similar to Armadillo repeat protein deleted i    | 36.4 | 986  | 866.31  | 1730.60 | 1729.84 | 43.34 | 0.045 | FQDPSALQAPGSAGTQR       |
| 357 | gi 68399197  | PREDICTED: cathepsin K, like [Danio rerio]                  | 18.1 | 349  | 605.86  | 1209.71 | 1209.58 | 43.27 | 0.048 | NLAMAGISDYR             |
| 358 | gi 50344729  | annexin A6 [Danio rerio]                                    | 46.7 | 492  | 565.88  | 1129.74 | 1129.63 | 43.17 | 0.057 | EAILDLITSR              |
| 359 | gi 18858253  | adenosine deaminase, RNA-specific [Danio rerio]             | 41.8 | 1382 | 539.50  | 1076.99 | 1076.55 | 43.08 | 0.056 | LFQEASAPSK              |
| 360 | gi 47086899  | par-6 partitioning defective 6-like protein gamma [Danio r  | 11.1 | 434  | 442.43  | 882.85  | 882.51  | 42.80 | 0.049 | LIMTIHR                 |
| 361 | gi 55742346  | receptor interacting protein kinase 5 [Danio rerio]         | 44.6 | 857  | 1217.37 | 3649.08 | 3647.74 | 42.72 | 0.025 | VSDGGGGGALFTQLASLQLISA  |
| 362 | gi 189525434 | PREDICTED: im:7157373 [Danio rerio]                         | 51.2 | 545  | 954.04  | 2859.08 | 2859.32 | 42.64 | 0.035 | SAAAPPKEEAPPANAPDGDAPA  |
| 363 | gi 189524989 | PREDICTED: neurobeachin-like 2 [Danio rerio]                | 38.9 | 1495 | 741.60  | 1481.19 | 1480.68 | 42.56 | 0.053 | NEQEVVSDDRYK            |
| 364 | gi 41393105  | plasminogen [Danio rerio]                                   | 51.5 | 818  | 825.87  | 1649.73 | 1649.83 | 42.31 | 0.059 | WEGTFPHVPNITPR          |
| 365 | gi 125852544 | PREDICTED: hypothetical protein [Danio rerio]               | 24.1 | 174  | 669.26  | 2004.76 | 2002.97 | 42.20 | 0.05  | DGFIDKEDLHDMLASLGK      |
| 366 | gi 47550703  | myosin, light polypeptide 9, like [Danio rerio]             | 37.8 | 172  | 669.26  | 2004.76 | 2002.97 | 42.20 | 0.05  |                         |
| 367 | gi 189523637 | PREDICTED: hypothetical protein [Danio rerio]               | 16.6 | 650  | 548.40  | 1642.16 | 1644.80 | 41.90 | 0.062 | GCPNGHLASVTSSFIR        |
| 368 | gi 125852977 | PREDICTED: similar to Zinc finger protein 776 [Danio rer    | 50.1 | 499  | 617.69  | 1850.04 | 1850.86 | 41.48 | 0.063 | CPRSL SVCQTCNGKMPK      |
| 369 | gi 54400554  | cysteine and glycine-rich protein 3 (cardiac LIM protein) [ | 75.6 | 193  | 818.62  | 2452.82 | 2452.15 | 42.68 | 0.04  | SLESTTVTDKDGELYCKVCYAK  |

### DMSO replicate 3

| Protein # | Accession ID | Protein name                                      | Protein coverage | length | peptide m/z | peptide M <sub>rexp</sub> t | peptide M <sub>r</sub> calc | peptide score | pep_expect | peptide sequence         |
|-----------|--------------|---------------------------------------------------|------------------|--------|-------------|-----------------------------|-----------------------------|---------------|------------|--------------------------|
| 1         | gi 74315904  | alpha globin-like [Danio rerio]                   | 76.2             | 143    | 559.16      | 1116.30                     | 1114.56                     | 62.82         | 0.00064    | ADEIGAEALAR              |
|           |              |                                                   |                  |        | 588.80      | 1175.58                     | 1175.62                     | 75.69         | 3.10E-05   | TIMGAVGEAISK             |
|           |              |                                                   |                  |        | 684.20      | 1366.38                     | 1365.73                     | 83.43         | 4.30E-06   | FFNNLALALSEK             |
|           |              |                                                   |                  |        | 932.40      | 1862.78                     | 1863.88                     | 123.63        | 3.90E-10   | TYFSHWSDLSPGSGPVK        |
|           |              |                                                   |                  |        | 934.07      | 1866.12                     | 1868.00                     | 127.17        | 1.70E-10   | IDDLVGGLAALSELHAFK       |
|           |              |                                                   |                  |        | 934.16      | 1866.31                     | 1863.88                     | 71.94         | 5.80E-05   | TYFSHWSDLSPGSGPVK        |
|           |              |                                                   |                  |        | 934.21      | 1866.40                     | 1868.00                     | 95.14         | 2.80E-07   | IDDLVGGLAALSELHAFK       |
|           |              |                                                   |                  |        | 934.24      | 1866.46                     | 1863.88                     | 89.80         | 9.50E-07   | TYFSHWSDLSPGSGPVK        |
|           |              |                                                   |                  |        | 934.40      | 1866.79                     | 1868.00                     | 128.55        | 1.30E-10   | IDDLVGGLAALSELHAFK       |
|           |              |                                                   |                  |        | 996.15      | 1990.29                     | 1991.97                     | 89.92         | 8.60E-07   | TYFSHWSDLSPGSGPVKK       |
| 2         | gi 47271417  | hemoglobin alpha adult-1 [Danio rerio]            | 75.5             | 143    | 1009.90     | 3026.67                     | 3025.62                     | 60.45         | 0.00053    | TIMGAVGEAISKIDDLVGGLAALS |
|           |              |                                                   |                  |        | 559.16      | 1116.30                     | 1114.56                     | 62.82         | 0.00064    | ADEIGAEALAR              |
|           |              |                                                   |                  |        | 582.03      | 1162.04                     | 1161.61                     | 84.54         | 3.80E-06   | TIMGAVGEAVSK             |
|           |              |                                                   |                  |        | 684.20      | 1366.38                     | 1365.73                     | 83.43         | 4.30E-06   | FFNNLALALSEK             |
|           |              |                                                   |                  |        | 924.44      | 1846.87                     | 1847.88                     | 123.87        | 3.70E-10   | TYFSHWADLSPGSGPVK        |
|           |              |                                                   |                  |        | 934.40      | 1866.79                     | 1868.00                     | 128.55        | 1.30E-10   | IDDLVGGLAALSELHAFK       |
|           |              |                                                   |                  |        | 660.43      | 1978.26                     | 1975.98                     | 65.55         | 0.00024    | TYFSHWADLSPGSGPVKK       |
| 3         | gi 163644263 | ventricular myosin heavy chain-like [Danio rerio] | 59.4             | 1936   | 918.52      | 917.51                      | 917.48                      | 44.02         | 0.053      | VTVETQGGK                |
|           |              |                                                   |                  |        | 496.07      | 990.13                      | 989.50                      | 55.65         | 0.0033     | SNNFQKPR                 |
|           |              |                                                   |                  |        | 538.17      | 1074.32                     | 1073.54                     | 42.91         | 0.063      | ADIAESQV NK              |
|           |              |                                                   |                  |        | 554.06      | 1106.11                     | 1104.58                     | 44.72         | 0.036      | SNTAAASLDKK              |
|           |              |                                                   |                  |        | 1182.68     | 1181.67                     | 1179.58                     | 42.70         | 0.053      | D FEISQLNSK              |
|           |              |                                                   |                  |        | 1208.62     | 1207.61                     | 1207.55                     | 55.68         | 0.0028     | LQAENDEF SR              |
|           |              |                                                   |                  |        | 609.71      | 1217.41                     | 1215.63                     | 70.03         | 0.00011    | AGLLGQLEEMR              |
|           |              |                                                   |                  |        | 612.98      | 1223.95                     | 1223.61                     | 40.18         | 0.093      | TKYETDAIQR               |
| 619.88    | 1237.74      | 1237.63                                           | 49.48            | 0.011  | EADVLQQNPPK |                             |                             |               |            |                          |



|   |             |                                                         |     |         |         |         |         |          |                    |                         |
|---|-------------|---------------------------------------------------------|-----|---------|---------|---------|---------|----------|--------------------|-------------------------|
|   |             |                                                         |     | 623.38  | 1244.75 | 1244.65 | 82.73   | 6.20E-06 | DIDDLELTLAK        |                         |
|   |             |                                                         |     | 646.59  | 1291.16 | 1288.63 | 51.30   | 0.008    | DSQLQLDDSLR        |                         |
|   |             |                                                         |     | 650.14  | 1298.26 | 1297.56 | 53.69   | 0.0043   | TLEDQMNEYR         |                         |
|   |             |                                                         |     | 654.56  | 1307.11 | 1307.64 | 84.62   | 3.50E-06 | NSFSQQLEDLK        |                         |
|   |             |                                                         |     | 661.87  | 1321.73 | 1320.66 | 42.87   | 0.05     | KLEDECSELKK        |                         |
|   |             |                                                         |     | 1368.64 | 1367.63 | 1367.63 | 66.26   | 0.00023  | LQHELDEAEER        |                         |
|   |             |                                                         |     | 687.67  | 1373.32 | 1372.74 | 51.55   | 0.0072   | KDIDDLELTLAK       |                         |
|   |             |                                                         |     | 699.61  | 1397.21 | 1397.75 | 78.26   | 1.40E-05 | NALLQAELEELR       |                         |
|   |             |                                                         |     | 708.42  | 1414.83 | 1414.73 | 99.72   | 1.10E-07 | LAEQELLDVTER       |                         |
|   |             |                                                         |     | 733.10  | 1464.19 | 1463.68 | 59.68   | 0.0011   | LSEKDEEMEQVK       |                         |
|   |             |                                                         |     | 738.40  | 1474.78 | 1473.68 | 90.43   | 9.10E-07 | VEELEEELEAER       |                         |
|   |             |                                                         |     | 748.76  | 1495.50 | 1495.73 | 54.59   | 0.0032   | KLQHELDEAEER       |                         |
|   |             |                                                         |     | 751.66  | 1501.31 | 1499.75 | 102.78  | 5.30E-08 | LQEAEAVEAVNAK      |                         |
|   |             |                                                         |     | 752.63  | 1503.25 | 1502.76 | 89.35   | 1.20E-06 | ENQSILITGESGAGK    |                         |
|   |             |                                                         |     | 754.50  | 1506.99 | 1506.60 | 38.10   | 0.15     | EEQAEADGTEDADK     |                         |
|   |             |                                                         |     | 761.65  | 1521.28 | 1520.76 | 81.03   | 7.70E-06 | AITDAAMMAEELKK     |                         |
|   |             |                                                         |     | 770.71  | 1539.41 | 1539.77 | 76.29   | 2.20E-05 | DYHIFYQILSNK       |                         |
|   |             |                                                         |     | 771.84  | 1541.67 | 1541.83 | 91.51   | 6.90E-07 | IDDEQSIIIQLQK      |                         |
|   |             |                                                         |     | 771.84  | 1541.67 | 1539.77 | 45.03   | 0.031    | DYHIFYQILSNK       |                         |
|   |             |                                                         |     | 771.90  | 1541.78 | 1542.83 | 96.87   | 2.00E-07 | KLAEQELLDVTER      |                         |
|   |             |                                                         |     | 772.38  | 1542.74 | 1541.83 | 64.33   | 0.00036  | IDDEQSIIIQLQK      |                         |
|   |             |                                                         |     | 1543.94 | 1542.93 | 1542.83 | 92.72   | 5.40E-07 | KLAEQELLDVTER      |                         |
|   |             |                                                         |     | 772.73  | 1543.45 | 1541.83 | 60.07   | 0.00099  | IDDEQSIIIQLQK      |                         |
|   |             |                                                         |     | 773.15  | 1544.28 | 1542.83 | 81.30   | 7.50E-06 | KLAEQELLDVTER      |                         |
|   |             |                                                         |     | 802.72  | 1603.43 | 1602.78 | 73.98   | 4.00E-05 | SNDDLKENTAIVER     |                         |
|   |             |                                                         |     | 806.68  | 1611.34 | 1610.75 | 79.68   | 1.00E-05 | AAEESSEEQANVHLGK   |                         |
|   |             |                                                         |     | 810.76  | 1619.50 | 1619.78 | 68.97   | 0.00012  | LSEKDEEMEQVKR      |                         |
|   |             |                                                         |     | 817.80  | 1633.58 | 1631.78 | 111.28  | 7.50E-09 | LEEAGGATAAQIEMNK   |                         |
|   |             |                                                         |     | 823.93  | 1645.84 | 1645.82 | 111.90  | 6.50E-09 | NLTEEMAALDDIIAK    |                         |
|   |             |                                                         |     | 844.34  | 1686.67 | 1684.83 | 55.53   | 0.0028   | LELDDVASSMEHIVK    |                         |
|   |             |                                                         |     | 845.48  | 1688.95 | 1688.88 | 92.61   | 5.60E-07 | GQNVQQVNYAIGALSK   |                         |
|   |             |                                                         |     | 852.23  | 1702.45 | 1701.82 | 98.48   | 1.30E-07 | LQNEIEDLMVDVER     |                         |
|   |             |                                                         |     | 859.76  | 1717.51 | 1717.85 | 103.10  | 4.80E-08 | NEDPLNETVVGLYQK    |                         |
|   |             |                                                         |     | 862.60  | 1723.19 | 1721.94 | 82.68   | 5.20E-06 | VQLLHSQNTSLINQK    |                         |
|   |             |                                                         |     | 893.74  | 1785.47 | 1786.87 | 131.68  | 6.40E-11 | TIDTLQSALESETHSR   |                         |
|   |             |                                                         |     | 896.44  | 1790.86 | 1790.76 | 78.77   | 1.30E-05 | QREEQAEADGTEDADK   |                         |
|   |             |                                                         |     | 931.71  | 1861.40 | 1858.88 | 102.14  | 5.50E-08 | LEQQVDDLEGSLEQEK   |                         |
|   |             |                                                         |     | 934.68  | 1867.34 | 1867.93 | 113.91  | 3.70E-09 | DLEEATLQHEATAATLR  |                         |
|   |             |                                                         |     | 942.98  | 1883.95 | 1884.92 | 100.93  | 7.00E-08 | QADSVaelGEQIDNLQR  |                         |
|   |             |                                                         |     | 981.26  | 1960.50 | 1957.98 | 104.58  | 3.00E-08 | ILQEEISDLTEQLGEGGK |                         |
|   |             |                                                         |     | 989.22  | 1976.43 | 1976.89 | 60.09   | 0.00083  | MEGDLNEMEIQLSQANR  |                         |
| 4 | gj 41053652 | myoglobin [Danio rerio]                                 | 100 | 147     | 550.57  | 1099.12 | 1098.58 | 99.70    | 1.20E-07           | AGLDAAGQGALR            |
|   |             |                                                         |     |         | 779.82  | 1557.62 | 1557.74 | 87.48    | 1.80E-06           | VMDAVIGDIDGYK           |
|   |             |                                                         |     |         | 1010.16 | 2018.30 | 2020.10 | 87.97    | 1.40E-06           | GDHAALLKPLANTHANIHK     |
|   |             |                                                         |     |         | 1110.11 | 2218.21 | 2219.23 | 109.00   | 1.00E-08           | AKGDHAALLKPLANTHANIHK   |
|   |             |                                                         |     |         | 1127.78 | 2253.55 | 2253.18 | 110.97   | 6.50E-09           | FSGISQDLAGSPAVAAHGATV   |
|   |             |                                                         |     |         | 1192.16 | 2382.31 | 2381.27 | 90.70    | 6.30E-07           | FSGISQDLAGSPAVAAHGATV   |
|   |             |                                                         |     |         | 946.44  | 2836.30 | 2834.54 | 54.67    | 0.0022             | GDHAALLKPLANTHANIHKVALN |
| 5 | gj 38488753 | myosin, heavy polypeptide 6, cardiac muscle, alpha [Dan | 52  | 1936    | 494.37  | 986.73  | 986.54  | 50.96    | 0.0099             | ENITLLER                |
|   |             |                                                         |     |         | 502.45  | 1002.89 | 1002.56 | 48.51    | 0.018              | TNIFQKPR                |
|   |             |                                                         |     |         | 538.17  | 1074.32 | 1073.54 | 42.91    | 0.063              | ADIAESQVNK              |
|   |             |                                                         |     |         | 1203.58 | 1202.57 | 1202.57 | 53.53    | 0.005              | DGDVHPQNPPK             |

|   |              |                                                        |      |         |         |         |         |          |                        |                          |
|---|--------------|--------------------------------------------------------|------|---------|---------|---------|---------|----------|------------------------|--------------------------|
|   |              |                                                        |      | 623.38  | 1244.75 | 1244.65 | 82.73   | 6.20E-06 | DIDDLELTLAK            |                          |
|   |              |                                                        |      | 660.22  | 1318.42 | 1316.61 | 57.05   | 0.0021   | ELENELDAEQK            |                          |
|   |              |                                                        |      | 661.87  | 1321.73 | 1320.66 | 42.87   | 0.05     | KLEDECSELKK            |                          |
|   |              |                                                        |      | 672.56  | 1343.10 | 1341.65 | 93.60   | 4.50E-07 | AFDVLGFTSEEK           |                          |
|   |              |                                                        |      | 687.67  | 1373.32 | 1372.74 | 51.55   | 0.0072   | KDIDDLELTLAK           |                          |
|   |              |                                                        |      | 1375.67 | 1374.66 | 1374.66 | 54.13   | 0.004    | LAEQELTDATER           |                          |
|   |              |                                                        |      | 1382.63 | 1381.62 | 1381.65 | 62.31   | 0.00057  | LQHELEEEAER            |                          |
|   |              |                                                        |      | 737.89  | 1473.76 | 1473.68 | 57.30   | 0.0019   | IEELEEELDAER           |                          |
|   |              |                                                        |      | 741.38  | 1480.74 | 1480.77 | 83.35   | 4.40E-06 | LSSADIETYLLEK          |                          |
|   |              |                                                        |      | 743.81  | 1485.60 | 1485.73 | 96.91   | 2.00E-07 | LQDAEEAVEAVNAK         |                          |
|   |              |                                                        |      | 745.59  | 1489.17 | 1488.74 | 49.21   | 0.012    | ENQSVLITGESGAGK        |                          |
|   |              |                                                        |      | 752.72  | 1503.42 | 1502.76 | 81.10   | 7.90E-06 | KLAEQELTDATER          |                          |
|   |              |                                                        |      | 757.12  | 1512.23 | 1509.74 | 64.70   | 0.00032  | KLQHELEEEAER           |                          |
|   |              |                                                        |      | 760.38  | 1518.75 | 1517.74 | 68.41   | 0.00015  | IEDEQMASVQLQK          |                          |
|   |              |                                                        |      | 761.65  | 1521.28 | 1520.76 | 81.03   | 7.70E-06 | AITDAAMMAEELKK         |                          |
|   |              |                                                        |      | 774.60  | 1547.19 | 1546.71 | 99.75   | 1.10E-07 | SAEEAEELANANTAK        |                          |
|   |              |                                                        |      | 775.73  | 1549.44 | 1547.71 | 74.44   | 3.60E-05 | LTQENVMDLENDK          |                          |
|   |              |                                                        |      | 796.14  | 1590.26 | 1588.75 | 92.29   | 5.80E-07 | IEDEEEINADLTAK         |                          |
|   |              |                                                        |      | 809.57  | 1617.12 | 1615.81 | 113.60  | 4.30E-09 | LEEAGGATSAQVELNK       |                          |
|   |              |                                                        |      | 823.31  | 1644.61 | 1644.83 | 36.65   | 0.21     | RNNLMQTELEELR          |                          |
|   |              |                                                        |      | 846.53  | 1691.04 | 1690.81 | 65.90   | 0.00026  | NSYEETLDHLETIK         |                          |
|   |              |                                                        |      | 849.50  | 1696.99 | 1697.86 | 118.55  | 1.30E-09 | GQSVDQVYYSIGALAK       |                          |
|   |              |                                                        |      | 859.76  | 1717.51 | 1716.90 | 83.45   | 4.40E-06 | NKDPLNETVVGLYQK        |                          |
|   |              |                                                        |      | 865.98  | 1729.95 | 1729.86 | 86.09   | 2.40E-06 | LQNEIEDLMLDLER         |                          |
|   |              |                                                        |      | 931.71  | 1861.40 | 1858.88 | 102.14  | 5.50E-08 | LEQQVDDLEGSLEQEK       |                          |
|   |              |                                                        |      | 948.63  | 1895.24 | 1893.92 | 99.40   | 9.90E-08 | HADSVaelGEQIDNLQR      |                          |
|   |              |                                                        |      | 950.98  | 1899.94 | 1899.92 | 113.63  | 3.80E-09 | DLEESTLQHEATTASLR      |                          |
|   |              |                                                        |      | 966.99  | 1931.97 | 1931.91 | 121.29  | 6.40E-10 | NLQEEISDLTDQVSEGR      |                          |
|   |              |                                                        |      | 989.22  | 1976.43 | 1976.89 | 60.09   | 0.00083  | MEGDLNEMEIQLSQANR      |                          |
|   |              |                                                        |      | 994.44  | 1986.87 | 1986.97 | 82.62   | 4.70E-06 | LEQQVDDLEGSLEQEKK      |                          |
|   |              |                                                        |      | 686.73  | 2057.16 | 2056.02 | 50.86   | 0.0068   | RDLEESTLQHEATTASLR     |                          |
|   |              |                                                        |      | 1044.14 | 2086.27 | 2086.04 | 94.86   | 2.70E-07 | VKLEQQVDDLEGSLEQEK     |                          |
|   |              |                                                        |      | 1087.63 | 2173.25 | 2170.99 | 47.59   | 0.014    | TELQSALEEADASVEHEEGK   |                          |
|   |              |                                                        |      | 1099.84 | 2197.66 | 2199.12 | 116.43  | 1.90E-09 | GTLEDQIIQANPALEAFGNAK  |                          |
|   |              |                                                        |      | 739.60  | 2215.76 | 2214.14 | 72.91   | 4.10E-05 | VKLEQQVDDLEGSLEQEKK    |                          |
|   |              |                                                        |      | 1158.56 | 2315.10 | 2316.11 | 61.10   | 0.00062  | NDLLLQVQSEQDTLTDAEER   |                          |
|   |              |                                                        |      | 1183.60 | 2365.19 | 2366.12 | 87.76   | 1.30E-06 | LQQFFNHMHFVLEQEEYK     |                          |
|   |              |                                                        |      | 1214.26 | 2426.50 | 2426.19 | 36.45   | 0.17     | QESDLLQLQNELEELVQENR   |                          |
|   |              |                                                        |      | 1278.27 | 2554.53 | 2554.29 | 59.63   | 0.00076  | KQESDLLQLQNELEELVQENR  |                          |
|   |              |                                                        |      | 1341.92 | 2681.83 | 2682.38 | 99.52   | 7.50E-08 | KKQESDLLQLQNELEELVQENR |                          |
| 6 | gj 169403947 | glyceraldehyde-3-phosphate dehydrogenase [Danio rerio] | 67   | 333     | 1385.73 | 1384.72 | 1384.73 | 62.36    | 0.0006                 | GASQNIIPASTGAAK          |
|   |              |                                                        |      |         | 787.81  | 1573.60 | 1571.83 | 72.23    | 6.20E-05               | LVIDGHAITVYSER           |
|   |              |                                                        |      |         | 882.67  | 1763.32 | 1762.80 | 80.71    | 8.30E-06               | LVTWYDNEFGYSNR           |
|   |              |                                                        |      |         | 931.72  | 1861.42 | 1860.94 | 86.98    | 1.80E-06               | SSIFDAGAGIALNDHFVK       |
|   |              |                                                        |      |         | 1106.31 | 2210.60 | 2210.17 | 52.13    | 0.0049                 | LVIDGHAITVYSERDPANIK     |
|   |              |                                                        |      |         | 1116.33 | 2230.64 | 2230.08 | 140.10   | 7.90E-12               | WGDAGATYVVESTGVFTTIEK    |
|   |              |                                                        |      |         | 1301.52 | 2601.03 | 2599.37 | 84.74    | 2.40E-06               | VINDNFVIVEGLMSTVHAITATQK |
| 7 | gj 163644331 | ventricular myosin heavy chain [Danio rerio]           | 46.1 | 1938    | 496.07  | 990.13  | 989.50  | 55.65    | 0.0033                 | SNNFQKPR                 |
|   |              |                                                        |      |         | 538.17  | 1074.32 | 1073.54 | 42.91    | 0.063                  | ADIAESQVNK               |
|   |              |                                                        |      |         | 609.71  | 1217.41 | 1215.63 | 70.03    | 0.00011                | AGLLGQLEEMR              |
|   |              |                                                        |      |         | 612.98  | 1223.95 | 1223.61 | 40.18    | 0.093                  | TKYETDAIQR               |
|   |              |                                                        |      |         | 623.38  | 1244.75 | 1244.65 | 82.73    | 6.20E-06               | DIDDLELTLAK              |

|    |              |                                                         |      |         |         |         |         |          |                       |                       |
|----|--------------|---------------------------------------------------------|------|---------|---------|---------|---------|----------|-----------------------|-----------------------|
|    |              |                                                         |      | 661.87  | 1321.73 | 1320.66 | 42.87   | 0.05     | KLEDECSELKK           |                       |
|    |              |                                                         |      | 1368.64 | 1367.63 | 1367.63 | 66.26   | 0.00023  | IQHELDEAEER           |                       |
|    |              |                                                         |      | 687.67  | 1373.32 | 1372.74 | 51.55   | 0.0072   | KDIDDLELTLAK          |                       |
|    |              |                                                         |      | 748.76  | 1495.50 | 1495.73 | 54.59   | 0.0032   | KIQHELDEAEER          |                       |
|    |              |                                                         |      | 752.63  | 1503.25 | 1502.76 | 89.35   | 1.20E-06 | ENQSILITGESGAGK       |                       |
|    |              |                                                         |      | 761.65  | 1521.28 | 1520.76 | 81.03   | 7.70E-06 | AITDAAMMAEELKK        |                       |
|    |              |                                                         |      | 817.80  | 1633.58 | 1631.78 | 111.28  | 7.50E-09 | LEEAGGATAAQIEMNK      |                       |
|    |              |                                                         |      | 823.93  | 1645.84 | 1645.82 | 111.90  | 6.50E-09 | NLTEEMAALDDIIAK       |                       |
|    |              |                                                         |      | 862.60  | 1723.19 | 1721.94 | 82.68   | 5.20E-06 | VQLLHSQNTSLLNQK       |                       |
|    |              |                                                         |      | 931.71  | 1861.40 | 1858.88 | 102.14  | 5.50E-08 | LEQQVDDLEGSLEQEK      |                       |
|    |              |                                                         |      | 934.68  | 1867.34 | 1867.93 | 113.91  | 3.70E-09 | DLEEATLQHEATAATLR     |                       |
|    |              |                                                         |      | 942.98  | 1883.95 | 1884.92 | 100.93  | 7.00E-08 | QADSVaelGEQIDNLQR     |                       |
|    |              |                                                         |      | 1959.10 | 1958.09 | 1958.94 | 81.61   | 6.10E-06 | NLQEEISDLTEQLGEGGK    |                       |
|    |              |                                                         |      | 989.22  | 1976.43 | 1976.89 | 60.09   | 0.00083  | MEGDLNEMEIQLSQANR     |                       |
|    |              |                                                         |      | 994.44  | 1986.87 | 1986.97 | 82.62   | 4.70E-06 | LEQQVDDLEGSLEQEKK     |                       |
|    |              |                                                         |      | 1099.84 | 2197.66 | 2199.12 | 116.43  | 1.90E-09 | GTLEDQIIQANPALEAFGNAK |                       |
|    |              |                                                         |      | 1183.60 | 2365.19 | 2366.12 | 87.76   | 1.30E-06 | LQFFNHMHFVLEQEEYK     |                       |
| 8  | gj 18858329  | ba1 globin [Danio rerio]                                | 71.6 | 148     | 480.10  | 958.19  | 957.56  | 43.70    | 0.054                 | TAILGLWGK             |
|    |              |                                                         |      |         | 713.32  | 1424.63 | 1424.76 | 73.16    | 4.70E-05              | LNIDEIGPQALSR         |
|    |              |                                                         |      |         | 726.09  | 1450.16 | 1449.69 | 79.72    | 1.00E-05              | NTYAALSVMHSEK         |
|    |              |                                                         |      |         | 898.71  | 1795.40 | 1794.83 | 122.27   | 5.50E-10              | FGQAGFNADVQEAWQK      |
|    |              |                                                         |      |         | 993.19  | 1984.36 | 1984.97 | 87.75    | 1.50E-06              | YFATFGNLSSPAAIMGNPK   |
| 9  | gj 66472252  | slow myosin heavy chain 1 [Danio rerio]                 | 49.7 | 1938    | 538.17  | 1074.32 | 1073.54 | 42.91    | 0.063                 | ADIAESQVNK            |
|    |              |                                                         |      |         | 1182.68 | 1181.67 | 1179.58 | 42.70    | 0.053                 | DFEISQLNSK            |
|    |              |                                                         |      |         | 612.98  | 1223.95 | 1223.61 | 40.18    | 0.093                 | TKYETDAIQR            |
|    |              |                                                         |      |         | 623.38  | 1244.75 | 1244.65 | 82.73    | 6.20E-06              | DIDDLELTLAK           |
|    |              |                                                         |      |         | 661.87  | 1321.73 | 1320.66 | 42.87    | 0.05                  | KLEDECSELKK           |
|    |              |                                                         |      |         | 1368.64 | 1367.63 | 1367.63 | 66.26    | 0.00023               | LQHELDEAEER           |
|    |              |                                                         |      |         | 687.67  | 1373.32 | 1372.74 | 51.55    | 0.0072                | KDIDDLELTLAK          |
|    |              |                                                         |      |         | 745.59  | 1489.17 | 1488.74 | 49.21    | 0.012                 | ENQSVLITGESGAGK       |
|    |              |                                                         |      |         | 748.76  | 1495.50 | 1495.73 | 54.59    | 0.0032                | KLQHELDEAEER          |
|    |              |                                                         |      |         | 751.66  | 1501.31 | 1499.75 | 102.78   | 5.30E-08              | LQEAEEAVEAVNAK        |
|    |              |                                                         |      |         | 754.50  | 1506.99 | 1506.60 | 38.10    | 0.15                  | EEQAEADGTEDADK        |
|    |              |                                                         |      |         | 761.65  | 1521.28 | 1520.76 | 81.03    | 7.70E-06              | AITDAAMMAEELKK        |
|    |              |                                                         |      |         | 796.88  | 1591.74 | 1591.75 | 40.27    | 0.091                 | LSEKDEEMEQAKR         |
|    |              |                                                         |      |         | 817.80  | 1633.58 | 1631.78 | 111.28   | 7.50E-09              | LEEAGGATAAQIEMNK      |
|    |              |                                                         |      |         | 852.23  | 1702.45 | 1701.82 | 98.48    | 1.30E-07              | LQNEIEDLMVDVER        |
|    |              |                                                         |      |         | 896.44  | 1790.86 | 1790.76 | 78.77    | 1.30E-05              | QREEQAEADGTEDADK      |
|    |              |                                                         |      |         | 931.71  | 1861.40 | 1858.88 | 102.14   | 5.50E-08              | LEQQVDDLEGSLEQEK      |
|    |              |                                                         |      |         | 934.68  | 1867.34 | 1867.93 | 113.91   | 3.70E-09              | DLEEATLQHEATAATLR     |
|    |              |                                                         |      |         | 989.22  | 1976.43 | 1976.89 | 60.09    | 0.00083               | MEGDLNEMEIQLSQANR     |
|    |              |                                                         |      |         | 994.44  | 1986.87 | 1986.97 | 82.62    | 4.70E-06              | LEQQVDDLEGSLEQEKK     |
|    |              |                                                         |      |         | 1099.84 | 2197.66 | 2199.12 | 116.43   | 1.90E-09              | GTLEDQIIQANPALEAFGNAK |
|    |              |                                                         |      |         | 1183.60 | 2365.19 | 2366.12 | 87.76    | 1.30E-06              | LQFFNHMHFVLEQEEYK     |
| 10 | gj 116325975 | ATP synthase, H+ transporting, mitochondrial F1 comple: | 63   | 551     | 820.50  | 819.49  | 819.40  | 36.13    | 0.29                  | ISEASDAK              |
|    |              |                                                         |      |         | 1197.66 | 1196.65 | 1196.64 | 46.09    | 0.025                 | VVDALGNPIDGK          |
|    |              |                                                         |      |         | 644.18  | 1286.34 | 1286.69 | 72.39    | 6.10E-05              | HALIYDDLK             |
|    |              |                                                         |      |         | 651.57  | 1301.13 | 1299.74 | 86.66    | 2.30E-06              | TAIAIDTIINQK          |
|    |              |                                                         |      |         | 682.65  | 1363.29 | 1362.69 | 91.50    | 7.00E-07              | TGTAEVSSILEEK         |
|    |              |                                                         |      |         | 766.40  | 1530.79 | 1530.75 | 121.91   | 6.70E-10              | ILGADTGAELEETGR       |
|    |              |                                                         |      |         | 1625.03 | 1624.02 | 1623.88 | 75.60    | 2.70E-05              | TGAIVDVPVGEELLGR      |
|    |              |                                                         |      |         | 1030.06 | 2058.11 | 2059.13 | 80.08    | 8.20E-06              | AFLQHVISQHQDLLAIR     |

|         |              |                                                         |        |          |                     |         |         |        |          |                        |
|---------|--------------|---------------------------------------------------------|--------|----------|---------------------|---------|---------|--------|----------|------------------------|
| 11      | gi 189536979 | PREDICTED: similar to slow myosin heavy chain 3 isoform | 55     | 1934     | 1054.00             | 2105.98 | 2103.03 | 59.97  | 0.00086  | GMSLNLEPDNVGVVVFVFNNDK |
|         |              |                                                         |        |          | 1156.38             | 2310.75 | 2308.15 | 46.53  | 0.018    | QGQYSPMAIEEQVAVIYAGVR  |
|         |              |                                                         |        |          | 1183.48             | 2364.95 | 2364.17 | 140.40 | 7.00E-12 | EVAFAQFGSDLLAATQQLLR   |
|         |              |                                                         |        |          | 496.07              | 990.13  | 989.50  | 55.65  | 0.0033   | SNNFQKPR               |
|         |              |                                                         |        |          | 538.17              | 1074.32 | 1073.54 | 42.91  | 0.063    | ADIAESQVVK             |
|         |              |                                                         |        |          | 1182.68             | 1181.67 | 1180.57 | 49.43  | 0.011    | DFEISQLSSR             |
|         |              |                                                         |        |          | 612.98              | 1223.95 | 1223.61 | 40.18  | 0.093    | TKYETDAIQR             |
|         |              |                                                         |        |          | 623.38              | 1244.75 | 1244.65 | 82.73  | 6.20E-06 | DIDDLELTLAK            |
|         |              |                                                         |        |          | 661.87              | 1321.73 | 1320.66 | 42.87  | 0.05     | KLEDECSELKK            |
|         |              |                                                         |        |          | 1368.64             | 1367.63 | 1367.63 | 66.26  | 0.00023  | LQHELDEAEER            |
|         |              |                                                         |        |          | 687.67              | 1373.32 | 1372.74 | 51.55  | 0.0072   | KDIDDLELTLAK           |
|         |              |                                                         |        |          | 743.81              | 1485.60 | 1485.73 | 96.91  | 2.00E-07 | LQDAEEAVEAVNAK         |
|         |              |                                                         |        |          | 748.76              | 1495.50 | 1495.73 | 54.59  | 0.0032   | KLQHELDEAEER           |
|         |              |                                                         |        |          | 752.63              | 1503.25 | 1502.76 | 89.35  | 1.20E-06 | ENQSILITGESGAGK        |
|         |              |                                                         |        |          | 754.50              | 1506.99 | 1506.60 | 38.10  | 0.15     | EEQAEADGTEDADK         |
|         |              |                                                         |        |          | 761.65              | 1521.28 | 1520.76 | 81.03  | 7.70E-06 | AITDAAMMAEELKK         |
|         |              |                                                         |        |          | 796.88              | 1591.74 | 1591.75 | 40.27  | 0.091    | LSEKDEEMEQAKR          |
|         |              |                                                         |        |          | 817.80              | 1633.58 | 1631.78 | 111.28 | 7.50E-09 | LEEAGGATAAQIEMNK       |
|         |              |                                                         |        |          | 852.23              | 1702.45 | 1701.82 | 98.48  | 1.30E-07 | LQNEIEDLMVDVER         |
|         |              |                                                         |        |          | 859.76              | 1717.51 | 1716.90 | 83.45  | 4.40E-06 | NKDPLNETVVGLYQK        |
| 862.60  | 1723.19      | 1721.94                                                 | 82.68  | 5.20E-06 | VQLLHSQNTSLLNQK     |         |         |        |          |                        |
| 896.44  | 1790.86      | 1790.76                                                 | 78.77  | 1.30E-05 | QREEQAEADGTEDADK    |         |         |        |          |                        |
| 931.71  | 1861.40      | 1858.88                                                 | 102.14 | 5.50E-08 | LEQQVDDLEGSLEQEK    |         |         |        |          |                        |
| 948.63  | 1895.24      | 1895.90                                                 | 67.35  | 0.00016  | HADSVSDLGEQIDNLQR   |         |         |        |          |                        |
| 989.22  | 1976.43      | 1976.89                                                 | 60.09  | 0.00083  | MEGDLNEMEIQLSQANR   |         |         |        |          |                        |
| 994.44  | 1986.87      | 1986.97                                                 | 82.62  | 4.70E-06 | LEQQVDDLEGSLEQEKK   |         |         |        |          |                        |
| 1183.60 | 2365.19      | 2366.12                                                 | 87.76  | 1.30E-06 | LQFFNHHMFVLEQEEYK   |         |         |        |          |                        |
| 12      | gi 29725603  | myosin, light polypeptide 7, regulatory [Danio rerio]   | 59.9   | 172      | 639.21              | 1276.41 | 1273.67 | 43.69  | 0.046    | LDFPNATGVVVK           |
|         |              |                                                         |        |          | 810.67              | 1619.33 | 1617.83 | 96.66  | 2.10E-07 | LNGTDPEETILAAFV        |
| 13      | gi 189540220 | PREDICTED: hypothetical protein LOC393472 [Danio rerio] | 42.1   | 1937     | 1046.59             | 2091.17 | 2091.96 | 85.68  | 2.30E-06 | GSSNVFSMFESQIQEFK      |
|         |              |                                                         |        |          | 1292.44             | 2582.87 | 2582.25 | 104.64 | 2.40E-08 | FTAEVVDQAFVAPIDVAGNIDY |
| 14      | gi 189525553 | PREDICTED: hypothetical protein LOC336197 [Danio rerio] | 85.1   | 517      | 538.17              | 1074.32 | 1073.54 | 42.91  | 0.063    | ADIAESQVVK             |
|         |              |                                                         |        |          | 612.98              | 1223.95 | 1223.61 | 40.18  | 0.093    | TKYETDAIQR             |
|         |              |                                                         |        |          | 623.38              | 1244.75 | 1244.65 | 82.73  | 6.20E-06 | DIDDLELTLAK            |
|         |              |                                                         |        |          | 661.87              | 1321.73 | 1320.66 | 42.87  | 0.05     | KLEDECSELKK            |
|         |              |                                                         |        |          | 687.67              | 1373.32 | 1372.74 | 51.55  | 0.0072   | KDIDDLELTLAK           |
|         |              |                                                         |        |          | 752.63              | 1503.25 | 1502.76 | 89.35  | 1.20E-06 | ENQSILITGESGAGK        |
|         |              |                                                         |        |          | 761.65              | 1521.28 | 1520.76 | 81.03  | 7.70E-06 | AITDAAMMAEELKK         |
|         |              |                                                         |        |          | 817.80              | 1633.58 | 1631.78 | 111.28 | 7.50E-09 | LEEAGGATAAQIEMNK       |
|         |              |                                                         |        |          | 931.71              | 1861.40 | 1858.88 | 102.14 | 5.50E-08 | LEQQVDDLEGSLEQEK       |
|         |              |                                                         |        |          | 942.98              | 1883.95 | 1884.92 | 100.93 | 7.00E-08 | QADSVDELGEQIDNLQR      |
|         |              |                                                         |        |          | 994.44              | 1986.87 | 1986.97 | 82.62  | 4.70E-06 | LEQQVDDLEGSLEQEKK      |
|         |              |                                                         |        |          | 1183.60             | 2365.19 | 2366.12 | 87.76  | 1.30E-06 | LQFFNHHMFVLEQEEYK      |
|         |              |                                                         |        |          | 471.62              | 941.22  | 940.53  | 45.28  | 0.03     | VLDTGAPIR              |
|         |              |                                                         |        |          | 545.57              | 1089.13 | 1087.63 | 44.02  | 0.048    | VVDLLAPYAK             |
|         |              |                                                         |        |          | 693.70              | 1385.39 | 1384.70 | 73.21  | 5.00E-05 | IMNVIGEPIDER           |
|         |              |                                                         |        |          | 1407.02             | 1406.01 | 1405.67 | 38.39  | 0.15     | AHGGYSVFAGVGER         |
|         |              |                                                         |        |          | 718.44              | 1434.87 | 1434.75 | 96.54  | 2.20E-07 | FTQAGSEVSALLGR         |
|         |              |                                                         |        |          | 729.47              | 1456.93 | 1456.83 | 90.05  | 9.80E-07 | TVLIMELINNVAK          |
|         |              |                                                         |        |          | 839.54              | 1677.07 | 1676.92 | 99.39  | 1.10E-07 | LVLEVAQHLGENTVR        |
|         |              |                                                         |        |          | 916.20              | 1830.39 | 1828.88 | 61.80  | 0.00061  | IMDPNIVGTEHYDVAR       |
| 994.51  | 1987.01      | 1987.03                                                 | 85.08  | 2.70E-06 | AIAELGIYPAVDPLDSTSR |         |         |        |          |                        |

|    |              |                                                        |      |         |         |         |         |          |                          |                       |
|----|--------------|--------------------------------------------------------|------|---------|---------|---------|---------|----------|--------------------------|-----------------------|
|    |              |                                                        |      | 1004.49 | 2006.96 | 2004.05 | 45.00   | 0.026    | FLSQPFQVAEVFTGHLGK       |                       |
|    |              |                                                        |      | 688.51  | 2062.50 | 2059.99 | 44.65   | 0.029    | EGNDLYHEMIESGVINLK       |                       |
|    |              |                                                        |      | 1060.47 | 2118.93 | 2118.04 | 99.97   | 8.40E-08 | SLQDIIAILGMDELSEEDK      |                       |
|    |              |                                                        |      | 1329.90 | 2657.78 | 2658.38 | 94.91   | 2.30E-07 | SLQDIIAILGMDELSEEDKLTVAR |                       |
|    |              |                                                        |      | 1492.02 | 2982.02 | 2981.47 | 59.23   | 0.00072  | SILGGEYDALPEQAFYMGPIEE   |                       |
|    |              |                                                        |      | 1239.89 | 3716.65 | 3713.88 | 38.82   | 0.059    | GSITSVQAIYVPADDLTPAPAT   |                       |
|    |              |                                                        |      | 1282.42 | 3844.24 | 3841.97 | 68.79   | 5.60E-05 | KGSITSVQAIYVPADDLTPAPA   |                       |
| 15 | gj 189520343 | PREDICTED: similar to myosin heavy chain fast skeletal | 48.5 | 1933    | 538.17  | 1074.32 | 1073.54 | 42.91    | 0.063                    | ADIAESQVNK            |
|    |              |                                                        |      |         | 612.98  | 1223.95 | 1223.61 | 40.18    | 0.093                    | TKYETDAIQR            |
|    |              |                                                        |      |         | 623.38  | 1244.75 | 1244.65 | 82.73    | 6.20E-06                 | DIDDLELTLAK           |
|    |              |                                                        |      |         | 661.87  | 1321.73 | 1320.66 | 42.87    | 0.05                     | KLEDECSELKK           |
|    |              |                                                        |      |         | 687.67  | 1373.32 | 1372.74 | 51.55    | 0.0072                   | KDIDDLELTLAK          |
|    |              |                                                        |      |         | 748.77  | 1495.52 | 1494.74 | 53.40    | 0.0043                   | KVQHELEEAQER          |
|    |              |                                                        |      |         | 752.63  | 1503.25 | 1502.76 | 89.35    | 1.20E-06                 | ENQSILITGESGAGK       |
|    |              |                                                        |      |         | 761.65  | 1521.28 | 1520.76 | 81.03    | 7.70E-06                 | AITDAAMMAEELKK        |
|    |              |                                                        |      |         | 825.52  | 1649.02 | 1647.78 | 50.84    | 0.0082                   | LEEAGGATSAQIEMNK      |
|    |              |                                                        |      |         | 846.53  | 1691.04 | 1690.81 | 65.90    | 0.00026                  | NSYEETLDHLETLK        |
|    |              |                                                        |      |         | 931.71  | 1861.40 | 1858.88 | 102.14   | 5.50E-08                 | LEQQVDDLEGSLEQEK      |
|    |              |                                                        |      |         | 942.98  | 1883.95 | 1884.92 | 100.93   | 7.00E-08                 | QADSV AELGEQIDNLQR    |
|    |              |                                                        |      |         | 994.44  | 1986.87 | 1986.97 | 82.62    | 4.70E-06                 | LEQQVDDLEGSLEQEKK     |
|    |              |                                                        |      |         | 1183.60 | 2365.19 | 2366.12 | 87.76    | 1.30E-06                 | LQQFFNHHMFVLEQEEYK    |
| 16 | gj 66472732  | myosin heavy chain 4 [Danio rerio]                     | 45.7 | 1935    | 612.98  | 1223.95 | 1223.61 | 40.18    | 0.093                    | TKYETDAIQR            |
|    |              |                                                        |      |         | 623.38  | 1244.75 | 1244.65 | 82.73    | 6.20E-06                 | DIDDLELTLAK           |
|    |              |                                                        |      |         | 661.87  | 1321.73 | 1320.66 | 42.87    | 0.05                     | KLEDECSELKK           |
|    |              |                                                        |      |         | 687.67  | 1373.32 | 1372.74 | 51.55    | 0.0072                   | KDIDDLELTLAK          |
|    |              |                                                        |      |         | 745.59  | 1489.17 | 1488.74 | 49.21    | 0.012                    | ENQSVLITGESGAGK       |
|    |              |                                                        |      |         | 748.77  | 1495.52 | 1495.73 | 65.05    | 0.00029                  | KVQHELEEAER           |
|    |              |                                                        |      |         | 761.65  | 1521.28 | 1520.76 | 81.03    | 7.70E-06                 | AITDAAMMAEELKK        |
|    |              |                                                        |      |         | 817.80  | 1633.58 | 1631.78 | 111.28   | 7.50E-09                 | LEEAGGATAAQIEMNK      |
|    |              |                                                        |      |         | 931.71  | 1861.40 | 1858.88 | 102.14   | 5.50E-08                 | LEQQVDDLEGSLEQEK      |
|    |              |                                                        |      |         | 942.98  | 1883.95 | 1884.92 | 100.93   | 7.00E-08                 | QADSV AELGEQIDNLQR    |
|    |              |                                                        |      |         | 994.44  | 1986.87 | 1986.97 | 82.62    | 4.70E-06                 | LEQQVDDLEGSLEQEKK     |
|    |              |                                                        |      |         | 1044.14 | 2086.27 | 2088.02 | 75.58    | 2.30E-05                 | TKLEQQVDDLEGSLEQEK    |
|    |              |                                                        |      |         | 1107.99 | 2213.97 | 2213.03 | 75.84    | 2.10E-05                 | AEIQTAL EEAEGTLEHEESK |
|    |              |                                                        |      |         | 739.60  | 2215.76 | 2216.12 | 50.27    | 0.0076                   | TKLEQQVDDLEGSLEQEKK   |
|    |              |                                                        |      |         | 1183.60 | 2365.19 | 2366.12 | 87.76    | 1.30E-06                 | LQQFFNHHMFVLEQEEYK    |
| 17 | gj 189519131 | PREDICTED: ns:zf-e68 [Danio rerio]                     | 47.8 | 1935    | 538.17  | 1074.32 | 1073.54 | 42.91    | 0.063                    | ADIAESQVNK            |
|    |              |                                                        |      |         | 612.98  | 1223.95 | 1223.61 | 40.18    | 0.093                    | TKYETDAIQR            |
|    |              |                                                        |      |         | 623.38  | 1244.75 | 1244.65 | 82.73    | 6.20E-06                 | DIDDLELTLAK           |
|    |              |                                                        |      |         | 661.87  | 1321.73 | 1320.66 | 42.87    | 0.05                     | KLEDECSELKK           |
|    |              |                                                        |      |         | 687.67  | 1373.32 | 1372.74 | 51.55    | 0.0072                   | KDIDDLELTLAK          |
|    |              |                                                        |      |         | 745.59  | 1489.17 | 1488.74 | 49.21    | 0.012                    | ENQSVLITGESGAGK       |
|    |              |                                                        |      |         | 748.77  | 1495.52 | 1495.73 | 65.05    | 0.00029                  | KVQHELEEAER           |
|    |              |                                                        |      |         | 761.65  | 1521.28 | 1520.76 | 81.03    | 7.70E-06                 | AITDAAMMAEELKK        |
|    |              |                                                        |      |         | 817.80  | 1633.58 | 1631.78 | 111.28   | 7.50E-09                 | LEEAGGATAAQIEMNK      |
|    |              |                                                        |      |         | 931.71  | 1861.40 | 1858.88 | 102.14   | 5.50E-08                 | LEQQVDDLEGSLEQEK      |
|    |              |                                                        |      |         | 942.98  | 1883.95 | 1884.92 | 100.93   | 7.00E-08                 | QADSV AELGEQIDNLQR    |
|    |              |                                                        |      |         | 994.44  | 1986.87 | 1986.97 | 82.62    | 4.70E-06                 | LEQQVDDLEGSLEQEKK     |
|    |              |                                                        |      |         | 1044.14 | 2086.27 | 2088.02 | 75.58    | 2.30E-05                 | TKLEQQVDDLEGSLEQEK    |
|    |              |                                                        |      |         | 1107.99 | 2213.97 | 2213.03 | 75.84    | 2.10E-05                 | AEIQTAL EEAEGTLEHEESK |
|    |              |                                                        |      |         | 739.60  | 2215.76 | 2216.12 | 50.27    | 0.0076                   | TKLEQQVDDLEGSLEQEKK   |
|    |              |                                                        |      |         | 1183.60 | 2365.19 | 2366.12 | 87.76    | 1.30E-06                 | LQQFFNHHMFVLEQEEYK    |

|         |              |                                                   |       |          |            |             |                                                         |        |          |                          |         |         |       |       |            |
|---------|--------------|---------------------------------------------------|-------|----------|------------|-------------|---------------------------------------------------------|--------|----------|--------------------------|---------|---------|-------|-------|------------|
| 18      | gi 23097290  | troponin T2, cardiac [Danio rerio]                | 29.8  | 282      | 718.41     | 717.40      | 717.35                                                  | 38.58  | 0.21     | ELEAEK                   |         |         |       |       |            |
|         |              |                                                   |       |          | 431.68     | 861.35      | 861.41                                                  | 41.02  | 0.1      | KEEEEEAK                 |         |         |       |       |            |
|         |              |                                                   |       |          | 580.62     | 1159.23     | 1158.57                                                 | 37.45  | 0.21     | FELQYQFGK                |         |         |       |       |            |
|         |              |                                                   |       |          | 1217.66    | 1216.65     | 1216.66                                                 | 71.14  | 9.10E-05 | KEEEEEIISLK              |         |         |       |       |            |
|         |              |                                                   |       |          | 674.08     | 1346.15     | 1344.75                                                 | 80.98  | 8.40E-06 | KKEEEEEIISLK             |         |         |       |       |            |
|         |              |                                                   |       |          | 571.64     | 1711.88     | 1710.90                                                 | 63.71  | 0.00039  | RKPLDIDNANESALR          |         |         |       |       |            |
|         |              |                                                   |       |          | 958.25     | 1914.48     | 1913.95                                                 | 89.43  | 1.00E-06 | DLNELQTLIEAHFESR         |         |         |       |       |            |
| 19      | gi 189540216 | PREDICTED: wu:fd14a01 [Danio rerio]               | 47.3  | 1936     | 538.17     | 1074.32     | 1073.54                                                 | 42.91  | 0.063    | ADIAESQVNK               |         |         |       |       |            |
|         |              |                                                   |       |          | 612.98     | 1223.95     | 1223.61                                                 | 40.18  | 0.093    | TKYETDAIQR               |         |         |       |       |            |
|         |              |                                                   |       |          | 623.38     | 1244.75     | 1244.65                                                 | 82.73  | 6.20E-06 | DIDDLELTLAK              |         |         |       |       |            |
|         |              |                                                   |       |          | 661.87     | 1321.73     | 1320.66                                                 | 42.87  | 0.05     | KLEDECSELKK              |         |         |       |       |            |
|         |              |                                                   |       |          | 687.67     | 1373.32     | 1372.74                                                 | 51.55  | 0.0072   | KDIDDLELTLAK             |         |         |       |       |            |
|         |              |                                                   |       |          | 745.59     | 1489.17     | 1488.74                                                 | 49.21  | 0.012    | ENQSVLITGESGAGK          |         |         |       |       |            |
|         |              |                                                   |       |          | 761.65     | 1521.28     | 1520.76                                                 | 81.03  | 7.70E-06 | AITDAAMMAEELKK           |         |         |       |       |            |
|         |              |                                                   |       |          | 817.80     | 1633.58     | 1631.78                                                 | 111.28 | 7.50E-09 | LEEAGGATAAQIEMNK         |         |         |       |       |            |
|         |              |                                                   |       |          | 931.71     | 1861.40     | 1858.88                                                 | 102.14 | 5.50E-08 | LEQQVDDLEGSLEQEK         |         |         |       |       |            |
|         |              |                                                   |       |          | 942.98     | 1883.95     | 1884.92                                                 | 100.93 | 7.00E-08 | QADSVaelGEQIDNLQR        |         |         |       |       |            |
| 20      | gi 55926111  | cardiac myosin light chain-1 [Danio rerio]        | 71.9  | 196      | 994.44     | 1986.87     | 1986.97                                                 | 82.62  | 4.70E-06 | LEQQVDDLEGSLEQEKK        |         |         |       |       |            |
|         |              |                                                   |       |          | 1183.60    | 2365.19     | 2366.12                                                 | 87.76  | 1.30E-06 | LQQFFNHMFVLEQEEYK        |         |         |       |       |            |
|         |              |                                                   |       |          | 968.51     | 967.50      | 966.55                                                  | 60.55  | 0.00083  | HVLATLGEK                |         |         |       |       |            |
|         |              |                                                   |       |          | 757.12     | 1512.23     | 1511.69                                                 | 84.28  | 3.60E-06 | DQGTfEDFVEGLR            |         |         |       |       |            |
|         |              |                                                   |       |          | 855.80     | 1709.59     | 1710.82                                                 | 89.24  | 1.10E-06 | AKDQGTfEDFVEGLR          |         |         |       |       |            |
|         |              |                                                   |       |          | 889.86     | 1777.70     | 1777.85                                                 | 80.93  | 8.10E-06 | SVPLDFSPDQIEEFR          |         |         |       |       |            |
|         |              |                                                   |       |          | 972.94     | 1943.87     | 1944.08                                                 | 94.30  | 3.10E-07 | ALGHNPTNADVLTVLGKPK      |         |         |       |       |            |
|         |              |                                                   |       |          | 1186.45    | 2370.88     | 2370.23                                                 | 71.44  | 5.60E-05 | KEEAPAPAPVPETPKEPEVDLK   |         |         |       |       |            |
|         |              |                                                   |       |          | 21         | gi 66773080 | ATP synthase, H+ transporting, mitochondrial F1 comple: | 80.5   | 517      | 471.62                   | 941.22  | 940.53  | 45.28 | 0.03  | VLDTGAPIR  |
|         |              |                                                   |       |          |            |             |                                                         |        |          | 545.57                   | 1089.13 | 1087.63 | 44.02 | 0.048 | VVDLLAPYAK |
| 693.70  | 1385.39      | 1384.70                                           | 73.21 | 5.00E-05 |            |             |                                                         |        |          | IMNVIGEPIDER             |         |         |       |       |            |
| 1407.02 | 1406.01      | 1405.67                                           | 38.39 | 0.15     |            |             |                                                         |        |          | AHGGYSVFAGVGER           |         |         |       |       |            |
| 718.44  | 1434.87      | 1434.75                                           | 96.54 | 2.20E-07 |            |             |                                                         |        |          | FTQAGSEVSALLGR           |         |         |       |       |            |
| 729.47  | 1456.93      | 1456.83                                           | 90.05 | 9.80E-07 |            |             |                                                         |        |          | TVLIMELINNVAK            |         |         |       |       |            |
| 839.54  | 1677.07      | 1676.92                                           | 99.39 | 1.10E-07 |            |             |                                                         |        |          | LVLEVAQHLGENTVR          |         |         |       |       |            |
| 916.20  | 1830.39      | 1828.88                                           | 61.80 | 0.00061  |            |             |                                                         |        |          | IMDPNIVGTEHYDVAR         |         |         |       |       |            |
| 994.51  | 1987.01      | 1987.03                                           | 85.08 | 2.70E-06 |            |             |                                                         |        |          | AIAELGIYPAVDPLDSTSR      |         |         |       |       |            |
| 1004.49 | 2006.96      | 2004.05                                           | 45.00 | 0.026    |            |             |                                                         |        |          | FLSQPFQVAEVFTGHLGK       |         |         |       |       |            |
| 22      | gi 51592073  | actin, alpha, cardiac muscle 1 like [Danio rerio] | 59.9  | 377      | 688.51     | 2062.50     | 2059.99                                                 | 44.65  | 0.029    | EGNDLYHEMIESGVINLK       |         |         |       |       |            |
|         |              |                                                   |       |          | 1492.02    | 2982.02     | 2981.47                                                 | 59.23  | 0.00072  | SILGGEYDALPEQAFYMGPIEE   |         |         |       |       |            |
|         |              |                                                   |       |          | 1239.89    | 3716.65     | 3713.88                                                 | 38.82  | 0.059    | GSITSVQAIYVPADDLTD PAPAT |         |         |       |       |            |
|         |              |                                                   |       |          | 1282.42    | 3844.24     | 3841.97                                                 | 68.79  | 5.60E-05 | KGSITSVQAIYVPADDLTD PAPA |         |         |       |       |            |
|         |              |                                                   |       |          | 489.44     | 976.86      | 975.44                                                  | 48.58  | 0.016    | AGFAGDDAPR               |         |         |       |       |            |
|         |              |                                                   |       |          | 566.61     | 1131.20     | 1129.54                                                 | 50.00  | 0.012    | GYSFVTTAER               |         |         |       |       |            |
|         |              |                                                   |       |          | 1161.09    | 1160.08     | 1160.61                                                 | 45.99  | 0.029    | EITALAPSTMK              |         |         |       |       |            |
|         |              |                                                   |       |          | 600.12     | 1198.22     | 1197.70                                                 | 43.75  | 0.045    | AVFPSIVGRPR              |         |         |       |       |            |
|         |              |                                                   |       |          | 895.41     | 1788.80     | 1789.88                                                 | 109.38 | 1.10E-08 | SYELPDGQVITIGNER         |         |         |       |       |            |
|         |              |                                                   |       |          | 977.94     | 1953.87     | 1955.04                                                 | 84.21  | 3.20E-06 | VAPeeHPTLLTEAPLNPK       |         |         |       |       |            |
| 23      | gi 18858539  | desmin [Danio rerio]                              | 49.5  | 473      | 1115.18    | 2228.34     | 2227.06                                                 | 49.56  | 0.0091   | DLYANNVLSGGTTMYPGIADR    |         |         |       |       |            |
|         |              |                                                   |       |          | 1066.60    | 3196.78     | 3195.60                                                 | 56.69  | 0.0012   | TTGIVLDSGDGVTHNVPIYEGYA  |         |         |       |       |            |
|         |              |                                                   |       |          | 544.45     | 1086.88     | 1086.57                                                 | 53.90  | 0.005    | VSDLNQAVNK               |         |         |       |       |            |
|         |              |                                                   |       |          | 549.51     | 1097.01     | 1094.55                                                 | 50.25  | 0.01     | AELQHLNDR                |         |         |       |       |            |
|         |              |                                                   |       |          | 591.47     | 1180.92     | 1179.55                                                 | 48.04  | 0.016    | EAGGYQDTIAR              |         |         |       |       |            |
|         |              |                                                   |       |          | 1254.56    | 1253.55     | 1253.56                                                 | 47.66  | 0.017    | NISEAEDWYK               |         |         |       |       |            |
| 642.15  | 1282.28      | 1281.59                                           | 37.33 | 0.18     | IAELYEEEMR |             |                                                         |        |          |                          |         |         |       |       |            |

|    |              |                                         |      |         |         |         |         |          |                        |                          |
|----|--------------|-----------------------------------------|------|---------|---------|---------|---------|----------|------------------------|--------------------------|
|    |              |                                         |      | 889.27  | 1776.52 | 1775.91 | 103.59  | 4.40E-08 | FLEQQNSALTVEIER        |                          |
|    |              |                                         |      | 991.08  | 1980.14 | 1978.97 | 91.31   | 6.40E-07 | LDNFLADAINQDFLNTR      |                          |
|    |              |                                         |      | 1094.25 | 2186.48 | 2186.00 | 133.47  | 3.80E-11 | TFGSGLGSSIFAGHGSSGSSGS |                          |
| 24 | gj 47551317  | enolase 3, (beta, muscle) [Danio rerio] | 68.1 | 433     | 469.64  | 937.27  | 937.50  | 41.97    | 0.061                  | HIADLAGNK                |
|    |              |                                         |      |         | 573.42  | 1144.82 | 1142.61 | 42.17    | 0.07                   | IGAEVYHNLK               |
|    |              |                                         |      |         | 719.58  | 1437.14 | 1435.72 | 86.91    | 2.00E-06               | GNPTVEVDLYTTK            |
|    |              |                                         |      |         | 1053.67 | 2105.32 | 2104.07 | 89.76    | 9.10E-07               | FTGSVDIQVVGDDLTVTNPK     |
|    |              |                                         |      |         | 1060.03 | 2118.04 | 2118.12 | 91.79    | 5.50E-07               | DVILPVPAFNVIINGGSHAGNK   |
|    |              |                                         |      |         | 1372.83 | 2743.65 | 2742.33 | 73.97    | 2.70E-05               | DATNVGDEGGFAPNILENNEALI  |
| 25 | gj 189523697 | PREDICTED: im:6911926 [Danio rerio]     | 47.4 | 28836   | 431.68  | 861.35  | 860.46  | 39.18    | 0.15                   | KKEEEAK                  |
|    |              |                                         |      |         | 701.73  | 1401.45 | 1399.71 | 64.74    | 0.00035                | HVSVEALDFIDR             |
|    |              |                                         |      |         | 763.17  | 1524.32 | 1523.73 | 49.92    | 0.0097                 | SDSGVYYLHLENK            |
|    |              |                                         |      |         | 787.63  | 1573.25 | 1572.78 | 78.62    | 1.40E-05               | FGQSGPSEPSGPVVTK         |
|    |              |                                         |      |         | 802.58  | 1603.15 | 1602.86 | 37.57    | 0.18                   | YGVSEPLVSQNVIAK          |
|    |              |                                         |      |         | 823.16  | 1644.31 | 1642.77 | 62.59    | 0.00054                | VHGLIEDHEYEFR            |
|    |              |                                         |      |         | 878.68  | 1755.35 | 1752.99 | 47.59    | 0.016                  | EAEILKPLASVEVVEK         |
|    |              |                                         |      |         | 885.70  | 1769.38 | 1768.91 | 59.08    | 0.0011                 | SSVTLTWVKPAHDGGSK        |
|    |              |                                         |      |         | 894.79  | 1787.56 | 1787.83 | 38.15    | 0.15                   | GENKVDVEYDEHINK          |
|    |              |                                         |      |         | 920.77  | 1839.53 | 1838.93 | 62.48    | 0.00051                | STVSLAWEKPLHDGGSR        |
|    |              |                                         |      |         | 923.72  | 1845.43 | 1845.01 | 63.56    | 0.0004                 | VQILDKPGPPAGHIEFK        |
|    |              |                                         |      |         | 928.68  | 1855.35 | 1854.92 | 75.30    | 2.60E-05               | TSVSLSWEKPIHDGGSR        |
|    |              |                                         |      |         | 940.54  | 1879.06 | 1877.90 | 56.82    | 0.0018                 | VLNYDEEVDDTRPVSK         |
|    |              |                                         |      |         | 950.74  | 1899.47 | 1898.91 | 53.37    | 0.004                  | TTVTLSEKPEHDGGSR         |
|    |              |                                         |      |         | 988.99  | 1975.96 | 1976.14 | 61.35    | 0.00062                | SQLERPGAPLKPVSGITK       |
|    |              |                                         |      |         | 1002.79 | 2003.56 | 2002.96 | 75.42    | 2.40E-05               | KDNTSDDIGWVTVTSTHK       |
|    |              |                                         |      |         | 1028.44 | 2054.86 | 2055.07 | 95.10    | 2.60E-07               | LKGDVLSASPDVEIIEDGAK     |
|    |              |                                         |      |         | 1033.83 | 2065.64 | 2064.06 | 76.98    | 1.70E-05               | VISGVQDLEYTVTDVIEGK      |
|    |              |                                         |      |         | 1047.32 | 2092.62 | 2092.08 | 64.74    | 0.00028                | INVSALNSEGVGEAAPVPGSPK   |
|    |              |                                         |      |         | 1073.03 | 2144.05 | 2142.23 | 51.74    | 0.0055                 | SFHVQVITLGPPSKPIGPIR     |
|    |              |                                         |      |         | 757.52  | 2269.52 | 2270.33 | 62.36    | 0.00047                | KSFHVQVITLGPPSKPIGPIR    |
|    |              |                                         |      |         | 1258.48 | 2514.94 | 2514.23 | 83.61    | 3.10E-06               | HTLPVDSDISSDTSVVTIPESH   |
|    |              |                                         |      |         | 1326.96 | 2651.91 | 2651.51 | 61.01    | 0.00053                | KKPTLPATILTKPQSLTVSEGES' |
|    |              |                                         |      |         | 902.92  | 2705.72 | 2706.41 | 50.47    | 0.0061                 | TPVLAVDPVEKPGEPENFQITEI' |
|    |              |                                         |      |         | 966.81  | 2897.40 | 2895.47 | 44.42    | 0.022                  | RLDIIDTTDTSVTLAWLKPEHDG  |
| 26 | gj 189523699 | PREDICTED: titin a [Danio rerio]        | 47.9 | 32757   | 824.59  | 823.58  | 822.50  | 52.54    | 0.0049                 | VHIVIDK                  |
|    |              |                                         |      |         | 511.18  | 1020.34 | 1019.54 | 37.43    | 0.21                   | ITDQYRPK                 |
|    |              |                                         |      |         | 567.76  | 1133.51 | 1133.57 | 64.96    | 0.00036                | KGDVTLSDSGR              |
|    |              |                                         |      |         | 705.08  | 1408.14 | 1407.69 | 57.46    | 0.0017                 | TDDKFEVLQEGK             |
|    |              |                                         |      |         | 749.20  | 1496.39 | 1495.81 | 47.75    | 0.016                  | KFDNLFFIEVPK             |
|    |              |                                         |      |         | 781.54  | 1561.07 | 1560.75 | 40.14    | 0.095                  | EHSEVIPHTQQEK            |
|    |              |                                         |      |         | 819.76  | 1637.51 | 1636.89 | 41.42    | 0.068                  | VEIPDIELPDELKK           |
|    |              |                                         |      |         | 878.68  | 1755.35 | 1752.99 | 47.59    | 0.016                  | EAEILKPLASVEVVEK         |
|    |              |                                         |      |         | 907.31  | 1812.60 | 1811.95 | 45.44    | 0.026                  | IGVGETADIPGSVIIEDK       |
|    |              |                                         |      |         | 908.46  | 1814.91 | 1812.91 | 55.97    | 0.0023                 | ASQAPSAPDDLIVTDVSK       |
|    |              |                                         |      |         | 926.82  | 1851.63 | 1850.96 | 67.65    | 0.00015                | STVILGWEEKPLHDGGSR       |
|    |              |                                         |      |         | 623.27  | 1866.79 | 1866.98 | 62.77    | 0.00048                | RRDEEAPTQIVPDITK         |
|    |              |                                         |      |         | 940.78  | 1879.54 | 1878.92 | 96.56    | 1.90E-07               | TPLHDGGAEVSHYIVER        |
|    |              |                                         |      |         | 947.81  | 1893.61 | 1892.90 | 71.72    | 5.80E-05               | HTVTLSEKPDHDGGSK         |
|    |              |                                         |      |         | 962.72  | 1923.43 | 1922.99 | 53.01    | 0.0043                 | AVNAAGVGEPGEVADVIEVK     |
|    |              |                                         |      |         | 976.57  | 1951.13 | 1950.02 | 85.98    | 2.10E-06               | SSDIVQISSTPTSSTLSIK      |
|    |              |                                         |      |         | 1029.44 | 2056.87 | 2056.09 | 59.01    | 0.001                  | ELPISFVTPLADVHVYEK       |
|    |              |                                         |      |         | 1052.34 | 2102.66 | 2102.05 | 88.77    | 1.10E-06               | EQVTHQAALLQSHEVQER       |

|    |              |                                                        |      |         |         |         |         |          |                         |                          |
|----|--------------|--------------------------------------------------------|------|---------|---------|---------|---------|----------|-------------------------|--------------------------|
|    |              |                                                        |      | 1060.46 | 2118.90 | 2118.12 | 44.96   | 0.027    | ASIEITPSFTLLIENVDR      |                          |
|    |              |                                                        |      | 1062.63 | 2123.25 | 2122.13 | 56.57   | 0.0018   | VLDRPGPSSGPLDITGLTAEK   |                          |
|    |              |                                                        |      | 1080.01 | 2158.01 | 2157.24 | 74.26   | 3.10E-05 | KVPAKPVEAITVPTEEPPKK    |                          |
|    |              |                                                        |      | 734.17  | 2199.49 | 2199.29 | 49.32   | 0.01     | KEPKPESILQVISTPVPLPK    |                          |
|    |              |                                                        |      | 1114.26 | 2226.51 | 2226.10 | 51.16   | 0.0064   | EHVIEWFKPENDGGSEIK      |                          |
|    |              |                                                        |      | 1133.89 | 2265.77 | 2265.23 | 56.10   | 0.002    | KEQHKKPVVLSVNETTQTLSK   |                          |
|    |              |                                                        |      | 1137.55 | 2273.09 | 2271.31 | 36.90   | 0.16     | VEIQDKPLLPEGPVVVDALLK   |                          |
|    |              |                                                        |      | 1151.39 | 2300.76 | 2300.07 | 97.12   | 1.50E-07 | EVTNSVTLSEKPDHDGGSR     |                          |
|    |              |                                                        |      | 890.21  | 2667.59 | 2665.41 | 37.44   | 0.12     | KPLNPSENVIIENTESYTHLVIR |                          |
|    |              |                                                        |      | 1682.58 | 5044.72 | 5042.61 | 49.40   | 0.0026   | HQLQADQSSLIPGLDSAISVQPL |                          |
| 27 | gi 38707983  | aconitase 2, mitochondrial [Danio rerio]               | 59   | 782     | 854.52  | 853.51  | 853.47  | 42.30    | 0.051                   | IHETNLK                  |
|    |              |                                                        |      |         | 1160.53 | 1159.52 | 1159.57 | 47.24    | 0.022                   | GEIATLADENK              |
|    |              |                                                        |      |         | 1362.65 | 1361.64 | 1361.61 | 50.84    | 0.0084                  | FEPSSYINYDK              |
|    |              |                                                        |      |         | 786.32  | 1570.62 | 1568.82 | 42.98    | 0.051                   | FKLEPPTGDELPAR           |
|    |              |                                                        |      |         | 1695.86 | 1694.85 | 1694.78 | 63.98    | 0.00039                 | FNPETDYLTAPNGEK          |
|    |              |                                                        |      |         | 878.21  | 1754.41 | 1752.88 | 63.36    | 0.00043                 | IVYGHLD DPAGQEIAR        |
|    |              |                                                        |      |         | 890.24  | 1778.47 | 1777.89 | 41.25    | 0.074                   | QGLLPLTFSNPADYDK         |
|    |              |                                                        |      |         | 1041.78 | 2081.55 | 2080.94 | 106.96   | 1.70E-08                | NNISWVVVDENYEGGSSR       |
|    |              |                                                        |      |         | 1080.47 | 2158.92 | 2157.96 | 40.01    | 0.084                   | DFDPGQD TYQHPPADGSALK    |
|    |              |                                                        |      |         | 1267.12 | 2532.23 | 2532.29 | 157.81   | 1.20E-13                | GHLDNISNLLIGAVNIENDGVN   |
|    |              |                                                        |      |         | 908.79  | 2723.34 | 2721.43 | 56.50    | 0.0015                  | NDANPATHAFVTSPEIVTALAIAI |
| 28 | gi 66792936  | tropomyosin 4 isoform 1 [Danio rerio]                  | 62.7 | 284     | 537.56  | 1073.11 | 1072.55 | 55.86    | 0.0032                  | LDKENAIDR                |
|    |              |                                                        |      |         | 586.09  | 1170.17 | 1169.67 | 73.35    | 5.00E-05                | LVILEGELER               |
|    |              |                                                        |      |         | 623.52  | 1245.02 | 1242.65 | 66.73    | 0.00025                 | IQLVEEELDR               |
|    |              |                                                        |      |         | 628.87  | 1255.73 | 1256.66 | 64.85    | 0.00035                 | QLDDELVGLQK              |
|    |              |                                                        |      |         | 637.15  | 1272.29 | 1271.61 | 72.43    | 6.20E-05                | AADAEGDVAALNR            |
|    |              |                                                        |      |         | 651.07  | 1300.13 | 1297.76 | 59.34    | 0.0012                  | KLVILEGELER              |
|    |              |                                                        |      |         | 700.72  | 1399.42 | 1399.71 | 107.10   | 1.90E-08                | KAADAEGDVAALNR           |
|    |              |                                                        |      |         | 770.15  | 1538.28 | 1537.71 | 100.31   | 8.70E-08                | SIDDLEDELYAQK            |
|    |              |                                                        |      |         | 700.72  | 2099.13 | 2099.09 | 80.39    | 7.70E-06                | LELSEKKAADAEGDVAALNR     |
|    |              |                                                        |      |         | 747.65  | 2239.92 | 2239.05 | 56.88    | 0.0017                  | QTEDEL DKYSEALKDAQEK     |
|    |              |                                                        |      |         | 770.15  | 2307.42 | 2307.18 | 54.59    | 0.0027                  | TVAKLEKSIDDLEDELYAQK     |
| 29 | gi 189537429 | PREDICTED: hypothetical protein [Danio rerio]          | 51.2 | 377     | 489.44  | 976.86  | 975.44  | 48.58    | 0.016                   | AGFAGDDAPR               |
|    |              |                                                        |      |         | 566.61  | 1131.20 | 1129.54 | 50.00    | 0.012                   | GYSFVTTAER               |
|    |              |                                                        |      |         | 1161.09 | 1160.08 | 1160.61 | 45.99    | 0.029                   | EITALAPSTMK              |
|    |              |                                                        |      |         | 600.12  | 1198.22 | 1197.70 | 43.75    | 0.045                   | AVFPSIVGRPR              |
|    |              |                                                        |      |         | 895.41  | 1788.80 | 1789.88 | 109.38   | 1.10E-08                | SYELPDGQVITIGNER         |
|    |              |                                                        |      |         | 977.46  | 1952.91 | 1953.06 | 79.89    | 8.60E-06                | VAP EEHPVLLTEAPLNPK      |
| 30 | gi 18858961  | lactate dehydrogenase B4 [Danio rerio]                 | 55.4 | 334     | 474.55  | 947.09  | 946.60  | 38.80    | 0.16                    | HIIPQIVK                 |
|    |              |                                                        |      |         | 1205.61 | 1204.60 | 1204.61 | 48.45    | 0.016                   | SSADTLWGIQK              |
|    |              |                                                        |      |         | 628.45  | 1254.88 | 1252.64 | 54.64    | 0.0036                  | MVVD SAYEVIK             |
|    |              |                                                        |      |         | 769.60  | 1537.18 | 1537.77 | 108.51   | 1.30E-08                | IVADKDYSVTANSR           |
|    |              |                                                        |      |         | 844.16  | 1686.31 | 1684.85 | 113.65   | 4.30E-09                | ELADELALVDVVEDR          |
|    |              |                                                        |      |         | 857.97  | 1713.92 | 1714.82 | 40.76    | 0.079                   | LNP DIGTDKDAENWK         |
|    |              |                                                        |      |         | 1075.64 | 2149.27 | 2150.13 | 38.31    | 0.12                    | GYTNWAIGLSVADLTETLVK     |
| 31 | gi 125829449 | PREDICTED: similar to myosin heavy chain [Danio rerio] | 43.2 | 1945    | 538.17  | 1074.32 | 1073.54 | 42.91    | 0.063                   | ADIAESQV NK              |
|    |              |                                                        |      |         | 609.71  | 1217.41 | 1215.63 | 70.03    | 0.00011                 | AGLLGQLEEMR              |
|    |              |                                                        |      |         | 623.38  | 1244.75 | 1244.65 | 82.73    | 6.20E-06                | DIDDLEITLAK              |
|    |              |                                                        |      |         | 687.67  | 1373.32 | 1372.74 | 51.55    | 0.0072                  | KDIDDLEITLAK             |
|    |              |                                                        |      |         | 504.06  | 1509.15 | 1507.70 | 37.65    | 0.16                    | SDSSKELEELSER            |
|    |              |                                                        |      |         | 761.65  | 1521.28 | 1520.76 | 81.03    | 7.70E-06                | AITDAAMMAEELKK           |
|    |              |                                                        |      |         | 825.52  | 1649.02 | 1647.78 | 50.84    | 0.0082                  | LEEAGGATSAQIEMNK         |



|    |              |                                                        |      |         |         |         |         |          |                         |                 |
|----|--------------|--------------------------------------------------------|------|---------|---------|---------|---------|----------|-------------------------|-----------------|
|    |              |                                                        |      | 931.71  | 1861.40 | 1858.88 | 102.14  | 5.50E-08 | LEQQVDDLEGSLEQEK        |                 |
|    |              |                                                        |      | 994.44  | 1986.87 | 1986.97 | 82.62   | 4.70E-06 | LEQQVDDLEGSLEQEKK       |                 |
|    |              |                                                        |      | 1107.99 | 2213.97 | 2213.03 | 64.44   | 0.00029  | TEIQAALAEAEGTLEHEESK    |                 |
| 32 | gi 41054651  | isocitrate dehydrogenase 2 (NADP+), mitochondrial [Dan | 57.9 | 449     | 588.63  | 1175.24 | 1174.60 | 50.29    | 0.011                   | ATDFVVNQPGK     |
|    |              |                                                        |      | 677.67  | 1353.33 | 1354.68 | 79.89   | 9.80E-06 | TIEAEAAHGTVTR           |                 |
|    |              |                                                        |      | 716.14  | 1430.27 | 1428.73 | 81.19   | 7.70E-06 | FKDIFQDIFEK             |                 |
|    |              |                                                        |      | 861.03  | 1720.05 | 1719.82 | 124.78  | 3.30E-10 | DQTDDQVTIDSAIATK        |                 |
|    |              |                                                        |      | 947.29  | 1892.57 | 1891.93 | 67.72   | 0.00015  | LNEHYVNTTDFLDAIK        |                 |
| 33 | gi 41053595  | nucleoside diphosphate kinase-Z2 [Danio rerio]         | 90.2 | 153     | 1099.60 | 1098.59 | 1098.53 | 48.38    | 0.016                   | NLIHGSDSEK      |
|    |              |                                                        |      | 1100.63 | 1099.62 | 1098.53 | 52.09   | 0.0074   | NLIHGSDSEK              |                 |
|    |              |                                                        |      | 974.87  | 1947.73 | 1949.07 | 126.73  | 1.80E-10 | GFRLVAAKFVQASEDLAK      |                 |
|    |              |                                                        |      | 1106.96 | 2211.90 | 2211.12 | 85.26   | 2.40E-06 | SAATEVSLWFKPEELVSYR     |                 |
| 34 | gi 47085883  | hypothetical protein LOC406405 [Danio rerio]           | 88.7 | 337     | 465.05  | 928.09  | 927.46  | 41.82    | 0.074                   | HGVYNPNK        |
|    |              |                                                        |      | 537.92  | 1073.83 | 1072.58 | 43.90   | 0.05     | IQEAGTEVVK              |                 |
|    |              |                                                        |      | 661.60  | 1321.18 | 1319.67 | 86.06   | 2.50E-06 | GYIGADQLGDALK           |                 |
|    |              |                                                        |      | 728.21  | 1454.40 | 1453.70 | 37.29   | 0.18     | AGAGSATLSMAYAGAR        |                 |
|    |              |                                                        |      | 751.99  | 1501.97 | 1502.77 | 100.04  | 1.00E-07 | VEFPADQLSALTGR          |                 |
|    |              |                                                        |      | 1544.85 | 3087.69 | 3088.58 | 95.05   | 1.90E-07 | NSPLVSELSLFDAHTPGVAADL  |                 |
| 35 | gi 41054601  | voltage-dependent anion channel 2 [Danio rerio]        | 62.2 | 283     | 588.19  | 1174.36 | 1173.56 | 42.41    | 0.068                   | SEYGLTFTEK      |
|    |              |                                                        |      | 665.84  | 1329.67 | 1329.66 | 41.35   | 0.077    | RSEYGLTFTEK             |                 |
|    |              |                                                        |      | 779.53  | 1557.05 | 1555.79 | 43.02   | 0.05     | LTFDFFFSPNTGKK          |                 |
|    |              |                                                        |      | 1051.96 | 2101.91 | 2102.15 | 84.24   | 3.20E-06 | VNNTSLVGVGYTQSLRPGIK    |                 |
|    |              |                                                        |      | 1088.43 | 2174.84 | 2174.05 | 117.04  | 1.60E-09 | WNTDNTLGTEINIEDQIAK     |                 |
| 36 | gi 148596963 | spectrin alpha 2 [Danio rerio]                         | 45.1 | 2480    | 625.55  | 1249.08 | 1246.55 | 45.75    | 0.029                   | GEIDAHEDSFK     |
|    |              |                                                        |      | 773.69  | 1545.36 | 1544.77 | 82.66   | 5.60E-06 | HALLEADVAHQDR           |                 |
|    |              |                                                        |      | 787.68  | 1573.34 | 1571.78 | 67.18   | 0.0002   | HQALQAEISGHEPR          |                 |
|    |              |                                                        |      | 537.25  | 1608.71 | 1607.74 | 39.91   | 0.098    | HQAFEAEELHANADR         |                 |
|    |              |                                                        |      | 851.20  | 1700.38 | 1699.88 | 108.80  | 1.20E-08 | KHQALQAEISGHEPR         |                 |
|    |              |                                                        |      | 862.42  | 1722.82 | 1720.86 | 58.01   | 0.0015   | LIQSHPEAVDDIQEK         |                 |
|    |              |                                                        |      | 925.80  | 1849.59 | 1848.86 | 86.05   | 2.20E-06 | KFEFQTDLAAHEER          |                 |
|    |              |                                                        |      | 1010.84 | 2019.66 | 2018.99 | 60.19   | 0.00082  | LQIASDENYKDPSNLQGK      |                 |
|    |              |                                                        |      | 1077.78 | 2153.55 | 2153.10 | 88.67   | 1.10E-06 | ALINADELANDVAGAEALLDR   |                 |
|    |              |                                                        |      | 1108.81 | 2215.60 | 2215.12 | 41.10   | 0.063    | RDELITNWEQIQTATER       |                 |
|    |              |                                                        |      | 740.44  | 2218.30 | 2219.18 | 48.35   | 0.012    | LEAELGAHEPAIQSVLETGKK   |                 |
|    |              |                                                        |      | 1110.70 | 2219.39 | 2219.03 | 79.75   | 8.50E-06 | STDEAGQALLNTGHYASEEVK   |                 |
|    |              |                                                        |      | 792.49  | 2374.44 | 2375.28 | 66.34   | 0.00018  | RLEAELGAHEPAIQSVLETGKK  |                 |
|    |              |                                                        |      | 1246.00 | 2489.99 | 2489.22 | 66.52   | 0.00016  | EKEPIVGSPTYGKDEDSAEALLI |                 |
| 37 | gi 18858335  | bactin1 [Danio rerio]                                  | 55.5 | 375     | 489.44  | 976.86  | 975.44  | 48.58    | 0.016                   | AGFAGDDAPR      |
|    |              |                                                        |      | 566.61  | 1131.20 | 1131.52 | 37.35   | 0.22     | GYSFTTTAER              |                 |
|    |              |                                                        |      | 600.12  | 1198.22 | 1197.70 | 43.75   | 0.045    | AVFPSIVGRPR             |                 |
|    |              |                                                        |      | 895.41  | 1788.80 | 1789.88 | 109.38  | 1.10E-08 | SYELPDGQVITIGNER        |                 |
| 38 | gi 189535893 | PREDICTED: similar to myosin heavy chain [Danio rerio] | 39   | 1938    | 612.98  | 1223.95 | 1223.61 | 40.18    | 0.093                   | TKYETDAIQR      |
|    |              |                                                        |      | 623.38  | 1244.75 | 1244.65 | 82.73   | 6.20E-06 | DLDDLEITLAK             |                 |
|    |              |                                                        |      | 687.67  | 1373.32 | 1372.74 | 51.55   | 0.0072   | KDLDDLEITLAK            |                 |
|    |              |                                                        |      | 761.65  | 1521.28 | 1520.76 | 81.03   | 7.70E-06 | AITDAAMMAEELKK          |                 |
|    |              |                                                        |      | 931.71  | 1861.40 | 1858.88 | 102.14  | 5.50E-08 | LEQQVDDLEGSLEQEK        |                 |
|    |              |                                                        |      | 994.44  | 1986.87 | 1986.97 | 82.62   | 4.70E-06 | LEQQVDDLEGSLEQEKK       |                 |
| 39 | gi 18858587  | elongation factor 1-alpha [Danio rerio]                | 53.5 | 462     | 766.50  | 765.49  | 765.39  | 39.76    | 0.091                   | FEEITK          |
|    |              |                                                        |      | 794.93  | 1587.84 | 1587.87 | 74.02   | 4.00E-05 | THINIVVIGHVDSGK         |                 |
|    |              |                                                        |      | 974.39  | 2920.14 | 2917.55 | 69.01   | 7.70E-05 | EGNASGTTLLDALDAILPPSRPT |                 |
|    |              |                                                        |      | 1016.88 | 3047.61 | 3045.65 | 53.55   | 0.0026   | KEGNASGTTLLDALDAILPPSRP |                 |
| 40 | gi 47086807  | acyl-Coenzyme A dehydrogenase, very long chain [Danio  | 50.7 | 659     | 837.23  | 1672.45 | 1671.94 | 109.89   | 9.80E-09                | AIEQFGAVIEELLLK |

|    |              |                                                            |      |      |         |         |         |        |          |                          |
|----|--------------|------------------------------------------------------------|------|------|---------|---------|---------|--------|----------|--------------------------|
| 41 | gi 162287365 | hemopexin [Danio rerio]                                    | 43.8 | 447  | 1211.60 | 1210.59 | 1210.61 | 42.67  | 0.054    | GHHFLSITGDK              |
|    |              |                                                            |      |      | 1339.66 | 1338.65 | 1338.61 | 63.11  | 0.00047  | FHSDTIESEFK              |
|    |              |                                                            |      |      | 900.94  | 1799.87 | 1800.00 | 65.94  | 0.00024  | VGKPTHLEGYPKPLK          |
|    |              |                                                            |      |      | 721.15  | 2160.41 | 2159.07 | 59.48  | 0.00093  | GKPGGEGHKHELHHGAQLDR     |
| 42 | gi 40786398  | pyruvate kinase, muscle, a [Danio rerio]                   | 49.6 | 532  | 587.69  | 1173.36 | 1170.61 | 37.35  | 0.22     | GDLGIEIPTEK              |
|    |              |                                                            |      |      | 820.11  | 1638.21 | 1635.88 | 86.12  | 2.30E-06 | GVNLPGAAVDLPVAVSEK       |
|    |              |                                                            |      |      | 882.32  | 1762.62 | 1763.98 | 104.58 | 3.40E-08 | KGVNLPGAAVDLPVAVSEK      |
|    |              |                                                            |      |      | 1286.58 | 2571.15 | 2569.21 | 90.02  | 7.00E-07 | GIFPIYNSPSNDVWAEDVDLR    |
| 43 | gi 47085773  | glutamic-oxaloacetic transaminase 1, soluble [Danio rerio] | 51.2 | 410  | 538.75  | 1075.48 | 1075.61 | 66.82  | 0.00025  | KVNLGVGAYR               |
|    |              |                                                            |      |      | 1113.61 | 1112.60 | 1112.61 | 43.19  | 0.053    | IALGEDSPAIK              |
|    |              |                                                            |      |      | 845.28  | 1688.54 | 1687.84 | 84.95  | 3.20E-06 | NIDYVAESIHEAVTK          |
|    |              |                                                            |      |      | 1114.87 | 2227.73 | 2226.03 | 124.06 | 3.30E-10 | NLFAFFDSAYQGFASGDLEK     |
| 44 | gi 189529246 | PREDICTED: hypothetical protein [Danio rerio]              | 71.4 | 119  | 861.05  | 2580.13 | 2579.28 | 45.87  | 0.018    | MIADDHSLNHEYLPIGLPEFR    |
|    |              |                                                            |      |      | 529.66  | 1057.30 | 1056.56 | 77.57  | 2.10E-05 | VAENVQELR                |
|    |              |                                                            |      |      | 599.58  | 1197.14 | 1195.75 | 45.88  | 0.027    | AKLEPVVLSLK              |
|    |              |                                                            |      |      | 1050.75 | 2099.49 | 2100.09 | 79.52  | 9.40E-06 | ELTELGEQVKPHFEGIFK       |
| 45 | gi 48762657  | enolase 1, (alpha) [Danio rerio]                           | 67.6 | 432  | 743.41  | 2227.20 | 2228.18 | 62.96  | 0.00042  | KELTELGEQVKPHFEGIFK      |
|    |              |                                                            |      |      | 573.42  | 1144.82 | 1142.61 | 42.17  | 0.07     | IGAEVYHNLK               |
|    |              |                                                            |      |      | 1504.37 | 3006.73 | 3006.57 | 90.04  | 6.00E-07 | HIADLAGNPDVILPVPFNVINGC  |
|    |              |                                                            |      |      | 589.71  | 1177.41 | 1175.58 | 37.81  | 0.19     | DLFDPVISDR               |
| 46 | gi 18858427  | creatine kinase, muscle a [Danio rerio]                    | 37   | 381  | 755.56  | 1509.10 | 1506.70 | 47.37  | 0.017    | GGDDLDPNYVLSSR           |
|    |              |                                                            |      |      | 836.18  | 1670.35 | 1670.77 | 59.49  | 0.001    | LNYSVDEEYPDLK            |
|    |              |                                                            |      |      | 999.00  | 1995.98 | 1993.93 | 93.47  | 3.80E-07 | GTGGVDTASVGGVFDISNADR    |
|    |              |                                                            |      |      | 1077.13 | 2152.25 | 2150.04 | 41.65  | 0.058    | RGTGGVDTASVGGVFDISNADF   |
| 47 | gi 66773050  | myosin, heavy polypeptide 11, smooth muscle [Danio rerio]  | 43.3 | 1974 | 864.56  | 1727.10 | 1725.94 | 69.31  | 0.00011  | QLLQANPILEAFGNAK         |
|    |              |                                                            |      |      | 586.03  | 1755.05 | 1753.87 | 55.57  | 0.0026   | KQELEEILHEMEAR           |
|    |              |                                                            |      |      | 1000.03 | 1998.04 | 1997.92 | 75.62  | 2.30E-05 | ELEGHISDLQEDLESER        |
|    |              |                                                            |      |      | 1007.31 | 2012.60 | 2012.04 | 100.39 | 7.70E-08 | TLEAELLQLQEDLAAAER       |
| 48 | gi 41054435  | hypothetical protein LOC324244 [Danio rerio]               | 28.6 | 248  | 1066.77 | 2131.52 | 2131.00 | 43.65  | 0.037    | QVEAERDELADELASNASGK     |
|    |              |                                                            |      |      | 1131.02 | 2260.02 | 2259.10 | 76.40  | 1.90E-05 | KQVEAERDELADELASNASGK    |
|    |              |                                                            |      |      | 895.73  | 2684.15 | 2682.37 | 52.91  | 0.0034   | KLEAESNDLQEIQIADLQAQIADL |
|    |              |                                                            |      |      | 586.09  | 1170.17 | 1169.67 | 73.35  | 5.00E-05 | LVILEGELER               |
| 49 | gi 189517521 | PREDICTED: hypothetical protein [Danio rerio]              | 64.3 | 143  | 623.52  | 1245.02 | 1242.65 | 66.73  | 0.00025  | IQLVEEELDR               |
|    |              |                                                            |      |      | 638.09  | 1274.16 | 1271.65 | 65.71  | 0.00029  | EKAEGDVAALNR             |
|    |              |                                                            |      |      | 651.07  | 1300.13 | 1297.76 | 59.34  | 0.0012   | KLVILEGELER              |
|    |              |                                                            |      |      | 589.05  | 1176.08 | 1173.64 | 42.73  | 0.061    | IVMGAITDAVGK             |
| 50 | gi 31044489  | heat shock 60 kD protein 1 [Danio rerio]                   | 54.4 | 575  | 767.47  | 1532.93 | 1532.73 | 89.40  | 1.10E-06 | IASQADSIGQEAMGR          |
|    |              |                                                            |      |      | 1869.06 | 1868.05 | 1867.99 | 101.03 | 7.00E-08 | IDDLLGALSSLSDLHATK       |
|    |              |                                                            |      |      | 978.64  | 1955.26 | 1954.97 | 58.28  | 0.0013   | IYFAHWPDHSLGSAQVK        |
|    |              |                                                            |      |      | 602.58  | 1203.14 | 1200.63 | 46.52  | 0.025    | NAGVEGSLVVEK             |
| 51 | gi 38488731  | natriuretic peptide precursor A [Danio rerio]              | 93.4 | 106  | 984.90  | 1967.78 | 1967.90 | 75.41  | 2.50E-05 | VNEIAEQLESTNSDYEK        |
|    |              |                                                            |      |      | 943.10  | 2826.27 | 2825.53 | 118.08 | 9.90E-10 | TALLDAAGVASLLSTAEAVVTEII |
|    |              |                                                            |      |      | 1026.57 | 2051.12 | 2049.99 | 90.71  | 7.10E-07 | SLLQQFEEALATEEASER       |
|    |              |                                                            |      |      | 1182.38 | 2362.75 | 2362.99 | 76.85  | 1.60E-05 | DREEAAAPGEDSNPSDGFDTQI   |
| 52 | gi 50344894  | tropomyosin 2 (beta) [Danio rerio]                         | 50.7 | 284  | 1248.96 | 2495.90 | 2495.11 | 43.62  | 0.03     | AVDYEDSNTVLEQSPSTSWDF    |
|    |              |                                                            |      |      | 537.56  | 1073.11 | 1072.55 | 55.86  | 0.0032   | LDKENAIDR                |
|    |              |                                                            |      |      | 586.09  | 1170.17 | 1169.67 | 73.35  | 5.00E-05 | LVILEGELER               |
|    |              |                                                            |      |      | 623.52  | 1245.02 | 1242.65 | 66.73  | 0.00025  | IQLVEEELDR               |
| 53 | gi 157787181 | creatine kinase CKM3 [Danio rerio]                         | 46.1 | 380  | 651.07  | 1300.13 | 1297.76 | 59.34  | 0.0012   | KLVILEGELER              |
|    |              |                                                            |      |      | 708.64  | 1415.26 | 1415.73 | 37.18  | 0.2      | DAQEKLEQAEKK             |
|    |              |                                                            |      |      | 755.56  | 1509.10 | 1506.70 | 47.37  | 0.017    | GGDDLDPNYVLSSR           |
|    |              |                                                            |      |      | 999.00  | 1995.98 | 1993.93 | 93.47  | 3.80E-07 | GTGGVDTASVGGVFDISNADR    |

|    |              |                                                                 |      |      |         |         |         |        |          |                          |
|----|--------------|-----------------------------------------------------------------|------|------|---------|---------|---------|--------|----------|--------------------------|
| 54 | gi 47086021  | aldolase a, fructose-bisphosphate, b [Danio rerio]              | 48.6 | 364  | 1077.13 | 2152.25 | 2150.04 | 41.65  | 0.058    | RGTGGVDTASVGGVFDISNADF   |
|    |              |                                                                 |      |      | 660.17  | 1318.33 | 1317.68 | 104.23 | 4.00E-08 | GILAADESTGSAK            |
|    |              |                                                                 |      |      | 776.51  | 1551.00 | 1550.70 | 71.66  | 6.60E-05 | FQSINAENTEENR            |
|    |              |                                                                 |      |      | 932.72  | 1863.42 | 1862.90 | 38.48  | 0.13     | RFQSINAENTEENRR          |
|    |              |                                                                 |      |      | 1055.50 | 2108.98 | 2107.16 | 65.57  | 0.00023  | ITPTTPSNLAIENANVLAR      |
|    |              |                                                                 |      |      | 1175.04 | 2348.06 | 2347.17 | 73.65  | 3.30E-05 | GVVPLAGTNGETTTQGLDGLYE   |
| 55 | gi 117606264 | sarcalumenin [Danio rerio]                                      | 45.2 | 482  | 869.43  | 1736.85 | 1735.95 | 50.99  | 0.0076   | AITHELPSLLGSINSGK        |
|    |              |                                                                 |      |      | 1036.37 | 2070.72 | 2069.08 | 87.62  | 1.50E-06 | REEISLLEDLNQVIENR        |
| 56 | gi 47086523  | ictacalcin [Danio rerio]                                        | 62.1 | 95   | 696.65  | 1391.29 | 1390.73 | 90.39  | 9.70E-07 | ELLSAELGDIFGK            |
| 57 | gi 50344790  | hypothetical protein LOC415158 [Danio rerio]                    | 61.5 | 104  | 608.49  | 1214.96 | 1214.66 | 57.95  | 0.0019   | VGPNLWGLFGR              |
|    |              |                                                                 |      |      | 744.56  | 1487.11 | 1487.65 | 83.55  | 4.50E-06 | TGQAEGFSYTDANK           |
|    |              |                                                                 |      |      | 808.82  | 1615.63 | 1615.75 | 107.78 | 1.60E-08 | KTGQAEGFSYTDANK          |
|    |              |                                                                 |      |      | 1061.98 | 2121.94 | 2121.05 | 45.63  | 0.022    | GIVWGEDTLMEYLENPKK       |
| 58 | gi 40538764  | ceruloplasmin [Danio rerio]                                     | 30.7 | 1087 | 806.08  | 1610.15 | 1609.72 | 91.54  | 6.70E-07 | SVNKEDADFQESNK           |
|    |              |                                                                 |      |      | 828.99  | 1655.97 | 1654.78 | 85.47  | 2.70E-06 | LVDDIVSDTFFDNR           |
|    |              |                                                                 |      |      | 859.48  | 2575.40 | 2573.23 | 60.57  | 0.00061  | VSWHLSGLGSETDIHGLYFEGN   |
| 59 | gi 189535920 | PREDICTED: similar to Filamin-A (Alpha-filamin) (Filamir        | 51.5 | 2523 | 823.47  | 1644.92 | 1645.89 | 81.60  | 6.80E-06 | VHGPGLQSGITNKPNK         |
|    |              |                                                                 |      |      | 886.49  | 1770.96 | 1770.93 | 63.28  | 0.00044  | SGVELNKPTHFTVNTK         |
|    |              |                                                                 |      |      | 901.26  | 1800.50 | 1799.96 | 62.58  | 0.00052  | VAKPDITDNKDGTVTVK        |
|    |              |                                                                 |      |      | 1115.87 | 2229.73 | 2228.05 | 63.53  | 0.00036  | DGSSGVSYIVQEPGDYEVSİK    |
|    |              |                                                                 |      |      | 1206.85 | 2411.68 | 2411.15 | 89.21  | 9.10E-07 | EGPYSINVLVYADEEIPQSPYK   |
| 60 | gi 41282154  | aldolase a, fructose-bisphosphate [Danio rerio]                 | 45.3 | 364  | 660.17  | 1318.33 | 1317.68 | 104.23 | 4.00E-08 | GILAADESTGSAK            |
|    |              |                                                                 |      |      | 1427.77 | 1426.76 | 1426.72 | 45.39  | 0.028    | PHAYPFLTPEQK             |
|    |              |                                                                 |      |      | 776.51  | 1551.00 | 1550.70 | 71.66  | 6.60E-05 | FQSINAENTEENR            |
|    |              |                                                                 |      |      | 932.72  | 1863.42 | 1862.90 | 38.48  | 0.13     | RFQSINAENTEENRR          |
|    |              |                                                                 |      |      | 1175.04 | 2348.06 | 2347.17 | 73.65  | 3.30E-05 | GVVPLAGTNGETTTQGLDGLYE   |
| 61 | gi 41393131  | dihydrolipoamide S-succinyltransferase [Danio rerio]            | 38.4 | 458  | 1075.38 | 2148.75 | 2147.07 | 114.26 | 3.20E-09 | AAAYALTDQPAVNAVIDDTTK    |
| 62 | gi 41152342  | creatine kinase, mitochondrial 2 (sarcomeric) [Danio rerio]     | 37.3 | 413  | 1040.87 | 2079.72 | 2079.97 | 91.39  | 6.20E-07 | GTGGVDTAAVGDTFDISNLDR    |
|    |              |                                                                 |      |      | 1119.31 | 2236.61 | 2236.07 | 52.22  | 0.0048   | RGTGGVDTAAVGDTFDISNLDR   |
| 63 | gi 41054193  | hypothetical protein LOC327506 [Danio rerio]                    | 51.1 | 178  | 1040.87 | 2079.72 | 2079.97 | 91.39  | 6.20E-07 | GTGGVDTAAVGDTFDISNLDR    |
|    |              |                                                                 |      |      | 1119.31 | 2236.61 | 2236.07 | 52.22  | 0.0048   | RGTGGVDTAAVGDTFDISNLDR   |
| 64 | gi 41053939  | malate dehydrogenase 1a, NAD (soluble) [Danio rerio]            | 50.2 | 305  | 662.59  | 1323.17 | 1320.67 | 70.62  | 8.50E-05 | VVDGLSINDFSR             |
|    |              |                                                                 |      |      | 730.42  | 1458.82 | 1459.79 | 53.60  | 0.0044   | EVIPTDKVEVGFK            |
|    |              |                                                                 |      |      | 878.99  | 2633.93 | 2631.29 | 81.11  | 5.40E-06 | NVTIWGNHSSSTQYPDVHHAIVTI |
| 65 | gi 18858959  | lactate dehydrogenase A4 [Danio rerio]                          | 46.8 | 333  | 596.12  | 1190.22 | 1188.61 | 84.43  | 4.20E-06 | VIGSGTNLDSAR             |
|    |              |                                                                 |      |      | 628.45  | 1254.88 | 1252.64 | 54.64  | 0.0036   | MVVDSAYEVIK              |
|    |              |                                                                 |      |      | 756.18  | 1510.35 | 1509.77 | 73.74  | 4.00E-05 | IVADKDYSVTANSK           |
| 66 | gi 47086069  | hypothetical protein LOC406529 [Danio rerio]                    | 48.8 | 283  | 930.98  | 1859.95 | 1858.82 | 94.89  | 2.90E-07 | SQSGVEFTTGGSSNTDTGK      |
|    |              |                                                                 |      |      | 1030.85 | 2059.68 | 2058.12 | 82.00  | 5.30E-06 | VNNASLVGVGYTQSLRPGVK     |
| 67 | gi 50539808  | hypothetical protein LOC436647 [Danio rerio]                    | 48.4 | 525  | 908.92  | 1815.83 | 1815.92 | 76.41  | 2.10E-05 | ENTLNQLVGAAGAAGQR        |
|    |              |                                                                 |      |      | 967.82  | 1933.62 | 1932.99 | 63.67  | 0.00037  | VNAGDQPGADVGLISPQAK      |
|    |              |                                                                 |      |      | 1005.87 | 2009.73 | 2009.00 | 85.54  | 2.30E-06 | SSQWLDIHNPATSEVIGR       |
| 68 | gi 47087061  | glutamic-oxaloacetic transaminase 2a, mitochondrial (aspartate) | 58.9 | 428  | 555.50  | 1108.99 | 1107.59 | 39.28  | 0.12     | KMNLGVGAYR               |
|    |              |                                                                 |      |      | 705.68  | 1409.35 | 1408.72 | 46.27  | 0.023    | EYLPIGGLADFSK            |
|    |              |                                                                 |      |      | 724.76  | 1447.51 | 1445.81 | 72.14  | 6.30E-05 | IAATILNTPELYK            |
|    |              |                                                                 |      |      | 946.71  | 1891.41 | 1893.02 | 95.60  | 2.50E-07 | KLDKEYLPIGGLADFSK        |
|    |              |                                                                 |      |      | 666.36  | 1996.04 | 1994.03 | 36.92  | 0.17     | YFIEQGHNILLSQSFAK        |
|    |              |                                                                 |      |      | 784.38  | 2350.11 | 2350.26 | 58.13  | 0.0012   | ISVAGVTSANVEYLAAHAIHAVTK |
| 69 | gi 68362804  | PREDICTED: similar to Histone H4 replacement CG3379             | 68.9 | 103  | 1134.59 | 1133.58 | 1133.54 | 39.08  | 0.14     | DAVTYTEHAK               |
|    |              |                                                                 |      |      | 591.69  | 1181.36 | 1179.61 | 63.27  | 0.00048  | ISGLIYEETR               |
|    |              |                                                                 |      |      | 657.23  | 1312.44 | 1309.70 | 58.02  | 0.0016   | TVTAMDVVYALK             |
|    |              |                                                                 |      |      | 664.19  | 1326.36 | 1324.75 | 43.50  | 0.045    | DNIQGITKPAIR             |

|    |              |                                                             |      |      |         |         |         |        |          |                          |
|----|--------------|-------------------------------------------------------------|------|------|---------|---------|---------|--------|----------|--------------------------|
| 70 | gi 41053873  | succinate dehydrogenase complex, subunit A, flavoprotei     | 52.2 | 661  | 666.56  | 1331.11 | 1329.65 | 45.28  | 0.031    | GEGGILINSEGER            |
|    |              |                                                             |      |      | 1474.80 | 1473.79 | 1473.75 | 85.53  | 2.80E-06 | KHTLSYVDPETGK            |
|    |              |                                                             |      |      | 1055.70 | 2109.39 | 2109.13 | 43.11  | 0.041    | DHVHLQLHHLPPQQLAAR       |
|    |              |                                                             |      |      | 861.14  | 2580.40 | 2582.14 | 47.38  | 0.013    | DGQDHVVPGLYACGEAGCASV    |
|    |              |                                                             |      |      | 888.17  | 2661.47 | 2662.42 | 60.65  | 0.0006   | GVGPKDHDVHLQLHHLPPQQLA   |
| 71 | gi 58801524  | LIM domain containing preferred translocation partner in    | 51.4 | 556  | 1097.90 | 2193.79 | 2193.06 | 52.39  | 0.0047   | AEP SHHPAPTPSQQGYQPAPPK  |
|    |              |                                                             |      |      | 1397.62 | 2793.23 | 2793.39 | 108.68 | 9.10E-09 | SSLDAEIDSLTSILADLESSSPYK |
| 72 | gi 23308625  | fatty acid binding protein 3, muscle and heart [Danio reric | 76.7 | 133  | 749.12  | 1496.23 | 1496.63 | 92.69  | 5.10E-07 | LGEEFDETTADDR            |
|    |              |                                                             |      |      | 813.60  | 1625.18 | 1624.72 | 56.89  | 0.002    | LGEEFDETTADDRK           |
|    |              |                                                             |      |      | 1081.42 | 2160.82 | 2160.13 | 62.50  | 0.00047  | EVSDNNLTTLTLGDIVSTR      |
| 73 | gi 189516653 | PREDICTED: myosin, heavy chain 9, non-muscle like-1,        | 39.2 | 1754 | 569.07  | 1136.13 | 1135.60 | 36.18  | 0.25     | VLQEQGTHPK               |
|    |              |                                                             |      |      | 613.09  | 1224.17 | 1222.63 | 64.72  | 0.00033  | AGVLAHLEER               |
|    |              |                                                             |      |      | 575.27  | 1722.79 | 1721.89 | 60.94  | 0.00079  | KQELEEILHDLEAR           |
|    |              |                                                             |      |      | 864.56  | 1727.10 | 1725.94 | 69.31  | 0.00011  | QLLQANPILEAFGNAK         |
|    |              |                                                             |      |      | 893.88  | 2678.62 | 2678.38 | 79.43  | 7.80E-06 | KLEGDSTELHDQIAELQAQIAEL  |
| 74 | gi 66773138  | cytochrome c oxidase subunit Vaa [Danio rerio]              | 95   | 141  | 487.46  | 972.90  | 972.52  | 66.23  | 0.0003   | LDDLASAIR                |
|    |              |                                                             |      |      | 487.46  | 1459.36 | 1458.77 | 41.65  | 0.069    | ACRRLDDLASAIR            |
|    |              |                                                             |      |      | 1659.34 | 3316.67 | 3313.73 | 65.34  | 0.00016  | EIYPYVIQELRPTLDELGIATPEE |
|    |              |                                                             |      |      | 1694.78 | 3387.54 | 3384.77 | 59.62  | 0.00055  | EIYPYVIQELRPTLDELGIATPEE |
| 75 | gi 189535578 | PREDICTED: fetuin B [Danio rerio]                           | 45   | 498  | 1053.80 | 2105.59 | 2104.92 | 74.74  | 2.90E-05 | DETHEHDHEIVLDHDHK        |
|    |              |                                                             |      |      | 1117.31 | 2232.61 | 2233.01 | 77.52  | 1.40E-05 | KDETHEHDHEIVLDHDHK       |
|    |              |                                                             |      |      | 797.00  | 2387.96 | 2389.01 | 42.38  | 0.043    | AHEHGQDEWEHQHHQYGHK      |
| 76 | gi 41055718  | fumarate hydratase precursor [Danio rerio]                  | 52.7 | 509  | 829.24  | 1656.46 | 1655.84 | 48.58  | 0.013    | LGSKDPVHPNDHVNK          |
|    |              |                                                             |      |      | 719.09  | 2154.25 | 2153.18 | 65.75  | 0.00022  | EVHEVLLPGLQTLHDALAAK     |
|    |              |                                                             |      |      | 1251.94 | 2501.87 | 2501.26 | 85.96  | 1.80E-06 | THTQDAVPLSLGQEFGGYVQQV   |
| 77 | gi 47550793  | nicotinamide nucleotide transhydrogenase [Danio rerio]      | 42.6 | 1079 | 1270.68 | 1269.67 | 1269.68 | 49.62  | 0.011    | SLGAEPLEVDIK             |
|    |              |                                                             |      |      | 707.79  | 1413.56 | 1412.74 | 41.33  | 0.073    | GVIHVGYTDIPSR            |
|    |              |                                                             |      |      | 789.81  | 1577.60 | 1577.77 | 66.87  | 0.0002   | QGFNVVVEGAGESAK          |
|    |              |                                                             |      |      | 922.62  | 2764.83 | 2763.39 | 72.03  | 4.20E-05 | DGSVVVDLAAEAGGNIETTVP    |
| 78 | gi 57222259  | talin 1 [Danio rerio]                                       | 50.5 | 2538 | 1526.50 | 3050.98 | 3050.51 | 110.47 | 5.30E-09 | GTEWVDPEDPTVIAENELLGAA   |
|    |              |                                                             |      |      | 1588.48 | 3174.95 | 3174.57 | 84.08  | 2.30E-06 | EAVDDLGSTLAEVASAAGAVGC   |
| 79 | gi 18858281  | apolipoprotein A-I [Danio rerio]                            | 54.2 | 262  | 585.45  | 1168.88 | 1166.55 | 57.61  | 0.0018   | AFESNIEETK               |
|    |              |                                                             |      |      | 822.74  | 1643.47 | 1643.73 | 81.96  | 6.20E-06 | ALDNLGTDYEQYK            |
|    |              |                                                             |      |      | 912.03  | 1822.04 | 1821.93 | 58.57  | 0.0013   | EKLEPVFQEYSALNR          |
|    |              |                                                             |      |      | 1580.96 | 3159.90 | 3159.53 | 45.88  | 0.015    | LQEYAQTTSQALTPYAETISTQL  |
| 80 | gi 56693297  | hypothetical protein LOC494070 [Danio rerio]                | 66.5 | 182  | 952.64  | 1903.26 | 1902.91 | 92.17  | 5.30E-07 | AKEELEQELADKEDEK         |
| 81 | gi 56090150  | NADH dehydrogenase (ubiquinone) Fe-S protein 1 [Danio       | 49.5 | 731  | 805.71  | 1609.40 | 1607.78 | 75.77  | 2.50E-05 | FASEVAGVEDLGTTGR         |
|    |              |                                                             |      |      | 1571.20 | 3140.38 | 3139.56 | 89.52  | 6.30E-07 | DSFIVYQGHGVDGAPIADVILP   |
| 82 | gi 189517523 | PREDICTED: hypothetical protein [Danio rerio]               | 97.3 | 147  | 1060.96 | 1059.95 | 1060.52 | 40.46  | 0.11     | LNVDPDNFK                |
|    |              |                                                             |      |      | 714.17  | 1426.32 | 1424.76 | 90.93  | 7.90E-07 | INVDEIGPQTLAR            |
| 83 | gi 47777298  | inner membrane protein, mitochondrial (mitofilin) [Danio r  | 46.4 | 757  | 740.20  | 1478.39 | 1478.76 | 78.83  | 1.30E-05 | IVSQYSELVNEAK            |
|    |              |                                                             |      |      | 978.64  | 1955.26 | 1955.09 | 67.25  | 0.00016  | KPETVKPLQISSLSEATK       |
|    |              |                                                             |      |      | 1065.82 | 2129.63 | 2130.11 | 49.26  | 0.01     | AELDALAALTAGLEETLGSSAK   |
| 84 | gi 189522028 | PREDICTED: similar to myomesin [Danio rerio]                | 64   | 923  | 1508.67 | 1507.66 | 1507.73 | 82.72  | 5.10E-06 | FKGEFDESLPSR             |
|    |              |                                                             |      |      | 1259.63 | 3775.87 | 3772.95 | 53.75  | 0.0018   | GASAPWTGQIIVTEEEPVEGVV   |
|    |              |                                                             |      |      | 1301.49 | 3901.45 | 3901.05 | 67.56  | 7.10E-05 | KGASAPWTGQIIVTEEEPVEGVV  |
| 85 | gi 41055728  | ATPase, Ca++ transporting, cardiac muscle, slow twitch ;    | 45.5 | 996  | 1072.60 | 1071.59 | 1071.56 | 41.86  | 0.08     | NAENAIEALK               |
|    |              |                                                             |      |      | 732.73  | 1463.44 | 1463.67 | 45.15  | 0.03     | IRDEMASTEQER             |
|    |              |                                                             |      |      | 1525.55 | 1524.54 | 1524.80 | 83.44  | 4.30E-06 | DIVPGDIVEVAVGDK          |
|    |              |                                                             |      |      | 788.74  | 1575.47 | 1573.86 | 86.36  | 2.40E-06 | VDQSILTGESVSVIK          |
| 86 | gi 71892474  | ATPase, Ca++ transporting, cardiac muscle, slow twitch ;    | 41.4 | 1035 | 1072.60 | 1071.59 | 1071.56 | 41.86  | 0.08     | NAENAIEALK               |
|    |              |                                                             |      |      | 732.73  | 1463.44 | 1463.67 | 45.15  | 0.03     | IRDEMASTEQER             |

|     |              |                                                          |      |         |         |         |         |          |                           |                         |
|-----|--------------|----------------------------------------------------------|------|---------|---------|---------|---------|----------|---------------------------|-------------------------|
|     |              |                                                          |      | 1525.55 | 1524.54 | 1524.80 | 83.44   | 4.30E-06 | DIVPGDIVEVAVGDK           |                         |
|     |              |                                                          |      | 788.74  | 1575.47 | 1573.86 | 86.36   | 2.40E-06 | VDQSILTGESVSVIK           |                         |
| 87  | gi 189530625 | PREDICTED: similar to spectrin repeat containing, nucle: | 37.3 | 8621    | 550.57  | 1099.13 | 1097.66 | 68.83    | 0.00015                   | QLADAIKLR               |
| 88  | gi 113195582 | hypothetical protein LOC556489 [Danio rerio]             | 54.4 | 226     | 724.23  | 1446.44 | 1445.78 | 47.73    | 0.017                     | VIFEAEETKPGVK           |
|     |              |                                                          |      | 881.46  | 2641.36 | 2641.29 | 69.67   | 7.40E-05 | SPDPAAVEHKPEESKPEESKPE    |                         |
|     |              |                                                          |      | 1421.57 | 2841.12 | 2840.42 | 49.82   | 0.0068   | AKSPDPAAVEHKPEESKPEESK    |                         |
| 89  | gi 47271422  | triosephosphate isomerase 1b [Danio rerio]               | 78.6 | 248     | 695.75  | 1389.49 | 1388.71 | 69.76    | 0.00011                   | SIEELANTLNSAK           |
|     |              |                                                          |      | 1458.82 | 1457.81 | 1457.72 | 75.26   | 3.00E-05 | HVFGESDELIGQK             |                         |
|     |              |                                                          |      | 808.43  | 1614.84 | 1613.82 | 57.16   | 0.0019   | RHVFGEDELIGQK             |                         |
|     |              |                                                          |      | 812.06  | 2433.15 | 2431.30 | 52.48   | 0.0041   | DLDGFLVGGASLKPEFIDIINAK   |                         |
| 90  | gi 68433600  | PREDICTED: similar to LOC495046 protein isoform 1 [D:    | 35.9 | 1056    | 1072.60 | 1071.59 | 1071.56 | 41.86    | 0.08                      | NAENAIEALK              |
|     |              |                                                          |      | 1525.55 | 1524.54 | 1524.80 | 83.44   | 4.30E-06 | DIVPGDIVEVAVGDK           |                         |
|     |              |                                                          |      | 788.74  | 1575.47 | 1573.86 | 86.36   | 2.40E-06 | VDQSILTGESVSVLK           |                         |
| 91  | gi 50540358  | hypothetical protein LOC436918 [Danio rerio]             | 51.5 | 357     | 1252.70 | 1251.69 | 1251.62 | 69.12    | 0.00012                   | LHAVNDAEVER             |
|     |              |                                                          |      | 1111.50 | 2220.99 | 2220.13 | 92.38   | 4.70E-07 | NAITVEMYNELIEALELAGK      |                         |
| 92  | gi 41152400  | peptidylprolyl isomerase A, like [Danio rerio]           | 70.7 | 164     | 686.63  | 1371.24 | 1370.73 | 82.70    | 5.50E-06                  | VVDGLDVVDAIEK           |
| 93  | gi 52219194  | fatty acid binding protein 11 [Danio rerio]              | 50   | 134     | 769.06  | 1536.10 | 1535.67 | 89.09    | 1.20E-06                  | LNEPFEETTADDR           |
|     |              |                                                          |      | 833.41  | 1664.80 | 1663.77 | 68.69   | 0.00013  | LNEPFEETTADDRK            |                         |
| 94  | gi 114326248 | elastin b [Danio rerio]                                  | 22.3 | 2054    | 880.55  | 1759.08 | 1759.92 | 38.98    | 0.12                      | SYGGAGSLGAGGILPGTGIR    |
|     |              |                                                          |      | 887.73  | 1773.45 | 1772.86 | 55.25   | 0.0029   | SYGGAGALGGAGQGGIGGGPGC    |                         |
|     |              |                                                          |      | 1647.81 | 4940.40 | 4937.47 | 122.27  | 1.50E-10 | LGVGPGGAGGIGGGLGVGPGG     |                         |
| 95  | gi 40254659  | bactin2 [Danio rerio]                                    | 53.3 | 375     | 489.44  | 976.86  | 975.44  | 48.58    | 0.016                     | AGFAGDDAPR              |
|     |              |                                                          |      | 566.61  | 1131.20 | 1131.52 | 37.35   | 0.22     | GYSFTTTAER                |                         |
|     |              |                                                          |      | 600.12  | 1198.22 | 1197.70 | 43.75   | 0.045    | AVFPSIVGRPR               |                         |
|     |              |                                                          |      | 977.46  | 1952.91 | 1953.06 | 79.89   | 8.60E-06 | VAPPEHPVLLTEAPLNPK        |                         |
| 96  | gi 51571925  | hypothetical protein LOC445486 [Danio rerio]             | 42.3 | 194     | 902.32  | 1802.62 | 1800.95 | 39.68    | 0.1                       | INSELPVDEVFAIVEK        |
|     |              |                                                          |      | 966.43  | 1930.84 | 1929.05 | 82.64   | 4.70E-06 | KINSELPVDEVFAIVEK         |                         |
| 97  | gi 71834286  | hypothetical protein LOC321166 [Danio rerio]             | 40.3 | 3730    | 638.85  | 1275.69 | 1273.71 | 40.14    | 0.11                      | SKVEEILSELK             |
|     |              |                                                          |      | 967.82  | 1933.62 | 1931.96 | 84.94   | 2.80E-06 | TLHLDDSIDSVHPIQDK         |                         |
|     |              |                                                          |      | 1036.40 | 3106.17 | 3105.49 | 46.59   | 0.013    | YDAEEIEAEVSSDVTTEIHNIITTI |                         |
| 98  | gi 50540008  | zgc:92882 [Danio rerio]                                  | 45.2 | 334     | 474.55  | 947.09  | 946.60  | 38.80    | 0.16                      | HIIPQIVK                |
|     |              |                                                          |      | 596.12  | 1190.22 | 1188.61 | 84.43   | 4.20E-06 | VIGSGTNLDSAR              |                         |
| 99  | gi 189537196 | PREDICTED: similar to L-lactate dehydrogenase B chain    | 33.7 | 285     | 474.55  | 947.09  | 946.60  | 38.80    | 0.16                      |                         |
|     |              |                                                          |      | 596.12  | 1190.22 | 1188.61 | 84.43   | 4.20E-06 |                           |                         |
| 100 | gi 189520789 | PREDICTED: si:ch211-239j9.2 [Danio rerio]                | 68.4 | 76      | 675.31  | 1348.61 | 1348.63 | 71.30    | 7.50E-05                  | EAGIFESARPSGE           |
|     |              |                                                          |      | 787.29  | 1572.56 | 1571.68 | 64.31   | 0.00038  | AYADFYTQYDSTK             |                         |
| 101 | gi 136429    | Trypsin precursor                                        | 75.4 | 232     | 737.53  | 2209.57 | 2210.10 | 85.13    | 2.50E-06                  | LGEHNIDVLEGNEQFINAAK    |
| 102 | gi 160333682 | heat shock protein 8 [Danio rerio]                       | 50.8 | 649     | 830.76  | 1659.50 | 1658.89 | 82.21    | 5.90E-06                  | IINEPTAAAIAYGLDK        |
|     |              |                                                          |      | 847.03  | 1692.05 | 1690.72 | 44.48   | 0.035    | STAGDTHLGGEDFDNR          |                         |
|     |              |                                                          |      | 575.34  | 1722.98 | 1722.86 | 38.67   | 0.13     | HWPFNVINDNSRPK            |                         |
|     |              |                                                          |      | 887.36  | 1772.70 | 1772.81 | 39.80   | 0.1      | NQTAEREEFEHQK             |                         |
|     |              |                                                          |      | 1131.58 | 2261.14 | 2259.14 | 47.52   | 0.014    | SINPDEAVAYGAAVQAAILSGDK   |                         |
| 103 | gi 166795887 | vitellogenin 1 [Danio rerio]                             | 42.6 | 1362    | 481.12  | 960.22  | 959.47  | 36.63    | 0.28                      | LEVEWER                 |
|     |              |                                                          |      | 587.65  | 1173.29 | 1172.62 | 56.41   | 0.0027   | LEFEVQVGPR                |                         |
|     |              |                                                          |      | 590.06  | 1178.11 | 1176.64 | 48.71   | 0.015    | QTLAFVEIEK                |                         |
|     |              |                                                          |      | 644.61  | 1287.21 | 1286.66 | 65.73   | 0.00029  | AEAGVLGEFPAAR             |                         |
|     |              |                                                          |      | 692.52  | 1383.03 | 1381.78 | 54.77   | 0.0034   | ISDAPAQIVEVLK             |                         |
| 104 | gi 47086247  | proto galectin Gal1-L2 [Danio rerio]                     | 32.1 | 134     | 892.64  | 2674.90 | 2675.32 | 93.26    | 3.20E-07                  | ITFTNEEFLVTLPDGSEIHFPNR |
| 105 | gi 50345022  | small muscle protein, X-linked [Danio rerio]             | 61.4 | 83      | 1037.75 | 2073.48 | 2072.97 | 83.71    | 3.70E-06                  | REDTVETEEVSPVTPEEK      |
|     |              |                                                          |      | 1115.86 | 2229.71 | 2229.08 | 60.21   | 0.00078  | RREDTVETEEVSPVTPEEK       |                         |
| 106 | gi 8395615   | cytochrome c oxidase subunit II [Danio rerio]            | 26.5 | 230     | 442.31  | 882.61  | 882.46  | 41.11    | 0.073                     | LLETDHR                 |
|     |              |                                                          |      | 1068.52 | 2135.02 | 2133.18 | 60.00   | 0.00083  | ILVSAEDVLHSAVPSLGIK       |                         |

|     |              |                                                                                  |      |      |         |         |         |        |          |                          |
|-----|--------------|----------------------------------------------------------------------------------|------|------|---------|---------|---------|--------|----------|--------------------------|
| 107 | gi 18859505  | alpha-tropomyosin [Danio rerio]                                                  | 44.4 | 284  | 537.56  | 1073.11 | 1072.55 | 55.86  | 0.0032   | LDKENALDR                |
|     |              |                                                                                  |      |      | 623.52  | 1245.02 | 1242.65 | 66.73  | 0.00025  | IQLVEEELDR               |
|     |              |                                                                                  |      |      | 770.15  | 2307.42 | 2307.18 | 51.55  | 0.0055   | SVAKLEKTIDDLEDELYAQK     |
| 108 | gi 41151982  | major vault protein [Danio rerio]                                                | 45.3 | 863  | 1069.52 | 2137.03 | 2137.12 | 86.26  | 1.90E-06 | IPPHHYIHVLDQNTNIAR       |
|     |              |                                                                                  |      |      | 1353.45 | 2704.89 | 2704.43 | 36.37  | 0.16     | STLITDGSSPINLFTTANGLLGS  |
| 109 | gi 147906978 | hypothetical protein LOC492719 [Danio rerio]                                     | 59.9 | 603  | 1359.62 | 1358.61 | 1358.64 | 59.74  | 0.0011   | EEFAHDHPIHK              |
|     |              |                                                                                  |      |      | 1005.22 | 3012.64 | 3013.43 | 105.12 | 1.90E-08 | HISDDIFLTTAEAISEMVTTEHLA |
| 110 | gi 18858299  | ATPase, Na+/K+ transporting, alpha 1a.3 polypeptide [Danio rerio]                | 44.2 | 1024 | 877.83  | 1753.65 | 1751.85 | 85.52  | 2.70E-06 | DAFQNAVYELGGLGER         |
|     |              |                                                                                  |      |      | 906.81  | 1811.60 | 1810.94 | 74.81  | 3.00E-05 | QGAIVAVTGDGVNDSPALK      |
| 111 | gi 18858295  | ATPase, Na+/K+ transporting, alpha 1 polypeptide [Danio rerio]                   | 42.6 | 1028 | 877.83  | 1753.65 | 1751.85 | 85.52  | 2.70E-06 |                          |
|     |              |                                                                                  |      |      | 906.81  | 1811.60 | 1810.94 | 74.81  | 3.00E-05 |                          |
| 112 | gi 32308153  | annexin A2a [Danio rerio]                                                        | 57.6 | 337  | 633.21  | 1264.40 | 1263.66 | 53.64  | 0.0044   | SLHQTIAEHTK              |
|     |              |                                                                                  |      |      | 723.17  | 1444.33 | 1443.78 | 90.36  | 9.50E-07 | GVDEQTIIDILTK            |
| 113 | gi 189526598 | PREDICTED: similar to COASTER [Danio rerio]                                      | 40.5 | 916  | 657.65  | 1313.29 | 1312.78 | 53.16  | 0.005    | QAVALSLEKEARK            |
| 114 | gi 189540222 | PREDICTED: similar to myosin, heavy polypeptide 2, fast [Danio rerio]            | 48.3 | 950  | 745.59  | 1489.17 | 1488.74 | 49.21  | 0.012    | ENQSVLITGESGAGK          |
|     |              |                                                                                  |      |      | 1183.60 | 2365.19 | 2366.12 | 87.76  | 1.30E-06 | LQQFFNHHMFVLEQEEYK       |
| 115 | gi 189540214 | PREDICTED: similar to myosin heavy chain, partial [Danio rerio]                  | 51.2 | 809  | 745.59  | 1489.17 | 1488.74 | 49.21  | 0.012    | ENQSVLITGESGAGK          |
|     |              |                                                                                  |      |      | 1183.60 | 2365.19 | 2366.12 | 87.76  | 1.30E-06 | LQQFFNHHMFVLEQEEYK       |
| 116 | gi 46358344  | isocitrate dehydrogenase 3 (NAD+) alpha [Danio rerio]                            | 45.8 | 365  | 1251.43 | 2500.84 | 2501.23 | 114.90 | 2.30E-09 | ENTEGEYSGLIEHVIVDGVVQSIK |
| 117 | gi 68448513  | hypothetical protein LOC574004 [Danio rerio]                                     | 37.4 | 187  | 968.51  | 967.50  | 966.55  | 60.55  | 0.00083  | HVLATLGEK                |
|     |              |                                                                                  |      |      | 757.12  | 1512.23 | 1511.69 | 84.28  | 3.60E-06 | DQGTFFDFVEGLR            |
| 118 | gi 156713467 | vitellogenin 7 [Danio rerio]                                                     | 56   | 1358 | 481.12  | 960.22  | 959.47  | 36.63  | 0.28     | LEVEWER                  |
|     |              |                                                                                  |      |      | 587.65  | 1173.29 | 1172.62 | 56.41  | 0.0027   | LEFEVQVGPR               |
|     |              |                                                                                  |      |      | 590.06  | 1178.11 | 1176.64 | 48.71  | 0.015    | QTLAFVEIEK               |
|     |              |                                                                                  |      |      | 644.61  | 1287.21 | 1286.66 | 65.73  | 0.00029  | AEAGVLGEFPAAR            |
| 119 | gi 18859423  | spectrin, beta, erythrocytic [Danio rerio]                                       | 31.3 | 2357 | 669.07  | 1336.13 | 1335.74 | 59.62  | 0.0011   | HLLEVEDLLQK              |
|     |              |                                                                                  |      |      | 713.72  | 1425.42 | 1425.74 | 42.84  | 0.05     | HRPDLVDYGNLK             |
|     |              |                                                                                  |      |      | 945.14  | 1888.27 | 1887.93 | 93.31  | 4.20E-07 | KKHDAIETDIAAYEER         |
| 120 | gi 119943123 | apolipoprotein A-IV [Danio rerio]                                                | 57.3 | 255  | 903.92  | 1805.82 | 1802.94 | 78.36  | 1.40E-05 | AQIVQQSLTPYAEDLK         |
| 121 | gi 54400442  | hypothetical protein LOC449795 [Danio rerio]                                     | 65.3 | 202  | 999.01  | 2993.99 | 2996.41 | 51.77  | 0.004    | TLAAGSHAEHDGQPYCHKPCY/   |
|     |              |                                                                                  |      |      | 1008.93 | 3023.75 | 3023.42 | 65.34  | 0.00017  | TLNPGGHAHDGKPYCHKPCY/    |
| 122 | gi 189531406 | PREDICTED: similar to nicotinamide nucleotide transhydrogenase [Danio rerio]     | 39.8 | 679  | 567.07  | 1132.13 | 1130.59 | 54.85  | 0.0038   | SVAELEAEKR               |
|     |              |                                                                                  |      |      | 649.69  | 1297.36 | 1296.77 | 64.75  | 0.00033  | VSVSPAGVELLVK            |
|     |              |                                                                                  |      |      | 1771.82 | 3541.62 | 3538.84 | 66.53  | 0.00011  | VHEAELLSPGSTLVSFIYPAQNP  |
| 123 | gi 45387763  | hypothetical protein LOC402975 [Danio rerio]                                     | 59.5 | 284  | 623.52  | 1245.02 | 1242.65 | 66.73  | 0.00025  | IQLVEEELDR               |
|     |              |                                                                                  |      |      | 770.15  | 2307.42 | 2307.18 | 51.55  | 0.0055   | SVAKLEKTIDDLEDELYAQK     |
| 124 | gi 189528827 | PREDICTED: similar to LOC567732 protein [Danio rerio]                            | 41.1 | 1368 | 1212.43 | 2422.84 | 2422.19 | 114.22 | 2.80E-09 | GQNHLEEVELAFPQNVIEGSGR   |
| 125 | gi 41055614  | hypothetical protein LOC393478 [Danio rerio]                                     | 22.1 | 86   | 733.58  | 1465.15 | 1464.65 | 91.10  | 7.40E-07 | WDSQIEDGSFPGK            |
| 126 | gi 41055387  | hypothetical protein LOC393586 [Danio rerio]                                     | 49.3 | 647  | 830.76  | 1659.50 | 1658.89 | 82.21  | 5.90E-06 | IINEPTAAAIAYGLDK         |
|     |              |                                                                                  |      |      | 847.03  | 1692.05 | 1690.72 | 44.48  | 0.035    | STAGDTHLGGEDFDNR         |
| 127 | gi 70778808  | vesicle amine transport protein 1 [Danio rerio]                                  | 38   | 484  | 904.66  | 1807.30 | 1806.90 | 75.89  | 2.40E-05 | HEVISQGGVTHPIDYR         |
| 128 | gi 189529657 | PREDICTED: similar to nonmuscle myosin heavy chain IIA [Danio rerio]             | 37.3 | 1962 | 613.09  | 1224.17 | 1222.63 | 64.72  | 0.00033  | AGVLAHLEER               |
|     |              |                                                                                  |      |      | 864.56  | 1727.10 | 1725.94 | 69.31  | 0.00011  | QLLQANPILEAFGNAK         |
| 129 | gi 47086479  | solute carrier family 25 (mitochondrial carrier, Aralar), member 1 [Danio rerio] | 39.1 | 682  | 1325.55 | 1324.54 | 1324.74 | 84.55  | 3.40E-06 | TVHLLAGVADTTK            |
|     |              |                                                                                  |      |      | 677.29  | 1352.56 | 1352.69 | 36.67  | 0.2      | SSGISTHPETPK             |
|     |              |                                                                                  |      |      | 979.83  | 1957.64 | 1956.00 | 38.79  | 0.12     | IAPLEEGSLPYNVAEAQR       |
| 130 | gi 56118753  | troponin C, slow [Danio rerio]                                                   | 46.6 | 161  | 602.27  | 1202.52 | 1202.58 | 52.94  | 0.0057   | AAAEQLTDEQK              |
|     |              |                                                                                  |      |      | 602.42  | 1202.83 | 1202.58 | 56.98  | 0.0022   | AAAEQLTDEQK              |
|     |              |                                                                                  |      |      | 684.15  | 1366.28 | 1364.65 | 68.52  | 0.00013  | NADGYIDLDELK             |
|     |              |                                                                                  |      |      | 726.33  | 1450.65 | 1448.65 | 60.34  | 0.0009   | IDYDEFLEFMK              |
| 131 | gi 41386743  | eukaryotic translation elongation factor 2, like [Danio rerio]                   | 56.1 | 858  | 703.70  | 1405.38 | 1404.80 | 59.08  | 0.0013   | TFAQLILDPIFK             |
|     |              |                                                                                  |      |      | 1073.30 | 2144.58 | 2144.05 | 65.62  | 0.00023  | ARPPDGLAEDIDKGDVSSR      |

|     |              |                                                                 |      |      |         |         |         |        |          |                         |
|-----|--------------|-----------------------------------------------------------------|------|------|---------|---------|---------|--------|----------|-------------------------|
| 132 | gi 148922875 | hypothetical protein LOC567716 [Danio rerio]                    | 26.3 | 331  | 969.85  | 1937.69 | 1936.93 | 109.86 | 9.00E-09 | HLTTLVDDIWYYAGDR        |
| 133 | gi 49274617  | tropomyosin 1 alpha [Danio rerio]                               | 21.5 | 284  | 537.56  | 1073.11 | 1072.55 | 55.86  | 0.0032   | LDKENALDR               |
|     |              |                                                                 |      |      | 623.52  | 1245.02 | 1242.65 | 66.73  | 0.00025  | IQLVEEELDR              |
| 134 | gi 55925387  | carnitine palmitoyltransferase II [Danio rerio]                 | 46.1 | 668  | 816.40  | 1630.78 | 1631.90 | 43.55  | 0.045    | DGNLIKPAEVQAHLK         |
|     |              |                                                                 |      |      | 1128.50 | 2254.98 | 2252.11 | 37.68  | 0.14     | YLAAQRPLLNDEQYSNTEK     |
|     |              |                                                                 |      |      | 1194.52 | 2387.02 | 2384.18 | 59.47  | 0.00084  | DTTEKPLVGPSPASVDSSSA    |
| 135 | gi 30410758  | keratin 18 [Danio rerio]                                        | 41.5 | 431  | 843.64  | 1685.27 | 1683.84 | 107.62 | 1.70E-08 | NQISQSGVQVDVDPK         |
| 136 | gi 41152346  | hypothetical protein LOC393668 [Danio rerio]                    | 57.3 | 433  | 573.42  | 1144.82 | 1142.61 | 42.17  | 0.07     | IGAEVYHNLK              |
|     |              |                                                                 |      |      | 1008.42 | 3022.23 | 3020.58 | 72.22  | 3.60E-05 | HIADLAGNPEVILPVPFNVINGC |
| 137 | gi 165972393 | hypothetical protein LOC560210 [Danio rerio]                    | 57.4 | 643  | 830.76  | 1659.50 | 1658.89 | 82.21  | 5.90E-06 | IINEPTAAAIAYGLDK        |
| 139 | gi 47085775  | heat shock 70kDa protein 5 [Danio rerio]                        | 45.2 | 650  | 830.76  | 1659.50 | 1658.89 | 82.21  | 5.90E-06 |                         |
| 140 | gi 189517055 | PREDICTED: similar to heat shock protein 8 [Danio rerio]        | 51.3 | 698  | 830.76  | 1659.50 | 1658.89 | 82.21  | 5.90E-06 |                         |
| 141 | gi 41053611  | hypothetical protein LOC393828 [Danio rerio]                    | 42.7 | 213  | 1602.92 | 3203.82 | 3202.41 | 103.90 | 2.40E-08 | YTFESIQNEANALFNNENQANAI |
| 142 | gi 47086533  | 2-peptidylprolyl isomerase A [Danio rerio]                      | 63.4 | 164  | 820.21  | 1638.40 | 1637.91 | 103.88 | 3.90E-08 | HVVFQGVVEGLDVIK         |
| 143 | gi 160420306 | hypothetical protein LOC678536 [Danio rerio]                    | 58.9 | 1358 | 481.12  | 960.22  | 959.47  | 36.63  | 0.28     | LEVEWER                 |
|     |              |                                                                 |      |      | 587.65  | 1173.29 | 1172.62 | 56.41  | 0.0027   | LEFEVQVGPR              |
|     |              |                                                                 |      |      | 590.06  | 1178.11 | 1176.64 | 48.71  | 0.015    | QTLAFVEIEK              |
|     |              |                                                                 |      |      | 692.52  | 1383.03 | 1381.78 | 54.77  | 0.0034   | ISDAPAQIVEVLK           |
| 144 | gi 189533701 | PREDICTED: calpastatin [Danio rerio]                            | 64.8 | 824  | 1343.80 | 1342.79 | 1342.74 | 71.34  | 7.60E-05 | HGAGVPAGVPEKPK          |
|     |              |                                                                 |      |      | 735.92  | 1469.83 | 1470.83 | 57.29  | 0.0018   | KHGAGVPAGVPEKPK         |
| 145 | gi 48762665  | ubiquinol-cytochrome c reductase core protein II [Danio rerio]  | 39.9 | 454  | 1245.76 | 1244.75 | 1244.68 | 78.80  | 1.50E-05 | KVDFAAAGEPLK            |
|     |              |                                                                 |      |      | 693.59  | 1385.16 | 1385.75 | 63.33  | 0.00049  | INAVSSADVNVAK           |
| 146 | gi 52219050  | hypothetical protein LOC447859 [Danio rerio]                    | 66.6 | 617  | 701.31  | 1400.60 | 1400.70 | 64.79  | 0.00033  | HSGSDYAQLKPAK           |
|     |              |                                                                 |      |      | 928.87  | 2783.58 | 2782.39 | 77.52  | 1.20E-05 | ITDENLQSQTGLYIPEYEEALKI |
| 147 | gi 70778734  | ATPase, Na+/K+ transporting, alpha 3b polypeptide [Danio rerio] | 52   | 1023 | 906.81  | 1811.60 | 1810.94 | 74.81  | 3.00E-05 | QGAIVAVTGDGVNDSPALK     |
|     |              |                                                                 |      |      | 924.65  | 1847.29 | 1846.81 | 64.13  | 0.00035  | YQLSIHETEDNNDNR         |
| 148 | gi 148224245 | hypothetical protein LOC793834 [Danio rerio]                    | 59   | 763  | 653.21  | 1304.41 | 1303.71 | 61.87  | 0.00069  | MQLLEIITTDK             |
|     |              |                                                                 |      |      | 752.68  | 1503.34 | 1503.72 | 64.87  | 0.00033  | TAEVVTGLSQEGQR          |
| 149 | gi 47174755  | myosin light chain alkali, smooth-muscle isoform [Danio rerio]  | 74.2 | 151  | 757.12  | 1512.23 | 1511.69 | 84.28  | 3.60E-06 | DQGTFFDFVEGLR           |
| 150 | gi 189519111 | PREDICTED: similar to ATPase, Ca++ transporting, fast           | 48.2 | 1005 | 1072.60 | 1071.59 | 1071.56 | 41.86  | 0.08     | NAENAIEALK              |
|     |              |                                                                 |      |      | 788.74  | 1575.47 | 1573.86 | 86.36  | 2.40E-06 | VDQSILTGESVSVIK         |
| 151 | gi 113678245 | hypothetical protein LOC558738 [Danio rerio]                    | 74.8 | 111  | 845.40  | 1688.79 | 1689.84 | 97.41  | 1.80E-07 | IEFSPLDAWNSGVQK         |
| 152 | gi 150378483 | heat shock protein, alpha-crystallin-related, b11 [Danio rerio] | 28.8 | 205  | 1113.54 | 2225.06 | 2223.99 | 95.53  | 2.30E-07 | NPALQNSEPENQAVEAEEAEN   |
| 153 | gi 41393141  | tropomyosin 3 [Danio rerio]                                     | 36.3 | 248  | 623.52  | 1245.02 | 1242.65 | 66.73  | 0.00025  | IQLVEEELDR              |
| 154 | gi 41055939  | sorting and assembly machinery component 50 homolog             | 54.2 | 469  | 665.69  | 1994.04 | 1992.02 | 64.06  | 0.00033  | TKEDILTYEIAVDFHAK       |
| 155 | gi 47085999  | hypothetical protein LOC406484 [Danio rerio]                    | 34.6 | 361  | 850.81  | 1699.60 | 1700.90 | 94.54  | 3.30E-07 | EKGQAFLDDLILDPK         |
| 156 | gi 55741944  | wu:cegs655 [Danio rerio]                                        | 37.7 | 994  | 788.74  | 1575.47 | 1573.86 | 86.36  | 2.40E-06 | VDQSILTGESVSVIK         |
| 157 | gi 117606266 | ATPase, Ca++ transporting, cardiac muscle, fast twitch 1        | 46.7 | 991  | 788.74  | 1575.47 | 1573.86 | 86.36  | 2.40E-06 |                         |
| 158 | gi 189517144 | PREDICTED: similar to adaptor-related protein complex 2         | 50.8 | 930  | 835.88  | 1669.75 | 1668.88 | 78.67  | 1.30E-05 | KGPGAVSVNELEEGKR        |
| 159 | gi 27545251  | solute carrier family 25 alpha, member 5 [Danio rerio]          | 66.4 | 298  | 525.02  | 1048.03 | 1047.57 | 38.02  | 0.18     | VFLDGVDKR               |
|     |              |                                                                 |      |      | 589.21  | 1176.41 | 1175.67 | 69.50  | 0.00013  | KVFLDGVDKR              |
|     |              |                                                                 |      |      | 618.00  | 1233.99 | 1232.68 | 66.02  | 0.00027  | DFLAGGIAAAISK           |
| 160 | gi 24119234  | triosephosphate isomerase 1a [Danio rerio]                      | 46.8 | 248  | 1458.82 | 1457.81 | 1457.72 | 75.26  | 3.00E-05 | HVFGESDELIGQK           |
|     |              |                                                                 |      |      | 808.43  | 1614.84 | 1613.82 | 57.16  | 0.0019   | RHVFGESDELIGQK          |
| 161 | gi 154707842 | methylmalonyl Coenzyme A mutase [Danio rerio]                   | 37.3 | 757  | 595.61  | 1189.21 | 1188.61 | 47.59  | 0.02     | AGLTIDEFAPR             |
|     |              |                                                                 |      |      | 870.13  | 1738.25 | 1737.81 | 79.76  | 1.00E-05 | SEFGEHEEIALAHR          |
| 162 | gi 47777306  | Voltage-dependent anion channel 1 [Danio rerio]                 | 57.6 | 283  | 660.08  | 1318.14 | 1317.64 | 60.19  | 0.001    | WAEHGLTFTEK             |
|     |              |                                                                 |      |      | 1045.44 | 2088.86 | 2088.16 | 70.82  | 6.90E-05 | VNSSLVGLGYTQTLKPGIK     |
| 163 | gi 68379126  | PREDICTED: hypothetical protein LOC767664 [Danio rerio]         | 65.4 | 81   | 1494.75 | 1493.74 | 1493.82 | 56.01  | 0.0024   | IFLEDNGLPVHIK           |
|     |              |                                                                 |      |      | 748.64  | 1495.27 | 1493.82 | 76.25  | 2.20E-05 |                         |
| 164 | gi 68448530  | vitellogenin 5 [Danio rerio]                                    | 51.2 | 1360 | 481.12  | 960.22  | 959.47  | 36.63  | 0.28     | LEVEWER                 |
|     |              |                                                                 |      |      | 587.65  | 1173.29 | 1172.62 | 56.41  | 0.0027   | LEFEVQVGPR              |

|     |              |                                                                                  |      |      |         |         |         |       |          |                         |
|-----|--------------|----------------------------------------------------------------------------------|------|------|---------|---------|---------|-------|----------|-------------------------|
| 165 | gi 46559752  | ATPase, Na+/K+ transporting, beta 1a polypeptide [Danio rerio]                   | 40.8 | 306  | 590.06  | 1178.11 | 1176.64 | 48.71 | 0.015    | QTLAFVEIEK              |
|     |              |                                                                                  |      |      | 659.22  | 1316.43 | 1315.59 | 65.54 | 0.0003   | VYGENIDYSEK             |
|     |              |                                                                                  |      |      | 701.50  | 1400.99 | 1398.75 | 66.80 | 0.00022  | REEEANLLGQIK            |
| 166 | gi 50344731  | fibrinogen alpha chain [Danio rerio]                                             | 57   | 684  | 676.59  | 1351.17 | 1350.70 | 72.52 | 5.30E-05 | LGISDSEFLTAAK           |
|     |              |                                                                                  |      |      | 750.64  | 1499.26 | 1498.69 | 57.20 | 0.0018   | FPTSGTGSTSQTSNK         |
| 167 | gi 54262125  | heat shock protein 9 [Danio rerio]                                               | 56.9 | 682  | 823.69  | 1645.37 | 1644.87 | 88.91 | 1.30E-06 | VINEPTAAALAYGLDK        |
| 168 | gi 189533438 | PREDICTED: novel protein similar to vertebrate apolipoprotein A-II [Danio rerio] | 37.7 | 2633 | 1037.68 | 2073.35 | 2075.28 | 38.73 | 0.12     | LRLLLFFSLIILSICRR       |
|     |              |                                                                                  |      |      | 1230.28 | 2458.55 | 2458.19 | 81.11 | 5.50E-06 | HAINQEINAYNTPAQFGLEGSGI |
| 169 | gi 41056123  | phosphoglycerate mutase 2 (muscle) [Danio rerio]                                 | 72.5 | 255  | 530.30  | 1058.58 | 1058.55 | 50.79 | 0.011    | HYGGLTGLNK              |
|     |              |                                                                                  |      |      | 633.57  | 1265.13 | 1263.70 | 50.58 | 0.0088   | NVIAAHGNSLR             |
|     |              |                                                                                  |      |      | 672.48  | 1342.95 | 1342.57 | 41.92 | 0.067    | HGESSWNQENR             |
|     |              |                                                                                  |      |      | 828.27  | 1654.52 | 1653.91 | 60.12 | 0.00091  | ALPFWNEVIVPEIK          |
|     |              |                                                                                  |      |      | 1058.87 | 2115.72 | 2115.10 | 36.73 | 0.18     | DLKPIKPMQFLGDEETVR      |
| 170 | gi 54400698  | hydroxysteroid (17-beta) dehydrogenase 10 [Danio rerio]                          | 63.8 | 260  | 852.76  | 1703.51 | 1702.86 | 86.75 | 2.00E-06 | HGASAVILDLPSSDGHK       |
| 171 | gi 120952565 | reticulon 4a isoform 4-I [Danio rerio]                                           | 31.1 | 322  | 843.32  | 1684.62 | 1684.83 | 86.64 | 2.10E-06 | HQAQIDHYYGLVNK          |
| 172 | gi 40254661  | annexin A5 [Danio rerio]                                                         | 42.3 | 317  | 530.21  | 1058.40 | 1058.56 | 40.72 | 0.1      | SEVDLLDIR               |
|     |              |                                                                                  |      |      | 1144.59 | 2287.17 | 2284.98 | 86.60 | 1.80E-06 | EHDKDLEEDVTGDTGGHFER    |
| 173 | gi 41387146  | peroxiredoxin 6 [Danio rerio]                                                    | 45.5 | 222  | 1052.48 | 2102.95 | 2103.09 | 75.38 | 2.50E-05 | PGILLGDVFPNFADTTIGK     |
| 174 | gi 157426949 | hydroxyacyl-Coenzyme A dehydrogenase/3-ketoacyl-CoA synthetase [Danio rerio]     | 60.8 | 761  | 653.21  | 1304.41 | 1303.71 | 61.87 | 0.00069  | MQLLEIITTDK             |
|     |              |                                                                                  |      |      | 697.27  | 1392.52 | 1392.67 | 46.97 | 0.021    | LSGQLDYHGFEK            |
|     |              |                                                                                  |      |      | 882.60  | 1763.19 | 1760.86 | 42.36 | 0.057    | LTAPPAVSSDEDIQYR        |
| 175 | gi 62955301  | hypothetical protein LOC550355 [Danio rerio]                                     | 50.6 | 255  | 925.29  | 1848.57 | 1848.92 | 77.21 | 1.70E-05 | VLPGVDTVVGHEEEQGGK      |
| 176 | gi 47085765  | hypothetical protein LOC406325 [Danio rerio]                                     | 59.7 | 397  | 1188.77 | 1187.76 | 1187.68 | 48.56 | 0.017    | ITAHLVHELK              |
|     |              |                                                                                  |      |      | 932.43  | 1862.85 | 1861.98 | 75.84 | 2.40E-05 | TNVNGGAIAGHPLGASGTR     |
| 177 | gi 189519965 | PREDICTED: similar to nonmuscle myosin heavy chain IIA [Danio rerio]             | 40.3 | 1857 | 1093.83 | 2185.64 | 2184.99 | 76.48 | 1.90E-05 | HAEQERDELADEISNSASGK    |
| 178 | gi 189519969 | PREDICTED: myosin, heavy polypeptide 10, non-muscle isoform 1 [Danio rerio]      | 37.5 | 1973 | 1093.83 | 2185.64 | 2184.99 | 76.48 | 1.90E-05 |                         |
| 179 | gi 54400460  | fibulin 5 [Danio rerio]                                                          | 56   | 477  | 1111.23 | 2220.45 | 2220.00 | 85.10 | 2.50E-06 | NSPLPYPEASYPEEPYPR      |
| 180 | gi 57526509  | propionyl-Coenzyme A carboxylase, alpha polypeptide [Danio rerio]                | 55.6 | 709  | 1164.68 | 1163.67 | 1164.65 | 55.10 | 0.0032   | HIEIQVLADK              |
|     |              |                                                                                  |      |      | 827.11  | 1652.21 | 1649.84 | 62.11 | 0.00057  | TVAVHSDVDSSAVHVK        |
| 181 | gi 68389723  | PREDICTED: catechol-O-methyltransferase domain containing protein [Danio rerio]  | 61.8 | 238  | 1029.00 | 2055.99 | 2055.00 | 84.28 | 3.10E-06 | SHEGDDPLLQYVVNNSLR      |
| 182 | gi 41055748  | integrin linked kinase [Danio rerio]                                             | 20.4 | 452  | 792.72  | 1583.43 | 1582.76 | 83.90 | 4.00E-06 | GDDTPLHLAASHGHR         |
| 183 | gi 113678344 | BCL2-like 13 (apoptosis facilitator) [Danio rerio]                               | 32.4 | 485  | 1030.15 | 3087.41 | 3085.41 | 61.28 | 0.00044  | SLDSAEGVALAEEQSENNSSNS  |
| 184 | gi 61806484  | hypothetical protein LOC541328 [Danio rerio]                                     | 58.6 | 116  | 1121.07 | 2240.13 | 2240.16 | 83.69 | 3.50E-06 | INAGQIEEVIAQAEELSLSR    |
| 185 | gi 189521338 | PREDICTED: hypothetical protein [Danio rerio]                                    | 56.2 | 523  | 790.68  | 1579.35 | 1577.76 | 83.48 | 4.30E-06 | YDVQVQIENVEDK           |
|     |              |                                                                                  |      |      | 945.67  | 1889.33 | 1888.04 | 37.61 | 0.15     | ASVNIQIVDVPQPPQNLK      |
| 186 | gi 189520787 | PREDICTED: tyrosine 3-monooxygenase/tryptophan 5-monooxygenase [Danio rerio]     | 46.7 | 244  | 903.52  | 902.51  | 902.51  | 42.18 | 0.083    | VISSIEQK                |
|     |              |                                                                                  |      |      | 1155.50 | 1154.49 | 1154.55 | 60.78 | 0.00087  | YLSEVASGDSK             |
|     |              |                                                                                  |      |      | 587.18  | 1172.34 | 1170.56 | 41.88 | 0.075    | AYQDAFEISK              |
|     |              |                                                                                  |      |      | 745.40  | 1488.78 | 1488.71 | 51.91 | 0.0066   | AVTEGGVELSNEER          |
| 187 | gi 67514531  | ubiquitin specific protease 5 [Danio rerio]                                      | 33.7 | 834  | 602.99  | 1805.95 | 1804.92 | 67.29 | 0.00017  | RREEAESSGAPPPVAPR       |
| 188 | gi 47085905  | tyrosine 3-monooxygenase/tryptophan 5-monooxygenase [Danio rerio]                | 40.1 | 242  | 903.52  | 902.51  | 902.51  | 42.18 | 0.083    | VISSIEQK                |
|     |              |                                                                                  |      |      | 1155.50 | 1154.49 | 1154.55 | 60.78 | 0.00087  | YLSEVASGDSK             |
|     |              |                                                                                  |      |      | 745.40  | 1488.78 | 1488.71 | 51.91 | 0.0066   | AVTEGGVELSNEER          |
| 189 | gi 58801526  | SET translocation (myeloid leukemia-associated) B [Danio rerio]                  | 24.7 | 275  | 1098.47 | 2194.92 | 2194.01 | 81.47 | 5.80E-06 | EQQEAIEHIDEVQNEIDR      |
| 190 | gi 58801528  | SET translocation (myeloid leukemia-associated) A [Danio rerio]                  | 17.5 | 269  | 1098.47 | 2194.92 | 2194.01 | 81.47 | 5.80E-06 |                         |
| 191 | gi 47086189  | propionyl Coenzyme A carboxylase, beta polypeptide [Danio rerio]                 | 70.4 | 557  | 838.80  | 1675.58 | 1675.79 | 55.44 | 0.0028   | SVTNEDVTQEELGGAK        |
|     |              |                                                                                  |      |      | 872.59  | 1743.16 | 1744.85 | 63.94 | 0.00038  | AYDMLDIVHGIVDER         |
| 192 | gi 47085923  | pyruvate dehydrogenase (lipoamide) beta [Danio rerio]                            | 38.4 | 359  | 879.64  | 1757.27 | 1758.94 | 53.19 | 0.0045   | SIRPLDADTIETSITK        |
|     |              |                                                                                  |      |      | 901.77  | 1801.52 | 1800.89 | 51.77 | 0.0062   | VFLLGEEVAQYDGAYK        |
|     |              |                                                                                  |      |      | 967.33  | 1932.65 | 1932.85 | 44.87 | 0.028    | DALNQAMDEELERDER        |
| 193 | gi 50540382  | hypothetical protein LOC436930 [Danio rerio]                                     | 47.4 | 460  | 735.25  | 1468.49 | 1467.79 | 63.52 | 0.00043  | ALADQSPQIGVLEK          |
|     |              |                                                                                  |      |      | 832.57  | 1663.12 | 1662.89 | 52.80 | 0.0051   | SAAPPVLQPQDVQVSK        |



|     |              |                                                           |      |      |         |         |         |       |          |                        |
|-----|--------------|-----------------------------------------------------------|------|------|---------|---------|---------|-------|----------|------------------------|
| 194 | gi 54606886  | hexokinase 1 [Danio rerio]                                | 48.1 | 918  | 864.33  | 1726.64 | 1723.83 | 79.77 | 9.90E-06 | TKYDDAVDDLSTLNAGK      |
| 195 | gi 51010975  | hypothetical protein LOC445053 [Danio rerio]              | 36.8 | 204  | 853.63  | 1705.25 | 1704.91 | 79.51 | 1.10E-05 | GATYGKPVHHGVNQIK       |
| 196 | gi 189518076 | PREDICTED: filamin C, gamma b (actin binding protein 2    | 46.8 | 2732 | 805.13  | 1608.25 | 1607.78 | 36.13 | 0.23     | VDVGKDEEFTVNTR         |
|     |              |                                                           |      |      | 1115.87 | 2229.73 | 2228.03 | 42.68 | 0.044    | DGSCGVAYIVQEPGDYEVSIGK |
|     |              |                                                           |      |      | 1152.87 | 2303.73 | 2303.14 | 72.02 | 4.80E-05 | GQHVPGPSFQFTVGPLGEGGA  |
| 197 | gi 45356143  | tumor protein D52-like 2 isoform 1 [Danio rerio]          | 55.7 | 201  | 737.80  | 1473.58 | 1473.69 | 79.41 | 1.20E-05 | GLGSDSISDLPEER         |
| 198 | gi 62955689  | hypothetical protein LOC550556 [Danio rerio]              | 41.9 | 270  | 843.24  | 1684.46 | 1682.84 | 80.84 | 7.80E-06 | AFAEFLTEEIKKEEK        |
| 199 | gi 51467909  | ATP synthase, H+ transporting, mitochondrial F1 comple:   | 80.4 | 209  | 637.34  | 1272.66 | 1272.67 | 64.58 | 0.00038  | SLDKVEQELGR            |
|     |              |                                                           |      |      | 782.72  | 1563.43 | 1561.80 | 42.52 | 0.055    | SDASILGGMIVSIGDK       |
| 200 | gi 113678458 | vitellogenin 2 isoform 1 [Danio rerio]                    | 50.9 | 1631 | 587.65  | 1173.29 | 1172.62 | 56.41 | 0.0027   | LEFEVQVGPR             |
| 201 | gi 45387723  | hypothetical protein LOC402952 [Danio rerio]              | 28.7 | 331  | 1181.36 | 3541.04 | 3539.71 | 57.14 | 0.00093  | GEDYYPPIPPHYPPHPHDHPHI |
| 202 | gi 27545305  | laminin, gamma 1 [Danio rerio]                            | 58.2 | 1593 | 559.44  | 1116.86 | 1115.56 | 37.28 | 0.22     | DAENLINTAR             |
|     |              |                                                           |      |      | 665.17  | 1328.32 | 1327.68 | 63.97 | 0.00042  | RAEALGNAAADAK          |
|     |              |                                                           |      |      | 963.13  | 1924.24 | 1924.06 | 50.87 | 0.007    | EVLNTINALLGQLGNIDK     |
| 203 | gi 47085823  | acyl-Coenzyme A dehydrogenase, C-4 to C-12 straight cl    | 56.6 | 424  | 924.30  | 1846.58 | 1846.92 | 75.34 | 2.70E-05 | AFTGFIVDADTPGVQPGR     |
| 204 | gi 30017425  | ATPase, Na+/K+ transporting, alpha 1a.5 polypeptide [D    | 37.7 | 1023 | 906.81  | 1811.60 | 1810.94 | 74.81 | 3.00E-05 | QGAIVAVTGDGVNDSPALK    |
| 205 | gi 18858297  | ATPase, Na+/K+ transporting, alpha 1a.2 polypeptide [D    | 40.7 | 1023 | 906.81  | 1811.60 | 1810.94 | 74.81 | 3.00E-05 |                        |
| 206 | gi 18858303  | ATPase, Na+/K+ transporting, alpha 1b polypeptide [Dan    | 41.5 | 1025 | 906.81  | 1811.60 | 1810.94 | 74.81 | 3.00E-05 |                        |
| 208 | gi 18858305  | ATPase, Na+/K+ transporting, alpha 2a polypeptide [Dan    | 24.7 | 1017 | 906.81  | 1811.60 | 1810.94 | 74.81 | 3.00E-05 |                        |
| 209 | gi 66472494  | phosphorylase, glycogen (muscle) A [Danio rerio]          | 40.6 | 842  | 594.42  | 1186.83 | 1184.64 | 74.74 | 4.00E-05 | GLAGVENVADLK           |
| 210 | gi 41054784  | phosphorylase, glycogen (muscle) b [Danio rerio]          | 44.4 | 315  | 594.42  | 1186.83 | 1184.64 | 74.74 | 4.00E-05 |                        |
| 211 | gi 41387136  | hypothetical protein LOC393781 [Danio rerio]              | 45.3 | 128  | 902.80  | 1803.58 | 1801.94 | 74.18 | 3.60E-05 | YHVSETPFAISAQKPK       |
| 212 | gi 53933242  | cytochrome c oxidase subunit VIa polypeptide 1 [Danio r   | 62   | 108  | 781.74  | 2342.19 | 2341.05 | 50.66 | 0.0068   | TLFHNPHVNALPDGYEHHDE   |
| 213 | gi 41282137  | ATPase, Na+/K+ transporting, alpha 3a polypeptide [Dan    | 43.8 | 1023 | 906.81  | 1811.60 | 1810.94 | 74.81 | 3.00E-05 | QGAIVAVTGDGVNDSPALK    |
| 214 | gi 47085679  | electron-transfer-flavoprotein, beta polypeptide [Danio r | 61.4 | 254  | 924.89  | 923.88  | 924.50  | 63.43 | 0.00041  | GIHVEVSGK              |
| 215 | gi 61806580  | hypothetical protein LOC541378 [Danio rerio]              | 49.6 | 448  | 919.52  | 1837.03 | 1836.96 | 73.38 | 4.20E-05 | DKPHLNIGTIGHVDHGK      |
| 216 | gi 35902900  | aldolase c, fructose-bisphosphate [Danio rerio]           | 34.2 | 363  | 1136.95 | 2271.88 | 2271.13 | 72.97 | 4.10E-05 | GVVPLAGTNGETTTQGLDGLSE |
| 217 | gi 57525836  | hypothetical protein LOC445175 [Danio rerio]              | 37.9 | 697  | 652.16  | 1302.30 | 1301.66 | 63.04 | 0.00053  | SHIDELYANIK            |
| 218 | gi 66472480  | NADH dehydrogenase (ubiquinone) Fe-S protein 5 [Danio     | 53.8 | 106  | 643.28  | 1284.55 | 1283.66 | 72.00 | 6.40E-05 | WLLAQSGEQPR            |
| 219 | gi 189536521 | PREDICTED: similar to phosphofructokinase, platelet [D    | 60.5 | 789  | 699.53  | 1397.05 | 1395.70 | 71.84 | 6.30E-05 | DLQANVEHLTEK           |
| 220 | gi 189514551 | PREDICTED: sorbin and SH3 domain containing 2a [Dan       | 38.7 | 2115 | 643.71  | 1285.40 | 1284.76 | 57.60 | 0.0018   | KSPTPVPLPPPR           |
| 221 | gi 41152365  | ATP synthase, H+ transporting, mitochondrial F1 comple:   | 68.6 | 159  | 732.54  | 1463.06 | 1462.69 | 70.61 | 8.60E-05 | AQSELVSASDEATR         |
|     |              |                                                           |      |      | 800.48  | 1598.94 | 1597.89 | 39.05 | 0.12     | AEVLISIEANEIVK         |
| 222 | gi 51010955  | hypothetical protein LOC445042 [Danio rerio]              | 40.4 | 104  | 609.53  | 1217.04 | 1215.65 | 71.12 | 8.90E-05 | ALTAGSEASGKPK          |
| 223 | gi 38488700  | phosphoglycerate mutase 1 [Danio rerio]                   | 57.5 | 254  | 530.30  | 1058.58 | 1058.55 | 50.79 | 0.011    | HYGGLTGLNK             |
|     |              |                                                           |      |      | 835.57  | 1669.12 | 1668.89 | 60.67 | 0.0008   | ALPFWNDEIVPQIK         |
| 224 | gi 41053309  | hydroxyacylglutathione hydrolase [Danio rerio]            | 40   | 260  | 970.67  | 1939.33 | 1938.91 | 70.11 | 8.40E-05 | TVLTTTHHWDHAGGNEK      |
| 225 | gi 47086009  | ribosomal protein L19 [Danio rerio]                       | 43.9 | 196  | 972.51  | 1943.00 | 1941.92 | 70.00 | 8.40E-05 | VWLDPNETNEIANANSR      |
| 226 | gi 18858873  | heat shock protein 90-alpha 1 [Danio rerio]               | 33.7 | 726  | 868.56  | 1735.10 | 1734.74 | 69.58 | 0.00011  | IEDLGADEDEDSKDGK       |
| 227 | gi 189517212 | PREDICTED: similar to myosin, heavy polypeptide 11, sr    | 35.1 | 1994 | 864.56  | 1727.10 | 1725.94 | 69.31 | 0.00011  | QLLQANPILEAFGNAK       |
| 228 | gi 116235424 | hypothetical protein LOC572011 [Danio rerio]              | 35.1 | 823  | 715.67  | 1429.33 | 1429.70 | 69.18 | 0.00012  | ELQEAQELANTGK          |
| 229 | gi 189537447 | PREDICTED: similar to Ndufa9 protein [Danio rerio]        | 39.5 | 380  | 690.97  | 1379.93 | 1379.71 | 69.07 | 0.00012  | FFEAAVGEAKPSK          |
| 230 | gi 47550733  | SERPINE1 mRNA binding protein 1 [Danio rerio]             | 60.9 | 391  | 1118.80 | 2235.59 | 2235.08 | 68.31 | 0.00012  | RFDKPADEKPAEGGEFSVEK   |
| 231 | gi 189523865 | PREDICTED: myosin 1b-like 2 [Danio rerio]                 | 40.4 | 1078 | 752.67  | 2254.98 | 2255.13 | 50.39 | 0.0075   | SLRHQDKDQCILITGESGAGK  |
| 232 | gi 189527793 | PREDICTED: wu:fb05a01 [Danio rerio]                       | 47.6 | 6009 | 578.82  | 1155.63 | 1155.65 | 55.90 | 0.0028   | LKGDVDVSVPK            |
|     |              |                                                           |      |      | 651.29  | 1300.57 | 1299.69 | 36.73 | 0.22     | LMGSNVDLNLPK           |
| 233 | gi 70887615  | hypothetical protein LOC558711 [Danio rerio]              | 59.9 | 367  | 656.84  | 1311.67 | 1311.74 | 67.35 | 0.00018  | VKVESQVAVPEK           |
| 234 | gi 51467931  | enolase 2 [Danio rerio]                                   | 45.2 | 434  | 1008.42 | 3022.23 | 3024.58 | 66.73 | 0.00013  | HIADLAGNTELVLPVPAFNVI  |
| 235 | gi 82658182  | cytochrome c-1 [Danio rerio]                              | 36.2 | 307  | 715.11  | 1428.21 | 1425.71 | 66.24 | 0.00024  | NLVGVSHTEDEVK          |
| 236 | gi 125832496 | PREDICTED: similar to mCG2694 [Danio rerio]               | 54.5 | 308  | 550.57  | 1099.13 | 1098.61 | 50.09 | 0.011    | QLADALKANR             |
| 237 | gi 41054573  | hydroxysteroid dehydrogenase like 2 [Danio rerio]         | 55.2 | 415  | 1588.03 | 3174.05 | 3171.54 | 58.77 | 0.00079  | DFDVYAVEPGHPLLPDFFLDGQ |
| 238 | gi 189532432 | PREDICTED: novel protein similar to vertebrate AT rich ii | 29   | 2113 | 651.79  | 1301.56 | 1299.71 | 37.15 | 0.2      | EIGGLTQVNKNK           |

|     |              |                                                                                        |      |        |         |         |         |       |                                 |
|-----|--------------|----------------------------------------------------------------------------------------|------|--------|---------|---------|---------|-------|---------------------------------|
|     |              |                                                                                        |      | 653.21 | 1304.41 | 1303.77 | 60.26   | 0.001 | RCLIEIFGILK                     |
| 239 | gi 189532434 | PREDICTED: im:7160733 [Danio rerio]                                                    | 30.8 | 1248   | 653.21  | 1304.41 | 1303.77 | 60.26 | 0.001 RCLIEIFGILK               |
| 240 | gi 41056085  | keratin 8 [Danio rerio]                                                                | 42.7 | 520    | 1308.67 | 1307.66 | 1307.65 | 40.71 | 0.085 NKYEDEINKR                |
|     |              |                                                                                        |      |        | 744.60  | 1487.19 | 1485.71 | 65.58 | 0.00028 ANLENQIAEAEER           |
| 241 | gi 38707985  | electron-transfer-flavoprotein, alpha polypeptide [Danio rerio]                        | 43.8 | 333    | 713.78  | 1425.54 | 1424.81 | 70.23 | 9.20E-05 LDVAPISDIIIEIK         |
| 242 | gi 113681458 | Ndr4 [Danio rerio]                                                                     | 35.5 | 352    | 939.29  | 1876.56 | 1876.00 | 63.58 | 0.00039 GNKPAILTYHDVGLNHHK      |
| 243 | gi 113674619 | hypothetical protein LOC692305 [Danio rerio]                                           | 34.9 | 352    | 939.29  | 1876.56 | 1876.00 | 63.58 | 0.00039 GNKPAILTYHDVGLNHHK      |
| 244 | gi 21426835  | glucose phosphate isomerase a [Danio rerio]                                            | 32.5 | 553    | 717.59  | 1433.16 | 1432.70 | 63.47 | 0.00045 ELQASGLSGDSLEK          |
| 245 | gi 54400554  | cysteine and glycine-rich protein 3 (cardiac LIM protein) [Danio rerio]                | 79.3 | 193    | 818.62  | 2452.82 | 2452.15 | 42.68 | 0.04 SLESTTVTDKDGELYCKVCYAK     |
|     |              |                                                                                        |      |        | 1251.74 | 2501.47 | 2503.17 | 53.78 | 0.003 KGLDSTTVAHESEIYCKTCYGR    |
| 246 | gi 41152026  | phosphoglycerate mutase 1 like b [Danio rerio]                                         | 40.2 | 254    | 530.30  | 1058.58 | 1058.55 | 50.79 | 0.011 HYGGLTGLNK                |
|     |              |                                                                                        |      |        | 1051.63 | 2101.25 | 2100.10 | 47.40 | 0.016 NLKPVKPMQFLGDEETVR        |
| 247 | gi 116235416 | hypothetical protein LOC553452 [Danio rerio]                                           | 33.2 | 316    | 1009.26 | 2016.51 | 2014.96 | 62.10 | 0.00052 HIDGAAVYNNETEVEGEGIK    |
| 248 | gi 189538466 | PREDICTED: similar to alpha 2 actin [Danio rerio]                                      | 57.6 | 132    | 1161.09 | 1160.08 | 1160.61 | 45.99 | 0.029 EITALAPSTMK               |
|     |              |                                                                                        |      |        | 1115.18 | 2228.34 | 2227.06 | 49.56 | 0.0091 DLYANNVLSGGTTMYPGIADR    |
| 249 | gi 51011113  | hydroxyacyl-Coenzyme A dehydrogenase [Danio rerio]                                     | 84.5 | 309    | 819.15  | 1636.29 | 1636.85 | 49.33 | 0.011 DPDNPLFAPSPLLNK           |
|     |              |                                                                                        |      |        | 923.59  | 2767.73 | 2767.42 | 36.64 | 0.14 NVSTSTDAASVVHGTDLVVEAIV    |
| 250 | gi 47087077  | phosphoglycerate kinase 1 [Danio rerio]                                                | 57.1 | 417    | 916.46  | 915.45  | 915.45  | 52.89 | 0.0064 FHVAEEGK                 |
|     |              |                                                                                        |      |        | 817.60  | 1633.19 | 1633.78 | 36.82 | 0.21 LGDVYVNDAFGTAHR            |
| 251 | gi 61651682  | fibronectin 1b [Danio rerio]                                                           | 41.9 | 2408   | 1070.65 | 3208.93 | 3208.44 | 59.70 | 0.00062 INTVGPTGHDSTDAHGQHVEYT  |
| 252 | gi 41055823  | hypothetical protein LOC393488 [Danio rerio]                                           | 17.2 | 186    | 968.51  | 967.50  | 966.55  | 60.55 | 0.00083 HVLATLGEK               |
| 253 | gi 32308156  | annexin A1a [Danio rerio]                                                              | 40.6 | 340    | 783.03  | 1564.04 | 1563.83 | 59.90 | 0.00099 GVDEPTIIDTLVHR          |
| 254 | gi 189536881 | PREDICTED: hypothetical protein LOC402880 [Danio rerio]                                | 26.6 | 173    | 685.99  | 1369.96 | 1367.74 | 50.88 | 0.0081 LDTPLDPVPFVR             |
| 255 | gi 40363541  | S-adenosylhomocysteine hydrolase [Danio rerio]                                         | 33.5 | 433    | 480.61  | 1438.81 | 1437.75 | 58.91 | 0.0012 KLDEEVAAHLDK             |
| 256 | gi 50344812  | ribosomal protein S13 [Danio rerio]                                                    | 43   | 151    | 848.35  | 1694.68 | 1692.91 | 58.79 | 0.0013 GLAPDLPEDLYHLIK          |
| 257 | gi 41054351  | ribosomal protein L27 [Danio rerio]                                                    | 22.8 | 136    | 752.58  | 2254.71 | 2255.09 | 58.76 | 0.0011 NIDDGTADRPYSHALVAGIDR    |
| 258 | gi 50539832  | lysyl-tRNA synthetase [Danio rerio]                                                    | 34.9 | 602    | 1124.52 | 2247.02 | 2247.14 | 58.56 | 0.0011 YNHLQPGDHLTDVVLNLSGR     |
| 259 | gi 57525624  | malic enzyme 2, NAD(+)-dependent, mitochondrial [Danio rerio]                          | 47.7 | 581    | 1093.30 | 2184.59 | 2184.23 | 58.56 | 0.0012 SFLDAVNVIKPTAIGVSGAGR    |
| 260 | gi 189518755 | PREDICTED: similar to malic enzyme 2, NAD(+)-dependent [Danio rerio]                   | 46.3 | 581    | 1093.30 | 2184.59 | 2184.23 | 58.56 | 0.0012                          |
| 261 | gi 47551341  | adenylosuccinate synthase like 1 [Danio rerio]                                         | 46.9 | 456    | 643.44  | 1284.87 | 1284.72 | 56.83 | 0.0021 LDILDVLDEIK              |
| 262 | gi 189526054 | PREDICTED: hypothetical protein LOC335621, partial [Danio rerio]                       | 52.3 | 530    | 721.66  | 1441.30 | 1439.87 | 56.81 | 0.0021 AKLAAQEVELKLK            |
| 263 | gi 113678983 | hypothetical protein LOC751707 [Danio rerio]                                           | 37.8 | 606    | 1090.85 | 2179.69 | 2179.07 | 56.63 | 0.0018 GGENIYPAEIEQFLHHPK       |
| 264 | gi 189530481 | PREDICTED: similar to LIM domain-containing protein 1 [Danio rerio]                    | 52   | 490    | 843.76  | 1685.51 | 1684.80 | 56.53 | 0.0021 HHSTIIQHNDGPSSR          |
| 265 | gi 189535572 | PREDICTED: hypothetical protein [Danio rerio]                                          | 71.6 | 455    | 758.93  | 1515.84 | 1517.74 | 37.74 | 0.17 CPDCPGLLPLHEPK             |
|     |              |                                                                                        |      |        | 654.52  | 1960.54 | 1959.96 | 44.47 | 0.031 FHDHRPGSVHPLGPDHR         |
| 266 | gi 41152375  | mitochondrial ATP synthase gamma-subunit [Danio rerio]                                 | 61.6 | 292    | 1097.58 | 1096.57 | 1095.60 | 55.25 | 0.003 HLIIGVSSDR                |
| 267 | gi 47086943  | ATP synthase, H+ transporting, mitochondrial F0 complex [Danio rerio]                  | 63.4 | 112    | 905.44  | 904.43  | 904.45  | 39.81 | 0.14 NLAEETTK                   |
|     |              |                                                                                        |      |        | 674.56  | 1347.10 | 1346.68 | 55.37 | 0.003 ASGGVVDAGPVYQK            |
| 268 | gi 52219158  | aquaporin 8 [Danio rerio]                                                              | 20.8 | 260    | 1058.86 | 2115.71 | 2113.97 | 55.02 | 0.0027 SELFTVATGDGGDNHQNPQK     |
| 269 | gi 68444185  | PREDICTED: cytochrome c oxidase subunit Vab [Danio rerio]                              | 76.2 | 172    | 487.46  | 972.90  | 971.54  | 40.97 | 0.1 LNDLASAIR                   |
|     |              |                                                                                        |      |        | 1659.13 | 3316.24 | 3314.75 | 50.52 | 0.0047 EIYPYVIQELKPTLQELGISTPEE |
| 271 | gi 153945848 | hypothetical protein LOC321053 [Danio rerio]                                           | 42.9 | 529    | 1059.44 | 1058.43 | 1058.47 | 54.82 | 0.004 EHDFSEAPK                 |
| 272 | gi 189516256 | PREDICTED: similar to phosphofructokinase, platelet [Danio rerio]                      | 42.6 | 782    | 706.78  | 1411.55 | 1411.69 | 54.77 | 0.0032 DLQSNVEHLTEK             |
| 273 | gi 41152189  | hypothetical protein LOC393720 [Danio rerio]                                           | 73.8 | 244    | 820.65  | 1639.28 | 1638.85 | 49.87 | 0.0098 RVEAIIINNYPEGHK          |
| 274 | gi 131888959 | hypothetical protein LOC100034538 [Danio rerio]                                        | 27   | 448    | 710.05  | 1418.09 | 1415.74 | 54.44 | 0.0037 EALGAENIQSTKR            |
| 275 | gi 47086817  | bscv (C20orf3) homolog [Danio rerio]                                                   | 19.8 | 415    | 1046.78 | 2091.54 | 2090.05 | 54.31 | 0.0031 LNRPHIITDETPEPQYK        |
| 276 | gi 189524989 | PREDICTED: neurobeachin-like 2 [Danio rerio]                                           | 46.4 | 1495   | 655.96  | 1309.91 | 1308.70 | 53.90 | 0.004 NNVAIEPLSAPGK             |
| 277 | gi 168229163 | cysteine-rich protein 2 [Danio rerio]                                                  | 51   | 206    | 999.01  | 2993.99 | 2996.41 | 51.77 | 0.004 TLAAGSHAEHDGQPYCHKPCYK    |
| 278 | gi 52219190  | hypothetical protein LOC447942 [Danio rerio]                                           | 69.9 | 103    | 1167.88 | 3500.62 | 3500.62 | 53.66 | 0.0021 TKPWPWGDGNHSLFHNPHNTA    |
| 279 | gi 189527668 | PREDICTED: similar to janus kinase and microtubule interacting protein 1 [Danio rerio] | 43.4 | 807    | 773.19  | 1544.36 | 1543.91 | 52.30 | 0.006 FQLKIAELQSVIR             |
| 280 | gi 46518516  | interferon 1 [Danio rerio]                                                             | 19   | 179    | 495.32  | 988.63  | 989.50  | 52.78 | 0.0065 MDIIASNAR                |
| 281 | gi 55925377  | peptidase (mitochondrial processing) alpha [Danio rerio]                               | 35.6 | 517    | 1388.81 | 2775.60 | 2773.44 | 52.53 | 0.0038 SKPAVAALGDLTELPSEYEDIQAA |

|     |              |                                                                         |      |      |         |         |         |       |        |                         |
|-----|--------------|-------------------------------------------------------------------------|------|------|---------|---------|---------|-------|--------|-------------------------|
| 282 | gi 189541652 | PREDICTED: similar to Myosin-3 (Myosin heavy chain 3)                   | 38.9 | 882  | 660.22  | 1318.42 | 1315.65 | 52.39 | 0.0061 | ELELELDAEQK             |
| 283 | gi 189546569 | PREDICTED: complement component 3 [Danio rerio]                         | 38.8 | 1648 | 652.15  | 1302.28 | 1301.65 | 52.01 | 0.0067 | EGTDQVIEGQVK            |
| 284 | gi 66773104  | branched chain keto acid dehydrogenase E1, alpha polypeptide            | 42.2 | 446  | 827.55  | 1653.08 | 1652.84 | 51.96 | 0.0059 | QGQIINPSEDPQLSK         |
| 285 | gi 189534068 | PREDICTED: nuclear RNA export factor 1 [Danio rerio]                    | 54   | 642  | 731.60  | 1461.18 | 1460.65 | 51.91 | 0.0065 | FGRRGGGGGGGGGPPSDGR     |
| 286 | gi 18858379  | carbonic anhydrase [Danio rerio]                                        | 50.4 | 260  | 502.52  | 1003.03 | 1000.54 | 37.51 | 0.22   | VLDALDDIK               |
|     |              |                                                                         |      |      | 824.69  | 2471.05 | 2471.13 | 51.80 | 0.0048 | QFHFHWGSSDDKGSEHTIAGT   |
| 287 | gi 56693302  | heat shock protein, alpha-crystallin-related, 1 [Danio rerio]           | 9.5  | 199  | 668.10  | 1334.18 | 1332.69 | 51.50 | 0.0071 | KYTLPPGVDSEK            |
| 288 | gi 148229906 | hypothetical protein LOC100037332 [Danio rerio]                         | 32.8 | 302  | 550.58  | 1099.15 | 1098.64 | 46.82 | 0.024  | LKQELAE LR              |
| 289 | gi 47271398  | ribosomal protein L7 [Danio rerio]                                      | 47.2 | 246  | 680.91  | 1359.81 | 1359.62 | 51.36 | 0.0076 | TTHFVEGGDAGNR           |
| 290 | gi 125854185 | PREDICTED: hypothetical protein [Danio rerio]                           | 28.2 | 645  | 674.08  | 1346.15 | 1346.62 | 50.90 | 0.0086 | EEEEEQKADK              |
| 291 | gi 41055997  | hypothetical protein LOC393098 [Danio rerio]                            | 54.5 | 343  | 863.60  | 1725.19 | 1724.92 | 50.74 | 0.0079 | DSTVLAHVMMKLLNER        |
| 292 | gi 125833577 | PREDICTED: similar to Galectin-3 (Galactose-specific lectin)            | 16.6 | 368  | 670.63  | 1339.24 | 1337.66 | 50.69 | 0.0082 | GHEVVFHFNPR             |
| 293 | gi 41055658  | 3-hydroxyisobutyrate dehydrogenase b [Danio rerio]                      | 67.2 | 329  | 867.36  | 1732.71 | 1729.95 | 50.68 | 0.0084 | KGSLIDSSTIDPAVSK        |
| 294 | gi 41054603  | actinin alpha 4 [Danio rerio]                                           | 27.1 | 901  | 762.20  | 1522.39 | 1520.71 | 50.51 | 0.0086 | AGTQIENIEEDFR           |
| 295 | gi 45387533  | hypothetical protein LOC323320 [Danio rerio]                            | 20.8 | 890  | 762.20  | 1522.39 | 1520.71 | 50.51 | 0.0086 |                         |
| 298 | gi 153791915 | hypothetical protein LOC100006671 [Danio rerio]                         | 37.7 | 151  | 762.20  | 1522.39 | 1520.71 | 50.51 | 0.0086 |                         |
| 299 | gi 66773056  | proteasome (prosome, macropain) subunit, alpha type, 2                  | 49.1 | 234  | 734.65  | 2200.92 | 2200.13 | 50.39 | 0.0077 | YNEDLELEDAIHTAILTLK     |
| 300 | gi 125845472 | PREDICTED: si:rp71-45k5.4 [Danio rerio]                                 | 59   | 234  | 734.65  | 2200.92 | 2200.13 | 50.39 | 0.0077 |                         |
| 301 | gi 189518402 | PREDICTED: similar to NLR family, CARD domain containing                | 51   | 995  | 951.97  | 950.96  | 951.47  | 46.42 | 0.022  | CFDDIVLK                |
| 302 | gi 116875779 | hypothetical protein LOC768287 [Danio rerio]                            | 47.7 | 474  | 549.51  | 1097.01 | 1094.55 | 50.25 | 0.01   | AELQHLNDR               |
| 303 | gi 156616344 | hypothetical protein LOC100124599 [Danio rerio]                         | 55.4 | 278  | 745.59  | 1489.17 | 1488.74 | 49.21 | 0.012  | ENQSVLITGESGAGK         |
| 304 | gi 189522138 | PREDICTED: similar to paxillin [Danio rerio]                            | 31.7 | 527  | 1149.87 | 2297.72 | 2294.99 | 45.75 | 0.021  | TWHPEHFVCTHCQEEIGSR     |
| 305 | gi 125814831 | PREDICTED: similar to zinc finger protein 585B [Danio rerio]            | 59.4 | 298  | 837.97  | 1673.92 | 1672.88 | 46.67 | 0.021  | EESEDVKIEEIIK           |
| 306 | gi 189524320 | PREDICTED: similar to family with sequence similarity 88                | 55.7 | 174  | 533.18  | 1064.34 | 1063.51 | 49.33 | 0.013  | SRVSDCLER               |
| 307 | gi 148224341 | hypothetical protein LOC100038781 [Danio rerio]                         | 38.9 | 226  | 538.13  | 1074.25 | 1073.56 | 49.09 | 0.015  | GIIHHISPEK              |
| 308 | gi 55742519  | vesicle-associated membrane protein 2 [Danio rerio]                     | 69.1 | 110  | 833.77  | 1665.53 | 1664.80 | 48.94 | 0.012  | ADALQAGASQFETSAAK       |
| 309 | gi 50344800  | vesicle-associated membrane protein 3 (cellubrevin) [Danio rerio]       | 65.7 | 102  | 833.77  | 1665.53 | 1664.80 | 48.94 | 0.012  | ADALQAGASQFETSAAK       |
| 310 | gi 47085833  | glyceraldehyde-3-phosphate dehydrogenase, spermatozoan                  | 51.3 | 335  | 718.66  | 1435.30 | 1434.76 | 48.73 | 0.013  | GAHQNIIPASTGAAK         |
| 311 | gi 153791419 | si:ch73-252g14.4 [Danio rerio]                                          | 22.8 | 386  | 829.77  | 2486.28 | 2486.30 | 48.59 | 0.0099 | VQQLLHAHTFGPQHNPVHGLF   |
| 312 | gi 189522849 | PREDICTED: similar to oxoglutarate (alpha-ketoglutarate)                | 26.2 | 961  | 1201.03 | 2400.04 | 2399.32 | 48.47 | 0.011  | NITLSLVANPSHLEAVNPVQGH  |
| 313 | gi 125814522 | PREDICTED: si:dkey-261e22.2 [Danio rerio]                               | 45.1 | 1868 | 653.21  | 1304.41 | 1303.69 | 48.31 | 0.016  | DTSSDALELLIK            |
| 314 | gi 47086525  | ribosomal protein S15a [Danio rerio]                                    | 62.3 | 130  | 567.82  | 1700.43 | 1699.80 | 48.27 | 0.014  | HGYIGEFEIIDDHR          |
| 315 | gi 189518965 | PREDICTED: similar to Acetyl-CoA carboxylase 2 (ACC)                    | 39.4 | 2240 | 836.89  | 1671.76 | 1672.86 | 48.19 | 0.014  | ESRGGVLEAEGTVEIK        |
| 316 | gi 41055407  | potassium channel, subfamily K, member 5 [Danio rerio]                  | 18.3 | 448  | 609.35  | 1216.68 | 1216.64 | 47.76 | 0.02   | KQEEELARSK              |
| 317 | gi 189533166 | PREDICTED: similar to G protein-coupled receptor 126 b                  | 25.1 | 1236 | 581.81  | 1161.61 | 1161.64 | 47.63 | 0.019  | LTSTVAWGLSK             |
| 318 | gi 68448495  | hypothetical protein LOC100003906 isoform 1 [Danio rerio]               | 38.4 | 915  | 911.39  | 1820.76 | 1820.84 | 47.56 | 0.016  | SDASYDEIQGSQPPSLK       |
| 319 | gi 125817349 | PREDICTED: similar to CAP-GLY domain containing link                    | 55.2 | 1041 | 686.11  | 1370.20 | 1368.68 | 47.37 | 0.018  | HEIDAAVMAKER            |
| 320 | gi 116004537 | hypothetical protein LOC564694 [Danio rerio]                            | 51.7 | 381  | 755.56  | 1509.10 | 1506.70 | 47.37 | 0.017  | GGDDLDPNYVLSSR          |
| 321 | gi 27545193  | creatine kinase, brain [Danio rerio]                                    | 50.9 | 381  | 755.56  | 1509.10 | 1506.70 | 47.37 | 0.017  |                         |
| 322 | gi 189527715 | PREDICTED: similar to dentin sialophosphoprotein [Danio rerio]          | 29.6 | 998  | 729.47  | 1456.93 | 1457.71 | 47.26 | 0.019  | SDNDPGSKINLGNK          |
| 323 | gi 35902802  | chromobox homolog 2 [Danio rerio]                                       | 51.4 | 510  | 609.35  | 1216.68 | 1215.67 | 47.20 | 0.022  | EQEKELLISK              |
| 324 | gi 41282163  | protein disulfide isomerase-related protein (provisional) [Danio rerio] | 60.9 | 440  | 559.48  | 1116.95 | 1114.60 | 49.77 | 0.013  | GSTATVGGGALPK           |
| 325 | gi 41054003  | Cap1 CAP, adenylate cyclase-associated protein 1 [Danio rerio]          | 58.5 | 463  | 994.76  | 1987.51 | 1985.99 | 46.71 | 0.018  | VENQEGAQNLVISDTLTK      |
| 326 | gi 189530311 | PREDICTED: hypothetical LOC555629 [Danio rerio]                         | 65.8 | 401  | 796.88  | 1591.74 | 1591.82 | 46.57 | 0.021  | QKMSLLSSNTEINK          |
| 327 | gi 46309527  | hypothetical protein LOC404610 [Danio rerio]                            | 40.6 | 325  | 724.76  | 1447.51 | 1447.76 | 46.36 | 0.024  | DALGILDELQAYK           |
| 328 | gi 41152453  | tyrosine 3-monooxygenase/tryptophan 5-monooxygenase                     | 40   | 245  | 605.07  | 1208.12 | 1206.61 | 46.19 | 0.025  | YLAEVAVGEEK             |
| 329 | gi 125852544 | PREDICTED: hypothetical protein [Danio rerio]                           | 31.6 | 174  | 699.83  | 1397.64 | 1398.63 | 46.09 | 0.024  | FTDEEVDELFR             |
| 330 | gi 47550703  | myosin, light polypeptide 9, like [Danio rerio]                         | 25   | 172  | 699.83  | 1397.64 | 1398.63 | 46.09 | 0.024  |                         |
| 331 | gi 189521867 | PREDICTED: similar to histone cluster 2, H2ab [Danio rerio]             | 69.4 | 144  | 1136.50 | 2270.98 | 2270.37 | 45.74 | 0.022  | LLGGVTIAQGGVLPNIQAVLLPK |
| 332 | gi 73611922  | histone 2, H2a [Danio rerio]                                            | 66.4 | 128  | 1136.50 | 2270.98 | 2270.37 | 45.74 | 0.022  |                         |
| 333 | gi 157073897 | ubiquinol-cytochrome c reductase, Rieske iron-sulfur polypeptide        | 42.9 | 273  | 773.42  | 1544.82 | 1542.79 | 45.70 | 0.028  | EIETEAGVNLAELR          |
| 334 | gi 189525434 | PREDICTED: im:7157373 [Danio rerio]                                     | 59.3 | 545  | 954.39  | 2860.13 | 2859.32 | 45.68 | 0.017  | SAAAPPKEEAPPANAPDGDAPA  |

|     |              |                                                              |      |      |         |         |         |       |       |                          |
|-----|--------------|--------------------------------------------------------------|------|------|---------|---------|---------|-------|-------|--------------------------|
| 335 | gi 189523403 | PREDICTED: NADH dehydrogenase (ubiquinone) flavop            | 31   | 516  | 994.20  | 1986.38 | 1983.93 | 45.62 | 0.024 | TTDSPPADTAAADVAVEEPK     |
| 336 | gi 189533816 | PREDICTED: hypothetical protein [Danio rerio]                | 39.1 | 1020 | 493.60  | 985.18  | 983.60  | 45.55 | 0.032 | QLIEQLLK                 |
| 337 | gi 189530783 | PREDICTED: hypothetical protein isoform 2 [Danio rerio]      | 33.3 | 222  | 493.60  | 985.18  | 983.65  | 45.55 | 0.032 | QILKKNLK                 |
| 338 | gi 50540198  | hypothetical protein LOC436839 [Danio rerio]                 | 34.8 | 201  | 721.18  | 1440.35 | 1439.63 | 45.52 | 0.027 | NIDEHANEDVER             |
| 339 | gi 116487349 | carboxylesterase 2-like [Danio rerio]                        | 43.6 | 555  | 1027.86 | 2053.71 | 2052.99 | 45.38 | 0.024 | TGSPNPAPVPWPVYDQSNK      |
| 340 | gi 125843378 | PREDICTED: si:dkey-38112.3 [Danio rerio]                     | 39.5 | 549  | 1027.86 | 2053.71 | 2052.99 | 45.38 | 0.024 | TGSPNPAPVPWPVYDQSNK      |
| 341 | gi 189522914 | PREDICTED: similar to RAS and EF-hand domain contai          | 37.6 | 551  | 506.72  | 1011.42 | 1012.59 | 45.19 | 0.031 | IVLAGDAAVVK              |
| 342 | gi 189523771 | PREDICTED: wu:fa11e05 [Danio rerio]                          | 44.1 | 715  | 664.43  | 1990.27 | 1988.96 | 45.09 | 0.026 | HHTILSDMASVPNFQHR        |
| 343 | gi 189523254 | PREDICTED: similar to CD22 antigen [Danio rerio]             | 29.8 | 392  | 770.71  | 1539.41 | 1540.76 | 45.09 | 0.029 | IFSISKISSDDSDK           |
| 344 | gi 61806508  | signal peptidase complex subunit 2 homolog [Danio rerio]     | 56.2 | 201  | 650.84  | 1299.66 | 1299.73 | 44.33 | 0.037 | AARNGKNSILEK             |
| 345 | gi 68435369  | PREDICTED: similar to Histone H1.5 (H1 VAR.5) (H1b) [        | 71.8 | 206  | 627.68  | 1253.35 | 1251.76 | 46.77 | 0.021 | ALVLNGTLVQPK             |
| 346 | gi 113679269 | hypothetical protein LOC751661 [Danio rerio]                 | 66.8 | 202  | 627.68  | 1253.35 | 1251.76 | 46.77 | 0.021 |                          |
| 347 | gi 68383957  | PREDICTED: apolipoprotein C-II isoform 1 [Danio rerio]       | 48   | 100  | 1014.03 | 2026.04 | 2024.92 | 44.92 | 0.027 | SYDQSVDTASGYVETIK        |
| 348 | gi 189536629 | PREDICTED: similar to DEP domain containing 2 [Danio         | 51.7 | 1600 | 611.27  | 1220.52 | 1218.70 | 44.63 | 0.037 | FNTIAIDGKK               |
| 349 | gi 189517917 | PREDICTED: similar to family with sequence similarity 4C     | 29.7 | 789  | 589.21  | 1176.41 | 1177.49 | 44.53 | 0.04  | VEMESDSPER               |
| 350 | gi 47777321  | ectodermal-neural cortex (with BTB-like domain) [Danio r     | 41.8 | 273  | 433.25  | 864.49  | 863.42  | 44.51 | 0.035 | AVLASCSR                 |
| 351 | gi 90652819  | hypothetical protein LOC664756 [Danio rerio]                 | 66   | 462  | 766.50  | 765.49  | 765.39  | 39.76 | 0.091 | FEEITK                   |
|     |              |                                                              |      |      | 973.85  | 2918.52 | 2915.57 | 44.47 | 0.022 | EGGANGVTLLLEALDSILPPSRPT |
| 352 | gi 50233897  | FLJ12716-like protein [Danio rerio]                          | 25.9 | 1132 | 1188.77 | 1187.76 | 1187.63 | 44.42 | 0.043 | TAYSLVHELK               |
| 353 | gi 189529141 | PREDICTED: similar to NLR family, pyrin domain contain       | 45.5 | 789  | 487.46  | 972.90  | 973.52  | 44.41 | 0.045 | DSAALASALR               |
| 354 | gi 153945891 | hypothetical protein LOC100101652 [Danio rerio]              | 53.2 | 293  | 713.31  | 1424.60 | 1424.85 | 44.33 | 0.036 | RALTIQEIAALAR            |
| 355 | gi 189530012 | PREDICTED: wu:fb94b04 [Danio rerio]                          | 48.3 | 762  | 551.34  | 1100.67 | 1098.61 | 44.29 | 0.046 | KLNEAQQLR                |
| 356 | gi 41056221  | hypothetical protein LOC393533 [Danio rerio]                 | 29.8 | 617  | 566.38  | 1130.75 | 1129.72 | 44.21 | 0.045 | SSLRLKVLSK               |
| 357 | gi 47086263  | phosphoglucomutase 2 [Danio rerio]                           | 57.1 | 611  | 522.11  | 1042.20 | 1043.57 | 43.80 | 0.048 | ELNRNTAVK                |
| 358 | gi 123708080 | hypothetical protein LOC791153 [Danio rerio]                 | 29.9 | 304  | 916.46  | 915.45  | 914.55  | 43.74 | 0.053 | IVATAKAGGK               |
| 359 | gi 189530864 | PREDICTED: similar to RIKEN cDNA 2810405J04 gene             | 46.3 | 516  | 581.62  | 1161.23 | 1160.63 | 43.73 | 0.047 | LCAWLVSSELK              |
| 360 | gi 189525167 | PREDICTED: hypothetical protein [Danio rerio]                | 43   | 1100 | 762.20  | 1522.39 | 1520.80 | 43.56 | 0.042 | VQLLQDLQDFFR             |
| 361 | gi 189533677 | PREDICTED: hypothetical protein [Danio rerio]                | 55.5 | 128  | 531.01  | 1060.01 | 1058.51 | 43.41 | 0.057 | MQNHFGAVR                |
| 362 | gi 189530862 | PREDICTED: wu:fb54a03 [Danio rerio]                          | 32.2 | 727  | 401.07  | 800.12  | 800.46  | 43.33 | 0.056 | ELEGLLK                  |
| 363 | gi 189520791 | PREDICTED: family with sequence similarity 62 (C2 dom        | 32   | 1700 | 738.59  | 1475.17 | 1473.84 | 40.52 | 0.089 | IDFGGKPMKVVGK            |
|     |              |                                                              |      |      | 1094.98 | 3281.90 | 3280.56 | 43.09 | 0.027 | QKPVVEDHSTGEEHEEKGPAT/   |
| 364 | gi 189528097 | PREDICTED: similar to sushi-repeat-containing protein, >     | 53.7 | 436  | 537.92  | 1073.83 | 1072.61 | 43.02 | 0.062 | LKCPLSREK                |
|     |              |                                                              |      |      | 540.64  | 1079.26 | 1078.45 | 36.46 | 0.24  | SSVQCMPNR                |
| 365 | gi 45433520  | hypothetical protein LOC327237 [Danio rerio]                 | 34.4 | 157  | 707.70  | 1413.38 | 1413.81 | 42.98 | 0.05  | ISREVIQMVLR              |
| 366 | gi 113678297 | nudix (nucleoside diphosphate linked moiety X)-type moti     | 22.7 | 242  | 1056.28 | 2110.55 | 2110.04 | 42.84 | 0.044 | SKPKPLQPAEEEESESTEPK     |
| 367 | gi 53292609  | clathrin, heavy polypeptide a (Hc) [Danio rerio]             | 36.8 | 1680 | 472.54  | 943.07  | 942.49  | 42.73 | 0.063 | HELIEFR                  |
| 368 | gi 189532250 | PREDICTED: si:ch211-81a5.3 [Danio rerio]                     | 49.7 | 2962 | 771.84  | 1541.67 | 1540.86 | 42.63 | 0.054 | TDDPRSLLQLLK             |
| 369 | gi 32401408  | annexin A11b [Danio rerio]                                   | 34.6 | 485  | 886.82  | 1771.62 | 1770.84 | 42.54 | 0.053 | SLYTHISGDTSGDYKK         |
| 370 | gi 47086993  | palmitoyl-protein thioesterase 1 (ceroid-lipofuscinosis, ne  | 29.4 | 303  | 752.86  | 2255.55 | 2254.08 | 42.45 | 0.047 | HLVQAQYWHDPNLDDLYK       |
| 371 | gi 189522065 | PREDICTED: similar to Histone H1.2 (H1 VAR.1) (H1c) [I       | 75.5 | 200  | 456.60  | 1366.76 | 1365.83 | 44.67 | 0.032 | AKKAGPGVGVGELIVK         |
| 372 | gi 147905490 | hypothetical protein LOC100037379 [Danio rerio]              | 90.4 | 115  | 456.60  | 1366.76 | 1365.83 | 44.67 | 0.032 |                          |
| 373 | gi 82658210  | protein phosphatase 1, regulatory (inhibitor) subunit 7 [D   | 40.9 | 345  | 1090.76 | 2179.50 | 2178.14 | 41.86 | 0.053 | VLENLDSLSSLESFLGTNK      |
| 374 | gi 41053347  | mitochondrial trifunctional protein, beta subunit [Danio rei | 39.3 | 471  | 561.67  | 1121.32 | 1119.56 | 36.12 | 0.26  | LEQDEFALR                |
|     |              |                                                              |      |      | 1197.60 | 1196.59 | 1196.57 | 41.61 | 0.069 | DFVYVSQDPK               |
| 375 | gi 189531881 | PREDICTED: solute carrier family 8 (sodium-calcium exc       | 23.6 | 967  | 770.74  | 1539.47 | 1536.85 | 41.54 | 0.066 | RPSIGGELGGPRVSR          |
| 376 | gi 52219178  | high-mobility group box 2 [Danio rerio]                      | 48.6 | 214  | 705.76  | 1409.50 | 1407.74 | 41.51 | 0.068 | SEHPNLTIGEIAK            |
| 377 | gi 47086505  | fibrinogen, B beta polypeptide [Danio rerio]                 | 65.2 | 485  | 1376.63 | 1375.62 | 1375.70 | 48.45 | 0.015 | DTVVDVTFPQNIK            |
| 378 | gi 189526982 | PREDICTED: similar to G protein-coupled receptor 103 [I      | 36.7 | 422  | 500.54  | 999.06  | 998.59  | 41.05 | 0.09  | IGIELWIR                 |
